# Supplementary material
Source: MDPI journal article supplement (https://www.mdpi.com/2304-6740/11/6/255)
Supplement: s1 [file s1]

*Supporting Information*  
*for*  
**Molecular Switching through Chalcogen Bond-Induced Isomerization of Binuclear  
(Diaminocarbene)Pd<sup>II</sup> Complexes**

*Roman A. Popov, Alexander S. Novikov, Vitalii V. Suslonov and Vadim P. Boyarskiy\**

Table of Contents

|                   |   |
|-------------------|---|
| NMR spectra ..... | 2 |
| Table S1 .....    | 6 |
| Table S2 .....    | 6 |

## NMR spectra

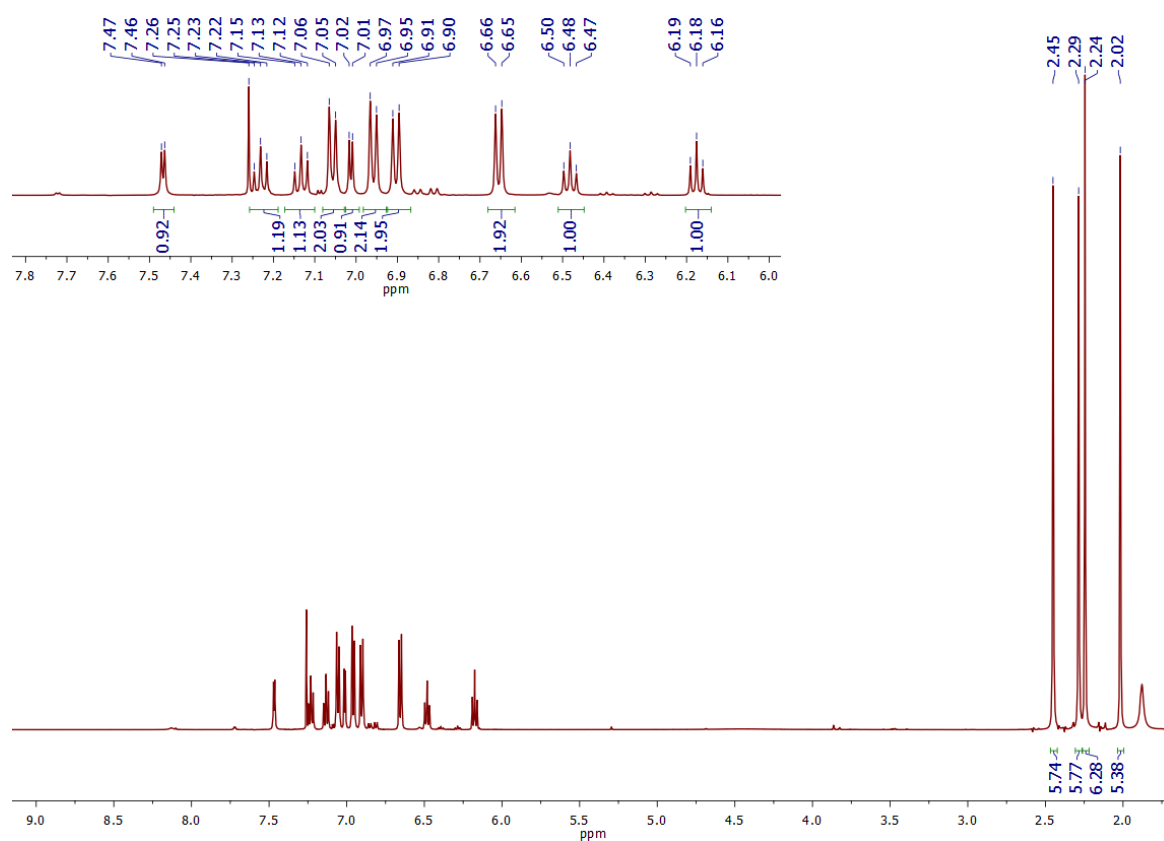

**Figure S1.** The <sup>1</sup>H NMR spectrum of **4a** with traces of **4b** in CDCl<sub>3</sub>.

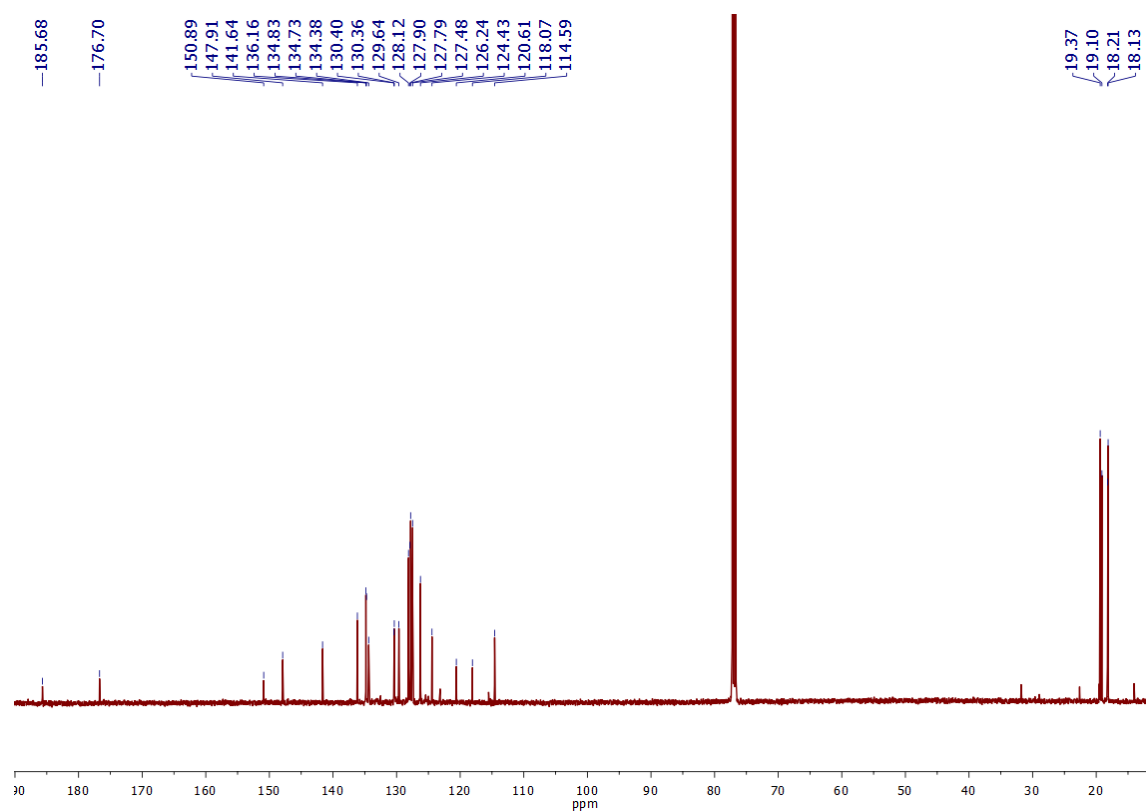

**Figure S2.** The <sup>13</sup>C NMR spectrum of **4a** with traces of **4b** in CDCl<sub>3</sub>.

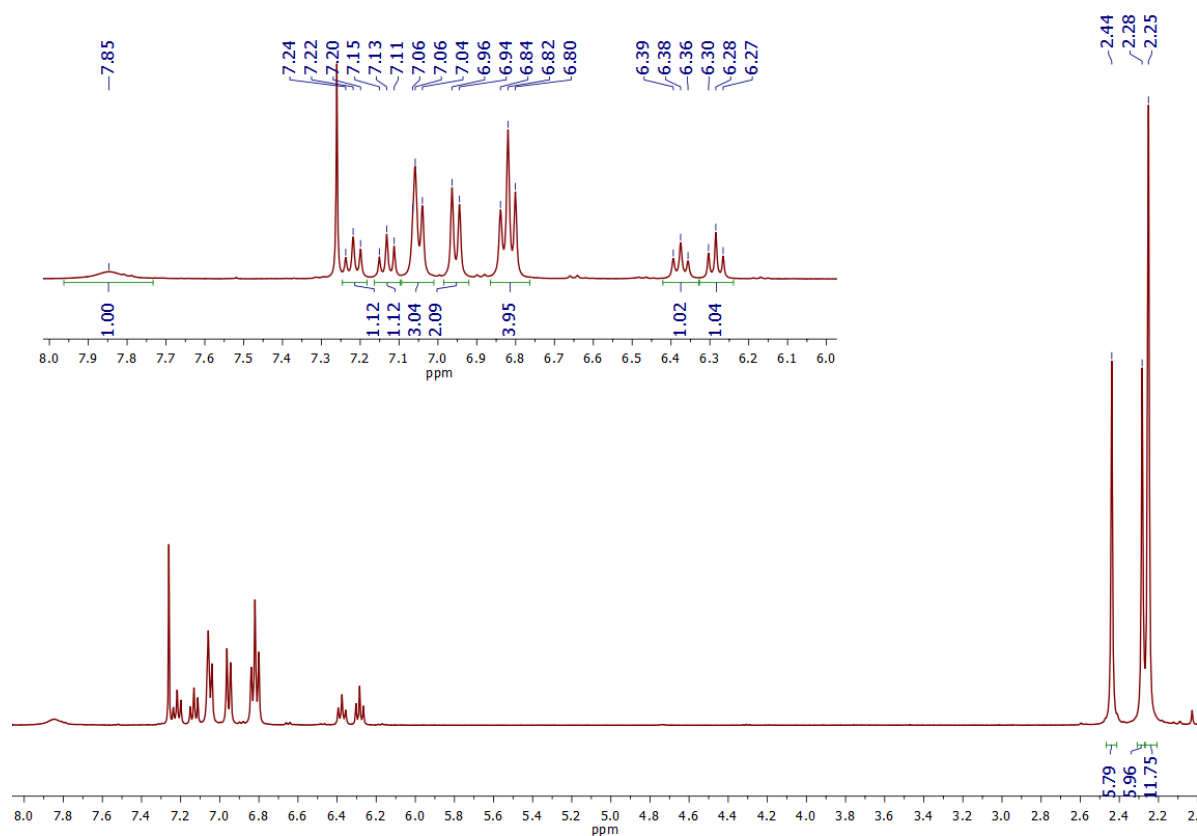

**Figure S3.** The <sup>1</sup>H NMR spectrum of **4b** with traces of **4a** in CDCl<sub>3</sub>.

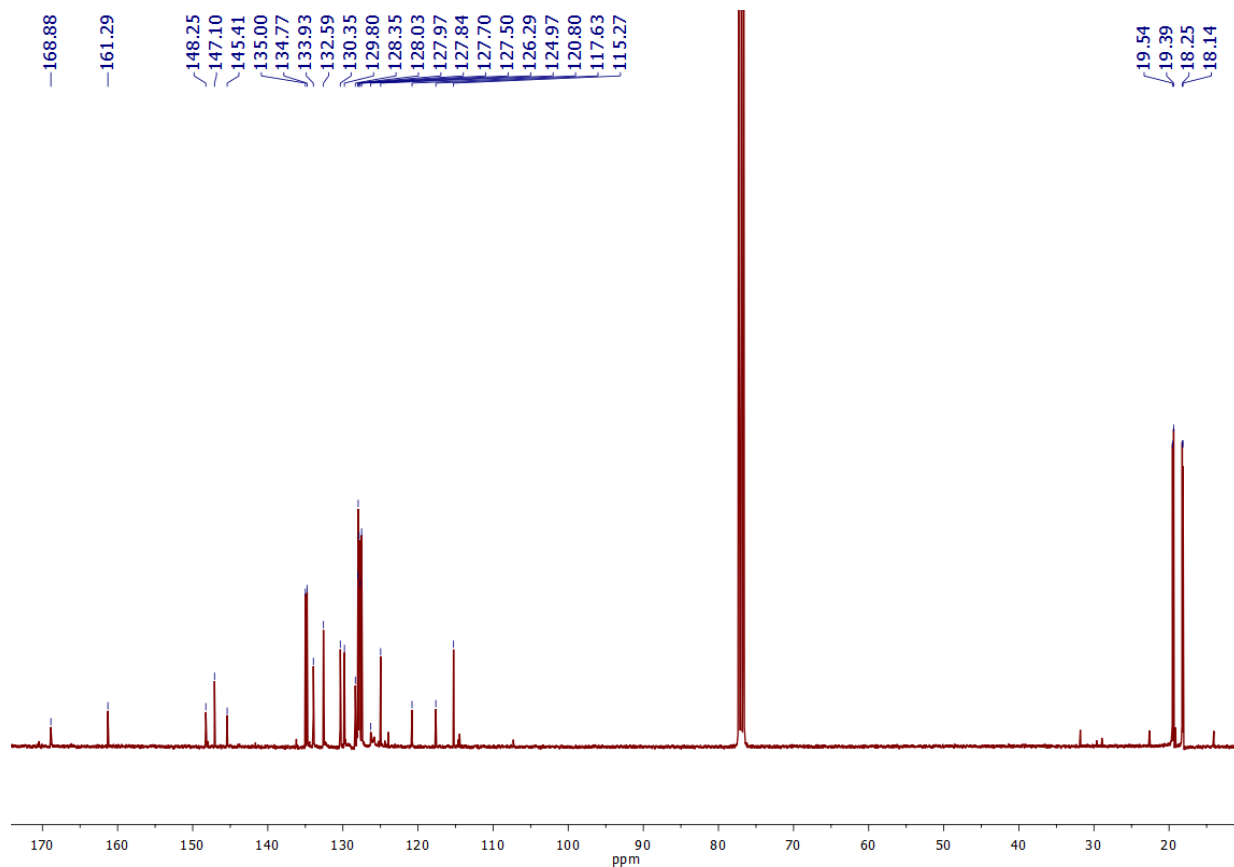

**Figure S4.** The <sup>13</sup>C NMR spectrum of **4b** with traces of **4a** in CDCl<sub>3</sub>.

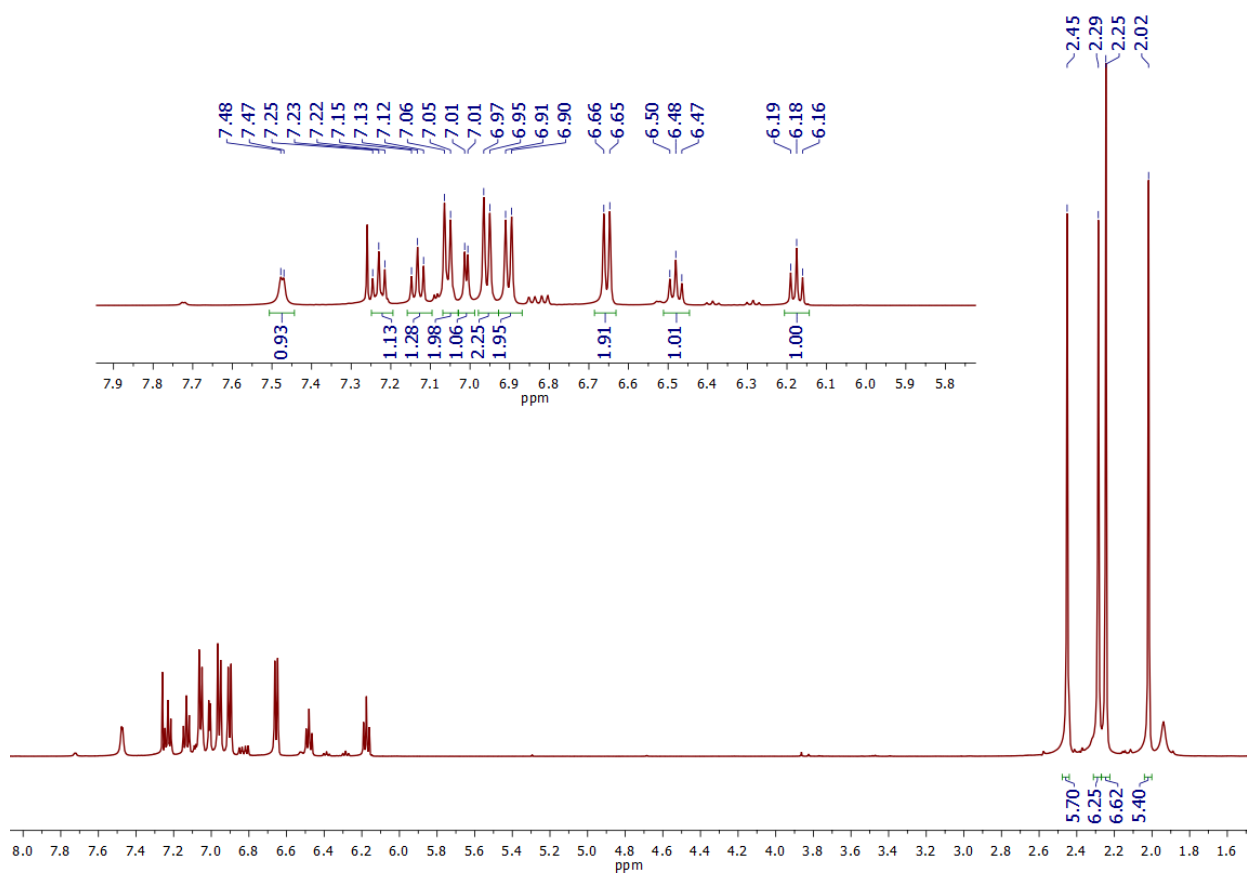

**Figure S5.** The <sup>1</sup>H NMR spectrum of **5a** with traces of **5b** in CDCl<sub>3</sub>.

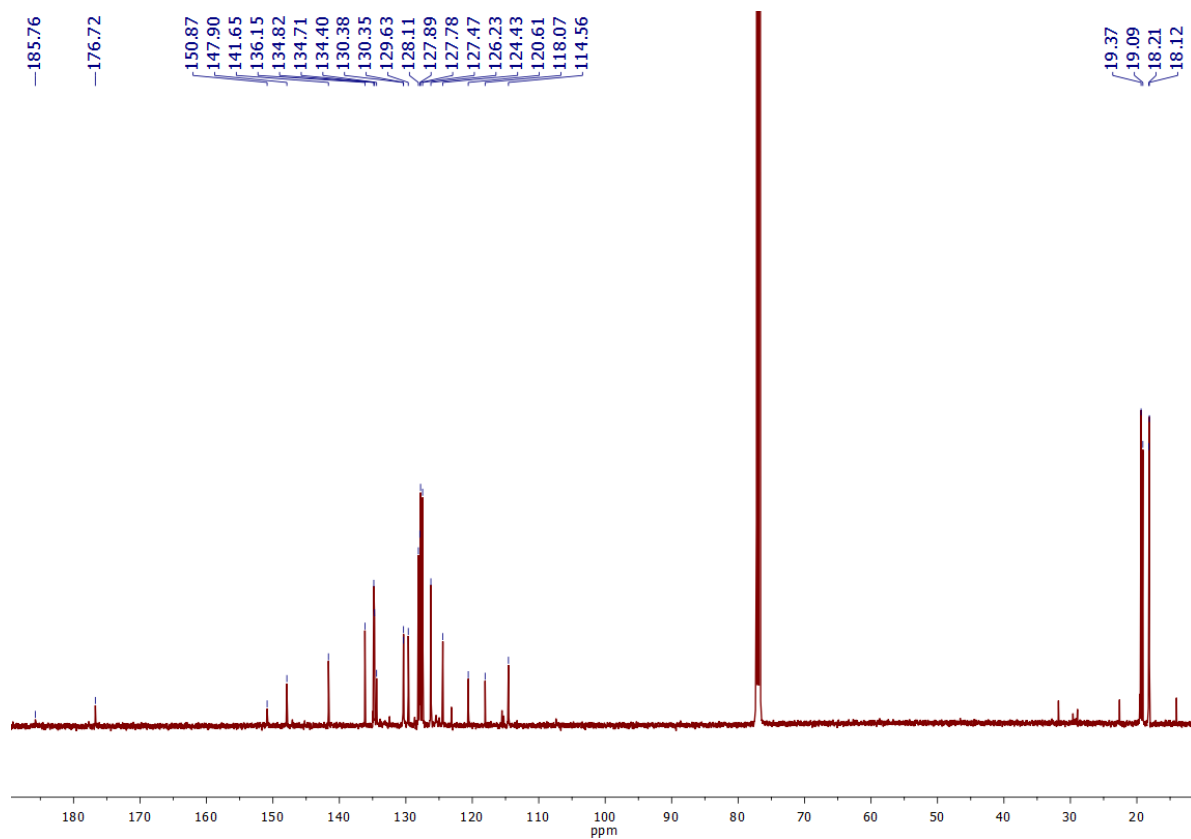

**Figure S6.** The <sup>13</sup>C NMR spectrum of **5a** with traces of **5b** in CDCl<sub>3</sub>.

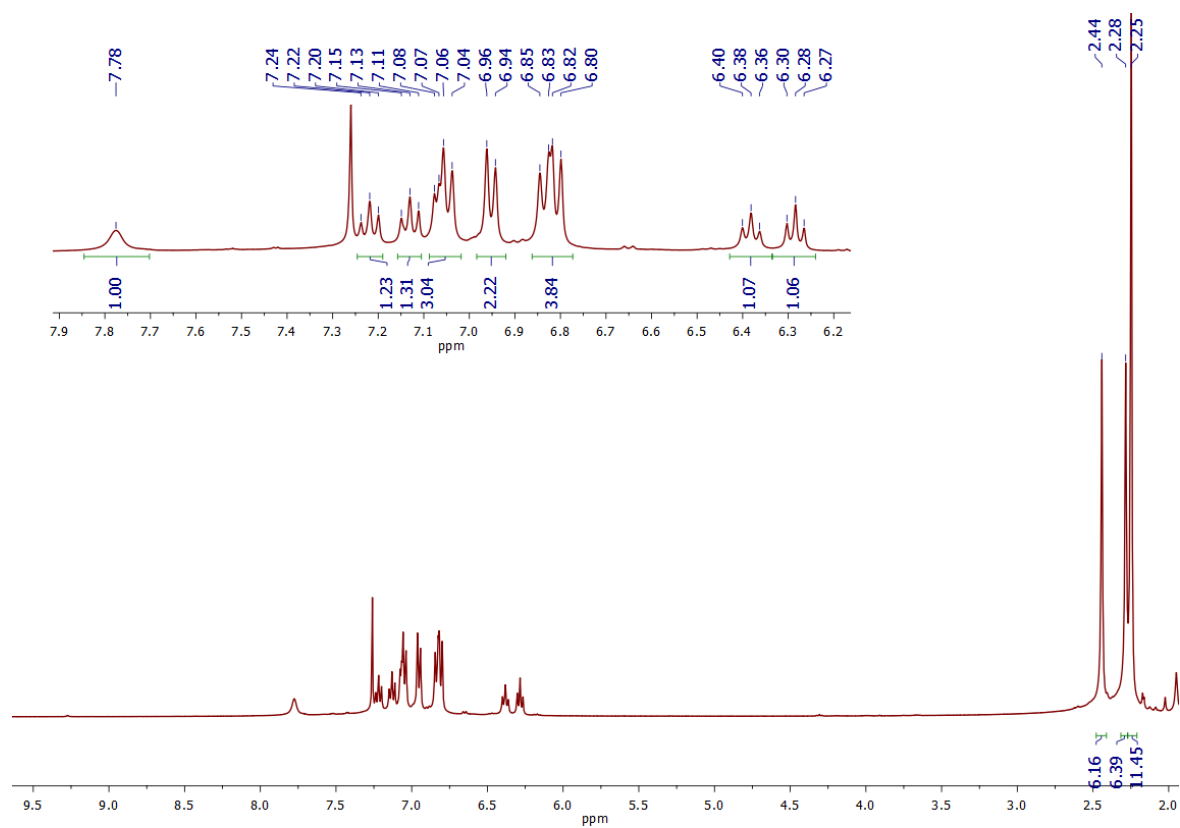

**Figure S7.** The <sup>1</sup>H NMR spectrum of **5b** with traces of **5a** in CDCl<sub>3</sub>.

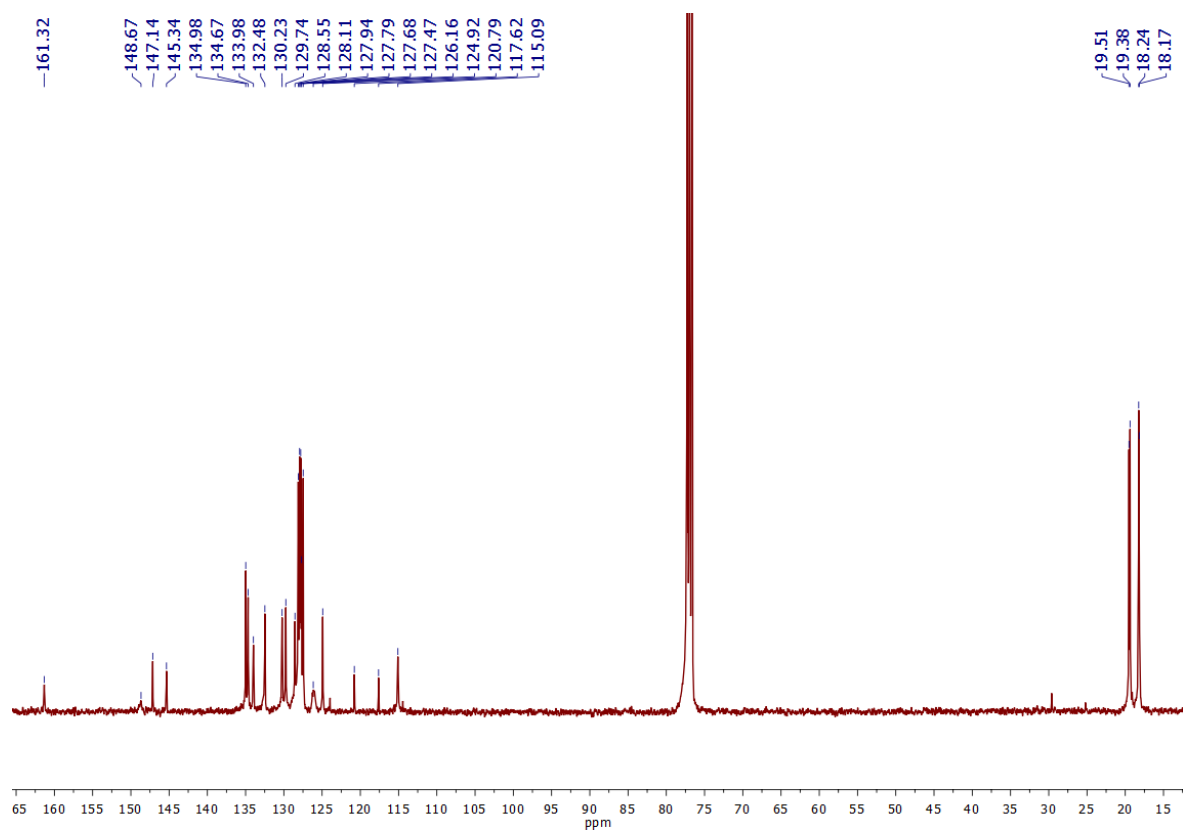

**Figure S8.** The <sup>13</sup>C NMR spectrum of **5b** with traces of **5a** in CDCl<sub>3</sub>.

**Table S1.** Crystal data and structure refinement for **4b**, **5b**

| Identification code                         | <b>4b</b>                                                                                        | <b>5b</b>                                                                       |
|---------------------------------------------|--------------------------------------------------------------------------------------------------|---------------------------------------------------------------------------------|
| Empirical formula                           | C <sub>40</sub> H <sub>39</sub> Br <sub>2</sub> Cl <sub>3</sub> N <sub>6</sub> Pd <sub>2</sub> S | C <sub>39</sub> H <sub>38</sub> I <sub>2</sub> N <sub>6</sub> Pd <sub>2</sub> S |
| Formula weight                              | 1114.80                                                                                          | 1089.41                                                                         |
| Temperature/K                               | 100(2)                                                                                           | 100.01(10)                                                                      |
| Crystal system                              | monoclinic                                                                                       | monoclinic                                                                      |
| Space group                                 | P2 <sub>1</sub> /c                                                                               | P2 <sub>1</sub> /c                                                              |
| a/Å                                         | 8.15286(19)                                                                                      | 16.6540(4)                                                                      |
| b/Å                                         | 18.9330(4)                                                                                       | 16.7752(3)                                                                      |
| c/Å                                         | 28.0248(7)                                                                                       | 15.3610(3)                                                                      |
| α/°                                         | 90                                                                                               | 90                                                                              |
| β/°                                         | 95.618(2)                                                                                        | 111.854(3)                                                                      |
| γ/°                                         | 90                                                                                               | 90                                                                              |
| Volume/Å <sup>3</sup>                       | 4305.07(17)                                                                                      | 3983.08(17)                                                                     |
| Z                                           | 4                                                                                                | 4                                                                               |
| ρ <sub>calc</sub> /cm <sup>3</sup>          | 1.720                                                                                            | 1.817                                                                           |
| μ/mm <sup>-1</sup>                          | 2.963                                                                                            | 2.541                                                                           |
| F(000)                                      | 2200.0                                                                                           | 2112.0                                                                          |
| Crystal size/mm <sup>3</sup>                | 0.2 × 0.2 × 0.2                                                                                  | 0.3 × 0.25 × 0.25                                                               |
| Radiation                                   | MoKα (λ = 0.71073)                                                                               | MoKα (λ = 0.71073)                                                              |
| 2Θ range for data collection/°              | 5.462 to 55                                                                                      | 5.636 to 55                                                                     |
| Index ranges                                | -10 ≤ h ≤ 10, -24 ≤ k ≤ 24, -36 ≤ l ≤ 36                                                         | -21 ≤ h ≤ 21, -21 ≤ k ≤ 21, -18 ≤ l ≤ 19                                        |
| Reflections collected                       | 57722                                                                                            | 23322                                                                           |
| Independent reflections                     | 9898 [R <sub>int</sub> = 0.0369, R <sub>sigma</sub> = 0.0258]                                    | 9143 [R <sub>int</sub> = 0.0284, R <sub>sigma</sub> = 0.0369]                   |
| Data/restraints/parameters                  | 9898/0/495                                                                                       | 9143/0/459                                                                      |
| Goodness-of-fit on F <sup>2</sup>           | 1.072                                                                                            | 1.064                                                                           |
| Final R indexes [I ≥ 2σ (I)]                | R <sub>1</sub> = 0.0264, wR <sub>2</sub> = 0.0573                                                | R <sub>1</sub> = 0.0287, wR <sub>2</sub> = 0.0629                               |
| Final R indexes [all data]                  | R <sub>1</sub> = 0.0334, wR <sub>2</sub> = 0.0600                                                | R <sub>1</sub> = 0.0373, wR <sub>2</sub> = 0.0673                               |
| Largest diff. peak/hole / e Å <sup>-3</sup> | 0.71/-0.86                                                                                       | 0.98/-1.48                                                                      |
| CCDC number                                 | 2263952                                                                                          | 2263951                                                                         |

**Table S2.** Cartesian atomic coordinates of optimized equilibrium model structures.

| Atom      | X         | Y         | Z         |
|-----------|-----------|-----------|-----------|
| <b>4a</b> |           |           |           |
| C         | -3.046958 | -2.768404 | 1.514888  |
| C         | -2.435341 | -2.609449 | 0.257444  |
| C         | -3.011257 | -3.153911 | -0.905268 |
| C         | -4.211622 | -3.852766 | -0.788942 |
| C         | -4.827944 | -4.024355 | 0.446401  |
| C         | -4.244952 | -3.479084 | 1.585518  |
| N         | -1.174831 | -2.020032 | 0.176124  |
| C         | -0.899109 | -0.794988 | 0.063862  |
| Pd        | -2.018181 | 0.878278  | -0.073994 |
| Br        | -3.409643 | 2.940133  | -0.245902 |

|    |           |           |           |
|----|-----------|-----------|-----------|
| C  | -2.343696 | -2.973194 | -2.232975 |
| C  | -2.422586 | -2.180269 | 2.741896  |
| N  | -0.082506 | 1.713247  | -0.012011 |
| C  | 0.367706  | 3.007558  | 0.016166  |
| N  | 1.668665  | 3.259086  | 0.057601  |
| C  | 1.969803  | 4.598769  | 0.095405  |
| C  | 0.880486  | 5.396768  | 0.086455  |
| S  | -0.585036 | 4.455553  | 0.019150  |
| Pd | 2.814421  | 1.560722  | 0.036739  |
| Br | 4.948785  | 2.763496  | 0.079168  |
| C  | 3.930293  | -0.040249 | -0.019680 |
| N  | 4.779609  | -0.837594 | -0.065626 |
| C  | 5.821391  | -1.745568 | -0.127797 |
| C  | 6.387887  | -2.185706 | 1.076713  |
| C  | 7.421977  | -3.113409 | 0.984022  |
| C  | 7.865171  | -3.568238 | -0.253764 |
| C  | 7.289421  | -3.096500 | -1.428951 |
| C  | 6.249549  | -2.171669 | -1.393234 |
| C  | 5.894478  | -1.662089 | 2.386461  |
| C  | 5.610624  | -1.634008 | -2.632205 |
| C  | 0.907259  | 0.802972  | 0.006531  |
| N  | 0.517639  | -0.478857 | 0.026450  |
| C  | 1.436033  | -1.588196 | 0.056620  |
| C  | 1.853985  | -2.076564 | 1.298488  |
| C  | 2.667375  | -3.209915 | 1.307650  |
| C  | 3.045816  | -3.825363 | 0.119690  |
| C  | 2.618532  | -3.313252 | -1.100558 |
| C  | 1.799106  | -2.185119 | -1.154756 |
| C  | 1.500666  | -1.370581 | 2.570143  |
| C  | 1.373848  | -1.602955 | -2.466612 |
| C  | -3.769725 | -0.005984 | -0.142588 |
| N  | -4.911888 | -0.246465 | -0.188038 |
| C  | -6.277950 | -0.453032 | -0.151737 |
| C  | -6.947738 | -0.712589 | -1.354406 |
| C  | -8.322524 | -0.919094 | -1.279737 |
| C  | -8.986151 | -0.867764 | -0.057943 |
| C  | -8.288361 | -0.605577 | 1.117128  |
| C  | -6.912646 | -0.394605 | 1.097749  |
| C  | -6.193608 | -0.754743 | -2.643730 |
| C  | -6.117090 | -0.121973 | 2.333170  |
| H  | -4.660392 | -4.276730 | -1.688380 |
| H  | -5.761299 | -4.579911 | 0.520940  |
| H  | -4.719796 | -3.609942 | 2.559123  |
| H  | -2.321384 | -1.915588 | -2.537892 |
| H  | -2.870722 | -3.530584 | -3.017307 |
| H  | -1.299799 | -3.318845 | -2.210288 |
| H  | -1.391405 | -2.536993 | 2.882601  |
| H  | -2.997002 | -2.443541 | 3.638701  |
| H  | -2.372420 | -1.081520 | 2.688523  |
| H  | 3.013875  | 4.894218  | 0.125190  |
| H  | 0.836435  | 6.479553  | 0.105410  |
| H  | 7.883349  | -3.479139 | 1.900529  |

|           |            |           |           |
|-----------|------------|-----------|-----------|
| H         | 8.674928   | -4.293977 | -0.303742 |
| H         | 7.647849   | -3.448254 | -2.395660 |
| H         | 5.973456   | -0.566367 | 2.435995  |
| H         | 6.468821   | -2.082954 | 3.218980  |
| H         | 4.833576   | -1.909757 | 2.544678  |
| H         | 6.076940   | -2.054731 | -3.529725 |
| H         | 5.695404   | -0.538777 | -2.684108 |
| H         | 4.536185   | -1.870622 | -2.662108 |
| H         | 3.002370   | -3.612436 | 2.264150  |
| H         | 3.685879   | -4.706566 | 0.144075  |
| H         | 2.915182   | -3.797143 | -2.031770 |
| H         | 0.450336   | -1.052315 | 2.594605  |
| H         | 2.111075   | -0.461479 | 2.695824  |
| H         | 1.686510   | -2.012420 | 3.439598  |
| H         | 1.974117   | -0.715102 | -2.722305 |
| H         | 0.324970   | -1.280291 | -2.460216 |
| H         | 1.503208   | -2.330065 | -3.277448 |
| H         | -8.874687  | -1.122690 | -2.196742 |
| H         | -10.061658 | -1.031865 | -0.020983 |
| H         | -8.813960  | -0.563996 | 2.070427  |
| H         | -5.440816  | -1.557338 | -2.636762 |
| H         | -5.652704  | 0.186118  | -2.820495 |
| H         | -6.867888  | -0.927252 | -3.489565 |
| H         | -6.761961  | -0.081847 | 3.217965  |
| H         | -5.573037  | 0.831372  | 2.259011  |
| H         | -5.359638  | -0.905188 | 2.495629  |
| <b>5a</b> |            |           |           |
| C         | 3.370969   | 1.880305  | 2.277958  |
| C         | 2.642117   | 2.390418  | 1.188548  |
| C         | 3.179916   | 3.385278  | 0.351989  |
| C         | 4.481453   | 3.822054  | 0.587018  |
| C         | 5.227186   | 3.313825  | 1.645016  |
| C         | 4.664099   | 2.362671  | 2.487240  |
| N         | 1.329714   | 1.974757  | 0.937973  |
| C         | 0.985254   | 0.848465  | 0.492716  |
| Pd        | 2.014824   | -0.810418 | -0.037234 |
| I         | 3.451463   | -3.041563 | -0.896958 |
| C         | 2.376199   | 3.917513  | -0.792302 |
| C         | 2.796831   | 0.832134  | 3.180544  |
| N         | 0.051665   | -1.569900 | 0.199684  |
| C         | -0.452175  | -2.834045 | 0.327716  |
| N         | -1.759677  | -3.052612 | 0.302514  |
| C         | -2.090893  | -4.366419 | 0.536706  |
| C         | -1.026629  | -5.170094 | 0.754605  |
| S         | 0.459713   | -4.268035 | 0.648856  |
| Pd        | -2.827966  | -1.304856 | 0.039205  |
| I         | -5.255045  | -2.503165 | -0.124417 |
| C         | -3.823568  | 0.350665  | -0.240511 |
| N         | -4.568025  | 1.234944  | -0.395317 |
| C         | -5.474518  | 2.278940  | -0.455174 |
| C         | -6.121796  | 2.642480  | 0.735544  |
| C         | -6.994753  | 3.725129  | 0.672315  |



|   |           |           |           |
|---|-----------|-----------|-----------|
| C | -7.213315 | 4.396416  | -0.526381 |
| C | -6.574056 | 3.989236  | -1.692847 |
| C | -5.691618 | 2.912244  | -1.686138 |
| C | -5.868613 | 1.892449  | 2.002754  |
| C | -5.004329 | 2.433795  | -2.923214 |
| C | -0.892783 | -0.614243 | 0.179658  |
| N | -0.438921 | 0.642271  | 0.289849  |
| C | -1.281291 | 1.813078  | 0.263717  |
| C | -1.842299 | 2.284158  | 1.455752  |
| C | -2.588603 | 3.462084  | 1.398034  |
| C | -2.753669 | 4.145043  | 0.198774  |
| C | -2.178691 | 3.656218  | -0.968161 |
| C | -1.429251 | 2.478790  | -0.958010 |
| C | -1.685742 | 1.538198  | 2.742780  |
| C | -0.852122 | 1.926957  | -2.224703 |
| C | 3.736585  | 0.103126  | -0.304072 |
| N | 4.823453  | 0.486513  | -0.494840 |
| C | 6.148444  | 0.868973  | -0.606618 |
| C | 6.508371  | 1.768618  | -1.619580 |
| C | 7.841820  | 2.166605  | -1.668118 |
| C | 8.766742  | 1.679768  | -0.750510 |
| C | 8.378037  | 0.774098  | 0.230961  |
| C | 7.057189  | 0.343382  | 0.324961  |
| C | 5.492941  | 2.271985  | -2.593100 |
| C | 6.606058  | -0.621840 | 1.372824  |
| H | 4.910303  | 4.576836  | -0.073944 |
| H | 6.247451  | 3.658028  | 1.810817  |
| H | 5.236397  | 1.972557  | 3.330150  |
| H | 2.197712  | 3.145784  | -1.557887 |
| H | 2.889425  | 4.755982  | -1.279443 |
| H | 1.387799  | 4.265207  | -0.460168 |
| H | 1.823594  | 1.133663  | 3.593501  |
| H | 3.472438  | 0.630906  | 4.020961  |
| H | 2.633913  | -0.119256 | 2.648694  |
| H | -3.137307 | -4.654725 | 0.523632  |
| H | -1.011509 | -6.238189 | 0.936802  |
| H | -7.511632 | 4.037295  | 1.578987  |
| H | -7.898259 | 5.241996  | -0.553472 |
| H | -6.762533 | 4.507680  | -2.632200 |
| H | -6.123127 | 0.827519  | 1.898264  |
| H | -6.461357 | 2.304392  | 2.826584  |
| H | -4.807417 | 1.935103  | 2.290821  |
| H | -5.287165 | 3.041760  | -3.789631 |
| H | -5.260756 | 1.387572  | -3.142980 |
| H | -3.910060 | 2.475843  | -2.818929 |
| H | -3.034166 | 3.849792  | 2.314758  |
| H | -3.344428 | 5.060470  | 0.171950  |
| H | -2.309469 | 4.191293  | -1.909174 |
| H | -0.633304 | 1.310754  | 2.958037  |
| H | -2.223725 | 0.577599  | 2.722427  |
| H | -2.082052 | 2.121234  | 3.582361  |
| H | -1.398920 | 1.029528  | -2.555369 |

|   |           |           |           |
|---|-----------|-----------|-----------|
| H | 0.199220  | 1.628002  | -2.113876 |
| H | -0.910710 | 2.665487  | -3.033182 |
| H | 8.153344  | 2.867329  | -2.442006 |
| H | 9.804206  | 2.004876  | -0.804459 |
| H | 9.107528  | 0.388142  | 0.942167  |
| H | 4.682371  | 2.811773  | -2.081934 |
| H | 5.023630  | 1.447693  | -3.148188 |
| H | 5.949821  | 2.953284  | -3.319412 |
| H | 7.443333  | -0.923144 | 2.012018  |
| H | 6.172697  | -1.529076 | 0.927326  |
| H | 5.827220  | -0.181835 | 2.015348  |

---

**4b**

|    |           |           |           |
|----|-----------|-----------|-----------|
| C  | 6.193056  | -2.230152 | -1.185775 |
| C  | 5.703360  | -1.726103 | 0.026594  |
| C  | 6.132592  | -2.167820 | 1.286296  |
| C  | 7.071636  | -3.195324 | 1.307120  |
| C  | 7.562062  | -3.737918 | 0.123730  |
| C  | 7.131508  | -3.255635 | -1.108160 |
| N  | 4.734956  | -0.740170 | -0.017862 |
| C  | 3.909392  | 0.082529  | -0.023849 |
| Pd | 2.801735  | 1.685918  | -0.013809 |
| Br | 4.910287  | 2.937882  | 0.010948  |
| C  | 5.588510  | -1.553105 | 2.534697  |
| C  | 5.710420  | -1.679852 | -2.488368 |
| C  | 0.939288  | 0.835984  | -0.029840 |
| N  | -0.075653 | 1.804963  | -0.026799 |
| C  | 0.330648  | 3.120229  | -0.009177 |
| S  | -0.665514 | 4.530430  | 0.002360  |
| C  | 0.786454  | 5.504056  | 0.024173  |
| C  | 1.892174  | 4.728602  | 0.021064  |
| N  | 1.621074  | 3.378542  | 0.001980  |
| N  | 0.511337  | -0.381426 | -0.038244 |
| C  | 1.386106  | -1.503597 | -0.034063 |
| C  | 1.770753  | -2.065394 | -1.257760 |
| C  | 2.585312  | -3.196995 | -1.229893 |
| C  | 2.992496  | -3.754995 | -0.023044 |
| C  | 2.577421  | -3.191118 | 1.178401  |
| C  | 1.761571  | -2.060423 | 1.195051  |
| C  | 1.330923  | -1.455814 | -2.550255 |
| C  | 1.309438  | -1.447293 | 2.481705  |
| Pd | -1.571527 | -0.621840 | -0.040329 |
| Br | -1.579601 | -3.106583 | -0.046765 |
| C  | -1.451785 | 1.398048  | -0.031160 |
| N  | -2.283414 | 2.350207  | -0.026102 |
| C  | -3.677164 | 2.236133  | -0.021053 |
| C  | -4.370213 | 2.247681  | -1.243477 |
| C  | -5.764482 | 2.241947  | -1.213379 |
| C  | -6.457262 | 2.231712  | -0.006973 |
| C  | -5.752622 | 2.216785  | 1.192583  |
| C  | -4.358041 | 2.219464  | 1.208431  |
| C  | -3.618685 | 2.239262  | -2.538423 |
| C  | -3.591498 | 2.174635  | 2.493575  |

|           |           |           |           |
|-----------|-----------|-----------|-----------|
| C         | -3.528483 | -0.800139 | -0.031121 |
| N         | -4.640503 | -1.155963 | -0.012949 |
| C         | -5.942085 | -1.619275 | 0.036284  |
| C         | -6.535393 | -1.782935 | 1.296469  |
| C         | -7.842231 | -2.262392 | 1.321475  |
| C         | -8.517163 | -2.554748 | 0.140685  |
| C         | -7.899076 | -2.371714 | -1.092275 |
| C         | -6.592813 | -1.897390 | -1.173659 |
| C         | -5.781278 | -1.435808 | 2.539517  |
| C         | -5.896134 | -1.676825 | -2.477328 |
| H         | 7.423277  | -3.567223 | 2.268768  |
| H         | 8.295321  | -4.541531 | 0.162435  |
| H         | 7.528947  | -3.674515 | -2.031923 |
| H         | 5.779726  | -0.470661 | 2.566022  |
| H         | 6.040551  | -2.004829 | 3.424450  |
| H         | 4.497937  | -1.681925 | 2.600662  |
| H         | 4.623824  | -1.812714 | -2.599773 |
| H         | 6.204371  | -2.175882 | -3.331071 |
| H         | 5.904400  | -0.600371 | -2.564813 |
| H         | 0.724287  | 6.586101  | 0.037905  |
| H         | 2.930758  | 5.043680  | 0.031190  |
| H         | 2.896446  | -3.646227 | -2.173996 |
| H         | 3.638918  | -4.632544 | -0.018756 |
| H         | 2.882904  | -3.635542 | 2.126606  |
| H         | 1.770397  | -0.457710 | -2.701736 |
| H         | 0.238435  | -1.328957 | -2.580877 |
| H         | 1.625726  | -2.082752 | -3.400578 |
| H         | 0.216645  | -1.320064 | 2.501024  |
| H         | 1.747232  | -0.448769 | 2.635127  |
| H         | 1.595216  | -2.072395 | 3.336453  |
| H         | -6.310030 | 2.251624  | -2.158064 |
| H         | -7.545998 | 2.231463  | -0.001515 |
| H         | -6.288631 | 2.206445  | 2.142905  |
| H         | -2.861260 | 3.035354  | -2.575661 |
| H         | -4.299602 | 2.373185  | -3.387694 |
| H         | -3.080869 | 1.290594  | -2.687795 |
| H         | -3.036865 | 1.229258  | 2.599626  |
| H         | -4.262805 | 2.267572  | 3.356015  |
| H         | -2.844714 | 2.979818  | 2.551090  |
| H         | -8.331921 | -2.404076 | 2.284444  |
| H         | -9.538736 | -2.928428 | 0.181455  |
| H         | -8.434693 | -2.599707 | -2.013251 |
| H         | -4.837353 | -1.995699 | 2.611427  |
| H         | -6.375840 | -1.655106 | 3.433164  |
| H         | -5.518566 | -0.365889 | 2.555283  |
| H         | -5.616039 | -0.619625 | -2.601772 |
| H         | -6.537082 | -1.960314 | -3.319461 |
| H         | -4.966503 | -2.260442 | -2.544177 |
| <hr/>     |           |           |           |
| <b>5b</b> |           |           |           |
| C         | 5.891534  | -2.480243 | -1.255643 |
| C         | 5.469044  | -2.021440 | 0.000483  |
| C         | 5.923344  | -2.548901 | 1.217061  |

|    |           |           |           |
|----|-----------|-----------|-----------|
| C  | 6.816199  | -3.614764 | 1.147114  |
| C  | 7.238230  | -4.113484 | -0.081092 |
| C  | 6.784302  | -3.548126 | -1.268334 |
| N  | 4.551848  | -0.986929 | 0.036872  |
| C  | 3.786471  | -0.107402 | 0.038499  |
| Pd | 2.767485  | 1.556550  | 0.036049  |
| I  | 5.201570  | 2.762912  | -0.074715 |
| C  | 5.456429  | -1.979393 | 2.517170  |
| C  | 5.395941  | -1.837269 | -2.509819 |
| C  | 0.865148  | 0.786689  | 0.059775  |
| N  | -0.104434 | 1.798049  | 0.058822  |
| C  | 0.356282  | 3.096461  | 0.055666  |
| S  | -0.589414 | 4.540914  | 0.063153  |
| C  | 0.895175  | 5.461554  | 0.058909  |
| C  | 1.972397  | 4.647230  | 0.049619  |
| N  | 1.656420  | 3.305525  | 0.047119  |
| N  | 0.388617  | -0.411308 | 0.054673  |
| C  | 1.209634  | -1.574705 | 0.034128  |
| C  | 1.556044  | -2.129700 | -1.205152 |
| C  | 2.288143  | -3.316647 | -1.207004 |
| C  | 2.652756  | -3.933656 | -0.015604 |
| C  | 2.287422  | -3.367303 | 1.200702  |
| C  | 1.557793  | -2.179560 | 1.248878  |
| C  | 1.158898  | -1.461263 | -2.482881 |
| C  | 1.165021  | -1.560826 | 2.552364  |
| Pd | -1.708135 | -0.568320 | 0.032474  |
| I  | -1.937775 | -3.324312 | 0.016553  |
| C  | -1.496638 | 1.451781  | 0.043238  |
| N  | -2.290681 | 2.433483  | 0.035508  |
| C  | -3.688647 | 2.370213  | 0.017103  |
| C  | -4.357848 | 2.390274  | -1.218177 |
| C  | -5.751957 | 2.363291  | -1.212086 |
| C  | -6.465043 | 2.334543  | -0.018668 |
| C  | -5.782786 | 2.344882  | 1.192946  |
| C  | -4.389235 | 2.369262  | 1.234537  |
| C  | -3.584131 | 2.396623  | -2.500153 |
| C  | -3.649453 | 2.350011  | 2.535966  |
| C  | -3.677330 | -0.617711 | 0.000368  |
| N  | -4.827631 | -0.815472 | -0.025552 |
| C  | -6.192550 | -1.033134 | -0.052753 |
| C  | -6.868451 | -1.136777 | 1.170936  |
| C  | -8.251733 | -1.285521 | 1.117371  |
| C  | -8.917185 | -1.339167 | -0.103341 |
| C  | -8.208617 | -1.268630 | -1.298583 |
| C  | -6.824368 | -1.118935 | -1.301314 |
| C  | -6.116924 | -1.079777 | 2.460969  |
| C  | -6.028672 | -1.044716 | -2.563581 |
| H  | 7.186270  | -4.051216 | 2.074066  |
| H  | 7.935465  | -4.948778 | -0.113277 |
| H  | 7.130475  | -3.932521 | -2.227009 |
| H  | 5.707297  | -0.912045 | 2.600892  |
| H  | 5.916046  | -2.503915 | 3.361981  |

|   |           |           |           |
|---|-----------|-----------|-----------|
| H | 4.363627  | -2.054810 | 2.619140  |
| H | 4.300918  | -1.905588 | -2.591482 |
| H | 5.834306  | -2.313872 | -3.393398 |
| H | 5.648681  | -0.767344 | -2.538524 |
| H | 0.872056  | 6.545271  | 0.060847  |
| H | 3.019072  | 4.934118  | 0.042954  |
| H | 2.566468  | -3.763295 | -2.162281 |
| H | 3.230954  | -4.856946 | -0.034802 |
| H | 2.562797  | -3.855229 | 2.136447  |
| H | 1.649186  | -0.482583 | -2.602145 |
| H | 0.074269  | -1.275421 | -2.520466 |
| H | 1.427273  | -2.078941 | -3.348422 |
| H | 0.079929  | -1.381814 | 2.603514  |
| H | 1.650721  | -0.584321 | 2.702771  |
| H | 1.442318  | -2.207204 | 3.393722  |
| H | -6.282212 | 2.362706  | -2.165816 |
| H | -7.553877 | 2.293522  | -0.033236 |
| H | -6.337207 | 2.331319  | 2.132689  |
| H | -2.827991 | 3.194700  | -2.515424 |
| H | -4.249622 | 2.539703  | -3.360227 |
| H | -3.040084 | 1.451353  | -2.650870 |
| H | -3.117300 | 1.397889  | 2.686318  |
| H | -4.336699 | 2.484693  | 3.380087  |
| H | -2.888386 | 3.142030  | 2.583575  |
| H | -8.808237 | -1.362226 | 2.050864  |
| H | -9.999654 | -1.451941 | -0.123831 |
| H | -8.731628 | -1.333521 | -2.252135 |
| H | -5.334704 | -1.851582 | 2.503057  |
| H | -6.789400 | -1.227283 | 3.313002  |
| H | -5.612240 | -0.109941 | 2.587100  |
| H | -5.519388 | -0.074023 | -2.659238 |
| H | -6.671179 | -1.179450 | -3.440546 |
| H | -5.245702 | -1.816507 | -2.589598 |

---
