# Supplementary material
Source: MDPI journal article supplement (https://www.mdpi.com/2304-6740/11/6/255)
Supplement: s1 [file s1]

Archive with 5 entries (5 files):
- check/checkcif_asm217.pdf
- check/checkcif_asm226.pdf
- cif/asm217.cif
- cif/asm226.cif
- ESI.pdf
