# Supplementary material
Source: MDPI journal article supplement (https://www.mdpi.com/2304-6740/11/6/255)
Supplement: s1 [file s1 › cif/asm217.cif]

data_asm217
_audit_creation_date               2023-05-20
_audit_creation_method
;
Olex2 1.5
(compiled 2022.04.07 svn.rca3783a0 for OlexSys, GUI svn.r6498)
;
_shelx_SHELXL_version_number       '2018/3'
_audit_contact_author_address      ?
_audit_contact_author_email        ?
_audit_contact_author_name         ''
_audit_contact_author_phone        ?
_publ_contact_author_id_orcid      ?
_publ_section_references
;
Dolomanov, O.V., Bourhis, L.J., Gildea, R.J, Howard, J.A.K. & Puschmann, H.
 (2009), J. Appl. Cryst. 42, 339-341.

Sheldrick, G.M. (2015). Acta Cryst. A71, 3-8.

Sheldrick, G.M. (2015). Acta Cryst. C71, 3-8.
;
_chemical_name_common              ?
_chemical_name_systematic          ?
_chemical_formula_moiety           'C39 H38 I2 N6 Pd2 S'
_chemical_formula_sum              'C39 H38 I2 N6 Pd2 S'
_chemical_formula_weight           1089.41
_chemical_melting_point            ?
_chemical_oxdiff_formula           'C39 H38 Pd2 I2 N6 S'
loop_
  _atom_type_symbol
  _atom_type_description
  _atom_type_scat_dispersion_real
  _atom_type_scat_dispersion_imag
  _atom_type_scat_source
 'C' 'C' 0.0033 0.0016 'International Tables Vol C Tables 4.2.6.8 and 6.1.1.4'
 'H' 'H' 0.0000 0.0000 'International Tables Vol C Tables 4.2.6.8 and 6.1.1.4'
 'I' 'I' -0.4742 1.8119 'International Tables Vol C Tables 4.2.6.8 and 6.1.1.4'
 'N' 'N' 0.0061 0.0033 'International Tables Vol C Tables 4.2.6.8 and 6.1.1.4'
 'Pd' 'Pd' -0.9988 1.0072
 'International Tables Vol C Tables 4.2.6.8 and 6.1.1.4'
 'S' 'S' 0.1246 0.1234 'International Tables Vol C Tables 4.2.6.8 and 6.1.1.4'

_shelx_space_group_comment
;
The symmetry employed for this shelxl refinement is uniquely defined
by the following loop, which should always be used as a source of
symmetry information in preference to the above space-group names.
They are only intended as comments.
;
_space_group_crystal_system        'monoclinic'
_space_group_IT_number             14
_space_group_name_H-M_alt          'P 1 21/c 1'
_space_group_name_Hall             '-P 2ybc'
loop_
  _space_group_symop_operation_xyz
 'x, y, z'
 '-x, y+1/2, -z+1/2'
 '-x, -y, -z'
 'x, -y-1/2, z-1/2'

_cell_length_a                     16.6540(4)
_cell_length_b                     16.7752(3)
_cell_length_c                     15.3610(3)
_cell_angle_alpha                  90
_cell_angle_beta                   111.854(3)
_cell_angle_gamma                  90
_cell_volume                       3983.08(17)
_cell_formula_units_Z              4
_cell_measurement_reflns_used      8568
_cell_measurement_temperature      100.01(10)
_cell_measurement_theta_max        30.8860
_cell_measurement_theta_min        2.8240
_shelx_estimated_absorpt_T_max     ?
_shelx_estimated_absorpt_T_min     ?
_exptl_absorpt_coefficient_mu      2.541
_exptl_absorpt_correction_t_max    1.00000
_exptl_absorpt_correction_t_min    0.87516
_exptl_absorpt_correction_type     multi-scan
_exptl_absorpt_process_details
;
CrysAlisPro, Agilent Technologies,
Version 1.171.36.32 (release 02-08-2013 CrysAlis171 .NET)
(compiled Aug  2 2013,16:46:58)
Empirical absorption correction using spherical harmonics,
 implemented in SCALE3 ABSPACK scaling algorithm.
;
_exptl_absorpt_special_details     ?
_exptl_crystal_colour              'clear yellow'
_exptl_crystal_colour_lustre       clear
_exptl_crystal_colour_modifier     .
_exptl_crystal_colour_primary      yellow
_exptl_crystal_density_diffrn      1.817
_exptl_crystal_density_meas        ?
_exptl_crystal_density_method      ?
_exptl_crystal_description         prism
_exptl_crystal_F_000               2112
_exptl_crystal_size_max            0.3
_exptl_crystal_size_mid            0.25
_exptl_crystal_size_min            0.25
_exptl_transmission_factor_max     ?
_exptl_transmission_factor_min     ?
_diffrn_reflns_av_R_equivalents    0.0284
_diffrn_reflns_av_unetI/netI       0.0369
_diffrn_reflns_Laue_measured_fraction_full  0.998
_diffrn_reflns_Laue_measured_fraction_max  0.999
_diffrn_reflns_limit_h_max         21
_diffrn_reflns_limit_h_min         -21
_diffrn_reflns_limit_k_max         21
_diffrn_reflns_limit_k_min         -21
_diffrn_reflns_limit_l_max         19
_diffrn_reflns_limit_l_min         -18
_diffrn_reflns_number              23322
_diffrn_reflns_point_group_measured_fraction_full  0.998
_diffrn_reflns_point_group_measured_fraction_max  0.999
_diffrn_reflns_theta_full          25.242
_diffrn_reflns_theta_max           27.500
_diffrn_reflns_theta_min           2.818
_diffrn_ambient_temperature        100.01(10)
_diffrn_detector_area_resol_mean   16.2096
_diffrn_measured_fraction_theta_full  0.998
_diffrn_measured_fraction_theta_max  0.999
_diffrn_measurement_details
;
  1 omega  -98.00  -72.00   1.0000    3.0000
omega____ theta____ kappa____ phi______ frames
    -      -22.5593 -178.0000 -180.0000 26

  2 omega  -42.00   42.00   1.0000    3.0000
omega____ theta____ kappa____ phi______ frames
    -      -22.5593   57.0000   30.0000 84

  3 omega  -91.00   -1.00   1.0000    3.0000
omega____ theta____ kappa____ phi______ frames
    -      -22.5593  -57.0000  150.0000 90

  4 omega  -33.00   -7.00   1.0000    3.0000
omega____ theta____ kappa____ phi______ frames
    -      -22.5593  -57.0000  -90.0000 26

  5 omega  -59.00  -15.00   1.0000    3.0000
omega____ theta____ kappa____ phi______ frames
    -      -22.5593   19.0000  -30.0000 44

  6 omega  -22.00   10.00   1.0000    3.0000
omega____ theta____ kappa____ phi______ frames
    -      -22.5593  -88.0000 -177.0000 32
;
_diffrn_measurement_device_type    'Xcalibur, Eos'
_diffrn_measurement_method         '\w scans'
_diffrn_orient_matrix_ub_11        0.0304868000
_diffrn_orient_matrix_ub_12        -0.0182686000
_diffrn_orient_matrix_ub_13        0.0404829000
_diffrn_orient_matrix_ub_21        -0.0275577000
_diffrn_orient_matrix_ub_22        -0.0335680000
_diffrn_orient_matrix_ub_23        -0.0068487000
_diffrn_orient_matrix_ub_31        0.0203761000
_diffrn_orient_matrix_ub_32        -0.0181127000
_diffrn_orient_matrix_ub_33        -0.0281147000
_diffrn_radiation_monochromator    graphite
_diffrn_radiation_type             MoK\a
_diffrn_radiation_wavelength       0.71073
_diffrn_source                     'Enhance (Mo) X-ray Source'
_reflns_Friedel_coverage           0.000
_reflns_Friedel_fraction_full      .
_reflns_Friedel_fraction_max       .
_reflns_number_gt                  7884
_reflns_number_total               9143
_reflns_special_details
;
 Reflections were merged by SHELXL according to the crystal
 class for the calculation of statistics and refinement.
 
 _reflns_Friedel_fraction is defined as the number of unique
 Friedel pairs measured divided by the number that would be
 possible theoretically, ignoring centric projections and
 systematic absences.
;
_reflns_threshold_expression       'I > 2\s(I)'
_computing_cell_refinement
;
CrysAlisPro, Agilent Technologies,
Version 1.171.36.32 (release 02-08-2013 CrysAlis171 .NET)
(compiled Aug  2 2013,16:46:58)
;
_computing_data_collection
;
CrysAlisPro, Agilent Technologies,
Version 1.171.36.32 (release 02-08-2013 CrysAlis171 .NET)
(compiled Aug  2 2013,16:46:58)
;
_computing_data_reduction
;
CrysAlisPro, Agilent Technologies,
Version 1.171.36.32 (release 02-08-2013 CrysAlis171 .NET)
(compiled Aug  2 2013,16:46:58)
;
_computing_molecular_graphics      'Olex2 1.5 (Dolomanov et al., 2009)'
_computing_publication_material    'Olex2 1.5 (Dolomanov et al., 2009)'
_computing_structure_refinement    'SHELXL 2018/3 (Sheldrick, 2015)'
_computing_structure_solution
;
Superflip (Palatinus & Chapuis, 2007;Palatinus & van der Lee, 2008;
Palatinus et al., 2012)
;
_refine_diff_density_max           0.979
_refine_diff_density_min           -1.475
_refine_diff_density_rms           0.117
_refine_ls_extinction_coef         .
_refine_ls_extinction_method       none
_refine_ls_goodness_of_fit_ref     1.064
_refine_ls_hydrogen_treatment      constr
_refine_ls_matrix_type             full
_refine_ls_number_parameters       459
_refine_ls_number_reflns           9143
_refine_ls_number_restraints       0
_refine_ls_R_factor_all            0.0373
_refine_ls_R_factor_gt             0.0287
_refine_ls_restrained_S_all        1.064
_refine_ls_shift/su_max            0.002
_refine_ls_shift/su_mean           0.000
_refine_ls_structure_factor_coef   Fsqd
_refine_ls_weighting_details      
 'w=1/[\s^2^(Fo^2^)+(0.0213P)^2^+7.4430P] where P=(Fo^2^+2Fc^2^)/3'
_refine_ls_weighting_scheme        calc
_refine_ls_wR_factor_gt            0.0629
_refine_ls_wR_factor_ref           0.0673
_refine_special_details            ?
_olex2_refinement_description
;
1.a Aromatic/amide H refined with riding coordinates:
 C7(H7), C23(H23), C38(H38), C24(H24), C25(H25), C32(H32), C33(H33), C8(H8),
 C31(H31), C39(H39), C15(H15), C9(H9), C16(H16), C17(H17)
1.b Idealised Me refined as rotating group:
 C11(H11A,H11B,H11C), C19(H19A,H19B,H19C), C35(H35A,H35B,H35C), C36(H36A,H36B,
 H36C), C27(H27A,H27B,H27C), C12(H12A,H12B,H12C), C28(H28A,H28B,H28C), C20(H20A,
 H20B,H20C)
;
_atom_sites_solution_hydrogens     geom
_atom_sites_solution_primary       dual
_atom_sites_solution_secondary     ?
loop_
  _atom_site_label
  _atom_site_type_symbol
  _atom_site_fract_x
  _atom_site_fract_y
  _atom_site_fract_z
  _atom_site_U_iso_or_equiv
  _atom_site_adp_type
  _atom_site_occupancy
  _atom_site_site_symmetry_order
  _atom_site_calc_flag
  _atom_site_refinement_flags_posn
  _atom_site_refinement_flags_adp
  _atom_site_refinement_flags_occupancy
  _atom_site_disorder_assembly
  _atom_site_disorder_group
 I1 I 0.52565(2) 0.54840(2) 0.70806(2) 0.02149(6) Uani 1 1 d . . . . .
 I2 I 0.86700(2) 0.97402(2) 0.70170(2) 0.02535(6) Uani 1 1 d . . . . .
 Pd1 Pd 0.65715(2) 0.64475(2) 0.72709(2) 0.01229(6) Uani 1 1 d . . . . .
 Pd2 Pd 0.89470(2) 0.83735(2) 0.79525(2) 0.01257(6) Uani 1 1 d . . . . .
 S1 S 0.89837(6) 0.56381(6) 0.95641(6) 0.0264(2) Uani 1 1 d . . . . .
 N3 N 0.77350(17) 0.78846(16) 0.72875(17) 0.0135(5) Uani 1 1 d . . . . .
 N2 N 0.83220(18) 0.69050(17) 0.83369(18) 0.0156(6) Uani 1 1 d . . . . .
 N1 N 0.74741(18) 0.58023(17) 0.82927(18) 0.0165(6) Uani 1 1 d . . . . .
 N4 N 0.96738(19) 0.70699(18) 0.94274(19) 0.0198(6) Uani 1 1 d . . . . .
 C1 C 0.7600(2) 0.7198(2) 0.7585(2) 0.0137(6) Uani 1 1 d . . . . .
 N5 N 0.51722(18) 0.73442(17) 0.56644(19) 0.0187(6) Uani 1 1 d . . . . .
 C13 C 0.7094(2) 0.8276(2) 0.6508(2) 0.0143(6) Uani 1 1 d . . . . .
 N6 N 1.08005(18) 0.90599(18) 0.87170(19) 0.0193(6) Uani 1 1 d . . . . .
 C3 C 0.5730(2) 0.7058(2) 0.6274(2) 0.0156(7) Uani 1 1 d . . . . .
 C2 C 0.9105(2) 0.7371(2) 0.8712(2) 0.0166(7) Uani 1 1 d . . . . .
 C29 C 1.1626(2) 0.9393(2) 0.8940(2) 0.0194(7) Uani 1 1 d . . . . .
 C4 C 1.0131(2) 0.8773(2) 0.8514(2) 0.0179(7) Uani 1 1 d . . . . .
 C37 C 0.8226(2) 0.6161(2) 0.8682(2) 0.0168(7) Uani 1 1 d . . . . .
 C14 C 0.6566(2) 0.8850(2) 0.6687(2) 0.0189(7) Uani 1 1 d . . . . .
 C11 C 0.4093(3) 0.8481(3) 0.6086(3) 0.0368(11) Uani 1 1 d . . . . .
 H11A H 0.469660 0.842777 0.651620 0.055 Uiso 1 1 calc R U . . .
 H11B H 0.373281 0.810285 0.626483 0.055 Uiso 1 1 calc R U . . .
 H11C H 0.389278 0.902514 0.611719 0.055 Uiso 1 1 calc R U . . .
 C26 C 1.1163(2) 0.7264(2) 0.9569(2) 0.0205(7) Uani 1 1 d . . . . .
 C6 C 0.4028(2) 0.8305(2) 0.5101(2) 0.0198(7) Uani 1 1 d . . . . .
 C7 C 0.3451(2) 0.8726(2) 0.4341(3) 0.0234(8) Uani 1 1 d . . . . .
 H7 H 0.308577 0.912069 0.444137 0.028 Uiso 1 1 calc R U . . .
 C21 C 1.0501(2) 0.7423(2) 0.9897(2) 0.0191(7) Uani 1 1 d . . . . .
 C5 C 0.4540(2) 0.7731(2) 0.4907(2) 0.0170(7) Uani 1 1 d . . . . .
 C19 C 0.6633(3) 0.9023(3) 0.7667(3) 0.0330(9) Uani 1 1 d . . . . .
 H19A H 0.651548 0.853503 0.795085 0.049 Uiso 1 1 calc R U . . .
 H19B H 0.620989 0.943278 0.765538 0.049 Uiso 1 1 calc R U . . .
 H19C H 0.721711 0.921312 0.803769 0.049 Uiso 1 1 calc R U . . .
 C23 C 1.1462(2) 0.8216(2) 1.1156(2) 0.0245(8) Uani 1 1 d . . . . .
 H23 H 1.156829 0.853926 1.169496 0.029 Uiso 1 1 calc R U . . .
 C38 C 0.8244(3) 0.4867(2) 0.9369(3) 0.0308(9) Uani 1 1 d . . . . .
 H38 H 0.835696 0.437600 0.970094 0.037 Uiso 1 1 calc R U . . .
 C22 C 1.0641(2) 0.7884(2) 1.0704(2) 0.0212(7) Uani 1 1 d . . . . .
 C24 C 1.2122(2) 0.8084(2) 1.0835(2) 0.0240(8) Uani 1 1 d . . . . .
 H24 H 1.267360 0.831966 1.114811 0.029 Uiso 1 1 calc R U . . .
 C25 C 1.1979(2) 0.7605(2) 1.0050(2) 0.0234(8) Uani 1 1 d . . . . .
 H25 H 1.243784 0.750773 0.983822 0.028 Uiso 1 1 calc R U . . .
 C32 C 1.3262(2) 0.9999(3) 0.9424(3) 0.0319(9) Uani 1 1 d . . . . .
 H32 H 1.383221 1.020337 0.959822 0.038 Uiso 1 1 calc R U . . .
 C33 C 1.2957(3) 0.9443(3) 0.8708(3) 0.0310(9) Uani 1 1 d . . . . .
 H33 H 1.332022 0.927606 0.839084 0.037 Uiso 1 1 calc R U . . .
 C35 C 1.1319(3) 1.0227(2) 1.0152(3) 0.0331(9) Uani 1 1 d . . . . .
 H35A H 1.073128 1.031194 0.969367 0.050 Uiso 1 1 calc R U . . .
 H35B H 1.153885 1.072487 1.049038 0.050 Uiso 1 1 calc R U . . .
 H35C H 1.130825 0.981331 1.059866 0.050 Uiso 1 1 calc R U . . .
 C8 C 0.3409(3) 0.8569(2) 0.3438(3) 0.0300(9) Uani 1 1 d . . . . .
 H8 H 0.303224 0.887225 0.292691 0.036 Uiso 1 1 calc R U . . .
 C30 C 1.1898(2) 0.9966(2) 0.9652(2) 0.0225(8) Uani 1 1 d . . . . .
 C36 C 1.1786(3) 0.8525(3) 0.7669(3) 0.0390(11) Uani 1 1 d . . . . .
 H36A H 1.160733 0.804338 0.790888 0.059 Uiso 1 1 calc R U . . .
 H36B H 1.223870 0.838958 0.742966 0.059 Uiso 1 1 calc R U . . .
 H36C H 1.128792 0.875214 0.716112 0.059 Uiso 1 1 calc R U . . .
 C31 C 1.2735(3) 1.0259(2) 0.9885(3) 0.0284(9) Uani 1 1 d . . . . .
 H31 H 1.295001 1.064417 1.036945 0.034 Uiso 1 1 calc R U . . .
 C18 C 0.7069(2) 0.8126(2) 0.5603(2) 0.0179(7) Uani 1 1 d . . . . .
 C34 C 1.2132(2) 0.9125(2) 0.8446(2) 0.0252(8) Uani 1 1 d . . . . .
 C27 C 0.9929(3) 0.8020(3) 1.1065(3) 0.0316(9) Uani 1 1 d . . . . .
 H27A H 0.940553 0.819460 1.054900 0.047 Uiso 1 1 calc R U . . .
 H27B H 1.010752 0.843111 1.155318 0.047 Uiso 1 1 calc R U . . .
 H27C H 0.981018 0.752229 1.132916 0.047 Uiso 1 1 calc R U . . .
 C12 C 0.5063(3) 0.6907(3) 0.3847(3) 0.0541(15) Uani 1 1 d . . . . .
 H12A H 0.567058 0.706230 0.415509 0.081 Uiso 1 1 calc R U . . .
 H12B H 0.492424 0.684436 0.317220 0.081 Uiso 1 1 calc R U . . .
 H12C H 0.496400 0.640043 0.410951 0.081 Uiso 1 1 calc R U . . .
 C28 C 1.0986(3) 0.6770(2) 0.8704(3) 0.0301(9) Uani 1 1 d . . . . .
 H28A H 1.068459 0.628046 0.875345 0.045 Uiso 1 1 calc R U . . .
 H28B H 1.153343 0.663381 0.864117 0.045 Uiso 1 1 calc R U . . .
 H28C H 1.062263 0.707383 0.815329 0.045 Uiso 1 1 calc R U . . .
 C20 C 0.7674(3) 0.7531(3) 0.5439(3) 0.0308(9) Uani 1 1 d . . . . .
 H20A H 0.827004 0.772479 0.572797 0.046 Uiso 1 1 calc R U . . .
 H20B H 0.752454 0.746337 0.476294 0.046 Uiso 1 1 calc R U . . .
 H20C H 0.762062 0.701871 0.571835 0.046 Uiso 1 1 calc R U . . .
 C10 C 0.4494(3) 0.7540(2) 0.4006(2) 0.0277(9) Uani 1 1 d . . . . .
 C39 C 0.7485(2) 0.5059(2) 0.8682(2) 0.0243(8) Uani 1 1 d . . . . .
 H39 H 0.699905 0.471194 0.848343 0.029 Uiso 1 1 calc R U . . .
 C15 C 0.5996(2) 0.9277(2) 0.5926(3) 0.0280(9) Uani 1 1 d . . . . .
 H15 H 0.563015 0.967113 0.602754 0.034 Uiso 1 1 calc R U . . .
 C9 C 0.3910(3) 0.7977(3) 0.3276(3) 0.0338(10) Uani 1 1 d . . . . .
 H9 H 0.385448 0.786488 0.265006 0.041 Uiso 1 1 calc R U . . .
 C16 C 0.5961(2) 0.9131(3) 0.5025(3) 0.0327(10) Uani 1 1 d . . . . .
 H16 H 0.557102 0.942534 0.451398 0.039 Uiso 1 1 calc R U . . .
 C17 C 0.6484(2) 0.8564(3) 0.4865(2) 0.0275(9) Uani 1 1 d . . . . .
 H17 H 0.644698 0.846762 0.424218 0.033 Uiso 1 1 calc R U . . .

loop_
  _atom_site_aniso_label
  _atom_site_aniso_U_11
  _atom_site_aniso_U_22
  _atom_site_aniso_U_33
  _atom_site_aniso_U_23
  _atom_site_aniso_U_13
  _atom_site_aniso_U_12
 I1 0.01706(11) 0.02166(12) 0.02375(12) 0.00206(9) 0.00526(9) -0.00619(10)
 I2 0.02158(12) 0.01932(12) 0.03060(13) 0.00927(9) 0.00446(9) -0.00136(10)
 Pd1 0.01101(12) 0.01221(12) 0.01114(11) 0.00141(9) 0.00122(9) -0.00139(10)
 Pd2 0.01054(12) 0.01188(12) 0.01339(11) 0.00109(9) 0.00225(9) -0.00100(10)
 S1 0.0225(5) 0.0210(5) 0.0232(4) 0.0104(4) -0.0060(3) -0.0027(4)
 N3 0.0094(12) 0.0157(14) 0.0137(13) 0.0035(10) 0.0023(10) 0.0012(11)
 N2 0.0135(13) 0.0143(14) 0.0136(13) 0.0019(11) -0.0012(10) -0.0017(12)
 N1 0.0173(14) 0.0141(14) 0.0144(13) 0.0021(11) 0.0018(11) -0.0030(12)
 N4 0.0171(15) 0.0178(15) 0.0177(14) 0.0047(11) -0.0015(11) -0.0028(13)
 C1 0.0118(15) 0.0177(17) 0.0095(14) 0.0032(12) 0.0014(11) 0.0006(13)
 N5 0.0153(14) 0.0152(15) 0.0198(14) 0.0004(11) -0.0001(11) -0.0043(12)
 C13 0.0091(14) 0.0129(16) 0.0192(16) 0.0033(12) 0.0034(12) -0.0011(13)
 N6 0.0133(14) 0.0184(15) 0.0225(15) 0.0014(12) 0.0023(11) -0.0015(13)
 C3 0.0144(16) 0.0139(16) 0.0186(16) -0.0033(13) 0.0062(13) -0.0031(14)
 C2 0.0157(16) 0.0157(17) 0.0161(15) -0.0009(13) 0.0031(12) -0.0027(14)
 C29 0.0114(16) 0.0213(18) 0.0220(17) 0.0032(14) 0.0023(13) -0.0047(15)
 C4 0.0217(18) 0.0154(17) 0.0156(15) 0.0005(13) 0.0056(13) -0.0005(15)
 C37 0.0191(17) 0.0153(17) 0.0126(15) 0.0022(12) 0.0019(12) -0.0013(14)
 C14 0.0131(16) 0.0123(16) 0.0297(18) -0.0018(14) 0.0063(13) -0.0028(14)
 C11 0.024(2) 0.062(3) 0.027(2) -0.0052(19) 0.0110(16) 0.008(2)
 C26 0.0198(17) 0.0158(17) 0.0191(16) 0.0051(13) -0.0005(13) 0.0040(15)
 C6 0.0123(16) 0.0226(19) 0.0227(17) -0.0004(14) 0.0044(13) -0.0044(15)
 C7 0.0109(16) 0.0196(19) 0.035(2) 0.0016(15) 0.0024(14) 0.0020(15)
 C21 0.0138(16) 0.0185(18) 0.0166(16) 0.0082(13) -0.0039(12) -0.0011(14)
 C5 0.0133(16) 0.0135(16) 0.0173(16) 0.0027(13) -0.0024(12) -0.0019(14)
 C19 0.0221(19) 0.040(3) 0.040(2) -0.0130(19) 0.0159(17) 0.0022(19)
 C23 0.0257(19) 0.025(2) 0.0175(17) 0.0022(14) 0.0017(14) -0.0044(17)
 C38 0.034(2) 0.0178(19) 0.029(2) 0.0128(16) -0.0009(16) -0.0090(18)
 C22 0.0201(18) 0.0240(19) 0.0142(16) 0.0061(13) 0.0002(13) -0.0018(16)
 C24 0.0150(17) 0.028(2) 0.0191(17) 0.0072(15) -0.0052(13) -0.0016(16)
 C25 0.0171(17) 0.0234(19) 0.0240(18) 0.0050(15) 0.0011(14) 0.0049(16)
 C32 0.0165(18) 0.048(3) 0.0250(19) 0.0052(18) 0.0003(14) -0.0112(19)
 C33 0.0213(19) 0.045(3) 0.029(2) 0.0031(18) 0.0121(16) -0.0024(19)
 C35 0.036(2) 0.025(2) 0.040(2) -0.0059(18) 0.0172(19) -0.0019(19)
 C8 0.0224(19) 0.032(2) 0.0240(19) 0.0065(16) -0.0053(15) -0.0026(18)
 C30 0.0195(18) 0.0217(19) 0.0244(18) 0.0032(14) 0.0061(14) -0.0050(16)
 C36 0.044(3) 0.044(3) 0.036(2) -0.014(2) 0.022(2) -0.015(2)
 C31 0.026(2) 0.029(2) 0.0246(19) -0.0002(16) 0.0025(15) -0.0131(18)
 C18 0.0130(15) 0.0220(18) 0.0165(16) 0.0029(13) 0.0030(12) -0.0032(15)
 C34 0.0207(18) 0.029(2) 0.0249(18) 0.0003(15) 0.0073(14) -0.0052(17)
 C27 0.025(2) 0.046(3) 0.0218(19) 0.0031(17) 0.0057(15) -0.0026(19)
 C12 0.045(3) 0.062(3) 0.035(2) -0.027(2) -0.009(2) 0.023(3)
 C28 0.028(2) 0.025(2) 0.033(2) -0.0050(16) 0.0055(16) 0.0029(18)
 C20 0.025(2) 0.048(3) 0.0191(18) -0.0056(17) 0.0077(15) 0.0075(19)
 C10 0.026(2) 0.027(2) 0.0208(18) -0.0071(15) -0.0027(14) 0.0052(17)
 C39 0.0233(19) 0.0146(18) 0.0266(18) 0.0051(14) -0.0002(14) -0.0088(16)
 C15 0.0121(17) 0.0149(18) 0.052(2) 0.0068(17) 0.0068(16) 0.0024(15)
 C9 0.034(2) 0.042(3) 0.0158(18) -0.0029(16) -0.0016(15) 0.007(2)
 C16 0.0149(18) 0.031(2) 0.040(2) 0.0250(18) -0.0030(16) 0.0007(17)
 C17 0.0190(18) 0.040(2) 0.0187(17) 0.0124(16) 0.0013(14) -0.0071(18)

_geom_special_details
;
 All esds (except the esd in the dihedral angle between two l.s. planes)
 are estimated using the full covariance matrix.  The cell esds are taken
 into account individually in the estimation of esds in distances, angles
 and torsion angles; correlations between esds in cell parameters are only
 used when they are defined by crystal symmetry.  An approximate (isotropic)
 treatment of cell esds is used for estimating esds involving l.s. planes.
;
loop_
  _geom_bond_atom_site_label_1
  _geom_bond_atom_site_label_2
  _geom_bond_distance
  _geom_bond_site_symmetry_2
  _geom_bond_publ_flag
 I1 Pd1 2.6490(3) . ?
 I2 Pd2 2.6535(3) . ?
 Pd1 N1 2.034(3) . ?
 Pd1 C1 2.034(3) . ?
 Pd1 C3 1.939(3) . ?
 Pd2 N3 2.063(3) . ?
 Pd2 C2 2.007(3) . ?
 Pd2 C4 1.953(4) . ?
 S1 C37 1.711(3) . ?
 S1 C38 1.734(4) . ?
 N3 C1 1.290(4) . ?
 N3 C13 1.433(4) . ?
 N2 C1 1.409(4) . ?
 N2 C2 1.444(4) . ?
 N2 C37 1.388(4) . ?
 N1 C37 1.315(4) . ?
 N1 C39 1.380(4) . ?
 N4 C2 1.259(4) . ?
 N4 C21 1.425(4) . ?
 N5 C3 1.150(4) . ?
 N5 C5 1.404(4) . ?
 C13 C14 1.397(5) . ?
 C13 C18 1.399(4) . ?
 N6 C29 1.403(4) . ?
 N6 C4 1.146(4) . ?
 C29 C30 1.400(5) . ?
 C29 C34 1.401(5) . ?
 C14 C19 1.497(5) . ?
 C14 C15 1.398(5) . ?
 C11 H11A 0.9800 . ?
 C11 H11B 0.9800 . ?
 C11 H11C 0.9800 . ?
 C11 C6 1.504(5) . ?
 C26 C21 1.398(5) . ?
 C26 C25 1.404(5) . ?
 C26 C28 1.498(5) . ?
 C6 C7 1.396(5) . ?
 C6 C5 1.390(5) . ?
 C7 H7 0.9500 . ?
 C7 C8 1.388(5) . ?
 C21 C22 1.404(5) . ?
 C5 C10 1.395(5) . ?
 C19 H19A 0.9800 . ?
 C19 H19B 0.9800 . ?
 C19 H19C 0.9800 . ?
 C23 H23 0.9500 . ?
 C23 C22 1.399(5) . ?
 C23 C24 1.379(5) . ?
 C38 H38 0.9500 . ?
 C38 C39 1.350(5) . ?
 C22 C27 1.501(5) . ?
 C24 H24 0.9500 . ?
 C24 C25 1.393(5) . ?
 C25 H25 0.9500 . ?
 C32 H32 0.9500 . ?
 C32 C33 1.386(6) . ?
 C32 C31 1.386(6) . ?
 C33 H33 0.9500 . ?
 C33 C34 1.386(5) . ?
 C35 H35A 0.9800 . ?
 C35 H35B 0.9800 . ?
 C35 H35C 0.9800 . ?
 C35 C30 1.505(5) . ?
 C8 H8 0.9500 . ?
 C8 C9 1.377(6) . ?
 C30 C31 1.393(5) . ?
 C36 H36A 0.9800 . ?
 C36 H36B 0.9800 . ?
 C36 H36C 0.9800 . ?
 C36 C34 1.502(5) . ?
 C31 H31 0.9500 . ?
 C18 C20 1.504(5) . ?
 C18 C17 1.397(5) . ?
 C27 H27A 0.9800 . ?
 C27 H27B 0.9800 . ?
 C27 H27C 0.9800 . ?
 C12 H12A 0.9800 . ?
 C12 H12B 0.9800 . ?
 C12 H12C 0.9800 . ?
 C12 C10 1.503(6) . ?
 C28 H28A 0.9800 . ?
 C28 H28B 0.9800 . ?
 C28 H28C 0.9800 . ?
 C20 H20A 0.9800 . ?
 C20 H20B 0.9800 . ?
 C20 H20C 0.9800 . ?
 C10 C9 1.389(5) . ?
 C39 H39 0.9500 . ?
 C15 H15 0.9500 . ?
 C15 C16 1.384(6) . ?
 C9 H9 0.9500 . ?
 C16 H16 0.9500 . ?
 C16 C17 1.372(6) . ?
 C17 H17 0.9500 . ?

loop_
  _geom_angle_atom_site_label_1
  _geom_angle_atom_site_label_2
  _geom_angle_atom_site_label_3
  _geom_angle
  _geom_angle_site_symmetry_1
  _geom_angle_site_symmetry_3
  _geom_angle_publ_flag
 N1 Pd1 I1 95.95(8) . . ?
 C1 Pd1 I1 172.99(8) . . ?
 C1 Pd1 N1 80.27(12) . . ?
 C3 Pd1 I1 84.88(10) . . ?
 C3 Pd1 N1 178.35(12) . . ?
 C3 Pd1 C1 99.06(13) . . ?
 N3 Pd2 I2 97.73(7) . . ?
 C2 Pd2 I2 175.78(10) . . ?
 C2 Pd2 N3 81.21(12) . . ?
 C4 Pd2 I2 83.47(10) . . ?
 C4 Pd2 N3 174.86(12) . . ?
 C4 Pd2 C2 97.95(14) . . ?
 C37 S1 C38 88.77(17) . . ?
 C1 N3 Pd2 116.6(2) . . ?
 C1 N3 C13 122.1(3) . . ?
 C13 N3 Pd2 121.3(2) . . ?
 C1 N2 C2 120.4(3) . . ?
 C37 N2 C1 116.2(3) . . ?
 C37 N2 C2 123.4(3) . . ?
 C37 N1 Pd1 114.3(2) . . ?
 C37 N1 C39 111.1(3) . . ?
 C39 N1 Pd1 134.6(2) . . ?
 C2 N4 C21 123.1(3) . . ?
 N3 C1 Pd1 135.3(2) . . ?
 N3 C1 N2 113.2(3) . . ?
 N2 C1 Pd1 111.4(2) . . ?
 C3 N5 C5 175.5(3) . . ?
 C14 C13 N3 118.7(3) . . ?
 C14 C13 C18 122.1(3) . . ?
 C18 C13 N3 119.0(3) . . ?
 C4 N6 C29 177.8(4) . . ?
 N5 C3 Pd1 172.1(3) . . ?
 N2 C2 Pd2 108.6(2) . . ?
 N4 C2 Pd2 137.5(3) . . ?
 N4 C2 N2 113.9(3) . . ?
 C30 C29 N6 117.9(3) . . ?
 C30 C29 C34 124.0(3) . . ?
 C34 C29 N6 118.2(3) . . ?
 N6 C4 Pd2 169.8(3) . . ?
 N2 C37 S1 127.4(3) . . ?
 N1 C37 S1 114.9(2) . . ?
 N1 C37 N2 117.6(3) . . ?
 C13 C14 C19 120.9(3) . . ?
 C13 C14 C15 118.0(3) . . ?
 C15 C14 C19 121.0(3) . . ?
 H11A C11 H11B 109.5 . . ?
 H11A C11 H11C 109.5 . . ?
 H11B C11 H11C 109.5 . . ?
 C6 C11 H11A 109.5 . . ?
 C6 C11 H11B 109.5 . . ?
 C6 C11 H11C 109.5 . . ?
 C21 C26 C25 118.1(3) . . ?
 C21 C26 C28 120.2(3) . . ?
 C25 C26 C28 121.7(3) . . ?
 C7 C6 C11 120.8(3) . . ?
 C5 C6 C11 122.0(3) . . ?
 C5 C6 C7 117.2(3) . . ?
 C6 C7 H7 119.9 . . ?
 C8 C7 C6 120.2(3) . . ?
 C8 C7 H7 119.9 . . ?
 C26 C21 N4 118.8(3) . . ?
 C26 C21 C22 122.0(3) . . ?
 C22 C21 N4 119.2(3) . . ?
 C6 C5 N5 118.3(3) . . ?
 C6 C5 C10 124.1(3) . . ?
 C10 C5 N5 117.5(3) . . ?
 C14 C19 H19A 109.5 . . ?
 C14 C19 H19B 109.5 . . ?
 C14 C19 H19C 109.5 . . ?
 H19A C19 H19B 109.5 . . ?
 H19A C19 H19C 109.5 . . ?
 H19B C19 H19C 109.5 . . ?
 C22 C23 H23 119.3 . . ?
 C24 C23 H23 119.3 . . ?
 C24 C23 C22 121.4(3) . . ?
 S1 C38 H38 124.6 . . ?
 C39 C38 S1 110.8(3) . . ?
 C39 C38 H38 124.6 . . ?
 C21 C22 C27 121.0(3) . . ?
 C23 C22 C21 117.8(3) . . ?
 C23 C22 C27 121.1(3) . . ?
 C23 C24 H24 120.0 . . ?
 C23 C24 C25 119.9(3) . . ?
 C25 C24 H24 120.0 . . ?
 C26 C25 H25 119.6 . . ?
 C24 C25 C26 120.7(4) . . ?
 C24 C25 H25 119.6 . . ?
 C33 C32 H32 119.9 . . ?
 C31 C32 H32 119.9 . . ?
 C31 C32 C33 120.1(4) . . ?
 C32 C33 H33 119.3 . . ?
 C34 C33 C32 121.4(4) . . ?
 C34 C33 H33 119.3 . . ?
 H35A C35 H35B 109.5 . . ?
 H35A C35 H35C 109.5 . . ?
 H35B C35 H35C 109.5 . . ?
 C30 C35 H35A 109.5 . . ?
 C30 C35 H35B 109.5 . . ?
 C30 C35 H35C 109.5 . . ?
 C7 C8 H8 119.7 . . ?
 C9 C8 C7 120.6(3) . . ?
 C9 C8 H8 119.7 . . ?
 C29 C30 C35 121.1(3) . . ?
 C31 C30 C29 116.4(3) . . ?
 C31 C30 C35 122.5(4) . . ?
 H36A C36 H36B 109.5 . . ?
 H36A C36 H36C 109.5 . . ?
 H36B C36 H36C 109.5 . . ?
 C34 C36 H36A 109.5 . . ?
 C34 C36 H36B 109.5 . . ?
 C34 C36 H36C 109.5 . . ?
 C32 C31 C30 121.4(4) . . ?
 C32 C31 H31 119.3 . . ?
 C30 C31 H31 119.3 . . ?
 C13 C18 C20 120.9(3) . . ?
 C17 C18 C13 117.7(3) . . ?
 C17 C18 C20 121.4(3) . . ?
 C29 C34 C36 121.0(3) . . ?
 C33 C34 C29 116.7(3) . . ?
 C33 C34 C36 122.2(4) . . ?
 C22 C27 H27A 109.5 . . ?
 C22 C27 H27B 109.5 . . ?
 C22 C27 H27C 109.5 . . ?
 H27A C27 H27B 109.5 . . ?
 H27A C27 H27C 109.5 . . ?
 H27B C27 H27C 109.5 . . ?
 H12A C12 H12B 109.5 . . ?
 H12A C12 H12C 109.5 . . ?
 H12B C12 H12C 109.5 . . ?
 C10 C12 H12A 109.5 . . ?
 C10 C12 H12B 109.5 . . ?
 C10 C12 H12C 109.5 . . ?
 C26 C28 H28A 109.5 . . ?
 C26 C28 H28B 109.5 . . ?
 C26 C28 H28C 109.5 . . ?
 H28A C28 H28B 109.5 . . ?
 H28A C28 H28C 109.5 . . ?
 H28B C28 H28C 109.5 . . ?
 C18 C20 H20A 109.5 . . ?
 C18 C20 H20B 109.5 . . ?
 C18 C20 H20C 109.5 . . ?
 H20A C20 H20B 109.5 . . ?
 H20A C20 H20C 109.5 . . ?
 H20B C20 H20C 109.5 . . ?
 C5 C10 C12 121.3(3) . . ?
 C9 C10 C5 116.3(4) . . ?
 C9 C10 C12 122.4(4) . . ?
 N1 C39 H39 122.9 . . ?
 C38 C39 N1 114.3(3) . . ?
 C38 C39 H39 122.9 . . ?
 C14 C15 H15 119.8 . . ?
 C16 C15 C14 120.5(4) . . ?
 C16 C15 H15 119.8 . . ?
 C8 C9 C10 121.6(4) . . ?
 C8 C9 H9 119.2 . . ?
 C10 C9 H9 119.2 . . ?
 C15 C16 H16 119.7 . . ?
 C17 C16 C15 120.6(3) . . ?
 C17 C16 H16 119.7 . . ?
 C18 C17 H17 119.4 . . ?
 C16 C17 C18 121.1(3) . . ?
 C16 C17 H17 119.4 . . ?

loop_
  _geom_torsion_atom_site_label_1
  _geom_torsion_atom_site_label_2
  _geom_torsion_atom_site_label_3
  _geom_torsion_atom_site_label_4
  _geom_torsion
  _geom_torsion_site_symmetry_1
  _geom_torsion_site_symmetry_2
  _geom_torsion_site_symmetry_3
  _geom_torsion_site_symmetry_4
  _geom_torsion_publ_flag
 Pd1 N1 C37 S1 178.35(15) . . . . ?
 Pd1 N1 C37 N2 -2.2(4) . . . . ?
 Pd1 N1 C39 C38 -179.5(3) . . . . ?
 Pd2 N3 C1 Pd1 177.3(2) . . . . ?
 Pd2 N3 C1 N2 0.7(4) . . . . ?
 Pd2 N3 C13 C14 -86.3(3) . . . . ?
 Pd2 N3 C13 C18 88.0(3) . . . . ?
 S1 C38 C39 N1 0.8(5) . . . . ?
 N3 C13 C14 C19 -3.3(5) . . . . ?
 N3 C13 C14 C15 174.5(3) . . . . ?
 N3 C13 C18 C20 3.1(5) . . . . ?
 N3 C13 C18 C17 -175.0(3) . . . . ?
 N4 C21 C22 C23 179.3(3) . . . . ?
 N4 C21 C22 C27 -1.0(5) . . . . ?
 C1 N3 C13 C14 96.6(4) . . . . ?
 C1 N3 C13 C18 -89.1(4) . . . . ?
 C1 N2 C2 Pd2 -2.7(4) . . . . ?
 C1 N2 C2 N4 174.7(3) . . . . ?
 C1 N2 C37 S1 178.4(3) . . . . ?
 C1 N2 C37 N1 -1.0(4) . . . . ?
 N5 C5 C10 C12 3.7(6) . . . . ?
 N5 C5 C10 C9 -175.1(3) . . . . ?
 C13 N3 C1 Pd1 -5.5(5) . . . . ?
 C13 N3 C1 N2 178.0(3) . . . . ?
 C13 C14 C15 C16 0.1(5) . . . . ?
 C13 C18 C17 C16 1.0(5) . . . . ?
 N6 C29 C30 C35 -1.0(5) . . . . ?
 N6 C29 C30 C31 177.2(3) . . . . ?
 N6 C29 C34 C33 -177.5(3) . . . . ?
 N6 C29 C34 C36 2.9(5) . . . . ?
 C2 N2 C1 Pd1 -176.0(2) . . . . ?
 C2 N2 C1 N3 1.3(4) . . . . ?
 C2 N2 C37 S1 -2.0(5) . . . . ?
 C2 N2 C37 N1 178.6(3) . . . . ?
 C2 N4 C21 C26 -85.1(4) . . . . ?
 C2 N4 C21 C22 98.3(4) . . . . ?
 C29 C30 C31 C32 0.7(6) . . . . ?
 C37 S1 C38 C39 -1.4(3) . . . . ?
 C37 N2 C1 Pd1 3.6(3) . . . . ?
 C37 N2 C1 N3 -179.0(3) . . . . ?
 C37 N2 C2 Pd2 177.7(2) . . . . ?
 C37 N2 C2 N4 -4.9(5) . . . . ?
 C37 N1 C39 C38 0.6(5) . . . . ?
 C14 C13 C18 C20 177.2(3) . . . . ?
 C14 C13 C18 C17 -0.9(5) . . . . ?
 C14 C15 C16 C17 0.0(6) . . . . ?
 C11 C6 C7 C8 178.7(4) . . . . ?
 C11 C6 C5 N5 -4.1(5) . . . . ?
 C11 C6 C5 C10 179.1(4) . . . . ?
 C26 C21 C22 C23 2.8(5) . . . . ?
 C26 C21 C22 C27 -177.5(3) . . . . ?
 C6 C7 C8 C9 2.5(6) . . . . ?
 C6 C5 C10 C12 -179.4(4) . . . . ?
 C6 C5 C10 C9 1.8(6) . . . . ?
 C7 C6 C5 N5 175.1(3) . . . . ?
 C7 C6 C5 C10 -1.7(5) . . . . ?
 C7 C8 C9 C10 -2.5(7) . . . . ?
 C21 N4 C2 Pd2 -5.0(6) . . . . ?
 C21 N4 C2 N2 178.7(3) . . . . ?
 C21 C26 C25 C24 0.3(5) . . . . ?
 C5 C6 C7 C8 -0.5(5) . . . . ?
 C5 C10 C9 C8 0.4(6) . . . . ?
 C19 C14 C15 C16 177.8(4) . . . . ?
 C23 C24 C25 C26 1.1(5) . . . . ?
 C38 S1 C37 N2 -177.6(3) . . . . ?
 C38 S1 C37 N1 1.8(3) . . . . ?
 C22 C23 C24 C25 -0.7(6) . . . . ?
 C24 C23 C22 C21 -1.3(5) . . . . ?
 C24 C23 C22 C27 179.0(4) . . . . ?
 C25 C26 C21 N4 -178.8(3) . . . . ?
 C25 C26 C21 C22 -2.4(5) . . . . ?
 C32 C33 C34 C29 0.0(6) . . . . ?
 C32 C33 C34 C36 179.6(4) . . . . ?
 C33 C32 C31 C30 0.6(6) . . . . ?
 C35 C30 C31 C32 178.9(4) . . . . ?
 C30 C29 C34 C33 1.5(6) . . . . ?
 C30 C29 C34 C36 -178.1(4) . . . . ?
 C31 C32 C33 C34 -1.0(6) . . . . ?
 C18 C13 C14 C19 -177.4(3) . . . . ?
 C18 C13 C14 C15 0.4(5) . . . . ?
 C34 C29 C30 C35 180.0(4) . . . . ?
 C34 C29 C30 C31 -1.8(5) . . . . ?
 C12 C10 C9 C8 -178.4(4) . . . . ?
 C28 C26 C21 N4 3.6(5) . . . . ?
 C28 C26 C21 C22 -179.9(3) . . . . ?
 C28 C26 C25 C24 177.8(3) . . . . ?
 C20 C18 C17 C16 -177.1(4) . . . . ?
 C39 N1 C37 S1 -1.7(4) . . . . ?
 C39 N1 C37 N2 177.7(3) . . . . ?
 C15 C16 C17 C18 -0.6(6) . . . . ?

_shelx_res_file
;
TITL CF solution in P21/c
    asm217.res
    created by SHELXL-2018/3 at 17:26:59 on 16-May-2023
CELL 0.71073 16.653995 16.775183 15.361035 90 111.8535 90
ZERR 4 0.000392 0.000338 0.00034 0 0.0026 0
LATT 1
SYMM -X,0.5+Y,0.5-Z
SFAC C H I N Pd S
UNIT 156 152 8 24 8 4

L.S. 14
PLAN  11
TEMP -173.14(10)
CONF
BOND $H
HTAB
MORE -1
fmap 2
acta
OMIT -4 55
REM <olex2.extras>
REM <HklSrc "%.\\asm217.hkl">
REM </olex2.extras>

WGHT    0.021300    7.443000
FVAR       1.77293
I1    3    0.525655    0.548404    0.708057    11.00000    0.01706    0.02166 =
         0.02375    0.00206    0.00526   -0.00619
I2    3    0.866996    0.974018    0.701696    11.00000    0.02158    0.01932 =
         0.03060    0.00927    0.00446   -0.00136
PD1   5    0.657154    0.644750    0.727088    11.00000    0.01101    0.01221 =
         0.01114    0.00141    0.00122   -0.00139
PD2   5    0.894703    0.837346    0.795253    11.00000    0.01054    0.01188 =
         0.01339    0.00109    0.00225   -0.00100
S1    6    0.898371    0.563809    0.956410    11.00000    0.02247    0.02102 =
         0.02320    0.01045   -0.00597   -0.00272
N3    4    0.773501    0.788460    0.728754    11.00000    0.00936    0.01573 =
         0.01365    0.00354    0.00229    0.00125
N2    4    0.832200    0.690501    0.833687    11.00000    0.01351    0.01431 =
         0.01360    0.00189   -0.00116   -0.00168
N1    4    0.747413    0.580232    0.829271    11.00000    0.01732    0.01414 =
         0.01445    0.00209    0.00178   -0.00298
N4    4    0.967379    0.706988    0.942738    11.00000    0.01715    0.01781 =
         0.01766    0.00467   -0.00149   -0.00277
C1    1    0.760020    0.719775    0.758497    11.00000    0.01177    0.01770 =
         0.00949    0.00315    0.00142    0.00062
N5    4    0.517221    0.734418    0.566443    11.00000    0.01533    0.01521 =
         0.01982    0.00039   -0.00009   -0.00425
C13   1    0.709359    0.827648    0.650812    11.00000    0.00913    0.01295 =
         0.01920    0.00328    0.00344   -0.00109
N6    4    1.080050    0.905991    0.871698    11.00000    0.01331    0.01844 =
         0.02249    0.00142    0.00232   -0.00152
C3    1    0.573048    0.705841    0.627433    11.00000    0.01444    0.01391 =
         0.01861   -0.00334    0.00624   -0.00308
C2    1    0.910479    0.737148    0.871220    11.00000    0.01566    0.01568 =
         0.01610   -0.00089    0.00307   -0.00267
C29   1    1.162566    0.939330    0.893954    11.00000    0.01141    0.02130 =
         0.02203    0.00323    0.00226   -0.00470
C4    1    1.013081    0.877278    0.851392    11.00000    0.02168    0.01537 =
         0.01563    0.00050    0.00562   -0.00053
C37   1    0.822584    0.616145    0.868181    11.00000    0.01906    0.01527 =
         0.01260    0.00221    0.00193   -0.00134
C14   1    0.656592    0.884994    0.668661    11.00000    0.01313    0.01234 =
         0.02971   -0.00181    0.00629   -0.00276
C11   1    0.409317    0.848054    0.608560    11.00000    0.02355    0.06190 =
         0.02653   -0.00523    0.01099    0.00795
AFIX 137
H11A  2    0.469660    0.842777    0.651620    11.00000   -1.50000
H11B  2    0.373281    0.810285    0.626483    11.00000   -1.50000
H11C  2    0.389278    0.902514    0.611719    11.00000   -1.50000
AFIX   0
C26   1    1.116309    0.726409    0.956896    11.00000    0.01979    0.01580 =
         0.01905    0.00508   -0.00054    0.00397
C6    1    0.402767    0.830537    0.510121    11.00000    0.01229    0.02258 =
         0.02271   -0.00038    0.00444   -0.00443
C7    1    0.345088    0.872587    0.434054    11.00000    0.01094    0.01962 =
         0.03456    0.00157    0.00244    0.00204
AFIX  43
H7    2    0.308577    0.912069    0.444137    11.00000   -1.20000
AFIX   0
C21   1    1.050112    0.742338    0.989731    11.00000    0.01382    0.01851 =
         0.01660    0.00824   -0.00391   -0.00108
C5    1    0.453971    0.773141    0.490734    11.00000    0.01330    0.01354 =
         0.01729    0.00272   -0.00237   -0.00195
C19   1    0.663288    0.902262    0.766729    11.00000    0.02209    0.04045 =
         0.04016   -0.01303    0.01586    0.00222
AFIX 137
H19A  2    0.651548    0.853503    0.795085    11.00000   -1.50000
H19B  2    0.620989    0.943278    0.765538    11.00000   -1.50000
H19C  2    0.721711    0.921312    0.803769    11.00000   -1.50000
AFIX   0
C23   1    1.146240    0.821620    1.115558    11.00000    0.02567    0.02487 =
         0.01748    0.00221    0.00174   -0.00441
AFIX  43
H23   2    1.156829    0.853926    1.169496    11.00000   -1.20000
AFIX   0
C38   1    0.824360    0.486709    0.936909    11.00000    0.03434    0.01784 =
         0.02918    0.01278   -0.00089   -0.00897
AFIX  43
H38   2    0.835696    0.437600    0.970094    11.00000   -1.20000
AFIX   0
C22   1    1.064075    0.788447    1.070368    11.00000    0.02013    0.02399 =
         0.01418    0.00613    0.00018   -0.00181
C24   1    1.212203    0.808414    1.083460    11.00000    0.01503    0.02806 =
         0.01907    0.00716   -0.00522   -0.00165
AFIX  43
H24   2    1.267360    0.831966    1.114811    11.00000   -1.20000
AFIX   0
C25   1    1.197860    0.760489    1.004996    11.00000    0.01709    0.02336 =
         0.02404    0.00498    0.00112    0.00489
AFIX  43
H25   2    1.243784    0.750773    0.983822    11.00000   -1.20000
AFIX   0
C32   1    1.326153    0.999941    0.942362    11.00000    0.01647    0.04786 =
         0.02503    0.00520    0.00035   -0.01116
AFIX  43
H32   2    1.383221    1.020337    0.959822    11.00000   -1.20000
AFIX   0
C33   1    1.295656    0.944283    0.870819    11.00000    0.02133    0.04463 =
         0.02935    0.00308    0.01209   -0.00238
AFIX  43
H33   2    1.332022    0.927606    0.839084    11.00000   -1.20000
AFIX   0
C35   1    1.131858    1.022685    1.015232    11.00000    0.03640    0.02522 =
         0.04031   -0.00590    0.01722   -0.00192
AFIX 137
H35A  2    1.073128    1.031194    0.969367    11.00000   -1.50000
H35B  2    1.153885    1.072487    1.049038    11.00000   -1.50000
H35C  2    1.130825    0.981331    1.059866    11.00000   -1.50000
AFIX   0
C8    1    0.340934    0.856884    0.343784    11.00000    0.02240    0.03166 =
         0.02400    0.00651   -0.00534   -0.00259
AFIX  43
H8    2    0.303224    0.887225    0.292691    11.00000   -1.20000
AFIX   0
C30   1    1.189797    0.996647    0.965219    11.00000    0.01954    0.02169 =
         0.02444    0.00319    0.00612   -0.00496
C36   1    1.178645    0.852537    0.766896    11.00000    0.04423    0.04351 =
         0.03588   -0.01434    0.02240   -0.01517
AFIX 137
H36A  2    1.160733    0.804338    0.790888    11.00000   -1.50000
H36B  2    1.223870    0.838958    0.742966    11.00000   -1.50000
H36C  2    1.128792    0.875214    0.716112    11.00000   -1.50000
AFIX   0
C31   1    1.273525    1.025874    0.988453    11.00000    0.02594    0.02873 =
         0.02463   -0.00016    0.00250   -0.01309
AFIX  43
H31   2    1.295001    1.064417    1.036945    11.00000   -1.20000
AFIX   0
C18   1    0.706914    0.812592    0.560285    11.00000    0.01303    0.02204 =
         0.01647    0.00293    0.00301   -0.00320
C34   1    1.213191    0.912463    0.844633    11.00000    0.02066    0.02897 =
         0.02488    0.00032    0.00735   -0.00521
C27   1    0.992923    0.801987    1.106513    11.00000    0.02485    0.04562 =
         0.02177    0.00311    0.00567   -0.00262
AFIX 137
H27A  2    0.940553    0.819460    1.054900    11.00000   -1.50000
H27B  2    1.010752    0.843111    1.155318    11.00000   -1.50000
H27C  2    0.981018    0.752229    1.132916    11.00000   -1.50000
AFIX   0
C12   1    0.506267    0.690672    0.384691    11.00000    0.04547    0.06183 =
         0.03461   -0.02657   -0.00885    0.02308
AFIX 137
H12A  2    0.567058    0.706230    0.415509    11.00000   -1.50000
H12B  2    0.492424    0.684436    0.317220    11.00000   -1.50000
H12C  2    0.496400    0.640043    0.410951    11.00000   -1.50000
AFIX   0
C28   1    1.098559    0.677035    0.870447    11.00000    0.02757    0.02487 =
         0.03283   -0.00497    0.00549    0.00287
AFIX 137
H28A  2    1.068459    0.628046    0.875345    11.00000   -1.50000
H28B  2    1.153343    0.663381    0.864117    11.00000   -1.50000
H28C  2    1.062263    0.707383    0.815329    11.00000   -1.50000
AFIX   0
C20   1    0.767372    0.753145    0.543874    11.00000    0.02481    0.04789 =
         0.01915   -0.00557    0.00766    0.00747
AFIX 137
H20A  2    0.827004    0.772479    0.572797    11.00000   -1.50000
H20B  2    0.752454    0.746337    0.476294    11.00000   -1.50000
H20C  2    0.762062    0.701871    0.571835    11.00000   -1.50000
AFIX   0
C10   1    0.449395    0.754024    0.400632    11.00000    0.02561    0.02682 =
         0.02077   -0.00709   -0.00270    0.00520
C39   1    0.748470    0.505901    0.868210    11.00000    0.02330    0.01464 =
         0.02662    0.00507   -0.00021   -0.00884
AFIX  43
H39   2    0.699905    0.471194    0.848343    11.00000   -1.20000
AFIX   0
C15   1    0.599585    0.927739    0.592578    11.00000    0.01213    0.01493 =
         0.05242    0.00681    0.00678    0.00237
AFIX  43
H15   2    0.563015    0.967113    0.602754    11.00000   -1.20000
AFIX   0
C9    1    0.390995    0.797702    0.327607    11.00000    0.03416    0.04190 =
         0.01584   -0.00294   -0.00160    0.00699
AFIX  43
H9    2    0.385448    0.786488    0.265006    11.00000   -1.20000
AFIX   0
C16   1    0.596057    0.913091    0.502536    11.00000    0.01490    0.03125 =
         0.04036    0.02503   -0.00295    0.00073
AFIX  43
H16   2    0.557102    0.942534    0.451398    11.00000   -1.20000
AFIX   0
C17   1    0.648366    0.856393    0.486530    11.00000    0.01899    0.03975 =
         0.01871    0.01241    0.00130   -0.00705
AFIX  43
H17   2    0.644698    0.846762    0.424218    11.00000   -1.20000
AFIX   0
HKLF 4


REM  CF solution in P21/c
REM wR2 = 0.0673, GooF = S = 1.064, Restrained GooF = 1.064 for all data
REM R1 = 0.0287 for 7884 Fo > 4sig(Fo) and 0.0373 for all 9143 data
REM 459 parameters refined using 0 restraints

END

WGHT      0.0213      7.4429

REM Instructions for potential hydrogen bonds
HTAB C39 I1

REM Highest difference peak  0.979,  deepest hole -1.475,  1-sigma level  0.117
Q1    1   0.8774  0.9414  0.6619  11.00000  0.05    0.98
Q2    1   0.5262  0.4953  0.7163  11.00000  0.05    0.66
Q3    1   0.8794  1.0223  0.7622  11.00000  0.05    0.62
Q4    1   0.8803  0.9117  0.7259  11.00000  0.05    0.62
Q5    1   0.6662  0.6801  0.7081  11.00000  0.05    0.60
Q6    1   0.6131  0.6541  0.7202  11.00000  0.05    0.58
Q7    1   0.3507  0.8504  0.6144  11.00000  0.05    0.55
Q8    1   0.4190  0.8437  0.5524  11.00000  0.05    0.52
Q9    1   0.4379  0.8140  0.5001  11.00000  0.05    0.50
Q10   1   0.9024  1.0189  0.6794  11.00000  0.05    0.50
Q11   1   0.5797  0.5030  0.7021  11.00000  0.05    0.50
;
_shelx_res_checksum                799
_shelx_hkl_file
;
  -3   0   0 230017. 4322.13   3
  -3   0   0 239555. 4352.48   2
   3   0   0 238788. 4339.44   2
   4   0   0 339243. 6177.67   2
  -4   0   0 345652. 6200.04   2
   5   0   0 407547. 7704.07   2
  -5   0   0 412159. 7699.16   4
  -6   0   0 79440.6 2064.16   4
   6   0   0 83089.6 2085.13   2
  -7   0   0 20381.4 916.277   4
   7   0   0 20360.8 910.177   2
   8   0   0 141402. 3411.35   2
  -8   0   0 145165. 3414.79   4
   9   0   0 201034. 4595.69   2
  -9   0   0 207548. 4636.24   4
  10   0   0 1272.53 323.618   2
 -10   0   0 1428.98 323.315   4
 -11   0   0-147.738 235.647   4
  11   0   0-54.5439 222.327   2
 -12   0   0 160.477 269.189   4
  12   0   0 213.419 275.263   2
 -13   0   0 46616.3 1949.57   4
  13   0   0 42992.0 1902.16   2
 -14   0   0 20376.3 1304.31   4
  14   0   0 21271.7 1340.07   2
 -15   0   0 36966.7 1855.98   4
 -16   0   0 84068.1 3089.46   4
 -17   0   0 60016.4 2630.69   4
 -18   0   0 100.904 381.399   4
 -19   0   0 516.032 453.267   4
  19   0   0 610.987 323.761   1
 -20   0   0 2002.47 611.522   4
  20   0   0 3168.39 643.912   1
 -21   0   0 25995.3 1908.22   4
  -2  -1   0 1080.94 114.585   4
   2  -1   0 1260.79 129.115   2
  -3  -1   0 13420.2 508.595   4
   3  -1   0 13034.8 468.813   3
  -3   1   0 15705.8 564.241   2
  -3  -1   0 14927.1 521.848   2
  -3  -1   0 14052.7 530.702   3
  -3   1   0 14502.7 484.491   3
   3   1   0 14255.0 519.222   4
   3  -1   0 14515.9 549.415   2
   4   1   0 87078.7 2035.11   4
   4  -1   0 91977.2 2085.78   2
  -4   1   0 95651.5 2115.91   2
   4  -1   0 89998.4 1988.09   3
  -4  -1   0 90173.4 2028.30   4
   4   1   0 89462.6 2021.34   2
  -4  -1   0 91869.2 2034.56   2
  -4  -1   0 90834.0 2066.66   3
  -4   1   0 92013.4 1983.54   3
  -5  -1   0 22188.6 839.271   4
   5  -1   0 23919.5 823.560   3
   5  -1   0 22174.1 866.772   2
  -5   1   0 24417.8 813.900   3
   5   1   0 23035.9 841.165   2
  -6  -1   0 55690.0 1614.68   4
   6   1   0 60538.5 1646.33   2
   6  -1   0 59348.5 1667.34   2
   7  -1   0 6373.38 508.418   2
   7   1   0 7233.58 526.720   2
  -7  -1   0 6471.60 498.413   4
  -8  -1   0 150867. 3512.57   4
   8   1   0 146073. 3469.22   2
   8  -1   0 147852. 3549.18   2
   9   1   0 36987.5 1445.34   2
  -9  -1   0 38499.4 1461.28   4
   9  -1   0 35846.5 1457.25   2
  -9   1   0 38019.9 1479.62   4
 -10   1   0 9846.71 765.977   4
  10   1   0 10064.1 752.257   2
  10  -1   0 9490.65 734.081   2
 -10  -1   0 10534.1 765.372   4
 -11  -1   0 2467.12 444.047   4
 -11   1   0 2048.96 375.738   4
  11  -1   0 2502.76 409.778   2
  11   1   0 1952.06 376.414   2
 -12   1   0 30451.1 1488.72   4
  12  -1   0 29227.2 1462.36   2
 -12  -1   0 30182.5 1473.58   4
  13  -1   0 53778.1 2122.62   2
 -13   1   0 49144.7 2054.72   4
 -13  -1   0 51961.1 2092.00   4
 -14  -1   0 10032.8 927.527   4
  14  -1   0 8162.59 853.453   2
 -14   1   0 8054.77 866.586   4
  15  -1   0 10578.5 992.107   2
 -15  -1   0 9240.04 900.634   4
 -15   1   0 8830.86 907.820   4
 -16  -1   0 36005.6 1919.83   4
 -16   1   0 38491.6 1974.84   4
  16  -1   0 37005.1 1951.49   2
  17  -1   0 17986.1 1275.98   1
 -17   1   0 14344.6 1251.19   4
 -17  -1   0 14128.2 1235.18   4
  18  -1   0 300.754 313.504   1
 -18  -1   0-345.151 465.702   4
 -18   1   0-381.500 440.897   4
  19  -1   0 10.1024 416.748   1
 -19  -1   0-356.236 531.558   4
 -19   1   0-58.1049 527.611   4
 -20   1   0 5331.62 865.214   4
 -21   1   0 10876.4 1255.45   4
  -2   2   0 1024.70 143.655   2
   2  -2   0 1189.97 160.954   2
  -2   2   0 1414.61 100.446   3
  -2   2   0 961.103 122.609   1
   2  -2   0 1344.47 96.1302   3
  -3  -2   0 182058. 3675.85   3
  -3   2   0 193643. 3588.19   1
  -3   2   0 186427. 3506.51   3
  -3   2   0 189565. 3732.78   2
   3  -2   0 190983. 3587.77   1
   3  -2   0 184755. 3704.08   2
   3   2   0 184943. 3641.88   4
   3  -2   0 186438. 3506.61   3
   4   2   0 12174.6 538.182   4
  -4  -2   0 12342.8 526.770   2
  -4   2   0 12189.9 468.561   3
   4  -2   0 12293.5 582.157   2
   4  -2   0 11098.5 458.762   3
   5  -2   0 83413.5 2052.30   2
  -5  -2   0 80882.5 1974.02   4
  -5   2   0 83469.8 1871.37   3
   5  -2   0 82808.5 1894.58   3
  -6  -2   0 70808.8 1890.22   4
   6  -2   0 69481.4 1950.35   2
   6  -2   0 73715.4 1819.99   1
   7  -2   0 68203.7 2021.57   2
  -7  -2   0 71166.9 1954.57   4
  -8  -2   0 44386.2 1529.05   4
   8  -2   0 45295.9 1591.65   2
   9  -2   0 11078.3 781.255   2
  -9  -2   0 12254.3 781.322   4
  10  -2   0 12154.5 847.572   2
 -10  -2   0 11964.2 821.039   4
  11  -2   0 17144.0 1065.85   2
 -11  -2   0 17403.4 1043.50   4
 -12  -2   0 24229.2 1332.26   4
 -12   2   0 27343.0 1398.10   4
  12  -2   0 24713.3 1353.47   2
 -13  -2   0 7848.05 773.496   4
  13  -2   0 8907.21 744.528   1
 -13   2   0 9457.12 856.894   4
  13  -2   0 9600.45 864.868   2
  14  -2   0 1.46879 355.100   2
 -14  -2   0 376.785 362.678   4
 -14   2   0 776.008 374.758   4
  14  -2   0 468.834 252.653   1
 -15  -2   0 77569.5 2858.52   4
  15  -2   0 83507.6 2734.67   1
  15  -2   0 79694.0 2929.72   2
 -15   2   0 75874.2 2868.45   4
  16  -2   0 3527.79 578.389   1
 -16   2   0 1511.60 463.986   4
 -16  -2   0 2906.14 600.923   4
  16  -2   0 2833.89 616.914   2
 -17  -2   0 1176.72 476.006   4
  17  -2   0 1933.77 453.879   1
  17  -2   0 1556.96 529.205   2
 -17   2   0 1843.36 573.125   4
  18  -2   0 52427.0 2554.21   2
  18  -2   0 57786.8 2415.84   1
 -18   2   0 54344.6 2593.63   4
  19  -2   0-127.880 325.027   1
 -19   2   0 894.449 520.242   4
 -20   2   0 30652.0 2039.75   4
 -21   2   0 3382.73 754.002   4
   0   3   0 276.995 77.3825   5
   1  -3   0 106014. 2230.59   2
   1  -3   0 105554. 2128.87   5
  -1   3   0 108938. 2131.65   5
   2  -3   0 6687.59 378.363   2
   2  -3   0 6811.95 325.775   5
  -2   3   0 7845.57 404.072   2
   3  -3   0 218612. 4384.58   2
  -3   3   0 233201. 4057.19   3
  -3   3   0 228124. 4409.68   2
   3  -3   0 227931. 4058.08   3
  -3  -3   0 217330. 4316.99   3
   4  -3   0 7019.73 334.839   3
   4  -3   0 6838.75 444.397   2
  -4   3   0 7215.99 335.655   3
   4  -3   0 6788.25 386.032   1
  -4   3   0 7282.85 386.479   1
   5  -3   0 10722.6 614.187   2
   5  -3   0 11066.7 529.357   1
   5  -3   0 10420.2 479.410   3
  -5   3   0 11191.4 483.731   3
   6  -3   0 104329. 2430.01   1
   6  -3   0 106914. 2667.36   2
   6  -3   0 105490. 2388.95   3
   7  -3   0 3343.96 411.853   2
   7  -3   0 3239.81 334.495   1
   8  -3   0 69361.0 1905.51   1
   8  -3   0 64563.8 2064.35   2
   9  -3   0 85438.1 2534.38   2
   9  -3   0 82345.2 2263.94   1
  10  -3   0 3212.27 424.152   1
  10  -3   0 3353.76 469.187   2
 -10  -3   0 3474.44 487.437   4
 -11  -3   0 19553.2 1123.82   4
  11  -3   0 19265.2 1022.86   1
  11  -3   0 18141.3 1126.14   2
  12  -3   0 3486.86 434.097   1
  12  -3   0 3369.31 494.389   2
 -12  -3   0 3446.25 508.850   4
  13  -3   0 4876.13 637.284   2
 -13   3   0 3621.03 588.974   4
  13  -3   0 3558.35 489.962   1
  14  -3   0 87788.5 2716.78   1
 -14   3   0 82040.5 2926.14   4
 -15   3   0-235.747 369.604   4
  15  -3   0 395.538 315.890   1
 -16   3   0 606.218 349.352   4
  16  -3   0 137.649 247.975   1
  16  -3   0 497.064 359.574   2
  17  -3   0 51.2033 327.769   2
 -17   3   0 285.820 340.909   4
  17  -3   0-165.500 281.404   1
  18  -3   0 1637.00 468.239   1
 -18   3   0 1994.71 598.921   4
  18  -3   0 752.861 460.959   2
  19  -3   0 1119.74 522.606   2
 -19   3   0 1153.40 546.635   4
 -20   3   0 1161.96 601.278   4
 -21   3   0-64.6855 485.932   4
   0   4   0 12391.5 475.382   5
   1  -4   0 27434.3 867.163   2
  -1   4   0 26783.3 770.891   5
   1  -4   0 26625.2 769.647   5
   2  -4   0 23338.7 832.091   2
  -2   4   0 23986.6 838.091   2
   2  -4   0 25010.1 748.559   5
  -2   4   0 22700.8 722.948   5
   3  -4   0 487443. 8591.66   3
  -3  -4   0 479832. 8965.48   3
   3  -4   0 486833. 8879.70   5
  -3   4   0 492909. 8594.84   3
   3  -4   0 483100. 9070.35   2
  -4   4   0 130254. 2817.56   1
   4  -4   0 138666. 2628.00   3
  -4   4   0 129766. 2601.82   3
   4  -4   0 133659. 3023.81   2
  -5   4   0 656.157 115.003   3
   5  -4   0 293.375 164.058   2
   5  -4   0 275.335 101.150   3
   6  -4   0 13593.0 600.846   3
   6  -4   0 14285.8 796.466   2
  -6   4   0 15138.2 610.155   3
   7  -4   0 103507. 2751.31   2
   7  -4   0 100731. 2479.03   1
   8  -4   0 11915.2 682.265   1
   8  -4   0 11463.9 789.741   2
   9  -4   0 41323.0 1453.43   1
   9  -4   0 41870.0 1660.60   2
  10  -4   0 3936.40 531.709   2
  10  -4   0 4029.52 448.781   1
  11  -4   0 50496.6 1756.50   1
  11  -4   0 45921.4 1931.30   2
  12  -4   0 96057.5 3131.88   2
  12  -4   0 107072. 2945.24   1
  13  -4   0 66770.0 2215.46   1
  13  -4   0 54447.4 2318.45   2
  14  -4   0 1896.44 399.001   1
  14  -4   0 986.674 416.637   2
  15  -4   0 12479.4 1102.31   2
 -15   4   0 11424.8 1093.28   4
  15  -4   0 13688.2 1005.20   1
  16  -4   0 50266.1 2090.00   1
 -16   4   0 48462.8 2337.16   4
  16  -4   0 47752.4 2309.79   2
 -17   4   0 2688.07 664.907   4
  17  -4   0 3293.79 584.314   1
  17  -4   0 3542.50 726.753   2
  18  -4   0 38676.9 1917.83   1
 -18   4   0 39137.4 2195.14   4
  18  -4   0 34806.3 2111.89   2
  19  -4   0 398.471 431.340   2
 -19   4   0 2142.29 717.904   4
 -20   4   0 35411.8 2211.00   4
  20  -4   0 29099.8 2010.65   2
   0   5   0 499.091 140.123   5
   1  -5   0 2174.87 209.444   5
  -1   5   0 3710.82 271.524   5
   2  -5   0 26686.4 832.890   5
   2  -5   0 27795.8 965.778   2
   3  -5   0 9552.51 304.352   3
   3  -5   0 9999.50 486.726   5
   3  -5   0 10337.3 581.411   2
  -3   5   0 9488.25 307.606   3
   4  -5   0 253136. 4725.32   3
   4  -5   0 252274. 5296.04   2
   4  -5   0 247971. 5044.02   5
   5  -5   0 126020. 3073.23   2
  -5   5   0 128874. 2550.18   3
   5  -5   0 122440. 2550.82   3
   6  -5   0 99383.7 2205.84   3
   6  -5   0 95122.7 2637.34   2
  -6   5   0 101038. 2182.65   3
   7  -5   0 34.1409 197.533   2
   8  -5   0 22376.1 974.938   1
   8  -5   0 19884.0 1092.12   2
   9  -5   0 109998. 2794.01   1
   9  -5   0 104881. 3072.25   2
  10  -5   0 24719.2 1124.60   1
  10  -5   0 22099.9 1268.52   2
  11  -5   0 69067.5 2470.83   2
  11  -5   0 70823.5 2204.06   1
  12  -5   0 231112. 5265.34   1
  12  -5   0 225877. 5644.94   2
  13  -5   0 963.461 309.858   1
  13  -5   0 12.4641 386.526   2
  14  -5   0 7790.22 860.204   2
  14  -5   0 12494.9 908.539   1
  15  -5   0 8879.00 805.447   1
  15  -5   0 5776.85 803.437   2
  16  -5   0 7016.81 766.343   1
 -16   5   0 7204.31 905.821   4
  16  -5   0 7608.84 944.842   2
 -17   5   0 95968.1 3595.60   4
  17  -5   0 102296. 3307.54   1
  17  -5   0 93520.7 3561.01   2
 -18   5   0 1674.15 632.949   4
  18  -5   0 1747.02 633.072   2
  19  -5   0-433.266 486.922   2
 -19   5   0-54.0136 409.287   4
  20  -5   0 1168.00 559.257   2
 -20   5   0 1767.84 673.734   4
   0   6   0 189442. 3828.90   5
  -1   6   0 55946.2 1456.43   5
  -2   6   0 37835.7 1143.41   5
   2  -6   0 38171.5 817.570   3
   2  -6   0 40402.8 1143.80   5
   3  -6   0 3466.78 304.020   5
   3  -6   0 3587.96 387.389   2
   3  -6   0 3050.51 149.479   3
   4  -6   0 306934. 6199.38   2
   4  -6   0 299753. 5456.15   3
  -4   6   0 304827. 5458.32   3
   5  -6   0 49609.6 1178.38   3
   5  -6   0 48692.2 1656.63   2
  -5   6   0 49870.0 1171.06   3
   6  -6   0 22966.3 763.856   3
   6  -6   0 23850.3 1129.57   2
  -6   6   0 25353.2 775.224   3
   7  -6   0 13249.8 865.329   2
   8  -6   0 28025.8 1337.59   2
   9  -6   0 57525.4 2146.67   2
  10  -6   0 88.0553 275.990   2
  11  -6   0 19.6645 271.507   2
  12  -6   0 128.523 290.619   2
  12  -6   0 111.065 230.742   1
  13  -6   0 55732.6 2027.56   1
  13  -6   0 51333.4 2258.43   2
  14  -6   0 75.6020 241.686   1
  14  -6   0-104.128 301.653   2
  15  -6   0-221.615 356.537   1
  15  -6   0 22.2293 369.637   2
  16  -6   0 1379.22 424.994   2
  16  -6   0 2819.32 501.384   1
  17  -6   0 2539.54 470.464   1
 -17   6   0 1399.33 458.522   4
  17  -6   0 2101.98 600.000   2
 -18   6   0 6948.64 981.267   4
  18  -6   0 6720.13 961.269   2
 -19   6   0 3745.98 816.110   4
  19  -6   0 3877.02 749.415   2
  20  -6   0 7321.12 1013.98   2
 -20   6   0 6205.08 1000.57   4
   0   7   0 133.355 125.966   5
  -1   7   0 113871. 2579.55   5
  -2   7   0 127839. 2846.21   5
   2  -7   0 126322. 3040.33   2
   2  -7   0 126952. 2384.81   3
   3  -7   0 183977. 4141.43   2
   4  -7   0 402.884 76.1616   3
   4  -7   0 270.759 179.988   2
   5  -7   0 485.088 225.679   2
   5  -7   0 473.616 99.5059   3
   6  -7   0 284395. 6190.62   2
  -6   7   0 285293. 5320.28   3
   7  -7   0 332.488 264.697   2
  -7   7   0 230.266 96.2923   3
   8  -7   0 47188.4 1859.19   2
   9  -7   0 84774.5 2752.99   2
  10  -7   0 979.083 366.191   2
  11  -7   0 87428.6 2965.37   2
  12  -7   0 983.305 397.212   2
  13  -7   0 575.271 373.970   2
  14  -7   0 20999.4 1467.46   2
  15  -7   0-126.322 395.385   2
  16  -7   0 2379.27 580.478   2
  17  -7   0 597.041 407.392   2
  18  -7   0-158.015 417.300   2
 -18   7   0-250.888 500.632   4
  19  -7   0 298.908 422.290   2
 -19   7   0 545.184 539.783   4
 -20   7   0-914.726 661.252   4
   0   8   0 15860.9 740.194   5
  -1   8   0 3323.28 343.930   5
   2  -8   0 74657.8 2167.25   2
   2  -8   0 74696.8 1509.13   3
  -2   8   0 75104.3 1972.57   5
  -3   8   0 85001.8 2186.72   5
   3  -8   0 87676.4 2445.57   2
   4  -8   0 29344.9 1287.95   2
   5  -8   0 29094.9 1316.12   2
   5  -8   0 28838.8 722.559   3
   6  -8   0 34363.3 1481.55   2
  -6   8   0 31788.3 858.487   3
   7  -8   0 3318.80 496.287   2
  -7   8   0 3096.07 248.380   3
   8  -8   0 6599.48 698.907   2
   9  -8   0 15141.2 1058.81   2
  10  -8   0 69854.7 2602.04   2
  11  -8   0 1923.53 476.515   2
  12  -8   0 6461.05 772.008   2
  13  -8   0 17733.4 1312.67   2
  14  -8   0 18767.0 1414.05   2
  15  -8   0 12380.1 1200.34   2
  16  -8   0 7360.23 943.991   2
  17  -8   0 1410.86 551.653   2
  18  -8   0 187.109 476.158   2
 -19   8   0 43861.1 2539.55   4
  19  -8   0 43149.3 2518.98   2
   0   9   0-71.5823 172.653   5
   1   9   0 97371.0 2481.22   5
  -1   9   0 97370.7 2440.20   5
  -2   9   0 13231.4 722.205   5
   2  -9   0 12534.7 822.268   2
   3  -9   0 50902.5 1797.79   2
  -3   9   0 49526.1 1570.70   5
   4  -9   0 8375.21 688.239   2
   5  -9   0 100670. 2907.87   2
   6  -9   0 55780.1 2070.41   2
   7  -9   0 397.451 303.139   2
  -7   9   0 287.680 88.3890   3
   8  -9   0 65634.9 2381.37   2
  -8   9   0 65649.4 1590.48   3
   9  -9   0 93550.9 3040.51   2
  10  -9   0 12650.8 1061.61   2
  11  -9   0-54.3113 333.779   2
  12  -9   0 4420.08 699.987   2
  13  -9   0 6572.98 838.831   2
  14  -9   0 48803.2 2384.86   2
  15  -9   0 13353.3 1256.56   2
  16  -9   0 6627.75 908.144   2
  17  -9   0-3.07002 370.874   2
  18  -9   0 7614.28 1047.84   2
  19  -9   0 1045.64 547.504   2
   0  10   0 227866. 4897.41   5
   0 -10   0 229134. 4476.39   3
   1  10   0 52265.7 1674.19   5
   1 -10   0 48887.2 1787.46   2
   1 -10   0 50477.4 1243.72   3
  -1  10   0 53354.8 1659.91   5
   2 -10   0 44494.7 1708.08   2
  -2  10   0 47100.2 1555.13   5
  -3  10   0 8673.44 602.702   5
   3 -10   0 8492.73 711.299   2
   4 -10   0 22133.4 1192.14   2
   5 -10   0 155330. 4040.38   2
   6 -10   0 26574.6 1385.47   2
   7 -10   0 41086.4 1839.99   2
   8 -10   0 18290.5 1234.48   2
   9 -10   0 52293.4 2205.06   2
  10 -10   0 406.070 317.158   2
  11 -10   0 14589.9 1189.50   2
  12 -10   0 62.0215 386.985   2
  13 -10   0 16241.6 1323.07   2
  14 -10   0 19753.4 1519.77   2
  15 -10   0 3676.61 739.176   2
  16 -10   0 52992.9 2686.45   2
  17 -10   0 26489.7 1896.27   2
  18 -10   0 643.651 453.158   2
   0 -11   0 763.363 169.303   3
   0  11   0 703.489 276.671   5
   1 -11   0 202.806 89.4720   3
   1 -11   0 367.675 258.993   2
  -1  11   0 422.057 224.210   5
   2 -11   0 9121.36 370.308   3
  -2  11   0 9664.72 676.219   5
   2 -11   0 10976.0 833.958   2
   2  11   0 9307.88 679.998   5
   3 -11   0 15132.9 983.253   2
  -3  11   0 16212.7 880.942   5
   4 -11   0 61354.7 2201.15   2
   5 -11   0 3509.28 519.337   2
   6 -11   0 2386.59 496.017   2
   7 -11   0 12807.9 1027.63   2
   8 -11   0 135580. 3970.02   2
   9 -11   0 21348.0 1384.41   2
  10 -11   0 9694.09 984.357   2
  11 -11   0 8289.57 908.755   2
  12 -11   0 48756.5 2365.45   2
  13 -11   0 77215.6 3116.32   2
  14 -11   0 1443.23 485.424   2
  15 -11   0 1554.74 608.614   2
  16 -11   0 31231.0 2059.12   2
  17 -11   0 42514.5 2491.57   2
  18 -11   0 6867.85 1030.38   2
   0  12   0 1513.45 304.569   5
   1 -12   0 53987.0 2003.27   2
   1  12   0 52557.7 1812.56   5
   1 -12   0 49199.9 1297.08   3
  -1  12   0 53335.1 1795.02   5
  -2  12   0 22363.8 1086.94   5
   2 -12   0 22625.2 653.536   3
   2 -12   0 21632.6 1224.03   2
   2 -12   0 19577.5 620.102   3
   2  12   0 22349.8 1115.79   5
   3 -12   0 5053.66 604.648   2
  -3  12   0 4551.13 497.870   5
   4 -12   0 37358.4 1734.56   2
   5 -12   0 1002.76 367.121   2
   6 -12   0 72491.5 2644.90   2
   7 -12   0 130.919 357.898   2
   8 -12   0 232.890 342.429   2
   9 -12   0 5377.32 721.147   2
  10 -12   0 43858.8 2154.84   2
  11 -12   0 5280.73 775.066   2
  12 -12   0 6033.82 818.751   2
  13 -12   0 11938.8 1215.05   2
  14 -12   0 8921.19 1091.42   2
  15 -12   0 33231.2 2119.77   2
  16 -12   0 172.482 491.878   2
  17 -12   0 6290.05 986.624   2
   0  13   0 7.07202 281.135   5
  -1  13   0 3124.74 435.803   5
   1  13   0 3634.96 490.048   5
   1 -13   0 3241.47 526.713   2
   2 -13   0 99768.0 2061.90   3
   2  13   0 99673.3 2877.17   5
   2 -13   0 99840.1 3122.70   2
  -2  13   0 98278.6 2813.19   5
   3  13   0 2256.59 426.918   5
   3 -13   0 2767.64 527.288   2
  -3  13   0 2369.89 405.148   5
   4 -13   0 2240.13 498.610   2
   5 -13   0 27313.7 1524.19   2
   6 -13   0 31279.2 1675.70   2
   7 -13   0 70204.5 2694.98   2
   8 -13   0 44378.1 2138.28   2
   9 -13   0 936.678 426.741   2
  10 -13   0 23467.0 1569.94   2
  11 -13   0 2904.33 597.973   2
  12 -13   0 1312.45 517.339   2
  13 -13   0 22258.3 1681.01   2
  14 -13   0 4011.67 818.019   2
  15 -13   0 16054.3 1502.64   2
  16 -13   0 1352.77 436.272   2
  17 -13   0 1465.03 517.698   2
   0  14   0 140.786 252.049   5
   1 -14   0 8135.42 816.380   2
  -1  14   0 10639.8 806.332   5
   1  14   0 9786.40 794.438   5
  -2  14   0 16275.9 1027.32   5
   2 -14   0 18142.3 1220.94   2
   2  14   0 17954.1 1108.48   5
  -3  14   0 92825.9 2753.96   5
   3  14   0 91016.7 2833.47   5
   3 -14   0 90798.1 3074.79   2
   4 -14   0 1973.64 466.456   2
   5 -14   0 12605.9 1086.57   2
   6 -14   0 2014.71 492.626   2
   7 -14   0 37876.6 1990.69   2
   8 -14   0 5075.94 750.006   2
   9 -14   0 8081.66 926.857   2
  10 -14   0 5364.38 856.825   2
  11 -14   0 1898.29 595.439   2
  12 -14   0 42627.5 2325.29   2
  13 -14   0 13960.1 1362.93   2
  14 -14   0-491.020 537.189   2
  15 -14   0 913.845 397.160   2
  16 -14   0 4544.84 876.275   2
   0 -15   0-259.982 399.799   2
   0  15   0-152.465 308.500   5
   1 -15   0 37913.8 1868.09   2
   1  15   0 37774.1 1688.64   5
  -1  15   0 38705.9 1667.91   5
   2 -15   0 2811.11 538.979   2
   2  15   0 2649.90 472.054   5
  -2  15   0 2558.23 452.205   5
  -3  15   0 2544.34 510.291   5
   3 -15   0 2660.02 561.583   2
   3  15   0 1943.84 482.646   5
   4  15   0 27229.1 1486.10   5
   4 -15   0 26691.5 1606.17   2
   5 -15   0 65640.9 2657.03   2
   6 -15   0 517.513 439.220   2
   7 -15   0 26864.9 1706.49   2
   8 -15   0 1792.29 486.330   2
   9 -15   0 1886.21 538.315   2
  10 -15   0 79163.6 3237.30   2
  11 -15   0 24983.0 1772.86   2
  12 -15   0 17597.9 1533.51   2
  13 -15   0 13897.2 1411.17   2
  14 -15   0-95.5315 575.636   2
  15 -15   0 358.601 483.497   2
   0  16   0 32514.9 1570.63   5
   0 -16   0 33269.0 1779.09   2
   1  16   0 14316.3 1015.35   5
   1 -16   0 13628.5 1124.76   2
  -1  16   0 13867.2 991.204   5
   2 -16   0 661.694 343.524   2
  -2  16   0 459.174 266.803   5
   2  16   0 163.333 284.263   5
   3  16   0 2831.92 532.904   5
   3 -16   0 2022.25 524.253   2
  -3  16   0 2701.78 510.007   5
   4  16   0 58370.9 2315.48   5
   4 -16   0 58573.3 2553.19   2
   5 -16   0 18660.3 1400.50   2
   5  16   0 20446.4 1315.85   5
   6 -16   0 3051.18 584.732   2
   7 -16   0 2463.09 572.594   2
   8 -16   0 21020.0 1558.35   2
   9 -16   0 27408.2 1826.13   2
  10 -16   0 3041.74 704.542   2
  11 -16   0 4093.59 777.928   2
  12 -16   0 6393.39 1011.76   2
  13 -16   0 6478.12 989.414   2
  14 -16   0-1507.76 598.104   2
   0  17   0 438.956 284.237   5
   0 -17   0-175.695 422.843   2
   1  17   0 365.176 264.782   5
  -1 -17   0 371.933 303.198   2
  -1  17   0 752.354 314.512   5
   1 -17   0 98.1957 381.728   2
   2 -17   0 1552.50 491.839   2
   2  17   0 2295.19 479.491   5
  -2  17   0 2933.59 506.700   5
   3  17   0 8675.08 862.086   5
   3 -17   0 10861.2 1065.13   2
  -3  17   0 9658.77 883.092   5
   4  17   0 1259.91 480.360   5
   4 -17   0 2641.14 596.442   2
   5  17   0 13509.1 1111.43   5
   5 -17   0 12580.2 1203.55   2
   6  17   0 8434.01 905.242   5
   6 -17   0 8635.88 1003.27   2
   7 -17   0 899.670 474.934   2
   8 -17   0 38697.4 2235.79   2
   9 -17   0 73.0200 433.626   2
  10 -17   0 6100.76 929.284   2
  11 -17   0 26927.4 1948.51   2
  12 -17   0 926.171 544.927   2
  13 -17   0 19947.4 1748.90   2
  14 -17   0-609.365 603.461   2
   0 -18   0 751.960 445.175   2
   0  18   0-84.9974 294.114   5
  -1  18   0 623.177 329.228   5
   1  18   0 204.486 307.485   5
   1 -18   0 45.7517 366.962   2
  -1 -18   0 372.508 337.604   2
   2  18   0 20535.0 1352.57   5
  -2  18   0 21939.1 1345.78   5
   2 -18   0 23474.1 1614.48   2
   3  18   0 12566.4 1074.52   5
  -3  18   0 13656.6 1062.54   5
   3 -18   0 14422.2 1260.15   2
   4  18   0 13659.6 1134.68   5
   4 -18   0 14104.7 1249.82   2
   5 -18   0 11593.7 1180.16   2
   5  18   0 11962.9 1082.51   5
   6  18   0 21161.1 1455.75   5
   6 -18   0 17575.6 1473.70   2
   7 -18   0 6124.19 955.865   2
   7  18   0 6572.51 880.143   5
   8 -18   0-155.740 384.375   2
   9 -18   0-548.715 644.663   2
  10 -18   0 47495.2 2619.02   2
  11 -18   0 21602.5 1792.53   2
  12 -18   0 322.736 499.292   2
  13 -18   0 2487.96 815.128   2
   0  19   0-8.45556 276.207   5
   0 -19   0 150.207 428.569   2
  -1 -19   0 1569.14 599.649   2
  -1  19   0 1145.97 387.558   5
   1 -19   0 1304.98 468.872   2
   1  19   0 943.941 382.070   5
   2  19   0 36802.9 1903.70   5
   2 -19   0 39626.1 2189.84   2
  -2 -19   0 38008.2 2129.33   2
  -2  19   0 40251.2 1924.47   5
   3  19   0-237.030 392.378   5
   3 -19   0 404.521 355.753   2
   4 -19   0 269.790 395.408   2
   4  19   0 254.725 328.915   5
   5  19   0 4498.00 689.350   5
   5 -19   0 4458.22 807.454   2
   6 -19   0 1356.47 587.999   2
   6  19   0 1189.39 467.080   5
   7 -19   0 36688.3 2229.78   2
   7  19   0 36595.2 2052.86   5
   8  19   0 3779.49 718.493   5
   8 -19   0 6409.97 983.060   2
   9 -19   0 17511.6 1600.66   2
  10 -19   0-208.247 396.918   2
  11 -19   0 9375.95 1214.34   2
   0 -20   0 3556.40 737.766   2
   0  20   0 2860.85 586.128   5
  -1 -20   0 49045.0 2483.20   2
   1  20   0 44043.9 2162.90   5
   1 -20   0 44460.3 2413.22   2
  -2 -20   0 5211.54 839.651   2
   2  20   0 3962.47 672.237   5
   2 -20   0 5681.23 938.829   2
   3 -20   0 6776.20 948.147   2
   3  20   0 6291.35 828.193   5
   4 -20   0 14654.5 1401.02   2
   4  20   0 18603.0 1384.66   5
   5 -20   0 409.896 422.038   2
   5  20   0 96.3105 335.538   5
   6  20   0 10143.0 1088.53   5
   6 -20   0 11476.1 1292.17   2
   7  20   0 42304.1 2310.90   5
   7 -20   0 43752.9 2543.50   2
   8  20   0 10732.1 1188.50   5
   8 -20   0 10180.3 1258.97   2
   9  20   0 634.202 431.262   5
   9 -20   0 1299.91 577.978   2
  10  20   0 372.567 425.047   5
  10 -20   0 1387.85 534.432   2
   0 -21   0 149.837 456.933   2
   1 -21   0 3036.96 737.946   2
  -1 -21   0 1711.33 631.457   2
  -2 -21   0 163.318 496.921   2
   2 -21   0 21.2011 514.703   2
   3 -21   0 4583.69 833.192   2
   3  21   0 4236.36 723.331   5
  -3 -21   0 4762.07 805.498   2
   4 -21   0 3263.55 749.417   2
   4  21   0 3330.73 643.600   5
   5  21   0 53.3083 427.822   5
   5 -21   0 75.7455 379.804   2
   6 -21   0 167.961 478.390   2
   6  21   0 22.6550 415.176   5
   7 -21   0 1900.27 688.506   2
   7  21   0 995.235 456.699   5
   8 -21   0 14350.3 1500.65   2
   8  21   0 12268.5 1305.73   5
   9 -21   0 696.386 529.728   2
   9  21   0-378.345 515.045   5
   0 -22   0 4623.00 857.962   2
  -1 -22   0 45890.1 2572.20   2
   1 -22   0 51616.8 2755.65   2
  -2 -22   0 1185.91 545.564   2
   2 -22   0 595.496 452.459   2
   3 -22   0 3262.81 765.037   2
  -3 -22   0 3447.72 789.488   2
  -4 -22   0 39426.8 2345.85   2
   4 -22   0 34924.1 2300.04   2
   5  22   0 1052.59 449.737   5
   5 -22   0 971.237 472.383   2
   6  22   0 7075.27 968.061   5
   6 -22   0 10121.5 1264.35   2
   7  22   0 12927.7 1345.67   5
   7 -22   0 17318.9 1644.34   2
   8  22   0 7770.43 1042.28   5
   0 -23   0-730.945 518.435   2
   1 -23   0 2660.32 746.841   2
  -1 -23   0 2127.13 649.916   2
   2 -23   0 50602.2 2818.25   2
  -2 -23   0 53392.9 2831.55   2
  -3 -23   0 4682.59 929.540   2
   3 -23   0 4735.80 916.347   2
  -4 -23   0 38.9903 463.793   2
   4 -23   0 1524.72 596.431   2
  -5 -23   0 479.592 426.632   2
   5 -23   0 235.954 463.077   2
   0 -24   0 496.532 522.838   2
   1 -24   0 309.610 434.527   2
  -1 -24   0-139.448 447.529   2
   2 -24   0 5148.92 988.729   2
  -2 -24   0 5288.42 953.179   2
  -3 -24   0 2183.04 700.177   2
  21   0  -1 552.836 407.622   1
 -21   0   1-370.208 455.666   4
 -20   0   1-68.1245 433.736   4
  20   0  -1-45.5168 394.085   1
 -19   0   1-570.855 535.729   4
  19   0  -1-169.685 436.659   1
 -18   0   1-870.326 561.868   4
 -17   0   1 205.398 408.297   4
 -16   0   1 452.098 372.427   4
 -15   0   1 118.347 383.038   4
  14   0  -1 762.142 420.658   2
 -14   0   1 712.057 448.561   4
  13   0  -1-205.548 275.763   2
 -13   0   1 11.8115 306.545   4
 -12   0   1-69.9342 273.001   4
  12   0  -1-109.907 308.865   2
  11   0  -1 94.6662 211.333   2
 -11   0   1-14.8132 217.109   4
  10   0  -1 295.856 225.487   2
 -10   0   1-352.274 298.224   4
   9   0  -1 444.853 232.215   2
  -9   0   1 395.256 261.860   4
  -8   0   1-49.5901 212.003   4
   8   0  -1-64.4957 203.913   2
  -7   0   1 139.590 179.419   4
   7   0  -1 513.062 188.517   2
  -6   0   1-73.0574 146.356   4
   6   0  -1 71.8534 116.884   2
   5   0  -1 296.323 120.556   2
  -5   0   1 288.554 130.938   4
  -4   0   1 1193.83 163.105   2
   4   0  -1 934.720 155.293   2
  -3   0   1 341.911 95.8753   2
  -3   0   1 263.545 91.8514   4
  -2   0  -1 867.453 120.958   3
   2   0   1 272.165 84.1969   3
  -2   0  -1 315.958 82.9129   2
   2   0   1 867.153 114.967   2
  -3   0  -1 406.584 118.818   3
   3   0   1 233.227 103.520   2
   3   0   1 375.603 126.088   3
  -3   0  -1 265.439 101.158   2
   4   0   1 424.819 136.002   3
  -4   0  -1 573.976 144.993   2
  -4   0  -1 382.054 116.326   3
   5   0   1 261.926 126.510   2
   5   0   1 98.6145 104.135   3
   6   0   1 16.1318 124.776   3
   6   0   1 236.538 126.004   2
  -6   0  -1-35.1091 143.826   4
  -7   0  -1 61.1360 174.475   4
   7   0   1 200.391 185.941   2
   7   0   1 424.082 187.901   3
  -8   0  -1 147.374 182.106   4
   8   0   1 387.143 212.616   3
   8   0   1-90.0481 195.649   2
  -9   0  -1 91.6947 193.888   4
   9   0   1 34.0755 204.386   2
 -10   0  -1-27.0293 260.915   4
  10   0   1 95.8434 200.901   2
 -11   0  -1 197.626 214.235   4
  11   0   1-1023.80 299.389   2
 -12   0  -1 209.120 239.925   4
  12   0   1-334.712 288.595   2
  13   0   1-73.0300 284.255   2
 -13   0  -1-70.1331 347.277   4
  14   0   1-604.821 370.925   2
 -14   0  -1 75.3090 323.553   4
 -15   0  -1-423.337 458.610   4
  15   0   1-72.4424 339.648   2
 -16   0  -1 289.922 387.939   4
 -17   0  -1-372.851 454.124   4
 -18   0  -1-381.857 519.801   4
 -19   0  -1-756.742 535.857   4
 -20   0  -1-107.720 432.629   4
 -21   0  -1 183.802 455.895   4
  21  -1  -1-285.240 489.176   1
 -21   1   1 805.813 499.327   4
  21   1  -1 504.284 372.045   1
  20  -1  -1 4433.63 721.895   1
 -20   1   1 3866.02 695.585   4
 -19  -1   1 2062.24 539.727   4
  19  -1  -1 2287.87 490.383   1
 -19   1   1 2026.89 523.840   4
 -18   1   1-483.384 503.942   4
 -18  -1   1 60.1344 384.259   4
  18  -1  -1 57.4794 350.729   1
 -17   1   1 1259.51 446.207   4
  17  -1  -1 1427.46 404.545   1
 -17  -1   1 1410.48 533.963   4
  16  -1  -1 6686.05 841.667   2
  16  -1  -1 6451.46 741.099   1
 -16  -1   1 5773.63 777.073   4
 -16   1   1 5953.37 793.234   4
  15  -1  -1 23165.8 1430.19   2
 -15  -1   1 22091.4 1409.08   4
 -15   1   1 21466.6 1389.29   4
 -14  -1   1 6361.38 749.495   4
  14  -1  -1 6503.25 767.596   2
 -14   1   1 4102.43 629.530   4
 -13   1   1 72645.0 2526.22   4
 -13  -1   1 69901.8 2473.57   4
  13  -1  -1 67973.1 2463.98   2
  12  -1  -1 3668.94 525.330   2
 -12   1   1 4098.44 544.247   4
 -12  -1   1 5337.79 613.594   4
  11  -1  -1 11312.9 837.116   2
 -11   1   1 10103.9 795.029   4
 -11  -1   1 10272.0 800.975   4
 -10   1   1 169275. 4056.78   4
  10  -1  -1 161192. 4012.43   2
 -10  -1   1 166755. 4024.66   4
   9   1  -1 10061.9 704.295   2
  -9   1   1 9665.37 697.794   4
   9  -1  -1 10398.3 721.398   2
  -9  -1   1 10506.6 725.791   4
   8   1  -1 59248.0 1800.80   2
   8  -1  -1 58444.5 1829.71   2
  -8  -1   1 56725.3 1779.86   4
   7  -1  -1 383063. 7579.21   2
  -7  -1   1 381821. 7547.89   4
   7   1  -1 399533. 7566.36   2
   6  -1  -1 2719.47 305.612   2
   6   1  -1 2205.86 280.634   2
  -6  -1   1 2789.72 314.384   4
  -5  -1   1 245758. 4831.51   4
   5  -1  -1 239500. 4848.38   2
  -5   1   1 250296. 4739.62   3
  -4  -1   1 184526. 3722.21   4
  -4   1   1 190700. 3787.19   2
   4   1  -1 192235. 3741.29   4
   4  -1  -1 183347. 3747.40   2
  -4  -1   1 193985. 3749.63   2
   3  -1  -1 30439.7 822.657   2
   3   1  -1 27697.1 793.985   4
  -3   1   1 29439.7 827.183   2
  -3  -1   1 28065.8 795.993   4
   3  -1  -1 28322.7 798.992   1
  -2   1  -1 264668. 4851.99   3
  -2  -1  -1 262805. 4815.32   4
   2  -1   1 265316. 4847.82   3
   2   1   1 266673. 4825.72   4
   2   1   1 258619. 4790.22   2
  -2  -1  -1 265756. 4916.01   3
   2  -1   1 255630. 4888.83   2
   2   1   1 266930. 4916.08   3
  -2  -1  -1 268995. 4806.12   2
  -2   1  -1 264062. 4906.40   2
  -3   1  -1 64429.3 1523.62   2
   3   1   1 63874.2 1526.39   3
  -3  -1  -1 63790.2 1444.48   2
  -3  -1  -1 61559.1 1441.25   4
   3  -1   1 63221.2 1520.99   2
   3   1   1 64536.1 1458.34   4
   3   1   1 60462.8 1426.05   2
  -3  -1  -1 60826.8 1512.36   3
  -3   1  -1 65662.7 1478.99   3
   3  -1   1 61353.0 1454.51   3
  -4   1  -1 11679.7 551.245   2
   4  -1   1 11409.8 542.802   2
   4   1   1 12169.0 523.586   2
   4  -1   1 11478.3 523.872   3
   4   1   1 10428.9 539.135   3
  -4   1  -1 11274.8 513.107   3
  -4  -1  -1 11234.5 514.162   2
  -4  -1  -1 11864.6 528.327   4
   5  -1   1 91322.6 2233.59   2
   5   1   1 92995.7 2253.24   3
   5   1   1 92107.4 2165.96   2
   5  -1   1 88289.1 2169.03   3
  -5  -1  -1 96603.1 2195.87   4
   6   1   1 89593.5 2234.52   2
   6  -1   1 91431.8 2273.03   3
   6  -1   1 93364.7 2331.94   2
  -6  -1  -1 91224.3 2256.68   4
   6   1   1 90166.3 2319.27   3
  -7  -1  -1 174951. 3815.91   4
   7   1   1 170603. 3798.57   2
   7  -1   1 172588. 3812.51   3
   7  -1   1 167182. 3831.50   2
   7   1   1 167496. 3866.79   3
   8   1   1 143076. 3361.78   2
   8  -1   1 140275. 3397.05   2
  -8  -1  -1 135165. 3310.99   4
   8  -1   1 134808. 3324.56   3
  -9  -1  -1 5517.32 538.298   4
  -9   1  -1 5375.72 539.511   4
   9   1   1 5152.05 513.921   2
   9  -1   1 5899.74 561.242   2
 -10   1  -1 127228. 3402.03   4
  10  -1   1 133929. 3455.80   2
 -10  -1  -1 126104. 3351.93   4
  10   1   1 128830. 3362.02   2
  11  -1   1 62.3456 200.279   2
  11   1   1 457.272 277.859   2
 -11   1  -1 62.5877 231.188   4
  12  -1   1 3491.39 537.762   2
 -12   1  -1 4789.30 623.147   4
  12   1   1 4483.85 569.974   2
 -12  -1  -1 3420.35 522.684   4
  13  -1   1 105749. 3301.28   2
 -13  -1  -1 111390. 3333.39   4
 -13   1  -1 107562. 3314.11   4
 -14   1  -1 2404.55 515.028   4
  14  -1   1 2909.37 522.036   2
 -14  -1  -1 3784.17 596.470   4
 -15  -1  -1 30696.3 1694.52   4
 -15   1  -1 32639.4 1756.06   4
  15  -1   1 28043.7 1666.11   2
 -16  -1  -1 14229.2 1174.90   4
  16  -1   1 14300.5 1195.87   2
 -16   1  -1 14576.6 1219.55   4
  17  -1   1 1327.20 324.433   1
  17  -1   1 2112.86 535.252   2
 -17  -1  -1 1316.28 465.060   4
 -17   1  -1 1326.83 471.240   4
 -18   1  -1-380.401 436.635   4
  18  -1   1-296.472 384.479   1
 -18  -1  -1-326.883 467.048   4
 -19  -1  -1 4558.55 768.247   4
 -19   1  -1 5082.38 796.628   4
 -20   1  -1-79.5406 507.819   4
 -21   1  -1 6823.56 1015.29   4
  22   2  -1 6249.04 960.510   1
 -21   2   1 5897.37 945.616   4
 -20   2   1 1274.82 512.913   4
  20  -2  -1 1394.64 463.815   1
 -19   2   1 3247.06 674.746   4
  19  -2  -1 4324.78 698.205   1
  18  -2  -1 5481.87 800.988   2
  18  -2  -1 6517.98 811.871   1
 -18   2   1 6320.28 908.188   4
  17  -2  -1 1604.57 476.469   2
 -17   2   1 1994.43 508.100   4
 -17  -2   1 2704.76 600.613   4
 -16   2   1 27876.5 1697.09   4
 -16  -2   1 30363.5 1721.25   4
  16  -2  -1 32507.2 1661.13   1
  16  -2  -1 28759.0 1701.29   2
  15  -2  -1 31436.6 1740.51   2
 -15  -2   1 32901.2 1747.31   4
 -15   2   1 35106.8 1822.79   4
 -14  -2   1 1102.24 394.131   4
  14  -2  -1 423.345 242.265   1
  14  -2  -1 170.747 288.527   2
 -14   2   1 41.5720 399.313   4
 -13  -2   1 2865.23 514.123   4
  13  -2  -1 1802.33 394.570   2
 -13   2   1 2050.62 441.860   4
  13  -2  -1 2490.70 434.571   1
 -12  -2   1 33025.1 1525.99   4
 -12   2   1 32591.8 1536.47   4
  12  -2  -1 30118.2 1394.80   1
  12  -2  -1 28791.8 1469.72   2
  11  -2  -1 2398.69 433.995   2
 -11   2   1 2901.06 465.709   4
 -11  -2   1 3228.45 514.930   4
  11  -2  -1 2107.43 379.467   1
  10  -2  -1 113092. 3106.88   2
 -10  -2   1 115750. 3084.02   4
  -9  -2   1 428.469 254.525   4
   9  -2  -1 470.797 198.665   2
   8  -2  -1 48202.0 1636.42   2
   8  -2  -1 47149.3 1509.02   1
  -8  -2   1 47477.2 1583.78   4
   7  -2  -1 81693.7 2226.73   2
  -7  -2   1 79596.0 2164.63   4
   7  -2  -1 87119.8 2145.34   1
  -6  -2   1 104635. 2456.00   4
   6  -2  -1 108430. 2546.03   2
  -5   2   1 10479.3 462.034   3
   5  -2  -1 11307.8 540.266   1
  -5  -2   1 10591.4 546.240   4
   5  -2  -1 11442.0 579.949   2
   4  -2  -1 49332.0 1336.73   2
  -4   2   1 51374.0 1177.35   3
   4  -2  -1 48997.3 1301.87   1
  -4   2   1 52558.4 1375.82   2
   4   2  -1 49167.1 1312.79   4
   3  -2  -1 129654. 2661.81   2
  -3   2   1 135805. 2666.90   1
  -3   2   1 131042. 2671.63   2
  -2   2   1 23553.0 681.586   2
   2  -2  -1 23712.4 685.102   2
  -2   2   1 25256.4 711.602   1
   0   2  -1 4535.81 241.062   5
  -1  -2  -1 178114. 3384.14   3
   1  -2   1 180595. 3301.93   3
   1  -2   1 178853. 3452.18   2
   1   2   1 180702. 3376.17   3
   1  -2   1 175294. 3427.29   5
  -1   2  -1 180115. 3305.80   3
  -1   2  -1 182019. 3455.27   2
  -2   2  -1 45225.5 990.017   1
  -2   2  -1 48874.9 1193.23   2
   2  -2   1 46802.4 1053.16   3
   2  -2   1 46481.6 1179.38   2
  -2  -2  -1 44837.4 1142.85   3
  -2   2  -1 46296.8 1056.04   3
  -3   2  -1 17748.6 598.349   3
   3  -2   1 17173.6 596.966   3
  -3  -2  -1 18828.7 688.925   3
   3   2   1 18257.4 683.734   3
  -3   2  -1 17913.7 688.345   2
   3  -2   1 17341.7 680.490   2
   3   2   1 18383.3 629.021   4
  -3  -2  -1 18038.7 602.762   2
   4  -2   1 52070.3 1215.86   1
   4  -2   1 47570.0 1379.09   2
  -4   2  -1 51332.8 1286.95   3
  -4  -2  -1 50427.4 1296.30   2
   4   2   1 47891.6 1375.15   3
   4  -2   1 47336.5 1270.08   3
  -4  -2  -1 49806.4 1316.33   4
   4   2   1 48170.9 1308.71   4
   5   2   1 6841.70 476.977   3
   5  -2   1 6857.19 427.180   3
  -5  -2  -1 7256.78 449.201   4
   5  -2   1 7584.57 395.041   1
   5  -2   1 7436.33 493.023   2
   6   2   1 192532. 4248.59   3
   6  -2   1 193701. 4253.92   2
  -6  -2  -1 202535. 4162.98   4
   6  -2   1 198556. 4123.96   3
  -7  -2  -1 78508.5 2133.82   4
   7  -2   1 79650.5 2117.94   3
   7  -2   1 79505.1 2245.77   2
  -8  -2  -1 687.079 231.348   4
   8  -2   1 325.396 254.198   2
   8  -2   1 557.372 235.782   3
  -9  -2  -1 7168.93 597.642   4
   9  -2   1 6914.93 592.578   3
   9  -2   1 6869.19 615.416   2
  10  -2   1 107110. 3095.59   2
 -10  -2  -1 113485. 3054.39   4
  11  -2   1 968.207 310.197   2
 -11  -2  -1 1480.73 407.752   4
 -12  -2  -1 19811.7 1188.85   4
 -12   2  -1 18995.2 1184.14   4
  12  -2   1 19409.6 1210.66   2
  13  -2   1 4342.23 613.266   2
 -13   2  -1 5026.94 649.843   4
 -13  -2  -1 4953.77 648.327   4
  13  -2   1 5129.33 569.283   1
  14  -2   1 12245.8 907.052   1
 -14  -2  -1 12520.7 1021.11   4
 -14   2  -1 10495.9 979.518   4
  14  -2   1 10568.2 964.260   2
 -15   2  -1 33661.5 1820.72   4
  15  -2   1 33587.3 1830.10   2
  15  -2   1 38840.3 1712.07   1
 -15  -2  -1 32423.8 1752.31   4
  16  -2   1 11509.3 1077.05   2
 -16   2  -1 10871.0 1066.24   4
 -16  -2  -1 11563.1 1077.92   4
  16  -2   1 12403.8 992.936   1
  17  -2   1 9987.05 920.857   1
 -17   2  -1 9901.73 1049.27   4
  17  -2   1 10450.7 1074.47   2
  18  -2   1 2824.71 529.960   1
 -18   2  -1 2754.65 636.848   4
  18  -2   1 1327.68 500.057   2
 -19   2  -1 7648.58 1019.16   4
 -20   2  -1 2874.09 684.632   4
 -21   3   1 8311.49 1120.39   4
 -20   3   1 40166.6 2356.35   4
  20  -3  -1 41881.3 2168.43   1
  19  -3  -1 2273.94 705.053   2
 -19   3   1 1853.12 669.244   4
  19  -3  -1 3331.60 682.396   1
  18  -3  -1 38156.1 1963.21   1
 -18   3   1 37468.3 2126.65   4
  18  -3  -1 36646.5 2098.23   2
  17  -3  -1 24791.6 1652.20   2
  17  -3  -1 27248.7 1572.81   1
 -17   3   1 23889.0 1637.26   4
  16  -3  -1 28227.9 1690.02   2
  16  -3  -1 31456.6 1631.70   1
 -16   3   1 29005.5 1731.62   4
  15  -3  -1 12315.9 1084.65   2
 -15   3   1 10359.2 1017.71   4
  15  -3  -1 11156.5 943.076   1
 -14   3   1 36625.5 1834.37   4
  14  -3  -1 36625.3 1825.76   2
  14  -3  -1 39795.1 1717.78   1
  13  -3  -1 50568.6 1919.19   1
 -13   3   1 47644.0 2037.43   4
  13  -3  -1 47181.4 2026.65   2
  12  -3  -1 1351.83 382.427   2
  12  -3  -1 1590.45 369.445   1
  11  -3  -1 139113. 3443.33   1
  11  -3  -1 126921. 3570.31   2
  10  -3  -1 68019.0 2100.82   1
  10  -3  -1 69144.4 2277.24   2
   9  -3  -1 4756.15 464.171   1
   9  -3  -1 3786.71 469.894   2
   8  -3  -1 18720.6 873.249   1
   8  -3  -1 19594.6 991.660   2
   7  -3  -1 20358.7 875.098   1
   7  -3  -1 20825.1 969.283   2
   6  -3  -1 80054.0 2154.81   2
  -6   3   1 82263.3 1875.22   3
   6  -3  -1 79717.0 2036.52   1
   5  -3  -1 197924. 4204.01   2
   5  -3  -1 208104. 4111.06   1
  -5   3   1 199532. 3865.20   3
   4  -3  -1 679.073 160.399   2
   4  -3  -1 733.534 150.949   1
  -4   3   1 425.542 115.372   1
  -4   3   1 390.670 83.0898   3
   3  -3  -1 12296.4 544.216   2
  -3   3   1 13539.6 566.318   2
  -3   3   1 12673.7 534.354   1
  -3   3   1 12074.9 343.820   3
  -2   3   1 42159.7 1095.60   2
   2  -3  -1 41866.4 917.130   5
   2  -3  -1 42165.8 1090.69   2
  -1   3   1 38350.9 835.297   5
   1  -3  -1 38087.0 952.581   2
   0   3  -1 6047.17 318.340   5
   0   3   1 6463.43 246.999   3
   0  -3   1 5927.27 320.276   5
   0  -3  -1 6106.74 246.612   3
  -1   3  -1 106214. 2276.00   5
   1  -3   1 107602. 2322.85   2
   1   3   1 108645. 2185.17   3
   1  -3   1 110149. 2274.02   5
  -1  -3  -1 108400. 2199.28   3
   1  -3   1 109184. 2094.26   3
  -2  -3  -1 2285.29 214.967   3
   2   3   1 2031.19 208.574   3
  -2   3  -1 1789.82 151.184   3
   2  -3   1 1736.61 148.190   3
   2  -3   1 2114.87 233.432   2
   3  -3   1 65826.1 1462.25   3
   3   3   1 65239.9 1623.64   3
  -3   3  -1 65604.2 1463.84   3
  -3  -3  -1 64706.8 1629.11   3
  -3   3  -1 65170.1 1458.95   1
   3  -3   1 63426.0 1666.88   2
  -4  -3  -1 5474.20 345.349   2
   4  -3   1 5158.36 312.582   1
   4  -3   1 4659.43 379.078   2
   4  -3   1 4986.06 318.319   3
   4   3   1 4964.56 381.574   3
  -4   3  -1 5351.62 323.293   3
   5  -3   1 269229. 5199.18   1
   5  -3   1 260829. 5501.31   2
   5  -3   1 273371. 5270.91   3
   6  -3   1 24238.0 859.932   1
   6  -3   1 24651.8 1063.35   2
   6  -3   1 24421.2 915.351   3
   7  -3   1 20432.1 879.232   3
   7  -3   1 18217.2 963.952   2
   7  -3   1 20393.5 825.909   1
   8  -3   1 128779. 3374.26   2
   8  -3   1 137200. 3083.48   1
   8  -3   1 133225. 3190.46   3
   9  -3   1 89310.2 2661.62   2
  -9  -3  -1 92498.2 2568.76   4
   9  -3   1 93519.6 2512.19   3
   9  -3   1 86977.2 2349.12   1
  10  -3   1 79238.3 2605.44   2
 -10  -3  -1 84497.7 2547.87   4
 -11  -3  -1 159731. 4046.96   4
  11  -3   1 161115. 3811.87   1
  11  -3   1 152676. 4124.95   2
  12  -3   1 230.980 212.834   1
  12  -3   1 38.9063 267.338   2
 -12  -3  -1 338.166 296.864   4
 -13   3  -1 76712.0 2766.58   4
  13  -3   1 83271.6 2532.84   1
  13  -3   1 78258.4 2790.94   2
 -14   3  -1 15563.9 1219.63   4
  14  -3   1 17361.6 1071.47   1
  14  -3   1 17729.2 1280.89   2
  15  -3   1 5416.78 638.614   1
  15  -3   1 4920.69 712.963   2
 -15   3  -1 4396.50 691.199   4
 -16   3  -1 74300.0 2951.44   4
  16  -3   1 73282.6 2979.89   2
  16  -3   1 78207.6 2696.11   1
  17  -3   1 5295.07 842.901   2
 -17   3  -1 5564.17 841.247   4
  17  -3   1 7575.66 812.639   1
 -18   3  -1 53937.5 2608.79   4
  18  -3   1 49430.1 2529.95   2
  19  -3   1 381.587 548.860   2
 -19   3  -1 1542.38 636.386   4
  20  -3   1 21904.9 1717.73   2
 -20   3  -1 18718.5 1628.94   4
 -21   4   1 1700.88 663.832   4
  20  -4  -1 3109.24 765.820   2
 -20   4   1 3509.23 828.073   4
  19  -4  -1 96876.4 3386.75   1
  19  -4  -1 88903.7 3575.37   2
 -19   4   1 85444.3 3532.42   4
  18  -4  -1 1394.30 565.963   2
 -18   4   1 1787.01 672.385   4
  18  -4  -1 1175.53 475.601   1
  17  -4  -1 26756.6 1730.99   2
 -17   4   1 27087.8 1734.67   4
  17  -4  -1 27155.2 1569.23   1
 -16   4   1 11035.9 1064.87   4
  16  -4  -1 11904.9 997.392   1
  16  -4  -1 12445.7 1118.77   2
  15  -4  -1 6191.07 693.536   1
 -15   4   1 4278.20 667.605   4
  15  -4  -1 5622.56 762.845   2
  14  -4  -1 92387.6 2855.21   1
  14  -4  -1 81089.3 2958.11   2
  13  -4  -1 457.802 325.413   2
  13  -4  -1 413.941 279.460   1
  12  -4  -1 26540.9 1292.06   1
  12  -4  -1 23113.1 1360.11   2
  11  -4  -1 34356.2 1627.32   2
  11  -4  -1 42508.8 1595.65   1
  10  -4  -1 27355.5 1206.28   1
  10  -4  -1 26234.9 1322.62   2
   9  -4  -1 7962.13 681.459   2
   9  -4  -1 9115.18 637.660   1
   8  -4  -1 15077.9 798.461   1
   8  -4  -1 15102.5 911.504   2
   7  -4  -1 11878.5 749.114   2
   7  -4  -1 12327.7 677.656   1
   6  -4  -1 12867.2 726.749   2
   6  -4  -1 12031.9 638.806   1
  -6   4   1 13097.4 525.754   3
   5  -4  -1 65437.9 1877.15   2
  -5   4   1 71974.2 1539.83   3
  -4   4   1 171543. 3159.81   3
   4  -4  -1 167688. 3622.84   2
   3  -4  -1 461316. 8557.17   2
   3  -4  -1 447969. 8266.48   5
  -2   4   1 94722.1 2071.56   2
   2  -4  -1 88175.2 1824.45   5
   2  -4  -1 89147.4 2030.18   2
  -2   4   1 90249.7 1836.91   5
   1   4  -1 140666. 2966.70   5
  -1   4   1 143436. 2793.29   5
   0  -4  -1 455.097 81.9072   3
   0   4  -1 276.236 119.082   5
   1  -4   1 8931.44 331.346   3
   1  -4   1 10195.6 468.480   5
  -1  -4  -1 9073.69 399.105   3
   1  -4   1 8648.23 473.013   2
  -1   4  -1 8700.70 443.700   5
   2  -4   1 178187. 3593.95   5
   2  -4   1 175772. 3670.83   2
  -2  -4  -1 174176. 3537.83   3
  -2   4  -1 174823. 3326.86   3
   2  -4   1 180010. 3327.06   3
  -3   4  -1 1535.73 152.686   3
   3  -4   1 1331.68 147.458   3
   3  -4   1 963.552 198.423   2
   4  -4   1 157943. 3574.12   2
  -4   4  -1 166066. 3271.65   1
   4  -4   1 158858. 3211.06   3
  -4   4  -1 161553. 3211.94   3
   5  -4   1 153551. 3263.53   3
   5  -4   1 154721. 3589.49   2
   6  -4   1 60629.1 1652.91   3
   6  -4   1 60207.1 1913.17   2
   7  -4   1 170938. 4090.12   2
   7  -4   1 170161. 3747.63   3
   7  -4   1 179264. 3742.90   1
   8  -4   1 328.848 189.468   2
   8  -4   1 332.911 152.110   1
   8  -4   1 557.489 197.501   3
   9  -4   1 7184.98 664.756   2
   9  -4   1 5628.65 517.031   3
   9  -4   1 5951.78 495.776   1
  10  -4   1 146715. 4075.70   2
  10  -4   1 168820. 3792.88   1
  11  -4   1 38270.4 1787.44   2
  11  -4   1 45444.0 1608.07   1
  12  -4   1 607.737 368.510   2
  12  -4   1 1352.50 310.969   1
  13  -4   1 14462.5 1124.25   2
  13  -4   1 16455.0 1002.31   1
  14  -4   1 69263.4 2742.62   2
  14  -4   1 75893.5 2474.54   1
  15  -4   1 29260.0 1469.97   1
  15  -4   1 28229.4 1698.88   2
 -16   4  -1 12458.5 1183.24   4
  16  -4   1 13790.8 1041.74   1
  16  -4   1 12460.3 1173.07   2
  17  -4   1 1937.07 458.209   1
  17  -4   1 2048.54 568.728   2
 -17   4  -1 3001.65 685.213   4
  18  -4   1 909.252 482.768   2
 -18   4  -1 1443.81 570.951   4
 -19   4  -1 52829.3 2723.11   4
  19  -4   1 55901.2 2761.68   2
 -20   4  -1 257.155 425.076   4
  20  -4   1 919.589 552.304   2
 -20   5   1-471.767 498.172   4
  20  -5  -1 53.5365 399.195   2
 -19   5   1 1780.72 601.109   4
  19  -5  -1 2647.39 664.263   2
  19  -5  -1 3561.25 636.061   1
  18  -5  -1 1830.65 573.517   2
  18  -5  -1 1605.23 464.745   1
 -18   5   1 1381.43 510.385   4
  17  -5  -1 868.092 383.443   1
  17  -5  -1 56.2817 316.854   2
 -17   5   1 1154.00 534.460   4
 -16   5   1 368.816 402.927   4
  16  -5  -1 440.056 315.674   2
  16  -5  -1 640.531 271.289   1
  15  -5  -1 137.620 310.448   2
  15  -5  -1 703.461 312.619   1
  14  -5  -1 3809.44 525.578   1
  14  -5  -1 3496.07 579.555   2
  13  -5  -1 23139.1 1247.10   1
  13  -5  -1 21399.3 1356.07   2
  12  -5  -1 2265.27 405.195   1
  12  -5  -1 2879.16 566.147   2
  11  -5  -1 17901.9 1010.86   1
  11  -5  -1 16735.1 1106.89   2
  10  -5  -1 35288.8 1594.34   2
  10  -5  -1 38363.8 1482.86   1
   9  -5  -1 12096.2 847.823   2
   9  -5  -1 12122.0 757.162   1
   8  -5  -1 1751.81 349.016   2
   8  -5  -1 2312.69 322.559   1
  -7   5   1 85510.8 1943.57   3
   7  -5  -1 80658.8 2397.78   2
   6  -5  -1 36671.4 1367.42   2
  -6   5   1 37614.6 992.330   3
  -5   5   1 17649.8 527.823   3
   5  -5  -1 16946.8 835.740   2
  -4   5   1 748.274 76.6230   3
   4  -5  -1 1116.28 164.119   5
   4  -5  -1 1161.43 220.860   2
   3  -5  -1 37887.4 1220.81   2
   3  -5  -1 39720.8 1027.93   5
   2  -5  -1 156204. 3332.16   2
  -2   5   1 160331. 3113.63   5
   2  -5  -1 158083. 3095.43   5
   1  -5  -1 31032.4 709.589   3
   1   5  -1 32977.7 1002.40   5
  -1   5   1 31130.1 863.006   5
   0   5  -1 5050.66 354.321   5
   0  -5   1 5418.08 359.747   5
   0  -5  -1 5554.99 273.894   3
   1  -5   1 135606. 2869.86   5
  -1   5  -1 133204. 2878.72   5
  -1  -5  -1 133643. 2724.99   3
   2  -5   1 135977. 2593.77   3
  -2   5  -1 134761. 2920.30   5
   2  -5   1 135941. 2909.34   5
  -2  -5  -1 132619. 2842.57   3
   2  -5   1 128485. 3006.75   2
   3  -5   1 37890.4 948.218   3
  -3   5  -1 38996.3 967.849   3
   3  -5   1 38115.2 1283.91   2
   4  -5   1 1978.20 310.631   2
   4  -5   1 1855.77 188.206   3
  -4   5  -1 2161.69 198.577   3
  -4   5  -1 2029.02 227.762   1
   5  -5   1 22414.5 768.523   3
   5  -5   1 22115.1 1023.75   2
  -5   5  -1 22041.9 754.684   3
   6  -5   1 33729.6 1072.76   3
   6  -5   1 33803.6 1359.65   2
   7  -5   1 13705.8 854.388   2
   7  -5   1 13444.2 674.118   3
   8  -5   1 1016.91 214.308   1
   8  -5   1 938.101 213.356   3
   8  -5   1 1363.12 355.522   2
   9  -5   1 1570.73 280.264   3
   9  -5   1 1817.63 386.481   2
   9  -5   1 1627.57 274.108   1
  10  -5   1 5109.62 486.299   1
  10  -5   1 4577.85 593.285   2
  11  -5   1 7417.66 779.597   2
  11  -5   1 6531.96 588.835   1
  12  -5   1 5102.52 548.031   1
  12  -5   1 5345.04 702.858   2
  13  -5   1 2657.11 420.888   1
  13  -5   1 2776.72 547.146   2
  14  -5   1 1465.49 417.908   2
  14  -5   1 512.063 242.726   1
  15  -5   1-278.910 390.872   2
  15  -5   1-267.902 329.276   1
  16  -5   1 1359.57 347.497   1
  16  -5   1 1128.47 423.434   2
 -16   5  -1 484.662 421.387   4
 -17   5  -1 578.786 440.519   4
  17  -5   1 528.104 416.898   2
  18  -5   1 683.028 497.994   2
 -18   5  -1 236.422 490.285   4
  19  -5   1 1077.12 477.782   2
 -19   5  -1 1856.87 642.799   4
 -20   5  -1 2635.75 704.825   4
  20  -5   1 3494.34 745.697   2
 -20   6   1 749.995 527.175   4
  20  -6  -1 3984.16 817.272   2
  19  -6  -1 90597.9 3639.07   2
 -19   6   1 84954.9 3559.40   4
  18  -6  -1 7854.08 876.605   1
 -18   6   1 7663.33 1027.91   4
  18  -6  -1 6166.77 913.954   2
  17  -6  -1 10621.7 1099.07   2
  17  -6  -1 11855.4 1043.38   1
 -17   6   1 9431.62 1056.53   4
  16  -6  -1 9827.29 896.576   1
  16  -6  -1 8472.28 968.075   2
  15  -6  -1 3679.84 564.468   1
  15  -6  -1 3114.84 576.778   2
  14  -6  -1 51015.4 2288.74   2
  14  -6  -1 49649.7 2005.38   1
  13  -6  -1 52076.0 2252.61   2
  13  -6  -1 55870.1 2064.69   1
  12  -6  -1 1799.79 477.968   2
  12  -6  -1 1911.32 381.020   1
  11  -6  -1 51434.7 2068.66   2
  11  -6  -1 50461.1 1845.89   1
  10  -6  -1 6138.11 649.024   2
   9  -6  -1 6307.09 659.239   2
   8  -6  -1 8570.10 712.874   2
   7  -6  -1 3027.25 415.942   2
  -7   6   1 2743.92 249.783   3
   6  -6  -1 31085.3 1300.22   2
  -6   6   1 33137.3 862.017   3
   5  -6  -1 13143.1 771.328   2
  -5   6   1 13635.9 409.715   3
   5  -6  -1 13598.4 613.137   5
   4  -6  -1 112929. 2503.34   5
   4  -6  -1 121502. 2855.22   2
   3  -6  -1 50851.1 1525.30   2
   3  -6  -1 49272.5 1276.09   5
  -2   6   1 91469.4 2063.69   5
   2  -6  -1 99050.8 2325.29   2
   1   6  -1 111252. 2491.85   5
  -1   6   1 112480. 2319.56   5
   1  -6  -1 103935. 2467.08   2
   1  -6  -1 104535. 2064.85   3
   0  -6  -1 1770.84 162.936   3
   0   6  -1 1529.55 220.343   5
  -1   6  -1 8298.76 496.751   5
  -1  -6  -1 9025.87 433.367   3
   2  -6   1 339751. 6096.32   3
  -2   6  -1 332281. 6511.57   5
   2  -6   1 332611. 6677.63   2
   3  -6   1 49991.2 1157.62   3
   3  -6   1 48901.1 1589.72   2
  -4   6  -1 349923. 6290.31   3
   4  -6   1 335389. 6276.93   3
   4  -6   1 337055. 6943.16   2
   5  -6   1 23158.6 767.780   3
  -5   6  -1 22922.8 763.049   3
   5  -6   1 23281.2 1105.46   2
   6  -6   1 9861.49 723.293   2
   6  -6   1 10084.6 516.788   3
   7  -6   1 41828.9 1649.83   2
   7  -6   1 40485.7 1266.36   3
   8  -6   1 546.160 220.198   2
   8  -6   1 227.661 137.785   3
   9  -6   1 29097.7 1169.61   3
   9  -6   1 32358.0 1524.45   2
  10  -6   1 91001.1 2943.44   2
  11  -6   1 20367.7 1302.99   2
  12  -6   1 246.278 345.495   2
  13  -6   1 12636.8 887.075   1
  13  -6   1 12126.6 1060.02   2
  14  -6   1 44395.0 1800.06   1
  14  -6   1 37712.7 2003.50   2
  15  -6   1 4033.05 677.431   2
  15  -6   1 5072.36 597.387   1
  16  -6   1 2974.36 525.257   1
  16  -6   1 2587.61 597.976   2
 -17   6  -1 315.431 404.304   4
  17  -6   1 1077.17 447.666   2
  18  -6   1 3485.19 743.885   2
 -18   6  -1 4226.28 818.505   4
  19  -6   1 40847.0 2402.71   2
 -19   6  -1 45715.7 2536.50   4
 -20   6  -1 9767.72 1216.43   4
  20  -7  -1 11559.7 1297.91   2
 -20   7   1 10635.1 1263.08   4
 -19   7   1 199.919 528.610   4
  19  -7  -1 299.263 407.812   2
 -18   7   1 7223.20 972.303   4
  18  -7  -1 6128.60 924.507   2
  17  -7  -1 6244.55 892.015   2
  16  -7  -1 16135.7 1343.48   2
  15  -7  -1 11969.2 1123.90   2
  14  -7  -1 3231.66 608.024   2
  13  -7  -1 232.585 320.280   2
  12  -7  -1 10958.3 971.573   2
  11  -7  -1 122870. 3649.45   2
  10  -7  -1 114.794 273.746   2
   9  -7  -1 23182.1 1272.76   2
   8  -7  -1 309.710 291.557   2
  -8   7   1 876.025 151.595   3
  -7   7   1 21929.1 689.796   3
   7  -7  -1 21310.2 1133.62   2
  -6   7   1 263194. 4823.10   3
   6  -7  -1 266187. 5732.26   2
   5  -7  -1 17096.0 918.720   2
   4  -7  -1 54405.1 1736.96   2
   4  -7  -1 55360.8 1465.66   5
   3  -7  -1 66439.5 1650.46   5
  -3   7   1 66878.6 1676.89   5
   3  -7  -1 67145.8 1923.30   2
   2  -7  -1 219891. 4629.89   2
  -2   7   1 218481. 4340.60   5
   1   7  -1 16876.0 766.221   5
  -1   7   1 17359.7 689.287   5
   1  -7  -1 16414.7 503.232   3
   0   7  -1 3800.14 353.120   5
   0  -7  -1 3522.30 242.287   3
  -1   7  -1 12797.9 397.222   6
  -1   7  -1 14176.6 697.352   5
  -1  -7  -1 14130.2 582.676   3
  -1  -7  -1 13511.0 400.807   6
   2  -7   1 172423. 4004.68   2
  -2   7  -1 176463. 3851.64   5
   2  -7   1 180232. 3391.66   3
   3  -7   1 23519.2 669.419   3
   3  -7   1 23065.0 1057.43   2
   4  -7   1 458.398 101.273   3
   4  -7   1 197.735 207.655   2
   5  -7   1 68047.0 2126.38   2
   5  -7   1 64051.3 1536.85   3
  -5   7  -1 65390.0 1545.99   3
  -6   7  -1 78965.8 1855.10   3
   6  -7   1 75951.6 2407.11   2
   6  -7   1 77574.6 1854.72   3
   7  -7   1 38671.8 1195.64   3
   7  -7   1 36673.4 1583.99   2
   8  -7   1 895.006 203.779   3
   8  -7   1 639.764 282.786   2
   9  -7   1 744.412 205.424   3
   9  -7   1 562.078 287.470   2
  10  -7   1 17620.7 1204.24   2
  11  -7   1 60169.1 2397.98   2
  12  -7   1 6063.13 747.266   2
  13  -7   1 8621.19 940.697   2
  14  -7   1 25406.6 1625.38   2
  15  -7   1-180.212 369.883   2
  16  -7   1 3867.16 702.507   2
  17  -7   1 16361.3 1444.94   2
  18  -7   1 38291.9 2295.63   2
 -18   7  -1 36973.7 2248.23   4
  19  -7   1 782.252 468.910   2
 -19   7  -1-26.4974 490.574   4
  19  -8  -1 2136.40 673.981   2
 -19   8   1 729.430 466.480   4
  18  -8  -1 1538.76 549.612   2
  17  -8  -1-462.389 553.131   2
  16  -8  -1 65127.8 2879.55   2
  15  -8  -1 29917.4 1811.36   2
  14  -8  -1 658.096 452.319   2
  13  -8  -1 32237.6 1782.02   2
  12  -8  -1 43421.6 2044.34   2
  11  -8  -1 17778.7 1222.22   2
  10  -8  -1 69375.0 2529.24   2
   9  -8  -1 10611.6 878.727   2
  -8   8   1 99579.4 2135.47   3
   8  -8  -1 94704.0 2948.76   2
  -7   8   1 178194. 3414.99   3
   7  -8  -1 184191. 4426.70   2
   6  -8  -1 168458. 4106.76   2
   5  -8  -1 40692.5 1550.86   2
   4  -8  -1 150401. 3633.74   2
  -3   8   1 151267. 3252.24   5
   3  -8  -1 148572. 3551.41   2
   2  -8  -1 1356.55 262.752   2
  -2   8   1 1288.13 212.482   5
   1   8  -1 214165. 4472.17   5
   1  -8  -1 204797. 3913.38   3
  -1   8   1 211084. 4263.44   5
   1  -8  -1 210329. 4501.86   2
   0  -8  -1 17984.7 644.650   3
   0   8   1 18828.5 786.593   5
   0   8  -1 18738.3 848.717   5
  -1   8  -1 425482. 7405.30   5
  -1  -8  -1 433039. 7086.23   3
  -2   8  -1 415.698 199.051   5
   2  -8   1 603.543 262.981   2
   3  -8   1 74644.9 2236.94   2
   3  -8   1 72673.8 1571.09   3
   4  -8   1 79897.5 2401.26   2
   4  -8   1 79080.3 1711.28   3
   5  -8   1 4432.32 281.349   3
   5  -8   1 4815.58 567.041   2
   6  -8   1 49415.0 1313.64   3
   6  -8   1 50872.4 1918.62   2
  -6   8  -1 50776.5 1314.72   3
   7  -8   1 126131. 2790.52   3
   7  -8   1 128173. 3553.08   2
   8  -8   1 21095.4 1241.77   2
   8  -8   1 21460.3 870.324   3
   9  -8   1 1391.54 375.481   2
  10  -8   1 22409.2 1384.45   2
  11  -8   1 5304.26 687.108   2
  12  -8   1 16360.6 1244.02   2
  13  -8   1 4492.78 713.892   2
  14  -8   1 1910.54 542.229   2
  15  -8   1 11338.0 1170.97   2
  16  -8   1 31533.0 1979.17   2
  17  -8   1 15874.7 1443.82   2
  18  -8   1-547.292 506.102   2
 -19   8  -1-186.494 448.830   4
  19  -8   1 91.9185 338.071   2
  19  -9  -1 591.326 461.444   2
  18  -9  -1 3003.16 690.322   2
  17  -9  -1 1610.79 536.670   2
  16  -9  -1 3854.12 751.246   2
  15  -9  -1 29298.9 1842.73   2
  14  -9  -1 15847.3 1294.23   2
  13  -9  -1-65.9873 376.976   2
  12  -9  -1 42953.8 2060.51   2
  11  -9  -1 2167.19 474.290   2
  10  -9  -1 6381.23 735.961   2
   9  -9  -1 56538.7 2211.99   2
   8  -9  -1 20418.7 1209.29   2
  -8   9   1 20457.5 633.334   3
   7  -9  -1 140191. 3753.22   2
   6  -9  -1 4738.46 552.335   2
   5  -9  -1 8606.69 708.056   2
   4  -9  -1 34161.0 1426.36   2
  -3   9   1 1726.13 265.827   5
   3  -9  -1 1278.24 303.406   2
   2   9  -1 126375. 2937.18   5
   2  -9  -1 123735. 3006.53   2
  -2   9   1 121558. 2708.39   5
   1   9  -1-31.4246 170.656   5
   1  -9  -1 437.332 230.201   2
   1  -9  -1 336.118 87.5917   3
  -1   9   1 429.872 191.105   5
   0   9   1 6215.43 462.057   5
   0   9  -1 5419.78 475.215   5
   0  -9  -1 5287.23 341.887   3
  -1   9  -1 1507.01 306.532   5
  -2   9  -1 89829.3 2449.59   5
   2  -9   1 92069.2 2654.03   2
   2  -9   1 94994.3 1979.05   3
  -3   9  -1 16099.8 848.818   5
   3  -9   1 15747.6 941.123   2
   3  -9   1 15865.0 526.553   3
   4  -9   1 17151.7 557.535   3
   4  -9   1 17384.4 1017.53   2
   5  -9   1 694.855 117.329   3
   5  -9   1 189.770 260.231   2
   6  -9   1 3910.37 284.023   3
   6  -9   1 3296.18 496.506   2
   7  -9   1 118116. 2581.29   3
   7  -9   1 120586. 3456.77   2
  -7   9  -1 116160. 2554.91   3
   8  -9   1 3157.94 312.288   3
   8  -9   1 3184.74 535.707   2
   9  -9   1 71193.5 2626.64   2
  10  -9   1 48888.6 2170.45   2
  11  -9   1 185.061 363.255   2
  12  -9   1 62308.5 2633.65   2
  13  -9   1-163.755 397.737   2
  14  -9   1 45017.8 2322.23   2
  15  -9   1 20231.1 1562.20   2
  16  -9   1 220.452 359.314   2
  17  -9   1 9811.94 1156.70   2
  18  -9   1 4796.13 873.489   2
  19 -10  -1 7488.15 1072.17   2
  18 -10  -1 11226.9 1258.21   2
  17 -10  -1 437.502 506.457   2
  16 -10  -1 26909.4 1854.57   2
  15 -10  -1 12171.0 1228.86   2
  14 -10  -1 23023.2 1619.68   2
  13 -10  -1 782.732 396.308   2
  12 -10  -1 9935.37 1014.61   2
  11 -10  -1 34951.6 1844.80   2
  10 -10  -1 4111.37 602.200   2
   9 -10  -1 2496.38 542.379   2
   8 -10  -1 21729.6 1295.88   2
   7 -10  -1 32168.6 1557.33   2
   6 -10  -1 16010.9 1052.43   2
   5 -10  -1 1013.54 312.350   2
   4 -10  -1 2695.57 432.607   2
   3 -10  -1 21647.2 1114.11   2
  -3  10   1 21619.9 939.346   5
   2 -10  -1 2981.74 411.074   2
   2  10  -1 2116.41 356.692   5
  -2  10   1 2242.50 316.400   5
   2 -10  -1 2345.43 153.238   3
   1 -10  -1 9594.99 696.667   2
   1  10  -1 8656.70 636.261   5
  -1  10   1 8774.42 575.956   5
   1 -10  -1 8603.12 394.927   3
   0 -10  -1 1860.48 215.834   3
   0  10   1 1986.40 302.618   5
   0  10  -1 1928.99 316.641   5
  -1  10  -1 33670.0 1321.59   5
  -2  10  -1 20745.8 1009.82   5
   2 -10   1 21279.2 662.994   3
   2 -10   1 21961.3 1160.02   2
  -2 -10  -1 19281.0 533.312   6
  -3  10  -1 37410.4 1434.28   5
   3 -10   1 35877.0 1562.62   2
   3 -10   1 37227.3 942.753   3
   4 -10   1 3867.39 231.586   3
   4 -10   1 3807.34 503.369   2
   5 -10   1 12729.7 464.682   3
   5 -10   1 11101.5 910.076   2
   6 -10   1 4294.43 279.297   3
   6 -10   1 4262.77 563.766   2
   7 -10   1 63793.1 2432.06   2
   7 -10   1 63666.5 1559.77   3
   8 -10   1 13561.5 1084.32   2
   9 -10   1 9933.34 963.167   2
  10 -10   1 33630.1 1791.79   2
  11 -10   1 46113.3 2210.09   2
  12 -10   1 9566.01 1009.18   2
  13 -10   1 6853.20 915.240   2
  14 -10   1 24121.5 1703.87   2
  15 -10   1 20458.2 1597.28   2
  16 -10   1 14398.0 1397.28   2
  17 -10   1 13009.8 1365.84   2
  18 -10   1 13256.5 1418.56   2
  18 -11  -1 1283.67 517.928   2
  17 -11  -1 17627.4 1596.33   2
  16 -11  -1 3612.82 737.357   2
  15 -11  -1 15145.0 1380.21   2
  14 -11  -1 12664.5 1251.00   2
  13 -11  -1 23980.0 1659.69   2
  12 -11  -1 477.889 317.876   2
  11 -11  -1 5056.64 720.762   2
  10 -11  -1 14895.3 1182.06   2
   9 -11  -1 57287.9 2357.48   2
   8 -11  -1 96025.0 3127.72   2
   7 -11  -1 36893.9 1759.17   2
   6 -11  -1 24380.7 1351.15   2
   5 -11  -1 334.911 222.359   2
   4 -11  -1 4876.20 566.816   2
  -3 -11   1 18660.0 497.100   6
   3 -11  -1 22710.1 1168.26   2
  -3  11   1 21461.4 970.416   5
   3  11  -1 20569.5 1063.52   5
   2 -11  -1 46532.6 1761.78   2
  -2  11   1 47568.4 1534.70   5
   2 -11  -1 41747.9 986.228   3
   2  11  -1 47924.1 1690.01   5
   1 -11  -1 69895.0 1618.08   3
   1 -11  -1 70959.9 2266.95   2
  -1  11   1 70471.1 2029.93   5
   1  11  -1 72655.3 2192.31   5
   0 -11  -1 186.475 122.378   3
   0  11  -1 397.633 236.274   5
   0  11   1 241.295 187.562   5
  -1  11  -1 837.279 273.975   5
   1 -11   1 1480.53 386.225   2
   1  11   1 1013.53 262.933   5
   2 -11   1 35443.2 1603.29   2
   2 -11   1 37131.3 1005.02   3
  -2  11  -1 37535.7 1482.69   5
   3 -11   1 20453.1 622.683   3
  -3  11  -1 20984.2 1061.24   5
   3 -11   1 18581.9 1132.00   2
   4 -11   1 16986.4 526.342   3
   4 -11   1 19162.7 1171.30   2
   5 -11   1 421.944 83.4810   3
   5 -11   1 25.3772 249.430   2
   6 -11   1 7357.83 341.643   3
   6 -11   1 7502.96 780.496   2
   7 -11   1 46514.3 2080.71   2
   8 -11   1 80362.2 2896.87   2
   9 -11   1 3639.34 625.597   2
  10 -11   1 7848.68 890.317   2
  11 -11   1 4250.78 709.776   2
  12 -11   1-381.335 474.250   2
  13 -11   1 36838.1 2119.44   2
  14 -11   1 22332.2 1658.18   2
  15 -11   1 28366.1 1946.36   2
  16 -11   1 14658.6 1422.81   2
  17 -11   1 1254.10 545.438   2
  18 -12  -1 2410.75 734.897   2
  17 -12  -1 8750.50 1163.38   2
  16 -12  -1 2683.51 685.077   2
  15 -12  -1 52123.5 2642.97   2
  14 -12  -1 3074.13 698.644   2
  13 -12  -1 18701.1 1470.16   2
  12 -12  -1 1677.28 519.689   2
  11 -12  -1 10357.4 1051.81   2
  10 -12  -1 32415.8 1801.97   2
   9 -12  -1 59535.4 2442.11   2
   8 -12  -1 15397.5 1146.18   2
   7 -12  -1 200.555 345.689   2
   6 -12  -1 36801.6 1764.94   2
   5 -12  -1 54340.4 2122.79   2
   4 -12  -1 30407.5 1506.67   2
  -4  12   1 31578.4 1266.77   5
   3  12  -1 1173.89 320.803   5
   3 -12  -1 1553.24 367.183   2
  -3  12   1 1398.68 295.323   5
  -2  12   1 704.063 249.738   5
   2  12  -1-131.012 231.598   5
   2 -12  -1 634.898 359.299   2
   2 -12  -1 262.656 67.0005   3
   1  12  -1 6394.73 600.621   5
   1 -12  -1 6263.67 656.989   2
   1 -12  -1 5833.70 347.381   3
  -1  12   1 5039.62 498.355   5
   0  12  -1 155043. 3860.40   5
   0  12   1 158624. 3754.26   5
   1  12   1 26271.1 1200.39   5
   1 -12   1 29268.5 1462.41   2
  -1  12  -1 28790.6 1299.11   5
   2 -12   1 920.683 154.152   3
  -2  12  -1 1015.34 333.994   5
   2 -12   1 1195.20 348.122   2
  -3  12  -1 448.439 79.3967   6
   3 -12   1 299.865 79.4584   3
  -3  12  -1 88.4259 229.901   5
   3 -12   1 293.502 330.248   2
  -3 -12  -1 394.754 80.3357   6
   4 -12   1 14656.7 1061.50   2
   4 -12   1 12671.1 413.091   3
   5 -12   1 23253.3 583.881   3
   5 -12   1 27925.3 1500.37   2
   6 -12   1 88797.1 3047.86   2
   7 -12   1 22738.3 1433.54   2
   8 -12   1 23494.3 1505.56   2
   9 -12   1 2625.99 575.865   2
  10 -12   1 55463.3 2531.65   2
  11 -12   1 12556.2 1166.81   2
  12 -12   1 2351.92 595.220   2
  13 -12   1 3258.14 713.287   2
  14 -12   1 33226.5 2071.07   2
  15 -12   1 33263.8 2149.59   2
  16 -12   1 6691.02 1025.14   2
  17 -12   1 1689.12 585.723   2
  17 -13  -1 3443.74 813.669   2
  16 -13  -1 9668.08 1190.13   2
  15 -13  -1 5920.23 908.454   2
  14 -13  -1 13640.8 1336.01   2
  13 -13  -1 7306.43 1003.81   2
  12 -13  -1 596.240 418.253   2
  11 -13  -1 50487.5 2398.23   2
  10 -13  -1 23719.9 1556.49   2
   9 -13  -1 2337.83 555.913   2
   8 -13  -1 5614.14 748.637   2
   7 -13  -1 340.527 318.821   2
   6 -13  -1 4118.29 617.668   2
   5 -13  -1 38882.5 1808.67   2
   4  13  -1 30418.5 1467.80   5
   4 -13  -1 29385.7 1548.56   2
  -4  13   1 29727.9 1292.27   5
   3  13  -1 12588.5 912.313   5
   3 -13  -1 11766.9 962.260   2
  -3  13   1 11806.0 780.969   5
  -2  13   1 801.550 264.489   5
   2  13  -1 300.787 271.895   5
   2 -13  -1 920.137 343.195   2
   1  13  -1 4145.90 514.431   5
   1 -13  -1 4102.58 536.340   2
  -1  13   1 3250.71 420.214   5
   0  13  -1 1674.60 402.456   5
   0  13   1 1592.71 363.572   5
   1 -13   1 33099.9 1637.72   2
  -1  13  -1 31565.0 1442.24   5
   1  13   1 33638.5 1415.81   5
   2  13   1 28252.2 1320.85   5
  -2  13  -1 30309.5 1396.31   5
   2 -13   1 29087.9 1544.54   2
   2 -13   1 29217.4 874.336   3
   3 -13   1 11281.8 428.005   3
   3 -13   1 12226.9 989.438   2
  -3  13  -1 13109.9 914.047   5
   4 -13   1 437.233 312.842   2
   5 -13   1 55414.3 2301.65   2
   6 -13   1 40816.2 1969.84   2
   7 -13   1-176.620 407.558   2
   8 -13   1 2016.95 537.064   2
   9 -13   1 4917.27 737.027   2
  10 -13   1 20670.1 1529.82   2
  11 -13   1 54523.6 2582.90   2
  12 -13   1-478.167 475.465   2
  13 -13   1 33425.9 2101.16   2
  14 -13   1 4849.75 829.859   2
  15 -13   1 1794.64 608.564   2
  16 -13   1 17773.1 1649.81   2
  16 -14  -1-330.297 577.495   2
  15 -14  -1 6287.03 970.931   2
  14 -14  -1 24925.0 1831.33   2
  13 -14  -1 3462.08 713.271   2
  12 -14  -1 33812.3 2063.01   2
  11 -14  -1 1116.02 525.218   2
  10 -14  -1 8604.55 998.346   2
   9 -14  -1 22170.0 1513.98   2
   8 -14  -1 25090.5 1588.17   2
   7 -14  -1 4212.80 651.879   2
   6 -14  -1 833.654 328.465   2
   5 -14  -1 55748.2 2307.75   2
   4 -14  -1 36058.6 1788.96   2
   4  14  -1 40212.2 1752.65   5
  -4  14   1 37327.1 1516.62   5
   3  14  -1 122892. 3437.42   5
  -3  14   1 117137. 3173.59   5
   3 -14  -1 114160. 3547.68   2
  -2  14   1 9805.60 753.732   5
   2  14  -1 9497.99 807.898   5
   2 -14  -1 9725.38 875.408   2
   1 -14  -1 1914.06 442.827   2
   1  14  -1 2283.72 414.974   5
  -1  14   1 2538.94 412.125   5
   0  14  -1 159156. 4055.79   5
   0  14   1 154525. 3908.40   5
   0 -14  -1 153739. 4191.84   2
  -1  14  -1 13659.0 961.818   5
   1 -14   1 12870.7 1041.78   2
   1  14   1 12394.8 887.300   5
   2 -14   1 49473.2 2129.10   2
  -2  14  -1 47474.4 1901.92   5
   2  14   1 46570.5 1839.25   5
  -3  14  -1 67562.7 2346.71   5
   3 -14   1 71091.8 2660.76   2
   4 -14   1 7636.57 836.609   2
   5 -14   1 60821.5 2512.59   2
   6 -14   1-238.323 343.179   2
   7 -14   1-1712.54 496.243   2
   8 -14   1 23984.5 1594.95   2
   9 -14   1 1619.86 518.830   2
  10 -14   1 11835.4 1190.85   2
  11 -14   1-141.344 476.227   2
  12 -14   1 326.796 474.232   2
  13 -14   1-164.152 443.501   2
  14 -14   1 1192.15 485.459   2
  15 -14   1-1114.04 570.954   2
  16 -15  -1 6259.27 1004.44   2
  15 -15  -1 3885.33 815.666   2
  14 -15  -1 16342.9 1505.20   2
  13 -15  -1 998.395 450.670   2
  12 -15  -1 20837.2 1624.86   2
  11 -15  -1 9499.85 1083.96   2
  10 -15  -1 46491.9 2359.00   2
   9 -15  -1 5201.50 751.678   2
   8 -15  -1 797.311 365.744   2
   7 -15  -1 31709.4 1815.35   2
   6 -15  -1 47978.5 2233.83   2
   5 -15  -1 70155.3 2726.44   2
   5  15  -1 72021.8 2613.10   5
   4 -15  -1 11675.6 1048.87   2
   4  15  -1 11598.5 964.286   5
   3  15  -1 27734.2 1479.02   5
   3 -15  -1 30121.1 1641.21   2
  -3  15   1 28059.1 1352.76   5
   2 -15  -1 44198.3 1987.91   2
   2  15  -1 41366.3 1835.33   5
  -2  15   1 42801.0 1711.61   5
  -1  15   1 64932.6 2214.01   5
   1  15  -1 65995.1 2348.70   5
   1 -15  -1 62936.4 2457.78   2
   0  15   1 1532.67 395.805   5
   0 -15   1 1969.02 429.548   2
   0 -15  -1 1291.98 442.107   2
   0  15  -1 1638.81 419.941   5
  -1  15  -1 45622.8 1898.12   5
   1 -15   1 44665.1 2081.76   2
   1  15   1 44839.5 1811.94   5
  -2  15  -1 33360.6 1595.47   5
   2 -15   1 34297.8 1815.57   2
   2  15   1 34321.6 1570.78   5
   3 -15   1 31232.2 1768.83   2
   3  15   1 31257.3 1526.91   5
  -3  15  -1 30878.7 1520.67   5
   4 -15   1 12012.7 1091.71   2
   5 -15   1 21474.9 1485.64   2
   6 -15   1 12147.2 1135.20   2
   7 -15   1 3985.43 710.353   2
   8 -15   1 8197.41 966.749   2
   9 -15   1 1234.58 475.569   2
  10 -15   1 12285.3 1260.57   2
  11 -15   1 473.869 394.250   2
  12 -15   1 11890.3 1266.01   2
  13 -15   1 2820.91 698.412   2
  14 -15   1-426.336 465.039   2
  15 -15   1-662.360 626.281   2
  15 -16  -1 4953.24 913.297   2
  14 -16  -1 419.874 482.254   2
  13 -16  -1 46123.6 2584.28   2
  12 -16  -1 36455.1 2231.37   2
  11 -16  -1-22.9030 398.535   2
  10 -16  -1 91.3607 369.394   2
   9 -16  -1 6601.95 910.244   2
   8 -16  -1-191.175 456.948   2
   7 -16  -1 3263.39 643.815   2
   6  16  -1-806.850 496.130   5
   6 -16  -1 30.3726 324.775   2
   5  16  -1 3128.72 575.139   5
   5 -16  -1 2303.49 573.413   2
   4  16  -1 19230.9 1273.71   5
   4 -16  -1 21757.9 1463.06   2
  -3  16   1 54749.7 2052.85   5
   3  16  -1 54960.4 2221.32   5
   3 -16  -1 55608.4 2375.75   2
  -2  16   1 35647.6 1587.87   5
   2 -16  -1 32788.0 1767.27   2
   2  16  -1 34345.3 1689.91   5
  -1  16   1 2689.19 455.661   5
   1 -16  -1 2353.58 537.095   2
   1  16  -1 2518.07 481.580   5
   0  16  -1 25.2408 292.204   5
   0  16   1 226.334 279.466   5
   0 -16   1-293.096 397.975   2
   0 -16  -1 249.555 315.852   2
   1  16   1 5630.29 653.043   5
   1 -16   1 5377.05 747.243   2
  -1  16  -1 5158.40 642.781   5
   2  16   1 12378.8 961.882   5
   2 -16   1 12956.0 1113.51   2
  -2  16  -1 12685.2 982.505   5
   3  16   1 153400. 4231.79   5
   3 -16   1 150830. 4577.96   2
  -3  16  -1 157999. 4232.90   5
   4 -16   1 36568.6 1979.02   2
   4  16   1 36774.6 1762.01   5
   5 -16   1 6411.44 860.099   2
   6 -16   1 4109.89 715.961   2
   7 -16   1 11334.9 1133.81   2
   8 -16   1 5090.11 823.337   2
   9 -16   1 37389.8 2185.02   2
  10 -16   1-169.192 543.007   2
  11 -16   1 18154.2 1574.77   2
  12 -16   1 10751.6 1272.23   2
  13 -16   1 20082.5 1720.25   2
  14 -16   1 224.205 524.414   2
  14 -17  -1-374.612 442.243   2
  13 -17  -1 2323.11 697.572   2
  12 -17  -1 16365.1 1537.36   2
  11 -17  -1 50499.7 2649.51   2
  10 -17  -1-385.909 533.060   2
   9 -17  -1 13483.7 1287.06   2
   8 -17  -1 2845.32 644.667   2
   7 -17  -1 8373.27 1014.03   2
   7  17  -1 9301.19 988.924   5
   6 -17  -1 63164.3 2721.95   2
   6  17  -1 57138.9 2479.51   5
   5 -17  -1-122.825 372.979   2
   5  17  -1 502.897 319.967   5
   4  17  -1 23942.6 1477.03   5
   4 -17  -1 22487.6 1537.96   2
   3 -17  -1 12687.6 1142.47   2
   3  17  -1 13135.0 1078.34   5
  -3  17   1 12562.1 955.977   5
  -2  17   1 42890.9 1835.83   5
   2  17  -1 43177.8 1973.62   5
   2 -17  -1 43494.5 2111.27   2
   1  17  -1 653.344 300.401   5
   1 -17  -1 2.24197 325.691   2
  -1 -17   1 397.980 346.904   2
  -1  17   1-262.998 315.505   5
   0  17   1 556.469 313.912   5
   0 -17  -1-51.8296 326.450   2
   0  17  -1 379.016 304.899   5
   0 -17   1-100.754 358.613   2
   1  17   1 50.3280 286.361   5
   1 -17   1 300.428 332.188   2
  -1  17  -1 498.791 337.543   5
  -1 -17  -1 806.730 376.643   2
  -2  17  -1 46300.4 2029.28   5
   2 -17   1 49710.2 2349.10   2
   2  17   1 46531.3 2006.56   5
   3  17   1 819.989 380.790   5
  -3  17  -1 500.086 449.805   5
   3 -17   1 1654.75 565.584   2
   4  17   1 13540.1 1099.81   5
   4 -17   1 14850.3 1299.65   2
   5 -17   1 4172.42 767.516   2
   5  17   1 5240.55 686.467   5
   6 -17   1 8183.45 1015.04   2
   7 -17   1-162.337 408.328   2
   8 -17   1 17317.7 1469.30   2
   9 -17   1 2198.01 648.252   2
  10 -17   1-99.3990 431.270   2
  11 -17   1 8859.94 1180.44   2
  12 -17   1 37909.3 2402.60   2
  13 -17   1 922.824 590.688   2
  13 -18  -1 2352.54 709.498   2
  12 -18  -1 245.420 461.842   2
  11 -18  -1 133.564 417.028   2
  10 -18  -1 15203.8 1426.10   2
   9 -18  -1-433.685 571.297   2
   8 -18  -1 429.871 375.869   2
   8  18  -1 543.270 393.995   5
   7 -18  -1 1542.69 554.139   2
   7  18  -1 2277.98 611.223   5
   6  18  -1 13234.0 1168.95   5
   6 -18  -1 12400.9 1229.98   2
   5  18  -1 356.521 335.139   5
   5 -18  -1 1002.61 476.483   2
   4 -18  -1 338.311 347.100   2
   4  18  -1 915.098 384.857   5
   3  18  -1 2799.97 534.130   5
   3 -18  -1 2329.08 562.894   2
  -2  18   1 4526.11 598.640   5
   2  18  -1 4330.85 674.350   5
   2 -18  -1 3580.03 671.346   2
  -1  18   1 12711.5 1007.43   5
   1  18  -1 13068.8 1083.16   5
  -1 -18   1 12912.9 1211.15   2
   1 -18  -1 11483.8 1087.24   2
   0 -18  -1 9641.59 1022.98   2
   0  18   1 11826.8 969.276   5
   0  18  -1 10757.0 975.148   5
   0 -18   1 11870.2 1145.74   2
   1 -18   1 50010.6 2392.17   2
  -1  18  -1 45084.8 2059.46   5
  -1 -18  -1 44529.1 2204.21   2
   2  18   1 1392.21 449.987   5
   2 -18   1 2111.01 588.185   2
  -2  18  -1 1713.91 459.571   5
   3 -18   1 139.761 431.393   2
   3  18   1-87.9535 372.762   5
   4  18   1 2989.82 569.234   5
   4 -18   1 1903.93 594.213   2
   5 -18   1 28.2543 400.315   2
   5  18   1 699.668 430.840   5
   6  18   1 38006.2 2001.74   5
   6 -18   1 36173.2 2163.37   2
   7 -18   1 357.308 473.022   2
   8 -18   1-260.629 513.421   2
   9 -18   1-864.962 622.967   2
  10 -18   1 15140.2 1490.77   2
  11 -18   1 2993.09 782.960   2
  12 -18   1 1000.75 554.486   2
  12 -19  -1 23420.2 1899.36   2
  11 -19  -1 1400.46 536.478   2
  10  19  -1 485.004 448.973   5
  10 -19  -1 633.278 527.905   2
   9  19  -1 25148.6 1758.26   5
   9 -19  -1 23416.4 1810.36   2
   8 -19  -1 83.0149 421.037   2
   8  19  -1 493.816 407.999   5
   7  19  -1 7247.92 922.433   5
   7 -19  -1 8656.95 1084.59   2
   6 -19  -1 9827.70 1110.24   2
   6  19  -1 10811.7 1090.59   5
   5 -19  -1 1874.09 469.988   2
   5  19  -1 1329.91 470.463   5
   4 -19  -1 2879.73 565.600   2
   4  19  -1 2616.24 560.346   5
   3  19  -1 4958.71 733.360   5
   3 -19  -1 5172.67 780.078   2
   2  19  -1 938.133 373.587   5
   2 -19  -1 1381.38 508.993   2
  -2 -19   1 1790.81 571.525   2
  -1 -19   1 497.335 366.332   2
   1  19  -1 1342.26 486.826   5
   1 -19  -1 890.827 437.388   2
   0 -19  -1 8891.83 1017.11   2
   0  19  -1 10374.3 994.957   5
   0 -19   1 10997.6 1152.86   2
   0  19   1 10580.3 953.233   5
  -1 -19  -1 3860.63 698.497   2
   1 -19   1 4204.73 777.916   2
  -1  19  -1 2901.66 571.596   5
   1  19   1 3653.43 596.921   5
   2 -19   1 772.603 479.897   2
  -2  19  -1 548.435 294.579   5
   2  19   1 327.775 329.382   5
  -2 -19  -1-214.149 415.012   2
   3 -19   1-7.92061 396.759   2
   3  19   1-69.0353 298.755   5
   4 -19   1 26284.2 1855.10   2
   4  19   1 31683.8 1762.19   5
   5 -19   1 7152.56 989.969   2
   5  19   1 7153.52 906.384   5
   6  19   1 13735.5 1205.47   5
   6 -19   1 11209.9 1224.93   2
   7  19   1 17051.6 1377.44   5
   7 -19   1 16403.2 1534.71   2
   8 -19   1 3054.65 746.842   2
   9 -19   1 36508.5 2328.15   2
  10 -19   1 55.5198 408.505   2
  11 -19   1 747.002 548.998   2
  11 -20  -1 1903.19 615.036   2
  11  20  -1 2773.15 645.983   5
  10 -20  -1-357.754 491.433   2
  10  20  -1-1103.38 605.602   5
   9 -20  -1 30059.2 2095.27   2
   9  20  -1 33131.9 2083.00   5
   8 -20  -1 905.308 526.213   2
   8  20  -1 556.639 447.267   5
   7 -20  -1 245.626 511.334   2
   7  20  -1-231.837 457.475   5
   6  20  -1 523.348 430.960   5
   6 -20  -1 750.263 515.217   2
   5  20  -1 5128.33 754.391   5
   5 -20  -1 5748.64 906.600   2
   4 -20  -1 6891.64 946.225   2
   4  20  -1 6430.13 840.399   5
   3 -20  -1 679.164 455.597   2
   3  20  -1 318.781 434.347   5
   2  20  -1-666.207 479.733   5
   2 -20  -1 187.073 372.388   2
  -2 -20   1-333.392 499.901   2
   1 -20  -1 1341.04 559.699   2
  -1 -20   1 1207.43 626.027   2
   1  20  -1 109.540 354.614   5
   0 -20  -1 34281.5 2048.92   2
   0  20  -1 35865.0 1932.91   5
   0 -20   1 36028.1 2153.13   2
   1 -20   1 830.456 507.001   2
  -1 -20  -1 972.191 500.406   2
  -1  20  -1 532.587 357.654   5
  -2 -20  -1 755.906 378.169   2
   2 -20   1 480.571 378.754   2
   2  20   1 161.308 379.963   5
   3  20   1 287.207 359.934   5
  -3 -20  -1-593.124 507.623   2
   3 -20   1-64.6956 461.662   2
   4 -20   1 17729.8 1550.89   2
   4  20   1 17418.6 1349.39   5
   5 -20   1 13407.4 1357.28   2
   5  20   1 13675.6 1203.28   5
   6  20   1 162.218 375.977   5
   6 -20   1 53.7464 420.197   2
   7 -20   1 11603.5 1333.35   2
   7  20   1 10869.6 1172.01   5
   8  20   1 2819.24 690.554   5
   8 -20   1 3425.23 842.859   2
   9 -20   1 9790.32 1271.83   2
  10 -20   1 947.139 533.224   2
   9 -21  -1 20088.2 1768.70   2
   9  21  -1 23716.2 1805.84   5
   8 -21  -1 43306.1 2588.93   2
   8  21  -1 46431.1 2491.77   5
   7 -21  -1 8.58908 498.788   2
   7  21  -1-379.939 482.882   5
   6 -21  -1 46282.1 2609.26   2
   6  21  -1 52915.7 2597.33   5
   5 -21  -1 14147.4 1429.24   2
   5  21  -1 12860.5 1249.20   5
   4 -21  -1 2616.08 667.232   2
   4  21  -1 1998.50 562.284   5
  -3 -21   1 51911.8 2678.55   2
   3 -21  -1 44888.2 2505.60   2
   3  21  -1 47740.6 2380.12   5
  -2 -21   1 2386.46 656.969   2
   2  21  -1 2127.12 552.595   5
   2 -21  -1 3801.64 760.387   2
   1  21  -1 65741.9 2797.14   5
   1 -21  -1 64127.0 2974.17   2
  -1 -21   1 61097.0 2981.08   2
   0 -21   1 5714.16 963.844   2
   0 -21  -1 4771.48 846.146   2
   1 -21   1 35807.9 2236.70   2
  -1 -21  -1 36107.9 2171.52   2
  -2 -21  -1 3715.88 759.151   2
   2 -21   1 3824.04 799.456   2
   3 -21   1 21300.6 1752.79   2
  -3 -21  -1 19228.9 1540.26   2
   4  21   1 972.161 451.776   5
   4 -21   1 2017.31 706.883   2
   5  21   1 11725.2 1164.72   5
   5 -21   1 12820.1 1367.68   2
   6  21   1 10947.5 1154.65   5
   6 -21   1 13588.5 1410.87   2
   7 -21   1 884.519 546.196   2
   7  21   1 819.087 465.780   5
   8  21   1 30548.9 2005.53   5
   8 -21   1 33204.9 2294.54   2
   9  21   1 19312.0 1605.65   5
   8  22  -1 5729.19 966.135   5
   8 -22  -1 7797.52 1176.79   2
   7 -22  -1 849.261 558.646   2
   7  22  -1 246.147 508.987   5
   6 -22  -1 6433.22 1087.57   2
   6  22  -1 5365.94 865.825   5
   5 -22  -1 10112.2 1249.59   2
   5  22  -1 9023.02 1073.62   5
  -4 -22   1 9286.40 1153.49   2
   4 -22  -1 10291.4 1231.50   2
   4  22  -1 8353.13 1052.88   5
   3  22  -1 1074.02 511.859   5
  -3 -22   1 407.511 471.047   2
   3 -22  -1 349.398 442.789   2
   2 -22  -1 645.994 448.453   2
  -2 -22   1-196.761 447.277   2
   1 -22  -1 678.189 544.859   2
  -1 -22   1 2041.46 704.546   2
   0 -22  -1 40802.9 2381.25   2
   0 -22   1 38191.2 2374.84   2
   1 -22   1 202.529 465.550   2
  -1 -22  -1 390.924 481.883   2
  -2 -22  -1 1719.42 568.581   2
   2 -22   1 732.258 446.211   2
  -3 -22  -1-189.163 580.802   2
   3 -22   1-108.545 478.296   2
   4 -22   1 7459.18 1085.31   2
  -4 -22  -1 7361.60 1011.84   2
   5 -22   1 7862.43 1131.36   2
   6 -22   1 5526.10 993.672   2
   7  22   1 8397.20 1058.78   5
   8  22   1 1282.49 555.877   5
   6 -23  -1 11355.8 1367.89   2
   6  23  -1 10321.4 1187.29   5
  -5 -23   1 3701.05 839.355   2
   5 -23  -1 4734.65 934.534   2
  -4 -23   1 2544.91 703.583   2
   4 -23  -1 778.652 434.608   2
  -3 -23   1 5442.56 973.349   2
   3 -23  -1 5238.83 967.893   2
   2 -23  -1 2068.72 664.340   2
  -2 -23   1 1863.77 660.844   2
   1 -23  -1-46.9734 458.428   2
  -1 -23   1-2345.15 712.765   2
   0 -23   1 1682.20 586.255   2
   0 -23  -1 1934.55 621.771   2
  -1 -23  -1 2495.29 630.473   2
   1 -23   1 2999.20 786.458   2
  -2 -23  -1 6973.56 1054.63   2
   2 -23   1 9012.07 1212.58   2
   3 -23   1-198.803 512.432   2
   4 -23   1 8193.12 1168.88   2
   3 -24  -1 3489.09 841.907   2
  -3 -24   1 5596.27 984.962   2
  -2 -24   1 824.751 499.136   2
   2 -24  -1 1443.32 604.735   2
   1 -24  -1 191.222 477.933   2
  -1 -24   1 130.019 496.158   2
  22   0  -2 36256.7 2189.71   1
  21   0  -2 11970.6 1214.84   1
 -21   0   2 9356.57 1153.73   4
 -20   0   2 26540.2 1846.62   4
  20   0  -2 26039.3 1738.55   1
  19   0  -2-412.684 473.872   1
 -19   0   2-2.76259 416.105   4
 -18   0   2 9484.14 1040.88   4
 -17   0   2 79505.0 3045.15   4
 -16   0   2 6711.89 834.151   4
 -15   0   2 116200. 3632.80   4
 -14   0   2 57135.5 2272.46   4
 -13   0   2 52887.0 2092.99   4
  12   0  -2 53466.9 2010.49   2
 -12   0   2 53274.0 2012.58   4
  11   0  -2 238.798 213.547   2
 -11   0   2 774.240 285.347   4
 -10   0   2 24465.1 1188.82   4
  10   0  -2 25524.6 1208.46   2
  -9   0   2 439451. 8471.99   4
   9   0  -2 410525. 8399.76   2
   8   0  -2 85012.3 2306.08   2
  -8   0   2 84008.5 2296.51   4
  -7   0   2 32286.5 1184.38   4
   7   0  -2 33400.8 1184.41   2
   6   0  -2 32301.4 1100.65   2
  -6   0   2 33775.2 1115.90   4
  -5   0   2 357557. 6826.54   4
   5   0  -2 367741. 6844.74   2
   4   0  -2 120699. 2561.05   2
  -4   0   2 122145. 2563.71   4
  -4   0   2 125824. 2586.05   2
  -3   0   2 15170.7 517.694   2
  -3   0   2 14710.3 502.422   4
  -2   0   2 143978. 2691.38   4
   0   0   2 442276. 7907.31   3
   1   0   2 141883. 2646.89   2
   1   0   2 142843. 2786.94   3
  -1   0  -2 145154. 2799.06   3
  -1   0  -2 136813. 2640.96   2
  -2   0  -2 174557. 3395.66   3
   2   0   2 175177. 3393.37   3
  -2   0  -2 171493. 3270.66   2
   2   0   2 162819. 3254.50   2
   3   0   2 108555. 2388.19   3
  -3   0  -2 104362. 2374.75   3
   3   0   2 107954. 2295.74   2
  -3   0  -2 110970. 2307.75   2
  -4   0  -2 67244.9 1683.39   2
   4   0   2 69675.8 1760.51   3
   4   0   2 65968.5 1666.02   2
   5   0   2 171946. 3610.68   2
   5   0   2 168684. 3684.73   3
   6   0   2 238038. 4915.66   2
   6   0   2 241196. 5005.18   3
  -6   0  -2 235737. 4898.91   4
  -7   0  -2 164780. 3738.32   4
   7   0   2 166445. 3831.23   3
   7   0   2 163204. 3729.93   2
   8   0   2 172987. 3999.67   3
  -8   0  -2 165898. 3878.83   4
   8   0   2 163104. 3891.47   2
   9   0   2 10965.0 759.299   2
  -9   0  -2 11789.9 774.731   4
   9   0   2 10765.6 781.365   3
 -10   0  -2 34001.6 1458.32   4
  10   0   2 33508.3 1491.42   3
  10   0   2 31999.5 1420.24   2
  11   0   2 3060.94 454.624   2
 -11   0  -2 2873.72 462.699   4
 -12   0  -2 34808.2 1624.41   4
  12   0   2 35065.8 1630.91   2
  13   0   2 146.401 252.265   2
 -13   0  -2 303.360 268.605   4
  14   0   2 12031.5 993.944   2
 -14   0  -2 12244.6 1023.84   4
 -15   0  -2 166.620 383.955   4
  15   0   2 916.913 411.823   2
 -16   0  -2 56597.9 2482.82   4
 -17   0  -2 2970.99 626.503   4
 -18   0  -2 24006.6 1682.65   4
 -19   0  -2 865.389 417.698   4
 -20   0  -2 5315.12 908.843   4
  23   1  -2 4652.64 852.467   1
  22  -1  -2 4715.98 803.347   1
  22   1  -2 5065.64 866.626   1
  21   1  -2 5558.39 893.346   1
 -21   1   2 8318.42 1081.87   4
  21  -1  -2 7812.26 984.314   1
  20  -1  -2 927.579 406.273   1
 -20   1   2-359.961 564.861   4
  19  -1  -2 1784.39 453.295   1
 -19   1   2 2023.62 558.626   4
 -19  -1   2 2740.81 643.385   4
 -18  -1   2 13899.9 1247.81   4
 -18   1   2 12714.3 1201.68   4
  18  -1  -2 15005.0 1213.04   1
 -17   1   2 38931.5 2087.55   4
  17  -1  -2 44419.6 2083.86   1
 -17  -1   2 43537.5 2153.64   4
 -16   1   2 4031.77 692.313   4
  16  -1  -2 5289.75 717.055   1
 -16  -1   2 4347.24 660.720   4
 -15   1   2 12780.2 1086.26   4
 -15  -1   2 12917.3 1071.38   4
  15  -1  -2 13330.1 1084.84   2
 -14   1   2 96739.9 3152.64   4
  14  -1  -2 101874. 3205.06   2
 -14  -1   2 96932.4 3135.20   4
  13  -1  -2 3612.41 540.933   2
 -13  -1   2 4116.78 570.136   4
 -13   1   2 3153.61 503.815   4
 -12  -1   2 21518.4 1199.42   4
 -12   1   2 20919.9 1186.72   4
  12  -1  -2 20469.6 1183.53   2
 -11   1   2 12232.0 870.932   4
  11  -1  -2 12496.8 878.810   2
 -10   1   2 45451.1 1705.95   4
 -10  -1   2 49739.2 1758.79   4
  10  -1  -2 48178.9 1735.60   2
   9  -1  -2 36855.7 1420.38   2
  -9  -1   2 33894.2 1358.30   4
  -9   1   2 33255.5 1350.05   4
  -8   1   2 145192. 3493.92   4
  -8  -1   2 152489. 3490.28   4
   8  -1  -2 149167. 3487.59   2
  -7  -1   2 3717.34 381.252   4
   7  -1  -2 4169.52 396.511   2
   6  -1  -2 69770.9 1814.16   2
  -6  -1   2 66333.5 1789.74   4
   5  -1  -2 102696. 2312.21   2
  -5  -1   2 99858.5 2291.26   4
   4   1  -2 3777.19 280.084   4
   4  -1  -2 4047.14 285.008   2
  -4  -1   2 3763.43 282.760   4
  -4   1   2 3705.21 285.822   2
   4  -1  -2 3377.76 295.867   1
   3   1  -2 24594.2 715.786   4
  -3   1   2 24117.1 717.953   2
   3  -1  -2 25408.8 710.431   2
   3  -1  -2 22630.8 734.009   1
   2  -1  -2 15103.1 448.205   2
  -2   1   2 15642.0 462.795   2
   2  -1  -2 16081.5 529.481   1
  -1  -1   2 536016. 9573.27   6
  -1   1   2 535829. 9564.37   3
  -1   1   2 555351. 9585.81   6
   1   1  -2 539936. 9605.94   5
   0   1   2 17127.9 520.738   3
   0  -1   2 16662.5 526.169   3
  -1   1  -2 31702.8 850.924   3
  -1  -1  -2 32399.1 871.746   3
  -1  -1  -2 33129.9 694.652   2
   1  -1   2 30913.2 844.752   3
   1   1   2 31567.0 703.251   4
   1   1   2 31787.8 862.768   3
  -1   1  -2 32487.0 828.584   2
  -1  -1  -2 30908.9 697.267   4
   1   1   2 31967.5 684.949   2
   1  -1   2 29228.1 804.619   2
   2   1   2 880.125 113.886   2
   2   1   2 624.753 131.953   3
  -2   1  -2 1017.64 150.423   3
   2  -1   2 578.559 127.037   3
  -2  -1  -2 688.395 104.740   4
   2  -1   2 625.868 126.205   2
  -2   1  -2 903.851 143.868   2
  -2  -1  -2 1084.55 121.417   2
  -2  -1  -2 972.418 152.303   3
  -3   1  -2 128188. 2691.11   2
  -3   1  -2 130036. 2698.78   3
   3   1   2 125181. 2561.90   2
   3  -1   2 121915. 2666.45   2
  -3  -1  -2 123922. 2571.08   4
  -3  -1  -2 133293. 2595.35   2
   3   1   2 123291. 2721.88   3
   3  -1   2 123109. 2676.58   3
   4  -1   2 85468.6 2069.98   3
   4  -1   2 85657.1 2071.77   2
  -4  -1  -2 89796.0 2012.32   2
   4   1   2 88305.5 1996.08   2
  -4  -1  -2 80921.0 1959.90   4
   4   1   2 89339.4 2145.93   3
   5   1   2 391.886 144.738   2
   5   1   2 152.341 133.189   3
   5  -1   2-34.1798 115.907   3
  -5  -1  -2 508.326 164.066   4
   5  -1   2 169.091 129.394   2
  -6  -1  -2 64.9575 140.089   4
   6   1   2 164.924 127.367   2
   6  -1   2 56.4307 159.269   2
   6   1   2-25.3980 171.373   3
   7   1   2 2105.79 295.973   2
   7   1   2 2156.20 345.633   3
   7  -1   2 2564.78 346.277   3
  -7  -1  -2 2162.04 314.059   4
   7  -1   2 2430.20 343.973   2
   8  -1   2 151023. 3675.09   2
   8   1   2 158755. 3768.10   3
  -8  -1  -2 154586. 3601.22   4
   8  -1   2 150560. 3651.88   3
   8   1   2 146176. 3567.42   2
   9   1   2 1893.06 342.870   2
  -9  -1  -2 2054.29 365.187   4
   9  -1   2 2549.60 395.465   2
  -9   1  -2 1902.74 365.345   4
   9   1   2 2016.12 381.235   3
   9  -1   2 2243.32 374.710   3
  10  -1   2 21.4100 227.030   3
  10  -1   2 226.297 198.860   2
 -10  -1  -2 391.109 247.226   4
  10   1   2 945.382 286.171   2
 -10   1  -2 83.4524 222.749   4
  11   1   2 22445.7 1203.87   2
 -11   1  -2 23963.9 1260.23   4
  11  -1   2 19516.0 1192.06   2
 -11  -1  -2 21639.8 1186.58   4
  12   1   2 8445.70 767.734   2
  12  -1   2 8304.66 792.345   2
 -12   1  -2 7816.81 766.541   4
 -12  -1  -2 8542.55 791.127   4
  13  -1   2 14952.1 1095.03   2
  13   1   2 14828.1 1071.83   2
 -13   1  -2 16284.0 1131.17   4
 -13  -1  -2 15117.1 1085.05   4
 -14  -1  -2 69.0870 333.735   4
  14  -1   2-334.371 365.450   2
 -14   1  -2-377.196 364.731   4
  15  -1   2 28050.3 1632.94   2
 -15  -1  -2 23591.2 1484.67   4
 -15   1  -2 23439.9 1504.98   4
  16  -1   2 6070.83 815.650   2
 -16  -1  -2 4695.29 756.545   4
  16  -1   2 4861.48 650.774   1
 -16   1  -2 4790.13 760.287   4
  17  -1   2 9308.55 888.587   1
 -17  -1  -2 8621.94 1003.91   4
 -17   1  -2 9031.38 1035.76   4
  17  -1   2 8981.87 1006.61   2
 -18   1  -2 177.562 399.677   4
 -18  -1  -2 430.877 416.875   4
 -19   1  -2 1598.73 571.564   4
 -20   1  -2 2157.34 634.400   4
  23   2  -2 12489.2 1352.99   1
  22   2  -2 601.263 475.526   1
  21  -2  -2 218.941 327.100   1
 -21   2   2-502.410 491.537   4
  20  -2  -2 19720.5 1485.75   1
 -20   2   2 18181.0 1554.11   4
  19  -2  -2 639.549 386.350   1
 -19   2   2 2263.22 640.806   4
 -18   2   2 46635.1 2357.68   4
  18  -2  -2 50926.0 2307.20   1
  17  -2  -2 12862.1 1072.49   1
 -17   2   2 9655.89 1028.94   4
  17  -2  -2 9923.03 1026.01   2
 -17  -2   2 9951.98 1029.96   4
 -16  -2   2 6335.08 819.099   4
  16  -2  -2 5998.56 743.572   1
 -16   2   2 5531.67 757.591   4
  16  -2  -2 6284.62 816.386   2
  15  -2  -2 87125.5 2935.81   1
  15  -2  -2 86668.8 3063.52   2
 -15  -2   2 89154.8 3092.47   4
 -15   2   2 93796.8 3158.70   4
 -14  -2   2 482.177 324.868   4
 -14   2   2 535.048 323.508   4
  14  -2  -2 1281.59 365.764   1
  14  -2  -2 812.636 322.858   2
 -13   2   2 10228.6 906.255   4
 -13  -2   2 13100.6 982.754   4
  13  -2  -2 10027.5 871.007   2
  13  -2  -2 10791.7 857.553   1
  12  -2  -2 147565. 3945.54   2
 -12  -2   2 152020. 3956.85   4
  12  -2  -2 158554. 3935.48   1
 -11  -2   2 3211.90 492.603   4
  11  -2  -2 2937.47 420.130   1
  11  -2  -2 1643.46 355.261   2
 -11   2   2 2191.58 413.977   4
  10  -2  -2 27702.5 1294.04   2
  10  -2  -2 30773.4 1280.29   1
 -10  -2   2 28554.7 1286.82   4
   9  -2  -2 2306.56 364.244   2
  -9  -2   2 2745.20 374.137   4
   9  -2  -2 2591.61 377.457   1
  -8  -2   2 9190.76 629.158   4
   8  -2  -2 9413.75 610.310   1
   8  -2  -2 9996.74 667.373   2
   7  -2  -2 27499.2 1063.03   1
   7  -2  -2 28285.8 1105.17   2
  -7  -2   2 27091.5 1063.08   4
   6  -2  -2 448.650 153.369   1
  -6  -2   2 394.562 160.308   4
   6  -2  -2 310.661 149.641   2
   5  -2  -2 76251.2 1931.24   2
   5  -2  -2 82807.0 1965.96   1
   4  -2  -2 32597.7 1023.76   1
   4   2  -2 34481.9 1009.49   4
   4  -2  -2 35073.7 1013.89   2
  -4   2   2 35300.4 1031.91   2
  -3   2   2 14556.2 540.842   2
  -3   2   2 14513.3 581.709   1
   3  -2  -2 13856.4 569.222   1
   3  -2  -2 14824.9 536.574   2
  -2   2   2 447708. 7816.00   2
   2  -2  -2 427425. 7794.01   2
  -1  -2   2 508.038 106.724   5
  -1  -2   2 353.949 84.7063   6
  -1   2   2 799.147 92.8190   3
   1   2  -2 557.212 127.452   5
  -1   2   2 597.308 71.2942   2
   1  -2  -2 618.652 91.4887   3
   1  -2  -2 585.005 72.1758   2
  -1   2   2 444.900 83.7549   6
   0  -2  -2 93429.9 1919.02   6
   0   2   2 97950.1 1932.36   3
   0   2  -2 95028.8 2034.29   5
   0  -2   2 97015.6 1960.74   3
   0  -2   2 93417.0 2024.28   5
   0  -2  -2 93246.2 1931.05   3
   0   2  -2 93195.1 1917.06   6
   1  -2   2 105996. 2206.61   3
  -1  -2  -2 108554. 2254.44   3
  -1   2  -2 107655. 2206.21   3
   1   2   2 112034. 2258.37   3
   1  -2   2 105711. 2268.08   2
  -2   2  -2 8519.62 437.163   2
   2  -2   2 8816.36 438.277   2
   2   2   2 8655.76 435.876   3
  -2  -2  -2 9370.01 457.417   3
   2   2   2 8531.04 356.616   4
  -2   2  -2 8736.99 407.340   3
   2  -2   2 8234.09 395.424   3
  -2  -2  -2 8303.83 326.241   2
  -3   2  -2 348536. 6405.34   2
  -3  -2  -2 342853. 6175.20   2
   3   2   2 338636. 6209.24   4
  -3   2  -2 344887. 6302.18   3
   3  -2   2 330858. 6381.30   2
   3  -2   2 333482. 6006.69   1
   3  -2   2 331718. 6289.37   3
   4   2   2 70240.7 1865.84   3
   4  -2   2 75871.2 1576.29   1
  -4  -2  -2 73138.9 1716.35   2
   4  -2   2 66274.1 1836.59   2
   4   2   2 70429.2 1699.28   2
  -4  -2  -2 70813.9 1719.96   4
   4  -2   2 69635.1 1769.29   3
   5   2   2 448.168 139.145   2
  -5  -2  -2 487.423 155.121   4
   5  -2   2 900.054 211.076   2
   5  -2   2 651.123 164.459   3
   5   2   2 567.217 177.549   3
   6  -2   2 119827. 2874.49   3
   6  -2   2 121212. 2959.57   2
   6   2   2 128270. 2842.56   2
  -6  -2  -2 124480. 2847.65   4
   7  -2   2 2547.21 325.658   3
   7  -2   2 2877.46 368.173   2
  -7  -2  -2 3121.35 363.250   4
   7   2   2 3053.04 359.444   2
   7   2   2 2648.79 373.456   3
   8  -2   2 27150.6 1223.80   2
   8   2   2 28209.6 1276.39   3
   8  -2   2 28030.6 1207.47   3
   8   2   2 26305.7 1123.11   2
  -8  -2  -2 26961.0 1147.75   4
   9  -2   2 37648.0 1554.85   2
   9  -2   2 38535.1 1509.16   3
   9   2   2 40431.3 1620.33   3
   9   2   2 37844.9 1473.29   2
  -9  -2  -2 39200.4 1493.44   4
 -10  -2  -2 24792.5 1215.42   4
  10  -2   2 23937.3 1221.92   3
  10  -2   2 24216.3 1258.01   2
 -11  -2  -2 86974.2 2663.98   4
  11  -2   2 81245.9 2713.32   2
 -11   2  -2 83862.5 2690.84   4
  11  -2   2 90012.3 2724.14   3
 -12   2  -2 8427.20 814.120   4
  12  -2   2 10097.2 889.855   2
 -12  -2  -2 9829.19 852.473   4
 -13   2  -2 12480.4 1015.00   4
  13  -2   2 13222.0 1036.30   2
  13  -2   2 13981.6 901.978   1
 -13  -2  -2 12682.7 999.783   4
  14  -2   2 24223.4 1514.54   2
  14  -2   2 28277.4 1380.16   1
 -14   2  -2 26428.4 1546.34   4
 -14  -2  -2 25981.2 1515.83   4
  15  -2   2 33490.3 1582.67   1
 -15  -2  -2 32321.9 1754.59   4
 -15   2  -2 28894.5 1704.51   4
  15  -2   2 31044.6 1744.59   2
 -16   2  -2 1323.95 504.338   4
  16  -2   2 1852.33 441.489   1
 -16  -2  -2 391.275 366.876   4
  16  -2   2 322.267 319.848   2
 -17   2  -2-48.1034 335.284   4
  17  -2   2 161.743 385.055   2
  18  -2   2 27656.9 1857.85   2
 -18   2  -2 33908.5 2025.13   4
 -19   2  -2 351.819 429.986   4
 -20   2  -2 12837.9 1356.85   4
  21  -3  -2 1742.67 523.213   1
 -21   3   2 1317.14 502.857   4
 -20   3   2 1165.26 575.494   4
  20  -3  -2 1409.68 488.232   1
 -19   3   2 2479.05 651.975   4
  19  -3  -2 2005.14 603.345   2
  19  -3  -2 3009.13 634.211   1
 -18   3   2 8873.89 1018.91   4
  18  -3  -2 9375.24 970.585   1
  18  -3  -2 9595.77 1059.75   2
  17  -3  -2 1400.59 471.365   2
  17  -3  -2 1553.97 474.275   1
 -17   3   2 1352.32 484.479   4
  16  -3  -2 658.315 333.143   1
 -16   3   2 7.36428 420.683   4
  16  -3  -2 1023.99 439.976   2
  15  -3  -2-1.56246 324.052   2
 -15   3   2-307.796 394.884   4
  15  -3  -2 388.495 247.038   1
  14  -3  -2 21487.0 1358.67   2
 -14   3   2 22772.9 1388.11   4
  14  -3  -2 22831.1 1299.90   1
  13  -3  -2 7175.45 674.893   1
 -13   3   2 7187.03 764.655   4
  13  -3  -2 6756.86 723.823   2
  12  -3  -2 1747.94 340.690   1
  12  -3  -2 1389.27 319.709   2
  11  -3  -2 12052.7 882.343   2
  11  -3  -2 12925.4 850.418   1
  10  -3  -2 365.913 234.901   2
  10  -3  -2 382.106 202.209   1
   9  -3  -2 117295. 3150.18   2
   9  -3  -2 125569. 3094.38   1
   8  -3  -2 75505.1 2185.19   2
   8  -3  -2 74727.1 2115.38   1
   7  -3  -2 45919.3 1475.57   1
   7  -3  -2 45716.0 1508.45   2
   6  -3  -2 91471.9 2284.70   1
   6  -3  -2 90249.7 2307.38   2
   5  -3  -2 2617.21 285.635   2
   5  -3  -2 2313.29 270.872   1
  -4   3   2 11912.7 562.561   2
   4  -3  -2 11909.3 556.432   2
   3  -3  -2 44467.2 1182.97   2
  -3   3   2 46333.4 1274.01   1
  -3   3   2 45641.8 1198.91   2
  -2   3   2 204100. 3838.26   2
   2  -3  -2 199489. 3816.11   2
  -2   3   2 199978. 3634.00   3
  -1   3   2 97187.1 1972.18   3
   1  -3  -2 96365.7 2005.66   2
   1  -3  -2 105279. 1991.37   3
  -1  -3   2 106442. 2228.87   5
  -1  -3   2 106293. 2024.03   6
  -1   3   2 102202. 2018.39   6
   1   3  -2 101291. 2204.73   5
   0  -3  -2 539.615 100.389   3
   0   3   2 795.853 108.781   3
   0  -3   2 357.100 109.191   5
   0   3  -2 536.567 103.084   6
   0   3  -2 515.862 158.791   5
   0  -3  -2 354.288 90.6424   6
  -1   3  -2 20172.9 660.847   3
   1  -3   2 20108.8 739.820   2
   1  -3   2 21012.9 651.401   3
   1   3   2 21508.5 686.189   3
  -1  -3  -2 20909.4 688.643   3
   1  -3   2 21091.7 760.209   5
   2   3   2 1305.89 187.643   3
   2  -3   2 1538.79 171.574   3
  -2   3  -2 1521.20 205.652   2
  -2   3  -2 1986.87 138.170   1
   2  -3   2 1608.27 210.590   2
  -2   3  -2 1324.59 157.914   3
  -2  -3  -2 1503.81 187.651   3
   3  -3   2 3756.49 349.626   2
   3   3   2 3704.92 323.413   3
  -3   3  -2 3813.20 285.974   3
  -3  -3  -2 3371.12 239.314   2
   3  -3   2 4047.16 288.818   3
   3   3   2 4111.49 286.600   4
  -4  -3  -2 10554.0 495.565   2
   4  -3   2 11341.3 439.602   1
   4  -3   2 10680.5 527.554   3
   4   3   2 11089.8 607.736   3
   4  -3   2 10159.3 603.959   2
   5  -3   2 38059.0 1031.09   1
   5   3   2 38059.3 1317.41   3
   5  -3   2 37787.4 1187.28   3
   6   3   2 10320.0 682.819   3
   6  -3   2 11338.6 531.887   1
   6  -3   2 11173.2 623.612   3
   6  -3   2 10476.4 694.208   2
   7  -3   2 59288.4 1934.40   2
   7   3   2 58657.7 1930.78   3
   7  -3   2 64101.0 1639.85   1
   7  -3   2 59172.4 1803.02   3
   8  -3   2 6420.98 548.197   3
  -8  -3  -2 7424.78 587.555   4
   8  -3   2 5741.51 569.774   2
   8   3   2 7141.22 628.594   3
   9  -3   2 89039.3 2569.67   3
   9  -3   2 86400.3 2694.17   2
  -9  -3  -2 89840.7 2574.93   4
  10  -3   2 17375.3 865.259   1
  10  -3   2 15649.5 959.566   3
 -10  -3  -2 16071.4 983.417   4
  10  -3   2 15421.6 1027.53   2
  11  -3   2 1244.52 396.471   2
 -11  -3  -2 1830.40 419.566   4
  11  -3   2 616.480 251.153   1
  11  -3   2 266.556 223.312   3
  12  -3   2 38301.7 1496.93   1
 -12  -3  -2 36955.8 1677.19   4
  12  -3   2 36659.7 1773.83   2
  13  -3   2 6180.69 614.359   1
  13  -3   2 6404.32 775.110   2
 -13   3  -2 5290.72 703.469   4
  14  -3   2 41336.4 2037.52   2
 -14   3  -2 43896.8 2064.01   4
  15  -3   2 49658.8 2290.89   2
  15  -3   2 53204.0 2029.82   1
  16  -3   2 2509.51 591.576   2
 -16   3  -2 1368.29 493.435   4
  16  -3   2 2657.63 475.928   1
  17  -3   2 8354.53 993.691   2
 -17   3  -2 7165.84 956.032   4
  18  -3   2 606.625 406.772   2
 -18   3  -2 494.159 430.387   4
  19  -3   2-162.548 442.276   2
 -19   3  -2 364.567 437.985   4
 -20   3  -2 12003.9 1290.45   4
  20  -3   2 11490.2 1242.45   2
  21  -4  -2 4300.20 727.656   1
 -21   4   2 5464.85 946.898   4
  20  -4  -2 12560.5 1318.73   2
 -20   4   2 15053.3 1432.24   4
  20  -4  -2 15022.0 1296.94   1
  19  -4  -2 504.945 492.392   2
  19  -4  -2 1167.46 483.897   1
 -19   4   2 513.152 518.520   4
  18  -4  -2 50200.6 2292.20   1
 -18   4   2 50420.6 2475.73   4
  18  -4  -2 46938.1 2392.66   2
  17  -4  -2 1495.74 515.434   2
 -17   4   2 983.427 461.213   4
  17  -4  -2 832.028 417.289   1
 -16   4   2 5810.45 759.384   4
  16  -4  -2 6087.94 779.486   2
  16  -4  -2 7094.37 775.490   1
  15  -4  -2-13.1558 273.208   1
  15  -4  -2 462.099 295.562   2
 -15   4   2-329.645 519.394   4
  14  -4  -2 2178.38 490.755   2
  14  -4  -2 2469.05 455.333   1
  13  -4  -2 38329.8 1836.91   2
  13  -4  -2 45474.4 1819.62   1
  12  -4  -2 67079.5 2452.87   2
  12  -4  -2 80685.2 2477.21   1
  11  -4  -2 793.435 256.795   1
  11  -4  -2 703.865 298.428   2
  10  -4  -2 2102.97 392.928   2
  10  -4  -2 2490.17 367.328   1
   9  -4  -2 11491.2 741.306   1
   9  -4  -2 10202.7 766.069   2
   8  -4  -2 54160.5 1705.47   1
   8  -4  -2 49268.3 1728.17   2
   7  -4  -2 35232.3 1333.02   2
   7  -4  -2 37620.3 1317.12   1
  -7   4   2 36577.5 1060.82   3
  -6   4   2 167929. 3321.02   3
   6  -4  -2 168365. 3766.29   2
   6  -4  -2 171964. 3712.94   1
   5  -4  -2 3608.10 356.608   2
   4  -4  -2 27890.7 966.470   2
  -3   4   2 17409.4 683.081   2
   3  -4  -2 18060.9 475.446   5
   3  -4  -2 17969.3 686.541   2
  -2   4   2 128518. 2397.07   5
  -2   4   2 126251. 2367.38   3
  -2   4   2 130779. 2671.75   2
   2   4  -2 127017. 2761.12   5
   1   4  -2 913.828 180.765   5
   1  -4  -2 1422.18 156.689   2
  -1   4   2 1091.54 114.479   6
  -1  -4   2 961.387 163.609   5
  -1  -4   2 1109.76 115.116   6
   1  -4  -2 881.874 101.507   3
  -1   4   2 915.600 98.6556   3
   0  -4  -2 171911. 3114.80   6
   0  -4  -2 158377. 3150.70   3
   0   4  -2 152996. 3364.33   5
   0   4   2 162094. 3141.03   3
   0   4  -2 165270. 3103.20   6
   0  -4   2 160524. 3358.75   5
   1  -4   2 15291.6 676.078   2
   1  -4   2 15408.3 661.092   5
  -1  -4  -2 15662.3 589.683   3
   1  -4   2 15018.4 541.738   3
   1   4   2 14858.3 571.923   3
  -1   4  -2 15599.2 678.176   5
   2   4   2 1652.48 208.551   3
   2  -4   2 1866.32 185.362   3
  -2   4  -2 2095.46 203.018   3
   2  -4   2 1882.57 254.337   2
   3  -4   2 204807. 3957.53   3
  -3   4  -2 201243. 3828.00   1
   3  -4   2 201237. 4249.61   2
  -3   4  -2 205772. 3969.57   3
   3   4   2 190380. 4113.31   3
  -4   4  -2 98628.3 2080.40   1
  -4  -4  -2 97872.7 2193.19   2
   4   4   2 98508.5 2422.46   3
   4  -4   2 93564.8 2207.54   3
   4  -4   2 96475.9 2467.38   2
   5  -4   2 2757.84 280.581   3
   5   4   2 3227.23 369.434   3
   5  -4   2 3077.00 380.384   2
   6   4   2 27413.0 1169.60   3
   6  -4   2 27384.2 1018.55   3
   6  -4   2 26672.0 899.863   1
   6  -4   2 27165.7 1183.46   2
   7  -4   2 117317. 3185.29   2
   7   4   2 118574. 3155.37   3
   7  -4   2 124124. 2752.39   1
   7  -4   2 124060. 2943.47   3
   8  -4   2 15302.8 840.965   3
   8  -4   2 14988.6 945.192   2
   8  -4   2 15637.6 738.261   1
   9  -4   2 69556.9 2335.63   2
   9  -4   2 68605.1 1936.58   1
   9  -4   2 69849.5 2129.34   3
  10  -4   2 2508.10 460.190   2
  10  -4   2 1970.42 362.669   3
  10  -4   2 2761.08 364.844   1
  11  -4   2 103390. 3293.42   2
  11  -4   2 105829. 3095.59   3
  12  -4   2 10528.4 948.664   2
  12  -4   2 11320.8 779.494   1
  13  -4   2 53916.1 2317.04   2
  13  -4   2 58236.3 2006.50   1
 -14   4  -2 11153.2 1013.89   4
  14  -4   2 10675.3 817.912   1
  14  -4   2 11855.7 1058.33   2
 -15   4  -2 17493.6 1348.77   4
  15  -4   2 21395.3 1221.22   1
  15  -4   2 22120.8 1514.62   2
  16  -4   2 19053.4 1457.13   2
 -16   4  -2 18005.4 1405.95   4
  17  -4   2 3688.00 685.709   2
 -17   4  -2 2684.67 601.282   4
 -18   4  -2 22306.6 1668.45   4
  18  -4   2 21491.1 1658.81   2
 -19   4  -2 922.881 555.743   4
  19  -4   2 54.6863 399.531   2
 -20   4  -2 18579.2 1642.34   4
 -21   5   2 66223.9 3199.15   4
  21  -5  -2 65117.4 3154.30   2
  20  -5  -2 5505.26 897.794   2
 -20   5   2 5525.85 921.213   4
  20  -5  -2 5093.73 781.024   1
 -19   5   2 5357.86 874.536   4
  19  -5  -2 5277.73 823.671   2
  19  -5  -2 4962.22 728.925   1
  18  -5  -2 2817.45 670.576   2
  18  -5  -2 2288.59 582.721   1
 -18   5   2 688.613 518.194   4
  17  -5  -2 66236.0 2589.26   1
  17  -5  -2 58539.3 2662.25   2
 -17   5   2 62188.6 2737.74   4
  16  -5  -2 4914.36 658.802   1
 -16   5   2 4161.00 671.730   4
  16  -5  -2 3325.64 615.344   2
  15  -5  -2 3588.20 546.079   1
  15  -5  -2 3676.36 594.934   2
  14  -5  -2 1428.53 364.944   1
  14  -5  -2 924.041 401.769   2
  13  -5  -2 20986.4 1210.19   1
  13  -5  -2 19832.2 1296.63   2
  12  -5  -2 103101. 3005.04   1
  12  -5  -2 100454. 3155.95   2
  11  -5  -2 50064.4 1997.81   2
  11  -5  -2 49573.8 1839.04   1
  10  -5  -2 77328.6 2524.59   2
  10  -5  -2 79700.9 2400.31   1
   9  -5  -2 60402.2 1914.96   1
   9  -5  -2 54202.2 1955.66   2
   8  -5  -2 356.706 216.566   2
   8  -5  -2 365.935 157.182   1
   7  -5  -2 97121.9 2638.07   2
  -7   5   2 99353.7 2149.08   3
  -6   5   2 78602.2 1687.19   3
   6  -5  -2 76709.6 2158.46   2
  -5   5   2 212200. 3929.99   3
   5  -5  -2 221649. 4544.38   2
   4  -5  -2 200868. 3846.15   5
   4  -5  -2 212327. 4275.11   2
   3  -5  -2 73331.8 1790.47   2
   3  -5  -2 68001.0 1450.28   5
   2   5  -2 8000.08 484.140   5
  -2   5   2 7696.44 316.809   5
   2  -5  -2 8627.07 455.971   2
  -1   5   2 33040.9 808.602   6
  -1  -5   2 34791.6 816.469   6
   1  -5  -2 32173.2 805.004   3
  -1   5   2 34045.7 802.177   3
   1  -5  -2 31193.6 952.515   2
   1   5  -2 32848.5 1065.67   5
   0   5   2 57409.0 1285.80   3
   0   5  -2 56229.6 1517.81   5
   0   5  -2 54835.4 1202.95   6
   0  -5  -2 55602.8 1296.28   3
   1  -5   2 15078.8 564.734   3
  -1   5  -2 16826.8 734.276   5
   1   5   2 16386.5 617.611   3
  -1  -5  -2 16110.1 620.721   3
   2  -5   2 149547. 3017.99   3
   2   5   2 154470. 3200.57   3
   2  -5   2 148377. 3386.84   2
  -3   5  -2 157512. 3189.70   3
   3   5   2 160379. 3415.62   3
   3  -5   2 158095. 3563.06   2
   3  -5   2 153280. 3165.48   3
  -4   5  -2 237024. 4701.96   3
   4   5   2 221900. 4938.02   3
   4  -5   2 226568. 4682.42   3
   4  -5   2 239729. 5135.31   2
   5  -5   2 13312.7 625.925   3
  -5   5  -2 13574.4 585.390   1
   5  -5   2 13707.5 820.969   2
   5   5   2 12995.3 748.151   3
   6  -5   2 15694.5 905.506   2
   6   5   2 17324.4 915.916   3
   6  -5   2 16032.2 741.136   3
   7  -5   2 71745.7 1985.80   3
   7  -5   2 73911.2 2303.24   2
   8  -5   2 120102. 3330.17   2
   8  -5   2 121759. 2988.55   3
   9  -5   2 92790.5 2860.06   2
   9  -5   2 89303.3 2375.58   1
   9  -5   2 96168.2 2585.16   3
  10  -5   2 14845.9 1052.96   2
  10  -5   2 17028.7 869.050   1
  10  -5   2 15696.5 927.369   3
  11  -5   2 20060.8 1115.71   3
  11  -5   2 19711.0 997.104   1
  11  -5   2 20106.1 1294.27   2
  12  -5   2 216741. 5731.81   2
  12  -5   2 242453. 5240.26   1
  13  -5   2 17702.9 1020.68   1
  13  -5   2 14990.7 1193.42   2
  14  -5   2 18570.4 1087.80   1
  14  -5   2 16263.7 1258.24   2
  15  -5   2 1479.92 423.549   2
  15  -5   2 1723.06 361.872   1
  16  -5   2 7142.51 931.032   2
 -16   5  -2 5564.00 869.489   4
 -17   5  -2 120024. 4203.06   4
  17  -5   2 125224. 4290.28   2
 -18   5  -2 2465.33 735.667   4
  18  -5   2 1882.45 540.291   2
  19  -5   2 5089.01 856.751   2
 -19   5  -2 4614.21 811.394   4
 -20   5  -2 6248.15 1023.73   4
 -20   6   2 320.571 474.237   4
  20  -6  -2 891.042 409.306   1
  20  -6  -2 944.531 494.498   2
  19  -6  -2 1695.32 560.672   2
  19  -6  -2 1241.68 413.660   1
 -18   6   2 30797.3 1938.96   4
  18  -6  -2 31428.9 1781.80   1
  18  -6  -2 27654.0 1860.59   2
 -17   6   2 10468.1 1121.06   4
  17  -6  -2 10135.5 981.720   1
  17  -6  -2 10774.3 1115.04   2
  16  -6  -2 391.947 254.111   1
  16  -6  -2 142.262 333.110   2
  15  -6  -2 414.244 304.086   1
  15  -6  -2 220.886 301.552   2
  14  -6  -2 11757.3 1054.27   2
  14  -6  -2 11360.9 936.994   1
  13  -6  -2 79962.5 2624.28   1
  13  -6  -2 79705.6 2868.52   2
  12  -6  -2 1141.16 425.645   2
  12  -6  -2 818.697 337.067   1
  11  -6  -2 4355.66 535.059   1
  11  -6  -2 3130.99 498.102   2
  10  -6  -2 4518.39 566.867   2
   9  -6  -2 114104. 3209.54   2
  -8   6   2 48889.1 1291.69   3
   8  -6  -2 48990.9 1791.00   2
  -7   6   2 1661.90 171.705   3
   7  -6  -2 1499.78 314.840   2
  -6   6   2 2473.77 173.574   3
   6  -6  -2 2248.62 231.597   5
   6  -6  -2 2758.20 376.229   2
   5  -6  -2 146734. 3392.05   2
   5  -6  -2 144717. 2966.09   5
   4  -6  -2 108694. 2671.02   2
   4  -6  -2 112159. 2301.59   5
  -3   6   2 32588.3 882.011   5
   3  -6  -2 33214.1 1121.53   2
   2  -6  -2 2801.82 144.399   3
   2   6  -2 3309.58 338.386   5
  -2   6   2 3164.85 229.061   5
   2  -6  -2 2804.77 284.732   2
   1   6  -2 54294.4 1578.87   5
   1  -6  -2 54419.0 1488.46   2
  -1  -6   2 59112.5 1227.87   6
  -1   6   2 54452.6 1210.58   6
  -1   6   2 56895.8 1235.92   3
   1  -6  -2 57101.9 1253.40   3
   0  -6  -2 239303. 4425.23   6
   0   6  -2 241945. 4910.57   5
   0   6  -2 244006. 4431.26   6
   0   6   2 248924. 4569.64   3
   0  -6  -2 231901. 4570.83   3
  -1   6  -2 93297.8 2017.89   6
  -1   6  -2 94934.8 2403.17   5
   1  -6   2 100604. 2124.48   3
   1   6   2 101601. 2195.40   3
  -1  -6  -2 99814.4 2207.52   3
   2  -6   2 11703.8 490.807   3
   2   6   2 11942.7 586.721   3
   2  -6   2 12289.1 715.417   2
   3  -6   2 1124.98 158.545   3
   3  -6   2 1000.71 236.939   2
   3   6   2 1149.27 227.261   3
   4  -6   2 306030. 6489.21   2
   4  -6   2 310693. 5935.27   3
  -4   6  -2 317980. 5947.12   3
   5  -6   2 15635.2 930.035   2
   5  -6   2 16946.8 699.112   3
   6  -6   2 2726.77 298.084   3
   6  -6   2 2776.55 419.798   2
   7  -6   2 2087.03 284.092   3
   7  -6   2 2257.54 373.183   2
   8  -6   2 5932.99 620.618   2
   8  -6   2 6439.12 513.102   3
   9  -6   2 54569.8 2121.34   2
   9  -6   2 57426.6 1834.17   3
  10  -6   2 1472.85 404.875   2
  10  -6   2 1430.40 305.673   3
  11  -6   2 13858.9 904.580   3
  11  -6   2 13315.7 1056.00   2
  12  -6   2 376.655 312.980   2
  13  -6   2 5410.53 729.049   2
  14  -6   2 548.048 336.850   2
  15  -6   2 910.425 394.637   2
  16  -6   2 21512.6 1591.77   2
 -17   6  -2 417.411 486.391   4
  17  -6   2 727.012 492.915   2
  18  -6   2 228.672 398.839   2
 -18   6  -2 1445.20 613.776   4
  19  -6   2 33.1810 404.947   2
 -19   6  -2 190.515 411.633   4
 -20   7   2 10159.5 1257.03   4
  20  -7  -2 11183.3 1276.79   2
  19  -7  -2 3332.19 715.650   2
 -19   7   2 3854.56 803.763   4
 -18   7   2 15047.3 1384.49   4
  18  -7  -2 16834.8 1435.39   2
  17  -7  -2 511.934 430.410   2
  16  -7  -2 5655.45 825.917   2
  15  -7  -2 16901.3 1310.93   2
  14  -7  -2 54452.9 2383.97   2
  13  -7  -2 191.516 355.039   2
  12  -7  -2 229.165 289.479   2
  11  -7  -2 96711.6 3075.69   2
  10  -7  -2 13836.0 978.012   2
   9  -7  -2 62478.8 2214.08   2
  -8   7   2 43066.0 1111.65   3
   8  -7  -2 37497.5 1601.78   2
   7  -7  -2 31336.0 1368.26   2
  -7   7   2 31961.3 840.338   3
   6  -7  -2 214702. 4015.95   5
   6  -7  -2 218943. 4563.28   2
   5  -7  -2 3868.97 420.008   2
   5  -7  -2 3967.06 291.428   5
   4  -7  -2 55593.1 1366.21   5
   4  -7  -2 54456.3 1696.39   2
   3  -7  -2 177732. 4039.72   2
  -3   7   2 194814. 3732.07   5
  -2   7   2 41504.3 1084.22   5
   2  -7  -2 38859.1 1262.25   2
  -2   7   2 37899.0 918.290   6
  -2  -7   2 42195.1 938.435   6
   2  -7  -2 35082.0 830.052   3
   2   7  -2 39930.6 1332.28   5
   1  -7  -2 67810.2 1827.64   2
   1  -7  -2 69930.9 1513.53   3
   1   7  -2 69369.5 1924.61   5
   0   7  -2 69552.1 1953.00   5
   0  -7  -2 71728.1 1656.87   3
  -1   7  -2 27948.1 754.222   6
  -1   7  -2 27890.9 1080.31   5
   2  -7   2 79501.1 1791.53   3
  -2   7  -2 79031.4 2149.67   5
   2  -7   2 75182.3 2229.60   2
   3  -7   2 34449.6 1365.67   2
   3  -7   2 34749.8 992.573   3
  -4   7  -2 11550.6 526.979   3
   4  -7   2 10137.8 496.148   3
   4  -7   2 10953.8 760.808   2
   5  -7   2 5826.64 394.050   3
   5  -7   2 5089.46 552.733   2
   6  -7   2 51373.5 1474.62   3
   6  -7   2 51383.1 1910.32   2
   7  -7   2 2256.48 284.126   3
   7  -7   2 1983.97 401.343   2
   8  -7   2 17780.8 854.017   3
   8  -7   2 17304.8 1102.51   2
   9  -7   2 37895.2 1397.57   3
   9  -7   2 37134.9 1727.62   2
  10  -7   2 9181.28 869.930   2
  10  -7   2 9663.54 695.090   3
  11  -7   2 18594.2 1297.46   2
  11  -7   2 21898.5 1120.70   3
  12  -7   2 45297.3 2142.87   2
  13  -7   2 24194.8 1582.23   2
  14  -7   2 455.555 357.713   2
  15  -7   2 44105.0 2296.29   2
  16  -7   2 1490.81 451.730   2
  17  -7   2 3466.88 700.581   2
 -18   7  -2 11744.1 1272.51   4
  18  -7   2 12073.7 1297.36   2
  19  -7   2 3506.83 782.812   2
 -19   7  -2 2429.26 721.959   4
 -20   8   2 5861.77 1019.50   4
  20  -8  -2 4862.15 880.436   2
  19  -8  -2 18254.6 1578.85   2
 -19   8   2 19336.6 1611.90   4
  18  -8  -2 2810.73 700.344   2
  17  -8  -2 12071.5 1242.81   2
  16  -8  -2 1345.40 554.366   2
  15  -8  -2 518.988 426.017   2
  14  -8  -2 10706.8 1045.62   2
  13  -8  -2 14297.6 1173.30   2
  12  -8  -2 36251.9 1814.41   2
  11  -8  -2 18126.1 1222.89   2
  10  -8  -2 4641.82 627.275   2
   9  -8  -2 16205.8 1060.76   2
  -9   8   2 14794.7 588.250   3
  -8   8   2 4524.38 263.883   3
   8  -8  -2 6290.48 650.264   2
  -7   8   2 1012.21 101.261   3
   7  -8  -2 1722.43 343.793   2
   6  -8  -2 3208.86 432.082   2
   5  -8  -2 5918.54 544.836   2
   5  -8  -2 6046.96 389.681   5
   4  -8  -2 27165.1 1156.04   2
  -3   8   2 111929. 2446.76   5
   3  -8  -2 107328. 2756.87   2
   2  -8  -2 4550.36 211.538   3
  -2  -8   2 5527.35 254.070   6
  -2   8   2 5481.76 365.188   5
  -2   8   2 4528.77 232.239   6
   2  -8  -2 4571.35 420.807   2
   2   8  -2 4868.65 461.282   5
   1  -8  -2 37167.2 1292.50   2
   1   8  -2 36898.8 1335.97   5
  -1   8   2 38077.8 1142.79   5
   1  -8  -2 38476.8 984.408   3
   0   8  -2 9474.40 628.753   5
   0  -8  -2 10046.6 475.745   3
  -1   8  -2 4473.38 252.159   6
  -1  -8  -2 4726.68 257.296   6
  -1   8  -2 4714.19 460.480   5
   2  -8   2 53445.6 1337.32   3
  -2   8  -2 49380.6 1663.80   5
   2  -8   2 52860.8 1807.68   2
   3  -8   2 50887.8 1786.06   2
   3  -8   2 49548.7 1283.47   3
   4  -8   2 113667. 2484.90   3
   4  -8   2 120020. 3180.99   2
   5  -8   2 31589.6 1430.73   2
   5  -8   2 32701.5 1026.77   3
   6  -8   2 855.266 163.623   3
   6  -8   2 597.228 282.979   2
   7  -8   2 11810.0 920.739   2
   7  -8   2 12419.4 650.695   3
   8  -8   2 2461.52 307.384   3
   8  -8   2 2699.61 485.642   2
   9  -8   2 2979.08 516.895   2
   9  -8   2 4327.41 443.753   3
  10  -8   2 43600.7 1574.84   3
  10  -8   2 43078.0 1989.14   2
  11  -8   2 692.266 323.878   2
  12  -8   2-64.1659 358.509   2
  13  -8   2 1440.42 478.900   2
  14  -8   2 11631.4 1150.70   2
  15  -8   2 219.897 421.935   2
  16  -8   2 2292.51 533.330   2
  17  -8   2-303.778 498.197   2
 -18   8  -2 1256.86 573.190   4
  18  -8   2 1724.25 551.863   2
 -19   8  -2 13855.7 1445.89   4
  19  -9  -2 209.185 406.775   2
  18  -9  -2 29062.3 1987.99   2
  17  -9  -2 2372.42 603.498   2
  16  -9  -2 4007.18 706.861   2
  15  -9  -2 297.766 398.044   2
  14  -9  -2 49420.1 2354.47   2
  13  -9  -2-38.6624 348.544   2
  12  -9  -2 2472.42 544.508   2
  11  -9  -2 10013.5 922.313   2
  10  -9  -2 54900.2 2211.84   2
   9  -9  -2 42921.3 1864.07   2
   8  -9  -2 76516.4 2456.31   2
  -8   9   2 65912.0 1349.74   3
   7  -9  -2 2696.71 454.828   2
   6  -9  -2 76962.0 2406.46   2
   5  -9  -2 21050.0 1079.17   2
   4  -9  -2 27301.1 1223.92   2
   3   9  -2 224956. 4913.90   5
  -3   9   2 220937. 4500.77   5
   3  -9  -2 224300. 4926.01   2
   2  -9  -2 1001.94 104.281   3
  -2   9   2 1046.05 188.063   5
  -2   9   2 935.094 103.124   6
   2   9  -2 1031.22 256.512   5
  -2  -9   2 1237.91 115.192   6
   2  -9  -2 860.063 223.187   2
   1  -9  -2 81070.2 2262.05   2
  -1   9   2 82248.5 2056.23   5
   1  -9  -2 85082.4 1823.25   3
   1   9  -2 79804.5 2290.60   5
   0   9  -2 47020.3 1624.51   5
   0  -9  -2 49797.2 1323.41   3
  -1  -9  -2 91962.7 1905.34   6
  -1   9  -2 94665.8 2567.08   5
  -1   9  -2 96565.4 1918.91   6
  -2   9  -2 702.874 246.193   5
  -2   9  -2 416.716 94.2843   6
   2  -9   2 512.130 294.701   2
   2  -9   2 251.985 114.149   3
  -2  -9  -2 123.999 83.7042   6
   3  -9   2 23509.7 1207.06   2
   3  -9   2 24181.2 794.993   3
   4  -9   2 381.836 120.696   3
   4  -9   2 417.773 253.416   2
   5  -9   2 115170. 2533.12   3
   5  -9   2 116257. 3303.04   2
   6  -9   2 4326.57 345.831   3
   6  -9   2 4771.16 597.190   2
   7  -9   2 5010.14 403.798   3
   7  -9   2 4568.52 634.047   2
   8  -9   2 2645.80 506.390   2
   8  -9   2 2621.06 322.586   3
   9  -9   2 43466.2 1470.68   3
   9  -9   2 41873.6 1958.75   2
  10  -9   2 1077.23 406.058   2
  10  -9   2 1358.47 268.217   3
  11  -9   2 3271.94 592.455   2
  12  -9   2 592.085 318.948   2
  13  -9   2 785.120 402.522   2
  14  -9   2 38932.8 2181.98   2
  15  -9   2 20556.7 1622.45   2
  16  -9   2 283.993 414.800   2
  17  -9   2 1240.61 472.715   2
  18  -9   2 1429.59 632.576   2
  19 -10  -2 1281.29 518.317   2
  18 -10  -2 694.412 463.973   2
  17 -10  -2 28171.0 1927.10   2
  16 -10  -2 33073.8 2017.74   2
  15 -10  -2 22123.8 1607.80   2
  14 -10  -2 36441.7 2012.81   2
  13 -10  -2 7792.20 906.715   2
  12 -10  -2 9361.84 949.552   2
  11 -10  -2 3530.19 602.186   2
  10 -10  -2 14567.4 1109.94   2
   9 -10  -2 128172. 3721.13   2
   8 -10  -2 514.342 316.549   2
   7 -10  -2 10060.1 837.665   2
   6 -10  -2 37373.0 1609.89   2
   5 -10  -2 48441.0 1833.94   2
   4 -10  -2 31609.7 1386.80   2
  -4  10   2 33512.5 1139.77   5
  -3  10   2 9704.06 374.286   6
   3  10  -2 10455.5 736.993   5
  -3 -10   2 10037.8 378.906   6
  -3  10   2 10553.3 594.731   5
   3 -10  -2 9714.93 719.834   2
   2 -10  -2 739.885 92.7346   3
  -2  10   2 821.388 194.996   5
   2 -10  -2 1268.57 291.467   2
   2  10  -2 874.120 259.157   5
   1 -10  -2 15025.0 868.786   2
   1 -10  -2 15264.4 571.152   3
  -1  10   2 15586.4 746.845   5
   1  10  -2 14405.0 863.242   5
   0  10  -2 169212. 4033.54   5
   0 -10  -2 173702. 3555.39   3
  -1  10  -2 49932.4 1748.36   5
  -2 -10  -2 62670.0 1483.53   6
  -2  10  -2 68338.7 2116.94   5
  -2  10  -2 63498.0 1468.36   6
   2 -10   2 68407.3 2271.22   2
   2 -10   2 67838.2 1620.01   3
   3 -10   2 2520.21 240.387   3
   3 -10   2 2286.84 434.857   2
   4 -10   2 1000.79 342.965   2
   4 -10   2 1556.54 193.607   3
   5 -10   2 68540.0 2424.37   2
   5 -10   2 67661.8 1664.35   3
   6 -10   2 55851.9 1485.06   3
   6 -10   2 54628.4 2178.53   2
   7 -10   2 142061. 3082.02   3
   7 -10   2 132345. 3935.79   2
   8 -10   2 6281.89 778.912   2
   8 -10   2 7103.46 496.863   3
   9 -10   2 1929.01 287.942   3
   9 -10   2 2361.53 534.152   2
  10 -10   2 4039.82 640.222   2
  11 -10   2 11636.7 1090.70   2
  12 -10   2 16761.0 1363.50   2
  13 -10   2 15270.9 1340.87   2
  14 -10   2 915.503 489.816   2
  15 -10   2 2601.43 669.383   2
  16 -10   2 25044.7 1840.54   2
  17 -10   2 10350.9 1256.79   2
  18 -11  -2 2347.74 676.808   2
  17 -11  -2 26653.0 1909.62   2
  16 -11  -2 6927.66 974.273   2
  15 -11  -2 489.456 468.845   2
  14 -11  -2 410.110 441.943   2
  13 -11  -2 20493.0 1481.02   2
  12 -11  -2 7889.95 887.667   2
  11 -11  -2 2872.17 555.548   2
  10 -11  -2 2307.25 490.925   2
   9 -11  -2 7798.44 830.074   2
   8 -11  -2 5598.34 664.889   2
   7 -11  -2 14175.3 1018.15   2
   6 -11  -2 3612.33 506.800   2
   5 -11  -2 11870.5 874.167   2
   4  11  -2 1714.06 354.758   5
   4 -11  -2 2095.10 391.914   2
  -4  11   2 2118.86 295.769   5
  -3  11   2 4715.98 220.927   6
   3 -11  -2 5935.20 594.798   2
  -3  11   2 5571.15 460.412   5
   3  11  -2 5029.59 538.879   5
  -3 -11   2 6003.94 249.135   6
   2 -11  -2 22717.9 631.666   3
   2 -11  -2 24130.9 1175.52   2
  -2  11   2 24529.4 1000.77   5
   2  11  -2 23901.9 1180.32   5
  -1  11   2 48381.6 1543.11   5
   1 -11  -2 46584.2 1231.17   3
   1  11  -2 47122.0 1735.12   5
   0  11  -2 37076.1 1519.75   5
   0  11   2 37752.3 1348.63   5
   1 -11   2 37705.0 1658.54   2
  -1  11  -2 36686.2 1510.44   5
  -2 -11  -2 16512.5 546.198   6
   2 -11   2 18038.1 686.839   3
  -2  11  -2 16788.4 980.090   5
   2 -11   2 15901.6 1078.04   2
  -2  11  -2 16994.6 541.274   6
   3 -11   2 41166.2 1784.80   2
  -3 -11  -2 43490.0 1180.37   6
  -3  11  -2 41922.7 1142.60   6
   3 -11   2 43392.0 1177.80   3
   4 -11   2 122360. 2570.96   3
   4 -11   2 117101. 3501.07   2
   5 -11   2 51603.8 1343.65   3
   5 -11   2 50258.4 2089.31   2
   6 -11   2 17491.4 1222.10   2
   6 -11   2 18888.4 718.416   3
   7 -11   2 6002.86 766.551   2
   7 -11   2 5553.96 400.350   3
   8 -11   2 54851.3 1554.74   3
   8 -11   2 54461.4 2330.04   2
   9 -11   2 46154.5 2183.35   2
  10 -11   2 10494.1 1057.53   2
  11 -11   2 921.071 410.446   2
  12 -11   2 53476.9 2547.47   2
  13 -11   2 38353.9 2164.24   2
  14 -11   2 446.821 428.603   2
  15 -11   2 2642.56 739.161   2
  16 -11   2 18884.5 1656.23   2
  17 -11   2 14648.3 1465.83   2
  18 -12  -2 22474.7 1832.57   2
  17 -12  -2 5599.68 926.002   2
  16 -12  -2 5495.16 900.762   2
  15 -12  -2 35059.6 2112.39   2
  14 -12  -2 81.2342 492.437   2
  13 -12  -2 38397.7 2111.72   2
  12 -12  -2 81.7257 436.347   2
  11 -12  -2 525.470 354.039   2
  10 -12  -2 8158.82 913.024   2
   9 -12  -2 1494.11 460.253   2
   8 -12  -2 11117.2 982.647   2
   7 -12  -2 6614.55 723.827   2
   6 -12  -2-405.188 334.960   2
   5 -12  -2 2780.42 459.020   2
   4  12  -2 19631.7 1134.74   5
  -4  12   2 17550.2 553.835   6
   4 -12  -2 18258.4 1112.86   2
  -4 -12   2 18514.8 571.376   6
  -4  12   2 20022.4 928.151   5
  -3  12   2-16.1541 169.856   5
   3  12  -2 34.9061 232.635   5
   3 -12  -2 125.637 215.076   2
   2  12  -2 17597.6 1031.35   5
   2 -12  -2 14174.7 475.187   3
  -2  12   2 16771.4 842.202   5
   2 -12  -2 16504.8 1019.88   2
   1 -12  -2 15213.8 606.483   3
   1  12  -2 16572.3 1000.29   5
  -1  12   2 14943.3 824.763   5
   1 -12  -2 16405.6 995.141   2
   0  12   2 20769.2 996.934   5
   0  12  -2 18735.1 1077.16   5
  -1  12  -2 117172. 3283.61   5
   1 -12   2 123720. 3532.13   2
  -2  12  -2 17.5349 263.345   5
   2 -12   2 545.628 361.068   2
   2 -12   2 182.858 114.154   3
  -3 -12  -2 67283.3 1585.52   6
  -3  12  -2 66269.9 2258.59   5
   3 -12   2 69009.1 1638.29   3
   3 -12   2 64504.2 2423.71   2
   4 -12   2 22981.6 1382.69   2
   4 -12   2 22905.6 756.872   3
   5 -12   2 5844.70 720.934   2
   5 -12   2 5302.46 338.064   3
   6 -12   2 100696. 3321.11   2
   7 -12   2 1395.20 444.568   2
   8 -12   2 9176.65 970.948   2
   9 -12   2 39014.4 2044.88   2
  10 -12   2 15630.5 1318.54   2
  11 -12   2 28182.2 1802.10   2
  12 -12   2 2560.42 647.811   2
  13 -12   2 357.945 430.550   2
  14 -12   2 4900.56 852.066   2
  15 -12   2 25736.2 1914.44   2
  16 -12   2 260.467 499.982   2
  17 -13  -2 981.925 510.897   2
  16 -13  -2 477.108 447.229   2
  15 -13  -2 24128.8 1797.80   2
  14 -13  -2-630.842 539.998   2
  13 -13  -2 9476.49 1063.68   2
  12 -13  -2 29611.7 1848.50   2
  11 -13  -2 32913.5 1906.04   2
  10 -13  -2 33562.4 1856.60   2
   9 -13  -2 1102.92 423.907   2
   8 -13  -2 14237.1 1139.65   2
   7 -13  -2 154580. 4353.71   2
   6 -13  -2 29522.6 1572.74   2
   5 -13  -2 26266.8 1433.28   2
   5  13  -2 28362.3 1446.69   5
   4 -13  -2 9936.39 870.545   2
   4  13  -2 10082.8 837.967   5
  -4  13   2 10788.1 709.314   5
  -3  13   2 22736.8 1057.92   5
   3  13  -2 22295.2 1234.56   5
   3 -13  -2 20909.9 1253.75   2
   2 -13  -2 206023. 4969.76   2
   2  13  -2 197254. 4897.89   5
  -2  13   2 205504. 4566.49   5
  -1  13   2 1485.40 295.252   5
   1 -13  -2 2015.52 399.972   2
   1  13  -2 1801.22 375.239   5
   0  13  -2 1537.46 367.753   5
   0  13   2 1108.98 277.710   5
  -1  13  -2 22143.3 1223.72   5
   1  13   2 22206.3 1112.72   5
   1 -13   2 23437.5 1380.72   2
   2 -13   2 62201.0 2380.69   2
  -2  13  -2 59087.2 2155.24   5
   2 -13   2 61054.4 1565.53   3
   3 -13   2 22936.3 1406.60   2
  -3  13  -2 22258.1 1242.89   5
   3 -13   2 23027.1 778.129   3
   4 -13   2 2494.56 501.044   2
   5 -13   2 3471.31 595.144   2
   6 -13   2 2655.38 595.554   2
   7 -13   2 8148.71 933.665   2
   8 -13   2 31281.8 1822.32   2
   9 -13   2 17590.3 1398.28   2
  10 -13   2 6916.24 890.728   2
  11 -13   2 94.3815 400.598   2
  12 -13   2 1134.11 451.054   2
  13 -13   2 2609.16 695.451   2
  14 -13   2 17290.1 1543.67   2
  15 -13   2 11767.8 1287.71   2
  16 -13   2 7164.30 1090.39   2
  17 -14  -2 5574.55 945.735   2
  16 -14  -2 2852.98 643.951   2
  15 -14  -2-75.1686 491.198   2
  14 -14  -2 5839.49 925.042   2
  13 -14  -2 1642.32 533.740   2
  12 -14  -2 42624.3 2298.31   2
  11 -14  -2 6932.19 918.002   2
  10 -14  -2 7428.53 919.462   2
   9 -14  -2 2353.31 551.150   2
   8 -14  -2 5738.16 764.448   2
   7 -14  -2 13839.7 1148.32   2
   6  14  -2 37101.3 1765.78   5
   6 -14  -2 33105.3 1736.48   2
   5  14  -2 778.686 369.082   5
   5 -14  -2 741.753 407.373   2
   4 -14  -2 1993.86 470.874   2
  -4  14   2 1754.47 334.314   5
   4  14  -2 1907.13 443.695   5
  -3  14   2 41812.7 1570.91   5
   3 -14  -2 40274.9 1819.81   2
   3  14  -2 43829.3 1849.27   5
  -2  14   2 60492.2 1985.02   5
   2  14  -2 60786.0 2257.28   5
   2 -14  -2 63078.1 2334.43   2
  -1  14   2 16751.2 951.685   5
   1  14  -2 17710.5 1117.23   5
   1 -14  -2 16842.4 1116.08   2
   0  14   2 1174.26 290.676   5
   0  14  -2 776.180 316.036   5
   0 -14  -2 802.487 293.413   2
   1 -14   2 10340.5 561.968   3
   1 -14   2 9811.74 924.182   2
  -1  14  -2 9232.69 811.465   5
   1  14   2 10247.4 789.130   5
   2 -14   2 3535.00 596.954   2
  -2  14  -2 3469.59 537.585   5
   3 -14   2 76195.3 2810.97   2
  -3  14  -2 74452.8 2545.42   5
   4 -14   2 242.980 348.213   2
   5 -14   2 33701.8 1834.13   2
   6 -14   2 2393.29 524.402   2
   7 -14   2 28929.6 1762.79   2
   8 -14   2 2988.94 593.653   2
   9 -14   2 11414.4 1150.37   2
  10 -14   2 10451.9 1125.69   2
  11 -14   2 4050.66 772.272   2
  12 -14   2 6741.26 982.534   2
  13 -14   2 13649.6 1364.89   2
  14 -14   2 2670.09 636.336   2
  15 -14   2 527.414 393.840   2
  16 -15  -2-350.036 500.717   2
  15 -15  -2 49.3286 560.628   2
  14 -15  -2 3903.71 747.813   2
  13 -15  -2 3226.41 711.575   2
  12 -15  -2 8053.48 1033.29   2
  11 -15  -2 13084.9 1260.55   2
  10 -15  -2 65941.8 2837.60   2
   9 -15  -2-1741.73 522.332   2
   8 -15  -2-188.413 348.733   2
   7 -15  -2 43689.6 2121.59   2
   6  15  -2-442.453 445.688   5
   6 -15  -2-76.0675 403.235   2
   5  15  -2 83573.0 2888.66   5
   5 -15  -2 82672.2 2969.39   2
  -4  15   2 84299.8 2476.79   5
   4  15  -2 80695.4 2798.44   5
   4 -15  -2 79801.0 2870.52   2
   3 -15  -2 272.662 303.063   2
   3  15  -2 493.082 352.694   5
  -3  15   2 692.550 271.777   5
   2  15  -2 15869.1 1114.93   5
   2 -15  -2 15608.0 1135.64   2
  -2  15   2 15322.3 943.192   5
   1 -15  -2 9402.50 871.281   2
   1  15  -2 9769.60 867.180   5
  -1  15   2 8978.77 721.094   5
   0  15  -2 558.130 357.736   5
   0  15   2 152.922 258.060   5
   0 -15   2-391.102 422.484   2
   0 -15  -2 80.7887 264.716   2
  -1  15  -2 53616.3 2165.05   5
   1  15   2 56695.7 2049.70   5
   1 -15   2 56191.6 2395.92   2
   2  15   2 534.713 328.216   5
  -2  15  -2 1075.62 390.763   5
   2 -15   2 1472.75 421.983   2
   3 -15   2 4330.90 738.643   2
   4 -15   2 880.680 414.152   2
   5 -15   2 25903.0 1647.94   2
   6 -15   2 1180.33 374.582   2
   7 -15   2 4855.87 775.370   2
   8 -15   2 3077.96 651.970   2
   9 -15   2-446.159 520.586   2
  10 -15   2 26965.6 1860.50   2
  11 -15   2 27107.1 1893.67   2
  12 -15   2 25635.6 1890.64   2
  13 -15   2 9225.17 1180.64   2
  14 -15   2 1854.18 590.760   2
  15 -16  -2-156.488 400.967   2
  14 -16  -2 1599.86 568.598   2
  13 -16  -2 28400.9 1979.58   2
  12 -16  -2 7938.98 1044.11   2
  11 -16  -2 3002.49 703.417   2
  10 -16  -2 563.531 382.780   2
   9 -16  -2 54152.1 2549.69   2
   8 -16  -2 14275.4 1252.72   2
   7 -16  -2-529.745 420.576   2
   7  16  -2-91.9760 360.777   5
   6 -16  -2 1764.19 474.341   2
   6  16  -2 827.553 401.584   5
   5  16  -2 37145.1 1862.38   5
   5 -16  -2 36534.5 1911.57   2
   4  16  -2 74391.3 2732.59   5
  -4  16   2 74608.2 2368.79   5
   4 -16  -2 71871.3 2802.07   2
  -3  16   2 4288.22 525.033   5
   3 -16  -2 4448.87 659.027   2
   3  16  -2 4736.57 652.726   5
   2 -16  -2-321.111 393.204   2
   2  16  -2 7.09726 324.699   5
  -2  16   2-103.252 267.326   5
  -1  16   2 33427.8 1521.82   5
   1  16  -2 34508.0 1725.33   5
   0  16  -2 77917.3 2744.43   5
   0  16   2 80482.3 2559.07   5
   0 -16   2 72525.0 2877.21   2
   0 -16  -2 75545.3 2760.91   2
   1 -16   2 12005.6 1103.99   2
  -1 -16  -2 11715.6 996.480   2
  -1  16  -2 11983.5 994.606   5
   1  16   2 12326.6 920.756   5
   2  16   2 16876.4 1114.31   5
   2 -16   2 15102.9 1240.31   2
  -2  16  -2 16308.5 1172.77   5
   3  16   2 3142.14 550.176   5
   3 -16   2 3353.80 690.769   2
   4 -16   2 25155.4 1641.31   2
   5 -16   2 4780.36 754.842   2
   6 -16   2 619.355 357.622   2
   7 -16   2-398.044 506.974   2
   8 -16   2 4302.60 775.668   2
   9 -16   2 16035.6 1434.53   2
  10 -16   2 168.438 410.632   2
  11 -16   2 1343.89 546.454   2
  12 -16   2 307.572 473.822   2
  13 -16   2 272.407 419.537   2
  15 -17  -2 2904.08 758.420   2
  14 -17  -2 331.678 441.289   2
  13 -17  -2 7936.33 1104.61   2
  12 -17  -2-150.235 426.140   2
  11 -17  -2 28851.5 1947.32   2
  10 -17  -2-101.326 479.594   2
   9 -17  -2 4258.12 728.406   2
   8  17  -2 18658.8 1405.20   5
   8 -17  -2 16914.5 1407.14   2
   7 -17  -2 1189.96 479.017   2
   7  17  -2 520.636 376.920   5
   6  17  -2 43491.5 2105.02   5
   6 -17  -2 37375.3 2045.05   2
   5 -17  -2 10384.0 1072.70   2
   5  17  -2 9059.62 951.039   5
   4 -17  -2 19032.3 1384.61   2
   4  17  -2 18479.8 1326.08   5
   3 -17  -2 22575.5 1485.61   2
   3  17  -2 20661.1 1379.97   5
  -2  17   2-188.193 275.551   5
   2 -17  -2-238.316 350.711   2
   2  17  -2-3.57978 287.835   5
   1 -17  -2 29589.2 1698.16   2
  -1  17   2 29469.6 1460.08   5
   1  17  -2 32492.1 1720.19   5
   0  17   2 886.884 342.965   5
   0 -17   2 233.143 366.644   2
   0  17  -2 1183.65 426.932   5
   0 -17  -2 699.732 393.917   2
  -1  17  -2 5356.64 747.659   5
   1 -17   2 4941.04 756.888   2
  -1 -17  -2 4315.29 667.092   2
   1  17   2 4661.01 613.044   5
   2  17   2 8628.96 821.998   5
   2 -17   2 9509.81 1020.09   2
  -2  17  -2 9261.88 930.832   5
   3  17   2 14252.9 1060.60   5
   3 -17   2 12885.8 1202.01   2
   4 -17   2 13557.2 1273.88   2
   4  17   2 15905.0 1165.85   5
   5 -17   2 19170.2 1529.93   2
   6 -17   2 5995.68 886.833   2
   7 -17   2 8087.27 1033.28   2
   8 -17   2 35118.4 2170.61   2
   9 -17   2 2423.75 595.570   2
  10 -17   2 14166.4 1431.91   2
  11 -17   2 39444.0 2414.06   2
  12 -17   2-7.12502 437.833   2
  14 -18  -2 6396.94 1055.28   2
  13 -18  -2 6142.85 1024.57   2
  12 -18  -2 6335.29 1000.70   2
  11 -18  -2 5641.45 935.268   2
  10 -18  -2 1166.80 550.602   2
  10  18  -2 2154.00 584.721   5
   9  18  -2 1109.48 435.277   5
   9 -18  -2 1615.77 533.396   2
   8 -18  -2 1313.57 554.557   2
   8  18  -2 787.807 429.328   5
   7 -18  -2 2849.78 660.972   2
   7  18  -2 3490.08 663.883   5
   6  18  -2 4420.67 743.944   5
   6 -18  -2 5106.96 793.274   2
   5  18  -2 1625.03 463.471   5
   5 -18  -2 1905.11 550.672   2
   4  18  -2 12752.8 1124.54   5
   4 -18  -2 10521.8 1075.39   2
   3  18  -2 28555.5 1679.97   5
   3 -18  -2 30176.3 1801.11   2
   2 -18  -2-17.8342 310.940   2
   2  18  -2-36.3034 345.235   5
   1  18  -2 15352.3 1195.92   5
  -1 -18   2 14599.4 1280.33   2
  -1  18   2 14254.2 1025.85   5
   1 -18  -2 14195.1 1197.31   2
   0  18   2 1609.20 430.777   5
   0  18  -2 1138.69 372.791   5
   0 -18  -2 1675.06 492.518   2
   0 -18   2 1116.02 463.248   2
  -1  18  -2 4390.79 659.274   5
   1  18   2 4511.65 601.828   5
  -1 -18  -2 5638.02 772.041   2
   1 -18   2 4479.93 748.826   2
   2 -18   2 47073.5 2384.93   2
  -2  18  -2 45876.8 2143.73   5
   2  18   2 43984.9 1992.52   5
  -2 -18  -2 46537.5 2208.05   2
   3 -18   2 140.889 393.530   2
   3  18   2 613.317 331.879   5
   4  18   2 40827.7 1990.72   5
   4 -18   2 44286.0 2372.59   2
   5  18   2 20122.6 1402.35   5
   5 -18   2 21210.8 1655.96   2
   6 -18   2 28952.1 1960.36   2
   7 -18   2 22811.7 1757.84   2
   8 -18   2 159.383 441.219   2
   9 -18   2 1273.36 585.405   2
  10 -18   2 65086.6 3180.47   2
  11 -18   2 4930.41 944.767   2
  13 -19  -2 2891.90 749.297   2
  12 -19  -2-424.256 480.622   2
  11 -19  -2 11765.9 1315.22   2
  11  19  -2 13000.6 1323.78   5
  10 -19  -2 533.179 426.268   2
  10  19  -2 60.0079 488.947   5
   9  19  -2 155.768 444.137   5
   9 -19  -2-419.470 423.118   2
   8  19  -2 20977.1 1592.67   5
   8 -19  -2 21598.2 1685.82   2
   7 -19  -2 22310.1 1667.60   2
   7  19  -2 21147.0 1573.19   5
   6  19  -2-105.358 411.597   5
   6 -19  -2 190.468 372.501   2
   5 -19  -2-315.410 397.609   2
   5  19  -2-38.2625 376.328   5
   4 -19  -2 6349.57 877.657   2
   4  19  -2 4115.65 666.678   5
   3  19  -2 543.549 382.507   5
   3 -19  -2 1468.95 474.581   2
   2 -19  -2 24225.2 1660.46   2
  -2 -19   2 25494.9 1747.27   2
   2  19  -2 26441.6 1651.05   5
  -1 -19   2 1033.15 469.835   2
   1  19  -2 1224.48 443.521   5
   1 -19  -2 1112.21 469.121   2
   0 -19   2 8868.67 1082.38   2
   0  19  -2 8873.66 957.552   5
   0 -19  -2 8749.93 974.981   2
   1  19   2 3623.92 583.936   5
   1 -19   2 3996.14 748.316   2
  -1  19  -2 2699.35 580.572   5
  -1 -19  -2 2715.91 592.576   2
   2  19   2 10299.4 971.437   5
  -2  19  -2 12107.9 1108.09   5
  -2 -19  -2 10755.7 1076.95   2
   2 -19   2 10063.8 1150.58   2
   3  19   2 203.647 285.714   5
   3 -19   2 395.864 436.773   2
   4  19   2 931.256 408.414   5
   4 -19   2 668.787 446.884   2
   5  19   2 11333.0 1076.42   5
   5 -19   2 9276.57 1113.98   2
   6  19   2 843.748 462.836   5
   6 -19   2 557.934 462.235   2
   7 -19   2 13223.7 1408.48   2
   8 -19   2 4328.88 878.935   2
   9 -19   2 24012.9 1906.43   2
  10 -19   2 407.715 512.361   2
  11 -20  -2 3614.43 817.737   2
  11  20  -2 4621.09 861.893   5
  10 -20  -2 8111.57 1112.35   2
  10  20  -2 8244.42 1087.93   5
   9 -20  -2 1625.06 674.807   2
   9  20  -2 1100.18 576.940   5
   8  20  -2 15295.4 1385.02   5
   8 -20  -2 12644.2 1327.93   2
   7 -20  -2 4413.27 815.672   2
   7  20  -2 4708.59 806.038   5
   6 -20  -2 12004.0 1265.68   2
   6  20  -2 11035.1 1135.85   5
   5 -20  -2-16.1716 409.200   2
   5  20  -2-637.978 484.846   5
   4 -20  -2 786.791 378.569   2
   4  20  -2 802.029 383.827   5
   3 -20  -2 2612.28 598.524   2
   3  20  -2 2485.88 591.117   5
   2 -20  -2 125.933 440.821   2
   2  20  -2 26.7002 365.437   5
  -2 -20   2 361.426 383.894   2
   1 -20  -2 47555.5 2437.46   2
  -1 -20   2 45719.0 2493.96   2
   1  20  -2 47193.4 2315.79   5
   0 -20   2 8017.96 1045.86   2
   0  20  -2 6607.17 871.789   5
   0 -20  -2 6498.40 900.561   2
  -1 -20  -2 29584.6 1850.79   2
   1 -20   2 32704.4 2095.59   2
  -1  20  -2 30614.7 1815.56   5
   2 -20   2 21974.5 1727.53   2
  -2  20  -2 20575.3 1477.21   5
  -2 -20  -2 21714.7 1563.69   2
  -3 -20  -2 3718.19 662.389   2
   3 -20   2 4799.40 878.845   2
   4  20   2 4578.96 703.682   5
   4 -20   2 4951.81 833.586   2
   5  20   2 8837.23 988.335   5
   5 -20   2 10011.2 1206.87   2
   6 -20   2 4758.26 895.193   2
   6  20   2 4093.39 726.751   5
   7  20   2 49255.3 2448.51   5
   7 -20   2 45202.2 2656.05   2
   8 -20   2 1868.45 685.098   2
   9 -20   2 114.222 456.977   2
  10 -21  -2-314.315 497.847   2
   9  21  -2 473.434 479.265   5
   9 -21  -2 429.135 523.011   2
   8 -21  -2 70.6800 506.055   2
   8  21  -2 534.076 483.688   5
   7 -21  -2 1719.39 586.001   2
   7  21  -2 767.381 417.297   5
   6  21  -2-731.988 526.340   5
   6 -21  -2-503.600 541.916   2
   5  21  -2 5200.48 831.584   5
   5 -21  -2 2495.34 673.437   2
   4 -21  -2 395.822 478.545   2
   4  21  -2 492.724 437.806   5
   3 -21  -2 202.598 469.201   2
  -3 -21   2 847.610 459.476   2
   3  21  -2 334.990 369.970   5
   2  21  -2 347.825 357.363   5
   2 -21  -2 369.269 421.621   2
  -2 -21   2-428.728 530.629   2
   1 -21  -2 3274.57 733.274   2
   1  21  -2 4951.68 811.552   5
  -1 -21   2 5225.32 933.501   2
   0 -21   2 3313.14 776.413   2
   0 -21  -2 2437.98 635.093   2
   0  21  -2 1029.06 485.170   5
  -1 -21  -2 1283.02 514.545   2
   1 -21   2 931.478 584.504   2
   2 -21   2 509.554 452.070   2
  -2 -21  -2 44.3795 386.871   2
   3 -21   2 1730.03 666.729   2
  -3 -21  -2 2159.06 594.165   2
   4 -21   2 3376.54 772.482   2
   5 -21   2 112.729 423.424   2
   6  21   2 1372.09 499.324   5
   6 -21   2 818.890 524.115   2
   7  21   2 864.034 475.115   5
   7 -21   2 1873.54 709.649   2
   8  21   2 1800.81 508.464   5
   9  21   2 208.673 490.482   5
   9 -22  -2 7912.45 1175.58   2
   8 -22  -2 32693.7 2278.01   2
   8  22  -2 37161.6 2278.40   5
   7 -22  -2 6073.63 1003.08   2
   7  22  -2 5001.81 875.450   5
   6  22  -2 848.516 428.448   5
   6 -22  -2 1724.83 579.524   2
   5 -22  -2 3636.08 775.223   2
   5  22  -2 5325.36 874.044   5
  -4 -22   2 28282.6 2056.01   2
   4  22  -2 32008.8 2015.98   5
   4 -22  -2 29418.6 2039.53   2
   3  22  -2 9569.54 1114.50   5
   3 -22  -2 11337.9 1233.35   2
  -3 -22   2 10808.7 1275.02   2
   2 -22  -2 1331.29 526.352   2
   2  22  -2 2320.56 656.056   5
   1 -22  -2 17302.0 1546.95   2
  -1 -22   2 18449.1 1653.76   2
   0 -22   2 536.636 493.097   2
   0 -22  -2 894.441 432.825   2
  -1 -22  -2 28248.6 1906.98   2
   1 -22   2 29838.0 2117.14   2
   2 -22   2 814.813 485.978   2
   3 -22   2-52.1972 493.738   2
   4 -22   2 9605.36 1235.92   2
   5 -22   2-111.355 449.714   2
   7 -23  -2 49151.9 2816.45   2
   6 -23  -2 3106.63 771.850   2
   6  23  -2 3358.28 753.961   5
   5 -23  -2 1020.76 526.447   2
   5  23  -2 515.232 462.659   5
  -5 -23   2 736.701 483.105   2
  -4 -23   2 10.0588 510.096   2
   4  23  -2-121.868 554.271   5
   4 -23  -2 982.446 501.783   2
   3 -23  -2 3664.21 794.949   2
  -3 -23   2 2864.24 779.102   2
  -2 -23   2 39626.0 2504.17   2
   2 -23  -2 38034.9 2344.38   2
  -1 -23   2 49.2685 471.571   2
   0 -23   2 1139.83 581.332   2
   1 -23   2 289.262 458.658   2
   2 -23   2 21971.2 1879.28   2
  23   0  -3-636.793 576.402   1
  22   0  -3-30.2056 412.861   1
  21   0  -3-191.621 400.371   1
 -21   0   3-271.345 481.468   4
 -20   0   3-607.425 572.353   4
  20   0  -3-347.040 415.582   1
  19   0  -3 55.4180 365.508   1
 -19   0   3 105.543 415.878   4
 -18   0   3-256.205 490.247   4
  18   0  -3 10.0958 313.749   1
 -17   0   3 501.641 431.213   4
 -16   0   3 652.595 456.448   4
 -15   0   3 400.801 447.664   4
 -14   0   3 452.533 352.780   4
 -13   0   3-41.8836 306.363   4
 -12   0   3 314.300 259.750   4
 -11   0   3-110.411 277.804   4
 -10   0   3 181.784 222.221   4
   9   0  -3 79.5714 221.957   2
  -9   0   3 26.2101 201.420   4
  -8   0   3 25.8416 199.589   4
   8   0  -3 192.122 193.832   2
  -7   0   3 64.4872 173.862   4
  -6   0   3 144.434 134.717   4
  -5   0   3 180.517 98.7746   4
  -4   0   3 259.308 103.116   2
  -4   0   3 190.093 98.6239   4
   3   0  -3 285.042 85.3035   4
  -3   0   3 214.457 91.4274   4
   2   0  -3 304.502 71.2460   4
   2   0  -3 291.505 98.6778   5
  -2   0   3 173.883 72.7681   5
   2   0  -3 196.944 85.9937   1
  -1   0   3 185.828 94.9186   3
  -1   0   3 145.078 87.0196   5
  -1   0   3 145.463 83.7189   6
   1   0  -3 210.512 85.1414   6
  -1   0   3 270.511 69.4236   1
   0   0  -3 134.380 95.8908   3
   0   0   3 152.478 104.855   3
   0   0  -3 219.262 108.777   6
   1   0   3 145.021 64.6642   2
   1   0   3 321.582 117.951   3
  -1   0  -3 348.891 86.9901   2
  -1   0  -3 354.872 104.787   3
   2   0   3 359.392 95.6394   2
  -2   0  -3 178.329 79.0850   2
   2   0   3 236.474 105.210   3
   3   0   3 146.022 98.9791   2
  -3   0  -3 165.526 84.6368   2
   3   0   3 132.224 123.022   3
   4   0   3 46.3242 122.153   3
   4   0   3 335.471 114.597   2
   5   0   3 377.873 169.563   3
   5   0   3-56.1856 112.457   2
   6   0   3 1506.98 259.953   2
   6   0   3 1047.57 257.121   3
   7   0   3 266.786 195.056   3
  -7   0  -3 466.234 216.186   4
   7   0   3 537.296 211.973   2
   8   0   3-188.921 222.200   2
  -8   0  -3 194.449 202.776   4
   8   0   3 338.115 231.688   3
   9   0   3-66.2905 241.554   3
  -9   0  -3-135.347 245.087   4
   9   0   3-72.8929 244.165   2
  10   0   3 183.053 214.362   2
 -10   0  -3 23.9679 223.680   4
  10   0   3 307.571 242.790   3
  11   0   3-37.6240 292.430   2
  11   0   3 110.604 238.198   3
 -11   0  -3-104.453 286.272   4
 -12   0  -3-201.998 272.043   4
  12   0   3 137.690 232.372   2
 -13   0  -3 426.414 305.210   4
  13   0   3 520.417 309.910   2
 -14   0  -3-373.434 416.310   4
  14   0   3-4.54783 270.224   2
  15   0   3 1.09888 309.217   2
 -15   0  -3-95.3710 358.419   4
 -16   0  -3-231.624 401.845   4
 -17   0  -3-393.110 455.432   4
 -18   0  -3 147.282 412.795   4
 -19   0  -3-379.746 491.799   4
 -20   0  -3-1489.27 723.239   4
  23  -1  -3 4477.47 890.543   1
  23   1  -3 3680.95 790.492   1
  22  -1  -3 15434.1 1421.40   1
  22   1  -3 15803.1 1464.67   1
  21   1  -3-59.2353 387.352   1
 -21   1   3-624.938 573.419   4
  21  -1  -3-281.162 377.533   1
 -20   1   3 1987.78 593.296   4
  20  -1  -3 2334.39 561.493   1
  20   1  -3 2250.88 551.349   1
 -19  -1   3 33235.5 2033.63   4
 -19   1   3 35756.5 2062.93   4
  19  -1  -3 35299.0 1987.21   1
 -18   1   3 24.0845 348.161   4
  18  -1  -3 280.910 379.837   1
 -18  -1   3 338.546 393.156   4
  17  -1  -3 30703.3 1714.24   1
 -17  -1   3 28305.5 1706.69   4
 -17   1   3 27231.0 1691.84   4
 -16   1   3 40687.5 2026.55   4
 -16  -1   3 41720.9 2031.95   4
  16  -1  -3 43690.5 2008.20   1
  15  -1  -3 67287.9 2495.78   1
 -15  -1   3 64369.4 2518.06   4
 -15   1   3 66695.6 2563.27   4
 -14  -1   3 2344.52 545.568   4
 -14   1   3 3315.28 574.472   4
  14  -1  -3 1642.11 459.842   2
  13  -1  -3 10612.8 883.463   2
 -13   1   3 10107.2 873.320   4
 -13  -1   3 11546.2 930.744   4
 -12   1   3 37577.6 1620.42   4
  12  -1  -3 34395.9 1568.98   2
 -12  -1   3 35150.1 1567.57   4
  11  -1  -3 69569.0 2261.97   2
 -11  -1   3 67811.9 2236.56   4
 -11   1   3 68740.5 2259.10   4
 -10   1   3 161983. 3985.67   4
  10  -1  -3 168381. 4046.54   2
 -10  -1   3 170394. 4026.48   4
   9  -1  -3 4340.04 484.006   2
  -9  -1   3 5595.08 528.255   4
  -9   1   3 4124.94 461.226   4
   8  -1  -3 24529.0 1050.48   2
  -8  -1   3 24959.3 1051.58   4
  -8   1   3 21915.0 1010.30   4
   7  -1  -3 478232. 9255.00   2
  -7  -1   3 489209. 9239.25   4
  -7   1   3 496852. 9259.20   4
  -6  -1   3 5369.20 409.857   4
   6  -1  -3 5707.73 421.234   2
   5  -1  -3 98919.3 2271.44   1
  -5  -1   3 96935.3 2199.65   4
   5  -1  -3 93217.1 2181.27   2
  -4   1   3 73240.2 1660.10   2
   4   1  -3 71581.0 1650.55   4
   4  -1  -3 70498.9 1633.94   2
  -3   1   3 20435.6 616.398   2
   3  -1  -3 19753.6 691.740   1
   3  -1  -3 19755.6 512.755   5
  -3   1   3 19092.7 685.688   1
   3   1  -3 19239.6 613.966   4
   3  -1  -3 19442.7 598.026   2
  -2   1   3 999999. 16977.3   1
  -2   1   3 992981. 16785.2   2
  -2   1   3 966909. 16743.9   5
   2  -1  -3 957901. 16758.1   5
   2  -1  -3 959072. 16959.3   1
  -2  -1   3 926136. 16925.4   5
   2   1  -3 933208. 16930.4   5
  -1  -1   3 13612.4 516.588   6
   1  -1  -3 15073.0 529.093   3
   1  -1  -3 14564.6 528.073   6
   1   1  -3 13416.9 527.086   5
   1   1  -3 14367.0 526.744   6
  -1   1   3 13489.4 512.523   3
  -1  -1   3 14071.7 527.080   5
   0  -1   3 27214.4 850.042   5
   0   1  -3 27526.4 833.479   6
   0  -1   3 27922.5 842.496   3
   0  -1  -3 28558.5 842.577   6
   0   1   3 28617.8 843.434   3
   0  -1  -3 27291.4 825.614   3
   0   1  -3 30400.6 874.403   3
  -1  -1  -3 221101. 4051.19   2
  -1  -1  -3 228381. 4036.10   4
  -1  -1  -3 234996. 4406.91   3
   1  -1   3 215866. 4355.25   3
   1   1   3 221395. 4371.73   3
   1  -1   3 221366. 4247.93   2
   1   1   3 223329. 4050.66   2
  -1   1  -3 229153. 4373.30   3
  -2   1  -3 20417.6 822.061   3
   2   1   3 23578.3 649.252   2
  -2   1  -3 24342.4 769.848   2
   2   1   3 23199.9 831.838   3
   2  -1   3 22427.4 751.963   2
  -2  -1  -3 23010.6 644.694   4
  -2  -1  -3 23027.0 657.561   2
   2  -1   3 22928.1 815.021   3
  -3  -1  -3 4892.56 299.116   2
   3  -1   3 4603.23 362.356   3
   3   1   3 4814.43 294.863   2
  -3  -1  -3 4565.65 292.241   4
   3   1   3 4814.34 382.241   3
   3  -1   3 4494.93 338.484   2
  -3   1  -3 5324.20 356.529   2
  -4  -1  -3 14860.9 616.195   4
   4   1   3 14726.3 619.137   2
   4  -1   3 16000.6 702.003   2
  -4  -1  -3 16184.3 646.296   2
   4   1   3 15074.6 735.430   3
   4  -1   3 14377.5 698.996   3
  -5  -1  -3 1414.45 218.878   4
   5  -1   3 1768.64 256.807   2
   5   1   3 2013.95 250.228   2
   5   1   3 1063.40 246.133   3
   5  -1   3 1443.49 242.665   3
  -6  -1  -3 15452.4 748.807   4
   6  -1   3 16809.7 855.845   3
   6   1   3 16495.0 872.526   3
   6  -1   3 16845.5 838.934   2
   6   1   3 16876.1 782.614   2
   7   1   3 823.030 226.959   2
   7   1   3 481.342 183.494   3
   7  -1   3 551.986 213.187   2
  -7  -1  -3 1075.27 253.303   4
   7  -1   3 815.996 187.979   3
   8   1   3 86607.0 2392.78   2
   8  -1   3 86801.1 2509.60   3
  -8  -1  -3 83122.4 2358.95   4
   8   1   3 86908.6 2575.68   3
   8  -1   3 82580.4 2449.11   2
   9  -1   3 46145.4 1769.60   3
   9   1   3 47588.2 1818.21   3
  -9   1  -3 42719.0 1669.51   4
   9  -1   3 43655.1 1689.06   2
   9   1   3 46641.7 1669.94   2
  -9  -1  -3 47545.3 1691.46   4
 -10  -1  -3 1349.20 345.539   4
 -10   1  -3 810.587 256.351   4
  10  -1   3 821.170 250.087   2
  10   1   3 957.424 321.731   3
  10  -1   3 1151.03 290.785   3
  10   1   3 1427.22 296.905   2
  11  -1   3 23103.6 1283.17   2
  11   1   3 24818.6 1288.37   2
  11  -1   3 25779.1 1368.76   3
 -11   1  -3 24512.4 1292.78   4
 -11  -1  -3 24304.7 1270.96   4
  11   1   3 23338.8 1338.29   3
  12  -1   3 92.8567 291.082   3
  12   1   3 185.776 223.559   2
 -12   1  -3 396.317 313.751   4
 -12  -1  -3 347.059 242.328   4
  12  -1   3 98.4287 245.392   2
 -13  -1  -3 15814.0 1102.74   4
  13   1   3 12448.3 981.773   2
  13  -1   3 12869.0 1045.51   2
 -13   1  -3 12508.0 1000.69   4
 -14  -1  -3 71984.5 2645.06   4
 -14   1  -3 68534.2 2657.31   4
  14  -1   3 68887.2 2675.02   2
 -15  -1  -3 3553.60 693.400   4
  15  -1   3 3870.52 686.482   2
 -15   1  -3 3607.86 698.668   4
 -16   1  -3 58848.6 2565.72   4
 -16  -1  -3 56877.8 2508.15   4
  16  -1   3 57283.2 2555.00   2
 -17  -1  -3 3814.62 741.405   4
 -17   1  -3 4820.89 781.146   4
  17  -1   3 4396.78 758.205   2
 -18  -1  -3 5678.68 841.823   4
 -18   1  -3 5077.98 793.919   4
 -19   1  -3 22450.6 1694.43   4
 -20   1  -3 284.541 476.758   4
  23  -2  -3 8731.90 1110.27   1
  23   2  -3 9903.68 1206.60   1
  22  -2  -3-47.3290 410.859   1
  22   2  -3 44.9886 403.956   1
  21  -2  -3 18033.6 1488.62   1
 -21   2   3 18618.0 1609.72   4
 -20   2   3-67.8992 397.823   4
  20  -2  -3 270.652 367.799   1
  19  -2  -3 15953.1 1311.43   1
 -19   2   3 14026.3 1333.64   4
  18  -2  -3 17479.7 1317.46   1
 -18   2   3 16172.6 1362.57   4
  17  -2  -3 3558.97 639.654   1
 -17   2   3 3051.48 641.919   4
 -16  -2   3 84477.9 3044.31   4
 -16   2   3 82359.3 3044.22   4
  16  -2  -3 86569.7 2982.46   1
  16  -2  -3 85770.2 3084.95   2
  15  -2  -3 46886.0 2023.10   1
  15  -2  -3 44760.7 2078.31   2
 -15   2   3 43967.2 2069.46   4
 -15  -2   3 45945.4 2066.56   4
  14  -2  -3 164.425 300.661   2
  14  -2  -3 77.8011 248.738   1
 -14   2   3-130.959 343.949   4
 -14  -2   3 169.702 300.047   4
  13  -2  -3 57122.3 2086.07   1
 -13  -2   3 55088.6 2104.13   4
 -13   2   3 48910.2 2033.54   4
  13  -2  -3 50673.8 2052.17   2
  12  -2  -3 62986.5 2245.22   2
  12  -2  -3 60630.9 2149.13   1
 -12   2   3 60408.4 2198.57   4
 -12  -2   3 63295.5 2221.64   4
  11  -2  -3 9792.57 754.006   1
  11  -2  -3 11344.8 836.751   2
 -11  -2   3 10416.9 809.080   4
  10  -2  -3 44565.0 1661.25   2
 -10  -2   3 43676.5 1644.47   4
  10  -2  -3 40740.4 1579.40   1
 -10   2   3 44328.2 1654.01   4
   9  -2  -3 7337.68 604.487   2
   9  -2  -3 7570.05 600.884   1
  -9  -2   3 6910.63 588.385   4
   8  -2  -3 250144. 5310.53   2
   8  -2  -3 242672. 5275.14   1
   7  -2  -3 42158.3 1398.33   1
   7  -2  -3 42658.2 1388.50   2
   6  -2  -3 34888.2 1182.98   1
   6  -2  -3 31849.6 1107.67   2
   5  -2  -3 3226.52 296.269   2
   5  -2  -3 2626.14 283.092   1
  -4   2   3 144444. 2972.88   2
   4  -2  -3 144376. 3067.80   1
   4   2  -3 140873. 2972.51   4
   4  -2  -3 144450. 2943.48   2
  -3   2   3 415895. 7409.57   2
  -3   2   3 411139. 7570.03   1
   3  -2  -3 398601. 7368.89   2
   2   2  -3 23506.5 765.991   5
  -2   2   3 22936.9 616.903   2
  -2   2   3 24051.1 693.183   3
   2  -2  -3 23331.1 602.822   2
  -2  -2   3 24145.5 771.251   5
  -1   2   3 316041. 5731.70   6
  -1  -2   3 307290. 5718.00   6
   1   2  -3 302748. 5709.93   6
   1   2  -3 294777. 5806.13   5
   1  -2  -3 319212. 5704.08   3
  -1   2   3 312202. 5700.16   3
  -1  -2   3 305868. 5805.18   5
   1  -2  -3 308322. 5717.33   6
   0  -2   3 520.808 134.950   5
   0  -2  -3 360.675 101.068   6
   0  -2   3 287.765 122.106   3
   0   2   3 162.657 89.8256   3
   0   2  -3 327.460 106.147   6
   0  -2  -3 162.839 80.7001   3
   1  -2   3 388081. 7276.75   3
  -1  -2  -3 399758. 7322.35   3
   1   2   3 383225. 7287.22   3
  -1   2  -3 390997. 7280.56   3
   1  -2   3 388067. 7268.14   2
   1   2   3 399815. 6982.35   4
   2   2   3 29039.8 769.418   4
   2   2   3 27810.1 949.368   3
  -2   2  -3 27655.4 918.931   2
  -2   2  -3 28278.9 920.067   3
   2  -2   3 27313.8 908.852   2
  -2  -2  -3 28553.8 726.510   2
   2  -2   3 26197.0 890.900   3
   3  -2   3 10181.2 319.134   1
  -3  -2  -3 10367.0 437.562   2
   3  -2   3 9709.76 526.126   3
   3   2   3 9766.09 424.401   2
   3   2   3 9880.33 447.187   4
   3   2   3 10555.3 576.358   3
   3  -2   3 9633.22 537.013   2
   4   2   3 443.152 145.596   3
   4   2   3 635.056 136.741   2
  -4  -2  -3 901.196 152.438   2
   4  -2   3 841.294 203.206   2
   4  -2   3 531.271 163.766   3
  -4  -2  -3 552.464 149.723   4
   5  -2   3 4069.80 391.389   3
   5  -2   3 3899.99 397.488   2
  -5  -2  -3 4461.29 363.161   4
   5   2   3 3975.48 406.692   3
   5   2   3 5446.85 387.351   2
   6   2   3 135081. 3295.28   3
   6  -2   3 130005. 3148.66   3
  -6  -2  -3 132537. 3027.20   4
   6   2   3 131991. 3007.89   2
   6  -2   3 130430. 3192.59   2
  -7  -2  -3 13005.4 737.893   4
   7  -2   3 13101.4 806.346   2
   7   2   3 12548.8 707.847   2
   7   2   3 12748.7 822.746   3
   7  -2   3 12182.1 762.449   3
   8   2   3 71032.2 2087.64   2
   8  -2   3 72308.6 2202.84   3
   8   2   3 70172.3 2276.71   3
   8  -2   3 72107.1 2231.62   2
  -8  -2  -3 68656.3 2076.62   4
   9  -2   3 8725.07 734.537   3
   9   2   3 9113.29 682.444   2
  -9  -2  -3 8513.74 666.545   4
   9  -2   3 8970.38 747.879   2
   9   2   3 8283.47 725.015   3
  10   2   3 29901.5 1475.04   3
  10  -2   3 29919.9 1406.74   3
  10  -2   3 27939.3 1392.45   2
  10   2   3 29691.7 1344.98   2
 -10  -2  -3 28879.0 1341.57   4
  11  -2   3 19092.9 1167.81   3
 -11   2  -3 17551.7 1127.81   4
 -11  -2  -3 18675.5 1099.44   4
  11  -2   3 18394.8 1162.57   2
  12  -2   3 326.189 253.577   2
 -12  -2  -3 301.750 305.975   4
 -12   2  -3 303.085 273.917   4
  12  -2   3-78.5852 311.503   3
 -13   2  -3 29335.8 1569.53   4
  13  -2   3 26627.8 1562.90   2
  13  -2   3 31478.1 1381.68   1
 -13  -2  -3 27764.9 1501.26   4
  14  -2   3 23884.4 1486.31   2
 -14  -2  -3 22875.2 1410.37   4
  14  -2   3 22648.8 1212.85   1
 -14   2  -3 20830.6 1391.83   4
  15  -2   3 15096.1 1227.00   2
 -15   2  -3 11792.7 1091.26   4
  15  -2   3 15608.8 1032.66   1
 -15  -2  -3 14699.5 1180.57   4
  16  -2   3-263.159 353.135   2
 -16   2  -3 582.045 429.872   4
  17  -2   3 42997.9 2265.51   2
 -17   2  -3 42933.0 2270.69   4
  18  -2   3 354.918 343.566   2
 -18   2  -3 99.3354 394.252   4
 -19   2  -3 8334.47 1070.77   4
 -20   2  -3 465.751 479.497   4
  22  -3  -3 14311.9 1343.47   1
 -21   3   3 60.0477 461.563   4
  21  -3  -3-97.4578 361.360   1
  20  -3  -3 65240.8 2846.86   1
 -20   3   3 62165.7 2951.72   4
  19  -3  -3 3471.14 685.840   1
 -19   3   3 2408.94 604.211   4
  18  -3  -3 12309.4 1113.30   1
 -18   3   3 12076.8 1186.81   4
  18  -3  -3 12547.5 1188.11   2
  17  -3  -3 2065.63 489.146   1
  17  -3  -3 2600.53 589.938   2
 -17   3   3 2126.54 523.169   4
  16  -3  -3 9384.32 895.107   1
 -16   3   3 7512.29 872.943   4
  16  -3  -3 9380.91 959.193   2
  15  -3  -3 1005.65 414.381   2
  15  -3  -3 1596.93 418.292   1
 -15   3   3 282.436 408.444   4
  14  -3  -3 32453.7 1581.44   1
  14  -3  -3 31802.8 1640.33   2
 -14   3   3 30862.0 1627.43   4
  13  -3  -3 733.768 299.014   1
  13  -3  -3 442.758 308.156   2
  12  -3  -3 3526.77 470.789   1
  12  -3  -3 2768.72 471.418   2
  11  -3  -3 51283.6 1842.65   1
  11  -3  -3 47731.1 1865.52   2
  10  -3  -3 31437.8 1352.25   1
  10  -3  -3 31138.3 1369.14   2
   9  -3  -3 35635.0 1405.28   1
   9  -3  -3 33495.1 1380.86   2
   8  -3  -3 42700.0 1513.85   1
   8  -3  -3 46778.2 1576.78   2
   7  -3  -3 880.243 213.513   2
   7  -3  -3 645.663 201.931   1
   6  -3  -3 13815.4 696.056   2
   6  -3  -3 14569.4 743.857   1
   5  -3  -3 85993.6 2070.98   2
   5  -3  -3 85404.1 2142.98   1
   4  -3  -3 393365. 7397.96   2
  -4   3   3 403817. 7422.66   2
   3  -3  -3 40995.5 1080.58   2
  -3   3   3 44183.3 1116.99   2
   2  -3  -3 2182.74 170.063   2
  -2  -3   3 2459.97 258.618   5
   2   3  -3 2445.02 266.695   5
  -2   3   3 2331.37 175.432   2
  -2   3   3 2456.58 181.579   3
   1  -3  -3 1453.93 153.891   3
  -1  -3   3 1306.99 161.091   6
  -1   3   3 939.158 134.446   3
  -1  -3   3 1172.26 184.290   5
   1   3  -3 1391.98 158.883   6
   1   3  -3 667.936 168.209   5
  -1   3   3 1064.97 146.383   6
   1  -3  -3 1357.04 108.120   2
   1  -3  -3 1165.61 147.605   6
   0   3  -3 236820. 4420.21   6
   0  -3   3 229432. 4462.52   3
   0  -3  -3 232461. 4431.67   3
   0   3   3 236792. 4427.53   3
   0  -3   3 232841. 4584.83   5
   0   3  -3 234008. 4598.31   5
  -1  -3  -3 554042. 9964.61   3
   1  -3   3 534366. 9911.16   3
  -1   3  -3 560701. 9929.72   3
   1  -3   3 539247. 10016.2   2
   1   3   3 539654. 9936.53   3
   2   3   3 21458.8 807.410   3
  -2   3  -3 20460.9 765.379   3
   2  -3   3 20100.5 808.667   2
   2   3   3 21309.3 657.011   4
  -2  -3  -3 20385.8 582.975   2
   2  -3   3 19715.6 748.820   3
  -3  -3  -3 28429.8 813.761   2
   3   3   3 28826.0 1031.71   3
   3  -3   3 27825.4 1034.00   2
   3   3   3 28799.8 874.123   4
   3  -3   3 27452.0 950.880   3
   4  -3   3 83095.0 2196.16   2
   4  -3   3 82507.4 2079.85   3
   4   3   3 83813.4 2204.82   3
  -4  -3  -3 79504.5 1916.42   2
   4  -3   3 85808.2 1735.79   1
   5  -3   3 347129. 6369.71   1
   5   3   3 341435. 6951.08   3
   5  -3   3 347764. 6932.90   2
   5  -3   3 347680. 6804.19   3
   6   3   3 2170.87 360.076   3
   6  -3   3 1504.78 254.604   3
   6  -3   3 1174.08 285.608   2
   6  -3   3 1484.40 188.639   1
   7  -3   3 69887.1 2072.54   3
   7   3   3 71541.1 2228.19   3
   7  -3   3 66293.6 2162.54   2
   7  -3   3 72306.0 1767.23   1
   8  -3   3 75734.0 2268.34   3
   8  -3   3 79408.4 1975.84   1
   8  -3   3 74585.9 2386.96   2
  -8  -3  -3 75887.0 2214.53   4
   8   3   3 77838.5 2435.00   3
   9  -3   3 126589. 2918.01   1
   9  -3   3 122718. 3389.85   2
   9   3   3 119797. 3424.81   3
   9  -3   3 123745. 3293.09   3
  -9  -3  -3 120463. 3178.84   4
  10  -3   3 17541.5 1111.60   2
 -10  -3  -3 19776.9 1091.58   4
  10  -3   3 19757.1 921.682   1
  10  -3   3 18455.3 1081.56   3
  10   3   3 18901.8 1186.57   3
 -11  -3  -3 129330. 3510.70   4
  11  -3   3 130297. 3582.16   3
  11  -3   3 131404. 3179.04   1
  12  -3   3 208.061 196.125   1
  12  -3   3 423.858 291.982   2
  12  -3   3 190.876 303.849   3
  13  -3   3 125981. 3872.11   2
 -13   3  -3 119647. 3770.20   4
  14  -3   3 9463.73 761.018   1
  14  -3   3 8823.88 955.225   2
 -14   3  -3 7013.50 871.980   4
  15  -3   3 7770.10 933.028   2
 -15   3  -3 7504.94 882.476   4
 -16   3  -3 32783.8 1903.22   4
  16  -3   3 31978.5 1878.38   2
 -17   3  -3 2162.42 644.387   4
  17  -3   3 13.1089 389.860   2
  18  -3   3 37042.3 2180.89   2
 -18   3  -3 36826.2 2159.48   4
  19  -3   3 5897.90 925.963   2
 -19   3  -3 6354.93 987.707   4
 -20   3  -3 1792.11 569.044   4
  22  -4  -3 2398.99 599.853   1
 -21   4   3 679.975 464.030   4
  21  -4  -3 209.226 342.686   1
  20  -4  -3 804.482 467.536   1
  20  -4  -3 1771.44 564.640   2
 -20   4   3 1063.71 589.006   4
 -19   4   3 49338.3 2526.19   4
  19  -4  -3 50196.8 2377.94   1
  19  -4  -3 48821.1 2511.75   2
  18  -4  -3 1113.16 458.532   2
 -18   4   3 1236.20 546.829   4
  18  -4  -3 1929.22 543.943   1
  17  -4  -3 6623.15 796.610   1
  17  -4  -3 6246.61 836.753   2
 -17   4   3 7308.67 893.763   4
 -16   4   3 17095.2 1293.34   4
  16  -4  -3 17772.2 1231.68   1
  16  -4  -3 17062.7 1317.71   2
 -15   4   3-376.440 468.811   4
  15  -4  -3 256.738 295.763   2
  15  -4  -3 204.497 313.796   1
  14  -4  -3 23050.0 1398.71   2
 -14   4   3 24076.6 1418.65   4
  14  -4  -3 25134.6 1395.63   1
  13  -4  -3 54872.5 2192.33   2
  13  -4  -3 55395.0 2116.44   1
  12  -4  -3 60877.2 2162.36   1
  12  -4  -3 62243.1 2260.99   2
  11  -4  -3 33538.6 1518.40   2
  11  -4  -3 34145.7 1488.58   1
  10  -4  -3 13974.0 885.701   1
  10  -4  -3 13787.8 901.203   2
   9  -4  -3 72.1613 198.921   1
   9  -4  -3 530.044 195.835   2
   8  -4  -3 3030.09 378.109   1
   8  -4  -3 2652.21 337.007   2
   7  -4  -3 44578.4 1509.06   2
   7  -4  -3 46512.7 1539.18   1
   6  -4  -3 3546.13 374.260   1
   6  -4  -3 3499.60 372.722   2
   5  -4  -3 49981.3 1452.08   2
   4  -4  -3 879.272 169.535   2
   3   4  -3 167204. 3541.95   5
   3  -4  -3 164808. 3369.66   2
  -3   4   3 167146. 3168.06   3
  -3   4   3 171230. 3397.98   2
  -2   4   3 2773.92 221.666   6
  -2  -4   3 2891.98 225.118   6
  -2   4   3 3070.28 230.086   2
   2  -4  -3 3376.15 233.355   2
   2   4  -3 3123.75 300.278   5
   2  -4  -3 3588.64 215.866   3
  -2   4   3 3112.74 204.660   3
   1   4  -3 66455.7 1474.15   6
  -1  -4   3 60945.0 1449.05   6
  -1   4   3 62529.9 1431.65   3
   1   4  -3 63742.1 1674.97   5
  -1   4   3 64010.4 1472.97   6
   1  -4  -3 62463.4 1441.09   3
   1  -4  -3 66884.2 1477.03   6
   1  -4  -3 60010.0 1363.41   2
   0   4  -3 92501.8 2272.46   5
   0  -4  -3 95879.4 2094.66   3
   0  -4   3 95659.2 2140.78   3
   0   4  -3 95474.8 2054.40   6
   0   4   3 95011.7 2075.13   3
   0  -4  -3 94107.3 2053.05   6
   1   4   3 99641.3 2269.54   3
   1  -4   3 100362. 2413.85   2
  -1  -4  -3 105818. 2311.48   3
   1  -4   3 99177.0 2245.06   3
   2  -4   3 264138. 5204.90   3
  -2   4  -3 278130. 5241.29   3
   2   4   3 266434. 5293.55   3
   2  -4   3 265300. 5405.73   2
   3  -4   3 43191.9 1272.68   3
  -3  -4  -3 41583.7 1116.22   2
   3  -4   3 42655.3 1418.11   2
   3   4   3 42349.9 1365.90   3
   4  -4   3 192671. 4238.39   2
  -4  -4  -3 190097. 3836.34   2
   4   4   3 195471. 4202.42   3
   4  -4   3 190799. 3998.00   3
   5  -4   3 90746.7 2295.92   3
   5   4   3 95343.0 2506.20   3
   5  -4   3 91262.3 2503.76   2
   6  -4   3 4177.55 408.571   3
   6   4   3 4201.59 459.056   3
   6  -4   3 4206.72 479.498   2
   6  -4   3 5371.76 338.086   1
   7  -4   3 109764. 3086.80   2
   7   4   3 111194. 3097.08   3
   7  -4   3 112523. 2900.28   3
   8   4   3 1697.01 394.603   3
   8  -4   3 1439.86 213.921   1
   8  -4   3 1654.04 309.812   3
   8  -4   3 1543.72 345.128   2
   9  -4   3 4075.49 480.120   3
   9  -4   3 3556.98 508.229   2
   9  -4   3 4133.06 384.956   1
   9   4   3 3362.99 498.894   3
  10  -4   3 151720. 3503.81   1
  10  -4   3 151733. 4097.72   2
  10  -4   3 153789. 3906.23   3
  11  -4   3 455.702 203.321   1
  11  -4   3 401.429 322.645   2
  11  -4   3 718.624 346.773   3
  12  -4   3 13896.8 833.730   1
  12  -4   3 13710.9 1077.93   2
  12  -4   3 12822.9 986.263   3
  13  -4   3 257.991 323.546   2
  13  -4   3 1648.82 348.989   1
  14  -4   3 20512.7 1119.37   1
 -14   4  -3 19826.8 1382.88   4
  14  -4   3 17169.8 1298.42   2
  15  -4   3 12825.9 1174.92   2
 -15   4  -3 11041.4 1079.29   4
  16  -4   3 839.776 427.466   2
 -16   4  -3 511.154 458.842   4
 -17   4  -3 1058.72 462.563   4
  17  -4   3 934.191 416.520   2
 -18   4  -3-5.96796 407.391   4
  18  -4   3 291.507 419.291   2
 -19   4  -3 27787.0 1958.74   4
  19  -4   3 26416.7 1898.25   2
  21  -5  -3 1913.36 711.631   2
  21  -5  -3 1850.82 630.946   1
 -21   5   3 494.663 482.074   4
  20  -5  -3 194.476 364.451   1
 -20   5   3 229.687 479.026   4
  20  -5  -3 686.285 500.750   2
  19  -5  -3 7878.29 943.689   1
  19  -5  -3 6274.59 930.765   2
 -19   5   3 7085.50 1000.78   4
  18  -5  -3 4454.82 780.156   2
  18  -5  -3 3088.54 595.834   1
 -18   5   3 3889.62 717.726   4
 -17   5   3 1208.86 464.548   4
  17  -5  -3 1986.37 486.764   1
  17  -5  -3 2098.37 564.547   2
  16  -5  -3 471.256 280.271   1
  16  -5  -3-33.5844 372.292   2
 -16   5   3-326.228 481.739   4
  15  -5  -3 11563.0 1051.83   2
  15  -5  -3 13398.0 1031.97   1
  14  -5  -3 33699.0 1761.85   2
  14  -5  -3 35311.9 1676.80   1
  13  -5  -3 339.292 218.667   1
  13  -5  -3 560.223 352.412   2
  12  -5  -3 5049.99 623.211   2
  12  -5  -3 4516.07 556.388   1
  11  -5  -3 18865.6 1081.54   1
  11  -5  -3 17771.4 1111.97   2
  10  -5  -3 28475.8 1302.21   1
  10  -5  -3 27796.5 1356.72   2
   9  -5  -3 13260.5 834.316   1
   9  -5  -3 13589.5 868.153   2
   8  -5  -3 1850.81 309.532   2
   7  -5  -3 14164.2 795.954   2
   6  -5  -3 6564.38 533.824   2
   5  -5  -3 13763.3 444.525   5
   5  -5  -3 14314.4 716.943   2
  -4   5   3 18270.9 522.914   3
   4  -5  -3 19533.5 779.771   2
   4  -5  -3 18716.2 471.253   5
  -3   5   3 32630.4 787.349   3
   3  -5  -3 33167.5 1030.37   2
   3   5  -3 32237.0 1126.53   5
  -3   5   3 35422.1 1055.94   2
  -2  -5   3 31747.6 881.797   6
  -2   5   3 30949.2 795.896   3
   2   5  -3 29830.3 1075.05   5
  -2   5   3 31253.8 884.677   6
   2  -5  -3 31572.7 811.224   3
   2  -5  -3 33316.8 953.664   2
   1  -5  -3 341.893 103.268   3
  -1  -5   3 389.322 96.1565   6
   1   5  -3 167.948 167.009   5
  -1   5   3 227.889 91.3419   6
   1  -5  -3 183.166 83.3851   2
   0  -5  -3 58862.7 1464.21   3
   0   5   3 56932.3 1435.77   3
   0   5  -3 60170.8 1414.68   6
   0   5  -3 54665.4 1652.26   5
   0  -5  -3 61139.9 1422.40   6
  -1   5  -3 61095.7 1474.57   6
  -1   5  -3 55675.9 1685.18   5
   1   5   3 57429.9 1515.96   3
   1  -5   3 59155.4 1503.78   3
   2   5   3 8094.29 494.921   3
   2  -5   3 6902.09 532.986   2
   2  -5   3 7861.41 445.634   3
   3  -5   3 1031.12 187.515   3
   3   5   3 969.922 209.400   3
  -3   5  -3 1267.84 145.475   1
   3  -5   3 1405.12 285.916   2
   4  -5   3 20438.1 993.131   2
   4  -5   3 20013.1 817.322   3
  -4   5  -3 20177.2 659.145   1
   4   5   3 19388.3 917.219   3
   5  -5   3 16160.2 919.769   2
   5  -5   3 16418.8 767.291   3
   5   5   3 16719.2 888.427   3
   6  -5   3 76.7588 179.920   3
   6  -5   3-176.117 248.441   2
   6   5   3-68.4495 235.696   3
   7   5   3 80.1580 234.494   3
   7  -5   3 80.1255 143.953   3
   7  -5   3-193.360 272.871   2
   8  -5   3 7462.55 700.123   2
   8  -5   3 6496.40 560.458   3
   8   5   3 6796.37 651.597   3
   9  -5   3 5298.67 523.262   3
   9  -5   3 5324.94 660.142   2
   9  -5   3 5271.84 439.487   1
  10  -5   3 7678.74 557.214   1
  10  -5   3 7635.27 790.131   2
  10  -5   3 7819.98 684.123   3
  11  -5   3 6455.33 767.378   2
  11  -5   3 5460.22 610.213   3
  12  -5   3 671.574 260.960   1
  12  -5   3 17.2934 341.801   3
  12  -5   3 1052.41 468.609   2
  13  -5   3 1148.02 267.572   1
  13  -5   3 972.730 361.323   2
  14  -5   3-99.1269 404.619   2
 -15   5  -3 6092.92 804.898   4
  15  -5   3 5659.79 780.408   2
 -16   5  -3 2011.65 614.927   4
  16  -5   3 742.889 423.819   2
  17  -5   3 252.450 392.863   2
 -17   5  -3 225.163 487.476   4
 -18   5  -3 318.996 398.853   4
  18  -5   3 785.980 471.001   2
 -19   5  -3 3813.89 774.639   4
  19  -5   3 6178.40 981.350   2
 -21   6   3 2695.69 769.421   4
  21  -6  -3 2559.28 681.473   2
 -20   6   3-773.867 597.677   4
  20  -6  -3 398.765 358.065   1
  20  -6  -3-379.393 495.125   2
  19  -6  -3 28427.5 1902.78   2
 -19   6   3 27315.0 1898.01   4
  19  -6  -3 27752.6 1759.75   1
  18  -6  -3 24180.1 1724.19   2
  18  -6  -3 25165.7 1587.29   1
 -18   6   3 24535.2 1724.30   4
 -17   6   3 8127.79 952.146   4
  17  -6  -3 8107.65 896.013   1
  17  -6  -3 8427.18 981.764   2
  16  -6  -3 14711.1 1142.53   1
  16  -6  -3 14118.5 1214.85   2
  15  -6  -3-455.914 404.699   2
  15  -6  -3 679.514 359.893   1
  14  -6  -3 14007.1 1052.64   1
  14  -6  -3 13498.6 1121.84   2
  13  -6  -3 124410. 3578.25   1
  13  -6  -3 124123. 3730.11   2
  12  -6  -3 9236.88 852.354   2
  12  -6  -3 9660.03 816.477   1
  11  -6  -3 76453.6 2591.72   2
  10  -6  -3 21276.6 1178.20   2
   9  -6  -3 68136.6 2237.56   2
  -8   6   3 44230.4 1182.66   3
   8  -6  -3 45139.1 1653.55   2
   7  -6  -3 24987.1 1133.06   2
  -7   6   3 26393.3 761.768   3
   6  -6  -3 11351.5 466.425   5
   6  -6  -3 11404.4 705.304   2
   5  -6  -3 109913. 2079.12   5
   5  -6  -3 108600. 2607.25   2
  -4   6   3 27308.4 635.454   3
   4  -6  -3 30664.5 1071.43   2
   3   6  -3 41617.3 1368.23   5
   3  -6  -3 43876.5 1279.92   2
  -3   6   3 39814.5 897.608   3
  -3   6   3 41407.1 951.590   5
   2  -6  -3 7288.21 432.094   2
  -2  -6   3 6973.62 350.953   6
   2  -6  -3 6694.85 304.757   3
  -2   6   3 6798.06 300.340   3
  -2   6   3 6702.38 348.412   6
  -1   6   3 280929. 5065.98   3
  -1   6   3 267813. 5067.77   6
   1  -6  -3 265633. 5079.88   3
   1   6  -3 271069. 5525.94   5
  -1  -6   3 281375. 5079.20   6
   0   6  -3 30078.0 857.385   6
   0  -6  -3 26399.2 879.962   3
   0  -6  -3 30654.1 866.199   6
   0   6   3 28991.8 894.932   3
   0   6  -3 26321.4 1089.38   5
   1   6   3 3654.93 313.534   3
  -1  -6  -3 2675.40 270.097   6
  -1   6  -3 3544.19 267.940   6
  -1   6  -3 3478.64 389.016   5
   1  -6   3 4466.79 329.473   3
   2   6   3 91030.3 2176.77   3
   2  -6   3 85052.1 2356.46   2
   2  -6   3 83747.3 2022.24   3
   3  -6   3 45952.4 1595.96   2
   3   6   3 43508.6 1420.31   3
   3  -6   3 43725.9 1275.07   3
   4   6   3 160425. 3655.94   3
   4  -6   3 154211. 3377.71   3
   4  -6   3 157413. 3795.21   2
  -4   6  -3 158796. 3221.57   1
   5   6   3 134391. 3298.23   3
   5  -6   3 129519. 2990.44   3
   5  -6   3 125040. 3357.90   2
  -5   6  -3 135299. 2813.27   1
   6  -6   3 2585.22 420.585   2
   6   6   3 2036.97 354.807   3
   6  -6   3 2954.93 350.575   3
   7  -6   3 38707.0 1629.82   2
   7   6   3 38510.9 1579.98   3
   7  -6   3 36728.7 1336.12   3
   8  -6   3 4535.18 468.294   3
   8  -6   3 4075.40 539.615   2
   9  -6   3 19706.1 1025.95   3
   9  -6   3 20198.8 1240.79   2
  10  -6   3 112697. 3075.93   3
  10  -6   3 109335. 3417.63   2
  11  -6   3 3162.15 475.527   3
  11  -6   3 2536.24 542.884   2
  12  -6   3 748.335 377.321   2
  12  -6   3 600.861 296.848   3
  13  -6   3 2014.55 523.025   2
  14  -6   3 29539.4 1784.36   2
  15  -6   3 8727.73 996.771   2
 -16   6  -3 3078.56 671.158   4
  16  -6   3 1406.79 421.573   2
  17  -6   3 2267.76 629.596   2
 -17   6  -3 3189.00 732.153   4
  18  -6   3 1253.64 468.498   2
 -18   6  -3 283.283 439.342   4
 -19   6  -3 10434.6 1231.44   4
  20  -7  -3 32655.5 2156.67   2
 -20   7   3 33002.1 2179.34   4
 -19   7   3-180.993 481.236   4
  19  -7  -3-351.185 497.771   2
  18  -7  -3 496.818 383.535   2
 -18   7   3 1684.92 510.641   4
  17  -7  -3 16203.9 1359.52   2
  16  -7  -3 7016.49 942.404   2
  15  -7  -3 37330.3 1993.95   2
  14  -7  -3 1603.92 512.692   2
  13  -7  -3 5985.38 721.460   2
  12  -7  -3 2047.49 464.104   2
  11  -7  -3 124660. 3607.94   2
  10  -7  -3 6607.17 677.506   2
  -9   7   3 9424.70 462.595   3
   9  -7  -3 9243.14 751.658   2
  -8   7   3 10973.2 457.547   3
   8  -7  -3 10601.6 786.815   2
   7  -7  -3 74020.6 1770.98   5
  -7   7   3 74025.9 1564.43   3
   7  -7  -3 77455.6 2295.55   2
   6  -7  -3 73270.8 1604.79   5
   6  -7  -3 73352.0 2120.16   2
   5  -7  -3 67424.4 1507.67   5
   5  -7  -3 68832.9 1981.69   2
   4  -7  -3 112670. 2751.94   2
   3  -7  -3 85140.8 2108.25   2
   3   7  -3 84582.7 2244.00   5
  -3   7   3 82911.9 1730.30   5
  -2   7   3 19882.8 654.262   6
   2   7  -3 21214.5 960.083   5
  -2   7   3 20775.8 594.356   3
   2  -7  -3 20759.6 832.802   2
  -2   7   3 20027.4 655.745   5
   2  -7  -3 18688.7 590.509   3
  -2  -7   3 22632.4 679.165   6
  -1   7   3 314.992 95.9506   3
   1  -7  -3 302.071 89.9573   3
   1  -7  -3 361.407 153.801   2
   0   7  -3 11524.5 482.387   6
   0   7  -3 10856.2 683.304   5
   0   7   3 13217.9 560.705   3
   0  -7  -3 12217.5 490.121   6
   0  -7  -3 12533.3 561.628   3
  -1   7  -3 11673.9 509.589   6
  -1   7  -3 10619.4 704.819   5
   1   7   3 11660.4 576.870   3
   1  -7   3 10915.5 556.103   3
  -1  -7  -3 12031.5 541.306   6
   2   7   3 128237. 2904.04   3
   2  -7   3 120037. 3173.19   2
   2  -7   3 126164. 2752.49   3
   3   7   3 18130.8 849.970   3
   3  -7   3 16018.5 688.922   3
   3  -7   3 16379.1 926.189   2
   4  -7   3 6451.16 434.713   3
   4  -7   3 5994.15 586.672   2
   4   7   3 6366.55 529.545   3
   5   7   3 15162.1 862.504   3
   5  -7   3 14920.6 711.103   3
   5  -7   3 13822.1 917.450   2
   6  -7   3 27481.1 1061.59   3
   6  -7   3 29107.7 1393.98   2
   7  -7   3 615.501 257.086   2
   7  -7   3 488.181 184.539   3
   8  -7   3 7615.39 579.674   3
   8  -7   3 7790.54 772.787   2
   9  -7   3 6176.94 714.351   2
   9  -7   3 6631.13 580.636   3
  10  -7   3 5963.07 756.148   2
  10  -7   3 6612.74 612.991   3
  11  -7   3 22202.2 1427.13   2
  11  -7   3 23540.7 1229.12   3
  12  -7   3 58219.7 2482.25   2
  12  -7   3 56444.4 2108.31   3
  13  -7   3 7080.93 870.926   2
  14  -7   3 1281.07 501.081   2
  15  -7   3 2554.87 620.014   2
  16  -7   3-555.949 548.857   2
 -17   7  -3 11977.1 1253.59   4
  17  -7   3 10712.8 1212.79   2
 -18   7  -3 25825.5 1894.34   4
  18  -7   3 23977.1 1848.31   2
 -19   7  -3-112.722 480.946   4
 -20   8   3 1802.37 664.766   4
  20  -8  -3 3859.87 861.655   2
  19  -8  -3 757.521 435.966   2
 -19   8   3 239.777 518.650   4
  18  -8  -3 3564.77 684.276   2
  17  -8  -3 7817.47 955.348   2
  16  -8  -3 104897. 3745.18   2
  15  -8  -3 15685.3 1282.93   2
  14  -8  -3 1808.82 511.149   2
  13  -8  -3 62920.7 2535.32   2
  12  -8  -3 72297.9 2650.94   2
  11  -8  -3 9061.61 856.879   2
  10  -8  -3 87017.5 2818.99   2
  -9   8   3 1692.14 183.955   3
   9  -8  -3 895.328 351.339   2
   8  -8  -3 402376. 8072.32   2
  -8   8   3 378184. 6871.10   3
   7  -8  -3 24881.1 855.418   5
   7  -8  -3 27731.9 1257.54   2
   6  -8  -3 73080.6 1703.07   5
   6  -8  -3 73302.7 2230.49   2
   5  -8  -3 51742.0 1711.58   2
   4   8  -3 124761. 3165.93   5
   4  -8  -3 128392. 3097.35   2
  -3  -8   3 94346.6 2111.07   6
  -3   8   3 101389. 2141.38   6
   3   8  -3 102334. 2679.87   5
  -3   8   3 101418. 2160.07   5
   3  -8  -3 99245.9 2516.85   2
   2  -8  -3 1027.96 126.685   3
  -2  -8   3 867.170 128.124   6
  -2   8   3 859.573 127.542   6
   2   8  -3 746.523 256.486   5
   2  -8  -3 646.316 166.930   2
  -2   8   3 686.236 143.116   5
   1   8  -3 118286. 2966.13   5
   1  -8  -3 121285. 2489.16   3
   0   8   3 8197.67 442.785   3
   0   8  -3 7446.43 595.697   5
  -1   8  -3 212839. 4106.72   6
   1   8   3 207453. 4293.60   3
   1  -8   3 214367. 4269.02   3
  -1  -8  -3 214240. 4127.79   6
   2   8   3 31531.4 1118.40   3
   2  -8   3 30594.1 1348.61   2
  -2   8  -3 30016.7 1266.63   5
   2  -8   3 29304.7 985.725   3
   3  -8   3 17049.6 719.376   3
   3  -8   3 18028.1 1015.39   2
   4  -8   3 12872.6 626.211   3
   4  -8   3 12942.2 921.211   2
   5  -8   3 1180.37 294.308   2
   5  -8   3 2114.68 268.862   3
   6  -8   3 52576.4 2041.37   2
   6  -8   3 53848.2 1603.90   3
   7  -8   3 85112.6 2837.90   2
   7  -8   3 87475.5 2307.17   3
   8  -8   3 57958.0 2261.16   2
   8  -8   3 57648.0 1810.38   3
   9  -8   3 55.0950 304.905   2
   9  -8   3 1137.88 261.199   3
  10  -8   3 371.887 295.897   2
  10  -8   3 524.534 203.777   3
  11  -8   3-62.6187 362.422   2
  11  -8   3 45.7782 219.045   3
  12  -8   3 1617.06 470.825   2
  12  -8   3 952.224 298.104   3
  13  -8   3 56938.5 2574.96   2
  14  -8   3 126.540 358.121   2
  15  -8   3 4152.43 742.118   2
  16  -8   3-197.807 364.513   2
  17  -8   3 62453.5 3012.34   2
 -18   8  -3 2365.03 637.365   4
  18  -8   3 2781.81 695.138   2
 -20   9   3 9731.72 1225.52   4
  20  -9  -3 13126.3 1382.25   2
  19  -9  -3 9332.38 1137.48   2
  18  -9  -3 2197.11 654.968   2
  17  -9  -3 144.637 460.609   2
  16  -9  -3 28814.6 1833.51   2
  15  -9  -3 21930.0 1552.12   2
  14  -9  -3 395.585 339.530   2
  13  -9  -3 5136.87 700.622   2
  12  -9  -3 28819.9 1612.56   2
  11  -9  -3 7289.67 785.549   2
  10  -9  -3 53058.9 2125.24   2
   9  -9  -3 6686.98 709.335   2
   8  -9  -3 30308.1 1442.03   2
   7  -9  -3 188598. 4534.97   2
   6  -9  -3 64.6395 241.207   2
   6  -9  -3 252.225 97.1559   5
   5  -9  -3 89986.4 2571.56   2
   4  -9  -3 4031.38 441.592   2
   4   9  -3 3200.55 444.854   5
  -4   9   3 3166.01 278.624   5
  -3  -9   3 16898.6 589.022   6
  -3   9   3 14545.3 559.648   6
  -3   9   3 16404.7 657.797   5
   3  -9  -3 17122.7 876.125   2
   3   9  -3 14833.5 873.479   5
   2   9  -3 106012. 2813.99   5
  -2   9   3 97526.7 2154.87   6
   2  -9  -3 108885. 2152.03   3
   2  -9  -3 103427. 2655.20   2
  -2  -9   3 105785. 2171.78   6
  -2   9   3 105536. 2365.68   5
   1  -9  -3 5478.49 340.276   3
   1  -9  -3 6080.73 496.692   2
   0   9  -3 157003. 3809.26   5
  -1  -9  -3 491.275 116.416   6
  -1   9  -3 197.344 224.611   5
  -1   9  -3 469.608 114.568   6
   1  -9   3 388.873 152.595   3
   2  -9   3 18221.3 743.558   3
  -2   9  -3 18733.2 702.739   6
   2  -9   3 19899.6 1104.59   2
  -2   9  -3 16679.9 967.559   5
  -2  -9  -3 16433.5 693.130   6
   3  -9   3 74666.8 2425.56   2
   3  -9   3 73708.5 1866.79   3
   4  -9   3 45893.3 1345.65   3
   4  -9   3 43241.9 1811.85   2
   5  -9   3 35419.5 1170.69   3
   5  -9   3 34766.8 1609.54   2
   6  -9   3 2192.32 503.058   2
   6  -9   3 1366.30 255.293   3
   7  -9   3 32184.3 1624.76   2
   7  -9   3 31445.0 1183.91   3
   8  -9   3 5799.67 714.582   2
   8  -9   3 4324.90 449.807   3
   9  -9   3 71451.8 2115.48   3
   9  -9   3 63832.8 2584.75   2
  10  -9   3 65.2647 364.140   2
  10  -9   3-91.8590 207.756   3
  11  -9   3 2875.87 598.453   2
  11  -9   3 2391.61 383.853   3
  12  -9   3 24873.5 1654.53   2
  13  -9   3 285.650 325.727   2
  14  -9   3 64998.8 2918.30   2
  15  -9   3 14373.9 1341.01   2
  16  -9   3 1546.84 546.200   2
  17  -9   3 23948.2 1834.53   2
  19 -10  -3 5267.58 892.410   2
  18 -10  -3 7630.64 1023.47   2
  17 -10  -3 3.67025 400.044   2
  16 -10  -3 8995.01 1078.32   2
  15 -10  -3 2223.40 604.559   2
  14 -10  -3 6939.49 869.629   2
  13 -10  -3 232.413 318.807   2
  12 -10  -3 873.081 340.955   2
  11 -10  -3 1583.16 451.614   2
  10 -10  -3 6940.76 760.397   2
   9 -10  -3 2440.91 475.701   2
   8 -10  -3 220.151 249.510   2
   7 -10  -3 5561.21 623.734   2
   6 -10  -3 39284.2 1618.31   2
   5 -10  -3 9313.86 713.058   2
   4  10  -3 2333.11 394.577   5
   4 -10  -3 2309.71 364.154   2
  -4  10   3 2688.25 280.360   5
  -3  10   3 27954.0 968.712   5
  -3 -10   3 28135.1 804.593   6
  -3  10   3 27859.3 802.068   6
   3 -10  -3 25555.3 1173.67   2
   3  10  -3 27598.7 1282.73   5
   2 -10  -3 108727. 2228.55   3
   2  10  -3 109643. 2972.85   5
  -2  10   3 113629. 2553.13   5
   1  10  -3 25328.0 1209.06   5
  -1  10   3 25360.3 966.712   5
   1 -10  -3 25324.6 1114.97   2
   1 -10  -3 25480.7 837.550   3
   0  10  -3 1690.50 362.417   5
  -1  10  -3 26401.8 1255.03   5
   1 -10   3 27166.7 969.524   3
  -1 -10  -3 26284.7 797.478   6
   1 -10   3 23556.0 1265.38   2
  -1  10  -3 26966.0 800.893   6
  -2  10  -3 112387. 3133.42   5
   2 -10   3 118069. 2630.82   3
  -2 -10  -3 113703. 2519.42   6
   2 -10   3 116157. 3311.52   2
  -2  10  -3 115337. 2500.35   6
   3 -10   3 105292. 2441.31   3
   3 -10   3 102716. 3088.73   2
   4 -10   3 1336.95 395.634   2
   4 -10   3 1523.46 213.328   3
   5 -10   3 26550.4 977.022   3
   5 -10   3 27966.6 1466.67   2
   6 -10   3 79935.7 2076.30   3
   6 -10   3 79782.7 2779.72   2
   7 -10   3 100403. 3300.60   2
   7 -10   3 103631. 2551.37   3
   8 -10   3 4623.91 455.628   3
   8 -10   3 5036.12 708.295   2
   9 -10   3 38940.8 1990.90   2
   9 -10   3 42923.2 1517.51   3
  10 -10   3 37240.2 1978.58   2
  10 -10   3 40037.4 1513.37   3
  11 -10   3 66685.6 2808.56   2
  12 -10   3 16560.6 1378.16   2
  13 -10   3 4694.47 812.589   2
  14 -10   3 23374.2 1722.76   2
  15 -10   3 17959.5 1558.48   2
  16 -10   3 8803.76 1125.79   2
  17 -10   3 803.937 525.370   2
  19 -11  -3 301.058 479.740   2
  18 -11  -3 9474.99 1169.92   2
  17 -11  -3 22797.6 1730.46   2
  16 -11  -3 3412.52 746.454   2
  15 -11  -3 164.650 373.051   2
  14 -11  -3 6481.06 809.238   2
  13 -11  -3 15352.7 1263.13   2
  12 -11  -3-69.2832 389.149   2
  11 -11  -3 15044.7 1183.38   2
  10 -11  -3 2194.77 505.176   2
   9 -11  -3 24228.9 1404.94   2
   8 -11  -3 71911.7 2552.73   2
   7 -11  -3 71097.4 2451.52   2
   6 -11  -3 30804.8 1457.65   2
   5 -11  -3 1885.85 384.701   2
   5  11  -3 1811.14 378.561   5
  -4  11   3 10488.6 470.529   6
  -4 -11   3 11318.8 479.222   6
   4  11  -3 11015.0 824.866   5
  -4  11   3 11365.9 605.889   5
   4 -11  -3 10787.9 786.008   2
  -3  11   3 8698.36 382.777   6
  -3 -11   3 10557.7 419.512   6
   3  11  -3 8774.66 731.974   5
   3 -11  -3 9507.46 735.415   2
  -3  11   3 9535.11 564.878   5
   2  11  -3 63415.8 2102.71   5
  -2  11   3 60991.5 1699.71   5
   2 -11  -3 58880.0 1365.74   3
  -1  11   3 124142. 2912.51   5
   1 -11  -3 121671. 2635.71   3
   1  11  -3 124155. 3305.57   5
   1 -11  -3 119678. 3147.56   2
   0  11  -3 26975.6 1309.38   5
  -1  11  -3 3368.27 480.195   5
   1 -11   3 2817.40 311.241   3
   1 -11   3 2627.14 503.690   2
  -2 -11  -3 8061.32 420.662   6
  -2  11  -3 7993.77 414.215   6
  -2  11  -3 6836.04 665.183   5
   2 -11   3 7393.81 756.342   2
   2 -11   3 7290.79 471.793   3
   3 -11   3 6096.82 429.846   3
   3 -11   3 6589.90 696.479   2
   4 -11   3 30987.2 1039.72   3
   4 -11   3 28661.1 1543.46   2
   5 -11   3 11229.8 595.006   3
   5 -11   3 8546.15 850.693   2
   6 -11   3 12931.6 1072.25   2
   6 -11   3 14561.5 707.027   3
   7 -11   3 8324.24 544.930   3
   7 -11   3 8927.15 901.995   2
   8 -11   3 71356.3 2006.40   3
   8 -11   3 69627.1 2757.54   2
   9 -11   3 17720.8 1338.61   2
  10 -11   3 17033.9 1345.40   2
  11 -11   3 160.947 393.250   2
  12 -11   3 470.105 352.773   2
  13 -11   3 21145.1 1610.35   2
  14 -11   3 41699.3 2375.56   2
  15 -11   3 9468.76 1156.26   2
  16 -11   3 10790.8 1256.25   2
  18 -12  -3-353.038 480.554   2
  17 -12  -3 2870.17 698.839   2
  16 -12  -3 4527.96 836.194   2
  15 -12  -3 66029.3 2953.42   2
  14 -12  -3 3552.51 668.775   2
  13 -12  -3 5209.36 774.456   2
  12 -12  -3 472.612 363.416   2
  11 -12  -3 9177.59 967.308   2
  10 -12  -3 18892.4 1322.85   2
   9 -12  -3 59526.0 2366.76   2
   8 -12  -3 611.977 300.206   2
   7 -12  -3 921.985 306.922   2
   6 -12  -3 6474.17 675.034   2
   5 -12  -3 42528.5 1783.70   2
   5  12  -3 42459.0 1784.39   5
   4  12  -3 7636.68 729.574   5
   4 -12  -3 6648.41 663.646   2
  -4  12   3 8045.72 543.053   5
  -4 -12   3 7363.15 358.140   6
  -4  12   3 7096.18 350.717   6
  -3  12   3 42110.7 1387.45   5
   3  12  -3 40460.9 1717.50   5
   3 -12  -3 39102.4 1627.46   2
  -2  12   3 3792.90 411.957   5
   2  12  -3 4377.22 564.905   5
   2 -12  -3 3220.72 458.016   2
   2 -12  -3 3301.31 233.410   3
   1  12  -3 15678.5 1004.91   5
   1 -12  -3 15210.9 947.951   2
  -1  12   3 16516.3 838.001   5
   1 -12  -3 14908.3 636.010   3
   0 -12  -3 56329.9 1980.86   2
   0  12  -3 61843.8 2170.77   5
   0  12   3 61576.6 1871.23   5
   1 -12   3 138975. 3062.68   3
   1 -12   3 125772. 3779.10   2
  -1  12  -3 131296. 3620.05   5
   2 -12   3 31764.7 1595.89   2
  -2  12  -3 31681.8 1484.18   5
   2 -12   3 32436.1 1072.48   3
   3 -12   3 9471.86 531.427   3
   3 -12   3 8821.59 862.809   2
   4 -12   3 13343.0 637.923   3
   4 -12   3 13847.1 1084.96   2
   5 -12   3 28716.0 998.201   3
   5 -12   3 26917.7 1555.16   2
   6 -12   3 129190. 3960.77   2
   6 -12   3 130200. 2921.35   3
   7 -12   3 118.379 378.279   2
   8 -12   3 34088.6 1895.38   2
   9 -12   3 6033.32 862.680   2
  10 -12   3 61357.1 2723.31   2
  11 -12   3 15596.8 1362.76   2
  12 -12   3 267.542 446.089   2
  13 -12   3 3905.76 779.809   2
  14 -12   3 45240.8 2520.99   2
  15 -12   3 9753.70 1203.60   2
  16 -12   3 3149.68 747.604   2
  18 -13  -3 4.37558 419.491   2
  17 -13  -3 135.228 404.411   2
  16 -13  -3 9902.98 1176.83   2
  15 -13  -3 6858.44 976.536   2
  14 -13  -3 3286.08 670.723   2
  13 -13  -3 937.653 470.728   2
  12 -13  -3 2281.38 592.126   2
  11 -13  -3 30719.3 1800.38   2
  10 -13  -3 11877.2 1075.09   2
   9 -13  -3 5004.61 692.403   2
   8 -13  -3 80.0826 312.067   2
   7 -13  -3 86.8446 297.685   2
   6 -13  -3 27258.3 1477.51   2
   6  13  -3 27722.5 1478.29   5
  -5 -13   3 7453.06 398.090   6
   5  13  -3 8435.93 779.171   5
   5 -13  -3 6309.81 693.519   2
  -4  13   3 144434. 3285.58   5
  -4 -13   3 132035. 2658.85   6
   4  13  -3 144543. 3856.84   5
   4 -13  -3 144183. 3825.12   2
   3 -13  -3 2768.20 454.129   2
  -3  13   3 2653.76 367.097   5
   3  13  -3 2963.87 515.822   5
  -2  13   3 862.018 259.533   5
   2  13  -3 739.506 298.589   5
   2 -13  -3 1302.44 368.889   2
   1 -13  -3 25642.2 1298.98   2
  -1  13   3 23503.4 1076.19   5
   1  13  -3 22703.8 1275.97   5
   0  13   3 25550.3 1155.27   5
   0  13  -3 25692.1 1358.83   5
   0 -13  -3 25333.9 1284.19   2
   1 -13   3 48601.1 2127.84   2
   1 -13   3 48481.8 1486.60   3
  -1  13  -3 49590.0 1987.74   5
  -2  13  -3 31343.7 1542.19   5
   2 -13   3 32069.2 1680.04   2
   2 -13   3 31560.3 1086.56   3
   3 -13   3 4764.84 383.098   3
   3 -13   3 4327.13 674.019   2
   4 -13   3 60528.6 1597.48   3
   4 -13   3 58591.3 2461.67   2
   5 -13   3 59519.1 2489.02   2
   6 -13   3 7521.84 864.056   2
   7 -13   3 5048.40 758.444   2
   8 -13   3 23299.7 1600.94   2
   9 -13   3 26555.6 1742.71   2
  10 -13   3 14549.8 1315.01   2
  11 -13   3 39470.2 2247.75   2
  12 -13   3-296.569 454.055   2
  13 -13   3 40118.2 2361.16   2
  14 -13   3 4118.15 809.785   2
  15 -13   3 159.996 450.430   2
  17 -14  -3 34691.2 2270.50   2
  16 -14  -3 3042.00 671.119   2
  15 -14  -3 8715.43 1053.89   2
  14 -14  -3 35458.6 2136.49   2
  13 -14  -3 3074.46 645.611   2
  12 -14  -3 89126.2 3418.60   2
  11 -14  -3 417.058 395.482   2
  10 -14  -3-4.70069 336.513   2
   9 -14  -3 47274.1 2195.12   2
   8 -14  -3 26836.5 1591.82   2
   7  14  -3 20526.6 1340.02   5
   7 -14  -3 20900.6 1360.83   2
   6 -14  -3 7888.98 832.790   2
   6  14  -3 8660.95 868.934   5
   5 -14  -3 27485.7 1504.59   2
   5  14  -3 28494.8 1524.89   5
  -4  14   3 21325.6 1019.43   5
   4 -14  -3 21359.5 1290.27   2
   4  14  -3 21504.8 1315.84   5
  -3  14   3 34648.4 1349.34   5
   3  14  -3 35179.8 1686.60   5
   3 -14  -3 33978.9 1642.40   2
  -2  14   3 11343.7 739.166   5
   2 -14  -3 13888.3 989.864   2
   2  14  -3 11828.1 943.883   5
  -1  14   3 1865.59 328.951   5
   1  14  -3 1401.88 348.471   5
   1 -14  -3 1408.97 350.052   2
   0  14  -3 50625.8 2075.00   5
   0  14   3 51368.1 1804.75   5
   0 -14  -3 52019.0 2007.72   2
   1 -14   3 1858.82 299.960   3
  -1  14  -3 1039.98 407.422   5
   1 -14   3 1868.08 501.543   2
   1  14   3 1185.03 322.134   5
  -2  14  -3 20477.2 1261.46   5
   2 -14   3 19734.3 831.436   3
   2 -14   3 17999.3 1325.28   2
   3 -14   3 54240.0 2339.71   2
   4 -14   3 4191.13 697.367   2
   5 -14   3 84977.3 3162.64   2
   6 -14   3 17348.9 1326.61   2
   7 -14   3 1106.32 410.503   2
   8 -14   3 12801.7 1187.42   2
   9 -14   3 14060.2 1296.91   2
  10 -14   3 11149.6 1194.49   2
  11 -14   3 2261.23 595.359   2
  12 -14   3 8004.77 1073.15   2
  13 -14   3 2597.26 658.840   2
  14 -14   3 601.457 416.705   2
  16 -15  -3 3550.55 787.691   2
  15 -15  -3 429.105 442.760   2
  14 -15  -3 61265.0 2952.59   2
  13 -15  -3 2003.43 647.974   2
  12 -15  -3 3527.35 709.411   2
  11 -15  -3 9085.89 1044.97   2
  10 -15  -3 22949.1 1578.14   2
   9 -15  -3 3240.37 623.111   2
   8 -15  -3 17358.3 1306.47   2
   8  15  -3 17623.1 1300.98   5
   7 -15  -3 20655.3 1389.52   2
   7  15  -3 22024.0 1434.64   5
   6 -15  -3 32043.9 1734.72   2
   6  15  -3 32369.6 1723.15   5
   5  15  -3 19595.5 1313.00   5
   5 -15  -3 17945.6 1267.91   2
   4  15  -3 15473.3 1150.33   5
   4 -15  -3 15876.1 1150.56   2
  -4  15   3 15697.2 900.221   5
  -3  15   3 10422.2 741.437   5
   3  15  -3 8618.01 852.421   5
   3 -15  -3 10570.5 915.715   2
   2  15  -3 9452.15 883.690   5
  -2  15   3 9650.96 729.314   5
   2 -15  -3 10990.3 923.960   2
  -1  15   3 10680.3 767.761   5
   1 -15  -3 10205.0 885.266   2
   1  15  -3 10294.3 912.123   5
   0 -15   3 993.305 407.979   2
   0  15  -3 578.420 341.361   5
   0  15   3 577.065 242.219   5
   0 -15  -3 1128.00 364.473   2
   1 -15   3 16617.0 1283.24   2
   1  15   3 20060.1 1116.53   5
  -1  15  -3 16078.1 1163.83   5
   2 -15   3 125.090 315.976   2
  -2  15  -3-171.954 343.260   5
   3 -15   3 15078.3 1251.90   2
   4 -15   3 3521.04 688.391   2
   5 -15   3 19853.8 1466.81   2
   6 -15   3 1135.74 396.225   2
   7 -15   3-459.734 482.969   2
   8 -15   3 1545.34 490.489   2
   9 -15   3 396.996 361.234   2
  10 -15   3-820.258 575.503   2
  11 -15   3 7215.96 1054.19   2
  12 -15   3-250.250 440.565   2
  13 -15   3-557.242 527.277   2
  14 -15   3 2922.18 738.480   2
  16 -16  -3-238.721 623.841   2
  15 -16  -3 133.114 405.405   2
  14 -16  -3 977.172 512.661   2
  13 -16  -3 31629.3 2066.83   2
  12 -16  -3 37411.0 2219.33   2
  11 -16  -3 5513.00 841.318   2
  10 -16  -3 2116.00 599.568   2
   9 -16  -3-102.525 467.556   2
   9  16  -3 413.600 398.727   5
   8 -16  -3 691.594 402.425   2
   8  16  -3 22.7234 403.184   5
   7  16  -3 2480.80 493.870   5
   7 -16  -3 4025.23 668.595   2
   6  16  -3 28520.6 1661.75   5
   6 -16  -3 27477.9 1648.87   2
   5  16  -3 6434.38 777.520   5
   5 -16  -3 5913.76 764.762   2
   4  16  -3 5643.29 754.381   5
   4 -16  -3 6898.52 798.906   2
   3  16  -3 12918.8 1070.29   5
  -3  16   3 12474.4 853.875   5
   3 -16  -3 13034.6 1061.52   2
   2 -16  -3 63219.5 2470.45   2
   2  16  -3 68830.5 2572.44   5
  -2  16   3 63564.5 2137.38   5
  -1  16   3-228.153 252.774   5
   1  16  -3 171.675 317.833   5
   1 -16  -3-25.1822 282.488   2
   0  16  -3 549.852 298.593   5
   0  16   3 1279.47 346.945   5
   0 -16  -3 1232.71 368.678   2
   0 -16   3 974.156 479.327   2
   1 -16   3 3286.02 630.187   2
  -1 -16  -3 2347.06 501.583   2
  -1  16  -3 2799.06 541.864   5
   1  16   3 2597.89 447.693   5
   2  16   3 4224.84 560.720   5
  -2  16  -3 4157.18 642.530   5
   2 -16   3 3134.72 607.533   2
   3 -16   3 44174.9 2231.90   2
   4 -16   3 61163.9 2747.10   2
   5 -16   3 2669.27 651.760   2
   6 -16   3 21528.3 1607.16   2
   7 -16   3 15675.6 1395.47   2
   8 -16   3 9038.82 1088.26   2
   9 -16   3 30207.7 2013.53   2
  10 -16   3 2490.48 618.127   2
  11 -16   3 40255.3 2412.54   2
  12 -16   3 3770.00 846.698   2
  13 -16   3 7390.95 1117.71   2
  15 -17  -3 3373.02 808.736   2
  14 -17  -3 940.183 491.964   2
  13 -17  -3 16746.1 1500.62   2
  12 -17  -3 616.750 516.019   2
  11 -17  -3 48195.7 2509.64   2
  10 -17  -3 519.060 390.765   2
  10  17  -3 258.277 416.139   5
   9  17  -3 4241.51 711.319   5
   9 -17  -3 4715.75 738.849   2
   8  17  -3 1017.31 424.493   5
   8 -17  -3 168.147 383.722   2
   7 -17  -3 29490.9 1805.24   2
   7  17  -3 29663.9 1765.51   5
   6 -17  -3 9192.96 1010.92   2
   6  17  -3 10647.1 1041.98   5
   5 -17  -3 29167.2 1724.34   2
   5  17  -3 29944.4 1731.27   5
   4 -17  -3 6353.46 817.582   2
   4  17  -3 5576.03 732.394   5
   3  17  -3 32403.2 1779.54   5
   3 -17  -3 34178.4 1814.82   2
   2  17  -3 2970.02 565.598   5
   2 -17  -3 2646.84 483.963   2
  -1  17   3 14934.4 982.123   5
   1 -17  -3 13083.5 1078.49   2
   1  17  -3 14768.2 1159.86   5
   0  17  -3 7623.72 859.074   5
   0 -17   3 7481.54 941.470   2
   0  17   3 8684.34 764.276   5
   0 -17  -3 8058.93 857.068   2
  -1  17  -3 1421.39 507.841   5
   1 -17   3 1779.22 502.137   2
  -1 -17  -3 685.596 335.380   2
   1  17   3 1014.38 352.888   5
   2  17   3 30087.3 1547.35   5
   2 -17   3 34108.2 1980.49   2
  -2  17  -3 31039.4 1719.17   5
   3  17   3 16485.0 1149.19   5
   3 -17   3 16723.9 1397.69   2
   4 -17   3 21961.1 1638.99   2
   5 -17   3-43.0456 387.525   2
   6 -17   3 12050.6 1253.44   2
   7 -17   3 4083.80 790.260   2
   8 -17   3 54976.6 2805.83   2
   9 -17   3 1209.00 447.783   2
  10 -17   3 209.506 429.699   2
  11 -17   3 2011.85 699.476   2
  12 -17   3 43052.5 2634.45   2
  14 -18  -3 2414.77 723.163   2
  13 -18  -3 1428.93 501.745   2
  12 -18  -3 483.357 531.084   2
  11  18  -3 1143.31 501.099   5
  11 -18  -3 1414.59 554.113   2
  10  18  -3 9387.00 1064.51   5
  10 -18  -3 9896.01 1157.84   2
   9  18  -3 21368.1 1599.93   5
   9 -18  -3 20894.3 1587.37   2
   8  18  -3 459.690 341.735   5
   8 -18  -3 12.3756 398.958   2
   7 -18  -3 428.699 406.965   2
   7  18  -3 685.587 331.677   5
   6 -18  -3 81.1570 334.090   2
   6  18  -3 535.543 370.820   5
   5 -18  -3 6769.95 883.258   2
   5  18  -3 7466.63 887.843   5
   4 -18  -3 779.034 399.341   2
   4  18  -3 259.037 383.841   5
   3 -18  -3 5998.14 805.055   2
   3  18  -3 6091.40 810.897   5
   2  18  -3-367.720 412.314   5
   2 -18  -3-10.8744 312.120   2
   1 -18  -3-207.271 312.060   2
  -1 -18   3 235.745 398.966   2
   1  18  -3 288.586 338.731   5
   0 -18   3 12172.3 1234.25   2
   0  18  -3 15328.5 1227.90   5
   0 -18  -3 12079.7 1074.30   2
  -1 -18  -3 31953.9 1794.35   2
  -1  18  -3 33390.6 1838.67   5
   1 -18   3 30163.9 1927.62   2
   1  18   3 33499.8 1637.60   5
   2  18   3 3696.03 585.795   5
  -2  18  -3 2809.92 598.609   5
  -2 -18  -3 2632.59 528.563   2
   2 -18   3 3279.20 675.868   2
   3  18   3 10041.0 926.612   5
   3 -18   3 8430.64 1042.10   2
   4  18   3 572.381 292.019   5
   4 -18   3-389.388 474.997   2
   5 -18   3 4131.08 806.908   2
   6 -18   3 22629.8 1748.38   2
   7 -18   3 12394.4 1327.85   2
   8 -18   3 4910.62 891.432   2
   9 -18   3 1800.91 662.775   2
  10 -18   3 5480.51 973.593   2
  11 -18   3-346.532 575.020   2
  13 -19  -3-3.59762 433.819   2
  12  19  -3 3214.83 688.596   5
  12 -19  -3 4968.99 872.167   2
  11 -19  -3 1113.90 588.607   2
  11  19  -3 1503.15 560.755   5
  10 -19  -3 6543.30 962.806   2
  10  19  -3 8037.28 1041.01   5
   9  19  -3 4766.31 835.319   5
   9 -19  -3 4666.12 833.521   2
   8  19  -3 12650.6 1265.57   5
   8 -19  -3 14940.9 1387.43   2
   7 -19  -3 923.305 452.115   2
   7  19  -3-10.8885 376.170   5
   6 -19  -3 5235.78 806.298   2
   6  19  -3 3988.69 707.012   5
   5 -19  -3 30891.7 1886.68   2
   5  19  -3 31575.1 1881.60   5
   4 -19  -3 614.466 352.575   2
   4  19  -3-116.111 525.102   5
   3  19  -3 30630.7 1842.09   5
   3 -19  -3 34017.0 1924.53   2
   2  19  -3 4100.04 735.414   5
   2 -19  -3 4563.98 726.244   2
  -2 -19   3 5654.87 894.514   2
   1 -19  -3 6002.15 825.411   2
  -1 -19   3 6922.94 964.686   2
   1  19  -3 6819.36 882.954   5
   0  19  -3 50888.3 2405.15   5
   0 -19  -3 56590.7 2497.75   2
   0 -19   3 54607.1 2699.25   2
  -1  19  -3 1151.04 422.560   5
  -1 -19  -3 541.615 386.984   2
   1 -19   3 1461.71 606.499   2
  -2 -19  -3 3298.13 622.675   2
   2 -19   3 3340.60 765.816   2
   3 -19   3 22553.4 1731.42   2
   3  19   3 22081.3 1412.83   5
  -3 -19  -3 20475.5 1467.98   2
   4  19   3 28065.4 1652.95   5
   4 -19   3 24746.2 1820.56   2
   5  19   3 23948.2 1563.12   5
   5 -19   3 25286.9 1866.74   2
   6 -19   3 3505.51 813.578   2
   7 -19   3 14804.0 1476.00   2
   8 -19   3 16275.5 1586.84   2
   9 -19   3 34924.6 2342.24   2
  12 -20  -3 1581.99 569.295   2
  11  20  -3 596.801 462.538   5
  11 -20  -3 497.719 441.595   2
  10  20  -3 394.217 463.455   5
  10 -20  -3 366.737 417.432   2
   9  20  -3 26802.0 1895.85   5
   9 -20  -3 23860.0 1823.54   2
   8 -20  -3 2542.58 678.216   2
   8  20  -3 2676.21 707.595   5
   7  20  -3 6685.72 952.810   5
   7 -20  -3 5448.88 856.816   2
   6  20  -3 1308.81 533.207   5
   6 -20  -3 2195.43 635.085   2
   5  20  -3 10220.6 1097.52   5
   5 -20  -3 12087.5 1219.38   2
   4 -20  -3 14600.3 1310.35   2
   4  20  -3 15754.7 1335.38   5
   3 -20  -3 4381.79 769.188   2
   3  20  -3 4045.63 685.153   5
  -2 -20   3 23974.5 1809.88   2
   2 -20  -3 24758.0 1677.72   2
   2  20  -3 24077.6 1660.04   5
   1  20  -3 461.111 387.180   5
  -1 -20   3 1066.33 528.510   2
   1 -20  -3 782.439 451.913   2
   0  20  -3 19839.3 1489.67   5
   0 -20  -3 20340.3 1506.34   2
   0 -20   3 19626.1 1629.44   2
  -1  20  -3 3006.03 651.069   5
   1 -20   3 3149.75 698.475   2
  -1 -20  -3 2716.22 565.163   2
  -2 -20  -3 27955.6 1766.03   2
   2 -20   3 30160.6 2044.72   2
   3 -20   3 15089.5 1455.75   2
   4 -20   3 1824.03 618.228   2
   5 -20   3 6613.67 1027.80   2
   5  20   3 6187.60 838.669   5
   6  20   3 9183.60 1018.47   5
   6 -20   3 7925.69 1142.39   2
   7 -20   3 32077.8 2242.16   2
   8 -20   3 655.827 484.523   2
  11 -21  -3 14866.3 1516.39   2
  10 -21  -3 34155.8 2275.10   2
   9  21  -3 19119.3 1645.31   5
   9 -21  -3 20375.3 1809.03   2
   8 -21  -3 30000.4 2087.19   2
   8  21  -3 35414.4 2180.34   5
   7  21  -3 533.024 436.676   5
   7 -21  -3-113.801 476.478   2
   6 -21  -3 55303.8 2790.72   2
   6  21  -3 56337.9 2756.83   5
   5 -21  -3 2515.88 666.549   2
   5  21  -3 3768.87 747.102   5
   4 -21  -3-274.273 414.021   2
   4  21  -3-940.509 487.271   5
  -3 -21   3 17152.2 1566.73   2
   3  21  -3 20656.9 1574.52   5
   3 -21  -3 19307.3 1562.33   2
  -2 -21   3 617.859 450.812   2
   2  21  -3 437.707 379.504   5
   2 -21  -3 106.150 382.594   2
   1  21  -3 64683.8 2883.85   5
  -1 -21   3 62792.8 3094.76   2
   1 -21  -3 63762.5 2897.75   2
   0  21  -3 11403.9 1196.98   5
   0 -21  -3 10886.0 1172.04   2
   0 -21   3 11851.9 1330.97   2
   1 -21   3 3946.79 785.317   2
  -1  21  -3 3461.06 653.176   5
   2 -21   3 1163.70 547.070   2
   3 -21   3 5747.59 977.065   2
   4 -21   3 1840.14 557.348   2
   5 -21   3 15977.4 1565.98   2
   6 -21   3-745.423 580.936   2
   9 -22  -3 16968.9 1628.21   2
   8 -22  -3 882.815 605.616   2
   8  22  -3-580.748 450.924   5
   7 -22  -3 385.788 451.524   2
   7  22  -3 718.440 526.993   5
   6  22  -3 4677.32 860.239   5
   6 -22  -3 6674.97 1012.70   2
   5  22  -3 11409.4 1233.34   5
   5 -22  -3 11095.3 1247.92   2
   4 -22  -3 7777.80 1014.91   2
   4  22  -3 4849.99 803.599   5
  -4 -22   3 6534.57 1027.35   2
   3 -22  -3-547.632 482.770   2
  -3 -22   3 199.705 437.477   2
   3  22  -3 181.873 446.023   5
  -2 -22   3 3559.97 844.626   2
   2  22  -3 3418.46 737.690   5
   1  22  -3 666.362 444.133   5
  -1 -22   3 810.675 543.168   2
   0  22  -3 16101.2 1411.29   5
   0 -22   3 19305.5 1697.42   2
   1 -22   3 6942.90 1103.91   2
   2 -22   3 1416.49 510.845   2
   3 -22   3 763.211 466.129   2
   4 -22   3 4430.82 864.331   2
   7 -23  -3 4183.78 902.194   2
   6 -23  -3 22542.9 1843.85   2
   5  23  -3 899.853 523.737   5
  -4 -23   3-351.985 562.403   2
   4  23  -3 1178.50 577.434   5
   3  23  -3 22057.5 1729.80   5
  -3 -23   3 23240.4 1928.69   2
  -2 -23   3 2466.10 736.091   2
  -1 -23   3-75.7956 501.225   2
   0 -23   3 5461.85 1049.51   2
   1 -23   3-476.711 515.248   2
  23   0  -4 645.498 521.809   1
  22   0  -4 17879.7 1561.35   1
  21   0  -4 1525.24 466.717   1
 -21   0   4 577.263 467.872   4
 -20   0   4 16266.7 1443.30   4
  20   0  -4 17708.2 1476.41   1
 -19   0   4 3525.67 713.422   4
  19   0  -4 3183.09 641.293   1
 -18   0   4 21362.4 1539.96   4
  18   0  -4 23172.5 1567.49   1
 -17   0   4 99516.4 3483.63   4
 -16   0   4 1041.61 501.514   4
 -15   0   4 163361. 4526.17   4
 -14   0   4 174272. 4596.42   4
 -13   0   4 102042. 3103.59   4
 -12   0   4 148438. 3898.00   4
 -11   0   4 520.123 243.523   4
 -10   0   4 21680.1 1091.65   4
  -9   0   4 576137. 11012.5   4
  -8   0   4 7024.88 546.749   4
  -7   0   4 11941.3 647.717   4
  -6   0   4 5057.20 390.351   4
  -5   0   4 179913. 3641.60   4
  -4   0   4 191413. 3638.38   4
   4   0  -4 178322. 3766.54   1
   4   0  -4 188341. 3647.05   4
   4   0  -4 185242. 3603.70   5
   3   0  -4 38073.6 1077.07   1
  -3   0   4 38097.0 1000.25   5
   3   0  -4 39297.9 953.403   4
   3   0  -4 40531.4 1016.75   5
   2   0  -4 18471.8 623.996   1
  -2   0   4 18283.3 618.430   5
   2   0  -4 18257.7 485.081   4
  -2   0   4 18627.8 700.973   6
   2   0  -4 17677.4 629.120   5
  -2   0   4 19455.3 628.976   1
   1   0  -4 9167.01 476.517   3
  -1   0   4 8824.54 371.424   1
  -1   0   4 8446.54 464.775   3
  -1   0   4 9228.10 438.369   5
   1   0  -4 9904.17 486.394   6
  -1   0   4 9540.47 489.525   6
   0   0   4 214433. 4287.09   3
   1   0   4 129824. 2566.52   2
   1   0   4 128065. 2844.69   3
   2   0   4 1367.23 165.264   2
   2   0   4 1263.65 208.437   3
  -2   0  -4 1167.50 151.744   2
   3   0   4 62919.4 1778.18   3
   3   0   4 62576.5 1588.26   2
  -3   0  -4 66464.7 1605.65   2
   4   0   4 9239.68 601.031   3
   4   0   4 8482.88 495.027   2
   5   0   4 9240.58 560.062   2
   5   0   4 9430.78 644.582   3
  -6   0  -4 61640.8 1786.74   4
   6   0   4 65569.2 2001.11   3
   6   0   4 61599.7 1814.98   2
   7   0   4 236504. 5109.47   2
  -7   0  -4 231351. 5048.25   4
  -8   0  -4 54942.6 1813.93   4
   8   0   4 56927.9 2005.42   3
   8   0   4 54089.1 1828.03   2
  -9   0  -4 19350.7 1029.04   4
   9   0   4 19209.0 1140.38   3
   9   0   4 18780.0 1048.03   2
  10   0   4 14876.6 976.348   2
 -10   0  -4 15795.9 983.318   4
  10   0   4 16283.4 1093.72   3
  11   0   4 3565.37 522.915   2
 -11   0  -4 2606.40 433.456   4
  11   0   4 2908.50 502.034   3
  12   0   4 38256.5 1855.19   3
  12   0   4 35530.6 1683.05   2
 -12   0  -4 36003.1 1680.16   4
  13   0   4 3575.65 574.471   2
 -13   0  -4 4629.53 650.879   4
  14   0   4 23903.4 1473.21   2
 -14   0  -4 26113.2 1522.09   4
  15   0   4 6434.49 843.051   2
 -15   0  -4 6728.03 847.644   4
 -16   0  -4 62553.3 2677.74   4
 -17   0  -4 1200.91 518.269   4
 -18   0  -4 8867.36 1033.58   4
 -19   0  -4-452.739 481.069   4
  23   1  -4 13750.4 1430.03   1
  23  -1  -4 11283.2 1303.33   1
  22  -1  -4 933.594 486.852   1
 -22   1   4 1112.30 573.853   4
  22   1  -4 609.717 445.726   1
 -21   1   4 3649.56 780.618   4
  21   1  -4 2984.84 635.779   1
  21  -1  -4 3405.00 711.327   1
  20   1  -4 61.3142 427.741   1
 -20   1   4 618.894 437.639   4
  20  -1  -4 1148.49 413.684   1
  19  -1  -4 14229.8 1271.86   1
 -19  -1   4 14028.5 1287.24   4
 -19   1   4 15603.4 1352.44   4
  18  -1  -4 20681.2 1457.39   1
 -18  -1   4 21564.2 1529.49   4
 -18   1   4 19461.3 1450.14   4
 -17   1   4 17912.5 1350.01   4
 -17  -1   4 19400.1 1392.72   4
  17  -1  -4 19314.2 1365.53   1
 -16  -1   4 1166.92 439.308   4
 -16   1   4 782.832 442.863   4
  16  -1  -4 504.740 404.761   1
 -15   1   4 2365.21 529.167   4
 -15  -1   4 1625.15 481.678   4
  15  -1  -4 2606.86 510.396   1
 -14  -1   4 32023.8 1630.04   4
  14  -1  -4 37656.8 1742.26   1
 -14   1   4 33892.6 1677.05   4
 -13  -1   4 10955.1 899.635   4
 -13   1   4 10628.9 890.018   4
 -12   1   4 6416.73 652.578   4
 -12  -1   4 6714.24 663.844   4
  12  -1  -4 6214.17 649.829   2
 -11  -1   4 418.527 281.795   4
 -11   1   4 326.303 223.189   4
  11  -1  -4 58.2711 217.017   2
 -10   1   4 163648. 4040.70   4
  10  -1  -4 174967. 4100.84   2
 -10  -1   4 171162. 4048.79   4
   9  -1  -4 17914.4 921.104   2
  -9   1   4 16154.7 900.132   4
  -9  -1   4 16772.2 889.281   4
   8  -1  -4 95353.1 2437.68   2
  -8   1   4 93936.8 2460.24   4
  -8  -1   4 89199.5 2409.55   4
   8  -1  -4 90040.8 2456.84   1
   7  -1  -4 1092.74 264.091   1
   7  -1  -4 1521.66 249.916   2
  -7   1   4 1780.57 273.689   4
  -7  -1   4 1409.92 251.227   4
  -6  -1   4 102303. 2411.41   4
   6  -1  -4 103932. 2427.74   2
  -6   1   4 103759. 2412.14   4
   6  -1  -4 104419. 2531.41   1
  -5   1   4 35013.2 1045.46   4
   5  -1  -4 32789.8 1113.76   1
  -4   1   4 30652.6 863.684   4
   4  -1  -4 29729.4 980.445   1
   4  -1  -4 28000.3 759.279   5
  -4   1   4 30062.7 884.886   2
   4   1  -4 29630.4 902.958   5
   4   1  -4 29587.0 876.540   4
  -3   1   4 1913.36 159.128   5
   3  -1  -4 1938.96 226.815   1
  -3   1   4 2002.60 170.633   2
   3   1  -4 2032.91 180.232   4
  -3   1   4 1878.91 161.397   4
   3   1  -4 1904.12 214.576   5
   3  -1  -4 1667.99 154.041   5
  -3   1   4 1566.54 200.973   1
  -2   1   4 27400.6 826.812   1
  -2  -1   4 26678.9 871.485   6
  -2   1   4 26434.4 607.745   4
  -2   1   4 26500.8 731.895   5
  -2  -1   4 27017.6 835.263   5
  -2   1   4 25248.0 839.454   3
   2   1  -4 26005.7 850.998   5
  -2   1   4 26340.0 870.245   6
   1  -1  -4 358251. 6492.32   3
   1   1  -4 355363. 6495.03   6
  -1  -1   4 344436. 6477.24   6
   1   1  -4 336883. 6192.10   1
  -1  -1   4 339926. 6506.80   3
  -1  -1   4 339107. 6464.65   5
  -1   1   4 337732. 6470.67   3
   1  -1  -4 355796. 6494.57   6
  -1   1   4 339144. 6474.88   6
   0  -1   4 11784.0 570.413   3
   0  -1  -4 11782.2 561.205   3
   1   1   4 3750.99 319.100   3
   1  -1   4 2906.35 239.070   2
   1   1   4 3313.56 182.156   2
  -1  -1  -4 2831.42 155.173   4
  -1  -1  -4 3176.78 180.997   2
   1  -1   4 4033.01 336.521   3
   2  -1   4 2265.24 229.442   2
  -2   1  -4 2362.90 232.742   2
   2  -1   4 1836.97 250.259   3
   2   1   4 2235.06 186.331   2
  -2  -1  -4 2012.65 175.430   2
   2   1   4 1999.50 266.190   3
  -2  -1  -4 1823.31 162.044   4
   3   1   4 54872.4 1636.72   3
   3  -1   4 55221.1 1613.11   3
   3  -1   4 54245.8 1485.42   2
  -3  -1  -4 57393.0 1405.09   2
   3   1   4 58939.4 1395.97   2
  -3  -1  -4 53715.4 1345.75   4
   4  -1   4 52892.9 1550.84   2
   4   1   4 56571.3 1463.21   2
   4  -1   4 56322.3 1686.70   3
   4   1   4 54388.7 1687.03   3
  -4  -1  -4 54016.8 1433.91   4
   5   1   4 20317.5 970.732   3
   5  -1   4 19604.7 927.754   3
   5   1   4 19762.4 808.455   2
  -5  -1  -4 19380.7 798.589   4
   5  -1   4 18930.3 863.456   2
   6   1   4 44369.1 1608.38   3
   6  -1   4 46290.0 1529.61   2
  -6  -1  -4 43517.4 1398.93   4
   6  -1   4 44889.5 1591.62   3
   6   1   4 43042.4 1406.39   2
   7   1   4 5580.26 567.959   3
   7   1   4 6027.43 518.255   2
   7  -1   4 5254.96 538.330   3
   7  -1   4 4730.60 484.856   2
  -7  -1  -4 6246.89 518.099   4
   8  -1   4 90529.6 2658.55   3
   8   1   4 85668.0 2450.25   2
   8   1   4 91991.8 2721.43   3
  -8  -1  -4 89305.9 2474.73   4
   8  -1   4 88872.0 2569.47   2
   9   1   4 17578.3 1096.35   3
   9   1   4 18830.6 1012.36   2
  -9  -1  -4 17626.9 979.136   4
   9  -1   4 18162.9 1081.37   3
  -9   1  -4 17520.2 1005.56   4
   9  -1   4 17088.9 1013.74   2
 -10  -1  -4 16869.1 998.463   4
  10  -1   4 18124.4 1138.09   3
 -10   1  -4 15291.0 993.443   4
  10  -1   4 17302.7 1061.18   2
  10   1   4 17523.9 1123.63   3
  10   1   4 17513.7 1020.59   2
 -11   1  -4 10220.9 849.446   4
 -11  -1  -4 9240.48 782.097   4
  11  -1   4 10971.0 882.293   2
  11   1   4 10188.7 914.873   3
  11   1   4 10193.1 822.906   2
  11  -1   4 10002.9 879.517   3
  12   1   4 1637.88 436.380   3
  12   1   4 2086.83 416.286   2
 -12   1  -4 2185.09 461.710   4
  12  -1   4 1771.31 440.007   2
 -12  -1  -4 2268.12 435.078   4
  12  -1   4 2622.99 495.611   3
  13  -1   4 2360.33 491.867   3
  13  -1   4 2400.64 479.911   2
  13   1   4 1842.69 467.331   2
 -13   1  -4 2918.64 533.313   4
 -13  -1  -4 2927.89 501.026   4
  14  -1   4 269.039 297.952   2
 -14  -1  -4 530.810 335.702   4
 -14   1  -4 465.429 343.185   4
 -15   1  -4 43512.4 2117.60   4
 -15  -1  -4 43706.4 2098.86   4
  15  -1   4 44942.4 2169.56   2
 -16  -1  -4 5120.05 762.680   4
  16  -1   4 6526.66 884.521   2
 -16   1  -4 5522.05 827.814   4
 -17   1  -4 8615.61 1002.56   4
 -17  -1  -4 9017.17 1024.41   4
  17  -1   4 7435.00 945.336   2
 -18   1  -4 303.256 383.971   4
 -19   1  -4 10667.9 1214.66   4
 -20   1  -4 6505.44 1013.28   4
  23   2  -4 6761.19 1016.10   1
  23  -2  -4 6197.33 947.622   1
  22  -2  -4 3107.51 718.169   1
 -22   2   4 3402.88 778.712   4
  22   2  -4 3015.08 720.496   1
  21  -2  -4 591.420 473.535   1
 -21   2   4 254.643 412.342   4
  20  -2  -4 13931.6 1286.86   1
 -20   2   4 13567.5 1326.34   4
  19  -2  -4 697.620 368.091   1
 -19   2   4 1050.71 479.708   4
  18  -2  -4 10764.5 1033.89   1
 -18   2   4 9175.33 1018.22   4
 -17   2   4 6986.18 856.738   4
  17  -2  -4 8057.15 872.550   1
 -16   2   4 8554.12 931.842   4
  16  -2  -4 6055.72 794.508   1
  15  -2  -4 18095.7 1224.73   1
 -15   2   4 17924.2 1254.58   4
 -15  -2   4 18343.3 1247.64   4
  15  -2  -4 19332.0 1290.48   2
  14  -2  -4 7320.03 748.014   1
 -14  -2   4 7454.10 775.234   4
  14  -2  -4 7243.86 767.910   2
 -14   2   4 7475.43 772.685   4
  13  -2  -4 5241.71 629.759   1
  13  -2  -4 4798.13 599.777   2
 -13   2   4 5122.12 620.968   4
 -13  -2   4 4919.74 617.108   4
  12  -2  -4 41703.7 1720.51   2
 -12   2   4 40944.3 1733.99   4
 -12  -2   4 40607.2 1695.74   4
  12  -2  -4 43258.3 1746.96   1
  11  -2  -4 80365.2 2493.24   2
 -11   2   4 81076.1 2498.34   4
  11  -2  -4 79617.4 2497.27   1
 -11  -2   4 83335.0 2509.58   4
 -10  -2   4 1851.54 345.226   4
 -10   2   4 572.960 214.858   4
  10  -2  -4 1749.90 359.861   1
  10  -2  -4 1286.17 316.654   2
   9  -2  -4 75549.1 2200.93   2
  -9  -2   4 75326.7 2203.24   4
   9  -2  -4 75485.2 2250.29   1
   8  -2  -4 16735.6 889.999   1
   8  -2  -4 16058.0 830.104   2
   7  -2  -4 12649.1 731.218   1
   7  -2  -4 14098.1 718.076   2
   6  -2  -4 251213. 4839.98   2
   6  -2  -4 224235. 4906.53   1
   5  -2  -4 56302.7 1478.51   2
   5  -2  -4 57782.9 1620.25   1
   4  -2  -4 70204.6 1428.79   5
   4  -2  -4 70410.3 1643.24   2
   4   2  -4 71813.3 1764.25   5
  -4   2   4 73717.4 1683.40   2
   4  -2  -4 73713.6 1848.43   1
  -3   2   4 27489.2 666.171   5
   3   2  -4 29168.4 940.190   5
  -3   2   4 30450.5 809.740   2
   3  -2  -4 30224.5 783.425   2
  -2   2   4 571213. 10347.7   6
  -2  -2   4 549182. 10322.1   6
   2   2  -4 562430. 10380.7   5
  -2  -2   4 562031. 10366.3   5
  -2   2   4 574138. 10283.8   3
  -2   2   4 570847. 10044.8   5
  -2   2   4 590762. 10005.4   2
  -2   2   4 534584. 10340.9   1
  -1   2   4 36993.8 1086.48   3
   1   2  -4 39735.2 1115.94   6
  -1  -2   4 35553.9 1135.85   3
   1  -2  -4 35987.3 1084.86   6
   1  -2  -4 40824.5 1113.57   3
  -1  -2   4 37833.0 1107.39   6
  -1   2   4 40131.6 1123.21   6
   1   2  -4 36983.5 1152.13   5
   0   2   4 21708.7 793.943   3
   0  -2   4 23054.6 831.797   3
   1  -2   4 104573. 2431.76   3
   1   2   4 108066. 2448.04   3
   1   2   4 102843. 1967.59   2
   1  -2   4 103546. 2345.56   2
   1   2   4 108336. 2038.14   4
  -1  -2  -4 106731. 1982.26   2
   2  -2   4 33562.3 1149.28   3
   2   2   4 35479.0 871.778   2
   2  -2   4 35716.7 1121.72   2
  -2  -2  -4 37740.7 897.824   2
   2   2   4 37498.5 1207.12   3
   3  -2   4 326318. 6462.10   2
  -3  -2  -4 342830. 6180.06   2
   3   2   4 330869. 6140.20   2
   3   2   4 337621. 6597.22   3
   3  -2   4 321643. 6504.94   3
   4   2   4 22417.5 984.756   3
  -4  -2  -4 23033.8 793.176   2
   4  -2   4 19630.9 908.570   3
   4  -2   4 20419.7 889.000   2
  -4  -2  -4 20381.6 761.703   4
   4   2   4 21707.1 764.574   2
   5   2   4 5955.42 421.881   2
  -5  -2  -4 5869.85 424.197   4
   5   2   4 5566.95 516.775   3
   5  -2   4 5428.18 482.007   2
   5  -2   4 5306.40 473.092   3
   6  -2   4 394892. 7950.38   2
   6  -2   4 394726. 7974.39   3
   6   2   4 399129. 8104.67   3
  -6  -2  -4 399349. 7713.54   4
   6   2   4 407648. 7708.70   2
   7   2   4 27735.1 1303.54   3
   7   2   4 31207.3 1181.98   2
   7  -2   4 30625.1 1308.92   2
   7  -2   4 31111.9 1309.11   3
  -7  -2  -4 28742.3 1154.37   4
   8   2   4 60365.1 1888.60   2
  -8  -2  -4 61722.8 1909.65   4
   8  -2   4 59064.9 2030.81   3
   8  -2   4 58173.4 2018.24   2
   8   2   4 60508.7 2119.95   3
   9   2   4 95241.4 2691.95   2
   9   2   4 93762.7 2948.98   3
   9  -2   4 96434.3 2860.15   2
  -9  -2  -4 96297.1 2700.57   4
   9  -2   4 101465. 2922.10   3
  10  -2   4 1163.32 324.492   2
  10  -2   4 1258.29 375.844   3
  10   2   4 782.082 348.747   3
  10   2   4 1176.35 306.831   2
 -10  -2  -4 1128.66 335.336   4
  11  -2   4 68348.6 2459.45   2
 -11  -2  -4 67128.8 2313.78   4
 -11   2  -4 67843.1 2394.53   4
  11  -2   4 67956.1 2462.51   3
  11   2   4 69333.4 2569.41   3
  12  -2   4 776.098 311.543   2
  12   2   4 393.071 359.666   3
 -12   2  -4 1176.61 356.985   4
  12  -2   4 1361.00 390.646   3
 -12  -2  -4 1743.91 438.307   4
  12  -2   4 1104.28 242.682   1
  13  -2   4 340.871 215.309   1
  13  -2   4 512.678 330.745   2
  13  -2   4 288.163 276.607   3
 -13   2  -4 701.195 368.193   4
 -13  -2  -4 222.066 306.162   4
 -14   2  -4 17269.9 1270.61   4
  14  -2   4 18028.1 1308.84   2
 -14  -2  -4 19429.2 1302.23   4
  15  -2   4 3864.73 646.882   2
 -15   2  -4 4337.71 723.185   4
 -15  -2  -4 3666.61 601.174   4
  16  -2   4 5162.80 771.367   2
 -16   2  -4 4556.28 726.835   4
 -17   2  -4 7017.87 932.669   4
  17  -2   4 5440.06 835.235   2
  18  -2   4 3589.86 716.200   2
 -18   2  -4 4745.12 801.417   4
 -19   2  -4 203.270 452.697   4
 -20   2  -4 3814.20 761.009   4
  23  -3  -4 16841.1 1541.65   1
  22  -3  -4 3378.98 727.015   1
  21  -3  -4 5230.88 829.424   1
 -21   3   4 7264.56 1087.92   4
 -20   3   4 2793.53 693.541   4
  20  -3  -4 3519.19 730.148   1
 -19   3   4-100.377 489.929   4
  19  -3  -4 927.794 413.943   1
  18  -3  -4 10638.8 1050.07   1
 -18   3   4 10331.7 1067.36   4
  17  -3  -4 15509.1 1211.86   1
  17  -3  -4 13904.8 1199.44   2
 -17   3   4 11986.6 1122.21   4
  16  -3  -4 7488.70 848.750   2
 -16   3   4 7848.35 892.339   4
  16  -3  -4 7755.18 825.760   1
 -15   3   4 11.0701 352.464   4
  15  -3  -4-257.816 344.073   1
  15  -3  -4 375.813 334.126   2
  14  -3  -4 19950.5 1265.02   2
  14  -3  -4 17432.5 1162.34   1
 -14   3   4 18627.3 1227.93   4
  13  -3  -4 1258.93 309.369   1
  13  -3  -4 840.583 323.003   2
 -13   3   4 1110.73 365.847   4
  12  -3  -4 2424.28 414.173   1
  12  -3  -4 2000.35 413.462   2
 -12   3   4 2230.83 428.529   4
  11  -3  -4 8928.32 737.253   1
  11  -3  -4 8634.65 736.633   2
  10  -3  -4 335.118 219.781   2
  10  -3  -4 255.319 196.999   1
   9  -3  -4 994.109 239.259   1
   9  -3  -4 1144.59 263.228   2
   8  -3  -4 94319.8 2580.25   1
   8  -3  -4 97382.1 2547.84   2
   7  -3  -4 60625.7 1892.63   1
   7  -3  -4 67262.7 1857.01   2
   6  -3  -4 150201. 3396.58   1
   6  -3  -4 145928. 3250.58   2
   5  -3  -4 61490.2 1753.35   1
   5  -3  -4 63310.7 1619.59   2
  -4   3   4 31072.1 946.717   2
   4   3  -4 30645.3 1035.97   5
   4  -3  -4 30863.4 921.782   2
   3  -3  -4 345720. 6132.45   2
  -3   3   4 341375. 6167.16   2
   3   3  -4 340934. 6447.73   5
  -2  -3   4 41182.7 1146.13   6
  -2   3   4 40964.0 1149.28   6
   2  -3  -4 40074.5 914.222   2
   2  -3  -4 42394.3 1115.62   3
  -2   3   4 42704.5 946.253   2
   2   3  -4 39748.8 1236.37   5
  -1  -3   4 166677. 3413.76   6
   1  -3  -4 171394. 3396.66   3
   1  -3  -4 167099. 3413.65   6
   1   3  -4 157015. 3545.20   5
  -1   3   4 162919. 3378.03   3
   1   3  -4 169492. 3418.66   6
  -1   3   4 172750. 3444.30   6
   0   3   4 206094. 4075.88   3
   0  -3   4 197309. 4099.02   3
   1  -3   4 12386.9 623.682   2
   1  -3   4 12407.4 601.043   3
   1   3   4 12880.5 615.096   3
   2  -3   4 19564.6 822.568   3
  -2  -3  -4 20929.2 587.553   2
   2  -3   4 21322.8 859.654   2
   2   3   4 21182.1 881.563   3
   2   3   4 20878.1 653.014   4
   3  -3   4 923.579 194.150   2
   3  -3   4 521.287 178.573   3
   3   3   4 520.499 122.309   4
   3   3   4 544.822 200.582   3
   4  -3   4 508.149 169.800   3
   4  -3   4 81.5285 169.590   2
   4   3   4 256.893 161.304   3
   5  -3   4 85759.4 2329.29   3
   5  -3   4 85000.8 2378.56   2
   5   3   4 86212.6 2456.26   3
   5  -3   4 90335.0 1849.44   1
   6  -3   4 5469.36 551.077   2
   6  -3   4 6402.71 349.243   1
   6  -3   4 5692.69 515.240   3
   6   3   4 6838.87 587.902   3
   7  -3   4 1875.91 348.610   2
   7  -3   4 2325.87 238.561   1
   7   3   4 1829.81 345.260   3
   8  -3   4 834.153 264.614   3
   8  -3   4 877.880 295.220   2
   8   3   4 1056.89 325.569   3
   8  -3   4 1025.47 192.593   1
   9  -3   4 12634.0 659.908   1
   9  -3   4 11673.8 882.520   2
   9  -3   4 13018.8 892.458   3
   9   3   4 12856.1 944.738   3
  10  -3   4 6624.56 505.142   1
  10  -3   4 6091.87 674.224   2
  10   3   4 6817.97 723.807   3
  10  -3   4 5145.98 599.141   3
  11   3   4 769.530 351.307   3
  11  -3   4 989.280 239.419   1
  11  -3   4 472.607 292.793   3
  11  -3   4 1185.97 372.969   2
  12  -3   4 1297.54 268.189   1
  12  -3   4 1377.79 366.573   2
  12  -3   4 1268.44 382.888   3
  13  -3   4 5491.72 731.844   2
  13  -3   4 5142.38 524.853   1
  13  -3   4 4748.43 666.096   3
 -13   3  -4 3683.18 627.859   4
  14  -3   4 9797.79 986.846   2
 -14   3  -4 9882.72 981.270   4
  15  -3   4 35413.7 1971.72   2
 -15   3  -4 37767.5 1985.61   4
  16  -3   4 5620.25 805.454   2
 -16   3  -4 6509.36 865.802   4
  17  -3   4 4841.12 783.193   2
 -17   3  -4 3761.34 756.496   4
  18  -3   4 4101.60 761.308   2
 -18   3  -4 5582.92 883.513   4
 -19   3  -4-594.938 616.517   4
  19  -3   4-2115.54 616.051   2
  23  -4  -4 209.618 446.272   1
  22  -4  -4 15162.5 1396.70   1
  21  -4  -4 3587.30 705.407   1
 -21   4   4 3986.48 804.258   4
 -20   4   4 4301.69 834.057   4
  20  -4  -4 4764.07 782.248   1
 -19   4   4 311.626 445.830   4
  19  -4  -4-190.470 447.265   2
  19  -4  -4 180.554 426.809   1
  18  -4  -4 19456.0 1420.66   1
  18  -4  -4 18897.9 1459.44   2
 -18   4   4 19941.1 1515.61   4
  17  -4  -4 3908.21 640.984   1
 -17   4   4 4288.39 702.205   4
  17  -4  -4 4007.41 668.942   2
  16  -4  -4 8720.95 878.442   1
  16  -4  -4 8192.62 909.151   2
 -16   4   4 9301.64 942.687   4
  15  -4  -4 658.390 318.004   2
  15  -4  -4 710.281 259.662   1
 -15   4   4 632.928 375.654   4
  14  -4  -4 123.285 389.022   2
 -14   4   4-306.223 354.036   4
  14  -4  -4 97.2466 271.377   1
  13  -4  -4 8442.79 803.194   2
  13  -4  -4 8107.37 766.426   1
  12  -4  -4 66829.0 2357.88   2
  12  -4  -4 69850.6 2365.72   1
  11  -4  -4 18622.6 1086.15   2
  11  -4  -4 18468.3 1097.48   1
  10  -4  -4 6343.91 601.396   1
  10  -4  -4 7921.44 667.948   2
   9  -4  -4 362.355 200.510   2
   9  -4  -4 366.021 197.569   1
   8  -4  -4 11895.3 761.521   1
   8  -4  -4 10949.6 705.647   2
   7  -4  -4 5053.42 475.054   1
   7  -4  -4 3690.56 394.684   2
   6  -4  -4 165824. 3627.03   2
   5  -4  -4 1721.57 236.577   2
   4   4  -4 9461.31 568.252   5
  -4   4   4 9600.39 432.205   3
   4  -4  -4 9867.29 488.284   2
  -4   4   4 9704.28 496.651   2
   3  -4  -4 2230.24 205.924   2
  -3   4   4 1895.52 194.154   3
  -3   4   4 2044.87 203.755   2
   2  -4  -4 263373. 4798.59   2
  -2   4   4 252957. 5011.49   6
  -2  -4   4 257223. 5015.25   6
   2  -4  -4 248586. 4943.51   3
  -2   4   4 257531. 4937.53   3
   2   4  -4 253717. 5237.28   5
   1  -4  -4 59887.3 1269.37   2
   1   4  -4 64098.8 1555.11   6
  -1   4   4 58744.2 1551.36   6
  -1   4   4 59919.6 1518.96   3
   1   4  -4 61737.6 1746.61   5
   1  -4  -4 65275.0 1564.06   6
  -1  -4   4 62742.2 1553.53   6
   1  -4  -4 63819.4 1541.18   3
   0  -4  -4 2077.39 127.851   2
   0   4   4 2377.62 255.034   3
   0   4  -4 2262.91 312.374   5
   1   4   4 8179.44 500.985   3
   1  -4   4 8396.29 543.049   2
   1  -4   4 9363.29 524.845   3
   2  -4   4 172582. 3608.93   3
  -2   4  -4 163925. 3031.79   1
  -2  -4  -4 170112. 3174.58   2
   2  -4   4 166806. 3698.39   2
   2   4   4 168857. 3645.53   3
   3  -4   4 271386. 5487.97   3
   3   4   4 267416. 5582.27   3
   3  -4   4 274822. 5652.05   2
  -3  -4  -4 276726. 5124.39   2
   4  -4   4 78192.8 2079.84   3
  -4  -4  -4 79463.4 1834.48   2
   4   4   4 74829.4 2168.89   3
   4  -4   4 74626.8 2184.13   2
   5  -4   4 5685.25 471.046   3
   5  -4   4 5811.24 550.548   2
   5   4   4 6061.20 552.997   3
   6  -4   4 48782.4 1634.59   3
   6  -4   4 46097.9 1714.84   2
   6   4   4 49183.7 1768.08   3
   7  -4   4 99215.8 2708.08   3
   7  -4   4 94835.6 2811.28   2
   7   4   4 92069.1 2813.69   3
   8  -4   4 423.794 268.017   2
   8  -4   4 835.656 179.024   1
   8   4   4 388.898 239.802   3
   8  -4   4 736.601 267.222   3
   9  -4   4 55599.6 1994.12   3
   9   4   4 56163.6 2158.76   3
   9  -4   4 59079.4 1633.72   1
   9  -4   4 53174.2 2082.21   2
  10  -4   4 219.079 175.514   1
  10   4   4 163.605 329.261   3
  10  -4   4 558.954 300.226   3
  10  -4   4 521.793 316.358   2
  11  -4   4 79440.5 2180.52   1
  11  -4   4 71158.6 2662.66   2
  11  -4   4 77359.4 2618.56   3
  12  -4   4 6451.46 783.610   2
  12  -4   4 6769.98 575.885   1
  12  -4   4 5298.20 680.953   3
  13  -4   4 23744.7 1512.30   2
  13  -4   4 27406.7 1535.32   3
 -14   4  -4 277.792 394.408   4
  14  -4   4 522.790 305.825   2
  15  -4   4 8586.29 973.502   2
 -15   4  -4 8404.66 977.708   4
  16  -4   4 11110.9 1130.79   2
 -16   4  -4 10440.9 1085.51   4
 -17   4  -4 5772.26 886.474   4
  17  -4   4 5910.35 828.724   2
  18  -4   4 1869.43 564.000   2
 -18   4  -4 2957.22 685.638   4
  19  -4   4 1069.32 454.210   2
 -19   4  -4 1435.18 541.120   4
  22  -5  -4 1005.65 566.958   1
  21  -5  -4 58466.9 2794.18   1
 -21   5   4 54387.6 2869.54   4
  20  -5  -4 9013.91 1057.97   1
 -20   5   4 8324.33 1041.92   4
  20  -5  -4 8068.95 1062.50   2
 -19   5   4 24394.5 1737.96   4
  19  -5  -4 27133.9 1728.26   1
  19  -5  -4 22114.5 1695.58   2
 -18   5   4 3607.98 706.951   4
  18  -5  -4 2483.07 549.047   1
  18  -5  -4 2154.11 544.940   2
  17  -5  -4 6423.55 851.048   2
 -17   5   4 6051.10 812.480   4
  17  -5  -4 7141.39 851.695   1
  16  -5  -4-64.6449 331.883   2
 -16   5   4-131.277 428.477   4
  16  -5  -4 110.926 348.409   1
  15  -5  -4 1080.87 343.470   1
  15  -5  -4 1740.57 435.001   2
  14  -5  -4 70146.4 2529.68   1
  14  -5  -4 64239.2 2527.64   2
  13  -5  -4 7412.37 740.250   1
  13  -5  -4 4995.35 670.730   2
  12  -5  -4 958.160 312.295   1
  12  -5  -4 326.416 326.210   2
  11  -5  -4 36918.7 1604.08   1
  11  -5  -4 39022.4 1651.97   2
  10  -5  -4 144705. 3702.51   1
  10  -5  -4 138698. 3641.83   2
   9  -5  -4 6927.55 602.811   2
   9  -5  -4 5928.39 576.304   1
   8  -5  -4 4113.39 442.342   2
   7  -5  -4 23188.2 1017.38   2
   6  -5  -4 16161.7 783.428   2
   5  -5  -4 469856. 8842.82   2
   4  -5  -4 20028.8 776.728   2
   4   5  -4 19814.9 898.691   5
  -4   5   4 20102.3 648.676   3
  -3   5   4 225457. 4555.12   6
   3  -5  -4 232371. 4515.13   2
  -3   5   4 244592. 4557.50   2
  -3   5   4 230218. 4400.58   3
   3   5  -4 228655. 4832.39   5
   2  -5  -4 49742.4 1301.25   3
  -2   5   4 54645.9 1396.09   6
   2  -5  -4 53849.1 1283.31   2
   2   5  -4 51616.1 1585.91   5
  -2   5   4 52684.5 1302.85   3
  -2  -5   4 52052.3 1366.25   6
  -1  -5   4 116716. 2573.14   6
   1   5  -4 112434. 2852.49   5
   1  -5  -4 120695. 2397.74   2
  -1   5   4 120312. 2567.21   3
  -1   5   4 117464. 2583.46   6
   1  -5  -4 125400. 2589.20   6
   1   5  -4 121211. 2584.71   6
   1  -5  -4 120612. 2578.53   3
   0   5  -4 278382. 5799.43   5
   0   5   4 288444. 5508.58   3
   0  -5   4 281850. 5573.22   3
   1   5   4 15331.7 703.597   3
   1  -5   4 17343.9 741.300   3
   1  -5   4 15746.6 803.332   2
   2   5   4 223851. 4678.47   3
   2  -5   4 224467. 4601.24   3
   2  -5   4 226722. 4831.34   2
   3  -5   4 439425. 8388.22   3
  -3   5  -4 435112. 7869.88   1
  -3  -5  -4 449202. 8040.17   2
   3   5   4 448461. 8561.28   3
   3  -5   4 438735. 8668.69   2
   4  -5   4 185328. 4020.70   3
  -4  -5  -4 186952. 3729.86   2
   4   5   4 186178. 4205.12   3
   4  -5   4 178665. 4230.91   2
   5  -5   4 32567.1 1368.48   2
   5  -5   4 30031.3 1166.29   3
   5   5   4 29124.4 1272.15   3
   6  -5   4 68511.5 2217.05   2
   6  -5   4 69588.9 2036.54   3
   6   5   4 66806.5 2182.42   3
   7  -5   4 37934.2 1624.89   2
   7  -5   4 38856.7 1469.35   3
   7   5   4 39855.8 1649.66   3
   8  -5   4 154514. 4091.55   2
   8  -5   4 157417. 3835.24   3
   8   5   4 156927. 4102.03   3
   9  -5   4 30906.7 1397.31   3
   9   5   4 32048.3 1575.30   3
   9  -5   4 29770.5 1532.85   2
  10   5   4 534.517 321.718   3
  10  -5   4 968.717 284.885   3
  10  -5   4 369.139 256.723   2
  11  -5   4 35902.5 1805.06   2
  11  -5   4 38213.7 1352.09   1
  11  -5   4 34639.8 1630.30   3
  12  -5   4 184684. 4736.17   3
  12  -5   4 174416. 4909.38   2
  13  -5   4 64.9368 387.042   2
  13  -5   4-99.7100 299.522   3
  14  -5   4 10483.5 1051.05   2
 -15   5  -4 336.535 362.624   4
  15  -5   4 388.735 323.735   2
  16  -5   4 1519.04 581.021   2
 -16   5  -4 917.558 433.699   4
  17  -5   4 38287.3 2220.30   2
 -17   5  -4 35788.4 2148.76   4
 -18   5  -4 6887.99 1002.02   4
  18  -5   4 7133.80 978.284   2
 -19   5  -4 35834.7 2284.98   4
  21  -6  -4 9357.08 1102.52   1
 -21   6   4 7909.51 1080.56   4
  21  -6  -4 10331.5 1223.25   2
  20  -6  -4 6013.40 849.186   1
  20  -6  -4 4750.88 857.321   2
 -20   6   4 5297.11 898.460   4
  19  -6  -4 10731.3 1090.54   1
 -19   6   4 8562.58 1095.58   4
  19  -6  -4 9577.52 1107.22   2
 -18   6   4 40712.8 2259.70   4
  18  -6  -4 48367.8 2415.05   2
  18  -6  -4 44961.0 2205.29   1
  17  -6  -4 15773.1 1316.37   2
 -17   6   4 14400.3 1276.08   4
  17  -6  -4 16080.6 1257.14   1
  16  -6  -4 11412.5 1079.63   2
  16  -6  -4 10885.3 1008.01   1
  15  -6  -4 10191.8 1001.27   2
  15  -6  -4 8870.68 878.172   1
  14  -6  -4 9546.14 885.147   1
  14  -6  -4 8798.26 887.888   2
  13  -6  -4 95213.0 3019.26   1
  13  -6  -4 91634.8 3045.28   2
  12  -6  -4 13966.0 1005.67   1
  12  -6  -4 12204.9 971.557   2
  11  -6  -4 29973.8 1454.12   2
  10  -6  -4 2935.60 434.204   2
   9  -6  -4 124171. 3290.41   2
   8  -6  -4 48038.0 1698.88   2
   7  -6  -4 4537.25 475.161   2
   7  -6  -4 4982.97 276.712   5
   6  -6  -4 25643.4 1062.75   2
   6  -6  -4 24079.9 611.296   5
   5  -6  -4 52966.5 1568.66   2
  -5   6   4 51436.7 1200.24   3
  -4   6   4 165460. 3142.75   3
   4  -6  -4 161173. 3478.88   2
   4   6  -4 157364. 3715.77   5
  -3  -6   4 2861.31 264.389   6
  -3   6   4 2938.93 269.148   6
  -3   6   4 2893.25 161.024   5
   3  -6  -4 2601.34 269.150   2
  -3   6   4 2766.56 210.430   3
   3   6  -4 2822.50 373.010   5
  -2   6   4 67705.4 1570.50   3
  -2  -6   4 68742.8 1648.34   6
   2   6  -4 70261.8 1966.30   5
   2  -6  -4 66741.3 1574.55   3
   2  -6  -4 70312.1 1647.39   2
  -1   6   4 20767.2 738.360   3
   1  -6  -4 19724.0 715.540   6
   1   6  -4 19126.3 926.746   5
   1  -6  -4 21248.3 751.403   3
   1  -6  -4 19567.2 685.006   2
   0   6   4 32844.9 1054.46   3
   0   6  -4 33426.2 1291.35   5
   0  -6   4 33887.9 1128.91   3
   1  -6   4 347.469 180.593   2
   1   6   4-21.4981 123.425   3
  -1   6  -4 17.3548 203.704   5
   1  -6   4-10.9800 114.846   3
   2  -6   4 16099.7 738.154   3
   2   6   4 17044.1 797.797   3
   2  -6   4 14805.5 862.136   2
   3  -6   4 32801.8 1138.32   3
  -3   6  -4 31111.6 876.712   1
   3  -6   4 32765.2 1351.74   2
   3   6   4 32398.6 1227.95   3
  -4   6  -4 25152.6 748.516   1
   4  -6   4 22979.9 967.325   3
   4   6   4 22694.8 1073.23   3
   4  -6   4 24371.1 1169.35   2
   5  -6   4 1733.06 290.512   3
   5  -6   4 1857.23 356.632   2
   5   6   4 1577.13 317.690   3
   6  -6   4 1561.87 370.105   2
   6  -6   4 2134.02 320.558   3
   6   6   4 1850.56 351.487   3
   7  -6   4 23877.5 1288.07   2
   7   6   4 24992.8 1277.00   3
   7  -6   4 24948.0 1126.22   3
   8  -6   4 19682.0 1038.33   3
   8  -6   4 18771.2 1186.40   2
   8   6   4 20982.0 1217.86   3
   9  -6   4 1495.61 327.631   3
   9  -6   4 1400.45 400.443   2
   9   6   4 1763.69 428.335   3
  10  -6   4 12386.3 882.031   3
  10  -6   4 11546.7 1000.59   2
  11  -6   4 63302.8 2253.43   3
  11  -6   4 57238.0 2412.68   2
  12  -6   4 28999.4 1491.64   3
  12  -6   4 25422.4 1582.56   2
  13  -6   4 4368.16 614.136   3
  13  -6   4 4976.01 714.084   2
  14  -6   4 10348.5 1060.80   2
  15  -6   4 273.696 364.344   2
 -16   6  -4 38072.6 2156.23   4
  16  -6   4 33439.1 2071.49   2
  17  -6   4 6807.74 962.349   2
 -17   6  -4 6982.83 996.808   4
  18  -6   4 9116.98 1139.34   2
 -18   6  -4 10746.4 1209.64   4
 -19   6  -4 1557.29 631.744   4
 -21   7   4 7045.95 1061.18   4
  21  -7  -4 7405.88 1070.47   2
  20  -7  -4 25899.4 1886.50   2
 -20   7   4 25824.1 1897.72   4
  19  -7  -4 399.228 431.168   2
 -19   7   4 794.565 519.420   4
  18  -7  -4 32793.4 1991.45   2
 -18   7   4 32743.0 2015.07   4
  17  -7  -4 2543.10 589.381   2
  16  -7  -4 3841.62 709.970   2
  15  -7  -4 61866.2 2584.52   2
  14  -7  -4 30502.3 1685.65   2
  13  -7  -4 7059.59 783.915   2
  12  -7  -4 15635.7 1111.86   2
  11  -7  -4 94382.6 2976.07   2
  10  -7  -4 18703.8 1119.65   2
   9  -7  -4 32889.3 1478.01   2
  -9   7   4 34760.1 1013.35   3
  -8   7   4 84352.8 1874.52   3
   8  -7  -4 90023.1 1958.72   5
   8  -7  -4 82613.6 2525.12   2
   7  -7  -4 5785.94 538.285   2
   7  -7  -4 4924.31 275.605   5
   6  -7  -4 186102. 3377.04   5
  -6   7   4 172246. 3407.30   3
  -5   7   4 2890.79 179.483   3
   5  -7  -4 2837.74 351.373   2
  -4   7   4 23188.9 637.590   3
   4  -7  -4 22839.2 940.959   2
   4   7  -4 22728.8 1067.66   5
   3  -7  -4 191583. 3967.28   2
   3   7  -4 197074. 4287.32   5
  -3   7   4 195194. 3609.33   3
  -3   7   4 186099. 3529.45   5
  -3  -7   4 187514. 3791.23   6
  -3   7   4 178191. 3783.66   6
   2   7  -4 4476.03 473.787   5
  -2   7   4 4911.28 303.973   3
  -2  -7   4 4952.94 338.382   6
   2  -7  -4 5407.18 383.726   2
  -2   7   4 5464.46 352.530   6
   2  -7  -4 5110.12 315.229   3
   1  -7  -4 116533. 2600.17   2
   1  -7  -4 117393. 2591.34   3
  -1   7   4 123842. 2587.63   3
   1   7  -4 116922. 3005.52   5
   0  -7  -4 47171.9 1292.22   6
   0   7   4 48183.1 1359.68   3
   0  -7   4 45674.6 1412.60   3
   0   7  -4 45487.0 1640.49   5
   1   7   4 1969.32 268.941   3
  -1   7  -4 1711.69 330.234   5
   1  -7   4 1220.02 201.731   3
   2   7   4 110686. 2674.91   3
   2  -7   4 105501. 2918.05   2
   2  -7   4 106715. 2558.81   3
   3  -7   4 8605.64 542.236   3
   3  -7   4 9500.26 724.809   2
   3   7   4 10060.4 663.324   3
   4  -7   4 11861.8 662.815   3
   4   7   4 11624.1 761.418   3
  -4   7  -4 11714.0 526.744   1
   4  -7   4 11361.0 817.650   2
   5  -7   4 20504.7 1167.62   2
   5  -7   4 20214.1 923.628   3
   5   7   4 20728.3 1082.61   3
  -5   7  -4 21461.8 755.145   1
   6  -7   4 119.774 254.278   2
   6  -7   4 549.562 176.371   3
   6   7   4 124.472 217.921   3
   7  -7   4 5738.77 643.904   2
   7   7   4 5006.45 581.757   3
   7  -7   4 4704.45 476.377   3
   8  -7   4 855.937 243.879   3
   8  -7   4 1268.54 366.324   2
   8   7   4 746.161 284.292   3
   9  -7   4 5030.80 534.509   3
   9  -7   4 3517.40 528.388   2
  10  -7   4 30766.3 1703.27   2
  10  -7   4 31127.5 1438.38   3
  11  -7   4 2061.08 408.271   3
  11  -7   4 2594.09 519.256   2
  12  -7   4 15618.0 1074.16   3
  12  -7   4 15888.4 1266.22   2
  13  -7   4 13477.8 1030.56   3
  13  -7   4 12844.7 1184.87   2
  14  -7   4 88.3488 358.019   2
  15  -7   4 46291.0 2407.57   2
  16  -7   4 428.931 371.908   2
  17  -7   4 278.485 446.589   2
 -17   7  -4 1539.40 631.422   4
  18  -7   4 48322.6 2695.97   2
 -18   7  -4 48475.4 2698.26   4
 -20   8   4 2659.73 698.328   4
  20  -8  -4 1896.49 649.453   2
  19  -8  -4 15888.0 1444.06   2
 -19   8   4 11964.3 1282.01   4
  18  -8  -4 16680.1 1433.02   2
  17  -8  -4 3882.98 728.712   2
  16  -8  -4 4635.42 771.036   2
  15  -8  -4 515.805 360.367   2
  14  -8  -4 20688.9 1412.42   2
  13  -8  -4 22997.7 1438.58   2
  12  -8  -4 22634.1 1374.32   2
  11  -8  -4 50756.0 2059.51   2
  10  -8  -4 2660.71 465.908   2
   9  -8  -4 3163.14 477.965   2
  -9   8   4 2760.30 223.297   3
   9  -8  -4 3000.46 276.663   5
   8  -8  -4 9938.47 468.075   5
   8  -8  -4 10631.1 796.013   2
  -8   8   4 10026.3 386.424   3
   7  -8  -4 11215.0 773.604   2
   7  -8  -4 11537.2 441.397   5
  -7   8   4 10413.5 338.119   3
   6  -8  -4 31697.7 1299.52   2
   5  -8  -4 37055.2 1365.37   2
   5   8  -4 36105.6 1459.94   5
   4   8  -4 182.676 223.665   5
   4  -8  -4-142.092 176.415   2
  -4   8   4 219.955 80.0599   5
  -4   8   4 206.385 57.1439   3
   3   8  -4 4363.34 479.992   5
  -3  -8   4 4607.21 330.758   6
  -3   8   4 4796.45 341.931   6
   3  -8  -4 5195.66 281.797   3
  -3   8   4 5047.26 289.994   5
  -3   8   4 5231.95 274.259   3
   3  -8  -4 4925.23 423.605   2
  -2  -8   4 17460.1 661.666   6
   2   8  -4 17327.2 929.136   5
  -2   8   4 16581.2 603.107   3
  -2   8   4 17723.6 672.659   6
   2  -8  -4 15672.2 742.695   2
   2  -8  -4 16500.6 620.809   3
   1  -8  -4 7590.12 437.314   3
   1   8  -4 7587.61 636.590   5
   1  -8  -4 8032.57 496.999   2
  -1   8   4 7744.49 435.228   3
   0  -8  -4 10840.0 512.227   6
   0   8  -4 10361.2 760.841   5
   0   8   4 9905.36 544.988   3
   0   8  -4 10320.5 507.670   6
   1   8   4 171.155 139.865   3
  -1   8  -4 147.153 216.174   5
   1  -8   4 226.219 138.186   3
   2  -8   4 49427.2 1856.46   2
   2  -8   4 53147.5 1545.68   3
   2   8   4 52093.2 1618.21   3
   3   8   4 23249.5 1045.61   3
   3  -8   4 22496.1 924.173   3
   3  -8   4 21498.1 1179.35   2
   4  -8   4 49190.3 1920.55   2
   4  -8   4 52230.6 1571.07   3
   4   8   4 52051.8 1766.43   3
   5   8   4 90261.1 2635.96   3
   5  -8   4 90093.1 2347.21   3
   5  -8   4 89629.9 2806.11   2
   6  -8   4 2248.80 428.282   2
   6   8   4 2285.54 375.839   3
   6  -8   4 2691.58 354.746   3
   7  -8   4 13110.6 787.030   3
   7  -8   4 13239.6 1011.72   2
   8  -8   4 29407.5 1264.41   3
   8  -8   4 27406.6 1530.95   2
   9  -8   4 3248.11 593.311   2
   9  -8   4 3018.70 423.853   3
  10  -8   4 47325.1 2187.20   2
  10  -8   4 48936.6 1843.60   3
  11  -8   4 6767.51 855.547   2
  11  -8   4 6968.81 698.562   3
  12  -8   4 9811.41 1036.63   2
  12  -8   4 10147.5 852.321   3
  13  -8   4-206.993 287.816   3
  13  -8   4 878.412 496.757   2
  14  -8   4 6176.16 907.364   2
  15  -8   4 2936.49 688.684   2
  16  -8   4 1279.51 457.590   2
  17  -8   4 904.252 415.768   2
 -18   8  -4 1228.81 538.806   4
  20  -9  -4 324.501 404.023   2
 -20   9   4 1161.26 546.868   4
  19  -9  -4 13312.5 1331.57   2
  18  -9  -4 39367.4 2253.15   2
  17  -9  -4 4837.76 793.589   2
  16  -9  -4 966.514 446.988   2
  15  -9  -4 23628.0 1580.88   2
  14  -9  -4 60605.8 2575.42   2
  13  -9  -4-576.026 440.297   2
  12  -9  -4 20007.7 1322.85   2
  11  -9  -4 878.635 357.555   2
  10  -9  -4 91134.4 2916.61   2
   9  -9  -4 16488.2 1078.50   2
   8  -9  -4 50139.8 1310.28   5
   8  -9  -4 52989.4 1936.45   2
   7  -9  -4 137.739 233.261   2
   6  -9  -4 91250.5 2598.72   2
   5  -9  -4 8853.33 649.780   2
   5   9  -4 8559.69 718.037   5
  -4   9   4 66454.7 1671.97   6
  -4  -9   4 66876.2 1664.68   6
   4  -9  -4 65769.0 1982.10   2
   4   9  -4 64718.1 2117.57   5
  -4   9   4 65592.8 1528.80   5
  -3   9   4 34566.1 1023.97   6
  -3  -9   4 34473.8 1020.14   6
  -3   9   4 33283.5 853.212   3
  -3   9   4 34436.5 978.264   5
   3   9  -4 32950.6 1406.18   5
   3  -9  -4 33231.6 869.744   3
   3  -9  -4 31992.3 1233.79   2
  -2   9   4 19274.8 648.922   3
  -2   9   4 17113.7 677.220   5
  -2  -9   4 19108.5 684.404   6
   2   9  -4 15848.4 943.019   5
   2  -9  -4 17174.7 640.291   3
   2  -9  -4 16607.5 818.643   2
  -1   9   4 47753.4 1323.17   3
   1  -9  -4 48637.8 1511.89   2
   0   9   4 158903. 3392.25   3
   0  -9  -4 155191. 3241.83   6
   0   9  -4 161366. 3925.22   5
  -1   9  -4 13389.6 898.537   5
   1   9   4 13223.8 694.355   3
   1  -9   4 12368.8 887.503   2
   1  -9   4 14169.9 708.719   3
   2   9   4 48967.6 1581.80   3
   2  -9   4 49419.6 1494.14   3
   2  -9   4 47550.9 1870.18   2
   3  -9   4 457.321 173.316   3
   3  -9   4 230.354 229.971   2
   3   9   4-14.1236 203.749   3
   4  -9   4 12239.2 922.776   2
   4  -9   4 11639.0 657.411   3
   4   9   4 11840.4 788.731   3
   5  -9   4 62864.7 1845.83   3
   5  -9   4 66192.8 2361.61   2
   6  -9   4 6324.43 514.269   3
   6  -9   4 6225.30 731.251   2
   7  -9   4 19585.1 1268.76   2
   7  -9   4 18922.9 947.500   3
   8  -9   4 559.918 335.920   2
   8  -9   4 97.7511 221.223   3
   9  -9   4 61437.5 2534.85   2
   9  -9   4 65548.5 2105.54   3
  10  -9   4 10268.9 1012.99   2
  10  -9   4 11621.1 831.956   3
  11  -9   4 36566.9 1997.79   2
  11  -9   4 37987.4 1624.06   3
  12  -9   4 1235.06 469.494   2
  12  -9   4 375.935 256.289   3
  13  -9   4 537.684 454.883   2
  14  -9   4 2177.20 629.962   2
  15  -9   4 80761.0 3452.02   2
  16  -9   4 655.557 492.949   2
  17  -9   4-214.975 561.347   2
  20 -10  -4 506.736 444.617   2
  19 -10  -4-0.81326 430.718   2
  18 -10  -4 5256.55 890.438   2
  17 -10  -4 25119.1 1771.22   2
  16 -10  -4 10443.7 1094.88   2
  15 -10  -4 35444.2 1992.67   2
  14 -10  -4 43854.1 2161.39   2
  13 -10  -4 222.407 305.982   2
  12 -10  -4 2040.55 467.587   2
  11 -10  -4 4332.51 646.129   2
  10 -10  -4 44813.4 1944.79   2
   9 -10  -4 107091. 3224.92   2
   8 -10  -4 9078.41 460.461   5
   8 -10  -4 9951.08 825.027   2
   7 -10  -4 6836.50 655.681   2
   6 -10  -4 661.563 242.233   2
   6  10  -4 1281.71 341.612   5
   5 -10  -4 20928.4 1083.30   2
   5  10  -4 20982.8 1152.97   5
   4 -10  -4 9710.90 692.325   2
   4  10  -4 8705.70 741.854   5
  -4  10   4 9851.59 482.565   5
  -4  10   4 9563.26 495.596   6
  -4 -10   4 9950.76 506.500   6
   3 -10  -4-65.3159 161.224   2
   3 -10  -4 349.614 79.2930   3
  -3  10   4 315.922 133.655   5
  -3  10   4 161.539 102.679   6
  -3 -10   4 165.482 103.678   6
   3  10  -4 383.786 243.920   5
  -2  10   4 29559.7 1011.49   5
   2 -10  -4 32409.9 944.554   3
   2  10  -4 29020.4 1353.83   5
   2 -10  -4 33354.7 1267.80   2
   1 -10  -4 1368.41 266.593   2
   1  10  -4 844.465 311.528   5
   0  10  -4 128970. 3471.43   5
  -1  10  -4 24275.5 1256.02   5
   1 -10   4 21931.8 1250.74   2
   1 -10   4 23532.0 967.208   3
   2 -10   4 86768.4 2811.17   2
   2 -10   4 89266.7 2261.69   3
   3 -10   4 651.738 188.479   3
   3 -10   4 529.921 333.942   2
   4 -10   4 328.743 287.739   2
   4 -10   4 128.253 134.017   3
   5 -10   4 9452.92 604.807   3
   5 -10   4 10041.7 906.760   2
   6 -10   4 40230.1 1913.28   2
   6 -10   4 43559.2 1460.97   3
   7 -10   4 173253. 3949.61   3
   7 -10   4 168469. 4723.75   2
   8 -10   4 28631.9 1674.52   2
   8 -10   4 32169.2 1304.40   3
   9 -10   4 1986.02 341.994   3
   9 -10   4 2477.20 564.162   2
  10 -10   4 3572.09 466.958   3
  10 -10   4 3685.92 672.731   2
  11 -10   4 7305.40 918.378   2
  12 -10   4 23595.6 1655.87   2
  13 -10   4 32363.8 1996.72   2
  14 -10   4 11276.8 1223.94   2
  15 -10   4 3643.57 758.879   2
  16 -10   4 13341.6 1378.90   2
  19 -11  -4 269.055 406.567   2
  18 -11  -4 2866.78 696.631   2
  17 -11  -4 12145.3 1257.79   2
  16 -11  -4 2860.92 675.536   2
  15 -11  -4 2136.11 497.150   2
  14 -11  -4 2052.28 556.310   2
  13 -11  -4 3020.31 574.519   2
  12 -11  -4-206.678 383.027   2
  11 -11  -4 22357.2 1412.25   2
  10 -11  -4 230.733 298.769   2
   9 -11  -4 16630.3 1131.97   2
   8 -11  -4 1944.57 409.689   2
   7 -11  -4 44170.9 1805.41   2
   6  11  -4 16494.4 1068.32   5
   6 -11  -4 16905.5 1040.10   2
   5 -11  -4 45329.9 1733.02   2
   5  11  -4 44663.3 1822.80   5
  -5 -11   4 48313.2 1326.93   6
   4 -11  -4 37037.5 1509.92   2
  -4  11   4 37502.1 1163.01   5
   4  11  -4 39294.8 1662.12   5
  -4 -11   4 39421.5 1132.79   6
  -4  11   4 40406.8 1144.35   6
  -3  11   4 11171.9 569.680   5
  -3  11   4 11300.0 500.681   6
  -3 -11   4 10927.6 498.206   6
   3 -11  -4 10538.8 737.148   2
   3 -11  -4 10577.1 400.109   3
   3  11  -4 9757.41 808.415   5
  -2  11   4 9233.79 547.397   5
   2  11  -4 9738.27 793.940   5
   2 -11  -4 10042.0 710.620   2
   2 -11  -4 10072.7 470.945   3
   1 -11  -4 84036.9 2389.56   2
   1  11  -4 83857.1 2636.41   5
   0  11  -4 42956.9 1803.39   5
   0 -11  -4 50046.9 1658.64   2
  -1 -11  -4 30888.1 970.265   6
  -1  11  -4 29432.4 948.958   6
  -1  11  -4 29172.2 1448.59   5
   1 -11   4 32596.2 1183.50   3
   1 -11   4 32038.4 1576.42   2
  -2  11  -4 5731.96 646.894   5
   2 -11   4 6150.76 475.937   3
   2 -11   4 5569.02 664.930   2
   3 -11   4 70209.4 1900.23   3
   3 -11   4 61637.2 2399.60   2
   4 -11   4 84839.1 2254.42   3
   4 -11   4 93572.9 3022.54   2
   5 -11   4 6216.36 727.845   2
   5 -11   4 6812.89 515.826   3
   6 -11   4 3905.05 623.331   2
   6 -11   4 5543.45 481.157   3
   7 -11   4 14484.7 1180.45   2
   7 -11   4 14906.0 817.912   3
   8 -11   4 122360. 3952.06   2
   8 -11   4 122343. 3088.85   3
   9 -11   4 28088.4 1724.82   2
  10 -11   4 2298.89 613.079   2
  11 -11   4 4346.67 718.043   2
  12 -11   4 58716.5 2790.21   2
  13 -11   4 29598.2 1953.93   2
  14 -11   4 766.781 454.913   2
  15 -11   4 459.771 490.445   2
  16 -11   4 20049.7 1728.67   2
  19 -12  -4 329.614 431.209   2
  18 -12  -4 10850.7 1238.14   2
  17 -12  -4 623.924 518.784   2
  16 -12  -4 12732.5 1302.81   2
  15 -12  -4 2686.33 634.012   2
  14 -12  -4 2424.22 546.188   2
  13 -12  -4 54705.5 2486.65   2
  12 -12  -4 1906.50 496.449   2
  11 -12  -4 30932.0 1722.93   2
  10 -12  -4 9333.30 911.577   2
   9 -12  -4 16910.6 1176.55   2
   8 -12  -4 33465.4 1652.79   2
   7 -12  -4 3388.46 515.462   2
   7  12  -4 4059.52 569.883   5
   6 -12  -4 38053.1 1675.65   2
   6  12  -4 38004.5 1751.75   5
  -5 -12   4 14.4681 140.446   6
   5 -12  -4 531.007 267.983   2
   5  12  -4-39.1241 300.404   5
  -5  12   4 515.577 140.961   6
  -4  12   4 14904.9 701.058   5
  -4 -12   4 13996.8 583.845   6
  -4  12   4 13155.6 564.792   6
   4  12  -4 14098.0 1005.80   5
   4 -12  -4 13846.5 920.839   2
  -3  12   4 35118.5 1148.60   5
   3  12  -4 33707.5 1550.19   5
   3 -12  -4 32567.1 1406.87   2
   2 -12  -4 21654.5 1115.87   2
   2  12  -4 19895.5 1182.83   5
  -2  12   4 22327.2 929.229   5
   2 -12  -4 21006.2 732.246   3
  -1  12   4 7378.11 542.582   5
   1  12  -4 6551.90 694.572   5
   1 -12  -4 8151.69 664.364   2
   0  12  -4 404.146 305.850   5
   0 -12  -4 663.264 257.624   2
   1 -12   4 94916.9 3108.38   2
  -1  12  -4 96621.1 3007.72   5
   1 -12   4 98646.4 2492.78   3
   2 -12   4 15070.3 1119.55   2
  -2  12  -4 15646.5 1065.42   5
   2 -12   4 16589.0 803.911   3
   3 -12   4 86498.8 2233.67   3
   3 -12   4 82395.1 2913.43   2
   4 -12   4 14544.4 742.573   3
   4 -12   4 15644.9 1190.66   2
   5 -12   4 12353.6 688.632   3
   5 -12   4 12208.8 1043.12   2
   6 -12   4 59650.0 2498.09   2
   6 -12   4 58414.0 1760.54   3
   7 -12   4 256.370 344.565   2
   8 -12   4 45504.9 2233.75   2
   9 -12   4 24779.2 1646.16   2
  10 -12   4 8267.00 975.981   2
  11 -12   4 33627.5 2037.09   2
  12 -12   4-31.3507 450.993   2
  13 -12   4 864.710 488.695   2
  14 -12   4 8388.84 1103.37   2
  15 -12   4 4308.88 847.671   2
  18 -13  -4-159.772 486.224   2
  17 -13  -4 15205.0 1434.90   2
  16 -13  -4 19491.8 1624.18   2
  15 -13  -4 36864.6 2156.58   2
  14 -13  -4 11695.0 1175.12   2
  13 -13  -4 21225.3 1540.85   2
  12 -13  -4 13431.2 1212.66   2
  11 -13  -4 38260.1 1988.65   2
  10 -13  -4 31378.0 1737.05   2
   9 -13  -4 1653.10 476.028   2
   8 -13  -4 9740.66 903.738   2
   7  13  -4 147892. 4193.09   5
   7 -13  -4 151976. 4161.40   2
  -6 -13   4 8689.76 509.149   6
   6 -13  -4 8366.10 797.114   2
  -6  13   4 8244.16 495.784   6
   6  13  -4 8930.80 864.070   5
   5 -13  -4 24156.7 1313.50   2
  -5 -13   4 24519.8 836.517   6
   5  13  -4 25709.9 1415.05   5
   4 -13  -4 1184.51 339.620   2
   4  13  -4 390.087 323.035   5
  -4 -13   4 758.771 139.706   6
  -4  13   4 866.276 217.271   5
   3  13  -4 6169.39 687.232   5
   3 -13  -4 5863.94 616.945   2
  -3  13   4 5331.81 457.606   5
  -2  13   4 83250.0 2253.18   5
   2  13  -4 81355.3 2755.38   5
   2 -13  -4 87568.3 2625.21   2
   1  13  -4 22073.6 1294.41   5
  -1  13   4 22227.1 1018.22   5
   1 -13  -4 21238.4 1148.10   2
   0 -13  -4 33850.0 1474.78   2
   0  13  -4 33111.4 1625.29   5
   0 -13   4 35579.9 1310.24   3
   1 -13   4 6755.95 795.921   2
  -1  13  -4 5766.16 699.538   5
   1 -13   4 5387.07 473.686   3
  -2  13  -4 10039.5 895.126   5
   2 -13   4 9345.90 602.617   3
   2 -13   4 9394.75 920.579   2
   3 -13   4 3446.73 573.254   2
   3 -13   4 4601.97 416.848   3
   4 -13   4 13690.1 707.230   3
   4 -13   4 12267.8 1090.59   2
   5 -13   4 10680.7 1023.16   2
   6 -13   4 8810.41 936.697   2
   7 -13   4 2841.77 612.884   2
   8 -13   4 13521.9 1233.94   2
   9 -13   4 18988.8 1472.41   2
  10 -13   4 582.388 423.229   2
  11 -13   4 9391.46 1101.53   2
  12 -13   4 6190.44 916.925   2
  13 -13   4-152.298 453.272   2
  14 -13   4 37544.1 2373.12   2
  15 -13   4 594.137 410.227   2
  17 -14  -4 11575.6 1296.48   2
  16 -14  -4 21119.9 1717.64   2
  15 -14  -4-2633.25 695.133   2
  14 -14  -4 9031.52 1084.23   2
  13 -14  -4 673.534 445.130   2
  12 -14  -4 56727.8 2636.87   2
  11 -14  -4 1846.52 549.350   2
  10 -14  -4 3692.80 642.832   2
   9 -14  -4 94.8758 292.115   2
   8  14  -4 12297.7 1086.16   5
   8 -14  -4 13525.4 1088.22   2
   7  14  -4 11855.8 1044.88   5
   7 -14  -4 12604.0 1035.98   2
   6 -14  -4 69772.9 2575.46   2
   6  14  -4 69993.2 2623.36   5
   5 -14  -4 1286.16 352.813   2
   5  14  -4 1346.22 399.010   5
  -4  14   4 3743.17 398.486   5
   4 -14  -4 3691.89 540.370   2
   4  14  -4 3351.10 544.167   5
   3  14  -4 10306.9 903.917   5
   3 -14  -4 11050.0 883.022   2
  -3  14   4 10801.3 680.223   5
  -2  14   4 29351.7 1212.18   5
   2  14  -4 29358.4 1571.44   5
   2 -14  -4 31809.1 1492.76   2
   1  14  -4-89.3065 342.072   5
  -1  14   4 817.369 224.489   5
   1 -14  -4 161.304 285.259   2
   0 -14  -4 8406.81 736.255   2
   0  14   4 8541.05 671.901   5
   0 -14   4 8934.62 624.157   3
   0  14  -4 8178.81 818.581   5
  -1  14  -4 1358.53 426.027   5
  -1 -14  -4 1796.56 387.380   2
   1 -14   4 1008.43 373.363   2
   1 -14   4 1530.27 283.396   3
   2 -14   4 292.455 186.824   3
  -2  14  -4 95.1338 302.424   5
   2 -14   4-263.841 409.029   2
   3 -14   4 16963.0 1284.01   2
   4 -14   4 49086.4 2289.40   2
   5 -14   4 199.547 352.638   2
   6 -14   4 1191.79 420.390   2
   7 -14   4 14161.1 1259.27   2
   8 -14   4 2057.27 517.595   2
   9 -14   4 31989.9 1989.37   2
  10 -14   4 3516.17 703.491   2
  11 -14   4 17363.3 1514.56   2
  12 -14   4 1622.08 535.494   2
  13 -14   4 13128.7 1376.84   2
  14 -14   4 179.962 475.860   2
  17 -15  -4 2129.52 709.475   2
  16 -15  -4 1614.91 609.905   2
  15 -15  -4-556.249 513.811   2
  14 -15  -4 47001.1 2515.44   2
  13 -15  -4-88.1239 398.703   2
  12 -15  -4 6723.74 916.804   2
  11 -15  -4-91.4624 433.805   2
  10 -15  -4 53345.2 2449.62   2
   9  15  -4 1391.67 482.830   5
   9 -15  -4 2265.60 550.246   2
   8  15  -4 2874.86 604.265   5
   8 -15  -4 2438.57 536.842   2
   7 -15  -4 16932.2 1235.16   2
   7  15  -4 16594.8 1256.61   5
   6 -15  -4 342.387 315.817   2
   6  15  -4-50.9912 346.318   5
   5  15  -4 75122.0 2783.13   5
   5 -15  -4 76651.1 2723.66   2
   4  15  -4 82583.2 2902.86   5
   4 -15  -4 79135.9 2752.25   2
  -3  15   4 8115.96 631.804   5
   3  15  -4 8361.52 876.283   5
   3 -15  -4 7991.72 784.405   2
   2  15  -4 21686.1 1369.33   5
   2 -15  -4 21591.2 1264.84   2
  -2  15   4 20501.4 1039.59   5
  -1  15   4 1096.95 263.131   5
   1 -15  -4 503.354 278.030   2
   1  15  -4 1069.27 432.664   5
   0  15   4 2637.86 420.365   5
   0  15  -4 1383.01 400.092   5
   0 -15  -4 1515.09 395.454   2
   0 -15   4 1994.58 315.318   3
   0 -15   4 1790.58 484.369   2
  -1 -15  -4 72736.6 2500.54   2
  -1  15  -4 73249.5 2708.72   5
   1  15   4 72632.4 2349.85   5
   1 -15   4 70688.9 2849.09   2
  -2  15  -4 25525.8 1508.31   5
   2 -15   4 25122.0 1613.97   2
   3 -15   4 15726.9 1307.15   2
   4 -15   4 702.327 441.350   2
   5 -15   4 10046.1 1066.31   2
   6 -15   4 14349.2 1278.26   2
   7 -15   4 1347.68 503.269   2
   8 -15   4-252.487 529.060   2
   9 -15   4 3673.04 703.381   2
  10 -15   4 467.314 420.051   2
  11 -15   4 39295.3 2372.31   2
  12 -15   4 5524.00 965.937   2
  13 -15   4 6252.87 994.052   2
  16 -16  -4 7901.98 1101.74   2
  15 -16  -4 1287.53 475.681   2
  14 -16  -4 5371.42 901.571   2
  13 -16  -4 37093.0 2232.53   2
  12 -16  -4 13794.9 1317.68   2
  11 -16  -4 12802.7 1208.34   2
  10  16  -4 361.599 395.688   5
  10 -16  -4 464.241 361.405   2
   9 -16  -4 41655.4 2145.94   2
   9  16  -4 44147.5 2215.07   5
   8  16  -4 36799.7 1978.74   5
   8 -16  -4 35631.7 1937.71   2
   7  16  -4 17401.2 1319.57   5
   7 -16  -4 17324.1 1300.23   2
   6 -16  -4 2419.88 523.643   2
   6  16  -4 2288.23 550.871   5
   5 -16  -4 19428.8 1315.41   2
   5  16  -4 18391.4 1331.19   5
   4 -16  -4 25576.2 1497.18   2
   4  16  -4 24573.4 1528.12   5
   3  16  -4 2041.02 532.211   5
   3 -16  -4 1277.50 404.440   2
   2 -16  -4 5600.36 700.391   2
   2  16  -4 5821.60 761.551   5
   1  16  -4 7551.07 849.930   5
  -1  16   4 8411.73 697.818   5
   1 -16  -4 8835.63 837.761   2
   0  16  -4 26662.4 1589.23   5
   0 -16  -4 28876.5 1527.11   2
   0  16   4 27716.7 1336.30   5
   0 -16   4 27349.7 1726.01   2
   1 -16   4 997.640 396.710   2
   1  16   4 1574.91 362.161   5
  -1 -16  -4 1294.30 358.882   2
  -1  16  -4 1490.25 507.803   5
   2 -16   4-439.671 412.876   2
   3 -16   4 2311.52 625.131   2
   4 -16   4 1522.12 550.364   2
   5 -16   4 4373.79 771.692   2
   6 -16   4 342.743 361.050   2
   7 -16   4 4092.05 761.250   2
   8 -16   4 2940.52 720.016   2
   9 -16   4 589.267 444.277   2
  10 -16   4 9600.73 1198.16   2
  11 -16   4 11462.5 1312.06   2
  12 -16   4 16065.4 1569.11   2
  15 -17  -4 10354.6 1251.52   2
  14 -17  -4 671.514 454.844   2
  13 -17  -4 571.514 463.761   2
  12  17  -4-503.137 572.005   5
  12 -17  -4 3.78501 424.036   2
  11  17  -4 4437.03 789.669   5
  11 -17  -4 5537.45 853.282   2
  10  17  -4-358.125 501.116   5
  10 -17  -4 71.1254 365.310   2
   9  17  -4 20264.1 1518.18   5
   9 -17  -4 20996.2 1528.63   2
   8  17  -4-764.722 505.698   5
   8 -17  -4-376.813 375.998   2
   7 -17  -4 595.508 364.644   2
   7  17  -4 764.512 460.071   5
   6 -17  -4 15988.0 1268.21   2
   6  17  -4 16577.4 1337.25   5
   5 -17  -4 206.911 375.876   2
   5  17  -4-335.922 408.384   5
   4 -17  -4 61720.9 2536.30   2
   4  17  -4 65346.7 2664.62   5
   3  17  -4 3001.37 596.752   5
   3 -17  -4 2798.11 561.151   2
   2 -17  -4 450.776 310.549   2
   2  17  -4-68.7476 366.186   5
  -1 -17   4 37333.2 2091.14   2
   1 -17  -4 38675.9 1874.18   2
   1  17  -4 38951.1 1992.18   5
   0  17  -4 2564.13 601.322   5
   0 -17  -4 1104.89 352.988   2
   0 -17   4 1995.26 585.557   2
   1 -17   4 32506.3 1971.30   2
  -1  17  -4 34016.0 1888.09   5
   1  17   4 33455.1 1586.21   5
  -1 -17  -4 37519.3 1826.88   2
  -2 -17  -4 5190.16 706.063   2
   2  17   4 4968.48 615.030   5
   2 -17   4 6488.09 913.749   2
   3 -17   4 149.598 386.492   2
   4 -17   4 40754.1 2276.10   2
   5 -17   4 32714.5 2058.98   2
   6 -17   4 4386.71 799.685   2
   7 -17   4 1123.36 439.174   2
   8 -17   4 10637.0 1233.23   2
   9 -17   4 14325.6 1453.74   2
  10 -17   4 13835.3 1472.28   2
  11 -17   4 2558.72 681.894   2
  14 -18  -4 999.080 486.553   2
  13  18  -4 16241.6 1502.52   5
  13 -18  -4 15565.2 1479.99   2
  12 -18  -4 14831.0 1439.92   2
  12  18  -4 15822.0 1448.88   5
  11  18  -4 1437.37 538.143   5
  11 -18  -4 1997.93 544.141   2
  10  18  -4 4310.63 802.102   5
  10 -18  -4 4197.52 729.142   2
   9 -18  -4 795.520 403.145   2
   9  18  -4 779.220 440.501   5
   8 -18  -4 960.442 430.843   2
   8  18  -4 1443.47 487.685   5
   7 -18  -4 14165.8 1244.68   2
   7  18  -4 12826.7 1221.90   5
   6  18  -4 548.086 325.480   5
   6 -18  -4 232.443 407.464   2
   5 -18  -4 36701.9 1980.68   2
   5  18  -4 36253.5 2003.12   5
   4 -18  -4 199.195 305.371   2
   4  18  -4 180.239 356.148   5
   3  18  -4 57024.5 2526.06   5
   3 -18  -4 54182.5 2405.06   2
   2 -18  -4 4882.67 729.273   2
   2  18  -4 5620.52 793.667   5
   1  18  -4 22497.8 1548.86   5
  -1 -18   4 23897.4 1720.24   2
   1 -18  -4 26605.2 1579.79   2
   0 -18   4 595.182 449.604   2
   0  18  -4 599.877 388.633   5
   0 -18  -4 957.181 370.960   2
  -1  18  -4 20024.3 1484.17   5
  -1 -18  -4 21563.5 1412.27   2
  -2 -18  -4 73953.0 2790.98   2
   2 -18   4 71679.8 3142.92   2
   2  18   4 71359.3 2600.07   5
   3 -18   4-51.1451 509.234   2
   3  18   4 346.214 356.897   5
   4 -18   4 26941.8 1896.52   2
   5 -18   4 45634.8 2522.75   2
   6 -18   4 29671.9 2030.82   2
   7 -18   4 18765.6 1659.41   2
   8 -18   4 978.786 437.260   2
   9 -18   4 896.199 493.963   2
  10 -18   4 80491.4 3699.59   2
  14 -19  -4-462.351 596.603   2
  13 -19  -4 1224.96 582.433   2
  12  19  -4-530.561 595.319   5
  12 -19  -4 147.468 441.353   2
  11 -19  -4 14965.1 1425.49   2
  11  19  -4 16442.7 1473.01   5
  10  19  -4-203.080 485.376   5
  10 -19  -4-503.173 479.388   2
   9  19  -4 185.360 473.450   5
   9 -19  -4 410.855 360.304   2
   8 -19  -4 13115.3 1305.20   2
   8  19  -4 11494.6 1214.06   5
   7 -19  -4 21953.0 1612.84   2
   7  19  -4 21502.9 1608.39   5
   6  19  -4 436.876 364.136   5
   6 -19  -4-233.919 464.229   2
   5 -19  -4 220.573 411.218   2
   5  19  -4-43.1010 423.581   5
   4 -19  -4 2734.88 545.823   2
   4  19  -4 2625.63 588.105   5
   3 -19  -4 143.088 368.770   2
   3  19  -4 929.944 474.584   5
   2 -19  -4 52523.2 2417.39   2
   2  19  -4 53834.5 2529.05   5
  -2 -19   4 53799.5 2696.24   2
  -1 -19   4 13208.3 1351.60   2
   1 -19  -4 13438.4 1187.06   2
   1  19  -4 13691.0 1235.50   5
   0 -19  -4 10455.1 1020.41   2
   0  19  -4 11450.0 1131.41   5
   0 -19   4 10526.8 1215.00   2
  -1  19  -4 67.7495 395.788   5
   1 -19   4 704.279 430.930   2
   2 -19   4 15419.1 1474.63   2
   3 -19   4-74.3448 480.164   2
   4 -19   4-884.096 545.551   2
   5 -19   4 10642.2 1237.72   2
   6 -19   4 6597.36 994.230   2
   7 -19   4 3087.09 819.789   2
   8 -19   4 7655.78 1145.13   2
   9 -19   4 11772.5 1377.24   2
  12 -20  -4 1153.85 559.605   2
  11  20  -4 4010.15 812.511   5
  11 -20  -4 3012.84 715.946   2
  10 -20  -4 20257.4 1710.84   2
  10  20  -4 23028.8 1769.24   5
   9  20  -4 1686.78 623.562   5
   9 -20  -4 434.729 412.959   2
   8  20  -4 33702.3 2093.46   5
   8 -20  -4 31355.3 2028.70   2
   7  20  -4-568.712 445.591   5
   7 -20  -4-243.710 425.645   2
   6 -20  -4 24135.8 1723.71   2
   6  20  -4 27861.7 1847.33   5
   5  20  -4 6731.91 938.002   5
   5 -20  -4 6246.66 908.420   2
   4  20  -4 423.073 411.785   5
   4 -20  -4 983.155 424.697   2
   3  20  -4 4436.23 766.274   5
   3 -20  -4 4215.81 716.063   2
   2 -20  -4 22727.1 1602.91   2
   2  20  -4 24091.1 1688.14   5
  -2 -20   4 25511.7 1868.47   2
   1  20  -4 11218.2 1163.14   5
  -1 -20   4 9600.34 1161.79   2
   0  20  -4 2695.95 662.332   5
   0 -20   4 3037.29 736.974   2
  -1  20  -4 5210.45 805.664   5
   1 -20   4 6227.84 933.769   2
   2 -20   4 30664.8 2095.78   2
   3 -20   4 3549.15 774.633   2
   4 -20   4 710.664 510.120   2
   5 -20   4 11144.7 1307.00   2
   6 -20   4 5449.84 1005.46   2
   7 -20   4 39337.9 2525.07   2
  11 -21  -4-236.104 647.038   2
  10 -21  -4 1327.87 613.810   2
   9  21  -4 2889.11 759.312   5
   9 -21  -4 1510.68 599.346   2
   8  21  -4-0.80575 442.797   5
   8 -21  -4 1045.37 544.516   2
   7 -21  -4 221.118 466.707   2
   7  21  -4 631.159 393.280   5
   6 -21  -4 3275.63 777.056   2
   6  21  -4 3079.51 718.029   5
   5 -21  -4 3368.00 729.285   2
   5  21  -4 3698.74 711.909   5
   4 -21  -4 1182.48 455.626   2
   4  21  -4 238.527 475.863   5
  -3 -21   4-39.1077 478.606   2
   3  21  -4-72.1831 433.158   5
  -2 -21   4 372.460 420.499   2
   2  21  -4-484.257 425.945   5
  -1 -21   4 8200.40 1158.47   2
   1  21  -4 6495.38 959.392   5
   0 -21   4 808.657 514.382   2
   0  21  -4 1260.91 469.141   5
   1 -21   4 256.040 458.250   2
   2 -21   4 419.030 424.969   2
   3 -21   4 3437.98 762.461   2
   4 -21   4 8124.00 1113.41   2
   5 -21   4-360.624 573.453   2
  10 -22  -4 14731.7 1543.79   2
   9 -22  -4 699.675 548.899   2
   8 -22  -4 38198.8 2370.55   2
   7 -22  -4 288.439 469.615   2
   7  22  -4-184.004 388.512   5
   6  22  -4 2289.67 612.164   5
   5  22  -4 15518.1 1462.60   5
  -4 -22   4 3657.25 845.507   2
   4  22  -4 5114.83 835.230   5
  -3 -22   4 3912.47 814.054   2
   3  22  -4 4310.75 802.498   5
   2  22  -4 942.132 465.603   5
  -2 -22   4 1800.79 706.114   2
  -1 -22   4 18374.7 1692.70   2
   1  22  -4 17299.3 1515.81   5
   0  22  -4-550.019 565.985   5
   0 -22   4-282.681 466.762   2
   1 -22   4 15056.5 1550.86   2
   2 -22   4 7294.32 1089.65   2
   3 -22   4-1666.36 625.597   2
   5  23  -4 603.294 494.012   5
   4  23  -4 1142.27 554.057   5
   3  23  -4-719.905 553.150   5
   2  23  -4 25875.7 1907.44   5
   1  23  -4 3009.22 684.004   5
  23   0  -5 228.250 419.240   1
  22   0  -5 366.602 395.812   1
  21   0  -5-36.9131 409.000   1
 -21   0   5-742.080 493.045   4
  20   0  -5 546.070 443.715   1
 -20   0   5-579.307 542.549   4
  19   0  -5 110.703 378.953   1
 -19   0   5-82.3718 422.498   4
 -18   0   5 776.093 440.595   4
  18   0  -5 50.3947 350.334   1
 -17   0   5 475.176 452.917   4
  17   0  -5 270.032 413.739   1
 -16   0   5 483.303 368.235   4
 -15   0   5 1421.91 448.854   4
 -14   0   5 317.963 374.484   4
 -13   0   5-66.0261 305.670   4
 -12   0   5-110.903 264.712   4
 -11   0   5-89.2554 267.690   4
 -10   0   5 1321.89 293.283   4
  -9   0   5 408.045 238.698   4
  -8   0   5 9.43403 198.298   4
  -7   0   5-101.236 164.026   4
  -6   0   5 424.616 165.015   4
  -5   0   5 28.5050 94.7663   4
   5   0  -5 204.181 110.507   1
   4   0  -5 367.168 99.8078   4
   4   0  -5 646.096 155.585   1
   4   0  -5 357.687 119.310   5
  -3   0   5 206.397 140.683   6
   3   0  -5 79.8729 56.9786   4
   3   0  -5 79.1056 93.3977   1
   3   0  -5 334.225 127.858   5
  -2   0   5 380.787 116.112   5
   2   0  -5 276.005 57.0221   4
  -2   0   5 625.119 167.537   6
   2   0  -5 839.431 140.481   1
  -2   0   5 216.486 127.601   3
  -2   0   5 140.051 83.4461   1
  -1   0   5 607.226 183.821   6
  -1   0   5 345.063 151.196   3
   0   0   5 289.399 73.2626   1
   0   0   5 191.470 70.2369   2
   1   0   5 421.860 172.041   3
   1   0   5 286.008 92.9276   2
   2   0   5 216.632 105.191   2
   2   0   5 157.204 143.898   3
  -2   0  -5 339.212 107.400   2
   3   0   5 87.1281 156.865   3
   3   0   5 207.528 119.548   2
  -3   0  -5 81.9940 94.5612   2
   4   0   5 187.570 196.086   3
   4   0   5 238.364 158.268   2
   5   0   5 141.068 177.690   3
   5   0   5 205.808 146.409   2
  -5   0  -5-77.6528 142.764   4
   6   0   5-35.5943 158.889   2
   6   0   5-133.809 259.350   3
  -6   0  -5-133.883 175.710   4
   7   0   5 310.732 208.541   2
   7   0   5 434.126 244.716   3
  -7   0  -5 286.476 231.274   4
   8   0   5 31.3848 206.112   2
   8   0   5 430.022 285.156   3
  -8   0  -5-129.465 215.444   4
   9   0   5-38.5555 284.739   3
  -9   0  -5-295.546 261.952   4
   9   0   5-238.335 250.738   2
  10   0   5 165.607 215.182   2
 -10   0  -5-75.7458 261.758   4
  10   0   5 63.1761 291.696   3
  11   0   5-60.6663 308.821   3
  11   0   5 7.67869 262.974   2
 -11   0  -5-215.779 272.655   4
  12   0   5-63.1323 261.159   2
  12   0   5-328.846 367.959   3
 -12   0  -5-146.010 259.353   4
  13   0   5 211.338 274.268   2
  13   0   5-280.950 376.942   3
 -13   0  -5 366.758 407.620   4
  14   0   5 495.160 348.481   2
 -14   0  -5 234.137 330.557   4
  15   0   5 705.751 450.828   2
 -15   0  -5 661.636 421.794   4
 -16   0  -5-205.883 391.154   4
 -17   0  -5 163.695 361.078   4
 -18   0  -5-10.7698 444.978   4
  23   1  -5 308.524 446.035   1
  23  -1  -5 227.150 485.858   1
  22  -1  -5 39507.4 2353.66   1
  22   1  -5 44724.1 2516.25   1
 -22   1   5 39405.4 2388.17   4
  21  -1  -5 5093.33 855.315   1
 -21   1   5 5553.11 923.935   4
  21   1  -5 3443.77 720.140   1
  20  -1  -5 2218.38 565.001   1
 -20   1   5 2388.33 627.702   4
  20   1  -5 2358.67 597.680   1
  19  -1  -5 43147.4 2251.29   1
 -19   1   5 42036.4 2234.88   4
  18  -1  -5 1375.64 468.546   1
 -18   1   5 605.013 447.619   4
 -18  -1   5 492.874 442.928   4
 -17  -1   5 56880.2 2470.00   4
 -17   1   5 54444.6 2415.45   4
  17  -1  -5 54177.9 2416.89   1
 -16   1   5 56197.1 2384.76   4
 -16  -1   5 56884.9 2389.30   4
  16  -1  -5 59654.4 2439.73   1
 -15   1   5 7161.64 800.109   4
 -15  -1   5 7703.49 815.249   4
  15  -1  -5 8845.39 866.114   1
 -14  -1   5 27485.8 1491.39   4
  14  -1  -5 28244.1 1526.75   1
 -14   1   5 27583.2 1502.87   4
 -13  -1   5 21177.0 1231.82   4
 -13   1   5 20293.1 1216.61   4
  13  -1  -5 20369.8 1229.38   1
 -12   1   5 1837.04 387.816   4
 -12  -1   5 1167.53 327.057   4
  12  -1  -5 1880.30 386.707   1
 -11   1   5 96545.8 2783.82   4
 -11  -1   5 97177.5 2781.51   4
  11  -1  -5 93896.1 2811.21   1
 -10   1   5 24295.3 1153.69   4
 -10  -1   5 25074.3 1156.12   4
  10  -1  -5 24248.9 1194.55   1
   9  -1  -5-4.32700 194.023   1
  -9   1   5 2.79805 200.145   4
  -9  -1   5 303.510 199.239   4
  -8  -1   5 11335.2 696.068   4
  -8   1   5 11406.5 687.825   4
   8  -1  -5 11931.4 746.145   1
   7  -1  -5 264715. 5657.55   1
  -7   1   5 276052. 5508.29   4
  -7  -1   5 280247. 5539.59   4
   6  -1  -5 6617.76 491.967   1
  -6   1   5 6171.94 420.798   4
   5  -1  -5 1903.61 257.204   1
   5   1  -5 1964.37 227.448   5
   5  -1  -5 1867.53 183.609   5
  -5   1   5 1960.54 212.425   4
  -4   1   5 56343.7 1367.75   2
   4   1  -5 55728.8 1451.33   5
   4  -1  -5 56228.6 1312.48   5
  -4   1   5 53411.7 1298.13   4
   4   1  -5 53275.1 1343.83   4
   4  -1  -5 53249.6 1512.48   1
  -3  -1   5 12379.5 561.818   5
  -3  -1   5 11742.1 600.197   6
  -3   1   5 12323.0 410.836   4
   3   1  -5 12092.2 538.766   1
   3   1  -5 12011.8 566.013   5
  -3   1   5 12707.1 462.062   2
  -3   1   5 12709.0 618.002   6
   3  -1  -5 11467.0 557.178   1
  -3   1   5 11428.2 581.553   3
  -3   1   5 11910.5 472.596   5
   3  -1  -5 11957.0 488.214   5
   2   1  -5 121065. 2566.60   1
  -2   1   5 128263. 2801.54   3
  -2  -1   5 124488. 2801.84   6
  -2   1   5 125513. 2804.87   6
   2   1  -5 125955. 2763.21   5
  -2   1   5 131005. 2687.25   1
  -2   1   5 125559. 2616.94   5
  -2  -1   5 123594. 2840.83   3
  -1  -1   5 256236. 4920.00   6
   1   1  -5 231337. 4510.99   1
  -1   1   5 250152. 4909.87   6
  -1  -1   5 249861. 4939.68   3
  -1   1   5 252391. 4684.80   1
  -1   1   5 235735. 4871.99   3
   0   1   5 40534.8 1284.70   3
   0   1   5 41798.6 915.394   2
   0  -1   5 39263.9 1288.07   3
   1  -1   5 98034.9 1869.14   1
   1  -1   5 99195.0 2435.11   3
   1   1   5 100272. 1981.81   2
  -1  -1  -5 96174.6 1890.73   4
   1  -1   5 100984. 2202.76   2
   1   1   5 100111. 2438.40   3
   2  -1   5 12981.9 592.344   2
   2   1   5 12122.0 689.592   3
   2  -1   5 12572.3 695.144   3
   2   1   5 12914.0 493.663   2
  -2  -1  -5 13664.8 468.775   4
  -2  -1  -5 12838.4 494.344   2
   3   1   5 17870.4 877.143   3
   3   1   5 17938.8 672.474   2
   3  -1   5 17189.5 746.947   2
  -3  -1  -5 17480.4 634.430   4
   3  -1   5 17946.5 876.683   3
  -3  -1  -5 19907.3 699.788   2
   4   1   5 103212. 2655.89   3
   4   1   5 98748.8 2263.65   2
  -4  -1  -5 92653.4 2198.17   4
   4  -1   5 98246.7 2596.92   3
   4  -1   5 95730.4 2389.55   2
   5  -1   5 64017.3 1886.57   2
   5  -1   5 67320.1 2050.39   3
  -5  -1  -5 63876.6 1728.48   4
   5   1   5 63906.9 1762.74   2
   5   1   5 65971.3 2058.24   3
  -6  -1  -5 1785.16 291.361   4
   6   1   5 2306.84 382.197   3
   6   1   5 1980.66 281.784   2
   6  -1   5 2034.32 369.941   3
   6  -1   5 2803.24 378.374   2
   7   1   5 42360.9 1474.41   2
  -7  -1  -5 41311.8 1444.93   4
   7   1   5 41876.6 1687.84   3
   7  -1   5 41912.2 1554.83   2
   7  -1   5 40994.0 1635.52   3
   8   1   5 57715.1 1886.11   2
   8   1   5 58490.8 2125.72   3
  -8   1  -5 57616.8 1906.67   4
  -8  -1  -5 57331.5 1861.55   4
   8  -1   5 55987.9 1943.37   2
   8  -1   5 60052.1 2113.24   3
   9   1   5 11579.0 907.073   3
   9   1   5 9824.36 740.891   2
  -9  -1  -5 10778.2 773.328   4
   9  -1   5 10083.7 834.711   3
  -9   1  -5 10582.4 785.957   4
   9  -1   5 9559.96 763.082   2
  10  -1   5 3389.81 481.463   2
  10   1   5 4063.24 514.612   2
  10  -1   5 5884.34 663.613   3
  10   1   5 4250.63 609.487   3
 -10   1  -5 3836.07 537.027   4
 -10  -1  -5 4126.17 520.907   4
  11  -1   5 45274.3 1939.91   2
  11   1   5 46819.5 1896.70   2
  11   1   5 46101.8 2076.23   3
 -11   1  -5 46164.5 1902.39   4
  11  -1   5 48066.7 2071.89   3
 -11  -1  -5 52032.2 1958.37   4
  12  -1   5 16876.7 1180.78   2
 -12  -1  -5 15710.3 1083.74   4
  12   1   5 18725.4 1180.34   2
  12  -1   5 17046.8 1224.47   3
  12   1   5 16866.7 1249.18   3
 -12   1  -5 15471.9 1101.53   4
  13   1   5 1610.29 541.412   3
  13  -1   5 1226.63 388.619   2
  13   1   5 1444.13 449.928   2
 -13   1  -5 989.336 383.977   4
 -13  -1  -5 1402.40 408.904   4
  13  -1   5 1382.08 505.257   3
  14  -1   5 78791.1 2964.69   2
  14  -1   5 82778.7 3098.82   3
 -14   1  -5 75108.8 2873.88   4
 -14  -1  -5 81168.3 2901.54   4
 -15   1  -5 937.958 512.346   4
  15  -1   5 1553.47 573.434   2
 -15  -1  -5 1203.50 493.016   4
 -16  -1  -5 52266.3 2408.48   4
  16  -1   5 50188.5 2428.88   2
 -16   1  -5 50207.5 2396.42   4
 -17   1  -5 2382.40 609.962   4
  17  -1   5 3487.61 681.439   2
 -18   1  -5 1330.28 492.946   4
 -19   1  -5 15965.6 1465.94   4
  23   2  -5 321.316 469.963   1
  23  -2  -5-269.298 517.811   1
  22  -2  -5 809.089 576.505   1
  22   2  -5-181.648 440.209   1
 -22   2   5-205.788 440.293   4
  21  -2  -5 24417.5 1781.54   1
 -21   2   5 29799.6 1990.19   4
  20  -2  -5 3797.19 722.919   1
 -20   2   5 3755.35 699.270   4
  19  -2  -5 2057.67 562.251   1
 -19   2   5 1347.79 497.097   4
  18  -2  -5 1368.95 455.144   1
 -18   2   5 888.426 444.243   4
  17  -2  -5 19916.4 1405.43   1
 -17   2   5 18763.0 1394.01   4
  16  -2  -5 75324.7 2830.94   1
 -16   2   5 74411.2 2843.45   4
  15  -2  -5 19914.5 1305.87   1
 -15   2   5 21235.2 1351.37   4
  14  -2  -5-40.3875 325.404   1
 -14   2   5 362.858 316.526   4
  14  -2  -5 179.350 317.833   2
 -13   2   5 20547.7 1228.10   4
  13  -2  -5 22264.1 1281.56   1
  13  -2  -5 20824.5 1222.88   2
 -13  -2   5 17796.9 1150.93   4
  12  -2  -5 19878.3 1172.95   1
 -12   2   5 20654.4 1163.59   4
  12  -2  -5 20708.7 1173.04   2
  11  -2  -5 26395.3 1310.10   1
  11  -2  -5 26472.0 1270.22   2
 -11   2   5 26599.7 1292.11   4
  10  -2  -5 40620.2 1614.93   1
  10  -2  -5 39584.6 1527.75   2
 -10   2   5 41315.2 1560.17   4
   9  -2  -5 50817.0 1764.79   1
   9  -2  -5 47398.2 1629.18   2
  -9   2   5 47719.9 1623.46   4
   8  -2  -5 146507. 3517.48   1
   8  -2  -5 143771. 3364.39   2
  -8   2   5 141508. 3351.79   4
   7  -2  -5 24886.6 982.583   2
   7  -2  -5 24035.7 1060.54   1
   6  -2  -5 109.358 142.030   1
   6  -2  -5 268.640 125.346   2
   5   2  -5 23333.4 884.036   5
   5  -2  -5 22379.8 794.005   2
   5  -2  -5 24303.4 659.111   5
   4   2  -5 21926.1 846.954   5
   4  -2  -5 23322.4 646.906   5
   4  -2  -5 21883.7 883.884   1
  -4   2   5 22393.7 741.070   2
  -3  -2   5 276660. 5545.57   6
  -3   2   5 288466. 5576.51   6
   3   2  -5 275337. 5552.71   5
  -3   2   5 280624. 5194.27   5
  -3   2   5 288336. 5224.58   2
  -3   2   5 291625. 5527.89   3
  -2   2   5 1733.12 234.536   3
  -2  -2   5 1733.89 244.405   6
  -2   2   5 1751.63 236.476   6
  -2   2   5 1726.63 172.021   5
   2   2  -5 1391.31 229.070   5
  -2   2   5 2001.11 132.884   2
  -1   2   5 16652.7 727.755   3
  -1  -2   5 17784.0 761.032   6
   1   2  -5 16412.3 522.065   1
  -1   2   5 18943.9 774.079   6
  -1  -2   5 18389.1 787.344   3
   0   2   5 65602.7 1780.96   3
   0  -2   5 69234.9 1838.13   3
   1  -2   5 136353. 3059.43   3
   1   2   5 140370. 3085.54   3
   1  -2   5 126920. 2877.57   2
   1   2   5 131642. 2462.35   2
   2   2   5 5972.49 287.220   2
   2  -2   5 5578.58 454.213   3
   2   2   5 5498.07 460.249   3
  -2  -2  -5 5822.69 288.767   2
   2  -2   5 6661.30 443.696   2
  -3  -2  -5 247.982 96.9027   2
   3  -2   5 234.963 181.764   3
   3  -2   5 502.522 168.819   2
   3   2   5 194.404 97.4855   2
   4   2   5 31365.0 972.917   2
  -4  -2  -5 29885.0 967.448   4
   4  -2   5 30620.2 1224.35   3
   4  -2   5 31807.1 1172.29   2
   4   2   5 28585.5 1226.49   3
  -4  -2  -5 31050.1 993.024   2
   5   2   5 10387.0 560.788   2
   5   2   5 11902.1 772.747   3
   5  -2   5 10457.1 672.411   2
   5  -2   5 10683.8 722.381   3
  -5  -2  -5 10298.4 571.430   4
   6  -2   5 72739.4 2251.42   3
   6   2   5 77155.0 2355.85   3
   6  -2   5 71355.8 2179.90   2
  -6  -2  -5 75136.5 2010.24   4
   6   2   5 75033.4 2000.51   2
   7   2   5 51188.0 1628.66   2
   7   2   5 54059.5 1959.57   3
  -7  -2  -5 50799.1 1637.06   4
   7  -2   5 50414.0 1852.51   3
   7  -2   5 49119.9 1779.19   2
   8   2   5 112986. 3248.64   3
   8   2   5 109233. 2870.61   2
   8  -2   5 113779. 3174.87   3
  -8  -2  -5 109156. 2877.05   4
   8  -2   5 111085. 3090.87   2
   9  -2   5 10558.8 835.307   2
  -9  -2  -5 9967.02 741.896   4
   9  -2   5 10266.4 855.819   3
   9   2   5 9978.09 721.922   2
   9   2   5 10364.0 870.041   3
 -10   2  -5-30.9209 223.166   4
 -10  -2  -5 29.1428 208.791   4
  10  -2   5 32.4087 284.227   3
  10   2   5 408.053 292.610   3
  10   2   5-101.109 222.938   2
  11  -2   5 5562.10 692.183   3
 -11  -2  -5 5122.04 596.892   4
  11  -2   5 5207.82 638.797   2
  11   2   5 4798.24 659.848   3
 -11   2  -5 5477.75 651.522   4
  11   2   5 5086.31 586.684   2
  12   2   5 2599.11 547.891   3
  12  -2   5 2738.20 370.636   1
  12  -2   5 2239.24 464.319   2
 -12   2  -5 2155.51 480.041   4
 -12  -2  -5 2672.81 477.736   4
  12  -2   5 2210.20 442.793   3
  13  -2   5 74294.1 2793.43   2
 -13   2  -5 70205.7 2667.14   4
  13   2   5 79644.3 2993.96   3
 -13  -2  -5 71759.8 2624.06   4
  13  -2   5 73225.9 2820.97   3
  14  -2   5 14822.5 1213.46   2
 -14   2  -5 16629.8 1256.53   4
 -14  -2  -5 16364.3 1203.85   4
  14  -2   5 15027.1 1241.90   3
 -15   2  -5-96.7699 364.618   4
  15  -2   5-107.654 321.741   2
  16  -2   5-135.228 304.211   2
 -16   2  -5-391.230 363.147   4
  17  -2   5 36755.4 2122.70   2
 -17   2  -5 37457.0 2131.39   4
  18  -2   5 1613.93 571.289   2
 -18   2  -5 718.188 407.306   4
 -19   2  -5 2460.32 665.768   4
  23  -3  -5-371.839 492.259   1
  22  -3  -5 3329.30 694.476   1
 -22   3   5 2132.75 625.445   4
  21  -3  -5 1922.72 566.080   1
 -21   3   5 2340.09 673.566   4
  20  -3  -5 52453.5 2560.10   1
 -20   3   5 52071.0 2633.70   4
  19  -3  -5 2945.66 598.143   1
 -19   3   5 1842.90 544.633   4
  18  -3  -5 376.970 311.991   1
 -18   3   5 457.574 396.150   4
  17  -3  -5 2122.25 552.553   1
 -17   3   5 1751.95 498.034   4
 -16   3   5 510.868 334.703   4
  16  -3  -5 421.755 296.208   1
  16  -3  -5 560.525 336.864   2
 -15   3   5 15990.1 1163.62   4
  15  -3  -5 15548.7 1155.42   1
  15  -3  -5 15150.2 1136.02   2
  14  -3  -5 9760.86 885.928   1
 -14   3   5 8444.58 818.165   4
  14  -3  -5 8815.70 850.768   2
  13  -3  -5 60751.6 2264.91   1
  13  -3  -5 60100.9 2224.40   2
 -13   3   5 58361.2 2231.40   4
  12  -3  -5 3655.30 504.028   2
  12  -3  -5 3272.08 490.127   1
 -12   3   5 3333.47 507.687   4
  11  -3  -5 13076.8 898.232   2
  11  -3  -5 13549.8 918.053   1
 -11   3   5 13098.2 877.646   4
  10  -3  -5 5186.43 548.072   2
  10  -3  -5 5244.80 559.959   1
   9  -3  -5 49422.7 1669.94   2
   9  -3  -5 48502.1 1750.72   1
   8  -3  -5 55756.9 1718.35   2
   8  -3  -5 54499.3 1828.53   1
   7  -3  -5 8237.70 540.284   2
   7  -3  -5 8130.08 602.582   1
   6  -3  -5 12496.9 629.126   2
   6  -3  -5 12788.2 729.038   1
   5  -3  -5 17435.3 684.502   2
   5  -3  -5 16801.0 455.643   5
   5   3  -5 16128.8 767.475   5
   4   3  -5 805233. 15178.2   5
  -4   3   5 820081. 15020.4   3
   4  -3  -5 842084. 14861.0   2
   3   3  -5 6132.86 463.840   5
  -3   3   5 5641.49 298.849   2
  -3  -3   5 6646.19 442.404   6
  -3   3   5 6144.30 260.335   5
  -3   3   5 6657.42 415.211   3
   3  -3  -5 5836.81 287.172   2
  -3   3   5 6740.50 455.414   6
  -2  -3   5 2512.53 278.821   6
   2   3  -5 2220.31 308.743   5
  -2   3   5 2842.15 293.397   6
  -2   3   5 2363.88 148.683   2
  -2   3   5 2927.20 284.921   3
  -1   3   5 136503. 2934.88   3
  -1   3   5 132849. 2934.37   6
   1   3  -5 126042. 3047.68   5
  -1  -3   5 131487. 2929.15   6
  -1  -3   5 129903. 2991.47   3
   0   3   5 74543.6 1944.25   3
   0  -3   5 76812.4 1997.40   3
   1   3   5 286512. 5717.09   3
   1   3   5 285058. 5161.04   4
   1  -3   5 280052. 5644.37   2
   1  -3   5 283169. 5712.90   3
   2  -3   5 149776. 3471.23   3
  -2  -3  -5 154764. 2943.39   2
   2   3   5 152326. 3522.42   3
   2   3   5 157028. 3035.31   4
   2  -3   5 153900. 3438.04   2
   3   3   5 194.386 174.583   3
   3  -3   5 148.700 157.576   3
  -3  -3  -5 408.340 93.4250   2
   4  -3   5 201777. 4547.32   2
   4  -3   5 203362. 4545.54   3
   4   3   5 212741. 4679.36   3
  -4  -3  -5 212769. 4155.77   2
   5  -3   5 176102. 4232.45   2
   5  -3   5 178143. 4256.97   3
   5  -3   5 193647. 3518.14   1
   5   3   5 193914. 4435.76   3
   6  -3   5 1714.10 350.646   2
   6  -3   5 1907.39 341.307   3
   6  -3   5 1997.65 178.565   1
   6   3   5 1794.21 328.801   3
   7   3   5 19301.0 1118.21   3
   7  -3   5 19771.4 693.000   1
   7  -3   5 17985.3 1018.54   3
   7  -3   5 18325.9 1046.33   2
   8   3   5 16694.7 1085.78   3
   8  -3   5 19191.2 729.369   1
   8  -3   5 16296.1 1013.78   3
   8  -3   5 15818.7 994.341   2
   9  -3   5 168977. 4518.16   2
   9  -3   5 178299. 4553.42   3
   9   3   5 174507. 4697.35   3
  10  -3   5 8411.42 550.068   1
  10   3   5 6925.71 786.693   3
  10  -3   5 7810.11 793.646   2
  10  -3   5 9579.65 866.711   3
  11  -3   5 35268.6 1267.09   1
  11  -3   5 33149.9 1663.96   3
  11   3   5 32618.9 1731.67   3
  11  -3   5 31799.5 1632.66   2
  12  -3   5 172.123 247.175   2
  12  -3   5-176.501 318.775   3
 -12   3  -5 137.922 277.616   4
  12   3   5 432.896 380.361   3
  13  -3   5 61354.4 2516.25   3
 -13   3  -5 58089.6 2402.48   4
  13  -3   5 56797.2 2424.17   2
  14  -3   5 7742.38 886.358   2
  14  -3   5 7748.72 920.656   3
 -14   3  -5 7892.14 879.910   4
 -15   3  -5 441.925 341.123   4
  15  -3   5 1261.90 473.768   2
 -16   3  -5 1441.86 505.497   4
  16  -3   5 2267.24 558.174   2
 -17   3  -5 563.723 383.348   4
  17  -3   5 2432.52 581.904   2
 -18   3  -5 24877.2 1784.82   4
  18  -3   5 21396.9 1697.42   2
 -19   3  -5 11721.6 1263.16   4
  23  -4  -5 3883.61 763.519   1
  22  -4  -5 248.274 441.259   1
 -21   4   5 1721.17 493.113   4
  21  -4  -5 2424.13 569.134   1
  20  -4  -5-161.118 389.385   1
 -20   4   5 43.2084 376.421   4
  19  -4  -5 24314.8 1654.38   1
 -19   4   5 21854.6 1625.95   4
 -18   4   5 2103.69 560.805   4
  18  -4  -5 2284.41 565.054   1
  18  -4  -5 1909.82 480.148   2
  17  -4  -5 12505.9 1133.56   2
 -17   4   5 12800.1 1146.23   4
  17  -4  -5 13227.9 1139.42   1
  16  -4  -5 7948.64 836.050   1
  16  -4  -5 6940.78 822.581   2
 -16   4   5 6497.88 784.196   4
  15  -4  -5 4019.51 620.688   1
  15  -4  -5 2895.22 535.495   2
 -15   4   5 4827.91 662.376   4
  14  -4  -5 3404.51 551.139   1
 -14   4   5 2771.01 496.595   4
  14  -4  -5 2817.66 488.633   2
  13  -4  -5 54608.8 2151.97   2
  13  -4  -5 55951.5 2194.96   1
  12  -4  -5 79270.8 2604.33   2
  12  -4  -5 84218.2 2702.64   1
  11  -4  -5 15956.9 1002.58   2
  11  -4  -5 18409.0 1090.25   1
  10  -4  -5 41135.6 1662.24   1
  10  -4  -5 40849.0 1580.82   2
   9  -4  -5 10343.4 754.582   1
   9  -4  -5 10015.9 700.856   2
   8  -4  -5 1337.88 269.134   1
   8  -4  -5 1636.49 289.650   2
   7  -4  -5 221180. 4980.13   1
   7  -4  -5 232727. 4788.97   2
   6  -4  -5 7492.29 492.258   2
   5   4  -5 76513.3 2098.37   5
   5  -4  -5 79157.8 1913.15   2
   4   4  -5 110168. 2702.37   5
  -4   4   5 110331. 2416.25   2
  -4   4   5 108363. 2438.09   3
   4  -4  -5 113711. 2386.90   2
  -3   4   5 161456. 3391.48   6
  -3   4   5 148958. 2885.20   5
   3   4  -5 159696. 3537.46   5
   3  -4  -5 159832. 3071.94   2
  -3   4   5 160142. 3288.85   3
  -3  -4   5 157484. 3361.25   6
  -3   4   5 165596. 3117.87   2
  -2   4   5 73790.3 1798.85   3
   2   4  -5 74413.2 2014.94   5
  -2   4   5 68914.6 1477.57   2
   2  -4  -5 73925.9 1465.55   2
  -2  -4   5 72863.3 1828.19   6
  -1   4   5 21593.9 834.282   3
  -1  -4   5 21759.7 848.038   6
  -1   4   5 21414.3 855.252   6
   1   4  -5 22199.0 984.469   5
  -1  -4   5 21712.8 909.784   3
   0   4   5 13121.2 653.819   3
   0  -4   5 13999.1 709.975   3
   1   4   5 86343.0 2217.15   3
   1  -4   5 82197.7 2208.59   2
   1  -4   5 86079.1 2207.19   3
   2  -4   5 150086. 3488.40   3
   2   4   5 152351. 3078.82   4
   2  -4   5 153016. 3523.87   2
   2   4   5 151921. 3519.65   3
  -2  -4  -5 157934. 2932.10   2
   3  -4   5 293.702 211.755   2
   3  -4   5 230.199 186.360   3
   3   4   5 346.892 192.337   3
  -3  -4  -5 435.359 109.661   2
   4  -4   5 42896.8 1474.83   3
   4  -4   5 40494.4 1508.75   2
  -4  -4  -5 41900.2 1171.81   2
   4   4   5 42606.3 1550.66   3
   5   4   5 166928. 3981.59   3
   5  -4   5 162465. 3941.46   2
   5  -4   5 158698. 3814.43   3
   6  -4   5 15554.3 885.176   3
   6   4   5 14701.8 942.189   3
   6  -4   5 14668.8 917.062   2
   7  -4   5 95212.2 2802.31   2
   7   4   5 94470.5 2854.70   3
   7  -4   5 92222.0 2684.96   3
   8   4   5 1414.05 346.067   3
   8  -4   5 1062.24 174.490   1
   8  -4   5 1085.30 313.827   2
   8  -4   5 950.360 306.344   3
   9   4   5 4494.15 656.623   3
   9  -4   5 4697.94 584.811   3
   9  -4   5 4579.08 362.267   1
   9  -4   5 4002.45 557.001   2
  10  -4   5 193295. 4939.08   3
  10   4   5 200717. 5183.32   3
  10  -4   5 189971. 5022.85   2
  10  -4   5 203317. 4211.52   1
  11  -4   5 336.640 269.387   3
  11   4   5 227.884 340.800   3
  11  -4   5 138.009 314.475   2
  12  -4   5 27359.6 1530.75   3
  12   4   5 28870.0 1688.51   3
  12  -4   5 26012.3 1547.30   2
  13  -4   5 1764.13 460.181   2
  13  -4   5 1011.68 367.618   3
 -13   4  -5 1014.62 409.826   4
  14  -4   5 2228.42 520.214   3
  14  -4   5 2691.43 528.187   2
 -14   4  -5 1427.94 466.467   4
  15  -4   5 27512.3 1761.70   2
 -15   4  -5 28112.2 1738.78   4
  16  -4   5 44.6106 319.472   2
 -16   4  -5-313.949 452.488   4
  17  -4   5 9492.16 1093.11   2
 -17   4  -5 8489.47 1048.29   4
  18  -4   5 170.359 360.630   2
 -18   4  -5 299.930 454.019   4
 -19   4  -5 1416.39 539.881   4
  23  -5  -5 5575.27 915.768   1
  22  -5  -5 3023.36 716.167   1
  21  -5  -5 15.5912 328.019   1
 -21   5   5 1219.88 578.572   4
  20  -5  -5 4938.75 824.544   1
 -20   5   5 6063.46 932.892   4
  19  -5  -5 15216.8 1310.43   1
  19  -5  -5 12148.2 1245.53   2
 -19   5   5 13009.4 1272.44   4
  18  -5  -5 1227.82 481.597   1
  18  -5  -5 280.642 418.613   2
 -18   5   5 908.113 478.212   4
  17  -5  -5-244.997 477.629   2
 -17   5   5 203.110 354.847   4
  17  -5  -5-53.6008 370.507   1
  16  -5  -5 12241.5 1049.15   1
  16  -5  -5 11825.5 1074.03   2
 -16   5   5 11735.4 1077.27   4
  15  -5  -5 17738.2 1240.46   2
  15  -5  -5 17072.2 1221.45   1
 -15   5   5 17188.9 1260.61   4
  14  -5  -5 29208.1 1582.98   2
  14  -5  -5 27813.0 1562.21   1
  13  -5  -5 5065.67 664.193   2
  13  -5  -5 5827.44 667.373   1
  12  -5  -5 5780.51 658.969   2
  12  -5  -5 5399.94 636.330   1
  11  -5  -5 30586.4 1453.15   2
  11  -5  -5 37195.4 1615.10   1
  10  -5  -5 32264.7 1473.32   1
  10  -5  -5 31841.9 1423.19   2
   9  -5  -5 38.2141 178.222   2
   8  -5  -5 18673.8 951.925   2
   7  -5  -5 35200.9 1278.91   2
   6  -5  -5 68855.6 1869.37   2
   5  -5  -5 17644.3 747.069   2
   5   5  -5 17800.1 891.958   5
  -5   5   5 18178.3 686.411   3
   4   5  -5 9144.68 630.086   5
   4  -5  -5 8522.96 458.275   2
  -4   5   5 8219.47 441.190   3
  -4   5   5 7543.54 445.276   2
  -3   5   5 20738.6 822.852   6
  -3   5   5 20800.0 750.288   3
  -3  -5   5 19958.2 809.424   6
   3  -5  -5 20752.9 689.668   2
   3   5  -5 20918.9 961.305   5
  -3   5   5 20661.9 699.602   2
  -2   5   5 1641.31 211.868   3
   2  -5  -5 1710.80 159.954   2
  -2   5   5 1388.87 215.793   6
  -2  -5   5 2026.63 252.231   6
   2   5  -5 1777.91 308.957   5
  -1   5   5 244.379 143.717   3
  -1  -5   5-22.4090 120.411   6
  -1  -5   5 15.6068 147.588   3
   0   5   5 23883.2 911.367   3
   0   5  -5 23166.4 1063.78   5
   0  -5  -5 21025.2 551.209   2
   0  -5   5 23924.2 960.073   3
   1  -5   5 1638.96 259.556   3
   1   5   5 1680.17 266.363   3
   2  -5   5 1013.56 224.462   3
   2   5   5 1049.30 247.481   3
  -2  -5  -5 1115.62 127.740   2
   2  -5   5 980.671 234.817   2
  -3  -5  -5 861.258 130.868   2
   3  -5   5 1695.85 358.819   2
   3  -5   5 1129.15 261.759   3
   3   5   5 1199.59 283.385   3
   4  -5   5 3995.37 464.186   2
  -4  -5  -5 4213.59 306.887   2
   4   5   5 3539.65 435.360   3
   4  -5   5 4705.16 460.773   3
   5  -5   5 907.945 312.802   2
   5   5   5 1398.13 322.086   3
   5  -5   5 711.927 217.107   3
   6  -5   5 6193.00 608.615   2
   6  -5   5 6513.24 568.838   3
   6   5   5 6497.56 622.673   3
   7  -5   5 1101.00 293.406   3
   7  -5   5 1003.83 269.514   2
   7   5   5 1604.99 371.221   3
   8  -5   5 1207.09 319.656   3
   8   5   5 294.079 265.331   3
   8  -5   5 805.294 266.425   2
   9  -5   5-239.702 267.994   3
   9  -5   5-68.2593 318.484   2
   9   5   5 12.2365 297.227   3
  10  -5   5 5482.72 638.041   3
  10  -5   5 5339.34 671.037   2
  10   5   5 5922.75 737.010   3
  11  -5   5 34998.0 1695.82   3
  11   5   5 35853.8 1880.41   3
  11  -5   5 34388.6 1781.59   2
  12  -5   5 40.7840 338.654   2
  12  -5   5 438.043 289.686   3
  13  -5   5 185.769 341.137   2
  13  -5   5-849.717 500.286   3
  14  -5   5 11066.4 1029.32   3
  14  -5   5 12092.2 1125.78   2
 -15   5  -5 11345.1 1118.49   4
  15  -5   5 13350.5 1225.79   2
  16  -5   5 604.333 360.538   2
 -16   5  -5 339.511 351.165   4
 -17   5  -5 1112.86 433.083   4
  17  -5   5 920.392 399.936   2
 -18   5  -5 1542.34 575.232   4
  18  -5   5 337.229 410.468   2
 -19   5  -5 5102.85 926.329   4
  21  -6  -5-180.217 359.505   1
 -21   6   5 1183.97 561.178   4
  21  -6  -5 346.612 446.102   2
  20  -6  -5 4450.89 797.861   2
  20  -6  -5 3718.85 748.747   1
 -20   6   5 2375.09 652.530   4
  19  -6  -5 7009.08 979.361   2
 -19   6   5 8243.53 1047.68   4
  19  -6  -5 9577.52 1068.87   1
  18  -6  -5 18669.9 1459.65   2
 -18   6   5 20632.4 1543.38   4
  18  -6  -5 21398.2 1521.63   1
  17  -6  -5-240.482 292.788   1
  17  -6  -5 43.8235 468.872   2
 -17   6   5 241.178 433.002   4
  16  -6  -5 2976.76 565.112   1
  16  -6  -5 2538.57 519.942   2
 -16   6   5 2187.69 526.588   4
  15  -6  -5 751.628 362.091   1
  15  -6  -5 233.994 322.440   2
  14  -6  -5 4831.58 673.941   2
  14  -6  -5 6929.63 784.106   1
  13  -6  -5 60534.1 2364.67   2
  13  -6  -5 65276.1 2435.51   1
  12  -6  -5 68162.7 2432.81   2
  11  -6  -5 33767.8 1543.47   2
  10  -6  -5 76298.6 2431.89   2
   9  -6  -5 7672.20 643.724   2
   8  -6  -5 8179.90 634.466   2
   7  -6  -5 71491.9 2069.66   2
   6  -6  -5 16021.0 788.407   2
  -6   6   5 15325.1 599.483   3
   5  -6  -5 88940.4 2198.42   2
  -5   6   5 88101.9 1959.80   3
   5   6  -5 84525.3 2429.36   5
  -4   6   5 209.445 131.856   6
   4   6  -5 248.284 208.518   5
   4  -6  -5 122.806 122.166   2
  -4   6   5 168.302 110.186   3
  -3   6   5 45551.8 1269.51   3
  -3   6   5 45881.7 1383.23   6
  -3  -6   5 48037.0 1388.98   6
   3   6  -5 49620.6 1647.58   5
   3  -6  -5 45969.4 1275.58   2
   3  -6  -5 48871.8 1300.23   3
   2  -6  -5 12190.5 494.450   2
  -2   6   5 10853.5 542.994   3
  -2  -6   5 11831.6 595.769   6
  -2   6   5 12819.8 616.684   6
   2   6  -5 11182.4 733.592   5
   1   6  -5 8352.58 661.133   5
  -1   6   5 8600.35 504.449   3
   1  -6  -5 9923.30 406.802   2
   0   6   5 1038.93 205.828   3
   0   6  -5 608.803 261.660   5
   0  -6  -5 713.418 111.007   2
   0  -6   5 701.773 194.015   3
   1  -6   5 47082.5 1655.61   2
   1  -6   5 46868.6 1510.38   3
   1   6   5 49176.8 1521.66   3
   2  -6   5 129468. 3075.73   3
   2   6   5 127420. 3111.44   3
   2  -6   5 130941. 3301.01   2
   3  -6   5 35844.8 1294.86   3
  -3  -6  -5 34717.8 984.845   2
  -3   6  -5 36177.2 872.445   1
   3   6   5 35148.1 1362.67   3
   3  -6   5 36050.5 1463.37   2
   4  -6   5 71212.3 2074.94   3
   4   6   5 72751.9 2212.79   3
   4  -6   5 71987.0 2291.59   2
   5  -6   5 200604. 4846.17   2
   5  -6   5 206869. 4592.25   3
   5   6   5 209530. 4824.16   3
   6  -6   5 5815.75 628.740   2
   6   6   5 5744.98 594.219   3
   6  -6   5 5994.29 546.227   3
   7  -6   5 26012.7 1369.54   2
   7  -6   5 26646.7 1241.86   3
   7   6   5 29137.8 1437.60   3
   8  -6   5 8615.18 812.641   2
   8   6   5 9408.69 827.220   3
   8  -6   5 8804.66 720.150   3
   9  -6   5 7382.88 686.888   3
   9  -6   5 6392.53 734.078   2
   9   6   5 6270.37 729.033   3
  10  -6   5 156913. 4125.72   3
  10   6   5 157159. 4427.69   3
  10  -6   5 152099. 4384.75   2
  11  -6   5 21994.9 1438.17   2
  11  -6   5 22169.6 1316.26   3
  12  -6   5 1284.81 480.708   2
  12  -6   5 2464.90 484.808   3
  13  -6   5 6743.96 779.695   3
  13  -6   5 7372.95 903.548   2
  14  -6   5 10854.1 1004.55   3
  14  -6   5 10934.4 1105.48   2
  15  -6   5 6705.83 915.972   2
 -16   6  -5 13236.1 1271.93   4
  16  -6   5 13051.7 1288.92   2
  17  -6   5 469.522 461.826   2
 -17   6  -5-228.246 376.937   4
  18  -6   5 1145.15 549.719   2
 -18   6  -5 2032.60 638.895   4
 -21   7   5 4484.92 857.139   4
  21  -7  -5 4193.10 855.136   2
  20  -7  -5 33393.1 2130.57   2
 -20   7   5 36891.0 2254.96   4
  19  -7  -5-225.344 503.381   2
 -19   7   5-35.5316 437.778   4
  18  -7  -5 5974.59 886.548   2
 -18   7   5 6333.45 923.570   4
  17  -7  -5 11200.8 1124.77   2
  16  -7  -5 13217.5 1178.66   2
  15  -7  -5 40079.4 2025.07   2
  14  -7  -5 1217.07 452.517   2
  13  -7  -5 14947.8 1100.87   2
  12  -7  -5 9596.67 855.618   2
  11  -7  -5 114136. 3326.12   2
  10  -7  -5 362.148 259.152   2
   9  -7  -5 53133.0 1302.74   5
   9  -7  -5 52136.9 1870.90   2
   8  -7  -5 1639.29 142.855   5
   8  -7  -5 1382.10 289.253   2
   7  -7  -5 72854.3 2147.09   2
  -7   7   5 73463.5 1687.73   3
  -6   7   5 56420.8 1359.31   3
   6   7  -5 57428.7 1935.40   5
   6  -7  -5 56621.5 1753.20   2
  -5   7   5 38617.1 1031.91   3
   5   7  -5 38033.7 1497.11   5
   5  -7  -5 40235.7 1325.76   2
  -4  -7   5 75091.7 1952.35   6
   4  -7  -5 77632.5 1985.77   2
  -4   7   5 78807.1 1985.02   6
  -4   7   5 79551.7 1769.15   3
   4   7  -5 76103.8 2277.33   5
   3  -7  -5 72374.1 1780.63   2
  -3   7   5 65124.7 1642.88   3
   3  -7  -5 67062.3 1659.78   3
   3   7  -5 71730.9 2149.70   5
  -3   7   5 71899.1 1821.13   6
  -3  -7   5 71470.5 1805.62   6
   2  -7  -5 4293.74 320.462   2
  -2   7   5 4076.79 325.215   3
   2   7  -5 4734.04 507.255   5
  -2  -7   5 3279.46 308.265   6
  -2   7   5 3628.09 325.728   6
  -1   7   5 14429.1 661.001   3
   1   7  -5 13920.9 865.372   5
   1  -7  -5 13309.9 556.501   2
   0   7  -5 60264.4 1990.04   5
   0  -7  -5 60668.3 1455.29   2
   0   7   5 58830.2 1674.57   3
   0  -7   5 58348.0 1745.66   3
   1   7   5 115748. 2792.34   3
   1  -7   5 117239. 2819.37   3
   1  -7   5 111896. 3045.06   2
   2   7   5 107535. 2702.70   3
   2  -7   5 100789. 2873.93   2
   2  -7   5 102419. 2598.80   3
   3  -7   5 11251.3 679.286   3
   3  -7   5 11463.4 828.213   2
  -3   7  -5 10604.8 461.391   1
   4  -7   5 8017.20 589.676   3
   4  -7   5 7633.51 703.751   2
   4   7   5 7235.66 626.183   3
  -4   7  -5 7380.45 361.775   1
   5  -7   5 30845.6 1483.82   2
   5   7   5 34691.2 1479.77   3
   5  -7   5 34557.1 1331.69   3
   6  -7   5 1588.68 367.253   2
   6  -7   5 1500.08 297.759   3
   6   7   5 1758.99 371.385   3
   7  -7   5 1258.45 277.146   3
   7   7   5 1424.20 366.996   3
   7  -7   5 1105.24 346.622   2
   8  -7   5 16366.2 1154.51   2
   8  -7   5 15519.0 945.173   3
   8   7   5 13907.5 1040.99   3
   9  -7   5 19671.2 1300.17   2
   9  -7   5 19156.6 1105.28   3
   9   7   5 19672.2 1284.95   3
  10  -7   5 5183.16 608.334   3
  10  -7   5 4493.96 675.970   2
  11  -7   5 4383.15 584.041   3
  11  -7   5 4478.89 695.084   2
  12  -7   5 33942.9 1692.16   3
  12  -7   5 35639.1 1949.92   2
  13  -7   5 28818.6 1595.24   3
  13  -7   5 28312.7 1796.44   2
  14  -7   5 19965.3 1539.37   2
  14  -7   5 17960.2 1299.39   3
  15  -7   5 897.610 484.367   2
  16  -7   5 633.238 411.874   2
  17  -7   5 1818.06 619.392   2
 -17   7  -5 2575.17 715.632   4
 -18   7  -5 63788.3 3093.88   4
  20  -8  -5 10385.6 1229.82   2
 -20   8   5 10298.8 1246.99   4
  19  -8  -5 1765.53 611.088   2
 -19   8   5 1059.01 461.443   4
  18  -8  -5 5221.83 841.151   2
  17  -8  -5 28669.2 1829.74   2
  16  -8  -5 89819.3 3325.39   2
  15  -8  -5 16201.2 1270.87   2
  14  -8  -5 267.934 310.236   2
  13  -8  -5 71387.1 2659.13   2
  12  -8  -5 56495.4 2231.78   2
  11  -8  -5 20434.6 1222.57   2
  10  -8  -5 59294.7 2154.53   2
   9  -8  -5 1604.54 166.721   5
   9  -8  -5 2049.76 389.108   2
  -9   8   5 2168.70 209.923   3
   8  -8  -5 156618. 3020.15   5
  -8   8   5 165224. 3197.74   3
  -7   8   5 623.345 113.643   3
   7  -8  -5 491.864 189.249   2
  -6   8   5 4837.70 269.918   3
   6  -8  -5 5367.27 499.641   2
   6   8  -5 5175.20 548.342   5
  -5   8   5 22999.1 681.776   3
   5  -8  -5 22239.7 984.388   2
   5   8  -5 23045.7 1162.95   5
   4  -8  -5 3197.01 337.506   2
  -4   8   5 3212.70 315.724   6
  -4   8   5 2967.13 231.481   3
  -4  -8   5 2860.21 293.618   6
   4   8  -5 2605.91 408.920   5
  -4   8   5 2638.74 158.917   5
   3  -8  -5 54468.4 1554.89   2
   3   8  -5 53588.1 1859.06   5
  -3   8   5 54645.5 1238.44   5
  -3   8   5 56549.2 1378.70   3
   3  -8  -5 57073.9 1391.92   3
  -3  -8   5 53489.7 1493.14   6
   2   8  -5 71387.7 2246.27   5
  -2   8   5 72647.3 1769.71   3
  -2   8   5 68833.4 1830.48   6
   2  -8  -5 72509.8 1844.39   2
  -2  -8   5 72801.9 1844.24   6
  -1   8   5 9977.80 544.728   3
   1  -8  -5 9283.36 502.655   2
   0   8   5 3954.65 373.406   3
   0   8  -5 3038.86 451.173   5
   0  -8   5 3360.89 374.784   3
   0  -8  -5 3856.81 321.748   2
   1  -8   5 93374.3 2425.29   3
   1  -8   5 91035.8 2722.47   2
   1   8   5 97052.2 2441.22   3
  -1   8  -5 91445.2 2737.06   5
   2  -8   5 13905.6 923.261   2
   2   8   5 13530.6 781.461   3
   2  -8   5 13402.8 745.357   3
   3  -8   5 5958.41 497.181   3
   3  -8   5 6416.59 646.182   2
   3   8   5 6533.40 560.994   3
   4  -8   5 10883.6 678.164   3
   4   8   5 9955.73 734.318   3
  -4   8  -5 9306.06 468.295   1
   4  -8   5 10385.5 835.954   2
   5  -8   5 19368.8 969.961   3
   5   8   5 20730.4 1133.02   3
   5  -8   5 19830.7 1207.32   2
   6  -8   5 21503.4 1052.32   3
   6   8   5 23566.5 1261.42   3
   7  -8   5 7309.29 785.139   2
   7   8   5 8668.29 803.311   3
   7  -8   5 7912.34 648.832   3
   8  -8   5 99402.5 3292.21   2
   8  -8   5 107099. 2942.02   3
   8   8   5 103062. 3254.56   3
   9  -8   5 4318.25 661.397   2
   9  -8   5 3472.53 481.895   3
  10  -8   5 635.220 297.025   3
  10  -8   5 140.641 307.382   2
  11  -8   5 4065.79 687.569   2
  11  -8   5 5921.73 657.698   3
  12  -8   5 7307.41 778.769   3
  12  -8   5 7019.04 904.066   2
  13  -8   5 93329.7 3550.23   2
  13  -8   5 93003.3 3133.55   3
  14  -8   5 5324.98 703.359   3
  14  -8   5 4608.10 838.708   2
  15  -8   5-554.911 468.861   2
  16  -8   5 7955.39 1046.78   2
  17  -8   5 48044.3 2665.10   2
 -17   8  -5 48022.8 2621.30   4
 -20   9   5-453.039 541.405   4
  20  -9  -5 749.146 420.198   2
  19  -9  -5 20520.9 1658.48   2
 -19   9   5 19182.4 1596.81   4
  18  -9  -5 1163.56 475.256   2
  17  -9  -5 20344.6 1567.84   2
  16  -9  -5 20237.0 1515.58   2
  15  -9  -5 2284.84 526.285   2
  14  -9  -5 14627.8 1195.42   2
  13  -9  -5 2613.58 514.357   2
  12  -9  -5 4970.64 674.427   2
  11  -9  -5 6699.84 716.878   2
  10  -9  -5 10138.1 834.622   2
   9  -9  -5 17595.3 1067.71   2
  -9   9   5 15101.4 520.650   3
  -8   9   5 62032.8 1320.11   3
  -8   9   5 62581.5 1331.92   3
  -7   9   5 13330.3 396.260   3
   7  -9  -5 17820.1 982.615   2
  -6   9   5 845.413 92.0594   3
   6   9  -5 675.450 295.725   5
   6  -9  -5 630.490 233.459   2
  -5   9   5 101068. 2420.17   6
  -5   9   5 96556.7 1974.94   3
   5  -9  -5 101085. 2638.38   2
   5   9  -5 103298. 2909.67   5
   4  -9  -5 4660.54 438.701   2
  -4   9   5 4417.81 371.861   6
   4   9  -5 5073.44 553.590   5
  -4   9   5 4428.82 253.353   5
  -4   9   5 4772.73 275.285   3
  -4  -9   5 4815.86 379.203   6
   3  -9  -5 77344.0 2078.02   2
   3  -9  -5 74776.4 1771.60   3
  -3   9   5 71237.5 1904.01   6
  -3   9   5 80097.5 1737.89   5
  -3   9   5 78365.4 1773.43   3
   3   9  -5 77256.5 2414.42   5
  -3  -9   5 78659.2 1939.83   6
   2   9  -5 58134.5 2049.64   5
  -2   9   5 59548.9 1542.43   3
   2  -9  -5 59112.2 1683.61   2
  -1   9   5 36301.6 1166.15   3
   1   9  -5 34312.3 1514.27   5
   1  -9  -5 35483.0 1188.42   2
   0   9  -5 171798. 4329.57   5
   0  -9   5 172848. 3934.32   3
   0   9   5 175187. 3823.19   3
   0  -9  -5 182106. 3776.80   2
   1   9   5 765.065 210.491   3
   1  -9   5 1136.29 353.341   2
   1  -9   5 544.173 195.889   3
   2   9   5 79033.2 2223.59   3
   2  -9   5 73900.6 2513.50   2
   2  -9   5 75811.0 2128.17   3
   3   9   5 5672.34 538.324   3
   3  -9   5 5860.20 660.335   2
   3  -9   5 6417.48 520.063   3
   4  -9   5-326.503 307.919   2
   4  -9   5-239.143 228.613   3
   4   9   5 263.251 198.191   3
   5  -9   5 86308.6 2400.15   3
   5  -9   5 88349.5 2898.23   2
   5   9   5 84550.3 2636.83   3
   6  -9   5 4961.97 658.250   2
   6  -9   5 4593.29 494.399   3
   6   9   5 3446.75 486.780   3
   7  -9   5 12053.6 1024.24   2
   7  -9   5 10890.1 760.905   3
   7   9   5 10820.7 897.053   3
   8  -9   5 800.374 269.508   3
   8  -9   5 227.359 336.260   2
   9  -9   5 40211.5 1638.06   3
   9  -9   5 38494.0 1978.54   2
  10  -9   5 6072.51 787.048   2
  10  -9   5 5866.88 620.390   3
  11  -9   5 4380.59 716.045   2
  11  -9   5 4258.63 565.401   3
  12  -9   5 741.061 331.610   3
  12  -9   5 1105.32 444.082   2
  13  -9   5 816.886 441.234   2
  14  -9   5 26097.0 1861.37   2
  15  -9   5 3682.40 777.773   2
  16  -9   5 13241.8 1381.26   2
 -20  10   5 4275.97 800.257   4
  20 -10  -5 3702.92 776.977   2
  19 -10  -5-1718.22 591.022   2
  18 -10  -5 509.183 468.816   2
  17 -10  -5 389.571 401.261   2
  16 -10  -5-406.543 470.906   2
  15 -10  -5 2508.74 555.531   2
  14 -10  -5 675.828 400.983   2
  13 -10  -5 620.813 317.039   2
  12 -10  -5 3699.65 581.271   2
  11 -10  -5 17494.4 1197.29   2
  10 -10  -5 60253.8 2295.56   2
   9 -10  -5 1334.85 353.397   2
   8 -10  -5 196.305 244.217   2
   7 -10  -5 38216.7 1558.89   2
   7  10  -5 34019.0 1596.54   5
   6 -10  -5 63244.6 2070.52   2
   6  10  -5 64009.1 2247.57   5
   5 -10  -5 35927.7 1393.31   2
  -5  10   5 31211.3 721.639   3
   5  10  -5 38547.7 1602.15   5
  -5  10   5 34246.3 1147.30   6
  -5 -10   5 34395.2 1142.55   6
  -4 -10   5 1255.37 204.117   6
  -4  10   5 931.097 143.445   5
  -4  10   5 1334.60 217.502   6
   4  10  -5 935.536 288.605   5
  -4  10   5 987.288 121.217   3
   4 -10  -5 645.900 225.380   2
  -3  10   5 10056.4 541.842   6
  -3 -10   5 9418.40 529.469   6
  -3  10   5 9564.18 466.065   5
  -3  10   5 10417.0 460.880   3
   3 -10  -5 8842.64 611.780   2
   3  10  -5 8627.76 744.999   5
   3 -10  -5 8859.16 436.760   3
  -2  10   5 91400.5 2113.37   3
   2  10  -5 86578.4 2746.89   5
   2 -10  -5 93115.0 2400.57   2
  -1  10   5 55941.6 1563.46   3
   1 -10  -5 54636.2 1656.94   2
   1  10  -5 54949.3 2040.66   5
   0 -10   5 6392.36 529.734   3
   0  10  -5 6640.96 688.648   5
   0  10   5 7625.22 532.349   3
   0 -10  -5 6894.46 507.708   2
   1  10   5 18967.5 908.647   3
  -1  10  -5 20607.0 1191.62   5
   1 -10   5 19572.0 1189.23   2
   1 -10   5 19678.4 935.881   3
   2  10   5 106877. 2803.36   3
   2 -10   5 102539. 3202.39   2
   2 -10   5 108327. 2722.21   3
   3 -10   5 68193.3 1992.44   3
   3  10   5 69884.4 2167.90   3
   3 -10   5 65223.5 2407.02   2
   4 -10   5 823.925 317.335   2
   4 -10   5 762.299 214.326   3
   4  10   5 679.152 263.596   3
   5 -10   5 34441.4 1345.25   3
   5  10   5 37269.9 1598.09   3
   5 -10   5 38304.1 1814.34   2
   6 -10   5 17012.3 1221.33   2
   6 -10   5 19006.4 976.080   3
   7 -10   5 40695.2 1535.37   3
   7 -10   5 39173.8 1945.84   2
   8 -10   5 3534.69 636.805   2
   8 -10   5 2841.55 425.571   3
   9 -10   5 8008.87 910.795   2
   9 -10   5 8673.70 717.968   3
  10 -10   5 7904.16 929.133   2
  10 -10   5 8505.80 736.327   3
  11 -10   5 12431.7 1175.26   2
  12 -10   5 106.678 342.208   2
  13 -10   5 8193.30 1069.43   2
  14 -10   5 3191.58 728.642   2
  15 -10   5-152.874 383.896   2
  16 -10   5 1871.78 670.052   2
  19 -11  -5 1735.60 530.189   2
  18 -11  -5 9843.74 1159.97   2
  17 -11  -5 14814.8 1366.64   2
  16 -11  -5 19020.0 1509.30   2
  15 -11  -5 3877.06 694.931   2
  14 -11  -5 2579.57 561.754   2
  13 -11  -5 1583.67 393.770   2
  12 -11  -5 2948.74 552.336   2
  11 -11  -5 12826.4 1061.86   2
  10 -11  -5 4659.84 607.810   2
   9 -11  -5 16562.2 1116.26   2
   8 -11  -5 21454.6 1227.32   2
   7 -11  -5 50550.7 1912.39   2
   7  11  -5 50133.1 2034.21   5
   6 -11  -5 35756.6 1522.94   2
   6  11  -5 33316.5 1600.61   5
   5 -11  -5 259.832 217.109   2
  -5 -11   5 70.0548 134.670   6
  -5  11   5 267.088 149.656   6
   5  11  -5 385.855 304.272   5
   4 -11  -5 6981.67 606.161   2
  -4 -11   5 7220.81 459.337   6
  -4  11   5 7242.99 468.299   6
   4  11  -5 7454.54 714.142   5
  -4  11   5 7061.96 401.604   5
  -3  11   5 2151.28 249.722   5
   3  11  -5 1775.77 391.529   5
   3 -11  -5 2424.48 357.583   2
   3 -11  -5 2432.34 226.506   3
  -2  11   5 48342.3 1426.28   5
   2 -11  -5 51614.6 1689.99   2
   2  11  -5 50849.1 1973.12   5
   1 -11  -5 161434. 3736.24   2
   1  11  -5 160715. 4215.74   5
   0 -11  -5 40546.8 1428.14   2
   0  11  -5 40407.5 1777.01   5
   0 -11   5 39937.7 1439.29   3
  -1  11  -5 18757.4 1184.79   5
   1 -11   5 19770.1 948.087   3
   1 -11   5 19266.4 1232.58   2
   2 -11   5 947.674 264.577   3
   2 -11   5 475.098 327.670   2
   3 -11   5 260.368 156.259   3
   3 -11   5 245.849 309.683   2
   4 -11   5 25849.9 1100.58   3
   4 -11   5 24035.0 1448.99   2
   5 -11   5 7019.76 809.291   2
   5 -11   5 8837.37 631.675   3
   6 -11   5 23276.9 1470.75   2
   6 -11   5 23228.7 1085.31   3
   7 -11   5 7598.77 883.533   2
   7 -11   5 7085.91 605.282   3
   8 -11   5 24498.5 1586.84   2
   8 -11   5 23038.6 1138.87   3
   9 -11   5 7656.57 928.743   2
  10 -11   5 2848.86 612.964   2
  11 -11   5 628.369 348.438   2
  12 -11   5 4860.07 801.062   2
  13 -11   5 4898.23 834.414   2
  14 -11   5 11400.0 1284.73   2
  15 -11   5 35867.6 2315.67   2
  19 -12  -5 1208.50 482.722   2
  18 -12  -5 6553.34 990.258   2
  17 -12  -5 6073.62 941.783   2
  16 -12  -5 7708.14 1015.31   2
  15 -12  -5 9171.52 1028.72   2
  14 -12  -5 32930.7 1917.88   2
  13 -12  -5 6566.63 844.759   2
  12 -12  -5 393.853 311.585   2
  11 -12  -5 4227.23 634.040   2
  10 -12  -5-177.119 296.297   2
   9 -12  -5 98108.2 3147.43   2
   8  12  -5 7940.52 842.842   5
   8 -12  -5 8039.78 785.503   2
   7  12  -5 639.126 321.784   5
   7 -12  -5 643.698 260.050   2
   6 -12  -5 5736.80 621.962   2
  -6 -12   5 4940.52 415.840   6
   6  12  -5 5597.97 673.077   5
  -6  12   5 4614.40 412.658   6
  -5  12   5 83389.0 2093.58   6
   5 -12  -5 82915.2 2581.16   2
   5  12  -5 79015.8 2744.08   5
  -5 -12   5 87810.0 2118.04   6
   4 -12  -5 9614.31 731.612   2
  -4  12   5 10179.2 527.949   5
  -4 -12   5 9811.24 530.796   6
   4  12  -5 8301.87 798.373   5
  -4  12   5 9301.16 527.318   6
  -3  12   5 61024.9 1664.60   5
   3  12  -5 65721.2 2344.94   5
   3 -12  -5 63694.8 2067.26   2
   2 -12  -5 3679.24 455.774   2
  -2  12   5 3501.55 353.317   5
   2  12  -5 2541.78 462.593   5
   1 -12  -5 28048.3 1219.53   2
   1  12  -5 26393.5 1431.68   5
   0  12  -5 57513.2 2257.07   5
   0 -12  -5 61921.1 1945.39   2
   0 -12   5 59965.3 1884.05   3
  -1  12  -5 66635.7 2459.44   5
   1 -12   5 66106.1 2536.30   2
   1 -12   5 67222.3 1999.93   3
   2 -12   5 8397.34 866.763   2
   2 -12   5 9338.32 641.095   3
   3 -12   5 29051.0 1178.05   3
   3 -12   5 26540.3 1546.65   2
   4 -12   5 16495.2 1236.82   2
   4 -12   5 15671.7 851.120   3
   5 -12   5 7479.16 860.517   2
   5 -12   5 8094.06 605.413   3
   6 -12   5 83661.7 3091.18   2
   6 -12   5 81263.3 2335.50   3
   7 -12   5 8433.41 957.741   2
   8 -12   5 17304.1 1388.73   2
   9 -12   5 10609.4 1107.89   2
  10 -12   5 15611.9 1364.06   2
  11 -12   5-487.858 563.173   2
  12 -12   5 5657.25 894.178   2
  13 -12   5 8235.47 1059.78   2
  14 -12   5 14555.1 1464.03   2
  15 -12   5-300.736 598.509   2
  18 -13  -5 2245.58 683.655   2
  17 -13  -5 207.708 434.325   2
  16 -13  -5 2000.46 610.708   2
  15 -13  -5 7848.52 1001.90   2
  14 -13  -5 6820.84 874.607   2
  13 -13  -5 33845.6 1929.46   2
  12 -13  -5 2875.90 633.931   2
  11 -13  -5 2195.57 487.981   2
  10 -13  -5 1016.44 379.132   2
   9 -13  -5 32489.9 1697.43   2
   9  13  -5 32485.7 1753.53   5
   8 -13  -5 20972.6 1290.20   2
   8  13  -5 19933.0 1346.69   5
  -7  13   5 3508.88 383.842   6
  -7 -13   5 3644.58 383.605   6
   7  13  -5 3501.42 629.413   5
   7 -13  -5 4058.93 577.527   2
  -6  13   5 7444.29 498.883   6
   6 -13  -5 6820.36 689.905   2
  -6 -13   5 8422.09 526.404   6
   6  13  -5 8029.24 812.854   5
   5  13  -5 5933.28 697.102   5
  -5 -13   5 6319.95 427.161   6
  -5  13   5 6501.81 438.686   6
   5 -13  -5 6145.64 641.091   2
   4  13  -5 129201. 3820.91   5
  -4  13   5 130113. 2964.50   5
   3  13  -5 4182.39 588.252   5
   3 -13  -5 3509.79 474.344   2
  -3  13   5 3406.62 349.477   5
   2 -13  -5 1308.15 311.824   2
   2  13  -5 774.674 342.594   5
  -2  13   5 1536.51 279.410   5
  -1  13   5 18336.8 897.465   5
   1  13  -5 17629.3 1194.39   5
   1 -13  -5 17806.3 1006.94   2
   0  13  -5 27947.1 1552.57   5
   0 -13  -5 27074.5 1267.12   2
   0 -13   5 29773.6 1236.68   3
   1 -13   5 76711.5 2933.69   2
  -1  13  -5 82409.6 2880.13   5
   1 -13   5 81803.5 2336.39   3
   2 -13   5 38654.0 1910.82   2
   2 -13   5 34215.9 1325.74   3
   3 -13   5 548.703 202.323   3
   3 -13   5-247.556 411.070   2
   4 -13   5 57433.3 1808.06   3
   4 -13   5 59408.5 2525.71   2
   5 -13   5 24974.0 1607.12   2
   6 -13   5 686.251 341.070   2
   7 -13   5 14200.6 1244.31   2
   8 -13   5 856.554 366.279   2
   9 -13   5 19942.4 1538.25   2
  10 -13   5 3836.38 705.366   2
  11 -13   5 10102.4 1188.35   2
  12 -13   5 6851.32 977.167   2
  13 -13   5 15596.5 1508.80   2
  14 -13   5-2041.69 660.593   2
  18 -14  -5 640.851 446.473   2
  17 -14  -5 38973.7 2353.57   2
  16 -14  -5 2255.57 612.603   2
  15 -14  -5 10731.4 1162.71   2
  14 -14  -5 35543.7 2078.38   2
  13 -14  -5 5132.25 781.035   2
  12 -14  -5 77195.6 3058.30   2
  11 -14  -5 6679.07 844.285   2
  10 -14  -5 2873.06 596.423   2
  10  14  -5 3906.74 683.385   5
   9  14  -5 67062.6 2681.68   5
   9 -14  -5 63887.7 2553.00   2
   8 -14  -5 13591.2 1071.83   2
   8  14  -5 15439.9 1194.11   5
   7 -14  -5 39642.8 1841.58   2
   7  14  -5 38683.2 1927.26   5
   6 -14  -5 7966.38 789.369   2
   6  14  -5 7318.15 834.391   5
   5  14  -5 894.740 385.544   5
   5 -14  -5 1911.82 443.065   2
   4 -14  -5 48005.0 1926.66   2
   4  14  -5 49603.5 2134.59   5
  -3  14   5 6388.77 494.517   5
   3  14  -5 6887.57 757.797   5
   3 -14  -5 7064.37 670.261   2
   2 -14  -5 359.631 240.227   2
  -2  14   5 38.9122 159.807   5
   1 -14  -5 3278.88 475.136   2
  -1  14   5 2360.84 355.188   5
   1  14  -5 2615.93 511.674   5
   0  14  -5 5101.63 711.245   5
   0 -14   5 5276.82 736.132   2
   0 -14  -5 5283.45 574.956   2
   0 -14   5 5411.24 517.322   3
  -1  14  -5 574.547 374.243   5
  -1 -14  -5 810.264 290.449   2
   1 -14   5 647.973 419.358   2
   1 -14   5 361.616 195.884   3
   2 -14   5 9034.57 967.449   2
   2 -14   5 9237.76 647.030   3
   3 -14   5 93.2830 356.866   2
   4 -14   5 38269.5 2035.95   2
   5 -14   5 4390.61 715.010   2
   6 -14   5 3538.46 639.734   2
   7 -14   5 26913.7 1801.79   2
   8 -14   5-95.5765 525.370   2
   9 -14   5 22875.4 1700.21   2
  10 -14   5 7884.48 1011.14   2
  11 -14   5 1086.43 561.251   2
  12 -14   5 55795.6 2914.27   2
  13 -14   5 1031.98 534.095   2
  17 -15  -5 1388.68 516.085   2
  16 -15  -5 5736.74 944.066   2
  15 -15  -5 26355.6 1859.24   2
  14 -15  -5 32589.8 2039.97   2
  13 -15  -5 3710.89 745.650   2
  12 -15  -5 7786.96 948.045   2
  11 -15  -5 30167.6 1817.63   2
  11  15  -5 30614.3 1863.03   5
  10 -15  -5 37899.6 2014.02   2
  10  15  -5 43093.8 2174.98   5
   9 -15  -5 3264.07 595.201   2
   9  15  -5 1802.26 528.737   5
   8  15  -5 19321.6 1391.94   5
   8 -15  -5 21281.6 1390.20   2
   7 -15  -5 4797.44 675.640   2
   7  15  -5 4832.97 691.940   5
   6 -15  -5 18573.0 1246.40   2
   6  15  -5 14392.2 1164.32   5
   5 -15  -5 18378.6 1211.61   2
   5  15  -5 17766.7 1293.87   5
   4 -15  -5 14265.6 1053.69   2
   4  15  -5 14439.4 1157.68   5
   3 -15  -5 2214.24 437.757   2
   3  15  -5 2722.31 566.393   5
   2 -15  -5 7552.51 720.811   2
   2  15  -5 6625.53 807.622   5
  -1  15   5 10857.5 733.828   5
   1  15  -5 11739.5 1035.21   5
   1 -15  -5 12043.2 900.344   2
  -1 -15   5 12725.1 821.376   3
   0  15   5-89.3660 186.816   5
   0  15  -5 249.229 339.904   5
   0 -15   5-268.566 440.314   2
   0 -15  -5 474.788 253.901   2
   0 -15   5 276.993 199.095   3
   1 -15   5 112.282 334.303   2
  -1  15  -5 108.158 346.635   5
  -1 -15  -5 69.8458 235.275   2
   2 -15   5 781.672 459.863   2
   3 -15   5 12887.3 1201.69   2
   4 -15   5 2128.71 617.370   2
   5 -15   5 234.174 380.920   2
   6 -15   5 15502.6 1343.71   2
   7 -15   5 3146.30 653.011   2
   8 -15   5 3222.35 710.762   2
   9 -15   5 4984.13 872.214   2
  10 -15   5 12171.4 1308.65   2
  11 -15   5 23348.2 1857.12   2
  12 -15   5 2290.47 641.321   2
  16 -16  -5 616.302 411.883   2
  15 -16  -5-271.880 494.892   2
  14 -16  -5 703.971 470.731   2
  13 -16  -5 19251.2 1563.98   2
  12  16  -5 24802.9 1766.43   5
  12 -16  -5 23155.6 1658.05   2
  11 -16  -5 31276.2 1906.40   2
  11  16  -5 33037.8 1973.58   5
  10 -16  -5 435.184 374.578   2
  10  16  -5 406.663 396.685   5
   9  16  -5 340.757 413.996   5
   9 -16  -5 92.7733 332.374   2
   8 -16  -5 863.200 393.891   2
   8  16  -5 870.934 399.603   5
   7  16  -5 2389.35 584.176   5
   7 -16  -5 4079.22 657.650   2
   6 -16  -5 76943.5 2833.38   2
   6  16  -5 78434.4 2984.03   5
   5 -16  -5 11060.6 982.358   2
   5  16  -5 10738.3 1050.10   5
   4 -16  -5 1421.38 440.878   2
   4  16  -5 670.091 443.809   5
   3 -16  -5 1500.67 395.498   2
   3  16  -5 1387.27 487.845   5
   2  16  -5 44845.0 2144.16   5
   2 -16  -5 44612.7 1928.91   2
   1  16  -5 3143.43 587.781   5
   1 -16  -5 3258.77 508.864   2
   0  16   5 215.167 216.408   5
   0  16  -5-487.091 419.874   5
   0 -16   5 289.874 406.088   2
   0 -16  -5-214.887 281.077   2
  -1  16  -5 7316.44 874.378   5
   1  16   5 7065.94 667.955   5
  -1 -16  -5 7278.43 737.197   2
   1 -16   5 5670.86 844.171   2
  -2 -16  -5 17440.6 1141.01   2
   2 -16   5 19960.6 1487.61   2
   3 -16   5 79792.8 3240.19   2
   4 -16   5 36544.5 2109.71   2
   5 -16   5 6145.75 889.657   2
   6 -16   5 32113.6 2049.73   2
   7 -16   5 10083.3 1147.13   2
   8 -16   5 4842.72 813.901   2
   9 -16   5 24777.7 1871.22   2
  10 -16   5 6170.17 981.794   2
  11 -16   5 35993.4 2349.10   2
  16 -17  -5 9709.92 1226.54   2
  15 -17  -5 3068.08 686.562   2
  14  17  -5 209.718 435.668   5
  14 -17  -5-195.720 481.468   2
  13  17  -5 4427.04 862.995   5
  13 -17  -5 3165.89 688.605   2
  12  17  -5 383.558 418.373   5
  12 -17  -5 1123.62 502.704   2
  11  17  -5 25129.1 1776.32   5
  11 -17  -5 26141.7 1787.82   2
  10  17  -5 9223.19 1056.57   5
  10 -17  -5 7396.49 950.639   2
   9 -17  -5 1101.17 431.672   2
   9  17  -5 854.196 485.558   5
   8 -17  -5 6861.72 865.843   2
   8  17  -5 7867.93 960.192   5
   7 -17  -5 23326.7 1532.51   2
   7  17  -5 27043.4 1708.71   5
   6  17  -5 624.032 374.031   5
   6 -17  -5 607.878 398.012   2
   5 -17  -5 29694.3 1674.44   2
   5  17  -5 27076.8 1693.46   5
   4 -17  -5 2091.36 473.935   2
   4  17  -5 2364.57 590.517   5
   3  17  -5 43866.4 2204.81   5
   3 -17  -5 47398.3 2083.03   2
   2 -17  -5 935.438 347.280   2
   2  17  -5 830.066 364.945   5
  -1 -17   5 15428.5 1348.55   2
   1  17  -5 16049.4 1296.68   5
   1 -17  -5 14255.9 1065.22   2
   0  17  -5 10001.7 1018.41   5
   0 -17  -5 9779.26 876.999   2
   0 -17   5 9980.25 1090.25   2
  -1  17  -5 1360.35 508.054   5
   1 -17   5 1390.99 509.175   2
  -1 -17  -5 700.243 336.957   2
   2 -17   5 23312.8 1673.49   2
   3 -17   5 35620.6 2131.09   2
   4 -17   5 4996.78 846.347   2
   5 -17   5 1248.42 528.626   2
   6 -17   5 8122.31 1086.96   2
   7 -17   5 197.349 485.856   2
   8 -17   5 14998.6 1474.36   2
   9 -17   5 5696.54 957.694   2
  10 -17   5 1248.63 622.307   2
  15 -18  -5 4728.20 870.052   2
  14 -18  -5 3985.99 807.905   2
  13  18  -5 2244.85 659.956   5
  13 -18  -5 2224.46 636.179   2
  12  18  -5 341.278 446.767   5
  12 -18  -5 965.077 489.894   2
  11  18  -5 3824.92 782.122   5
  11 -18  -5 3714.35 743.581   2
  10 -18  -5 9907.46 1124.94   2
  10  18  -5 10369.6 1126.61   5
   9 -18  -5 7651.61 979.664   2
   9  18  -5 9526.91 1073.20   5
   8 -18  -5 31550.7 1904.02   2
   8  18  -5 30700.5 1917.24   5
   7 -18  -5 36.1900 346.993   2
   7  18  -5 283.974 363.463   5
   6  18  -5 3431.47 700.232   5
   6 -18  -5 1780.80 516.243   2
   5 -18  -5 1262.44 408.551   2
   5  18  -5 617.022 446.897   5
   4 -18  -5 248.171 306.067   2
   4  18  -5 310.014 409.506   5
   3  18  -5 15160.0 1312.86   5
   3 -18  -5 13306.6 1124.42   2
   2 -18  -5-281.543 360.119   2
   2  18  -5 38.9946 397.304   5
   1 -18  -5 3321.34 588.076   2
   1  18  -5 5060.87 773.749   5
  -1 -18   5 3594.62 701.144   2
   0 -18   5 4312.08 822.747   2
   0  18  -5 4900.23 785.839   5
  -1  18  -5 10885.6 1127.56   5
   1 -18   5 9228.16 1094.39   2
   2 -18   5 714.649 428.021   2
   3 -18   5 5214.80 895.039   2
   4 -18   5 2369.39 676.150   2
   5 -18   5 401.405 439.372   2
   6 -18   5 17065.8 1584.34   2
   7 -18   5 3783.72 757.363   2
   8 -18   5 20617.9 1766.92   2
   9 -18   5 7284.68 1092.67   2
  14 -19  -5 2009.36 687.985   2
  13 -19  -5 1831.12 606.929   2
  12 -19  -5 5072.55 833.100   2
  12  19  -5 6722.73 1032.14   5
  11 -19  -5 3250.88 758.157   2
  11  19  -5 4044.99 805.471   5
  10  19  -5 1477.79 453.297   5
  10 -19  -5 1613.63 509.072   2
   9 -19  -5 2344.67 615.062   2
   9  19  -5 2511.01 678.906   5
   8 -19  -5 31241.9 1966.46   2
   8  19  -5 32702.6 2035.67   5
   7  19  -5 280.340 382.493   5
   7 -19  -5-183.797 491.776   2
   6  19  -5 782.622 465.902   5
   6 -19  -5 688.394 332.209   2
   5  19  -5 36147.7 2090.68   5
   5 -19  -5 36224.4 1987.97   2
   4 -19  -5 6292.48 797.513   2
   4  19  -5 7308.35 956.636   5
   3  19  -5 46521.1 2383.30   5
   3 -19  -5 46262.7 2208.93   2
  -2 -19   5 11791.4 1272.82   2
   2  19  -5 10568.0 1142.22   5
   1  19  -5 763.430 452.318   5
  -1 -19   5 979.182 508.300   2
   0  19  -5 65088.9 2906.33   5
   0 -19   5 73633.8 3258.22   2
   1 -19   5 6924.21 1009.20   2
   2 -19   5 7270.98 1070.87   2
   3 -19   5 32823.7 2153.97   2
   4 -19   5 9096.55 1137.91   2
   5 -19   5 29042.4 2088.19   2
   6 -19   5 1305.32 570.137   2
   7 -19   5 4221.84 899.368   2
   8 -19   5 27564.7 2112.74   2
  13 -20  -5 7941.83 1134.38   2
  12 -20  -5 3167.30 715.803   2
  11 -20  -5 11590.4 1283.62   2
  10 -20  -5 1931.80 642.643   2
  10  20  -5 3124.68 703.821   5
   9  20  -5 6939.37 995.614   5
   9 -20  -5 6740.79 968.585   2
   8 -20  -5-209.732 480.786   2
   8  20  -5 415.548 450.143   5
   7  20  -5 11261.0 1224.24   5
   7 -20  -5 9766.60 1112.43   2
   6 -20  -5 12842.4 1236.74   2
   6  20  -5 14318.9 1355.27   5
   5  20  -5 407.917 416.274   5
   5 -20  -5 1489.75 445.031   2
   4  20  -5 1714.85 509.505   5
   3  20  -5 6072.48 873.276   5
  -2 -20   5 25586.1 1919.20   2
   2  20  -5 27744.7 1849.32   5
  -1 -20   5 5755.16 944.085   2
   1  20  -5 4407.37 788.891   5
   0  20  -5 1376.10 507.202   5
   0 -20   5 1917.86 640.586   2
   1 -20   5-1150.75 543.922   2
   2 -20   5 13161.1 1398.95   2
   3 -20   5 4430.68 881.240   2
   4 -20   5-649.392 505.242   2
   5 -20   5-377.343 542.726   2
   6 -20   5 366.480 441.919   2
  12 -21  -5 3174.66 766.037   2
  11 -21  -5 1323.32 582.518   2
  10 -21  -5 29237.0 2047.82   2
   9  21  -5 2511.96 689.817   5
   9 -21  -5 1296.70 581.993   2
   8 -21  -5 16562.3 1501.41   2
   8  21  -5 17664.5 1592.91   5
   7  21  -5 5227.66 886.220   5
   6  21  -5 22524.3 1742.57   5
   5  21  -5 1429.43 550.838   5
   4  21  -5-222.926 462.826   5
  -3 -21   5 8512.70 1133.67   2
   3  21  -5 6833.39 971.462   5
   2  21  -5 5398.41 905.762   5
  -2 -21   5 6371.69 1015.92   2
   1  21  -5 29646.5 1988.14   5
  -1 -21   5 28678.7 2082.28   2
   0  21  -5 19727.1 1599.73   5
   0 -21   5 19549.5 1737.09   2
   1 -21   5 2498.04 725.525   2
   2 -21   5 2040.47 659.964   2
   3 -21   5 186.337 388.884   2
   4 -21   5 105.309 532.548   2
   7  22  -5 346.755 379.333   5
   6  22  -5 680.469 528.600   5
   5  22  -5 5114.97 901.927   5
   4  22  -5-72.8814 528.318   5
  -4 -22   5 150.681 468.957   2
   3  22  -5 983.301 488.856   5
  -3 -22   5 1267.49 455.737   2
   2  22  -5 2260.07 645.083   5
  -2 -22   5 3468.72 846.927   2
   1  22  -5 353.811 450.141   5
  -1 -22   5 439.595 548.758   2
   0  22  -5 3096.99 750.267   5
   0 -22   5 1670.98 664.900   2
   1 -22   5 13442.0 1489.30   2
   3  23  -5 9009.59 1180.54   5
   2  23  -5 120.516 462.307   5
   1  23  -5-280.238 460.221   5
  23   0  -6 3200.19 779.602   1
  22   0  -6 24019.5 1851.36   1
  21   0  -6 16310.4 1467.44   1
  20   0  -6 36941.0 2163.21   1
 -20   0   6 36491.7 2140.80   4
 -19   0   6 4068.59 735.748   4
  19   0  -6 3525.14 710.935   1
 -18   0   6 66133.7 2764.28   4
  18   0  -6 62714.3 2734.65   1
 -17   0   6 65113.1 2682.74   4
  17   0  -6 72022.2 2857.18   1
  16   0  -6 2022.10 497.310   1
 -16   0   6 2487.06 557.602   4
  15   0  -6 40755.5 1958.74   1
 -15   0   6 42162.9 1939.48   4
 -14   0   6 151462. 4127.07   4
 -13   0   6 14993.6 1027.42   4
 -12   0   6 86189.9 2648.29   4
 -11   0   6 5914.44 591.660   4
 -10   0   6 31731.0 1325.15   4
  -9   0   6 496762. 9595.90   4
   8   0  -6 48655.4 1687.05   1
  -8   0   6 51619.6 1581.26   4
  -7   0   6 66222.1 1788.78   4
   7   0  -6 64141.5 1945.95   1
   6   0  -6 227.457 152.595   1
   6   0  -6 637.426 165.439   5
  -6   0   6 352.164 138.044   4
   5   0  -6 21889.1 902.574   1
   5   0  -6 22786.9 816.133   5
  -4   0   6 77989.1 2085.91   6
   4   0  -6 79556.7 2012.21   1
   4   0  -6 81254.3 1773.28   4
  -4   0   6 80743.3 1906.65   5
   4   0  -6 80931.9 1938.51   5
   3   0  -6 4913.63 364.161   5
   3   0  -6 5042.87 254.151   4
   3   0  -6 5157.35 373.072   1
  -3   0   6 5521.88 438.079   3
  -3   0   6 4950.07 411.230   6
  -2   0   6 101233. 2482.95   6
   2   0  -6 97406.5 1907.10   4
  -2   0   6 103655. 2505.48   3
  -2   0   6 105486. 2230.79   1
  -1   0   6 11939.1 498.596   1
  -1   0   6 12772.0 691.041   6
  -1   0   6 10989.9 650.654   3
   0   0   6 271.747 187.640   3
   0   0   6 502.595 117.813   2
   0   0   6 335.143 88.4682   1
   1   0   6 150579. 3472.04   3
   1   0   6 147056. 3006.99   2
   2   0   6 72571.6 2074.65   3
   2   0   6 67715.9 1687.73   2
   3   0   6 47430.0 1629.85   3
   3   0   6 45014.4 1322.64   2
   4   0   6 80600.3 2376.74   3
   4   0   6 79519.6 2051.45   2
   5   0   6 22921.6 1146.18   3
  -5   0  -6 22009.6 901.749   4
   5   0   6 23478.7 977.642   2
  -6   0  -6 72088.3 2049.26   4
   6   0   6 79429.5 2174.86   2
   6   0   6 76411.7 2426.54   3
  -7   0  -6 285536. 5968.78   4
   7   0   6 284281. 6062.90   2
   7   0   6 291621. 6449.66   3
   8   0   6 877.019 260.691   2
   8   0   6 458.043 323.943   3
  -8   0  -6 763.715 242.246   4
   9   0   6 142824. 3735.21   2
   9   0   6 149283. 4071.54   3
  -9   0  -6 144800. 3684.18   4
  10   0   6 822.900 281.250   2
  10   0   6 1283.99 409.289   3
 -10   0  -6 1284.50 341.328   4
  11   0   6 4712.95 670.231   3
  11   0   6 4544.21 598.386   2
 -11   0  -6 4481.12 605.521   4
  12   0   6 176933. 4798.30   2
 -12   0  -6 186926. 4815.91   4
  13   0   6 3408.26 718.278   3
  13   0   6 2980.81 547.753   2
 -13   0  -6 1927.40 480.842   4
 -14   0  -6 124004. 3847.18   4
  14   0   6 123487. 3865.70   2
  14   0   6 118908. 4061.23   3
  15   0   6 29186.9 1749.95   2
 -15   0  -6 30097.9 1752.64   4
 -16   0  -6 36283.3 1993.32   4
 -17   0  -6 18163.9 1460.94   4
 -18   0  -6 12647.7 1249.15   4
  23  -1  -6 24234.1 1903.18   1
  23   1  -6 25836.9 1984.63   1
  22   1  -6 572.448 531.987   1
  22  -1  -6 693.987 505.887   1
 -22   1   6 1052.50 607.633   4
  21   1  -6-276.835 472.415   1
  21  -1  -6-295.029 498.329   1
 -21   1   6 423.711 450.691   4
  20  -1  -6-264.282 410.596   1
 -20   1   6 66.1426 403.848   4
  20   1  -6-321.375 420.891   1
  19  -1  -6 22048.3 1583.67   1
 -19   1   6 21440.7 1578.60   4
  19   1  -6 20982.3 1576.82   1
  18  -1  -6 18503.3 1422.31   1
 -18   1   6 21204.1 1504.91   4
  17  -1  -6 7769.06 904.735   1
 -17   1   6 6855.95 859.638   4
 -17  -1   6 5718.00 802.620   4
  16  -1  -6 7824.23 872.488   1
 -16   1   6 7533.16 852.541   4
 -16  -1   6 7084.26 834.253   4
 -15  -1   6 20903.7 1345.39   4
  15  -1  -6 19542.0 1336.41   1
 -15   1   6 20601.2 1325.74   4
 -14  -1   6 48446.5 2030.73   4
 -14   1   6 52077.3 2090.86   4
  14  -1  -6 52038.4 2149.35   1
  13  -1  -6 2151.01 427.746   1
 -13   1   6 2862.95 504.827   4
 -13  -1   6 2451.88 437.537   4
  12  -1  -6 5923.97 644.356   1
 -12  -1   6 6057.99 628.276   4
 -12   1   6 4558.36 552.697   4
  11  -1  -6 2000.21 406.855   1
 -11   1   6 2446.19 402.633   4
 -11  -1   6 1890.02 373.000   4
 -10   1   6 92401.3 2595.07   4
 -10  -1   6 93595.4 2614.25   4
  10  -1  -6 96044.2 2785.11   1
   9  -1  -6 24968.5 1209.58   1
  -9   1   6 28479.0 1167.03   4
  -9  -1   6 28804.1 1187.40   4
   8  -1  -6 1413.58 296.201   1
  -8   1   6 1462.24 273.846   4
   7  -1  -6 93485.5 2516.69   1
  -7   1   6 96116.7 2330.94   4
  -6   1   6 27003.3 929.074   4
   6   1  -6 26878.1 973.787   5
   6  -1  -6 26022.6 847.106   5
   6  -1  -6 25430.4 1061.43   1
   5  -1  -6 360.631 158.292   1
   5   1  -6 616.776 184.723   5
  -5   1   6 337.361 121.261   4
   5  -1  -6 461.017 127.337   5
  -4   1   6 14185.8 724.069   6
  -4  -1   6 15095.8 745.286   6
  -4   1   6 14789.1 574.525   2
  -4   1   6 14255.9 513.331   4
   4  -1  -6 13468.9 577.546   5
   4   1  -6 14813.6 676.497   5
  -4   1   6 14411.9 571.534   5
   4  -1  -6 13842.0 679.073   1
   4   1  -6 14550.3 560.161   4
   4   1  -6 14261.1 662.603   1
  -3   1   6 652.882 143.296   5
  -3   1   6 1197.71 234.794   6
   3   1  -6 762.360 184.135   5
   3   1  -6 683.290 152.982   1
  -3  -1   6 1125.31 224.864   6
  -3   1   6 322.321 161.497   3
   2   1  -6 15202.4 588.875   1
  -2  -1   6 16331.3 772.196   6
  -2   1   6 15134.3 744.014   6
  -2   1   6 15986.9 662.680   5
  -2  -1   6 14976.6 756.805   3
  -2   1   6 14030.6 723.409   3
  -1   1   6 151995. 3076.36   1
  -1  -1   6 147873. 3381.96   3
  -1   1   6 149499. 3357.40   3
  -1   1   6 141431. 3320.99   6
  -1  -1   6 145578. 3336.31   6
   0   1   6 2830.73 347.382   3
   0  -1   6 3162.82 274.662   2
   0   1   6 3531.76 206.070   2
   1  -1   6 47608.2 1559.55   3
   1   1   6 46218.5 1539.77   3
   1   1   6 48577.9 1130.55   2
   1  -1   6 47573.5 1032.54   1
  -1  -1  -6 45702.3 1004.46   4
   1  -1   6 48324.2 1324.13   2
   2  -1   6 59019.6 1596.09   2
   2  -1   6 57100.8 1809.35   3
   2   1   6 54589.0 1797.99   3
   2   1   6 58486.3 1418.72   2
  -2  -1  -6 62064.8 1446.34   2
  -2  -1  -6 59465.3 1335.09   4
   3   1   6 2312.27 367.621   3
   3  -1   6 2545.94 296.406   2
   3   1   6 2236.17 230.723   2
  -3  -1  -6 2358.09 228.322   4
  -3  -1  -6 2866.41 263.436   2
   3  -1   6 2133.76 359.096   3
   4   1   6 53307.7 1840.20   3
   4  -1   6 56822.5 1859.17   3
   4  -1   6 54130.0 1626.34   2
  -4  -1  -6 52343.5 1431.05   4
   4   1   6 53057.5 1481.94   2
   5   1   6 1053.21 215.882   2
   5   1   6 1094.98 283.537   3
   5  -1   6 430.918 219.569   3
   5  -1   6 1121.23 246.060   2
  -5  -1  -6 871.005 199.897   4
   6   1   6 120390. 3281.16   3
   6   1   6 113077. 2834.78   2
   6  -1   6 121574. 3248.06   3
   6  -1   6 120731. 3018.74   2
  -6  -1  -6 115227. 2813.03   4
   7   1   6 6614.82 545.336   2
  -7  -1  -6 7076.42 552.676   4
   7   1   6 6030.04 656.957   3
   7  -1   6 6530.60 678.833   3
   7  -1   6 5549.38 551.393   2
   8   1   6 21851.1 1081.01   2
   8  -1   6 23613.6 1290.92   3
   8   1   6 21806.0 1280.92   3
  -8   1  -6 21155.5 1081.20   4
   8  -1   6 21370.6 1129.35   2
  -8  -1  -6 22141.7 1065.00   4
  -9  -1  -6 236.319 210.359   4
   9  -1   6 19.2643 215.586   2
   9  -1   6 167.485 248.549   3
   9   1   6-128.110 234.104   2
   9   1   6-29.5864 311.796   3
  -9   1  -6 561.017 246.383   4
  10   1   6 15903.7 1019.27   2
  10  -1   6 17250.8 1181.42   3
  10   1   6 18416.2 1255.26   3
 -10  -1  -6 17955.5 1057.30   4
 -10   1  -6 18878.4 1108.76   4
  10  -1   6 17847.4 1120.60   2
  11  -1   6 7107.13 740.502   2
  11   1   6 8604.47 778.866   2
  11  -1   6 7962.29 849.205   3
  11   1   6 7792.87 861.434   3
 -11   1  -6 8422.84 782.023   4
 -11  -1  -6 7251.93 710.363   4
  12  -1   6 4215.06 632.102   2
  12  -1   6 4145.82 705.717   3
  12   1   6 4421.69 701.365   3
  12   1   6 4347.50 596.297   2
 -12   1  -6 4752.50 641.004   4
 -12  -1  -6 3517.05 545.200   4
  13   1   6 7253.70 773.406   2
  13  -1   6 7936.68 837.169   2
  13  -1   6 8248.04 931.940   3
  13   1   6 8835.15 997.762   3
 -13   1  -6 8542.75 862.935   4
 -13  -1  -6 7860.73 812.658   4
  14  -1   6 5738.26 769.939   2
 -14   1  -6 5047.91 730.336   4
  14  -1   6 4475.41 810.881   3
  14   1   6 6224.41 884.262   3
 -14  -1  -6 5592.15 766.405   4
  15  -1   6 38889.0 2041.37   2
 -15   1  -6 36178.4 1958.10   4
 -15  -1  -6 38541.9 1989.04   4
  16  -1   6 840.662 453.132   2
 -16   1  -6 999.912 491.528   4
 -16  -1  -6 587.853 384.231   4
 -17   1  -6-196.743 455.916   4
  17  -1   6 76.5367 355.586   2
 -18   1  -6 613.070 419.652   4
 -19   1  -6 19596.5 1628.37   4
  23   2  -6 1133.68 490.935   1
  23  -2  -6 72.0875 455.542   1
 -22   2   6 2969.94 736.139   4
  22  -2  -6 1577.39 550.068   1
  22   2  -6 2094.02 611.987   1
  21   2  -6 6109.11 942.530   1
  21  -2  -6 7362.25 1016.08   1
 -21   2   6 5441.99 898.470   4
 -20   2   6-285.816 438.071   4
  20  -2  -6 170.967 344.704   1
  19  -2  -6 1324.27 446.897   1
 -19   2   6 1636.63 491.158   4
  18  -2  -6 8.07593 338.091   1
 -18   2   6 237.653 350.270   4
  17  -2  -6 19565.7 1412.90   1
 -17   2   6 19594.6 1398.68   4
  16  -2  -6-113.382 277.893   1
 -16   2   6-197.994 307.639   4
  15  -2  -6 2348.93 521.754   1
 -15   2   6 2515.85 521.540   4
  14  -2  -6 80564.8 2817.31   1
 -14   2   6 82969.3 2785.39   4
  13  -2  -6 172.582 329.346   1
 -13   2   6 926.429 342.025   4
  12  -2  -6 10994.8 889.326   1
 -12   2   6 10935.1 839.316   4
  11  -2  -6 104989. 3079.15   1
 -11   2   6 109835. 3022.99   4
 -10   2   6 7405.47 624.646   4
  10  -2  -6 8478.70 713.743   1
   9  -2  -6 57299.0 1940.02   1
  -9   2   6 56436.7 1811.89   4
   8  -2  -6 47621.4 1672.31   1
  -8   2   6 44939.1 1487.63   4
   7  -2  -6 1944.13 321.302   1
  -7   2   6 1997.33 274.529   4
   6   2  -6 145564. 3298.57   5
   6  -2  -6 148731. 2943.20   5
   6  -2  -6 144170. 3444.69   1
  -6   2   6 147957. 3167.53   4
  -5   2   6 9628.08 471.011   4
   5  -2  -6 9143.47 417.269   5
   5   2  -6 9707.70 575.806   5
   5  -2  -6 10007.0 617.064   1
  -4   2   6 63693.4 1805.82   6
  -4   2   6 65876.6 1477.14   4
  -4  -2   6 64841.8 1810.97   6
  -4   2   6 65176.7 1468.66   5
  -4   2   6 62853.2 1761.00   3
   4   2  -6 60881.6 1744.40   5
  -4   2   6 65561.4 1532.68   2
  -3   2   6 87493.0 2269.30   6
  -3   2   6 90076.3 1796.35   4
   3   2  -6 89335.0 2272.47   5
  -3  -2   6 90025.2 2272.20   6
  -3   2   6 87976.5 1966.90   5
  -3   2   6 88412.5 2230.47   3
  -3   2   6 92844.9 1874.75   2
  -2   2   6 52911.4 1122.97   2
  -2  -2   6 51887.7 1574.99   6
  -2   2   6 52065.7 1584.84   6
  -2   2   6 54884.2 1397.29   5
  -2  -2   6 54098.4 1642.46   3
  -2   2   6 55881.2 1591.40   3
   2   2  -6 54663.8 1626.11   5
   2   2  -6 53772.8 1327.12   1
  -1   2   6 15571.0 761.681   3
  -1  -2   6 14853.5 747.336   6
   1   2  -6 14903.3 508.316   1
  -1  -2   6 14151.3 758.652   3
  -1   2   6 15463.6 761.882   6
   0   2   6 23185.8 977.219   3
   0  -2   6 22417.4 989.776   3
   1  -2   6 27618.4 1112.89   3
   1   2   6 25754.5 1077.56   3
   1   2   6 25757.6 639.664   2
   1  -2   6 25741.5 949.419   2
   2  -2   6 13562.7 780.305   3
   2   2   6 13422.1 782.129   3
  -2  -2  -6 14804.8 510.571   2
   2   2   6 13773.7 481.999   2
   2  -2   6 13242.5 680.712   2
   3   2   6 50808.0 1287.13   2
   3  -2   6 51132.5 1567.81   2
   3  -2   6 48474.1 1679.47   3
   3   2   6 47458.3 1695.45   3
   4   2   6 6237.25 396.320   2
   4   2   6 5750.81 564.563   3
   4  -2   6 5175.59 511.028   3
   4  -2   6 5587.45 482.414   2
  -4  -2  -6 5714.32 373.740   4
   5  -2   6 1329.70 313.842   3
   5   2   6 1011.54 296.112   3
   5  -2   6 869.668 246.114   2
   5   2   6 956.862 181.850   2
  -5  -2  -6 1702.16 242.690   4
   6   2   6 101300. 2493.42   2
   6  -2   6 97033.8 2844.92   3
   6  -2   6 99766.7 2746.32   2
   6   2   6 102356. 2954.41   3
  -6  -2  -6 99400.5 2484.88   4
   7   2   6 1707.45 285.654   2
   7  -2   6 1549.77 360.995   3
   7   2   6 1364.09 346.800   3
   7  -2   6 1259.24 314.760   2
  -7  -2  -6 1286.79 260.370   4
   8   2   6 884.797 268.294   2
   8   2   6 277.698 317.070   3
   8  -2   6 821.710 340.793   3
  -8  -2  -6 586.205 217.757   4
   8  -2   6 1499.28 337.030   2
   9  -2   6 88103.9 2781.14   2
   9   2   6 88097.8 2948.76   3
   9   2   6 85331.6 2559.86   2
   9  -2   6 91370.0 2913.91   3
  -9  -2  -6 91035.0 2611.07   4
  10  -2   6 1575.73 342.986   2
  10  -2   6 1854.57 422.024   3
 -10   2  -6 1049.85 323.099   4
  10   2   6 968.156 284.967   2
  10   2   6 1549.49 433.843   3
 -10  -2  -6 1164.62 315.497   4
  11   2   6 16378.7 1236.21   3
  11  -2   6 16450.3 1192.58   3
 -11   2  -6 16430.1 1122.04   4
 -11  -2  -6 17140.4 1078.62   4
  11  -2   6 17178.7 1167.49   2
  12  -2   6 14154.6 1118.28   2
 -12  -2  -6 14940.6 1056.75   4
  12  -2   6 14960.5 1185.44   3
 -12   2  -6 14743.5 1099.53   4
  12   2   6 14688.9 1224.76   3
  13  -2   6 572.242 388.840   2
  13  -2   6 996.235 500.383   3
  13   2   6 192.755 346.211   3
 -13   2  -6-233.109 347.268   4
 -13  -2  -6-274.860 339.439   4
 -14   2  -6 7567.69 851.400   4
  14  -2   6 7729.01 879.256   2
  14  -2   6 7237.67 919.771   3
 -15   2  -6 929.575 449.600   4
  15  -2   6 954.643 421.919   2
 -16   2  -6 715.791 455.549   4
  16  -2   6 1205.17 407.131   2
  17  -2   6 13353.3 1269.28   2
 -17   2  -6 12820.7 1244.35   4
  18  -2   6 1145.10 525.649   2
 -18   2  -6-35.9172 433.011   4
 -19   2  -6 1228.68 472.238   4
  23  -3  -6 18484.6 1659.42   1
  22  -3  -6 5078.21 835.706   1
 -22   3   6 5350.26 913.237   4
  21  -3  -6 1012.99 468.412   1
 -21   3   6-501.145 604.046   4
 -20   3   6 16604.6 1463.61   4
  20  -3  -6 14863.6 1373.26   1
 -19   3   6-426.878 506.329   4
  19  -3  -6 207.400 355.219   1
  18  -3  -6 19342.8 1439.65   1
 -18   3   6 18028.6 1415.18   4
  17  -3  -6 26118.7 1632.32   1
 -17   3   6 24967.3 1589.18   4
  16  -3  -6 6888.83 816.119   1
 -16   3   6 7053.19 838.905   4
  15  -3  -6 20939.3 1381.08   1
 -15   3   6 22938.3 1406.50   4
  14  -3  -6 72.8059 319.879   2
 -14   3   6 238.649 328.369   4
  14  -3  -6-394.220 355.225   1
 -13   3   6 1161.68 361.689   4
  13  -3  -6 539.810 324.783   2
  13  -3  -6 782.788 322.647   1
  12  -3  -6 15112.6 1042.22   1
  12  -3  -6 14751.7 980.928   2
 -12   3   6 14199.6 977.849   4
  11  -3  -6 198.419 244.943   2
 -11   3   6 467.643 252.262   4
  11  -3  -6-27.2927 258.684   1
  10  -3  -6 24469.0 1248.93   1
 -10   3   6 26129.1 1201.88   4
  10  -3  -6 24941.2 1175.98   2
   9  -3  -6 2618.10 373.133   2
   9  -3  -6 2004.50 349.767   1
   8  -3  -6 25801.3 1203.02   1
   8  -3  -6 27214.1 1093.73   2
   7  -3  -6-27.6878 202.939   1
   7  -3  -6 242.137 83.6865   5
   7  -3  -6 182.553 157.067   2
   6  -3  -6 57967.1 1290.67   5
   6   3  -6 58936.3 1756.02   5
   6  -3  -6 60926.5 1607.31   2
   6  -3  -6 58213.1 1823.91   1
   5   3  -6 1490.37 269.236   5
   5  -3  -6 974.847 164.103   2
  -4  -3   6 989.527 217.056   6
  -4   3   6 586.982 205.307   6
   4   3  -6 880.634 233.516   5
  -4   3   6 817.440 107.035   5
  -4   3   6 873.494 140.612   2
  -4   3   6 1231.15 221.029   3
  -3   3   6 32478.4 845.139   2
   3   3  -6 32921.7 1219.45   5
  -3  -3   6 34329.3 1178.52   6
  -3   3   6 33034.8 890.370   5
  -3   3   6 33724.6 1128.05   3
  -2   3   6 58691.9 1227.85   2
  -2   3   6 69150.6 1827.99   6
  -2  -3   6 67052.2 1798.45   6
   2   3  -6 64159.0 1851.13   5
  -2  -3   6 64245.5 1845.89   3
  -2   3   6 62846.6 1731.40   3
  -1   3   6 2138.45 292.623   3
  -1  -3   6 1518.41 245.080   6
  -1   3   6 1718.07 248.835   6
  -1  -3   6 2140.46 307.583   3
   0   3   6 106440. 2015.63   4
   0   3   6 119284. 2735.15   3
   0   3  -6 106541. 2052.68   1
   0  -3   6 115996. 2772.93   3
   1  -3   6 40368.7 1421.47   3
   1   3   6 38149.2 1373.57   3
   1  -3   6 38444.8 1294.12   2
   2  -3   6 6090.00 528.895   3
   2  -3   6 5654.11 469.062   2
   2   3   6 5922.89 532.015   3
  -2  -3  -6 6822.41 296.558   2
   3  -3   6 15760.3 828.494   2
   3   3   6 15710.5 901.407   3
   3  -3   6 16386.8 887.588   3
  -3  -3  -6 16858.7 599.464   2
  -4  -3  -6 12770.7 571.108   2
   4  -3   6 12450.9 758.724   2
   4  -3   6 10744.5 740.205   3
   4   3   6 11829.8 806.302   3
   5  -3   6 20635.4 1084.20   3
   5   3   6 21392.6 1141.48   3
   5  -3   6 21340.9 1055.60   2
   6  -3   6 65717.7 2182.81   2
   6   3   6 70106.9 2347.72   3
   6  -3   6 71820.3 1489.82   1
   6  -3   6 68623.1 2265.01   3
   7  -3   6 6644.35 343.386   1
   7  -3   6 5598.62 595.024   3
   7   3   6 5079.40 613.298   3
   7  -3   6 6235.32 612.279   2
   8  -3   6 159.099 93.7152   1
   8   3   6 213.309 300.550   3
   8  -3   6 153.787 229.072   2
   8  -3   6-231.567 321.490   3
   9  -3   6 5376.53 382.284   1
   9  -3   6 5891.92 679.486   3
   9   3   6 4741.64 640.425   3
   9  -3   6 4691.51 596.207   2
  10   3   6 10709.7 981.504   3
  10  -3   6 11335.0 955.574   3
  10  -3   6 12484.8 981.567   2
  11  -3   6 4957.57 648.826   2
  11  -3   6 6990.87 771.664   3
  11   3   6 6202.36 756.796   3
  12  -3   6-127.140 344.536   2
  12   3   6 775.401 399.805   3
  12  -3   6 728.608 374.696   3
 -12   3  -6 262.323 328.058   4
  13  -3   6 316.399 393.848   3
  13   3   6 426.734 396.497   3
 -13   3  -6-41.0574 400.116   4
  13  -3   6-329.753 426.233   2
 -14   3  -6-280.315 426.574   4
  14  -3   6 45.1447 331.903   3
  14  -3   6 591.458 371.226   2
  15  -3   6 32674.9 1934.93   2
 -15   3  -6 32736.3 1892.34   4
  15  -3   6 37619.0 2062.12   3
  16  -3   6 148.916 339.664   2
 -16   3  -6-411.159 434.591   4
  17  -3   6 1333.70 499.932   2
 -17   3  -6 2694.80 680.592   4
  18  -3   6 6814.63 958.448   2
 -18   3  -6 5231.83 852.425   4
 -19   3  -6-1173.82 729.617   4
  23  -4  -6-327.595 558.580   1
 -22   4   6 7298.74 1021.52   4
  22  -4  -6 5257.01 847.339   1
 -21   4   6 10430.2 1212.91   4
  21  -4  -6 11232.3 1210.48   1
 -20   4   6 42.6412 458.863   4
  20  -4  -6-63.5219 378.433   1
 -19   4   6 4041.86 749.525   4
  19  -4  -6 5019.50 789.146   1
  18  -4  -6 3433.58 643.863   1
 -18   4   6 4246.96 684.393   4
  17  -4  -6 8665.67 952.504   1
 -17   4   6 6289.24 843.224   4
  17  -4  -6 8145.28 938.580   2
  16  -4  -6 1098.68 380.517   1
 -16   4   6 193.394 366.052   4
  16  -4  -6 582.979 313.855   2
  15  -4  -6 27584.3 1589.86   1
  15  -4  -6 26639.2 1553.14   2
 -15   4   6 28977.5 1617.93   4
  14  -4  -6 3176.44 556.486   1
 -14   4   6 4125.31 595.579   4
  14  -4  -6 3214.79 537.369   2
  13  -4  -6 8243.63 811.318   1
 -13   4   6 9672.82 854.541   4
  13  -4  -6 9285.59 820.674   2
  12  -4  -6 16854.8 1131.98   1
  12  -4  -6 15929.3 1043.79   2
  11  -4  -6 98745.6 3019.63   1
  11  -4  -6 100081. 2872.80   2
  10  -4  -6 25146.2 1185.61   2
  10  -4  -6 25173.6 1279.51   1
   9  -4  -6 8834.61 646.623   2
   9  -4  -6 7750.65 687.034   1
   8  -4  -6 3743.85 464.608   1
   8  -4  -6 4269.15 428.497   2
   7  -4  -6 53070.2 1570.70   2
   7  -4  -6 50566.9 1103.99   5
   6  -4  -6 240379. 4854.88   2
   6   4  -6 242061. 5149.43   5
   5  -4  -6 16585.1 670.223   2
   5   4  -6 16936.1 869.989   5
  -5   4   6 17425.3 744.500   3
  -4  -4   6 10525.4 615.973   6
  -4   4   6 10251.6 481.402   2
   4  -4  -6 10163.0 452.724   2
  -4   4   6 9990.77 324.413   5
   4   4  -6 9793.24 652.837   5
  -4   4   6 10616.9 570.820   3
  -3  -4   6 31188.6 1117.50   6
  -3   4   6 30714.6 804.693   5
  -3   4   6 29962.9 1105.21   6
   3   4  -6 28857.0 1189.25   5
   3  -4  -6 30808.1 783.654   2
  -3   4   6 32091.1 1084.01   3
  -3   4   6 27878.3 799.492   2
  -2   4   6 274056. 5102.75   3
  -2   4   6 282726. 5202.53   6
   2   4  -6 275594. 5376.36   5
  -2  -4   6 281550. 5187.42   6
  -1   4   6 51025.3 1554.89   3
   1   4  -6 53507.4 1739.73   5
  -1  -4   6 52670.3 1655.77   3
   0   4   6 6744.43 514.969   3
   0  -4   6 6015.21 507.235   3
   1   4   6 24318.0 1040.45   3
   1   4   6 22918.3 657.989   4
   1  -4   6 21954.5 995.092   2
   1  -4   6 21714.4 1000.49   3
   2  -4   6 130118. 3184.00   3
  -2  -4  -6 126912. 2469.69   2
   2   4   6 127060. 3175.23   3
   2   4   6 132553. 2643.40   4
   2  -4   6 129496. 3146.80   2
   3  -4   6 71712.3 2174.97   3
  -3  -4  -6 76473.6 1670.92   2
   3   4   6 75417.8 2261.53   3
   3   4   6 75919.8 1783.12   4
   3  -4   6 72084.3 2168.58   2
   4  -4   6 33278.8 1375.25   2
   4  -4   6 33109.8 1358.40   3
  -4  -4  -6 35610.0 1032.08   2
   4   4   6 32223.4 1413.85   3
   5  -4   6 800.559 242.324   3
   5  -4   6 557.741 250.769   2
   5   4   6 1320.42 330.136   3
   6  -4   6 45874.3 1774.99   2
   6  -4   6 48938.2 1789.02   3
   6   4   6 46606.3 1859.67   3
   7   4   6 56268.8 2148.15   3
   7  -4   6 56333.1 2019.98   3
   7  -4   6 54151.1 2025.46   2
   8   4   6 2450.49 460.486   3
   8  -4   6 2267.70 405.497   3
   8  -4   6 2784.83 449.059   2
   9   4   6 18292.5 1241.04   3
   9  -4   6 18919.7 1203.98   2
   9  -4   6 19217.8 1193.87   3
  10  -4   6 3744.30 573.877   2
  10   4   6 3812.44 611.960   3
  10  -4   6 3502.21 550.927   3
  11  -4   6 53958.2 2233.57   3
  11   4   6 56976.0 2436.82   3
  11  -4   6 50944.2 2221.10   2
  12  -4   6 7225.24 840.417   2
  12  -4   6 7242.32 815.917   3
  12   4   6 8436.14 931.648   3
  13  -4   6 6412.49 789.201   2
  13  -4   6 5293.93 722.816   3
 -13   4  -6 5731.59 750.664   4
  14  -4   6 715.281 327.336   2
 -14   4  -6 97.4330 389.572   4
  14  -4   6 927.900 325.485   3
  15  -4   6 207.453 320.773   2
  15  -4   6 678.251 368.098   3
 -15   4  -6-76.4241 348.655   4
  16  -4   6 661.446 327.961   2
 -16   4  -6 767.232 393.958   4
  17  -4   6 5310.45 848.766   2
 -17   4  -6 5280.07 849.885   4
  18  -4   6 2948.34 631.936   2
 -18   4  -6 3232.10 760.961   4
  23  -5  -6-90.9955 499.598   1
  22  -5  -6 1756.63 560.864   1
 -21   5   6 10724.8 1234.12   4
  21  -5  -6 11873.9 1273.42   1
  20  -5  -6 28661.3 1896.45   1
 -20   5   6 28290.8 1917.93   4
  19  -5  -6 36865.7 2120.55   1
 -19   5   6 39142.5 2196.17   4
  18  -5  -6 3729.98 667.258   1
 -18   5   6 3617.37 679.177   4
  18  -5  -6 3175.16 654.247   2
  17  -5  -6 7029.93 861.459   1
  17  -5  -6 7587.80 859.658   2
 -17   5   6 6077.70 787.216   4
  16  -5  -6 2199.26 498.026   1
  16  -5  -6 1374.74 392.691   2
 -16   5   6 1724.67 481.167   4
  15  -5  -6 10008.6 942.983   1
  15  -5  -6 10177.6 958.296   2
 -15   5   6 8635.83 871.186   4
  14  -5  -6 53919.3 2208.92   2
  14  -5  -6 55850.2 2288.91   1
  13  -5  -6 12874.1 975.908   2
  13  -5  -6 12074.4 988.245   1
  12  -5  -6 43398.7 1816.87   2
  12  -5  -6 44823.9 1901.63   1
  11  -5  -6 25481.2 1264.42   2
  11  -5  -6 22555.6 1289.31   1
  10  -5  -6 56049.0 1931.85   2
  10  -5  -6 56519.6 2069.39   1
   9  -5  -6 16452.0 911.017   2
   8  -5  -6 46908.9 1575.89   2
   7  -5  -6 29616.7 1115.38   2
   7   5  -6 28217.2 1222.34   5
   6   5  -6 8933.31 677.017   5
  -6   5   6 9461.23 530.264   3
   6  -5  -6 9906.72 568.687   2
   5   5  -6 275568. 5720.82   5
  -5   5   6 268743. 5324.25   3
   5  -5  -6 268521. 5278.85   2
  -4   5   6 17676.2 824.967   6
   4   5  -6 18084.7 937.094   5
  -4  -5   6 17948.2 825.536   6
   4  -5  -6 18913.0 682.557   2
  -4   5   6 19144.0 774.663   3
  -4   5   6 19435.0 713.623   2
   3   5  -6 305169. 6353.05   5
  -3  -5   6 303300. 6097.25   6
  -3   5   6 299026. 6095.44   6
  -3   5   6 315943. 5698.68   2
   3  -5  -6 314989. 5646.89   2
  -2   5   6 23827.5 924.434   3
  -2   5   6 23491.3 962.793   6
   2   5  -6 22549.9 1079.84   5
   2  -5  -6 23048.4 599.458   2
  -2  -5   6 23580.5 954.789   6
  -1   5   6 14413.4 728.144   3
  -1  -5   6 14572.1 794.125   3
   1   5  -6 13619.7 852.688   5
   0   5   6 200555. 4366.49   3
   0  -5   6 204366. 4449.08   3
   1  -5   6 1892.34 318.780   3
   1   5   6 1408.29 276.686   3
   1  -5   6 1716.92 306.290   2
   2  -5   6 115673. 2925.16   3
   2   5   6 122729. 3012.33   3
  -2  -5  -6 112938. 2236.65   2
   2   5   6 119709. 2481.28   4
   2  -5   6 112998. 2970.06   2
   3  -5   6 325248. 6729.21   3
  -3  -5  -6 326781. 6033.78   2
   3  -5   6 328268. 6836.59   2
   3   5   6 331667. 6841.86   3
   4  -5   6 3393.67 434.952   3
   4  -5   6 3472.90 461.481   2
   4   5   6 3129.02 433.987   3
  -4  -5  -6 3551.57 292.515   2
   5  -5   6 23294.6 1200.33   2
   5  -5   6 22741.0 1136.92   3
   5   5   6 23687.5 1221.33   3
   6  -5   6 684.467 247.064   3
   6   5   6 694.643 261.150   3
   6  -5   6 614.385 232.863   2
   7  -5   6 6826.45 668.156   3
   7   5   6 6885.78 710.471   3
   7  -5   6 7133.48 701.805   2
   8   5   6 62185.0 2361.46   3
   8  -5   6 59166.6 2164.04   3
   8  -5   6 59390.1 2262.94   2
   9   5   6 9713.08 921.103   3
   9  -5   6 9810.77 833.090   3
   9  -5   6 7330.37 796.568   2
  10   5   6 3961.23 635.632   3
  10  -5   6 3850.24 578.990   3
  10  -5   6 3424.24 557.059   2
  11   5   6 7150.38 905.542   3
  11  -5   6 7386.52 819.184   3
  11  -5   6 6386.86 798.199   2
  12  -5   6 49445.5 2196.93   3
  12   5   6 50379.4 2393.34   3
  12  -5   6 52706.1 2339.82   2
  13  -5   6 7582.76 896.816   2
  13  -5   6 7598.90 870.582   3
  14  -5   6 223.913 298.569   2
 -14   5  -6 584.323 331.782   4
  14  -5   6-176.117 463.235   3
  15  -5   6 658.144 343.484   3
  15  -5   6 265.363 354.476   2
 -15   5  -6 962.680 432.046   4
  16  -5   6 4081.25 745.648   2
 -16   5  -6 3514.05 719.945   4
  17  -5   6 5596.96 889.402   2
 -17   5  -6 6523.42 932.187   4
 -18   5  -6 30036.8 2061.10   4
  21  -6  -6 5517.42 897.660   1
 -21   6   6 4440.25 894.889   4
  20  -6  -6 9272.01 1089.51   1
  20  -6  -6 8751.01 1096.07   2
 -20   6   6 6379.30 967.201   4
  19  -6  -6 5047.32 808.121   1
 -19   6   6 5086.04 822.319   4
  19  -6  -6 4696.31 813.108   2
  18  -6  -6 23221.3 1629.58   2
 -18   6   6 23254.1 1643.09   4
  18  -6  -6 24649.8 1645.33   1
 -17   6   6 9518.72 1002.02   4
  17  -6  -6 7035.52 871.298   2
  17  -6  -6 8587.45 959.793   1
  16  -6  -6 31866.8 1790.08   2
  16  -6  -6 34588.8 1861.98   1
 -16   6   6 31260.0 1781.90   4
  15  -6  -6 12764.1 1078.10   2
  15  -6  -6 13739.1 1140.19   1
  14  -6  -6 4959.46 671.990   1
  14  -6  -6 6227.98 724.883   2
  13  -6  -6 65454.9 2422.34   2
  12  -6  -6 1584.91 423.023   2
  11  -6  -6 57912.5 2079.54   2
  10  -6  -6 437.334 246.189   2
   9  -6  -6 31271.2 1333.58   2
   8  -6  -6 7951.89 603.980   2
   7  -6  -6 908.336 228.271   2
  -7   6   6 1126.48 192.906   3
   6   6  -6 28667.1 1265.65   5
   6  -6  -6 27804.8 1059.30   2
  -6   6   6 27846.9 961.260   3
   5  -6  -6 21706.2 846.078   2
   5   6  -6 23263.2 1115.22   5
  -5   6   6 21459.5 810.211   3
  -4  -6   6 1090.45 209.907   6
  -4   6   6 1577.96 232.129   3
  -4   6   6 1619.40 259.240   6
  -4   6   6 1369.47 190.989   2
   4   6  -6 1061.88 286.601   5
   4  -6  -6 1745.19 216.397   2
  -3   6   6 207.604 132.376   3
  -3  -6   6 369.079 167.314   6
  -3   6   6 497.335 167.760   6
   3   6  -6 461.268 279.628   5
   3  -6  -6 588.706 124.459   2
  -2   6   6 51999.4 1507.73   3
  -2   6   6 50398.8 1555.57   6
   2   6  -6 49484.0 1790.17   5
   2  -6  -6 51639.0 1201.76   2
  -2  -6   6 51989.6 1552.83   6
   1   6  -6 9918.93 750.257   5
  -1   6   6 9984.96 599.617   3
   1  -6  -6 10062.3 352.541   2
  -1  -6   6 9454.90 645.377   3
   0   6   6 3111.49 355.682   3
   0  -6  -6 2499.89 160.820   2
   0  -6   6 3673.02 407.475   3
   1  -6   6 22378.3 1087.98   2
   1   6   6 23787.6 1021.03   3
   1  -6   6 23964.6 1045.27   3
   2  -6   6 4571.23 470.978   3
  -2   6  -6 4253.91 198.050   1
   2  -6   6 5008.55 553.784   2
  -2  -6  -6 4638.47 246.814   2
   3  -6   6 43547.7 1562.44   3
   3   6   6 42203.6 1602.56   3
  -3  -6  -6 44856.7 1114.37   2
   3  -6   6 40843.9 1629.34   2
   4  -6   6 618.900 276.051   2
   4  -6   6 695.351 245.090   3
  -4  -6  -6 970.963 154.745   2
   4   6   6 1157.26 318.393   3
   5  -6   6 54201.3 2046.67   2
   5   6   6 55339.3 2007.47   3
   5  -6   6 55243.7 1886.62   3
   6  -6   6-106.485 274.290   2
   6  -6   6 399.787 214.705   3
   6   6   6 388.131 223.913   3
   7   6   6 54377.4 2113.51   3
   7  -6   6 49357.6 1857.92   3
   7  -6   6 49433.5 2025.41   2
   8  -6   6 25661.6 1451.01   2
   8  -6   6 27633.4 1372.79   3
   8   6   6 28436.3 1545.34   3
   9  -6   6 2929.57 533.499   2
   9  -6   6 2057.88 388.036   3
   9   6   6 2702.19 536.861   3
  10  -6   6 21463.8 1404.80   2
  10  -6   6 19604.2 1243.96   3
  10   6   6 21376.5 1438.74   3
  11  -6   6 41354.7 1911.95   3
  11  -6   6 37989.6 1992.49   2
  11   6   6 43125.8 2118.35   3
  12  -6   6 8956.36 898.418   3
  12  -6   6 12208.3 1139.68   2
  13  -6   6 7047.06 840.828   3
  13  -6   6 8708.70 972.055   2
  14  -6   6 10706.0 1051.00   3
  14  -6   6 12804.2 1202.38   2
  15  -6   6 123.259 357.792   2
  15  -6   6-124.221 355.458   3
  16  -6   6 31371.5 2054.42   2
 -16   6  -6 34960.8 2112.51   4
  17  -6   6 4672.98 842.822   2
 -17   6  -6 5597.01 886.225   4
 -18   6  -6 10513.2 1224.59   4
 -21   7   6 1933.11 673.737   4
  21  -7  -6 2230.08 652.335   2
  20  -7  -6 26831.5 1879.63   2
 -20   7   6 23142.3 1790.46   4
  19  -7  -6 1610.99 523.015   2
 -19   7   6 593.515 399.987   4
  18  -7  -6 50589.6 2472.51   2
 -18   7   6 47702.9 2431.46   4
  17  -7  -6 10033.1 1061.29   2
 -17   7   6 12662.2 1190.15   4
  16  -7  -6 481.437 355.932   2
  15  -7  -6 79098.1 2915.99   2
  14  -7  -6 2993.67 577.194   2
  13  -7  -6 2020.17 485.990   2
  12  -7  -6 37321.7 1724.25   2
  11  -7  -6 20899.7 1191.61   2
  10  -7  -6 40941.9 1665.29   2
   9  -7  -6 4618.40 508.339   2
   8  -7  -6 21033.0 1037.81   2
  -8   7   6 20206.1 780.236   3
   7  -7  -6 12412.2 739.163   2
  -7   7   6 13121.8 589.975   3
   7   7  -6 13012.5 871.863   5
   6   7  -6 42039.7 1656.14   5
   6  -7  -6 44053.7 1442.22   2
  -6   7   6 44011.0 1229.53   3
  -5   7   6 19474.0 750.044   3
  -5  -7   6 20550.5 909.703   6
  -5   7   6 20128.9 903.147   6
   5  -7  -6 20747.8 859.835   2
   5   7  -6 20969.2 1095.74   5
  -4   7   6 3105.48 297.217   3
   4  -7  -6 3222.20 311.605   2
  -4  -7   6 2825.59 326.940   6
  -4   7   6 3059.62 341.419   6
   4   7  -6 2666.99 428.684   5
   3  -7  -6 41911.5 1168.38   2
  -3   7   6 40360.3 1234.53   3
   3   7  -6 41139.0 1602.51   5
  -3   7   6 41349.4 1346.73   6
  -3  -7   6 38642.6 1303.65   6
   2   7  -6 77299.6 2352.15   5
   2  -7  -6 70807.5 1672.32   2
  -2   7   6 71920.1 1980.16   6
  -2   7   6 75767.4 1935.89   3
  -2  -7   6 75709.5 1994.36   6
  -1   7   6 22879.4 935.667   3
   1   7  -6 21694.5 1130.87   5
   1  -7  -6 21350.9 671.817   2
  -1  -7   6 22862.2 1044.22   3
   0  -7  -6 29832.0 801.990   2
   0   7  -6 27469.1 1320.28   5
   0  -7   6 28952.1 1199.29   3
   0   7   6 29044.0 1135.83   3
   1   7   6 103980. 2677.00   3
   1  -7   6 98499.8 2862.25   2
   1  -7   6 105281. 2720.75   3
   2  -7   6 8687.14 633.082   3
   2   7   6 9506.22 676.206   3
   2  -7   6 8533.37 715.408   2
  -2  -7  -6 8413.44 373.388   2
   3  -7   6 32624.1 1314.86   3
  -3   7  -6 31716.7 803.126   1
  -3  -7  -6 34798.1 958.015   2
   3   7   6 34736.3 1416.38   3
   3  -7   6 33105.9 1490.82   2
   4  -7   6 16406.9 919.649   3
   4   7   6 17273.1 1018.91   3
   4  -7   6 17664.4 1085.80   2
   5  -7   6 4083.71 544.369   2
   5   7   6 3871.04 509.700   3
   5  -7   6 4536.95 508.950   3
   6  -7   6 81368.5 2754.25   2
   6  -7   6 83779.6 2513.78   3
   6   7   6 84583.7 2728.97   3
   7  -7   6 4378.30 524.671   3
   7  -7   6 4338.52 603.853   2
   7   7   6 4939.57 639.750   3
   8  -7   6 6687.41 770.826   2
   8   7   6 5367.81 689.888   3
   8  -7   6 6712.17 650.854   3
   9  -7   6 15479.7 1035.01   3
   9  -7   6 13645.1 1107.93   2
   9   7   6 15711.7 1191.69   3
  10  -7   6 40784.7 1797.14   3
  10   7   6 37275.3 1939.33   3
  10  -7   6 39102.6 1971.03   2
  11  -7   6 35131.0 1714.22   3
  11  -7   6 31251.1 1816.02   2
  12  -7   6 12616.6 1200.22   2
  12  -7   6 12768.3 1069.90   3
  13  -7   6 12430.0 1085.96   3
  13  -7   6 11773.5 1181.28   2
  14  -7   6 8639.58 1047.05   2
  14  -7   6 7301.23 899.237   3
  15  -7   6 46499.0 2509.01   2
  16  -7   6-325.841 332.073   2
 -16   7  -6 6.02202 400.657   4
  17  -7   6 2044.53 633.067   2
 -17   7  -6 2389.44 697.217   4
  21  -8  -6 3452.66 773.477   2
 -21   8   6 3920.44 836.333   4
  20  -8  -6 1354.13 538.430   2
 -20   8   6 420.500 461.012   4
  19  -8  -6 4347.94 799.846   2
 -19   8   6 4567.23 819.138   4
  18  -8  -6 3394.86 706.675   2
 -18   8   6 2819.68 656.548   4
  17  -8  -6 7433.39 939.188   2
  16  -8  -6 503.600 395.226   2
  15  -8  -6 2440.04 537.819   2
  14  -8  -6-1.53535 308.566   2
  13  -8  -6 3371.22 543.136   2
  12  -8  -6 83914.8 2792.33   2
  11  -8  -6 12901.9 940.415   2
  10  -8  -6 25845.1 1314.23   2
   9  -8  -6 10966.9 795.863   2
  -9   8   6 10966.0 536.119   3
   8  -8  -6 11.4302 198.803   2
  -8   8   6 453.814 128.364   3
   7   8  -6 54755.5 1962.90   5
   7  -8  -6 51701.6 1714.08   2
  -7   8   6 48401.2 1294.27   3
  -6   8   6 6458.09 376.269   3
   6   8  -6 5571.39 597.481   5
   6  -8  -6 6388.31 520.229   2
  -5   8   6 66848.7 1926.78   6
  -5   8   6 69074.1 1674.67   3
  -5  -8   6 69044.0 1918.85   6
   5  -8  -6 72013.4 1953.87   2
   5   8  -6 70576.4 2277.18   5
  -4  -8   6 16142.3 783.913   6
  -4   8   6 16976.1 682.178   3
  -4   8   6 16495.2 801.855   6
   4   8  -6 16616.3 1000.73   5
   4  -8  -6 17384.2 772.697   2
  -3  -8   6 9586.40 589.312   6
   3  -8  -6 10825.4 554.106   2
  -3   8   6 10278.1 542.793   3
   3   8  -6 11002.5 815.200   5
  -3   8   6 10852.2 623.025   6
   2  -8  -6 13511.7 603.909   2
  -2   8   6 13111.0 661.060   3
   2   8  -6 15258.3 968.201   5
  -1   8   6 20366.3 889.855   3
   1  -8  -6 22049.7 753.950   2
  -1  -8   6 21430.8 1024.92   3
   1   8  -6 21486.7 1170.46   5
   0   8   6 584.661 192.571   3
   0   8  -6 921.391 327.615   5
   0  -8  -6 736.231 139.722   2
   0  -8   6 1073.73 280.251   3
   1   8   6 106048. 2775.27   3
   1  -8   6 106164. 3061.32   2
   1  -8   6 108973. 2806.29   3
   2   8   6 34803.5 1385.78   3
   2  -8   6 34090.9 1536.94   2
   2  -8   6 34295.5 1348.47   3
   3  -8   6 2546.74 370.535   3
   3   8   6 2543.42 391.905   3
  -3   8  -6 2405.46 213.650   1
  -3  -8  -6 2372.81 220.858   2
   3  -8   6 2253.43 425.842   2
   4  -8   6 62665.1 2248.53   2
   4  -8   6 64213.5 1975.44   3
   4   8   6 64033.9 2132.64   3
   5  -8   6 24683.2 1373.18   2
   5  -8   6 23357.7 1143.94   3
   5   8   6 22017.2 1233.54   3
   6  -8   6 69.5536 189.899   3
   6  -8   6 114.739 267.938   2
   6   8   6 295.047 279.580   3
   7  -8   6 22836.5 1194.92   3
   7  -8   6 22153.7 1382.38   2
   7   8   6 22753.0 1342.20   3
   8  -8   6 52.6603 242.459   3
   8   8   6-35.3524 351.756   3
   8  -8   6 115.713 305.204   2
   9  -8   6 13540.7 1137.46   2
   9  -8   6 15790.8 1042.39   3
   9   8   6 14330.3 1148.45   3
  10  -8   6 45106.3 2191.99   2
  10  -8   6 46503.6 1940.92   3
  11  -8   6 9985.02 898.649   3
  11  -8   6 10439.4 1064.42   2
  12  -8   6 14733.8 1299.54   2
  12  -8   6 14475.4 1119.47   3
  13  -8   6 1020.87 419.071   3
  13  -8   6 1677.30 565.986   2
  14  -8   6 2225.70 619.414   2
  15  -8   6 3024.48 672.197   2
  16  -8   6-387.683 517.453   2
 -17   8  -6 9950.98 1219.80   4
  20  -9  -6 1681.44 541.875   2
 -20   9   6 1166.97 533.593   4
  19  -9  -6 11841.2 1245.24   2
 -19   9   6 11403.1 1246.72   4
  18  -9  -6 9482.03 1098.18   2
  17  -9  -6 11199.1 1150.49   2
  16  -9  -6 1263.42 480.879   2
  15  -9  -6 28828.7 1722.32   2
  14  -9  -6 11978.8 1066.94   2
  13  -9  -6 10162.8 958.872   2
  12  -9  -6 8710.98 828.830   2
  11  -9  -6 163.726 267.647   2
  10  -9  -6 41942.6 1735.35   2
 -10   9   6 37603.6 1088.67   3
   9  -9  -6 18470.0 1087.46   2
  -9   9   6 17156.6 624.592   3
   8  -9  -6 66362.3 2141.18   2
   8   9  -6 67025.5 2322.28   5
  -8   9   6 62057.5 1471.13   3
   7   9  -6 707.154 347.356   5
   7  -9  -6 656.644 228.302   2
  -7   9   6 692.080 125.688   3
  -6   9   6 13468.7 526.960   3
   6  -9  -6 14084.9 817.249   2
   6   9  -6 14887.5 990.670   5
  -5   9   6 6263.46 360.901   3
  -5   9   6 7274.62 524.264   6
   5  -9  -6 6443.18 518.450   2
   5   9  -6 6571.64 658.505   5
  -5  -9   6 5916.21 474.058   6
  -4   9   6 54219.5 1212.73   5
   4  -9  -6 58314.9 1700.41   2
   4   9  -6 59442.2 2109.17   5
  -4   9   6 60810.5 1498.23   3
  -4   9   6 60094.2 1707.76   6
  -4  -9   6 59242.1 1689.38   6
  -3  -9   6 1151.69 233.840   6
   3  -9  -6 955.968 196.582   2
   3   9  -6 780.307 291.536   5
  -3   9   6 512.531 173.674   6
  -3   9   6 1032.97 185.902   3
   2  -9  -6 16010.9 713.664   2
   2   9  -6 14479.8 981.901   5
  -2   9   6 15301.1 716.454   3
  -1   9   6 4884.17 425.192   3
   1   9  -6 5224.88 626.494   5
  -1  -9   6 4212.47 463.212   3
   1  -9  -6 5749.50 399.067   2
   0   9   6 166276. 3750.81   3
   0   9  -6 158808. 4213.06   5
   0  -9  -6 167983. 3446.34   2
   0  -9   6 160074. 3859.07   3
   1   9   6 222.126 190.880   3
   1  -9   6 370.015 257.741   2
   1  -9   6 56.0879 180.995   3
   2   9   6 9946.26 712.464   3
   2  -9   6 9474.80 822.569   2
   2  -9   6 9199.58 664.113   3
   3  -9   6 8393.90 636.317   3
   3   9   6 8815.85 695.128   3
   3  -9   6 8524.11 781.310   2
   4  -9   6 6031.12 548.406   3
   4   9   6 5771.67 598.943   3
   4  -9   6 6386.50 711.660   2
   5  -9   6 21798.0 1092.04   3
   5   9   6 21585.3 1217.63   3
   5  -9   6 20986.4 1320.09   2
   6  -9   6 74531.0 2731.83   2
   6  -9   6 75800.2 2345.31   3
   6   9   6 73119.3 2565.67   3
   7  -9   6 21589.7 1441.18   2
   7  -9   6 22891.3 1187.58   3
   7   9   6 21548.8 1326.32   3
   8  -9   6 806.903 380.843   2
   8  -9   6 1248.09 314.099   3
   8   9   6 1897.35 445.421   3
   9  -9   6 15573.9 1253.80   2
   9  -9   6 17449.9 1083.96   3
  10  -9   6 30389.9 1533.62   3
  10  -9   6 28920.3 1770.99   2
  11  -9   6 29806.1 1847.93   2
  11  -9   6 27048.9 1481.06   3
  12  -9   6-81.4297 298.383   3
  12  -9   6 880.841 506.654   2
  13  -9   6 535.617 460.756   2
  14  -9   6 157.546 390.485   2
  15  -9   6 38170.9 2324.91   2
  16  -9   6 2234.77 603.737   2
  20 -10  -6 2945.60 736.383   2
 -20  10   6 1967.99 576.906   4
  19 -10  -6 1045.12 456.678   2
  18 -10  -6 9910.09 1119.29   2
  17 -10  -6 8175.54 1007.19   2
  16 -10  -6 920.286 344.407   2
  15 -10  -6 49829.3 2342.18   2
  14 -10  -6 38948.7 1986.14   2
  13 -10  -6 382.167 325.502   2
  12 -10  -6 4433.35 609.897   2
  11 -10  -6-724.659 417.790   2
  10 -10  -6 36989.7 1693.43   2
   9 -10  -6 82202.8 2625.64   2
   8  10  -6 31842.5 1599.46   5
   8 -10  -6 34580.7 1500.50   2
   7 -10  -6 78044.9 2311.58   2
   7  10  -6 77949.0 2543.68   5
  -6 -10   6 10307.8 643.984   6
  -6  10   6 10032.9 394.360   3
   6  10  -6 9077.05 803.420   5
   6 -10  -6 10796.0 736.290   2
  -6  10   6 11032.2 675.618   6
  -5  10   6 8750.31 406.898   3
   5  10  -6 9168.92 814.856   5
  -5  10   6 9083.77 598.544   6
   5 -10  -6 9652.65 672.317   2
  -5 -10   6 10413.9 621.953   6
   4  10  -6 26544.9 1365.21   5
  -4  10   6 23418.3 980.840   6
   4 -10  -6 27472.3 1112.96   2
  -4  10   6 24507.1 712.625   5
  -4 -10   6 25549.7 1005.56   6
  -4  10   6 26659.0 845.465   3
   3 -10  -6 11658.3 675.839   2
  -3  10   6 11821.2 508.399   5
  -3  10   6 13400.3 689.170   6
  -3 -10   6 11231.5 637.046   6
  -3  10   6 11740.5 573.284   3
   3  10  -6 10704.9 867.508   5
   2  10  -6 100800. 3036.91   5
  -2  10   6 96748.5 2362.31   3
   2 -10  -6 99698.7 2454.35   2
   1  10  -6 12136.3 946.272   5
  -1  10   6 10716.4 633.142   3
  -1 -10   6 11200.3 757.121   3
   1 -10  -6 10342.0 607.834   2
   0 -10  -6 2454.35 296.797   2
   0  10  -6 2200.96 456.681   5
   0 -10   6 3062.71 413.082   3
   1 -10   6 21061.6 1273.98   2
   1 -10   6 20105.5 1008.47   3
   1  10   6 19861.8 991.498   3
   2  10   6 58643.7 1927.51   3
   2 -10   6 54793.3 2235.49   2
   2 -10   6 57461.9 1872.48   3
   3  10   6 527.030 230.931   3
   3 -10   6 1227.01 269.474   3
   3 -10   6 729.589 339.694   2
   4 -10   6 180.978 304.659   2
   4 -10   6-138.511 252.750   3
   4  10   6-69.1268 244.390   3
   5 -10   6 1486.32 382.349   2
   5  10   6 2202.05 424.349   3
   5 -10   6 1909.88 323.785   3
   6  10   6 2851.07 510.502   3
   6 -10   6 3173.89 594.427   2
   6 -10   6 3292.60 459.174   3
   7 -10   6 114407. 3750.52   2
   7  10   6 118686. 3570.11   3
   7 -10   6 115012. 3177.63   3
   8 -10   6 15533.2 1255.75   2
   8 -10   6 16151.6 1024.22   3
   9 -10   6 33837.7 1561.01   3
   9 -10   6 35995.8 1961.71   2
  10 -10   6 953.028 422.303   2
  10 -10   6 602.354 246.722   3
  11 -10   6 6173.90 883.271   2
  12 -10   6 47996.3 2491.58   2
  13 -10   6 7327.26 1005.68   2
  14 -10   6 25800.9 1896.79   2
  15 -10   6 18804.6 1653.01   2
  20 -11  -6-223.422 440.699   2
  19 -11  -6 809.073 505.055   2
  18 -11  -6 5045.75 853.788   2
  17 -11  -6 398.157 393.315   2
  16 -11  -6 9782.58 1076.88   2
  15 -11  -6-118.866 388.359   2
  14 -11  -6 37953.9 1995.37   2
  13 -11  -6 8471.02 891.329   2
  12 -11  -6 23820.8 1459.39   2
  11 -11  -6 5929.92 720.772   2
  10 -11  -6 22270.4 1324.81   2
   9  11  -6 34018.0 1726.68   5
   9 -11  -6 34193.5 1592.91   2
   8 -11  -6 30007.3 1436.33   2
   8  11  -6 29089.9 1544.86   5
   7 -11  -6 60065.0 2090.02   2
   7  11  -6 59222.4 2282.24   5
   6 -11  -6 22270.0 1138.74   2
  -6  11   6 22540.9 996.575   6
   6  11  -6 22712.6 1328.47   5
  -6 -11   6 22538.1 985.115   6
   5 -11  -6 123827. 3194.94   2
  -5 -11   6 129369. 2966.06   6
  -5  11   6 127848. 2969.59   6
   5  11  -6 124380. 3606.30   5
  -5  11   6 121241. 2466.32   3
   4 -11  -6 76467.8 2218.84   2
  -4 -11   6 72381.0 1990.71   6
  -4  11   6 72169.9 1987.91   6
  -4  11   6 75089.3 1692.55   5
  -4  11   6 74806.5 1726.12   3
   4  11  -6 77642.4 2597.50   5
   3 -11  -6 41556.9 1488.80   2
  -3  11   6 44647.3 1223.64   5
   3  11  -6 40865.1 1833.21   5
  -3  11   6 43122.9 1243.48   3
   2 -11  -6 1266.22 267.915   2
   2  11  -6 1092.77 390.409   5
  -2  11   6 1352.08 231.549   3
   1  11  -6 190521. 4887.85   5
  -1  11   6 194779. 4163.01   3
  -1 -11   6 189392. 4438.99   3
   1 -11  -6 192965. 4218.62   2
   0  11   6 66744.8 1925.53   3
   0  11  -6 59927.6 2327.53   5
   0 -11  -6 60997.5 1811.45   2
   0 -11   6 62974.8 2015.10   3
  -1 -11  -6 59079.6 1790.83   2
   1  11   6 65058.6 1995.73   3
   1 -11   6 67034.9 2478.15   2
   1 -11   6 65379.8 2020.54   3
   2  11   6 551.362 231.205   3
   2 -11   6 239.891 280.776   2
   3 -11   6 73338.0 2222.52   3
   3  11   6 75849.2 2378.21   3
   3 -11   6 71959.0 2708.64   2
   4 -11   6 92825.7 2593.27   3
   4  11   6 91687.0 2805.34   3
   4 -11   6 87078.0 3080.77   2
   5 -11   6 7766.48 864.879   2
   5 -11   6 8654.67 677.635   3
   5  11   6 9563.15 825.672   3
   6 -11   6 26619.8 1623.49   2
   6 -11   6 26893.9 1264.28   3
   7 -11   6 10132.7 770.173   3
   7 -11   6 9896.80 1043.25   2
   8 -11   6 42553.9 2172.50   2
   8 -11   6 42664.6 1710.59   3
   9 -11   6 5713.19 821.226   2
  10 -11   6 9298.34 1065.83   2
  11 -11   6 1107.90 477.915   2
  12 -11   6 13162.9 1320.02   2
  13 -11   6 66.2309 442.703   2
  14 -11   6 1490.82 596.284   2
  15 -11   6 6340.90 1052.38   2
  19 -12  -6 1110.03 559.699   2
  18 -12  -6-171.406 453.939   2
  17 -12  -6 3092.52 699.824   2
  16 -12  -6 19215.2 1512.55   2
  15 -12  -6 351.941 355.337   2
  14 -12  -6 12623.9 1182.74   2
  13 -12  -6 15960.8 1257.64   2
  12 -12  -6 268.396 336.551   2
  11 -12  -6 53487.2 2262.12   2
  10  12  -6 767.365 379.630   5
  10 -12  -6 1230.53 337.707   2
   9 -12  -6 12990.8 1000.56   2
   9  12  -6 12962.8 1078.21   5
   8 -12  -6 78598.8 2622.41   2
   8  12  -6 79055.1 2836.11   5
   7  12  -6 10284.1 922.993   5
   7 -12  -6 11964.2 876.412   2
  -7 -12   6 10139.9 657.913   6
  -7  12   6 10278.2 673.602   6
  -6 -12   6 132748. 3071.29   6
   6 -12  -6 134458. 3496.10   2
   6  12  -6 135833. 3836.15   5
   5  12  -6-5.84292 308.171   5
  -5 -12   6 154.808 161.224   6
   5 -12  -6-221.064 342.492   2
  -5  12   6-145.059 186.230   6
  -4 -12   6 503.989 185.848   6
   4 -12  -6 637.123 254.014   2
  -4  12   6 525.512 175.854   6
   4  12  -6 487.144 316.709   5
  -4  12   6 525.433 141.740   5
   3 -12  -6 72700.7 2177.80   2
   3  12  -6 70663.1 2554.39   5
  -3  12   6 69518.1 1777.39   5
   2 -12  -6 12783.8 785.025   2
   2  12  -6 13280.0 1042.56   5
  -1  12   6 40492.3 1375.83   3
   1  12  -6 43064.4 1926.54   5
  -1 -12   6 41724.8 1599.63   3
   1 -12  -6 43246.0 1514.49   2
   0  12   6 1457.72 264.877   3
   0 -12  -6 1878.09 308.419   2
   0 -12   6 1530.34 323.703   3
   0  12  -6 1464.68 451.133   5
  -1  12  -6 14901.7 1138.79   5
   1  12   6 16084.5 894.728   3
  -1 -12  -6 15678.2 846.338   2
   1 -12   6 16108.7 1199.93   2
   1 -12   6 16275.0 919.673   3
   2 -12   6 28986.6 1637.26   2
   2 -12   6 30125.6 1285.76   3
   3 -12   6 39626.7 1508.56   3
   3 -12   6 38421.0 1938.30   2
   4 -12   6 4753.58 683.309   2
   4 -12   6 2866.57 380.331   3
   5 -12   6-113.009 245.803   3
   5 -12   6 311.399 310.754   2
   6 -12   6 32837.6 1848.24   2
   6 -12   6 32660.3 1390.15   3
   7 -12   6 162.307 351.365   2
   8 -12   6 44313.6 2282.53   2
   9 -12   6 6451.63 907.158   2
  10 -12   6 5161.05 839.152   2
  11 -12   6 33549.5 2083.76   2
  12 -12   6-1196.98 536.401   2
  13 -12   6 12160.3 1327.34   2
  14 -12   6 1987.66 627.525   2
  19 -13  -6 14033.0 1444.00   2
  18 -13  -6-60.3105 420.496   2
  17 -13  -6 19510.5 1592.79   2
  16 -13  -6 31518.4 1998.86   2
  15 -13  -6 3410.11 685.165   2
  14 -13  -6 7344.70 894.725   2
  13 -13  -6 1844.51 492.872   2
  12 -13  -6 964.989 363.152   2
  11  13  -6 18638.4 1372.69   5
  11 -13  -6 18113.0 1290.79   2
  10  13  -6-244.972 345.013   5
  10 -13  -6-80.6675 338.498   2
   9  13  -6 236.984 390.946   5
   9 -13  -6 640.729 337.283   2
  -8  13   6 47.9672 197.536   6
   8 -13  -6 21.3691 332.103   2
   8  13  -6-294.056 353.009   5
  -7 -13   6 37225.7 1333.70   6
   7  13  -6 35905.3 1822.27   5
   7 -13  -6 36619.9 1667.80   2
  -7  13   6 36803.2 1341.56   6
  -6 -13   6 23168.8 963.969   6
   6 -13  -6 21709.3 1205.69   2
   6  13  -6 21894.5 1382.04   5
  -6  13   6 21627.8 943.890   6
  -5 -13   6 2086.20 287.641   6
  -5  13   6 1476.52 258.875   6
   5  13  -6 1787.93 424.737   5
   5 -13  -6 1507.07 358.364   2
   4 -13  -6 6655.17 634.313   2
   4  13  -6 6723.84 765.601   5
   3 -13  -6 1402.31 311.588   2
  -3  13   6 1029.43 197.344   5
   3  13  -6 1450.82 455.018   5
  -2  13   6 9912.48 610.573   5
   2  13  -6 9026.26 892.878   5
   2 -13  -6 10785.7 759.834   2
   1  13  -6 87259.4 3004.29   5
  -1 -13   6 84013.0 2528.36   3
   1 -13  -6 87629.2 2496.65   2
   0  13  -6 7435.95 827.860   5
   0 -13   6 6148.87 781.700   2
   0 -13  -6 7291.94 614.215   2
   0 -13   6 7395.45 629.999   3
  -1  13  -6 7370.60 825.506   5
  -1 -13  -6 7345.67 612.213   2
   1 -13   6 7440.77 861.923   2
   1 -13   6 6915.07 607.241   3
   2 -13   6 1185.38 293.462   3
   2 -13   6 1286.93 406.784   2
   3 -13   6 3973.58 450.861   3
   3 -13   6 3711.57 641.157   2
   4 -13   6 16252.7 915.793   3
   4 -13   6 16255.1 1299.37   2
   5 -13   6 16849.5 1336.71   2
   6 -13   6 2222.18 491.662   2
   7 -13   6 31294.9 1916.06   2
   8 -13   6 4110.75 729.894   2
   9 -13   6 6641.17 962.550   2
  10 -13   6 6673.82 965.684   2
  11 -13   6 4240.54 786.414   2
  12 -13   6 7487.99 1048.69   2
  13 -13   6-333.446 562.596   2
  18 -14  -6 1685.37 617.703   2
  17 -14  -6 3259.13 721.339   2
  16 -14  -6 5907.28 903.350   2
  15 -14  -6 8140.88 1022.83   2
  14 -14  -6-249.787 435.826   2
  13 -14  -6-130.180 364.923   2
  12  14  -6 32472.6 1922.41   5
  12 -14  -6 32174.2 1857.10   2
  11  14  -6 28151.0 1761.27   5
  11 -14  -6 28763.8 1677.93   2
  10  14  -6 1643.12 456.102   5
  10 -14  -6 1716.81 470.473   2
   9 -14  -6 2534.12 518.140   2
   9  14  -6 2371.33 541.265   5
   8  14  -6 6544.82 795.137   5
   8 -14  -6 7158.53 760.115   2
   7  14  -6 634.994 387.038   5
   7 -14  -6 96.0518 305.017   2
   6 -14  -6 56624.1 2153.13   2
   6  14  -6 58191.1 2425.78   5
   5 -14  -6 7832.53 739.085   2
   5  14  -6 7974.29 870.391   5
   4 -14  -6 1455.18 368.713   2
   4  14  -6 162.953 343.722   5
   3 -14  -6 491.721 240.144   2
   3  14  -6 306.933 320.680   5
   2  14  -6 46678.7 2138.91   5
   2 -14  -6 49114.3 1825.74   2
   1 -14  -6 153.608 203.807   2
  -1  14   6 281.667 197.624   5
   1  14  -6 99.5151 316.720   5
  -1 -14   6 724.105 262.687   3
   0 -14  -6 28044.1 1295.88   2
   0 -14   6 27502.8 1268.01   3
   0 -14   6 29810.2 1736.81   2
   0  14  -6 28765.5 1632.28   5
   1 -14   6 311.759 225.579   3
  -1  14  -6 423.548 311.248   5
   1 -14   6-151.056 370.496   2
  -1 -14  -6 451.132 238.260   2
  -2 -14  -6 17392.6 996.825   2
   2 -14   6 16099.9 1299.78   2
   2 -14   6 16069.3 924.200   3
   3 -14   6 15848.4 1293.93   2
   4 -14   6 41056.0 2145.89   2
   5 -14   6 1708.90 429.867   2
   6 -14   6 3214.93 645.052   2
   7 -14   6 2412.56 573.474   2
   8 -14   6 7192.30 964.243   2
   9 -14   6 12597.1 1280.75   2
  10 -14   6 8483.09 1115.58   2
  11 -14   6 6011.08 977.478   2
  12 -14   6 4953.89 925.663   2
  17 -15  -6-305.148 532.566   2
  16 -15  -6 1158.38 465.451   2
  15 -15  -6 331.322 393.590   2
  14 -15  -6 35156.7 2085.89   2
  13  15  -6 5455.60 883.423   5
  13 -15  -6 5583.23 843.060   2
  12  15  -6 220.957 342.455   5
  12 -15  -6 406.817 387.314   2
  11  15  -6 279.583 434.197   5
  11 -15  -6 572.503 384.348   2
  10  15  -6 37266.6 2058.34   5
  10 -15  -6 38849.1 1994.49   2
[truncated: 541,503 more chars]
