# Supplementary material
Source: MDPI journal article supplement (https://www.mdpi.com/2304-6740/11/6/255)
Supplement: s1 [file s1 › cif/asm226.cif]

data_asm226
_audit_creation_date               2023-05-20
_audit_creation_method
;
Olex2 1.5
(compiled 2022.04.07 svn.rca3783a0 for OlexSys, GUI svn.r6498)
;
_shelx_SHELXL_version_number       '2018/3'
_audit_contact_author_address      ?
_audit_contact_author_email        ?
_audit_contact_author_name         ''
_audit_contact_author_phone        ?
_publ_contact_author_id_orcid      ?
_publ_section_references
;
Dolomanov, O.V., Bourhis, L.J., Gildea, R.J, Howard, J.A.K. & Puschmann, H.
 (2009), J. Appl. Cryst. 42, 339-341.

Sheldrick, G.M. (2015). Acta Cryst. C71, 3-8.
;
_chemical_name_common              ?
_chemical_name_systematic          ?
_chemical_formula_moiety           'C39 H38 Br2 N6 Pd2 S, C H Cl3'
_chemical_formula_sum              'C40 H39 Br2 Cl3 N6 Pd2 S'
_chemical_formula_weight           1114.80
_chemical_melting_point            ?
_chemical_oxdiff_formula           'Pd Br2 N6 C40 H40'
loop_
  _atom_type_symbol
  _atom_type_description
  _atom_type_scat_dispersion_real
  _atom_type_scat_dispersion_imag
  _atom_type_scat_source
 'C' 'C' 0.0033 0.0016 'International Tables Vol C Tables 4.2.6.8 and 6.1.1.4'
 'H' 'H' 0.0000 0.0000 'International Tables Vol C Tables 4.2.6.8 and 6.1.1.4'
 'Br' 'Br' -0.2901 2.4595
 'International Tables Vol C Tables 4.2.6.8 and 6.1.1.4'
 'Cl' 'Cl' 0.1484 0.1585 'International Tables Vol C Tables 4.2.6.8 and 6.1.1.4'
 'N' 'N' 0.0061 0.0033 'International Tables Vol C Tables 4.2.6.8 and 6.1.1.4'
 'Pd' 'Pd' -0.9988 1.0072
 'International Tables Vol C Tables 4.2.6.8 and 6.1.1.4'
 'S' 'S' 0.1246 0.1234 'International Tables Vol C Tables 4.2.6.8 and 6.1.1.4'

_shelx_space_group_comment
;
The symmetry employed for this shelxl refinement is uniquely defined
by the following loop, which should always be used as a source of
symmetry information in preference to the above space-group names.
They are only intended as comments.
;
_space_group_crystal_system        'monoclinic'
_space_group_IT_number             14
_space_group_name_H-M_alt          'P 1 21/c 1'
_space_group_name_Hall             '-P 2ybc'
loop_
  _space_group_symop_operation_xyz
 'x, y, z'
 '-x, y+1/2, -z+1/2'
 '-x, -y, -z'
 'x, -y-1/2, z-1/2'

_cell_length_a                     8.15286(19)
_cell_length_b                     18.9330(4)
_cell_length_c                     28.0248(7)
_cell_angle_alpha                  90
_cell_angle_beta                   95.618(2)
_cell_angle_gamma                  90
_cell_volume                       4305.07(17)
_cell_formula_units_Z              4
_cell_measurement_reflns_used      9395
_cell_measurement_temperature      100(2)
_cell_measurement_theta_max        30.9429
_cell_measurement_theta_min        2.6750
_shelx_estimated_absorpt_T_max     ?
_shelx_estimated_absorpt_T_min     ?
_exptl_absorpt_coefficient_mu      2.963
_exptl_absorpt_correction_t_max    1.00000
_exptl_absorpt_correction_t_min    0.88791
_exptl_absorpt_correction_type     multi-scan
_exptl_absorpt_process_details
;
CrysAlisPro, Agilent Technologies,
Version 1.171.36.20 (release 27-06-2012 CrysAlis171 .NET)
(compiled Jul 11 2012,15:38:31)
Empirical absorption correction using spherical harmonics,
 implemented in SCALE3 ABSPACK scaling algorithm.
;
_exptl_absorpt_special_details     ?
_exptl_crystal_colour              'clear light yellow'
_exptl_crystal_colour_lustre       clear
_exptl_crystal_colour_modifier     light
_exptl_crystal_colour_primary      yellow
_exptl_crystal_density_diffrn      1.720
_exptl_crystal_density_meas        ?
_exptl_crystal_density_method      ?
_exptl_crystal_description         prism
_exptl_crystal_F_000               2200
_exptl_crystal_size_max            0.2
_exptl_crystal_size_mid            0.2
_exptl_crystal_size_min            0.2
_exptl_transmission_factor_max     ?
_exptl_transmission_factor_min     ?
_diffrn_reflns_av_R_equivalents    0.0369
_diffrn_reflns_av_unetI/netI       0.0258
_diffrn_reflns_Laue_measured_fraction_full  0.999
_diffrn_reflns_Laue_measured_fraction_max  0.999
_diffrn_reflns_limit_h_max         10
_diffrn_reflns_limit_h_min         -10
_diffrn_reflns_limit_k_max         24
_diffrn_reflns_limit_k_min         -24
_diffrn_reflns_limit_l_max         36
_diffrn_reflns_limit_l_min         -36
_diffrn_reflns_number              57722
_diffrn_reflns_point_group_measured_fraction_full  0.999
_diffrn_reflns_point_group_measured_fraction_max  0.999
_diffrn_reflns_theta_full          25.242
_diffrn_reflns_theta_max           27.500
_diffrn_reflns_theta_min           2.731
_diffrn_ambient_temperature        100(2)
_diffrn_detector_area_resol_mean   16.2096
_diffrn_measured_fraction_theta_full  0.999
_diffrn_measured_fraction_theta_max  0.999
_diffrn_measurement_details
;
  1 omega  -39.00   24.00   1.0000   54.0000
omega____ theta____ kappa____ phi______ frames
    -      -22.2468   77.0000  -60.0000 63

  2 omega  -25.00    0.00   1.0000   54.0000
omega____ theta____ kappa____ phi______ frames
    -      -22.2468  -99.0000 -120.0000 25

  3 omega  -17.00   20.00   1.0000   54.0000
omega____ theta____ kappa____ phi______ frames
    -      -22.2468  -99.0000   60.0000 37

  4 omega  -20.00   20.00   1.0000   54.0000
omega____ theta____ kappa____ phi______ frames
    -      -22.2468  -99.0000  120.0000 40

  5 omega  -33.00    5.00   1.0000   54.0000
omega____ theta____ kappa____ phi______ frames
    -       23.3406  -57.0000   90.0000 38

  6 omega  -21.00   49.00   1.0000   54.0000
omega____ theta____ kappa____ phi______ frames
    -       23.3406   19.0000 -120.0000 70

  7 omega   -2.00   73.00   1.0000   54.0000
omega____ theta____ kappa____ phi______ frames
    -       23.3406   38.0000  -90.0000 75
;
_diffrn_measurement_device_type    'Xcalibur, Eos'
_diffrn_measurement_method         '\w scans'
_diffrn_orient_matrix_ub_11        -0.0240902000
_diffrn_orient_matrix_ub_12        -0.0357909000
_diffrn_orient_matrix_ub_13        -0.0032858000
_diffrn_orient_matrix_ub_21        -0.0290033000
_diffrn_orient_matrix_ub_22        -0.0001938000
_diffrn_orient_matrix_ub_23        0.0230443000
_diffrn_orient_matrix_ub_31        -0.0788471000
_diffrn_orient_matrix_ub_32        0.0109931000
_diffrn_orient_matrix_ub_33        -0.0102445000
_diffrn_radiation_monochromator    graphite
_diffrn_radiation_type             MoK\a
_diffrn_radiation_wavelength       0.71073
_diffrn_source                     'Enhance (Mo) X-ray Source'
_reflns_Friedel_coverage           0.000
_reflns_Friedel_fraction_full      .
_reflns_Friedel_fraction_max       .
_reflns_number_gt                  8712
_reflns_number_total               9898
_reflns_special_details
;
 Reflections were merged by SHELXL according to the crystal
 class for the calculation of statistics and refinement.
 
 _reflns_Friedel_fraction is defined as the number of unique
 Friedel pairs measured divided by the number that would be
 possible theoretically, ignoring centric projections and
 systematic absences.
;
_reflns_threshold_expression       'I > 2\s(I)'
_computing_cell_refinement
;
CrysAlisPro, Agilent Technologies,
Version 1.171.36.20 (release 27-06-2012 CrysAlis171 .NET)
(compiled Jul 11 2012,15:38:31)
;
_computing_data_collection
;
CrysAlisPro, Agilent Technologies,
Version 1.171.36.20 (release 27-06-2012 CrysAlis171 .NET)
(compiled Jul 11 2012,15:38:31)
;
_computing_data_reduction
;
CrysAlisPro, Agilent Technologies,
Version 1.171.36.20 (release 27-06-2012 CrysAlis171 .NET)
(compiled Jul 11 2012,15:38:31)
;
_computing_molecular_graphics      'Olex2 1.5 (Dolomanov et al., 2009)'
_computing_publication_material    'Olex2 1.5 (Dolomanov et al., 2009)'
_computing_structure_refinement    'SHELXL 2018/3 (Sheldrick, 2015)'
_computing_structure_solution
;
Superflip (Palatinus & Chapuis, 2007;Palatinus & van der Lee, 2008;
Palatinus et al., 2012)
;
_refine_diff_density_max           0.710
_refine_diff_density_min           -0.860
_refine_diff_density_rms           0.089
_refine_ls_extinction_coef         .
_refine_ls_extinction_method       none
_refine_ls_goodness_of_fit_ref     1.072
_refine_ls_hydrogen_treatment      constr
_refine_ls_matrix_type             full
_refine_ls_number_parameters       495
_refine_ls_number_reflns           9898
_refine_ls_number_restraints       0
_refine_ls_R_factor_all            0.0334
_refine_ls_R_factor_gt             0.0264
_refine_ls_restrained_S_all        1.072
_refine_ls_shift/su_max            0.005
_refine_ls_shift/su_mean           0.000
_refine_ls_structure_factor_coef   Fsqd
_refine_ls_weighting_details      
 'w=1/[\s^2^(Fo^2^)+(0.0209P)^2^+6.6600P] where P=(Fo^2^+2Fc^2^)/3'
_refine_ls_weighting_scheme        calc
_refine_ls_wR_factor_gt            0.0573
_refine_ls_wR_factor_ref           0.0600
_refine_special_details            ?
_olex2_refinement_description
;
1.a Ternary CH refined with riding coordinates:
 C1S(H1S)
1.b Aromatic/amide H refined with riding coordinates:
 C39(H39), C16(H16), C17(H17), C7(H7), C8(H8), C31(H31), C38(H38), C9(H9),
 C23(H23), C15(H15), C24(H24), C25(H25), C33(H33), C32(H32)
1.c Idealised Me refined as rotating group:
 C19(H19A,H19B,H19C), C20(H20A,H20B,H20C), C27(H27A,H27B,H27C), C35(H35A,H35B,
 H35C), C12(H12A,H12B,H12C), C11(H11A,H11B,H11C), C28(H28A,H28B,H28C), C36(H36A,
 H36B,H36C)
;
_atom_sites_solution_hydrogens     geom
_atom_sites_solution_primary       dual
_atom_sites_solution_secondary     ?
loop_
  _atom_site_label
  _atom_site_type_symbol
  _atom_site_fract_x
  _atom_site_fract_y
  _atom_site_fract_z
  _atom_site_U_iso_or_equiv
  _atom_site_adp_type
  _atom_site_occupancy
  _atom_site_site_symmetry_order
  _atom_site_calc_flag
  _atom_site_refinement_flags_posn
  _atom_site_refinement_flags_adp
  _atom_site_refinement_flags_occupancy
  _atom_site_disorder_assembly
  _atom_site_disorder_group
 Pd2 Pd 0.36456(2) 0.60112(2) 0.81028(2) 0.01068(5) Uani 1 1 d . . . . .
 Pd1 Pd 0.36023(2) 0.66376(2) 0.64133(2) 0.01062(5) Uani 1 1 d . . . . .
 Br2 Br 0.15752(3) 0.51353(2) 0.83403(2) 0.01979(6) Uani 1 1 d . . . . .
 Br1 Br 0.34976(3) 0.70472(2) 0.55732(2) 0.02012(6) Uani 1 1 d . . . . .
 S1 S 0.69977(8) 0.79807(3) 0.73582(2) 0.01560(13) Uani 1 1 d . . . . .
 Cl3S Cl 0.88533(11) 0.34994(6) 0.87215(3) 0.0461(2) Uani 1 1 d . . . . .
 Cl1S Cl 0.78240(13) 0.33142(5) 0.77149(3) 0.0500(3) Uani 1 1 d . . . . .
 Cl2S Cl 0.65033(12) 0.44588(6) 0.82443(3) 0.0536(3) Uani 1 1 d . . . . .
 C18 C 0.2414(3) 0.48146(14) 0.70078(9) 0.0188(5) Uani 1 1 d . . . . .
 C19 C 0.4222(4) 0.46745(16) 0.69992(11) 0.0272(6) Uani 1 1 d . . . . .
 H19A H 0.439260 0.417482 0.692724 0.041 Uiso 1 1 calc R U . . .
 H19B H 0.480043 0.478943 0.731268 0.041 Uiso 1 1 calc R U . . .
 H19C H 0.465470 0.496770 0.675193 0.041 Uiso 1 1 calc R U . . .
 C26 C 0.4950(3) 0.76761(13) 0.88626(10) 0.0167(5) Uani 1 1 d . . . . .
 C20 C -0.0397(4) 0.63104(19) 0.73325(11) 0.0319(7) Uani 1 1 d . . . . .
 H20A H -0.004947 0.668231 0.712105 0.048 Uiso 1 1 calc R U . . .
 H20B H 0.009146 0.639655 0.766093 0.048 Uiso 1 1 calc R U . . .
 H20C H -0.160125 0.631207 0.732521 0.048 Uiso 1 1 calc R U . . .
 C27 C 0.9042(3) 0.68784(17) 0.85754(10) 0.0254(6) Uani 1 1 d . . . . .
 H27A H 1.005541 0.681679 0.878977 0.038 Uiso 1 1 calc R U . . .
 H27B H 0.925571 0.719474 0.831171 0.038 Uiso 1 1 calc R U . . .
 H27C H 0.867111 0.641865 0.844519 0.038 Uiso 1 1 calc R U . . .
 C39 C 0.6209(3) 0.78644(14) 0.64583(10) 0.0181(5) Uani 1 1 d . . . . .
 H39 H 0.613683 0.794188 0.612193 0.022 Uiso 1 1 calc R U . . .
 C16 C -0.0414(4) 0.44462(19) 0.68393(11) 0.0389(9) Uani 1 1 d . . . . .
 H16 H -0.119460 0.409710 0.672633 0.047 Uiso 1 1 calc R U . . .
 C17 C 0.1244(4) 0.43072(16) 0.68426(10) 0.0299(7) Uani 1 1 d . . . . .
 H17 H 0.159729 0.386346 0.673186 0.036 Uiso 1 1 calc R U . . .
 C5 C -0.0476(3) 0.52647(14) 0.57624(9) 0.0154(5) Uani 1 1 d . . . . .
 C35 C 0.8127(3) 0.54093(15) 0.94884(11) 0.0236(6) Uani 1 1 d . . . . .
 H35A H 0.919698 0.530486 0.966501 0.035 Uiso 1 1 calc R U . . .
 H35B H 0.825612 0.579013 0.925820 0.035 Uiso 1 1 calc R U . . .
 H35C H 0.770816 0.498553 0.931642 0.035 Uiso 1 1 calc R U . . .
 C6 C -0.1999(3) 0.55982(16) 0.57725(10) 0.0218(6) Uani 1 1 d . . . . .
 C12 C -0.2118(4) 0.63302(18) 0.59697(12) 0.0329(7) Uani 1 1 d . . . . .
 H12A H -0.188189 0.631813 0.631921 0.049 Uiso 1 1 calc R U . . .
 H12B H -0.323346 0.651410 0.588646 0.049 Uiso 1 1 calc R U . . .
 H12C H -0.131858 0.663703 0.583219 0.049 Uiso 1 1 calc R U . . .
 C7 C -0.3373(4) 0.52186(19) 0.55893(11) 0.0315(7) Uani 1 1 d . . . . .
 H7 H -0.443890 0.541940 0.559495 0.038 Uiso 1 1 calc R U . . .
 C8 C -0.3212(4) 0.45538(18) 0.53990(12) 0.0364(8) Uani 1 1 d . . . . .
 H8 H -0.416932 0.430043 0.527772 0.044 Uiso 1 1 calc R U . . .
 C31 C 0.7307(3) 0.55969(14) 1.03293(10) 0.0226(6) Uani 1 1 d . . . . .
 H31 H 0.835991 0.543138 1.045644 0.027 Uiso 1 1 calc R U . . .
 C34 C 0.4187(3) 0.60970(13) 0.99745(9) 0.0156(5) Uani 1 1 d . . . . .
 C1S C 0.8241(4) 0.39347(17) 0.81816(11) 0.0298(7) Uani 1 1 d . . . . .
 H1S H 0.916124 0.424771 0.810003 0.036 Uiso 1 1 calc R U . . .
 C11 C 0.1437(4) 0.42916(16) 0.55544(11) 0.0292(7) Uani 1 1 d . . . . .
 H11A H 0.209939 0.460122 0.536887 0.044 Uiso 1 1 calc R U . . .
 H11B H 0.134770 0.382422 0.540386 0.044 Uiso 1 1 calc R U . . .
 H11C H 0.196816 0.424701 0.588222 0.044 Uiso 1 1 calc R U . . .
 C38 C 0.7170(3) 0.82529(14) 0.67756(10) 0.0206(6) Uani 1 1 d . . . . .
 H38 H 0.785578 0.862898 0.669069 0.025 Uiso 1 1 calc R U . . .
 C22 C 0.7726(3) 0.71930(14) 0.88508(9) 0.0168(5) Uani 1 1 d . . . . .
 N6 N 0.4936(3) 0.59455(11) 0.91763(8) 0.0146(4) Uani 1 1 d . . . . .
 C3 C 0.1915(3) 0.59714(13) 0.61739(9) 0.0139(5) Uani 1 1 d . . . . .
 C14 C 0.0165(3) 0.56081(16) 0.71653(9) 0.0210(6) Uani 1 1 d . . . . .
 C9 C -0.1681(4) 0.42518(16) 0.53825(11) 0.0330(8) Uani 1 1 d . . . . .
 H9 H -0.159637 0.379759 0.524292 0.040 Uiso 1 1 calc R U . . .
 N1 N 0.5339(2) 0.73423(11) 0.66675(8) 0.0135(4) Uani 1 1 d . . . . .
 C23 C 0.7979(3) 0.72970(15) 0.93438(10) 0.0210(6) Uani 1 1 d . . . . .
 H23 H 0.901139 0.717396 0.951007 0.025 Uiso 1 1 calc R U . . .
 C15 C -0.0954(4) 0.5085(2) 0.69978(11) 0.0331(8) Uani 1 1 d . . . . .
 H15 H -0.210313 0.517201 0.699320 0.040 Uiso 1 1 calc R U . . .
 C1 C 0.3739(3) 0.64027(12) 0.71170(9) 0.0108(5) Uani 1 1 d . . . . .
 C28 C 0.3320(3) 0.78908(16) 0.86027(10) 0.0238(6) Uani 1 1 d . . . . .
 H28A H 0.272432 0.746882 0.847952 0.036 Uiso 1 1 calc R U . . .
 H28B H 0.351173 0.820334 0.833499 0.036 Uiso 1 1 calc R U . . .
 H28C H 0.266368 0.813983 0.882461 0.036 Uiso 1 1 calc R U . . .
 C30 C 0.6933(3) 0.56349(13) 0.98337(10) 0.0170(5) Uani 1 1 d . . . . .
 C24 C 0.6755(4) 0.75765(14) 0.95969(10) 0.0217(6) Uani 1 1 d . . . . .
 H24 H 0.693904 0.763279 0.993470 0.026 Uiso 1 1 calc R U . . .
 C25 C 0.5271(4) 0.77725(14) 0.93566(10) 0.0195(5) Uani 1 1 d . . . . .
 H25 H 0.444783 0.797743 0.953069 0.023 Uiso 1 1 calc R U . . .
 N2 N 0.4866(2) 0.68426(11) 0.73888(7) 0.0117(4) Uani 1 1 d . . . . .
 C29 C 0.5365(3) 0.58888(13) 0.96722(9) 0.0146(5) Uani 1 1 d . . . . .
 N3 N 0.2998(2) 0.59676(11) 0.73752(7) 0.0124(4) Uani 1 1 d . . . . .
 N4 N 0.5917(3) 0.72806(11) 0.81096(8) 0.0143(4) Uani 1 1 d . . . . .
 C2 C 0.5035(3) 0.67989(13) 0.79036(9) 0.0124(5) Uani 1 1 d . . . . .
 C37 C 0.5651(3) 0.73429(13) 0.71367(9) 0.0127(5) Uani 1 1 d . . . . .
 C4 C 0.4495(3) 0.60213(13) 0.87790(9) 0.0144(5) Uani 1 1 d . . . . .
 N5 N 0.0906(3) 0.56299(11) 0.59762(8) 0.0143(4) Uani 1 1 d . . . . .
 C10 C -0.0253(4) 0.46015(14) 0.55673(9) 0.0205(6) Uani 1 1 d . . . . .
 C21 C 0.6181(3) 0.73702(13) 0.86149(9) 0.0139(5) Uani 1 1 d . . . . .
 C33 C 0.4633(4) 0.60475(14) 1.04629(10) 0.0206(6) Uani 1 1 d . . . . .
 H33 H 0.387281 0.618798 1.068105 0.025 Uiso 1 1 calc R U . . .
 C32 C 0.6171(4) 0.57960(14) 1.06381(10) 0.0233(6) Uani 1 1 d . . . . .
 H32 H 0.644648 0.576015 1.097456 0.028 Uiso 1 1 calc R U . . .
 C13 C 0.1839(3) 0.54568(13) 0.71686(9) 0.0137(5) Uani 1 1 d . . . . .
 C36 C 0.2519(3) 0.63602(15) 0.97729(10) 0.0218(6) Uani 1 1 d . . . . .
 H36A H 0.264655 0.680465 0.960112 0.033 Uiso 1 1 calc R U . . .
 H36B H 0.182870 0.643944 1.003515 0.033 Uiso 1 1 calc R U . . .
 H36C H 0.199647 0.600796 0.955130 0.033 Uiso 1 1 calc R U . . .

loop_
  _atom_site_aniso_label
  _atom_site_aniso_U_11
  _atom_site_aniso_U_22
  _atom_site_aniso_U_33
  _atom_site_aniso_U_23
  _atom_site_aniso_U_13
  _atom_site_aniso_U_12
 Pd2 0.01229(9) 0.01177(9) 0.00777(9) 0.00060(7) -0.00015(7) -0.00160(7)
 Pd1 0.01293(9) 0.01104(9) 0.00775(9) -0.00018(7) 0.00028(7) -0.00198(7)
 Br2 0.02178(13) 0.01943(13) 0.01731(13) 0.00582(10) -0.00233(10) -0.00632(10)
 Br1 0.02807(14) 0.02166(13) 0.01024(12) 0.00175(10) -0.00004(10) -0.00699(11)
 S1 0.0178(3) 0.0148(3) 0.0138(3) -0.0011(2) -0.0004(2) -0.0065(2)
 Cl3S 0.0412(5) 0.0677(6) 0.0307(4) 0.0102(4) 0.0097(4) 0.0116(4)
 Cl1S 0.0623(6) 0.0545(6) 0.0355(5) -0.0131(4) 0.0158(4) -0.0342(5)
 Cl2S 0.0409(5) 0.0865(8) 0.0322(5) 0.0005(5) -0.0020(4) 0.0216(5)
 C18 0.0313(15) 0.0143(12) 0.0100(12) 0.0029(10) -0.0020(11) -0.0035(11)
 C19 0.0369(17) 0.0225(14) 0.0218(15) -0.0014(12) 0.0002(13) 0.0097(12)
 C26 0.0198(13) 0.0124(12) 0.0181(13) -0.0002(10) 0.0035(10) -0.0024(10)
 C20 0.0211(15) 0.053(2) 0.0217(15) -0.0017(14) 0.0000(12) 0.0133(14)
 C27 0.0159(13) 0.0400(17) 0.0206(14) -0.0013(13) 0.0036(11) -0.0004(12)
 C39 0.0205(13) 0.0182(13) 0.0155(13) 0.0042(10) 0.0006(10) -0.0065(10)
 C16 0.052(2) 0.042(2) 0.0197(15) 0.0091(14) -0.0111(15) -0.0378(17)
 C17 0.056(2) 0.0176(14) 0.0144(14) 0.0036(11) -0.0064(14) -0.0121(13)
 C5 0.0173(12) 0.0187(12) 0.0096(12) 0.0012(10) -0.0021(10) -0.0059(10)
 C35 0.0193(13) 0.0245(14) 0.0267(15) -0.0021(12) 0.0008(12) 0.0041(11)
 C6 0.0198(13) 0.0296(15) 0.0153(13) 0.0022(11) -0.0019(11) 0.0009(11)
 C12 0.0303(16) 0.0412(19) 0.0259(16) -0.0101(14) -0.0039(13) 0.0156(14)
 C7 0.0192(14) 0.050(2) 0.0245(16) 0.0088(15) -0.0034(12) -0.0054(13)
 C8 0.0331(17) 0.0403(19) 0.0321(18) 0.0110(15) -0.0148(14) -0.0217(15)
 C31 0.0242(14) 0.0165(13) 0.0246(15) -0.0022(11) -0.0099(12) 0.0041(11)
 C34 0.0204(13) 0.0132(12) 0.0129(12) 0.0010(10) -0.0007(10) -0.0018(10)
 C1S 0.0253(15) 0.0380(18) 0.0261(16) -0.0019(14) 0.0021(13) -0.0078(13)
 C11 0.0423(18) 0.0209(14) 0.0239(16) -0.0036(12) 0.0008(14) 0.0085(13)
 C38 0.0236(14) 0.0211(13) 0.0170(13) 0.0054(11) 0.0019(11) -0.0081(11)
 C22 0.0179(12) 0.0162(12) 0.0161(13) -0.0019(10) 0.0014(10) -0.0055(10)
 N6 0.0159(10) 0.0156(10) 0.0122(11) -0.0002(8) 0.0006(8) -0.0020(8)
 C3 0.0175(12) 0.0145(12) 0.0099(11) 0.0022(10) 0.0024(10) 0.0026(10)
 C14 0.0171(13) 0.0355(16) 0.0103(12) 0.0032(11) 0.0007(10) -0.0037(11)
 C9 0.053(2) 0.0184(14) 0.0251(16) 0.0023(12) -0.0107(15) -0.0136(14)
 N1 0.0157(10) 0.0129(10) 0.0121(10) -0.0002(8) 0.0024(8) -0.0028(8)
 C23 0.0223(14) 0.0225(14) 0.0171(13) 0.0001(11) -0.0039(11) -0.0056(11)
 C15 0.0227(15) 0.060(2) 0.0161(14) 0.0080(15) -0.0037(12) -0.0199(15)
 C1 0.0100(11) 0.0110(11) 0.0111(11) -0.0022(9) -0.0004(9) -0.0006(9)
 C28 0.0232(14) 0.0278(15) 0.0210(14) -0.0001(12) 0.0056(12) 0.0068(11)
 C30 0.0204(13) 0.0126(12) 0.0170(13) -0.0006(10) -0.0033(10) -0.0011(10)
 C24 0.0352(16) 0.0184(13) 0.0115(12) -0.0033(10) 0.0015(11) -0.0070(11)
 C25 0.0309(15) 0.0144(12) 0.0147(13) -0.0035(10) 0.0094(11) -0.0020(11)
 N2 0.0147(10) 0.0132(10) 0.0071(9) -0.0007(8) 0.0005(8) -0.0032(8)
 C29 0.0198(12) 0.0137(12) 0.0094(12) 0.0001(9) -0.0031(10) -0.0014(10)
 N3 0.0138(10) 0.0119(10) 0.0114(10) -0.0002(8) 0.0007(8) -0.0016(8)
 N4 0.0161(10) 0.0167(10) 0.0105(10) -0.0021(8) 0.0031(8) -0.0032(8)
 C2 0.0129(11) 0.0142(11) 0.0101(11) -0.0008(9) 0.0016(9) 0.0004(9)
 C37 0.0131(11) 0.0110(11) 0.0138(12) -0.0010(9) 0.0009(9) -0.0004(9)
 C4 0.0147(12) 0.0142(12) 0.0144(13) 0.0005(10) 0.0020(10) -0.0010(9)
 N5 0.0154(10) 0.0143(10) 0.0127(10) 0.0005(8) -0.0014(8) -0.0012(8)
 C10 0.0327(15) 0.0166(13) 0.0115(12) 0.0025(10) -0.0015(11) -0.0038(11)
 C21 0.0186(12) 0.0131(11) 0.0101(12) -0.0010(9) 0.0018(10) -0.0059(9)
 C33 0.0308(15) 0.0170(13) 0.0142(13) -0.0032(10) 0.0037(11) 0.0013(11)
 C32 0.0398(17) 0.0146(13) 0.0133(13) -0.0012(10) -0.0079(12) 0.0009(11)
 C13 0.0172(12) 0.0155(12) 0.0081(11) 0.0021(9) -0.0011(9) -0.0065(9)
 C36 0.0185(13) 0.0253(14) 0.0219(14) 0.0002(12) 0.0026(11) 0.0021(11)

_geom_special_details
;
 All esds (except the esd in the dihedral angle between two l.s. planes)
 are estimated using the full covariance matrix.  The cell esds are taken
 into account individually in the estimation of esds in distances, angles
 and torsion angles; correlations between esds in cell parameters are only
 used when they are defined by crystal symmetry.  An approximate (isotropic)
 treatment of cell esds is used for estimating esds involving l.s. planes.
;
loop_
  _geom_bond_atom_site_label_1
  _geom_bond_atom_site_label_2
  _geom_bond_distance
  _geom_bond_site_symmetry_2
  _geom_bond_publ_flag
 Pd2 Br2 2.5024(3) . ?
 Pd2 N3 2.057(2) . ?
 Pd2 C2 1.986(2) . ?
 Pd2 C4 1.953(3) . ?
 Pd1 Br1 2.4724(3) . ?
 Pd1 C3 1.937(3) . ?
 Pd1 N1 2.023(2) . ?
 Pd1 C1 2.014(2) . ?
 S1 C38 1.731(3) . ?
 S1 C37 1.707(2) . ?
 Cl3S C1S 1.752(3) . ?
 Cl1S C1S 1.766(3) . ?
 Cl2S C1S 1.752(3) . ?
 C18 C19 1.500(4) . ?
 C18 C17 1.401(4) . ?
 C18 C13 1.394(4) . ?
 C19 H19A 0.9800 . ?
 C19 H19B 0.9800 . ?
 C19 H19C 0.9800 . ?
 C26 C28 1.508(4) . ?
 C26 C25 1.395(4) . ?
 C26 C21 1.400(4) . ?
 C20 H20A 0.9800 . ?
 C20 H20B 0.9800 . ?
 C20 H20C 0.9800 . ?
 C20 C14 1.497(4) . ?
 C27 H27A 0.9800 . ?
 C27 H27B 0.9800 . ?
 C27 H27C 0.9800 . ?
 C27 C22 1.505(4) . ?
 C39 H39 0.9500 . ?
 C39 C38 1.345(4) . ?
 C39 N1 1.381(3) . ?
 C16 H16 0.9500 . ?
 C16 C17 1.376(5) . ?
 C16 C15 1.376(5) . ?
 C17 H17 0.9500 . ?
 C5 C6 1.396(4) . ?
 C5 N5 1.405(3) . ?
 C5 C10 1.389(4) . ?
 C35 H35A 0.9800 . ?
 C35 H35B 0.9800 . ?
 C35 H35C 0.9800 . ?
 C35 C30 1.500(4) . ?
 C6 C12 1.499(4) . ?
 C6 C7 1.387(4) . ?
 C12 H12A 0.9800 . ?
 C12 H12B 0.9800 . ?
 C12 H12C 0.9800 . ?
 C7 H7 0.9500 . ?
 C7 C8 1.378(5) . ?
 C8 H8 0.9500 . ?
 C8 C9 1.378(5) . ?
 C31 H31 0.9500 . ?
 C31 C30 1.394(4) . ?
 C31 C32 1.381(4) . ?
 C34 C29 1.398(4) . ?
 C34 C33 1.384(4) . ?
 C34 C36 1.506(4) . ?
 C1S H1S 1.0000 . ?
 C11 H11A 0.9800 . ?
 C11 H11B 0.9800 . ?
 C11 H11C 0.9800 . ?
 C11 C10 1.501(4) . ?
 C38 H38 0.9500 . ?
 C22 C23 1.391(4) . ?
 C22 C21 1.405(4) . ?
 N6 C29 1.403(3) . ?
 N6 C4 1.145(3) . ?
 C3 N5 1.146(3) . ?
 C14 C15 1.396(4) . ?
 C14 C13 1.394(4) . ?
 C9 H9 0.9500 . ?
 C9 C10 1.394(4) . ?
 N1 C37 1.315(3) . ?
 C23 H23 0.9500 . ?
 C23 C24 1.385(4) . ?
 C15 H15 0.9500 . ?
 C1 N2 1.407(3) . ?
 C1 N3 1.286(3) . ?
 C28 H28A 0.9800 . ?
 C28 H28B 0.9800 . ?
 C28 H28C 0.9800 . ?
 C30 C29 1.399(4) . ?
 C24 H24 0.9500 . ?
 C24 C25 1.377(4) . ?
 C25 H25 0.9500 . ?
 N2 C2 1.438(3) . ?
 N2 C37 1.377(3) . ?
 N3 C13 1.434(3) . ?
 N4 C2 1.265(3) . ?
 N4 C21 1.421(3) . ?
 C33 H33 0.9500 . ?
 C33 C32 1.385(4) . ?
 C32 H32 0.9500 . ?
 C36 H36A 0.9800 . ?
 C36 H36B 0.9800 . ?
 C36 H36C 0.9800 . ?

loop_
  _geom_angle_atom_site_label_1
  _geom_angle_atom_site_label_2
  _geom_angle_atom_site_label_3
  _geom_angle
  _geom_angle_site_symmetry_1
  _geom_angle_site_symmetry_3
  _geom_angle_publ_flag
 N3 Pd2 Br2 97.05(6) . . ?
 C2 Pd2 Br2 172.19(7) . . ?
 C2 Pd2 N3 81.35(9) . . ?
 C4 Pd2 Br2 86.14(7) . . ?
 C4 Pd2 N3 173.89(9) . . ?
 C4 Pd2 C2 96.18(10) . . ?
 C3 Pd1 Br1 85.25(7) . . ?
 C3 Pd1 N1 179.14(10) . . ?
 C3 Pd1 C1 99.49(10) . . ?
 N1 Pd1 Br1 94.94(6) . . ?
 C1 Pd1 Br1 174.36(7) . . ?
 C1 Pd1 N1 80.28(9) . . ?
 C37 S1 C38 88.63(12) . . ?
 C17 C18 C19 120.8(3) . . ?
 C13 C18 C19 121.5(2) . . ?
 C13 C18 C17 117.7(3) . . ?
 C18 C19 H19A 109.5 . . ?
 C18 C19 H19B 109.5 . . ?
 C18 C19 H19C 109.5 . . ?
 H19A C19 H19B 109.5 . . ?
 H19A C19 H19C 109.5 . . ?
 H19B C19 H19C 109.5 . . ?
 C25 C26 C28 121.0(2) . . ?
 C25 C26 C21 118.2(2) . . ?
 C21 C26 C28 120.8(2) . . ?
 H20A C20 H20B 109.5 . . ?
 H20A C20 H20C 109.5 . . ?
 H20B C20 H20C 109.5 . . ?
 C14 C20 H20A 109.5 . . ?
 C14 C20 H20B 109.5 . . ?
 C14 C20 H20C 109.5 . . ?
 H27A C27 H27B 109.5 . . ?
 H27A C27 H27C 109.5 . . ?
 H27B C27 H27C 109.5 . . ?
 C22 C27 H27A 109.5 . . ?
 C22 C27 H27B 109.5 . . ?
 C22 C27 H27C 109.5 . . ?
 C38 C39 H39 123.2 . . ?
 C38 C39 N1 113.6(2) . . ?
 N1 C39 H39 123.2 . . ?
 C17 C16 H16 119.6 . . ?
 C15 C16 H16 119.6 . . ?
 C15 C16 C17 120.7(3) . . ?
 C18 C17 H17 119.7 . . ?
 C16 C17 C18 120.5(3) . . ?
 C16 C17 H17 119.7 . . ?
 C6 C5 N5 116.5(2) . . ?
 C10 C5 C6 124.6(2) . . ?
 C10 C5 N5 118.8(2) . . ?
 H35A C35 H35B 109.5 . . ?
 H35A C35 H35C 109.5 . . ?
 H35B C35 H35C 109.5 . . ?
 C30 C35 H35A 109.5 . . ?
 C30 C35 H35B 109.5 . . ?
 C30 C35 H35C 109.5 . . ?
 C5 C6 C12 121.1(3) . . ?
 C7 C6 C5 116.5(3) . . ?
 C7 C6 C12 122.4(3) . . ?
 C6 C12 H12A 109.5 . . ?
 C6 C12 H12B 109.5 . . ?
 C6 C12 H12C 109.5 . . ?
 H12A C12 H12B 109.5 . . ?
 H12A C12 H12C 109.5 . . ?
 H12B C12 H12C 109.5 . . ?
 C6 C7 H7 119.6 . . ?
 C8 C7 C6 120.8(3) . . ?
 C8 C7 H7 119.6 . . ?
 C7 C8 H8 119.6 . . ?
 C7 C8 C9 120.8(3) . . ?
 C9 C8 H8 119.6 . . ?
 C30 C31 H31 119.5 . . ?
 C32 C31 H31 119.5 . . ?
 C32 C31 C30 121.0(3) . . ?
 C29 C34 C36 121.0(2) . . ?
 C33 C34 C29 116.8(2) . . ?
 C33 C34 C36 122.2(2) . . ?
 Cl3S C1S Cl1S 110.15(19) . . ?
 Cl3S C1S Cl2S 110.15(18) . . ?
 Cl3S C1S H1S 108.6 . . ?
 Cl1S C1S H1S 108.6 . . ?
 Cl2S C1S Cl1S 110.61(17) . . ?
 Cl2S C1S H1S 108.6 . . ?
 H11A C11 H11B 109.5 . . ?
 H11A C11 H11C 109.5 . . ?
 H11B C11 H11C 109.5 . . ?
 C10 C11 H11A 109.5 . . ?
 C10 C11 H11B 109.5 . . ?
 C10 C11 H11C 109.5 . . ?
 S1 C38 H38 124.3 . . ?
 C39 C38 S1 111.4(2) . . ?
 C39 C38 H38 124.3 . . ?
 C23 C22 C27 121.4(2) . . ?
 C23 C22 C21 118.2(2) . . ?
 C21 C22 C27 120.3(2) . . ?
 C4 N6 C29 175.2(3) . . ?
 N5 C3 Pd1 170.7(2) . . ?
 C15 C14 C20 121.7(3) . . ?
 C13 C14 C20 120.7(3) . . ?
 C13 C14 C15 117.6(3) . . ?
 C8 C9 H9 119.4 . . ?
 C8 C9 C10 121.1(3) . . ?
 C10 C9 H9 119.4 . . ?
 C39 N1 Pd1 133.92(18) . . ?
 C37 N1 Pd1 114.41(16) . . ?
 C37 N1 C39 111.5(2) . . ?
 C22 C23 H23 119.4 . . ?
 C24 C23 C22 121.2(3) . . ?
 C24 C23 H23 119.4 . . ?
 C16 C15 C14 120.9(3) . . ?
 C16 C15 H15 119.6 . . ?
 C14 C15 H15 119.6 . . ?
 N2 C1 Pd1 111.71(16) . . ?
 N3 C1 Pd1 135.11(18) . . ?
 N3 C1 N2 113.1(2) . . ?
 C26 C28 H28A 109.5 . . ?
 C26 C28 H28B 109.5 . . ?
 C26 C28 H28C 109.5 . . ?
 H28A C28 H28B 109.5 . . ?
 H28A C28 H28C 109.5 . . ?
 H28B C28 H28C 109.5 . . ?
 C31 C30 C35 122.4(2) . . ?
 C31 C30 C29 116.3(3) . . ?
 C29 C30 C35 121.3(2) . . ?
 C23 C24 H24 120.1 . . ?
 C25 C24 C23 119.7(3) . . ?
 C25 C24 H24 120.1 . . ?
 C26 C25 H25 119.3 . . ?
 C24 C25 C26 121.3(3) . . ?
 C24 C25 H25 119.3 . . ?
 C1 N2 C2 120.2(2) . . ?
 C37 N2 C1 116.2(2) . . ?
 C37 N2 C2 123.4(2) . . ?
 C34 C29 N6 117.3(2) . . ?
 C34 C29 C30 124.1(2) . . ?
 C30 C29 N6 118.6(2) . . ?
 C1 N3 Pd2 116.29(16) . . ?
 C1 N3 C13 122.2(2) . . ?
 C13 N3 Pd2 121.49(16) . . ?
 C2 N4 C21 124.4(2) . . ?
 N2 C2 Pd2 108.90(16) . . ?
 N4 C2 Pd2 136.7(2) . . ?
 N4 C2 N2 114.2(2) . . ?
 N1 C37 S1 114.79(18) . . ?
 N1 C37 N2 117.3(2) . . ?
 N2 C37 S1 127.93(19) . . ?
 N6 C4 Pd2 171.9(2) . . ?
 C3 N5 C5 172.6(3) . . ?
 C5 C10 C11 121.3(2) . . ?
 C5 C10 C9 116.0(3) . . ?
 C9 C10 C11 122.7(3) . . ?
 C26 C21 C22 121.2(2) . . ?
 C26 C21 N4 119.8(2) . . ?
 C22 C21 N4 118.8(2) . . ?
 C34 C33 H33 119.5 . . ?
 C34 C33 C32 121.0(3) . . ?
 C32 C33 H33 119.5 . . ?
 C31 C32 C33 120.7(3) . . ?
 C31 C32 H32 119.6 . . ?
 C33 C32 H32 119.6 . . ?
 C18 C13 N3 119.3(2) . . ?
 C14 C13 C18 122.5(2) . . ?
 C14 C13 N3 118.1(2) . . ?
 C34 C36 H36A 109.5 . . ?
 C34 C36 H36B 109.5 . . ?
 C34 C36 H36C 109.5 . . ?
 H36A C36 H36B 109.5 . . ?
 H36A C36 H36C 109.5 . . ?
 H36B C36 H36C 109.5 . . ?

loop_
  _geom_torsion_atom_site_label_1
  _geom_torsion_atom_site_label_2
  _geom_torsion_atom_site_label_3
  _geom_torsion_atom_site_label_4
  _geom_torsion
  _geom_torsion_site_symmetry_1
  _geom_torsion_site_symmetry_2
  _geom_torsion_site_symmetry_3
  _geom_torsion_site_symmetry_4
  _geom_torsion_publ_flag
 Pd2 N3 C13 C18 -92.9(2) . . . . ?
 Pd2 N3 C13 C14 83.0(3) . . . . ?
 Pd1 N1 C37 S1 -175.22(11) . . . . ?
 Pd1 N1 C37 N2 4.4(3) . . . . ?
 Pd1 C1 N2 C2 174.65(16) . . . . ?
 Pd1 C1 N2 C37 0.2(3) . . . . ?
 Pd1 C1 N3 Pd2 -177.42(15) . . . . ?
 Pd1 C1 N3 C13 5.3(4) . . . . ?
 C19 C18 C17 C16 -178.2(3) . . . . ?
 C19 C18 C13 C14 177.8(2) . . . . ?
 C19 C18 C13 N3 -6.4(4) . . . . ?
 C20 C14 C15 C16 179.1(3) . . . . ?
 C20 C14 C13 C18 -178.8(3) . . . . ?
 C20 C14 C13 N3 5.4(4) . . . . ?
 C27 C22 C23 C24 -179.0(3) . . . . ?
 C27 C22 C21 C26 -178.8(2) . . . . ?
 C27 C22 C21 N4 -3.2(4) . . . . ?
 C39 N1 C37 S1 0.8(3) . . . . ?
 C39 N1 C37 N2 -179.6(2) . . . . ?
 C17 C18 C13 C14 -0.6(4) . . . . ?
 C17 C18 C13 N3 175.1(2) . . . . ?
 C17 C16 C15 C14 0.1(5) . . . . ?
 C5 C6 C7 C8 -1.4(4) . . . . ?
 C35 C30 C29 C34 179.0(2) . . . . ?
 C35 C30 C29 N6 -1.5(4) . . . . ?
 C6 C5 C10 C11 177.7(3) . . . . ?
 C6 C5 C10 C9 -1.7(4) . . . . ?
 C6 C7 C8 C9 -0.5(5) . . . . ?
 C12 C6 C7 C8 178.2(3) . . . . ?
 C7 C8 C9 C10 1.5(5) . . . . ?
 C8 C9 C10 C5 -0.4(4) . . . . ?
 C8 C9 C10 C11 -179.8(3) . . . . ?
 C31 C30 C29 C34 -0.3(4) . . . . ?
 C31 C30 C29 N6 179.2(2) . . . . ?
 C34 C33 C32 C31 0.9(4) . . . . ?
 C38 S1 C37 N1 -1.0(2) . . . . ?
 C38 S1 C37 N2 179.4(2) . . . . ?
 C38 C39 N1 Pd1 174.9(2) . . . . ?
 C38 C39 N1 C37 0.0(3) . . . . ?
 C22 C23 C24 C25 -1.6(4) . . . . ?
 N1 C39 C38 S1 -0.7(3) . . . . ?
 C23 C22 C21 C26 3.1(4) . . . . ?
 C23 C22 C21 N4 178.7(2) . . . . ?
 C23 C24 C25 C26 1.9(4) . . . . ?
 C15 C16 C17 C18 0.0(5) . . . . ?
 C15 C14 C13 C18 0.7(4) . . . . ?
 C15 C14 C13 N3 -175.1(2) . . . . ?
 C1 N2 C2 Pd2 4.9(3) . . . . ?
 C1 N2 C2 N4 -171.1(2) . . . . ?
 C1 N2 C37 S1 176.49(18) . . . . ?
 C1 N2 C37 N1 -3.1(3) . . . . ?
 C1 N3 C13 C18 84.2(3) . . . . ?
 C1 N3 C13 C14 -99.9(3) . . . . ?
 C28 C26 C25 C24 179.9(3) . . . . ?
 C28 C26 C21 C22 177.6(2) . . . . ?
 C28 C26 C21 N4 2.1(4) . . . . ?
 C30 C31 C32 C33 -0.8(4) . . . . ?
 C25 C26 C21 C22 -2.8(4) . . . . ?
 C25 C26 C21 N4 -178.3(2) . . . . ?
 N2 C1 N3 Pd2 -0.7(3) . . . . ?
 N2 C1 N3 C13 -178.0(2) . . . . ?
 C29 C34 C33 C32 -0.6(4) . . . . ?
 N3 C1 N2 C2 -2.8(3) . . . . ?
 N3 C1 N2 C37 -177.3(2) . . . . ?
 C2 N2 C37 S1 2.2(3) . . . . ?
 C2 N2 C37 N1 -177.3(2) . . . . ?
 C2 N4 C21 C26 -77.1(3) . . . . ?
 C2 N4 C21 C22 107.2(3) . . . . ?
 C37 S1 C38 C39 0.9(2) . . . . ?
 C37 N2 C2 Pd2 178.88(18) . . . . ?
 C37 N2 C2 N4 2.9(3) . . . . ?
 N5 C5 C6 C12 4.4(4) . . . . ?
 N5 C5 C6 C7 -176.0(2) . . . . ?
 N5 C5 C10 C11 -3.8(4) . . . . ?
 N5 C5 C10 C9 176.9(2) . . . . ?
 C10 C5 C6 C12 -177.0(3) . . . . ?
 C10 C5 C6 C7 2.6(4) . . . . ?
 C21 C26 C25 C24 0.3(4) . . . . ?
 C21 C22 C23 C24 -0.9(4) . . . . ?
 C21 N4 C2 Pd2 1.7(4) . . . . ?
 C21 N4 C2 N2 176.1(2) . . . . ?
 C33 C34 C29 N6 -179.2(2) . . . . ?
 C33 C34 C29 C30 0.4(4) . . . . ?
 C32 C31 C30 C35 -178.8(3) . . . . ?
 C32 C31 C30 C29 0.5(4) . . . . ?
 C13 C18 C17 C16 0.3(4) . . . . ?
 C13 C14 C15 C16 -0.4(4) . . . . ?
 C36 C34 C29 N6 0.9(4) . . . . ?
 C36 C34 C29 C30 -179.6(2) . . . . ?
 C36 C34 C33 C32 179.3(3) . . . . ?

_shelx_res_file
;
TITL CF solution in P21/c
    asm226.res
    created by SHELXL-2018/3 at 17:37:12 on 16-May-2023
CELL 0.71073 8.152856 18.932983 28.024807 90 95.6183 90
ZERR 4 0.00019 0.000394 0.000718 0 0.0024 0
LATT 1
SYMM -X,0.5+Y,0.5-Z
SFAC C H Br Cl N Pd S
UNIT 160 156 8 12 24 8 4

L.S. 14
PLAN  11
TEMP -173(2)
CONF
BOND $H
HTAB
MORE -1
fmap 2
acta
OMIT -4 55
REM <olex2.extras>
REM <HklSrc "%.\\asm226.hkl">
REM </olex2.extras>

WGHT    0.020900    6.660000
FVAR       1.03235
PD2   6    0.364557    0.601122    0.810281    11.00000    0.01229    0.01177 =
         0.00777    0.00060   -0.00015   -0.00160
PD1   6    0.360226    0.663760    0.641333    11.00000    0.01293    0.01104 =
         0.00775   -0.00018    0.00028   -0.00198
BR2   3    0.157518    0.513529    0.834025    11.00000    0.02178    0.01943 =
         0.01731    0.00582   -0.00233   -0.00632
BR1   3    0.349762    0.704715    0.557319    11.00000    0.02807    0.02166 =
         0.01024    0.00175   -0.00004   -0.00699
S1    7    0.699765    0.798073    0.735821    11.00000    0.01778    0.01483 =
         0.01382   -0.00105   -0.00042   -0.00649
CL3S  4    0.885335    0.349937    0.872153    11.00000    0.04123    0.06767 =
         0.03066    0.01022    0.00966    0.01158
CL1S  4    0.782396    0.331415    0.771494    11.00000    0.06228    0.05445 =
         0.03549   -0.01306    0.01578   -0.03424
CL2S  4    0.650326    0.445879    0.824426    11.00000    0.04086    0.08652 =
         0.03222    0.00046   -0.00199    0.02163
C18   1    0.241448    0.481463    0.700784    11.00000    0.03131    0.01435 =
         0.00998    0.00288   -0.00198   -0.00351
C19   1    0.422224    0.467450    0.699917    11.00000    0.03691    0.02246 =
         0.02184   -0.00142    0.00015    0.00971
AFIX 137
H19A  2    0.439260    0.417482    0.692724    11.00000   -1.50000
H19B  2    0.480043    0.478943    0.731268    11.00000   -1.50000
H19C  2    0.465470    0.496770    0.675193    11.00000   -1.50000
AFIX   0
C26   1    0.495047    0.767611    0.886262    11.00000    0.01983    0.01241 =
         0.01806   -0.00016    0.00346   -0.00241
C20   1   -0.039701    0.631036    0.733255    11.00000    0.02106    0.05264 =
         0.02167   -0.00170    0.00003    0.01327
AFIX 137
H20A  2   -0.004947    0.668231    0.712105    11.00000   -1.50000
H20B  2    0.009146    0.639655    0.766093    11.00000   -1.50000
H20C  2   -0.160125    0.631207    0.732521    11.00000   -1.50000
AFIX   0
C27   1    0.904174    0.687838    0.857536    11.00000    0.01589    0.04003 =
         0.02064   -0.00127    0.00360   -0.00038
AFIX 137
H27A  2    1.005541    0.681679    0.878977    11.00000   -1.50000
H27B  2    0.925571    0.719474    0.831171    11.00000   -1.50000
H27C  2    0.867111    0.641865    0.844519    11.00000   -1.50000
AFIX   0
C39   1    0.620938    0.786439    0.645825    11.00000    0.02048    0.01815 =
         0.01554    0.00416    0.00064   -0.00649
AFIX  43
H39   2    0.613683    0.794188    0.612193    11.00000   -1.20000
AFIX   0
C16   1   -0.041417    0.444622    0.683928    11.00000    0.05229    0.04187 =
         0.01970    0.00911   -0.01114   -0.03781
AFIX  43
H16   2   -0.119460    0.409710    0.672633    11.00000   -1.20000
AFIX   0
C17   1    0.124393    0.430718    0.684257    11.00000    0.05593    0.01760 =
         0.01436    0.00359   -0.00642   -0.01207
AFIX  43
H17   2    0.159729    0.386346    0.673186    11.00000   -1.20000
AFIX   0
C5    1   -0.047575    0.526471    0.576244    11.00000    0.01734    0.01865 =
         0.00962    0.00117   -0.00207   -0.00585
C35   1    0.812710    0.540929    0.948839    11.00000    0.01935    0.02449 =
         0.02665   -0.00212    0.00076    0.00410
AFIX 137
H35A  2    0.919698    0.530486    0.966501    11.00000   -1.50000
H35B  2    0.825612    0.579013    0.925820    11.00000   -1.50000
H35C  2    0.770816    0.498553    0.931642    11.00000   -1.50000
AFIX   0
C6    1   -0.199854    0.559817    0.577254    11.00000    0.01980    0.02960 =
         0.01531    0.00218   -0.00193    0.00094
C12   1   -0.211850    0.633020    0.596965    11.00000    0.03033    0.04116 =
         0.02586   -0.01012   -0.00391    0.01559
AFIX 137
H12A  2   -0.188189    0.631813    0.631921    11.00000   -1.50000
H12B  2   -0.323346    0.651410    0.588646    11.00000   -1.50000
H12C  2   -0.131858    0.663703    0.583219    11.00000   -1.50000
AFIX   0
C7    1   -0.337310    0.521862    0.558928    11.00000    0.01920    0.04987 =
         0.02446    0.00881   -0.00343   -0.00540
AFIX  43
H7    2   -0.443890    0.541940    0.559495    11.00000   -1.20000
AFIX   0
C8    1   -0.321228    0.455377    0.539903    11.00000    0.03308    0.04032 =
         0.03211    0.01096   -0.01477   -0.02170
AFIX  43
H8    2   -0.416932    0.430043    0.527772    11.00000   -1.20000
AFIX   0
C31   1    0.730676    0.559690    1.032928    11.00000    0.02425    0.01654 =
         0.02456   -0.00220   -0.00995    0.00410
AFIX  43
H31   2    0.835991    0.543138    1.045644    11.00000   -1.20000
AFIX   0
C34   1    0.418722    0.609699    0.997454    11.00000    0.02039    0.01321 =
         0.01289    0.00099   -0.00071   -0.00180

C1S   1    0.824091    0.393469    0.818157    11.00000    0.02531    0.03801 =
         0.02612   -0.00192    0.00211   -0.00779
AFIX  13
H1S   2    0.916124    0.424771    0.810003    11.00000   -1.20000
AFIX   0

C11   1    0.143735    0.429160    0.555444    11.00000    0.04227    0.02086 =
         0.02387   -0.00361    0.00083    0.00854
AFIX 137
H11A  2    0.209939    0.460122    0.536887    11.00000   -1.50000
H11B  2    0.134770    0.382422    0.540386    11.00000   -1.50000
H11C  2    0.196816    0.424701    0.588222    11.00000   -1.50000
AFIX   0
C38   1    0.716978    0.825286    0.677555    11.00000    0.02363    0.02112 =
         0.01701    0.00542    0.00187   -0.00814
AFIX  43
H38   2    0.785578    0.862898    0.669069    11.00000   -1.20000
AFIX   0
C22   1    0.772603    0.719303    0.885082    11.00000    0.01794    0.01623 =
         0.01608   -0.00195    0.00136   -0.00546
N6    5    0.493578    0.594550    0.917632    11.00000    0.01593    0.01560 =
         0.01217   -0.00020    0.00064   -0.00196
C3    1    0.191465    0.597137    0.617387    11.00000    0.01752    0.01446 =
         0.00994    0.00221    0.00243    0.00264
C14   1    0.016529    0.560814    0.716525    11.00000    0.01708    0.03547 =
         0.01028    0.00321    0.00070   -0.00367
C9    1   -0.168052    0.425178    0.538254    11.00000    0.05259    0.01840 =
         0.02511    0.00231   -0.01071   -0.01358
AFIX  43
H9    2   -0.159637    0.379759    0.524292    11.00000   -1.20000
AFIX   0
N1    5    0.533867    0.734226    0.666750    11.00000    0.01573    0.01288 =
         0.01215   -0.00015    0.00237   -0.00280
C23   1    0.797936    0.729700    0.934384    11.00000    0.02231    0.02254 =
         0.01707    0.00010   -0.00394   -0.00563
AFIX  43
H23   2    0.901139    0.717396    0.951007    11.00000   -1.20000
AFIX   0
C15   1   -0.095395    0.508540    0.699779    11.00000    0.02267    0.05950 =
         0.01613    0.00805   -0.00375   -0.01990
AFIX  43
H15   2   -0.210313    0.517201    0.699320    11.00000   -1.20000
AFIX   0
C1    1    0.373917    0.640271    0.711705    11.00000    0.00998    0.01097 =
         0.01111   -0.00217   -0.00042   -0.00060
C28   1    0.331984    0.789082    0.860268    11.00000    0.02321    0.02784 =
         0.02099   -0.00008    0.00555    0.00683
AFIX 137
H28A  2    0.272432    0.746882    0.847952    11.00000   -1.50000
H28B  2    0.351173    0.820334    0.833499    11.00000   -1.50000
H28C  2    0.266368    0.813983    0.882461    11.00000   -1.50000
AFIX   0
C30   1    0.693296    0.563490    0.983369    11.00000    0.02042    0.01258 =
         0.01703   -0.00065   -0.00332   -0.00111
C24   1    0.675542    0.757648    0.959685    11.00000    0.03518    0.01841 =
         0.01149   -0.00334    0.00154   -0.00697
AFIX  43
H24   2    0.693904    0.763279    0.993470    11.00000   -1.20000
AFIX   0
C25   1    0.527055    0.777251    0.935662    11.00000    0.03089    0.01438 =
         0.01468   -0.00351    0.00944   -0.00203
AFIX  43
H25   2    0.444783    0.797743    0.953069    11.00000   -1.20000
AFIX   0
N2    5    0.486580    0.684261    0.738885    11.00000    0.01468    0.01323 =
         0.00708   -0.00067    0.00053   -0.00321
C29   1    0.536491    0.588884    0.967218    11.00000    0.01976    0.01372 =
         0.00936    0.00010   -0.00308   -0.00145
N3    5    0.299819    0.596756    0.737522    11.00000    0.01377    0.01188 =
         0.01144   -0.00022    0.00066   -0.00157
N4    5    0.591729    0.728059    0.810960    11.00000    0.01612    0.01665 =
         0.01052   -0.00209    0.00309   -0.00320
C2    1    0.503515    0.679885    0.790364    11.00000    0.01287    0.01420 =
         0.01013   -0.00077    0.00163    0.00045
C37   1    0.565148    0.734293    0.713667    11.00000    0.01308    0.01101 =
         0.01383   -0.00103    0.00094   -0.00043
C4    1    0.449474    0.602125    0.877903    11.00000    0.01473    0.01420 =
         0.01440    0.00054    0.00198   -0.00101
N5    5    0.090575    0.562986    0.597616    11.00000    0.01544    0.01432 =
         0.01269    0.00049   -0.00138   -0.00116
C10   1   -0.025253    0.460153    0.556726    11.00000    0.03268    0.01664 =
         0.01153    0.00250   -0.00145   -0.00380
C21   1    0.618111    0.737025    0.861488    11.00000    0.01864    0.01310 =
         0.01007   -0.00103    0.00181   -0.00586
C33   1    0.463272    0.604747    1.046291    11.00000    0.03082    0.01698 =
         0.01420   -0.00317    0.00366    0.00131
AFIX  43
H33   2    0.387281    0.618798    1.068105    11.00000   -1.20000
AFIX   0
C32   1    0.617060    0.579600    1.063815    11.00000    0.03977    0.01459 =
         0.01335   -0.00123   -0.00795    0.00092
AFIX  43
H32   2    0.644648    0.576015    1.097456    11.00000   -1.20000
AFIX   0
C13   1    0.183915    0.545685    0.716860    11.00000    0.01723    0.01545 =
         0.00810    0.00209   -0.00111   -0.00652
C36   1    0.251917    0.636023    0.977293    11.00000    0.01846    0.02527 =
         0.02191    0.00018    0.00263    0.00211
AFIX 137
H36A  2    0.264655    0.680465    0.960112    11.00000   -1.50000
H36B  2    0.182870    0.643944    1.003515    11.00000   -1.50000
H36C  2    0.199647    0.600796    0.955130    11.00000   -1.50000
AFIX   0
HKLF 4


REM  CF solution in P21/c
REM wR2 = 0.0600, GooF = S = 1.072, Restrained GooF = 1.072 for all data
REM R1 = 0.0264 for 8712 Fo > 4sig(Fo) and 0.0334 for all 9898 data
REM 495 parameters refined using 0 restraints

END

WGHT      0.0209      6.6607

REM Instructions for potential hydrogen bonds
HTAB C39 Br1
EQIV $1 x+1, y, z
HTAB C1S Br2_$1
EQIV $2 -x+1, y+1/2, -z+3/2
HTAB C38 Br2_$2

REM Highest difference peak  0.710,  deepest hole -0.860,  1-sigma level  0.089
Q1    1   0.2263  0.4795  0.8253  11.00000  0.05    0.71
Q2    1   0.6913  0.4807  0.8126  11.00000  0.05    0.68
Q3    1   0.4513  0.6780  0.5583  11.00000  0.05    0.51
Q4    1   0.4503  0.6434  0.6389  11.00000  0.05    0.47
Q5    1   0.1522  0.5077  0.7975  11.00000  0.05    0.45
Q6    1   0.3606  0.6981  0.5895  11.00000  0.05    0.44
Q7    1   0.2540  0.7131  0.5695  11.00000  0.05    0.44
Q8    1   0.5283  0.7426  0.6887  11.00000  0.05    0.44
Q9    1   0.8115  0.3217  0.7970  11.00000  0.05    0.44
Q10   1   0.6390  0.6233  0.8385  11.00000  0.05    0.43
Q11   1   0.3753  0.6661  0.6735  11.00000  0.05    0.43
;
_shelx_res_checksum                75415
_shelx_hkl_file
;
   0   0  -4 16354.3 362.281   7
   0   0  -4 15996.7 359.173   1
   0   0  -5 109.504 50.1796   1
   0   0  -5 116.237 45.9982   7
   0   0   5 88.9596 50.1566   7
   0   0   5 102.412 45.3340   1
   0   0  -6 33700.5 710.963   7
   0   0   6 34167.1 713.082   1
   0   0  -6 35462.2 713.684   1
   0   0   6 33968.0 710.674   7
   0   0   7 166.212 75.8631   7
   0   0  -7-31.8413 42.1691   7
   0   0  -7 45.9036 69.0507   1
   0   0   7 56.0920 51.2750   1
   0   0  -8 111191. 2032.64   7
   0   0   8 111073. 2030.24   7
   0   0  -8 111707. 2029.81   1
   0   0   8 110701. 2035.90   1
   0   0   9 599.437 121.674   7
   0   0  -9 406.648 113.633   1
   0   0 -10 57678.4 1190.75   1
   0   0  10 57035.8 1188.61   7
   0   0 -11 325.390 103.957   1
   0   0  11 340.387 105.994   7
   0   0  12 12665.3 435.147   7
   0   0 -12 12798.4 438.190   1
   0   0 -13 83.2949 89.3044   1
   0   0  13 37.8156 87.8206   7
   0   0  14 250.812 107.335   7
   0   0 -14 315.265 106.843   1
   0   0  15 413.257 139.530   7
   0   0 -15 467.650 143.528   1
   0   0 -16 41439.3 1043.22   1
   0   0  16 42003.5 1053.51   7
   0   0  17 781.431 139.259   2
   0   0  17 675.658 179.837   7
   0   0 -17 388.053 129.078   1
   0   0  18 289.760 33.5044   3
   0   0 -18 469.303 122.859   1
   0   0  18 266.505 126.176   7
   0   0  18 175.712 94.9468   2
   0   0  19-49.4623 125.742   7
   0   0  19 24.4970 96.1934   2
   0   0 -19-73.0435 106.200   1
   0   0  20 458.878 148.639   7
   0   0  20 230.903 107.102   2
   0   0 -20 159.771 118.097   1
   0   0 -21 367.346 163.579   1
   0   0  21 530.667 176.391   7
   0   0  21 207.079 113.051   2
   0   0 -22 19729.0 734.977   1
   0   0  22 20031.5 692.816   2
   0   0  22 20334.3 751.974   7
   0   0  23 1207.31 193.257   2
   0   0  23 1441.99 251.128   7
   0   0  23 1105.26 227.854  12
   0   0 -23 1133.96 210.549   1
   0   0  24 27173.9 849.656   2
   0   0  24 25324.7 889.879   7
   0   0 -24 23531.6 856.572   1
   0   0  24 25304.0 956.924  12
   0   0  25 153.134 190.707  12
   0   0 -25 744.828 205.810   1
   0   0  25 560.540 172.288   7
   0   0  25 775.912 170.007   2
   0   0  26 2036.20 284.562   7
   0   0  26 2126.17 245.157   2
   0   0 -26 2294.52 280.453   1
   0   0  26 1825.19 290.694  12
   0   0 -27 322.168 163.353   1
   0   0  27-37.9864 112.205   2
   0   0  27 103.207 178.711  12
   0   0  27-68.0815 161.584   7
   0   0  28 1125.09 250.760  12
   0   0 -28 1456.15 248.234   1
   0   0  28 1206.64 239.159   7
   0   0  28 1616.97 226.225   2
   0   0  29 318.276 211.370  12
   0   0  29-94.3348 168.016   7
   0   0  29-36.9337 137.625   2
   0   0 -29 245.107 169.416   1
   0   0  30 1085.14 247.473   7
   0   0  30 1630.86 318.009  12
   0   0  30 1656.15 231.820   2
   0   0 -30 2196.01 292.742   1
   0   0 -31 21.3548 160.128   1
   0   0  31 286.295 213.197  12
   0   0  31 84.7337 163.531   7
   0   0  32 700.324 237.115   7
   0   0 -32 949.605 235.047   1
   0   0  32 511.480 247.070  12
   0   0  33-159.814 189.376  12
   0   0 -33-142.769 188.878   1
   0   0  33 5.91057 178.867   7
   0   0  34 1276.45 317.729  12
   0   0  34 1163.24 270.799   7
   0   0 -34 1260.79 252.957   1
   0   0 -35 423.427 173.911   1
   0   0  35 322.611 250.330  12
   0   0  35 697.470 268.888   7
   0   0  36 15599.9 914.499  12
   0   0  36 14409.3 813.637   7
   0   0 -36 15536.3 825.865   1
   0   0  37 407.395 242.481   7
   0   0 -37 436.099 191.436   1
   0   0  37 355.615 280.113  12
   0   0 -38-145.089 169.542   1
   0   0  38 183.105 227.078   7
   0   1  -4 375.640 50.3094   7
   0  -1  -4 335.411 45.9457   7
   0  -1   4 359.622 48.3626  10
   0  -1   4 342.616 48.8279   2
   0   1   4 269.587 40.9727   7
   0   1  -4 481.907 52.3506   1
   0  -1   5 58867.5 1073.83   2
   0   1  -5 56970.7 1074.58   7
   0  -1  -5 55741.0 1067.35   7
   0  -1   5 57269.0 1077.52  10
   0   1  -5 57400.9 1077.96  10
   0   1  -5 58539.2 1063.90   1
   0  -1   5 57730.1 1064.93   1
   0  -1   5 56653.9 1070.04   7
   0   1   5 56667.5 1065.61   7
   0  -1   6 3100.20 143.115   1
   0   1  -6 3117.12 148.430   7
   0  -1  -6 3248.10 155.611   1
   0  -1   6 2987.38 150.314   2
   0  -1   6 3083.49 153.987  10
   0  -1  -6 3015.58 145.397   7
   0   1  -6 2912.43 148.872  10
   0   1  -6 2961.84 140.897   1
   0   1   6 3088.70 147.099   7
   0  -1   6 2953.04 146.794   7
   0  -1   7 28227.9 613.136   1
   0  -1   7 27554.9 614.276   7
   0  -1  -7 26643.0 605.945   7
   0   1  -7 27124.4 602.409   1
   0  -1  -7 26492.7 613.631   1
   0   1  -7 26708.2 610.935   7
   0  -1   7 25113.4 598.400   2
   0  -1   7 27220.5 616.669  10
   0   1   7 26346.2 602.390   7
   0  -1   8 2000.21 130.933   1
   0  -1   8 1874.59 138.332  10
   0  -1   8 2309.56 144.679   2
   0  -1   8 2016.20 141.468   7
   0   1  -8 2029.14 138.118   7
   0  -1  -8 1795.43 142.645   1
   0   1  -8 2071.53 136.330   1
   0   1   8 2019.25 141.999   7
   0  -1  -8 2008.61 134.673   7
   0  -1  -9 19764.2 533.858   1
   0  -1   9 18961.6 526.890   7
   0   1   9 19942.3 525.302   7
   0  -1   9 21691.3 529.363   2
   0   1  -9 20124.0 525.361   1
   0  -1  10 21150.0 578.318   7
   0  -1 -10 22431.4 589.417   1
   0  -1  10 20307.3 557.243   2
   0   1  10 21638.0 575.863   7
   0   1 -10 22338.0 570.583   1
   0   1  11 58518.1 1223.63   7
   0  -1 -11 57503.6 1229.69   1
   0   1 -11 59182.0 1212.69   1
   0  -1  11 57611.7 1228.29   7
   0  -1  11 55509.1 1197.23   2
   0   1 -12 159294. 2894.95   1
   0  -1  12 151752. 2902.37   7
   0  -1  12 167381. 2895.84   2
   0   1  12 155544. 2898.61   7
   0  -1 -12 155799. 2911.10   1
   0  -1  13 7797.56 346.307   2
   0  -1  13 7358.39 365.944   7
   0  -1 -13 7538.20 339.103   1
   0   1 -13 8889.87 367.544   1
   0   1  13 8611.25 373.767   7
   0   1 -14 8617.87 370.693   1
   0  -1  14 8289.32 380.154   7
   0  -1  14 8725.80 361.794   2
   0   1  14 8834.76 381.288   7
   0  -1 -14 8570.14 381.101   1
   0  -1  15 17900.5 587.649   7
   0  -1  15 16067.3 541.197   2
   0  -1 -15 16916.1 578.982   1
   0   1  15 17455.8 579.552   7
   0   1 -15 17084.7 567.678   1
   0  -1  16 4048.66 280.942   7
   0   1 -16 4627.70 292.520   1
   0  -1 -16 3813.86 275.970   1
   0  -1  16 4167.53 266.795   2
   0   1  16 4264.99 289.026   7
   0   1 -17 17230.4 594.778   1
   0   1  17 17557.7 610.795   7
   0  -1 -17 16674.4 599.648   1
   0  -1  17 16833.9 576.121   2
   0  -1  17 17421.3 616.629   7
   0  -1  18 696.216 160.901   7
   0  -1 -18 699.119 147.137   1
   0  -1  18 821.902 146.322   2
   0   1 -18 823.234 163.970   1
   0   1  18 912.357 177.439   7
   0  -1  19 7593.07 376.171   2
   0   1  19 7167.81 396.411   7
   0  -1 -19 6817.33 387.060   1
   0  -1  19 6922.74 392.158   7
   0   1 -19 7247.42 387.659   1
   0   1  20 378.166 158.293   7
   0  -1  20 169.034 109.504   2
   0  -1  20 170.599 157.136  12
   0  -1 -20 141.289 107.141   1
   0   1 -20 229.496 124.163   1
   0  -1  20 306.988 141.825   7
   0   1  21 4868.58 300.359   2
   0  -1 -21 4696.17 332.151   1
   0  -1  21 4393.27 308.091   2
   0  -1  21 4830.32 347.075   7
   0   1  21 4351.48 331.768   7
   0  -1  21 4785.02 368.578  12
   0   1 -21 4698.22 334.643   1
   0   1 -22 5334.75 364.043   1
   0   1  22 5833.94 347.711   2
   0  -1  22 5496.30 380.897   7
   0  -1  22 5348.04 349.386   2
   0  -1 -22 5292.69 363.445   1
   0   1  22 5416.55 372.382   7
   0  -1  22 5142.70 405.471  12
   0   1 -23 1397.31 222.849   1
   0  -1  23 1072.80 195.120   2
   0   1  23 1060.00 182.995   2
   0  -1 -23 897.538 182.680   1
   0   1  23 1219.59 220.976   7
   0  -1  23 1244.14 240.125  12
   0  -1  23 1160.55 223.578   7
   0   1  24 15697.9 604.181   2
   0   1 -24 15008.8 652.458   1
   0  -1 -24 14686.2 648.320   1
   0  -1  24 14668.6 703.970  12
   0  -1  24 14415.8 658.676   7
   0  -1  24 14801.6 614.355   2
   0   1  24 14270.0 648.394   7
   0   1  25 7029.87 408.365   2
   0   1 -25 7177.90 453.648   1
   0  -1  25 7355.88 430.761   2
   0  -1 -25 6766.57 440.549   1
   0  -1  25 6825.84 498.570  12
   0   1  25 7455.27 468.976   7
   0  -1  25 7413.91 473.658   7
   0   1  26 62.6952 185.922  12
   0   1  26 336.790 193.859   7
   0  -1  26 236.197 179.233   7
   0  -1  26 8.36102 118.900   2
   0   1 -26 241.143 149.223   1
   0  -1  26 270.717 188.216  12
   0  -1 -26 308.161 154.340   1
   0   1  26-21.3806 118.099   2
   0  -1 -27 754.118 193.444   1
   0   1  27 427.723 142.210   2
   0   1 -27 942.835 216.888   1
   0  -1  27 462.974 195.080  12
   0  -1  27 615.983 228.810   7
   0  -1  27 630.107 185.654   2
   0   1  27 641.046 232.395  12
   0   1  27 447.872 180.928   7
   0   1 -28 16420.3 739.555   1
   0  -1  28 16865.5 764.983   7
   0  -1  28 17123.5 716.421   2
   0  -1  28 17738.8 838.777  12
   0   1  28 17375.1 691.224   2
   0   1  28 16091.1 812.801  12
   0  -1 -28 16435.3 744.685   1
   0   1  28 16318.6 748.561   7
   0   1  29 5027.97 433.220   7
   0   1 -29 5015.29 415.433   1
   0  -1  29 4819.15 423.095   7
   0  -1  29 5282.19 478.745  12
   0   1  29 5216.15 380.882   2
   0   1  29 4746.88 447.020  12
   0  -1  29 5720.42 409.231   2
   0  -1 -29 4342.05 392.129   1
   0   1 -30 3477.37 352.534   1
   0  -1  30 3292.06 354.808   7
   0   1  30 3329.30 402.164  12
   0   1  30 3754.59 385.063   7
   0  -1 -30 3532.88 361.342   1
   0  -1  30 3548.93 336.509   2
   0   1  30 4066.04 337.947   2
   0  -1  30 3741.47 408.906  12
   0   1 -31 8931.97 569.674   1
   0  -1 -31 9690.11 598.178   1
   0  -1  31 9631.33 608.547   7
   0  -1  31 9273.35 539.135   2
   0  -1  31 9755.56 652.387  12
   0   1  31 8731.68 587.231   7
   0   1  31 8980.78 634.100  12
   0   1  32 6447.43 503.697   7
   0   1 -32 6572.39 497.400   1
   0   1  32 6663.76 562.511  12
   0  -1  32 6294.92 500.622   7
   0  -1  32 6567.20 560.116  12
   0  -1 -32 6280.62 499.062   1
   0  -1  33 1866.17 306.082   7
   0   1  33 2055.31 337.185   7
   0  -1 -33 2019.31 319.072   1
   0  -1  33 1511.08 320.057  12
   0   1 -33 1986.52 294.412   1
   0   1  33 1647.99 345.219  12
   0  -1 -34 4132.51 429.255   1
   0  -1  34 4540.52 459.959   7
   0   1 -34 4084.59 415.038   1
   0   1  34 5205.60 522.662  12
   0   1  34 4454.49 449.242   7
   0  -1  34 5437.92 535.275  12
   0   1  35 2508.29 365.904   7
   0  -1 -35 2557.36 358.767   1
   0  -1  35 2212.03 340.235   7
   0   1 -35 2430.31 340.889   1
   0   1  35 2604.01 404.971  12
   0  -1  35 2627.45 398.784  12
   0   1 -36 4918.38 477.645   1
   0  -1  36 5252.29 557.594  12
   0   1  36 4852.73 491.435   7
   0  -1  36 5109.27 499.461   7
   0   1  36 5028.90 525.674  12
   0  -1 -36 4267.85 451.852   1
   0  -1 -37 1231.95 270.103   1
   0   1  37 1567.26 293.957   7
   0  -1  37 1913.94 331.310   7
   0   1  37 2002.12 373.355  12
   0   1 -37 1152.02 275.101   1
   0  -1  37 1807.74 375.760  12
   0  -1  38 29.8389 214.344   7
   0   1 -38 2.90478 175.320   1
   0   1  38 87.1087 217.949   7
   0  -1 -38-303.309 239.713   1
   0  -2  -3 8247.91 197.948   8
   0  -2   3 8335.81 213.704  12
   0  -2  -3 8079.98 199.569   5
   0  -2   3 8331.91 236.577   2
   0  -2   3 8446.05 226.134  10
   0   2  -3 8615.96 224.718   7
   0  -2   4 7028.51 214.427  10
   0  -2   4 7223.12 229.528   2
   0   2  -4 8107.66 226.569  12
   0   2  -4 7146.40 232.802   2
   0  -2  -4 6749.01 188.237   5
   0   2   4 7404.25 189.953   5
   0  -2   4 6820.93 202.694   1
   0   2   4 7681.50 191.691   8
   0  -2   4 6771.03 208.538  12
   0   2  -4 7186.67 215.483   7
   0   2  -4 7136.15 204.578   1
   0  -2   4 7189.86 216.449   7
   0   2  -4 7070.82 216.536  10
   0   2   5 5641.80 167.734   5
   0   2  -5 4993.05 196.850   2
   0  -2   5 5445.91 192.548   7
   0   2   5 4888.93 132.464   9
   0   2  -5 5532.33 197.365  10
   0  -2   5 4893.87 180.855   1
   0  -2   5 5503.54 197.003  12
   0   2  -5 5308.85 181.118   1
   0  -2   5 5334.23 191.591  10
   0   2  -5 5376.67 190.108   7
   0  -2  -5 5056.42 182.941   7
   0  -2   5 5490.80 203.487   2
   0  -2   6 36944.6 768.438  10
   0  -2   6 36956.7 775.763   2
   0  -2   6 35470.0 756.818   7
   0  -2   6 37139.9 750.664   1
   0   2  -6 35945.0 765.726  10
   0   2  -6 36201.0 759.997   7
   0   2   6 36079.7 751.228   7
   0   2  -6 36527.4 748.003   1
   0  -2  -6 37632.0 757.905   7
   0   2   6 36230.6 713.375   5
   0  -2   6 38649.2 781.432  12
   0  -2   7 213.707 78.7288   2
   0  -2   7 244.623 68.2597  12
   0   2  -7 264.482 57.1256   7
   0   2  -7 195.769 53.9429   1
   0  -2   7 254.630 53.3727   1
   0   2  -7 224.516 74.7857  10
   0  -2  -7 296.260 68.6830   7
   0   2   7 161.434 63.5127   7
   0  -2   7 358.623 73.3498   7
   0  -2   7 281.112 67.3371  10
   0  -2   8 93771.6 1718.73   1
   0  -2   8 88956.0 1749.61  12
   0  -2  -8 95049.0 1731.17   7
   0   2  -8 93616.6 1745.55  10
   0  -2   8 87014.6 1729.72   2
   0  -2   8 94036.3 1738.66   7
   0   2   8 93317.7 1723.26   7
   0   2  -8 93078.1 1717.02   1
   0  -2   9 2211.70 180.162  12
   0   2   9 1605.97 136.817   7
   0  -2   9 1825.66 148.186   7
   0  -2   9 2023.29 171.203   2
   0   2  -9 1588.45 136.586  10
   0   2  -9 1613.82 132.922   1
   0   2  10 44595.6 970.080   7
   0  -2 -10 45787.1 991.443   1
   0  -2  10 44198.0 983.356   2
   0  -2  10 45667.0 990.829   7
   0  -2  10 40597.8 989.453  12
   0   2 -10 45668.8 969.234   1
   0  -2  11 1339.98 165.008  12
   0   2  11 1003.22 137.094   7
   0  -2 -11 991.217 133.260   1
   0  -2  11 828.811 118.229   7
   0  -2  11 1286.63 153.909   2
   0   2 -11 1250.77 144.683   1
   0  -2  12 19833.2 588.548   7
   0  -2  12 18345.4 567.962   2
   0   2 -12 20226.7 575.234   1
   0  -2  12 20058.6 616.684  12
   0   2  12 19951.3 578.434   7
   0  -2 -12 20900.9 605.045   1
   0   2  13 8852.74 370.714   7
   0   2 -13 9475.64 373.707   1
   0  -2  13 8177.80 389.851  12
   0  -2  13 8684.20 375.518   7
   0  -2 -13 9126.69 388.986   1
   0  -2  13 9253.83 382.123   2
   0  -2  14 36799.8 934.444   7
   0   2  14 37563.0 925.289   7
   0  -2 -14 36425.9 934.605   1
   0  -2  14 35661.0 912.307   2
   0   2 -14 36312.3 908.218   1
   0  -2  14 37465.1 973.867  12
   0   2  15 5414.31 309.900   7
   0  -2  15 5181.89 299.894   2
   0  -2 -15 4869.25 293.019   1
   0  -2  15 4739.53 302.840   7
   0   2 -15 5494.69 309.346   1
   0  -2  15 5035.21 326.550  12
   0   2  16 5727.02 325.771   7
   0   2 -16 5889.21 325.050   1
   0  -2 -16 5168.39 314.624   1
   0  -2  16 5481.03 330.262   7
   0  -2  16 5580.60 318.048   2
   0  -2  16 5053.29 333.831  12
   0  -2  17 21006.6 673.575   2
   0  -2  17 21023.1 692.680   7
   0  -2  17 20261.1 715.725  12
   0   2 -17 21286.7 669.863   1
   0  -2 -17 19800.6 675.608   1
   0   2  17 20277.5 668.075   7
   0  -2 -18 1099.88 191.152   1
   0  -2  18 303.573 157.963   7
   0   2 -18 888.479 170.944   1
   0  -2  18 783.521 194.405  12
   0  -2  18 958.217 175.638   2
   0   2  18 1135.57 200.942   7
   0   2  19 20627.6 702.033   7
   0  -2  19 20987.4 725.769   7
   0   2 -19 19768.1 683.994   1
   0  -2  19 19953.9 744.309  12
   0  -2 -19 20260.6 713.830   1
   0  -2  19 20575.6 688.930   2
   0   2  20 5580.66 365.136   7
   0  -2  20 5585.48 368.634   7
   0   2 -20 5537.70 356.848   1
   0  -2 -20 5619.91 378.822   1
   0  -2  20 5249.62 380.026  12
   0  -2  20 6080.58 360.524   2
   0   2 -21 6190.83 385.034   1
   0  -2 -21 6008.70 389.207   1
   0  -2  21 5746.00 365.806   2
   0   2  21 6671.19 403.904   7
   0  -2  21 6498.33 425.487  12
   0  -2  21 5707.09 377.759   7
   0   2  22 4725.53 356.644   7
   0  -2  22 4653.97 339.792   2
   0  -2  22 4520.37 346.837   7
   0  -2 -22 4643.63 359.504   1
   0  -2  22 4173.29 365.093  12
   0   2 -22 4932.40 354.165   1
   0   2 -23 16996.6 683.385   1
   0  -2  23 15989.5 692.435   7
   0   2  23 17578.5 627.817   2
   0   2  23 16138.6 674.590   7
   0  -2  23 17828.6 674.939   2
   0  -2 -23 16484.1 690.787   1
   0  -2  23 16905.1 742.306  12
   0  -2  24 19436.3 828.895  12
   0  -2  24 20446.5 801.667   7
   0   2  24 21225.7 797.162   7
   0   2 -24 19511.9 760.843   1
   0  -2  24 21683.1 774.995   2
   0  -2 -24 21050.7 804.022   1
   0   2  24 21187.0 713.242   2
   0  -2 -25 5238.52 398.499   1
   0   2 -25 4993.24 384.393   1
   0  -2  25 5003.08 398.310   7
   0  -2  25 4965.80 366.713   2
   0   2  25 5036.72 338.430   2
   0   2  25 5225.70 392.395   7
   0  -2  25 5040.93 425.083  12
   0   2  26 3004.43 313.113   7
   0   2 -26 2571.40 283.930   1
   0  -2  26 2917.31 319.635   7
   0  -2  26 2737.36 284.973   2
   0  -2 -26 2318.11 272.220   1
   0  -2  26 2539.96 322.396  12
   0   2  26 3058.72 267.004   2
   0  -2  27 774.588 216.184  12
   0  -2  27 398.055 188.107   7
   0  -2 -27 631.644 187.525   1
   0  -2  27 904.209 194.671   2
   0   2  27 871.956 225.631   7
   0   2 -27 392.375 157.663   1
   0   2  27 557.869 149.864   2
   0   2 -28 1037.89 218.679   1
   0  -2  28 707.282 177.161   2
   0  -2 -28 860.171 204.993   1
   0  -2  28 796.660 237.695  12
   0   2  28 787.608 212.891  12
   0   2  28 1135.96 186.593   2
   0   2  28 744.849 198.593   7
   0  -2  28 975.832 232.031   7
   0  -2  29 602.112 190.162   2
   0  -2  29 1395.34 277.395   7
   0   2 -29 443.013 178.670   1
   0   2  29 588.158 166.175   2
   0  -2  29 364.106 214.292  12
   0  -2 -29 617.996 184.370   1
   0   2  29 719.623 261.792  12
   0   2  29 601.729 206.915   7
   0   2 -30 383.010 164.110   1
   0   2  30 280.190 203.143   7
   0   2  30 620.794 260.574  12
   0  -2  30 174.273 184.221  12
   0  -2  30 876.898 215.754   2
   0  -2  30 316.523 210.794   7
   0  -2 -30 749.302 227.850   1
   0   2  31 1582.07 323.127  12
   0  -2  31 2773.25 382.006  12
   0  -2  31 2777.87 321.743   2
   0   2 -31 1784.66 272.047   1
   0  -2  31 1757.63 300.945   7
   0  -2 -31 2058.35 297.781   1
   0   2  31 2358.13 279.793   5
   0   2  31 1614.85 278.911   7
   0  -2 -32 722.431 201.072   1
   0  -2  32 936.611 277.418  12
   0  -2  32 1269.73 286.042   7
   0  -2  32 1144.29 227.250   2
   0   2 -32 848.970 219.592   1
   0   2  32 759.706 276.408  12
   0   2  32 1163.59 207.445   5
   0   2  32 582.330 224.059   7
   0  -2  33 584.507 234.862   7
   0   2  33 438.254 234.829   7
   0   2  33 350.102 177.072   5
   0  -2 -33 461.683 204.092   1
   0  -2  33 424.801 214.963  12
   0   2  33 503.456 265.665  12
   0   2 -33 585.645 204.235   1
   0  -2  34 10302.0 709.803  12
   0   2  34 11198.1 597.260   5
   0  -2 -34 10331.0 678.517   1
   0   2  34 9077.56 622.456   7
   0   2  34 11526.2 765.774  12
   0   2 -34 9901.16 628.929   1
   0  -2  34 9709.80 651.091   7
   0   2 -35 7517.99 564.510   1
   0  -2  35 6579.41 556.771   7
   0   2  35 7439.25 567.855   7
   0   2  35 7051.18 607.300  12
   0  -2  35 7456.75 632.739  12
   0  -2 -35 6848.26 555.033   1
   0  -2  36 668.983 266.642   7
   0   2  36 303.606 210.504  12
   0   2 -36 603.460 236.760   1
   0  -2  36 688.720 290.358  12
   0  -2 -36 783.411 261.934   1
   0  -2 -37 6930.39 564.263   1
   0  -2  37 6216.80 558.088   7
   0  -2  37 5830.22 578.053  12
   0   2  37 6292.69 602.365  12
   0   2 -37 6119.92 527.159   1
   0  -2 -38 613.526 209.635   1
   0  -2  38 429.477 246.437   7
   0   2 -38 74.3323 174.043   1
   0   3   0-11.8753 19.5515  11
   0  -3   0 10.0851 28.0700  10
   0   3   0 21.5171 29.6494   8
   0  -3   0 31.2105 17.9938  11
   0  -3   0 50.7993 25.6974   8
   0   3   0-12.5543 29.5410   6
   0   3   1 5566.51 159.796   8
   0   3   1 5519.36 170.510  10
   0   3   1 5448.66 172.753   6
   0  -3  -1 5353.78 159.590   8
   0  -3   1 5235.49 168.794   8
   0   3  -1 5238.94 168.786  10
   0   3  -1 5562.33 172.822   8
   0  -3   1 5350.46 169.692   6
   0   3  -1 5490.43 171.878   6
   0  -3   1 5012.55 167.055  10
   0  -3   2 1080.83 75.0719  10
   0   3  -2 989.934 76.2619   8
   0  -3  -2 1056.70 52.3880   4
   0   3  -2 1090.67 74.7219   6
   0   3   2 1135.53 64.5613   8
   0  -3  -2 998.351 74.3977   6
   0   3  -2 1049.17 75.6836  10
   0  -3   2 1099.11 78.2014   7
   0  -3   2 1013.80 74.2410   6
   0  -3   2 1087.89 79.3520   8
   0  -3  -2 991.949 63.3340   8
   0   3   2 991.606 50.8749   4
   0   3   2 1067.35 75.0525   6
   0   3  -3 2675.31 139.544   2
   0   3   3 2855.35 124.314   6
   0   3   3 2717.36 91.2442   4
   0   3  -3 2686.61 125.041   7
   0   3  -3 2653.89 126.255  10
   0  -3   3 2441.48 126.179   8
   0  -3  -3 2745.98 106.604   8
   0   3   3 2515.23 101.843   8
   0  -3  -3 2690.77 108.613   5
   0  -3   3 2815.24 126.549  10
   0  -3  -3 2708.43 123.489   6
   0   3  -3 2744.35 113.943  12
   0  -3   3 2625.85 123.967   7
   0   3  -3 2783.36 121.822   6
   0  -3   4 12489.2 302.348  12
   0  -3  -4 11097.4 304.719   6
   0  -3  -4 11426.7 277.124   8
   0   3  -4 11204.4 332.130   2
   0   3   4 11428.1 276.092   8
   0  -3  -4 12891.6 251.382   9
   0  -3   4 10671.0 293.678   1
   0  -3   4 11037.3 308.656   7
   0   3  -4 10312.3 310.027  10
   0  -3   4 11991.2 316.382  10
   0   3   4 11383.5 279.803   5
   0   3  -4 11358.2 309.253   7
   0  -3  -4 11110.6 278.900   5
   0   3  -4 12257.8 307.112  12
   0  -3   4 12681.2 341.857   2
   0  -3   4 10868.2 318.404   8
   0   3  -5 22429.7 544.018   2
   0  -3  -5 21452.0 425.408   9
   0   3  -5 21794.2 496.135   1
   0   3  -5 22621.2 521.340  10
   0  -3   5 22214.3 517.047   7
   0  -3   5 22349.9 516.369  10
   0  -3  -5 22598.7 474.601   8
   0  -3  -5 23213.8 480.559   5
   0   3   5 22268.1 471.580   8
   0   3  -5 22256.0 517.623  12
   0  -3   5 24085.7 514.578  12
   0   3  -5 23203.9 520.396   7
   0  -3   5 22706.1 505.010   1
   0  -3   5 23497.7 549.595   2
   0   3   5 22750.5 476.506   5
   0  -3   6 76103.2 1451.19  10
   0  -3   6 75172.2 1433.49   1
   0   3  -6 75730.5 1483.70   2
   0  -3   6 76389.3 1454.01   7
   0   3   6 77669.7 1398.19   5
   0   3  -6 76504.9 1452.86   7
   0  -3   6 81843.5 1494.50   2
   0  -3   6 76860.7 1447.33  12
   0   3  -6 74503.1 1425.30   1
   0   3  -6 75712.9 1455.92  10
   0   3   6 79593.8 1340.05   9
   0   3   6 77212.6 1396.26   8
   0  -3  -6 78768.8 1399.99   5
   0  -3  -6 80378.1 1449.75   7
   0   3  -7 64194.3 1263.62  10
   0  -3  -7 66314.2 1252.48   7
   0   3  -7 70177.6 1302.64   2
   0   3   7 64713.3 1197.16   5
   0  -3   7 66938.3 1290.30   2
   0   3   7 61444.6 1127.90   9
   0  -3   7 62867.0 1255.38   7
   0   3   7 63507.6 1196.12   8
   0  -3   7 66253.1 1245.53   1
   0   3  -7 61151.3 1226.13   1
   0   3  -7 65082.8 1259.32   7
   0  -3   7 66200.3 1264.99  12
   0   3   8 10824.7 271.722   9
   0  -3   8 11729.4 391.305   2
   0   3   8 12970.9 338.535   8
   0  -3   8 11815.3 383.003  12
   0  -3   8 12787.4 384.414   7
   0   3   8 12470.2 332.974   5
   0   3  -8 12216.1 363.070   1
   0   3  -8 12871.1 390.820  10
   0  -3   9 74897.2 1426.95  12
   0   3   9 69207.7 1327.54   5
   0   3  -9 70211.6 1412.18  10
   0  -3   9 71737.3 1404.65   7
   0   3   9 67873.1 1247.06   9
   0   3  -9 70679.8 1373.92   1
   0  -3   9 70030.6 1419.48   2
   0   3  10 14217.5 392.794   5
   0  -3  10 14211.9 448.625   7
   0   3 -10 13358.6 447.251  10
   0   3 -10 13902.0 427.137   1
   0  -3  10 13767.1 455.994  12
   0  -3  10 14381.2 463.933   2
   0   3 -11 10209.3 385.172  10
   0  -3  11 8965.75 370.245   2
   0  -3  11 10417.8 396.981  12
   0   3 -11 9665.34 357.246   1
   0  -3  11 10239.3 383.167   7
   0   3  11 9667.23 324.109   5
   0   3  11 9893.39 366.979   7
   0  -3 -12 8169.61 354.089   1
   0  -3  12 7682.17 351.478   2
   0   3 -12 7455.99 342.517  10
   0  -3  12 8065.82 364.548  12
   0   3  12 7441.25 325.423   7
   0   3 -12 7933.50 327.080   1
   0   3  12 7487.15 285.619   5
   0  -3  12 8021.43 347.062   7
   0  -3  13 23567.2 680.968   7
   0  -3 -13 23819.3 687.464   1
   0   3 -13 24137.2 663.672   1
   0   3  13 22856.6 660.964   7
   0  -3  13 22321.4 669.189   2
   0  -3  13 22470.8 687.010  12
   0  -3  14 5563.51 332.019  12
   0  -3 -14 5719.32 324.442   1
   0   3 -14 5820.89 305.936   1
   0  -3  14 6091.07 324.857   2
   0   3  14 6799.82 326.927   7
   0  -3  14 5947.09 318.485   7
   0  -3  15 913.572 157.012  12
   0  -3  15 1153.05 166.238   7
   0   3  15 877.267 143.559   7
   0  -3 -15 1026.65 151.396   1
   0  -3  15 1287.48 166.076   2
   0   3 -15 1295.66 160.614   1
   0   3 -16 8.19074 108.187   1
   0  -3  16 136.615 96.4398   2
   0  -3  16 335.925 133.418   7
   0  -3  16 150.941 119.248  12
   0   3  16 172.187 107.585   7
   0  -3 -16 82.0139 93.1675   1
   0  -3  17 122.699 120.174  12
   0  -3  17 357.732 125.951   2
   0  -3 -17 512.595 132.515   1
   0  -3  17 406.930 135.554   7
   0   3  17 391.042 129.347   7
   0   3 -17 420.636 108.714   1
   0   3  18 2027.63 226.721   7
   0  -3  18 1629.38 227.969  12
   0   3 -18 1598.39 197.343   1
   0  -3 -18 1770.92 216.119   1
   0  -3  18 1797.97 211.692   2
   0  -3  18 1962.71 225.865   7
   0  -3  19 15613.7 617.016   7
   0  -3  19 14771.0 625.599  12
   0   3  19 15984.1 604.316   7
   0   3 -19 13845.0 561.039   1
   0  -3  19 15130.9 590.698   2
   0  -3 -19 14765.7 597.044   1
   0  -3  20 2707.34 257.002   2
   0  -3  20 2697.48 284.081  12
   0  -3 -20 2075.18 236.340   1
   0   3  20 2659.79 253.735   7
   0  -3  20 2303.87 253.545   7
   0   3 -20 2399.21 241.318   1
   0  -3  21 346.898 140.912   2
   0  -3 -21 18.0424 139.869   1
   0  -3  21 218.541 144.422   7
   0   3 -21 354.512 154.114   1
   0  -3  21 347.722 168.588  12
   0   3  21 312.746 170.452   7
   0   3  22 16857.9 683.436   7
   0  -3  22 17942.5 683.734   2
   0  -3 -22 17122.1 692.796   1
   0  -3  22 19433.7 766.383  12
   0  -3  22 17988.6 711.313   7
   0   3 -22 17174.2 672.204   1
   0  -3 -23 1044.18 210.496   1
   0   3  23 1218.26 220.289   7
   0  -3  23 1408.33 231.489   7
   0   3 -23 1269.49 208.161   1
   0  -3  23 1524.29 252.865  12
   0  -3  23 1237.33 209.101   2
   0   3 -24 651.171 173.307   1
   0  -3  24 626.121 170.260   2
   0  -3 -24 603.701 202.685   1
   0   3  24 803.610 202.842   7
   0  -3  24 1033.40 217.967   7
   0  -3  24 1043.38 240.341  12
   0   3 -25 12132.4 588.274   1
   0  -3  25 12827.6 633.092   7
   0  -3  25 13905.0 617.610   2
   0   3  25 12432.4 615.078   7
   0  -3 -25 12654.7 625.562   1
   0   3  25 12991.7 548.408   5
   0  -3  25 13056.5 666.316  12
   0   3  25 12911.1 538.115   2
   0   3  26 1379.88 199.976   2
   0   3  26 1648.31 267.737   7
   0   3  26 1307.67 201.367   5
   0  -3  26 1629.46 299.754  12
   0  -3  26 1038.61 229.447   7
   0  -3  26 1607.30 242.450   2
   0  -3 -26 1729.45 271.561   1
   0   3 -26 1459.35 233.549   1
   0   3  27 6961.18 471.268   7
   0   3  27 6799.05 395.703   2
   0  -3  27 6808.92 448.256   2
   0  -3  27 6971.34 510.946  12
   0  -3  27 6536.10 475.294   7
   0  -3 -27 6533.20 455.998   1
   0   3  27 6647.20 403.093   5
   0   3 -27 6628.75 450.016   1
   0   3  28 1857.67 226.970   2
   0  -3 -28 1796.56 259.259   1
   0   3  28 2035.52 250.937   5
   0   3 -28 2099.26 276.080   1
   0   3  28 2669.25 325.919   7
   0  -3  28 2300.65 322.785   7
   0  -3  28 2661.12 364.521  12
   0  -3  28 2233.69 287.183   2
   0   3 -29 10031.5 581.136   1
   0  -3  29 10977.1 635.399   7
   0  -3  29 11273.0 601.343   2
   0   3  29 11289.7 629.590   7
   0   3  29 10336.0 528.162   5
   0  -3 -29 9719.03 589.039   1
   0   3  29 10602.0 674.751  12
   0  -3  29 10882.0 664.894  12
   0   3  30 16568.0 786.728   7
   0  -3  30 16892.6 811.162   7
   0   3  30 17067.1 701.799   5
   0  -3 -30 17173.2 795.206   1
   0   3 -30 16666.4 771.046   1
   0  -3  30 16300.2 751.072   2
   0  -3  30 17775.6 869.924  12
   0   3  30 17448.3 876.705  12
   0  -3  31 3144.79 350.569   2
   0  -3  31 3927.11 438.818  12
   0   3 -31 3722.60 374.106   1
   0  -3 -31 3188.83 355.432   1
   0   3  31 3356.10 318.460   5
   0   3  31 3411.21 411.456  12
   0  -3  31 2522.02 343.589   7
   0   3  32 145.060 135.355   5
   0  -3  32 490.213 220.044  12
   0  -3  32 105.027 186.965   7
   0  -3 -32 152.754 192.440   1
   0   3 -32 117.197 167.329   1
   0   3  32-182.058 218.390  12
   0  -3  32 213.298 157.976   2
   0  -3  33 719.219 229.263  12
   0   3 -33 939.018 226.572   1
   0   3  33 1278.95 223.225   5
   0  -3  33 1146.47 266.301   7
   0  -3 -33 1116.17 260.734   1
   0   3  33 1164.13 284.570  12
   0  -3  34 829.670 303.244  12
   0   3  34 811.856 279.817  12
   0   3 -34 371.509 210.930   1
   0  -3  34 541.229 224.899   7
   0  -3 -34 1138.53 266.156   1
   0   3 -35 11803.0 700.320   1
   0  -3  35 11006.9 712.639   7
   0  -3 -35 13011.8 747.695   1
   0  -3  35 10840.8 745.633  12
   0   3  35 12027.3 789.754  12
   0  -3  36 2781.95 386.334   7
   0   3  36 2865.48 426.890  12
   0   3 -36 2528.00 348.849   1
   0  -3 -36 3128.10 384.578   1
   0  -3  36 3295.29 451.084  12
   0   3 -37 1892.99 314.081   1
   0  -3 -37 2519.64 382.799   1
   0  -3  37 1768.98 344.839   7
   0   3  37 1345.72 335.588  12
   0  -3  37 1970.53 386.636  12
   0  -3 -38 7192.81 588.102   1
   0  -3  38 8190.02 634.192   7
   0   3 -38 7342.60 581.924   1
   0  -4   0 2347.74 82.9216  11
   0   4   0 2280.67 118.970   6
   0  -4   0 1933.57 111.127   6
   0  -4   0 2104.99 109.126   8
   0  -4   0 2340.59 116.906  10
   0   4   0 2358.74 115.545   8
   0   4   0 2368.44 121.845  10
   0  -4   1-7.98148 38.4416  10
   0  -4   1 56.9321 44.9620   6
   0   4   1-20.1398 38.3944   8
   0  -4  -1 225.385 48.2343  10
   0   4   1-32.0261 43.1301  10
   0  -4  -1-11.1802 47.0144   6
   0   4   1 42.4092 22.6411  11
   0   4  -1 38.3715 43.3377  10
   0   4   1-5.08435 36.1019   6
   0   4  -1 14.2056 38.7982   6
   0   4  -1 42.3838 51.6274   8
   0  -4   1 47.6446 34.7513   8
   0  -4  -1 75.8410 36.0300   8
   0  -4   2 6285.06 208.150  10
   0   4  -2 5990.98 204.318   6
   0   4   2 5970.65 185.710   8
   0  -4   2 5617.46 202.739   8
   0   4   2 5936.92 204.136  10
   0  -4  -2 6159.01 186.774   8
   0   4  -2 6353.56 217.465   8
   0  -4  -2 6085.10 157.694   4
   0  -4  -2 5897.37 208.108   6
   0   4  -2 5732.86 204.538  10
   0  -4   2 5698.69 204.542   6
   0   4   2 6127.17 207.105   6
   0  -4   3 46449.6 901.315   8
   0   4  -3 43698.1 919.466   2
   0  -4  -3 45226.7 845.507   8
   0   4   3 43392.7 840.388   8
   0   4  -3 45782.3 901.839   8
   0   4   3 44797.5 804.640   4
   0   4   3 46100.8 890.485   6
   0   4  -3 44289.9 885.329  10
   0  -4   3 42724.9 878.718   7
   0  -4   3 44150.6 881.022   6
   0  -4   3 42705.5 877.033  10
   0   4  -3 47307.7 851.406  12
   0  -4  -3 45406.2 804.708   4
   0  -4  -3 41065.9 875.519   6
   0   4  -3 44322.2 881.360   6
   0   4  -4 202.023 64.2804  10
   0  -4  -4 113.738 33.4277   8
   0  -4  -4 221.524 57.1473   6
   0   4  -4 182.344 48.6329   7
   0   4   4 105.050 41.9594   8
   0   4  -4 123.426 45.0240  12
   0   4   4 145.470 50.1058   6
   0   4  -4 149.635 61.2122   2
   0  -4   4 163.484 46.9272  10
   0  -4   4 98.3093 60.2214   7
   0   4  -4 123.017 44.4238   6
   0  -4   4 91.0089 43.8326   8
   0  -4  -4 163.447 44.3847   5
   0   4   4 152.155 34.2845   4
   0  -4  -5 541.704 61.8725   5
   0  -4   5 760.660 92.0302   7
   0   4  -5 660.929 98.3413   2
   0  -4   5 423.230 71.2104   1
   0  -4   5 494.568 74.8080   8
   0  -4  -5 632.848 63.8057   8
   0   4  -5 473.772 81.2342  10
   0   4  -5 583.674 73.1014  12
   0   4  -5 569.272 77.0411   7
   0  -4  -5 557.729 76.6610   6
   0   4  -5 511.378 67.7311   6
   0  -4   5 673.756 77.0177  12
   0  -4   5 667.304 82.3969  10
   0   4   5 510.981 54.9100   4
   0   4   5 658.766 67.8590   5
   0   4   5 579.010 64.8093   8
   0  -4  -5 571.891 47.7436   9
   0  -4  -6 535.983 47.9791   9
   0   4  -6 530.787 73.0082  12
   0  -4   6 521.328 98.8055   2
   0   4  -6 512.377 82.1545  10
   0  -4   6 409.744 74.8409  12
   0  -4  -6 465.494 59.9473   5
   0  -4  -6 396.729 55.0617   8
   0   4   6 498.444 62.0887   8
   0  -4   6 402.956 62.9112   1
   0   4   6 519.445 66.6141   5
   0  -4   6 400.196 74.4379   7
   0  -4  -6 492.436 77.0297   6
   0   4  -7 43889.8 925.890  10
   0   4  -7 43952.9 913.938  12
   0  -4   7 43333.9 952.465   2
   0   4   7 42448.9 847.581   5
   0   4   7 41876.2 842.192   8
   0  -4  -7 42618.1 856.011   5
   0  -4  -7 40686.6 773.001   9
   0   4  -7 42152.2 885.286   1
   0  -4   7 43638.9 915.363   7
   0  -4   7 43038.0 895.814  12
   0   4  -8 36500.8 843.351  10
   0  -4   8 37006.1 833.898  12
   0  -4  -8 37734.2 777.009   5
   0  -4   8 38802.4 883.977   2
   0   4   8 37664.7 773.749   8
   0   4   8 36075.2 769.729   5
   0  -4   8 35702.4 834.461   7
   0   4   8 38193.8 703.731   9
   0   4  -8 37040.8 813.226   1
   0  -4   9 9823.00 358.729  12
   0   4  -9 10052.7 369.810  10
   0   4   9 11042.8 259.696   9
   0  -4   9 9942.22 363.450   7
   0  -4   9 10088.9 385.623   2
   0   4   9 9769.69 309.908   8
   0   4  -9 10122.6 342.460   1
   0   4   9 10393.1 316.056   5
   0  -4  10 19795.2 592.763   2
   0   4  10 19956.8 433.556   9
   0  -4  10 19707.1 569.506  12
   0   4 -10 20895.1 590.647  10
   0   4 -10 20230.6 550.114   1
   0  -4  10 21037.1 582.477   7
   0   4  10 20632.0 515.205   8
   0   4  10 20388.2 512.091   5
   0   4  11 12300.9 374.943   8
   0   4 -11 12202.9 438.062  10
   0   4  11 12656.4 375.791   5
   0  -4  11 11484.0 436.363   2
   0   4 -11 12156.6 408.394   1
   0  -4  11 11695.0 426.394  12
   0   4  11 11752.5 298.399   9
   0  -4  11 11994.5 429.703   7
   0  -4  12 9471.20 393.189  12
   0   4  12 9606.48 329.962   8
   0   4 -12 8737.39 355.653   1
   0   4  12 8702.38 256.426   9
   0  -4  12 9597.82 384.890   7
   0   4 -12 9212.78 393.077  10
   0   4  12 9499.78 327.589   5
   0  -4  12 9747.30 402.430   2
   0  -4  13 38692.1 945.527   7
   0   4 -13 39005.2 911.620   1
   0  -4  13 38036.5 953.547  12
   0   4  13 37837.7 848.948   5
   0   4 -13 37966.8 954.917  10
   0   4  13 34970.4 738.725   9
   0  -4  13 35413.7 936.321   2
   0   4  14 27.7924 36.1624   9
   0  -4  14 216.292 113.816   7
   0   4 -14-45.3644 109.862  10
   0   4 -14 55.2038 99.0604   1
   0  -4  14 361.937 151.357   2
   0  -4  14 149.567 116.560  12
   0   4  14 10.4420 62.3786   5
   0   4 -15 1272.65 163.175   1
   0   4  15 1335.99 98.8308   9
   0  -4 -15 1550.36 192.136   1
   0   4  15 1089.56 128.401   5
   0  -4  15 1651.33 198.895   7
   0  -4  15 1453.36 179.898  12
   0   4 -15 1170.44 169.539  10
   0  -4  15 1714.26 195.923   2
   0   4  16 7472.13 325.180   5
   0  -4  16 7739.53 399.076  12
   0  -4  16 8327.63 399.313   2
   0   4  16 7468.77 257.352   9
   0   4 -16 7105.11 357.765   1
   0  -4 -16 7841.27 390.782   1
   0  -4  16 7160.27 381.369   7
   0   4  17 215.113 121.754   5
   0  -4  17 43.5488 120.234   7
   0  -4  17 243.495 179.457  12
   0  -4 -17 172.844 119.590   1
   0  -4  18 60326.1 1421.15   2
   0   4  18 60069.2 1299.89   5
   0  -4  18 54367.4 1417.72  12
   0  -4  18 58875.7 1423.75   7
   0   4 -18 55705.5 1360.22   1
   0  -4 -18 59225.3 1428.52   1
   0  -4  19 5267.37 364.343   2
   0  -4 -19 4453.29 353.410   1
   0  -4  19 4591.17 358.164  12
   0   4 -19 4376.78 327.613   1
   0  -4  19 4848.79 342.422   7
   0   4  19 4552.39 283.245   5
   0  -4  20 369.242 145.427   2
   0  -4 -20 165.573 145.863   1
   0  -4  20 232.549 160.179  12
   0  -4  20 175.783 139.458   7
   0   4  20 231.015 105.294   5
   0   4 -20 38.3899 111.839   1
   0  -4  21 7487.89 427.073   2
   0  -4  21 6755.69 446.152  12
   0  -4 -21 6430.81 410.954   1
   0  -4  21 6753.92 428.949   7
   0   4  21 6674.69 348.006   5
   0   4 -21 6506.01 398.445   1
   0   4  22 22622.4 723.425   5
   0  -4 -22 23161.6 843.322   1
   0   4 -22 23470.7 806.699   1
   0  -4  22 23651.4 821.620   2
   0  -4  22 24612.3 853.228   7
   0  -4  22 22337.8 853.873  12
   0   4  23 11359.5 492.285   5
   0  -4  23 10995.3 574.576   7
   0  -4 -23 11869.3 586.589   1
   0  -4  23 11703.4 615.259  12
   0   4 -23 11395.1 556.242   1
   0  -4  23 12157.4 574.890   2
   0  -4  24 15785.1 675.702   2
   0  -4  24 15759.6 701.573   7
   0  -4 -24 15017.3 682.632   1
   0  -4  24 15566.7 717.194  12
   0   4 -24 14774.4 642.231   1
   0   4  24 15424.3 589.209   5
   0   4 -25 4731.74 375.556   1
   0  -4  25 4576.15 396.440   7
   0  -4  25 4527.18 377.962   2
   0  -4 -25 4763.54 397.121   1
   0   4  25 4741.90 337.786   5
   0  -4  25 4658.05 412.623  12
   0   4 -26 9112.38 525.675   1
   0  -4  26 9668.56 596.499  12
   0   4  26 9361.93 471.525   5
   0  -4  26 8909.19 555.882   7
   0  -4 -26 9360.76 547.249   1
   0  -4  26 9762.26 542.073   2
   0   4 -27 27534.1 975.717   1
   0  -4 -27 26616.2 1000.57   1
   0  -4  27 28366.5 1028.57   7
   0   4  27 28410.2 877.419   2
   0  -4  27 27955.2 987.532   2
   0  -4  27 28495.1 1072.72  12
   0   4  27 28162.1 896.680   5
   0  -4  28 2270.93 326.326   7
   0   4  28 2445.00 260.817   5
   0  -4 -28 2400.18 306.330   1
   0  -4  28 2381.78 311.877   2
   0   4 -28 2136.81 289.802   1
   0  -4  28 2886.23 373.118  12
   0  -4 -29 1587.97 270.291   1
   0   4 -29 1239.23 235.838   1
   0  -4  29 1500.98 294.147  12
   0   4  29 1306.87 218.068   5
   0  -4  29 1451.68 276.686   7
   0  -4  29 1406.25 251.733   2
   0  -4  30 5101.75 427.463   2
   0   4 -30 4471.31 402.367   1
   0  -4  30 4134.78 407.354   7
   0   4  30 4777.12 358.491   5
   0  -4  30 4939.17 480.566  12
   0  -4 -30 4143.15 403.385   1
   0   4  31 75.0335 189.546  12
   0  -4  31 164.887 200.465   7
   0  -4  31-38.8170 164.948   2
   0   4  31 339.522 165.008   5
   0  -4  31 73.0463 222.276  12
   0   4 -31 224.365 187.184   1
   0  -4 -31 82.4202 166.590   1
   0   4 -32 2170.42 310.466   1
   0   4  32 1443.18 314.991  12
   0   4  32 1883.70 272.791   8
   0  -4  32 1926.40 332.740  12
   0  -4  32 2215.93 343.735   7
   0   4  32 2259.32 268.530   5
   0  -4 -32 1934.63 304.707   1
   0   4  33 12418.2 788.335  12
   0  -4 -33 12542.5 713.697   1
   0  -4  33 11531.3 709.288   7
   0  -4  33 12903.4 778.256  12
   0   4 -33 11658.0 674.631   1
   0   4  33 11779.0 623.692   8
   0  -4  34 495.488 232.539  12
   0  -4 -34 794.292 246.597   1
   0   4  34 893.094 213.980   8
   0   4 -34 998.897 255.702   1
   0   4  34 767.786 265.212  12
   0  -4  34 788.986 264.632   7
   0  -4  35 513.743 272.164  12
   0   4  35 439.616 239.309  12
   0   4  35 779.960 211.881   8
   0  -4  35 1475.91 320.656   7
   0   4 -35 578.364 211.877   1
   0  -4 -35 1078.46 266.490   1
   0   4 -36 472.324 219.441   1
   0  -4  36 519.885 271.002  12
   0   4  36 581.502 278.213  12
   0  -4 -36 998.239 267.587   1
   0  -4  36 568.230 223.887   7
   0   4  37 6193.18 603.884  12
   0  -4 -37 5581.74 512.119   1
   0  -4  37 6616.52 602.863  12
   0  -4  37 6490.20 576.285   7
   0   4 -37 6180.58 528.175   1
   0   4 -38 547.299 210.506   1
   0  -5   0 92.8302 30.8404  11
   0  -5   0 14.4100 40.6838   8
   0  -5   0-12.3087 49.1893   6
   0   5   0-49.3425 59.2296  10
   0   5   0 56.9791 38.4036   6
   0   5   0 22.2382 47.6594   8
   0  -5   0 2.76761 45.3816  10
   0  -5   1 57415.4 1055.02  11
   0   5  -1 55721.0 1129.72   8
   0   5   1 58904.4 1118.35   8
   0  -5   1 60082.4 1136.43   8
   0  -5  -1 58346.6 1113.15   8
   0  -5   1 59579.9 1137.56  10
   0   5   1 60670.2 1140.46  10
   0  -5  -1 58770.0 1136.55  10
   0   5  -1 58409.4 1138.50  10
   0   5  -1 58414.2 1140.57   6
   0   5   1 58586.6 1143.42   6
   0  -5  -1 59801.3 1145.74   6
   0   5   1 61584.3 1040.01  11
   0  -5   1 57815.3 1139.53   6
   0  -5  -2 88792.2 1616.37   8
   0  -5   2 88165.0 1656.80   6
   0  -5   2 95502.8 1663.61  10
   0   5  -2 91724.2 1661.67   6
   0  -5  -2 87208.3 1658.34   6
   0   5  -2 84491.6 1647.67  10
   0   5   2 92842.2 1666.88   6
   0   5   2 90061.5 1656.74  10
   0  -5   2 88482.0 1655.82   8
   0  -5  -2 91593.0 1563.18   4
   0   5   2 92244.0 1550.78  11
   0   5   2 89056.7 1618.29   8
   0   5  -2 87668.5 1657.74   8
   0  -5  -3 4213.06 138.148   4
   0   5  -3 4360.62 188.938   6
   0  -5  -3 4418.73 167.904   8
   0  -5   3 4451.57 200.005   8
   0  -5   3 4396.60 190.988  10
   0  -5  -3 4576.78 197.861   6
   0  -5   3 4189.77 190.060   7
   0   5  -3 4168.79 190.557  10
   0   5   3 4234.04 192.034   6
   0  -5   3 4205.49 189.694   6
   0   5  -3 4834.19 211.642   8
   0   5  -3 4621.94 217.872   2
   0   5   3 4460.70 173.281   8
   0  -5   4 4440.59 202.765   7
   0   5   4 4985.95 152.483   4
   0   5  -4 4628.59 201.276   6
   0   5  -4 4471.73 204.788  10
   0  -5  -4 4741.07 175.661   8
   0  -5  -4 4868.01 184.100   5
   0   5   4 4946.58 181.668   8
   0  -5  -4 4621.79 152.289   4
   0  -5  -4 4717.06 207.028   6
   0   5  -4 5033.38 186.461  12
   0  -5   5 2889.74 165.914   7
   0  -5  -5 2778.25 134.417   8
   0   5  -5 3164.37 152.631  12
   0   5   5 2781.33 139.039   8
   0  -5  -5 2929.32 141.492   5
   0   5   5 2819.94 115.407   4
   0  -5  -5 2775.86 162.190   6
   0   5  -5 3147.41 172.533  10
   0   5   6 10125.2 265.899   4
   0   5   6 9819.17 290.427   8
   0  -5   6 10067.4 339.677   7
   0   5  -6 10798.1 330.732  12
   0  -5  -6 10312.5 255.964   9
   0  -5  -6 10136.6 293.031   8
   0  -5  -6 10102.9 334.680   6
   0  -5  -6 10068.5 297.184   5
   0   5  -6 9845.23 337.468  10
   0  -5  -7 22249.0 506.333   8
   0   5   7 21061.1 498.630   8
   0  -5  -7 21001.2 441.824   9
   0   5   7 21309.1 478.303   4
   0   5   7 21098.9 507.043   5
   0  -5   7 21430.9 566.115   7
   0  -5  -7 22092.6 512.220   5
   0  -5  -7 21666.2 560.473   6
   0   5  -7 21645.1 552.216  12
   0   5  -7 21991.6 572.834  10
   0  -5   7 20134.8 527.875  12
   0  -5   8 21139.9 535.374  12
   0  -5  -8 18846.8 526.616   6
   0  -5  -8 20766.0 488.481   5
   0   5  -8 20475.0 553.771  10
   0   5   8 20354.4 483.188   8
   0  -5  -8 17763.7 405.217   9
   0  -5   8 20195.9 551.056   7
   0   5   8 18902.6 480.334   5
   0  -5   8 18144.5 564.854   2
   0   5   9 20733.5 515.652   8
   0   5  -9 22009.3 600.332  10
   0  -5   9 21765.4 629.900   2
   0  -5   9 21397.0 571.827  12
   0  -5  -9 21109.9 519.962   5
   0  -5  -9 20681.8 569.479   6
   0  -5   9 21146.8 588.761   7
   0   5   9 20651.7 521.265   5
   0   5 -10 21003.7 579.454   1
   0  -5  10 20433.5 633.059   2
   0   5 -10 21064.3 619.981  10
   0  -5  10 22020.0 619.261   7
   0   5  10 22141.4 549.866   5
   0  -5  10 20969.7 599.932  12
   0   5  10 22627.3 466.623   9
   0   5  10 22204.1 545.927   8
   0   5  11 997.620 105.991   8
   0   5 -11 1088.27 122.095   1
   0  -5  11 1075.62 167.703   2
   0   5  11 1115.91 111.785   5
   0  -5  11 942.275 137.596   7
   0  -5  11 958.786 131.983  12
   0   5  11 1021.63 73.5576   9
   0   5 -11 925.501 137.215  10
   0   5  12 18204.6 499.928   8
   0  -5  12 16611.2 554.080  12
   0   5 -12 17528.0 538.239   1
   0  -5  12 17293.4 565.826   7
   0   5  12 17801.4 403.245   9
   0   5  12 16904.0 485.731   5
   0  -5  12 17366.7 593.547   2
   0   5 -12 17994.8 576.815  10
   0   5 -13 35394.8 898.971   1
   0  -5  13 35640.1 930.578  12
   0  -5  13 36885.8 945.677   7
   0   5  13 36646.8 847.594   8
   0   5  13 37876.8 736.276   9
   0   5  13 36133.7 842.680   5
   0   5 -13 38527.9 964.002  10
   0  -5  13 34540.2 950.834   2
   0  -5  14 4828.02 339.845   2
   0   5 -14 3665.82 245.579   1
   0   5  14 4117.75 165.590   9
   0   5  14 3566.39 217.068   5
   0   5 -14 3932.15 271.802  10
   0   5  14 3982.12 229.058   8
   0  -5  14 3621.06 263.338   7
   0  -5  14 4215.11 287.133  12
   0  -5  15 100420. 2056.37   7
   0   5 -15 101768. 2085.18  10
   0  -5  15 101388. 2082.57   2
   0  -5  15 94797.0 2039.42  12
   0   5  15 100296. 1921.47   5
   0   5 -15 101907. 2006.86   1
   0   5  15 98416.3 1925.32   8
   0   5  15 96217.2 1772.92   9
   0   5  16 2388.31 132.115   9
   0   5  16 2516.53 190.195   8
   0   5 -16 2897.17 246.614   1
   0  -5  16 2855.88 274.303   7
   0  -5  16 3349.10 295.767  12
   0  -5  16 3539.45 308.718   2
   0   5  16 2619.15 197.416   5
   0   5 -16 2519.15 249.628  10
   0   5 -17 191.229 124.010  10
   0   5  17 318.244 102.124   8
   0  -5  17 130.689 129.099   2
   0   5  17 262.965 58.2449   9
   0  -5  17 312.533 144.516   7
   0   5 -17 414.456 116.383   1
   0   5  17 228.933 84.7441   5
   0  -5  17 120.653 128.843  12
   0  -5 -17 258.080 141.593   1
   0   5  18 63.7027 79.4751   5
   0   5  18 140.685 50.4691   9
   0  -5 -18 4.49231 130.711   1
   0   5 -18 21.0892 104.141   1
   0  -5  18 149.367 120.969   2
   0  -5  18-6.60922 104.011  12
   0  -5  18 128.178 131.914   7
   0   5  18 124.825 80.7784   8
   0   5  19 971.022 144.899   5
   0  -5  19 1175.54 192.142  12
   0   5 -19 1479.16 205.949   1
   0   5  19 1429.48 173.212   8
   0  -5  19 1117.80 198.630   2
   0  -5 -19 1195.75 197.412   1
   0  -5  19 1464.43 220.964   7
   0   5  20 14030.6 531.991   8
   0  -5  20 14662.9 636.966  12
   0  -5  20 15765.9 643.819   7
   0  -5  20 14608.6 628.953   2
   0  -5 -20 14559.1 636.384   1
   0   5  20 15206.5 532.798   5
   0   5 -20 13872.6 581.705   1
   0  -5  21 30077.8 962.055   2
   0  -5  21 30591.3 987.280  12
   0  -5 -21 30682.7 978.042   1
   0   5  21 29815.7 849.914   8
   0   5  21 28759.0 830.221   5
   0   5 -21 30286.5 924.598   1
   0  -5  21 28665.9 952.698   7
   0  -5  22 5889.16 406.174   2
   0   5 -22 4895.63 365.353   1
   0   5  22 4529.23 313.521   8
   0  -5  22 5128.09 398.779  12
   0  -5 -22 4929.06 384.888   1
   0  -5  22 5387.87 395.153   7
   0   5  22 4929.72 314.408   5
   0   5 -23 6982.01 425.913   1
   0  -5  23 6829.43 442.521   2
   0  -5  23 7342.82 474.425  12
   0   5  23 7760.28 392.227   5
   0  -5  23 6942.51 453.061   7
   0   5  23 6708.36 379.681   8
   0  -5 -23 7578.64 465.948   1
   0   5 -24 1311.38 228.294   1
   0  -5 -24 889.906 214.223   1
   0   5  24 1071.75 180.062   8
   0  -5  24 1599.27 257.941   7
   0  -5  24 1699.71 249.364   2
   0  -5  24 1509.71 260.670  12
   0   5  24 1220.94 200.272   5
   0   5 -25 11911.7 589.025   1
   0  -5 -25 12913.6 648.723   1
   0  -5  25 10990.6 619.960  12
   0   5  25 12399.8 533.458   5
   0  -5  25 13295.3 650.963   7
   0  -5  25 13709.8 643.628   2
   0   5  25 12704.8 550.403   8
   0  -5  26 977.606 239.398   2
   0  -5 -26 294.796 193.309   1
   0  -5  26 405.161 196.368   7
   0  -5  26 437.043 198.098  12
   0   5 -26 584.078 190.426   1
   0   5  26 153.192 121.503   5
   0   5  26 506.599 164.067   8
   0  -5  27 3358.19 366.066  12
   0   5 -27 3227.16 319.536   1
   0  -5  27 3165.90 349.004   7
   0   5  27 3260.39 282.531   5
   0  -5 -27 3049.39 327.986   1
   0   5  27 2456.06 258.356   8
   0  -5  27 3852.62 373.690   2
   0  -5  28 792.782 252.553  12
   0   5 -28 229.146 161.166   1
   0  -5 -28 359.384 187.104   1
   0   5  28 381.220 161.097   8
   0  -5  28 434.251 189.789   2
   0  -5  28 215.527 195.429   7
   0   5  28 405.000 155.029   5
   0   5  29 9715.97 500.499   5
   0  -5 -29 9298.91 581.587   1
   0  -5  29 9992.86 609.050   7
   0   5 -29 9422.37 556.875   1
   0   5  29 9558.45 513.879   8
   0  -5  29 9601.01 615.059  12
   0  -5 -30 2298.66 309.635   1
   0  -5  30 1315.40 277.080   7
   0   5 -30 2810.03 321.745   1
   0   5  30 1553.80 242.369   8
   0   5  30 1311.92 208.718   5
   0  -5  30 1955.95 339.775  12
   0  -5 -31 1135.60 249.947   1
   0  -5  31 676.874 229.050   7
   0   5 -31 1300.76 249.167   1
   0   5  31 916.861 177.334   5
   0  -5  31 1010.41 263.845  12
   0   5  31 1008.15 204.692   8
   0  -5  32 807.946 240.947   7
   0   5  32 1126.13 294.041  12
   0  -5 -32 973.227 242.135   1
   0   5  32 1160.51 225.192   8
   0  -5  32 1070.72 278.525  12
   0   5 -32 588.889 204.753   1
   0   5  33 2626.40 392.445  12
   0  -5 -33 2406.60 342.850   1
   0   5  33 2508.42 308.646   8
   0  -5  33 2352.62 357.355   7
   0  -5  33 3028.35 401.042  12
   0   5 -33 2264.56 309.081   1
   0   5 -34 3761.99 404.982   1
   0  -5 -34 3968.70 416.821   1
   0  -5  34 4165.73 475.077  12
   0   5  34 4250.82 385.938   8
   0   5  34 4031.90 469.928  12
   0  -5  34 4483.56 466.902   7
   0   5  35 846.299 279.145  12
   0  -5 -35 835.060 260.908   1
   0  -5  35 835.658 280.290   7
   0  -5  35 430.282 240.086  12
   0   5 -35 1063.92 256.392   1
   0  -5 -36 1167.42 288.884   1
   0  -5  36 1208.77 278.652   7
   0   5  36 1394.44 321.904  12
   0   5 -36 1466.46 290.679   1
   0  -5  36 1771.81 333.417  12
   0   5 -37 6721.33 541.315   1
   0  -5  37 6740.89 617.469  12
   0  -5 -37 7438.68 604.355   1
   0   5  37 7595.45 656.125  12
   0  -5  37 6575.29 581.392   7
   0   5 -38 1323.17 288.801   1
   0   6   0 90.5212 65.5308  10
   0  -6   0 194.313 35.5750  11
   0  -6   0 229.396 67.6364   6
   0  -6   0 245.980 63.5323   8
   0   6   0 258.880 71.1581   8
   0  -6  -1 11355.3 325.737   8
   0  -6   1 11052.9 270.498  11
   0   6   1 11724.6 261.648  11
   0  -6   1 11369.8 352.546   6
   0  -6   1 10410.0 332.082   8
   0   6   1 10511.5 340.208  10
   0   6  -1 10424.2 340.350  10
   0   6  -1 11556.8 348.353   8
   0  -6  -1 10793.6 345.773   6
   0   6   1 11239.0 333.027   8
   0  -6   2 25531.1 611.015   6
   0  -6  -2 25665.5 521.067   4
   0   6   2 25276.8 579.561   8
   0   6   2 26443.1 505.906  11
   0   6  -2 24858.5 613.376   8
   0  -6  -2 24973.9 612.666   6
   0   6  -2 25928.9 618.277  10
   0   6   2 25432.9 610.702  10
   0  -6  -2 24627.8 575.029   8
   0  -6  -3 37494.8 763.292   8
   0  -6  -3 36423.1 809.253   6
   0   6   3 35359.3 757.722   8
   0  -6   3 35452.0 804.629   6
   0   6   3 36771.3 693.409  11
   0   6  -3 37423.9 811.190  10
   0  -6   3 36689.0 805.738   7
   0  -6  -3 36775.8 701.397   4
   0   6  -3 36216.9 818.267   8
   0   6   3 35810.9 800.392  10
   0   6  -4 19821.4 539.214  10
   0  -6  -4 21120.7 443.822   4
   0  -6   4 20813.6 539.816   6
   0  -6  -4 20544.5 539.919   6
   0   6  -4 20205.2 552.113   8
   0  -6   4 21175.0 543.745   7
   0  -6  -4 21203.9 494.308   8
   0   6   4 19840.9 490.772   8
   0   6  -4 21802.9 498.655  12
   0  -6   5 4722.09 228.504   7
   0  -6  -5 4323.59 221.322   6
   0   6   5 4816.88 160.978   4
   0   6   5 4600.50 194.898   8
   0   6  -5 4869.24 201.246  12
   0  -6  -5 4940.95 202.435   5
   0  -6  -5 4985.07 195.022   8
   0   6  -5 4613.30 226.809  10
   0   6  -6 2748.37 157.765  12
   0   6  -6 2586.34 176.431  10
   0   6   6 2824.46 147.132   8
   0  -6  -6 2882.97 153.446   5
   0  -6  -6 2494.46 137.679   8
   0  -6   6 2677.93 175.439   7
   0  -6  -6 2813.86 177.736   6
   0   6   6 2856.89 123.842   4
   0  -6  -7 136.761 50.8893   5
   0   6   7 52.1826 36.3257   4
   0  -6  -7 32.5055 71.3925   6
   0  -6  -7 75.9914 43.8951   8
   0  -6   7-99.4934 84.5699   7
   0   6   7 35.1236 48.1443   8
   0   6  -7 20.3229 79.9670  10
   0  -6  -7 13.9406 32.7753   9
   0   6   8 57387.5 1137.26   8
   0   6   8 58812.9 1100.13   4
   0  -6  -8 56957.1 1059.83   9
   0  -6   8 57625.3 1227.35   7
   0  -6  -8 57426.4 1216.84   6
   0   6  -8 57515.2 1230.34  10
   0   6  -9 38.7920 79.8744  10
   0  -6   9 229.529 84.2524  12
   0  -6  -9 80.6951 79.3776   6
   0   6   9 181.849 60.1867   8
   0  -6   9 87.1901 87.3548   7
   0   6   9 156.216 62.1965   5
   0   6   9 72.6749 48.0676   4
   0  -6  -9 128.887 39.1547   9
   0  -6  10 59728.8 1245.08  12
   0  -6 -10 58646.3 1257.92   6
   0   6  10 57561.8 1172.06   8
   0   6  10 59501.0 1187.05   5
   0  -6  10 57254.4 1271.73   7
   0   6 -10 57376.7 1281.61  10
   0  -6  11 19573.1 603.907   7
   0  -6  11 21242.9 668.328   2
   0   6  11 18990.9 520.037   5
   0   6 -11 19368.6 611.930  10
   0   6  11 19480.4 520.840   8
   0  -6  11 18512.6 571.714  12
   0  -6 -11 19462.9 582.169   6
   0   6  12 633.889 93.7246   8
   0   6  12 906.500 110.549   5
   0   6 -12 937.488 152.670  10
   0  -6  12 829.557 143.948   7
   0  -6  12 954.872 165.803   2
   0  -6 -12 752.571 124.977   6
   0  -6  12 956.187 135.707  12
   0  -6  13 15117.9 565.540   2
   0   6 -13 15199.0 546.644  10
   0   6  13 15160.8 458.802   5
   0   6  13 14758.0 455.815   8
   0  -6  13 13648.6 508.589  12
   0  -6  13 15371.5 544.233   7
   0   6 -13 14247.8 498.165   1
   0  -6  14 46321.1 1109.13  12
   0  -6  14 44666.7 1107.85   7
   0   6  14 44838.2 865.742   9
   0  -6  14 41126.6 1116.29   2
   0   6 -14 43023.6 1053.87   1
   0   6 -14 44313.3 1120.04  10
   0   6  14 42462.7 984.221   8
   0   6  14 44058.2 989.157   5
   0  -6  15 1135.23 189.360  12
   0   6  15 829.405 117.014   5
   0   6  15 652.427 67.2888   9
   0   6  15 631.236 107.445   8
   0   6 -15 1103.69 157.920   1
   0  -6  15 1255.17 210.155   2
   0  -6  15 749.281 157.542   7
   0   6 -15 639.569 144.528  10
   0  -6  16 16607.0 612.737   7
   0   6 -16 16517.6 575.980   1
   0   6  16 16688.8 527.355   8
   0   6  16 16551.4 521.116   5
   0  -6  16 14893.1 610.337   2
   0  -6  16 16044.3 604.560  12
   0   6 -16 16487.8 631.985  10
   0   6  16 16776.5 410.191   9
   0  -6  17 12464.7 534.398  12
   0  -6  17 12777.9 544.296   7
   0   6  17 12349.7 445.894   5
   0  -6  17 12442.8 551.043   2
   0   6 -17 12115.6 541.247  10
   0   6  17 12429.5 345.067   9
   0   6  17 12691.6 460.218   8
   0   6 -17 12697.3 502.766   1
   0   6 -18 860.700 185.706  10
   0  -6  18 1533.51 226.335   2
   0  -6  18 1547.49 226.079  12
   0  -6 -18 1871.80 248.841   1
   0   6  18 1153.68 143.942   5
   0   6  18 992.947 89.6227   9
   0   6  18 1051.62 146.757   8
   0   6 -18 1161.85 184.831   1
   0  -6  18 1239.42 205.176   7
   0   6  19 15505.0 538.721   5
   0   6  19 15568.7 416.529   9
   0   6  19 15845.4 550.415   8
   0  -6  19 16125.9 648.142  12
   0   6 -19 16345.2 664.913  10
   0  -6 -19 17520.0 670.592   1
   0  -6  19 15748.9 638.668   7
   0   6 -19 15039.1 593.316   1
   0  -6  19 15146.2 645.702   2
   0  -6  20 0.69932 159.131   7
   0   6  20 103.448 121.571   8
   0  -6  20 70.9746 148.213  12
   0  -6 -20 21.5037 149.524   1
   0  -6  20 452.899 192.093   2
   0   6  20 82.5264 110.556   5
   0   6 -20 205.470 154.361   1
   0  -6  21 9802.60 521.469   2
   0  -6  21 9650.08 516.671   7
   0  -6  21 9880.35 524.669  12
   0   6  21 9978.56 434.911   5
   0   6  21 9834.34 437.838   8
   0  -6 -21 9671.11 524.658   1
   0   6 -21 9781.92 479.525   1
   0  -6  22 200.486 171.027   7
   0  -6  22 39.1348 148.000  12
   0   6 -22 279.874 153.213   1
   0   6  22 82.4524 118.658   8
   0   6  22 66.3514 93.6748   5
   0  -6 -22 76.7298 156.192   1
   0  -6  22 150.772 159.216   2
   0   6 -23 2002.10 235.112   1
   0   6  23 1980.67 210.969   8
   0  -6  23 1741.13 244.823  12
   0   6  23 1702.34 191.523   5
   0  -6  23 1981.03 269.898   2
   0  -6 -23 2057.25 263.062   1
   0  -6  23 2091.89 268.811   7
   0   6 -24 1416.23 225.313   1
   0   6  24 1435.13 218.351   8
   0  -6  24 1362.66 256.500   7
   0  -6  24 1245.10 245.458  12
   0  -6  24 1404.39 257.670   2
   0   6  24 1154.84 185.458   5
   0  -6 -24 1732.98 270.357   1
   0  -6  25 17896.6 769.977   2
   0  -6  25 17135.0 773.844   7
   0  -6  25 16469.4 763.787  12
   0   6  25 17730.6 652.016   5
   0  -6 -25 17197.7 764.374   1
   0   6 -25 17334.2 719.215   1
   0   6  25 17176.0 658.683   8
   0   6 -26 16509.4 712.413   1
   0   6  26 15795.9 645.489   8
   0  -6  26 17031.4 788.735  12
   0  -6 -26 15971.4 753.241   1
   0   6  26 16353.7 639.224   5
   0  -6  26 17313.8 778.992   7
   0   6  27 2164.44 259.810   8
   0  -6 -27 2495.67 321.934   1
   0   6  27 2129.97 248.270   5
   0  -6  27 1866.50 307.186   7
   0  -6  27 2210.95 323.869  12
   0   6 -27 1830.60 277.349   1
   0  -6  28 165.736 175.591  12
   0   6  28 182.366 123.097   5
   0  -6  28 573.446 225.479   7
   0  -6 -28 52.9161 157.676   1
   0   6  28 289.143 142.324   8
   0   6 -28 364.267 174.718   1
   0  -6  29 3215.41 384.145  12
   0   6  29 2944.83 297.752   8
   0   6  29 2569.69 266.409   5
   0  -6 -29 2907.66 361.893   1
   0   6 -29 2477.28 311.459   1
   0  -6  29 2608.77 348.860   7
   0  -6  30 8272.07 571.283   7
   0  -6  30 8337.25 584.843  12
   0   6 -30 7670.60 517.613   1
   0  -6 -30 8335.02 568.257   1
   0   6  30 8353.39 473.232   5
   0   6  30 8070.79 480.906   8
   0   6 -31 2760.70 337.432   1
   0  -6  31 1909.16 334.519  12
   0  -6  31 2389.02 364.203   7
   0   6  31 1949.52 269.803   8
   0  -6 -31 1790.70 334.117   1
   0  -6  32 21098.0 998.399  12
   0   6  32 21284.5 843.161   8
   0   6 -32 21541.8 930.035   1
   0  -6 -32 23390.9 1007.82   1
   0  -6  32 23650.2 1015.99   7
   0   6 -33 854.401 241.314   1
   0   6  33 677.584 256.663  12
   0  -6 -33 616.367 251.800   1
   0  -6  33 410.500 198.874   7
   0   6  33 589.207 201.097   8
   0  -6  33 499.093 244.078  12
   0   6 -34 3149.04 374.552   1
   0   6  34 3016.19 415.467  12
   0  -6 -34 3583.50 411.435   1
   0  -6  34 4149.10 473.109  12
   0  -6  34 4223.07 456.156   7
   0   6  35 1762.71 355.248  12
   0  -6  35 1003.40 260.812  12
   0   6 -35 1136.49 264.825   1
   0  -6 -35 928.164 237.656   1
   0  -6  35 1479.16 323.778   7
   0  -6  36 2397.92 381.137   7
   0   6 -36 2556.34 360.465   1
   0  -6  36 3435.05 446.407  12
   0   6  36 2681.32 410.942  12
   0  -6 -36 2971.22 394.135   1
   0   6 -37 821.172 253.157   1
   0  -6 -37 458.326 220.810   1
   0  -6  37 726.704 269.228   7
   0   6  37 700.897 268.520  12
   0   6 -38 1755.96 321.214   1
   0  -7   0 18.1293 63.2146   6
   0   7   0 75.2951 61.9118   8
   0  -7   0 10.6234 30.8142  11
   0   7   0-46.7872 76.6538  10
   0   7  -1 6292.26 252.979   8
   0   7   1 5678.94 234.316   8
   0  -7   1 5685.15 252.062   6
   0   7  -1 5792.15 251.050  10
   0  -7   1 5756.24 177.571  11
   0   7   1 5652.22 249.601  10
   0  -7  -1 6000.21 256.554   6
   0   7   2 63996.3 1295.05   8
   0  -7   2 65778.1 1334.37   6
   0  -7  -2 65275.1 1335.79   6
   0   7   2 69522.3 1192.36  11
   0  -7  -2 69892.6 1219.44   4
   0   7  -2 69196.4 1345.20  10
   0   7   2 70652.5 1343.52  10
   0   7  -2 64245.8 1331.19   8
   0  -7   2 60235.2 1205.21  11
   0   7   3 6817.98 256.246   8
   0  -7   3 6825.27 288.075   7
   0   7   3 7383.00 203.341  11
   0   7  -3 7699.08 303.744   8
   0  -7   3 7467.73 293.168   6
   0   7   3 7147.66 286.981  10
   0  -7  -3 6795.44 210.629   4
   0   7  -3 6107.69 272.659  10
   0  -7  -3 6626.73 283.484   6
   0   7  -4 6317.58 279.166  10
   0  -7   4 6169.79 272.472   6
   0  -7  -4 6295.20 199.208   4
   0  -7   4 6234.58 275.296   7
   0   7   4 6057.20 269.515  10
   0   7   4 6568.97 245.188   8
   0  -7  -4 6272.52 274.593   6
   0   7  -4 6405.08 285.393   8
   0   7   5 1383.22 115.937   8
   0  -7  -5 1469.51 138.481   6
   0  -7   5 1608.69 146.854   7
   0   7  -5 1270.81 134.394  10
   0   7  -5 1644.67 117.387  12
   0  -7  -5 1453.46 90.4314   4
   0  -7  -6 2757.84 185.612   6
   0   7   6 2586.03 154.379   8
   0  -7   6 3066.48 198.679   7
   0   7   6 3026.43 131.630   4
   0   7  -6 3066.01 202.312  10
   0   7   7 3629.46 154.480   4
   0   7   7 3699.85 184.164   8
   0  -7   7 3507.70 221.895   7
   0   7  -7 3737.34 222.665  10
   0  -7  -7 3736.54 159.713   9
   0  -7  -7 3761.65 221.982   6
   0   7  -8 320.941 107.003  10
   0  -7  -8 197.416 85.5089   6
   0  -7   8 547.306 120.591   7
   0  -7  -8 408.469 58.4283   9
   0   7   8 371.407 56.7574   4
   0   7   8 359.580 76.7283   8
   0   7   9 17766.2 446.730   4
   0   7   9 17413.8 478.741   8
   0  -7   9 17805.2 560.895   7
   0  -7  -9 17468.8 545.724   6
   0   7  -9 17440.5 561.490  10
   0  -7  -9 18606.1 419.777   9
   0  -7 -10 940.948 132.600   6
   0   7 -10 937.013 147.516  10
   0  -7 -10 798.023 72.1131   9
   0  -7  10 708.516 136.046   7
   0   7  10 821.361 98.5461   8
   0   7 -11 115.745 97.5795  10
   0  -7 -11 109.196 86.0390   6
   0  -7  11 50.0687 94.8512   7
   0  -7  11 215.666 96.2169  12
   0   7  11 13.9068 62.6337   8
   0   7  11 98.7721 63.2250   5
   0   7  12 954.939 111.903   8
   0   7  12 1010.15 114.986   5
   0  -7  12 1204.28 160.894   7
   0  -7 -12 1167.10 156.103   6
   0   7 -12 1189.50 168.660  10
   0  -7  12 1314.15 154.060  12
   0   7  13-18.6249 72.1209   5
   0  -7  13 64.1250 88.4464  12
   0   7  13 77.1310 67.5400   8
   0  -7 -13 33.2237 96.6952   6
   0   7 -13-66.9332 133.496  10
   0  -7  13 93.3151 101.355   7
   0   7  14 11305.4 406.993   8
   0   7  14 11522.7 410.509   5
   0  -7 -14 11613.0 472.523   6
   0   7 -14 11994.3 502.614  10
   0  -7  14 11871.8 470.553  12
   0  -7  14 12468.3 503.737   7
   0  -7  15 5595.10 344.979   7
   0  -7  15 5590.09 329.021  12
   0  -7 -15 5495.88 328.665   6
   0   7 -15 5995.62 357.154  10
   0   7  15 5514.58 278.057   8
   0   7  15 5489.77 277.277   5
   0  -7  16 10654.3 481.751  12
   0   7  16 11062.2 418.911   5
   0   7 -16 11177.9 514.300  10
   0  -7  16 11713.6 518.131   7
   0   7 -16 12245.7 487.543   1
   0   7  16 11948.3 429.874   8
   0  -7 -16 11571.4 495.448   6
   0  -7  17 24924.8 793.036  12
   0  -7 -17 24237.7 762.585   6
   0   7  17 25469.5 696.831   8
   0  -7  17 26450.8 821.167   7
   0   7  17 24675.6 687.323   5
   0   7 -17 26064.2 833.378  10
   0   7 -17 26479.2 775.011   1
   0  -7  18 13625.9 586.060   7
   0   7  18 13658.8 488.569   8
   0   7  18 14044.1 492.312   5
   0  -7  18 12853.0 559.760  12
   0   7 -18 12805.9 534.851   1
   0   7 -18 13440.8 594.279  10
   0   7  19 19888.5 634.086   8
   0  -7  19 20368.6 746.036  12
   0  -7  19 21145.8 760.874   7
   0   7 -19 19951.6 757.706  10
   0   7  19 20674.8 639.018   5
   0   7 -19 19044.0 699.152   1
   0   7  20 43259.3 1089.11   8
   0   7 -20 42400.6 1161.25   1
   0   7 -20 44349.5 1257.18  10
   0   7  20 43488.0 1083.13   5
   0  -7  20 43936.9 1237.87   7
   0  -7 -20 43094.1 1237.77   1
   0  -7  20 45926.6 1240.56  12
   0   7  21 19104.4 652.448   8
   0  -7  21 18728.1 751.416  12
   0   7  21 19665.8 648.325   5
   0  -7  21 18291.7 764.042   7
   0   7 -21 19343.8 728.789   1
   0  -7 -21 18803.4 772.260   1
   0   7  22 20920.9 688.191   8
   0   7 -22 19658.5 745.080   1
   0   7  22 20065.7 672.719   5
   0  -7  22 20895.9 808.533   7
   0  -7  22 19038.0 779.906  12
   0  -7 -22 21790.7 826.008   1
   0  -7  23 4493.66 383.718   7
   0   7 -23 4062.12 339.994   1
   0   7  23 4068.86 289.898   5
   0   7  23 4139.02 299.549   8
   0  -7  23 4271.69 371.963  12
   0  -7 -23 3963.29 359.000   1
   0   7  24 980.348 170.582   8
   0   7  24 1158.53 171.198   5
   0  -7  24 1052.85 228.406   7
   0  -7 -24 943.867 192.317   1
   0  -7  24 1081.18 223.069  12
   0   7 -24 842.022 184.104   1
   0  -7  25 409.416 206.455   7
   0   7 -25 83.3992 175.032   1
   0  -7  25 435.602 207.572  12
   0  -7 -25 760.560 225.249   1
   0   7  25 551.957 172.456   8
   0   7  25 235.916 145.128   5
   0  -7  26 17501.6 809.889   7
   0  -7  26 18418.2 821.158  12
   0   7  26 18614.6 685.665   5
   0   7  26 18785.8 700.669   8
   0  -7 -26 18103.4 824.304   1
   0   7 -26 18260.2 755.641   1
   0   7  27 13985.6 608.578   8
   0   7 -27 14056.8 665.498   1
   0  -7 -27 14957.3 747.389   1
   0  -7  27 14292.7 729.129   7
   0  -7  27 14004.8 718.732  12
   0   7  27 14018.1 596.834   5
   0  -7 -28 3534.60 379.434   1
   0  -7  28 4574.72 431.815   7
   0   7  28 4266.91 329.571   5
   0   7  28 4187.73 336.002   8
   0  -7  28 3480.30 391.125  12
   0   7 -28 4005.23 363.310   1
   0   7  29 2200.95 259.415   8
   0   7  29 2367.51 253.388   5
   0  -7  29 1827.86 312.722  12
   0  -7 -29 3003.56 356.064   1
   0   7 -29 2320.04 292.363   1
   0  -7  29 1804.46 314.463   7
   0   7  30 327.775 178.020   8
   0   7  30 484.015 160.729   5
   0  -7  30 296.013 199.253   7
   0  -7 -30-102.127 183.670   1
   0   7 -30 479.461 189.724   1
   0  -7  30 242.922 193.189  12
   0  -7  31 3343.59 395.085   7
   0  -7  31 4384.31 445.474  12
   0   7  31 4306.29 359.007   8
   0   7 -31 4156.62 403.704   1
   0  -7 -31 4360.61 434.690   1
   0  -7  32 63.3554 199.224   7
   0   7 -32 676.930 217.640   1
   0   7  32 76.3626 138.708   8
   0  -7 -32 291.121 203.741   1
   0  -7  32 462.365 237.940  12
   0   7 -33 642.307 219.957   1
   0  -7 -33 130.205 171.800   1
   0   7  33 751.662 293.224  12
   0  -7  33 543.984 237.549   7
   0  -7  33 460.076 211.930  12
   0   7  34 47.4164 223.561  12
   0  -7  34 3.41087 201.202   7
   0  -7  34 420.515 249.240  12
   0  -7 -34 266.440 149.400   1
   0   7 -34 46.2093 156.970   1
   0   7  35-115.682 246.888  12
   0   7 -35 330.231 200.779   1
   0  -7  35-103.606 210.439   7
   0  -7  35 63.3695 178.728  12
   0  -7 -35 22.6852 162.810   6
   0  -7 -35 240.043 210.848   1
   0  -7 -36 224.708 212.225   1
   0  -7  36 123.232 197.486   7
   0  -7  36 52.8018 217.684  12
   0   7  36-363.061 267.412  12
   0  -7 -36 267.632 199.278   6
   0   7 -36 145.787 179.925   1
   0  -7 -37 1622.80 299.239   6
   0   7 -37 2126.82 340.034   1
   0  -7 -38 6211.49 524.275   6
   0  -7 -39 1120.37 294.720   6
   0  -8   0 11495.6 403.950   6
   0   8   0 11008.6 389.859  10
   0   8   0 12449.7 401.693   8
   0  -8   0 12058.7 299.853  11
   0  -8   1 3576.03 144.025  11
   0  -8   1 3443.07 209.739   6
   0   8   1 3469.88 196.450   8
   0  -8  -1 3651.57 216.819   6
   0   8  -1 3379.68 202.134   8
   0   8  -1 3679.25 213.851  10
   0   8   1 2997.13 199.326  10
   0   8  -2 3774.58 226.479  10
   0  -8   2 4273.41 166.069  11
   0  -8   2 4346.88 236.089   6
   0  -8  -2 3865.80 228.304   6
   0   8  -2 4551.94 238.205   8
   0   8   2 4345.15 151.483  11
   0  -8  -2 4148.31 166.229   4
   0   8   2 3673.29 215.853  10
   0   8   2 4350.30 215.920   8
   0  -8  -3 3858.40 225.273   6
   0   8   3 4027.62 147.046  11
   0  -8   3 3769.31 221.769   6
   0  -8   3 3827.03 164.450  11
   0   8   3 3771.23 200.326   8
   0   8   3 3752.67 216.454  10
   0   8  -3 3748.66 225.741   8
   0   8  -3 3722.57 220.714  10
   0  -8  -3 3656.12 155.147   4
   0   8   4 4437.45 240.410  10
   0  -8   4 4010.47 234.255   7
   0   8  -4 4216.24 238.288   8
   0  -8  -4 3956.78 162.243   4
   0   8   4 4235.99 157.891  11
   0  -8  -4 4234.94 238.451   6
   0  -8   4 4420.71 237.465   6
   0   8  -4 4304.64 239.016  10
   0   8   4 4203.69 209.751   8
   0  -8   5 18493.8 541.804   7
   0  -8  -5 17787.8 417.116   4
   0  -8   5 17201.2 528.770   6
   0   8   5 17904.3 484.707   8
   0   8  -5 17178.6 537.083  10
   0  -8  -5 17516.2 535.535   6
   0   8   5 16671.2 520.753  10
   0   8   6 21761.2 567.034   8
   0  -8   6 22142.3 626.213   7
   0  -8  -6 22011.9 630.901   6
   0   8  -6 24111.7 650.223  10
   0   8   7 8190.06 301.674   8
   0  -8   7 7862.61 347.866   7
   0  -8  -7 8023.67 347.731   6
   0   8  -7 8677.49 360.181  10
   0   8   7 8202.02 251.742   4
   0  -8   8 527.074 109.576   7
   0   8  -8 442.054 109.235  10
   0   8   8 520.984 84.6394   8
   0   8   8 630.228 72.6003   4
   0  -8  -8 632.331 124.547   6
   0  -8  -8 570.609 71.8266   9
   0   8   9 54100.7 1080.00   4
   0   8  -9 55182.9 1255.04  10
   0   8   9 53867.4 1142.45   8
   0  -8   9 53854.4 1245.96   7
   0  -8  -9 54379.7 1241.44   6
   0  -8  -9 58598.7 1069.79   9
   0  -8 -10 18466.0 443.501   9
   0   8 -10 19616.1 619.793  10
   0  -8 -10 18227.5 590.899   6
   0   8  10 18450.2 517.520   8
   0  -8  10 19231.0 612.022   7
   0  -8 -11 21568.8 496.763   9
   0   8  11 22795.5 593.698   8
   0  -8  11 22226.3 687.601   7
   0   8 -11 22260.2 697.248  10
   0  -8 -11 21538.6 666.902   6
   0   8  12 4027.51 218.136   8
   0  -8 -12 4123.05 272.679   6
   0   8 -12 3874.35 271.889  10
   0  -8  12 3977.05 276.194   7
   0   8 -13 652.270 145.740  10
   0   8  13 525.155 92.4128   8
   0  -8 -13 401.327 103.219   6
   0  -8  13 492.963 132.157   7
   0   8  14 5640.38 280.797   5
   0  -8  14 5279.20 310.205  12
   0  -8  14 5576.96 346.995   7
   0   8 -14 5808.60 350.004  10
   0  -8 -14 5742.71 326.298   6
   0   8  14 5359.66 272.586   8
   0   8 -15 56542.9 1394.88  10
   0  -8 -15 56390.2 1346.06   6
   0  -8  15 57111.8 1387.68   7
   0  -8  15 56278.9 1328.07  12
   0   8  15 55694.2 1232.26   8
   0   8  15 56420.3 1241.53   5
   0  -8  16 112.097 133.503   7
   0   8  16 135.644 85.4802   8
   0   8 -16 92.3633 135.689  10
   0  -8 -16 77.2596 129.745   6
   0   8  16 140.479 86.8943   5
   0  -8  16 274.524 142.471  12
   0  -8  17 10005.3 490.706   7
   0  -8  17 9127.73 447.225  12
   0   8  17 8966.75 388.305   8
   0   8 -17 8797.64 481.656  10
   0   8  17 9056.89 383.108   5
   0  -8 -17 9374.02 449.429   6
   0  -8  18 97.8234 111.923  12
   0  -8 -18-82.6658 127.073   6
   0   8 -18-240.321 183.373  10
   0  -8  18 173.508 147.482   7
   0   8  18-31.4143 91.1568   5
   0   8  18-14.3997 91.7306   8
   0  -8  19 2642.82 265.034  12
   0   8  19 2418.21 210.078   5
   0  -8 -19 2690.74 253.609   6
   0   8 -19 2810.33 280.582  10
   0  -8  19 2397.01 266.460   7
   0   8  19 2793.43 221.709   8
   0  -8  20 895.036 208.107   7
   0   8 -20 1050.13 211.138  10
   0   8  20 733.700 144.907   8
   0  -8  20 849.229 182.110  12
   0  -8 -20 673.994 167.705   6
   0   8  20 900.506 150.300   5
   0   8  21-13.3305 94.5325   5
   0  -8  21 212.240 148.576  12
   0   8  21 240.598 118.835   8
   0  -8 -21 550.497 202.392   1
   0   8 -21 62.5069 162.558  10
   0  -8 -21 39.5533 140.807   6
   0  -8  21 203.784 175.241   7
   0  -8  22 5838.69 415.584  12
   0  -8 -22 5850.79 396.961   6
   0  -8  22 5850.81 436.602   7
   0   8  22 5689.12 339.521   8
   0   8 -22 5275.78 424.974  10
   0  -8 -22 6321.42 437.041   1
   0   8 -22 5943.08 391.654   1
   0   8  22 6110.55 345.951   5
   0  -8  23 1134.07 232.816   7
   0   8 -23 1320.15 225.987   1
   0  -8 -23 1001.42 209.877   6
   0   8  23 1266.36 201.877   8
   0   8  23 1433.03 194.268   5
   0  -8 -23 755.501 194.954   1
   0  -8  23 1222.40 226.467  12
   0   8  24 10874.7 491.397   8
   0   8 -24 10901.2 549.539   1
   0   8  24 11223.6 491.487   5
   0  -8 -24 9642.22 588.926   1
   0  -8  24 9381.02 553.059  12
   0  -8  24 11016.8 601.650   7
   0  -8 -24 9870.97 537.051   6
   0  -8  25 2966.10 328.576  12
   0  -8 -25 2797.12 303.482   6
   0   8  25 3337.74 283.445   8
   0   8  25 3477.56 282.207   5
   0  -8  25 2679.68 327.637   7
   0   8 -25 4070.04 349.607   1
   0  -8 -25 3544.55 365.488   1
   0   8  26 4802.76 333.446   5
   0   8 -26 5147.38 398.626   1
   0  -8 -26 4894.55 429.702   1
   0  -8  26 4752.95 422.199   7
   0  -8 -26 4812.11 399.581   6
   0   8  26 4975.72 353.600   8
   0  -8  26 3864.96 387.482  12
   0   8 -27 14477.8 677.984   1
   0  -8  27 13881.1 718.742  12
   0   8  27 13666.2 586.568   5
   0  -8 -27 13102.8 661.895   6
   0   8  27 13717.0 604.381   8
   0  -8 -27 14691.8 745.506   1
   0  -8  27 14880.5 750.003   7
   0   8  28 2102.83 247.749   5
   0  -8 -28 2088.84 301.469   6
   0  -8  28 2473.04 349.698  12
   0   8 -28 2778.50 327.590   1
   0   8  28 1682.43 237.273   8
   0  -8  28 2037.00 336.102   7
   0  -8 -28 1585.80 295.638   1
   0  -8 -29 4861.03 415.037   6
   0   8 -29 5245.92 423.551   1
   0   8  29 4828.43 365.609   8
   0  -8  29 4753.12 434.243  12
   0  -8  29 5089.57 458.570   7
   0   8  29 4809.11 351.792   5
   0  -8 -29 4937.58 442.910   1
   0  -8 -30 2028.02 306.885   6
   0  -8  30 1348.57 295.621   7
   0  -8  30 1836.55 314.168  12
   0   8  30 1235.46 224.495   8
   0  -8 -30 1636.32 305.721   1
   0   8 -30 2439.06 332.368   1
   0  -8 -31 19695.2 938.623   1
   0  -8 -31 19957.0 876.171   6
   0   8 -31 18910.6 858.103   1
   0  -8  31 19485.7 930.395   7
   0  -8  31 21718.1 969.329  12
   0   8 -32 1514.84 296.799   1
   0  -8 -32 1510.97 311.764   1
   0  -8  32 1723.65 330.569   7
   0  -8  32 1527.24 315.958  12
   0  -8 -32 1680.43 294.954   6
   0  -8 -33 8179.83 606.556   1
   0  -8  33 8657.18 639.327   7
   0  -8 -33 8529.06 580.116   6
   0  -8  33 7915.48 611.936  12
   0   8 -33 8929.19 598.109   1
   0  -8  34 8582.23 647.234  12
   0   8 -34 7861.11 573.334   1
   0  -8 -34 8158.04 613.840   1
   0   8  34 9703.41 727.709  12
   0  -8  34 8928.91 652.685   7
   0  -8 -34 7904.20 568.525   6
   0  -8 -35 117.648 205.285   6
   0  -8  35-120.453 232.304  12
   0  -8 -35 356.964 233.461   1
   0   8 -35 670.346 241.087   1
   0  -8  35-244.684 251.374   7
   0   8  35 490.959 275.099  12
   0   8  36 47.7049 253.368  12
   0  -8  36 67.8271 204.398   7
   0  -8 -36 158.135 183.611   1
   0  -8 -36 105.043 179.506   6
   0  -8  36-17.1306 221.298  12
   0  -8 -37 515.364 220.075   6
   0  -8 -38 534.267 231.050   6
   0   9   0 35.1984 79.1824  10
   0  -9   0-7.77559 85.4159   6
   0  -9   0 61.6862 36.7149  11
   0   9   0 74.0697 82.7654   8
   0  -9  -1 18368.6 561.242   6
   0  -9   1 18043.3 557.343   6
   0  -9   1 18965.5 435.897  11
   0   9  -1 18061.8 553.024  10
   0   9  -1 18406.2 551.508   8
   0   9   1 18598.3 559.658  10
   0   9   1 17415.3 529.255   8
   0   9   2 72.3866 37.6809  11
   0  -9   2 152.930 89.5519   6
   0  -9  -2 192.274 55.5134   4
   0   9   2 122.344 71.6389   8
   0   9  -2 192.803 91.7419   8
   0   9  -2-127.439 92.2974  10
   0  -9   2 49.9740 37.8369  11
   0   9   2 105.114 96.6103  10
   0  -9  -2 176.832 98.2359   6
   0  -9  -3 69601.3 1293.69   4
   0   9  -3 72015.6 1465.92  10
   0   9  -3 69823.2 1467.95   8
   0  -9   3 71120.3 1459.71   6
   0   9   3 68445.3 1261.16  11
   0  -9  -3 67341.0 1452.44   6
   0   9   3 67145.9 1397.70   8
   0   9   3 64905.5 1427.80  10
   0  -9   3 72230.8 1312.77  11
   0  -9   4 9200.08 381.069   6
   0  -9  -4 9059.34 382.023   6
   0   9  -4 9940.47 400.060   8
   0   9   4 10336.1 275.117  11
   0  -9   4 9594.61 386.781   7
   0   9  -4 9801.83 391.605  10
   0  -9  -4 9654.31 288.844   4
   0   9   4 10075.2 357.970   8
   0   9   4 9384.95 383.078  10
   0   9  -5 5288.55 290.743   8
   0   9   5 5758.76 196.910  11
   0  -9  -5 5377.12 202.263   4
   0   9   5 5370.38 282.009  10
   0   9   5 5243.15 250.625   8
   0   9  -5 5511.65 286.599  10
   0  -9   5 5322.00 280.023   6
   0  -9  -5 5265.34 284.516   6
   0  -9   5 5295.90 283.518   7
   0  -9   6 5729.06 298.884   7
   0  -9  -6 5627.28 297.800   6
   0   9   6 5682.99 257.918   8
   0   9  -6 5238.26 290.427  10
   0   9   6 5510.05 287.189  10
   0  -9  -7 14291.4 505.192   6
   0   9  -7 15100.6 519.513  10
   0  -9   7 14472.8 507.876   7
   0   9   7 13828.6 435.263   8
   0  -9   8 3606.83 245.182   7
   0   9   8 3345.13 157.915   4
   0  -9  -8 3134.58 166.246   9
   0   9  -8 3046.58 233.747  10
   0   9   8 3191.02 198.836   8
   0  -9  -8 3254.02 236.310   6
   0   9   9 5169.88 202.654   4
   0  -9  -9 5487.25 213.464   9
   0  -9  -9 5450.96 303.222   6
   0   9  -9 5038.89 306.908  10
   0   9   9 4544.45 241.525   8
   0  -9   9 5333.71 307.955   7
   0   9 -10 862.438 151.671  10
   0  -9  10 1007.61 158.881   7
   0   9  10 1125.94 120.710   8
   0  -9 -10 1033.62 94.9417   9
   0  -9 -10 1256.18 171.674   6
   0   9 -11 4809.34 305.718  10
   0  -9 -11 4787.42 296.997   6
   0  -9  11 4786.32 313.331   7
   0   9  11 4523.28 237.227   8
   0  -9 -11 4246.90 180.936   9
   0  -9  12 17687.8 625.617   7
   0  -9 -12 16606.0 425.196   9
   0   9 -12 18696.0 640.037  10
   0   9  12 17781.2 529.514   8
   0  -9 -12 18385.5 620.845   6
   0  -9  13-27.9695 122.975   7
   0  -9 -13 66.7724 107.686   6
   0   9 -13 163.705 118.675  10
   0   9  13 130.463 74.7253   8
   0  -9 -14 3234.80 264.709   6
   0   9 -14 3772.43 290.446  10
   0   9  14 2959.23 205.982   8
   0  -9  14 3370.03 280.700   7
   0   9  15 4845.39 266.838   8
   0  -9  15 5181.99 354.122   7
   0  -9 -15 4513.65 314.341   6
   0   9 -15 4735.71 330.639  10
   0  -9  16 25073.3 827.718   7
   0  -9 -16 24273.2 790.780   6
   0   9 -16 23877.1 822.093  10
   0   9  16 24694.7 698.874   8
   0   9  17 10165.4 413.779   5
   0  -9 -17 9440.77 472.494   6
   0  -9  17 9732.05 504.844   7
   0   9 -17 9835.05 506.818  10
   0   9  17 9980.40 410.675   8
   0  -9  18-30.4705 153.100   7
   0   9  18-16.4256 88.7248   5
   0   9  18 46.7420 85.3586   8
   0  -9 -18 51.6286 112.355   6
   0  -9  18 236.218 132.294  12
   0   9 -18-184.255 159.577  10
   0   9 -19 10021.4 533.514  10
   0  -9  19 9410.35 489.714  12
   0   9  19 9899.41 425.732   5
   0   9  19 10018.8 427.185   8
   0  -9  19 9949.57 527.764   7
   0  -9 -19 9762.07 499.469   6
   0   9 -20 13110.4 642.552  10
   0  -9  20 12369.6 580.914  12
   0   9  20 13052.8 507.229   5
   0  -9  20 13499.9 632.012   7
   0  -9 -20 12302.2 584.054   6
   0   9  20 13724.1 519.134   8
   0   9 -21 22712.2 878.056  10
   0  -9  21 21893.6 810.686  12
   0   9  21 22092.8 708.080   5
   0   9  21 22063.7 716.594   8
   0  -9 -21 22449.8 811.085   6
   0  -9  21 22612.5 860.318   7
   0   9 -22 1970.46 295.109  10
   0  -9  22 2180.18 272.476  12
   0   9  22 2686.78 245.637   5
   0   9  22 2254.72 223.424   8
   0  -9 -22 2347.91 268.837   6
   0  -9 -22 2692.54 316.059   1
   0  -9  22 2344.71 320.186   7
   0  -9 -23 233.285 141.356   6
   0   9  23 390.533 123.970   8
   0  -9 -23 193.684 164.063   1
   0  -9  23 339.306 193.752   7
   0  -9  23 301.553 163.704  12
   0   9 -23 278.328 177.141  10
   0   9  23 592.921 143.514   5
   0   9  24-149.802 118.632   5
   0  -9 -24 122.405 144.714   6
   0   9  24 149.888 108.680   8
   0  -9  24 392.354 170.810  12
   0  -9  24 31.7533 178.685   7
   0  -9 -24-171.952 188.293   1
   0   9  25 356.583 146.286   8
   0  -9  25 433.144 189.882  12
   0  -9 -25 348.622 156.217   6
   0  -9  25 753.685 242.441   7
   0  -9 -25 318.273 176.193   1
   0   9  25 260.258 106.691   5
   0  -9 -26 5539.62 461.623   1
   0  -9  26 6700.98 497.482   7
   0   9  26 5655.12 366.886   5
   0  -9 -26 5668.36 434.115   6
   0   9  26 6107.00 385.539   8
   0  -9  26 5303.85 434.739  12
   0  -9  27 8465.42 560.229  12
   0  -9 -27 8851.04 550.276   6
   0  -9  27 10864.7 649.267   7
   0   9  27 9799.39 486.302   5
   0   9  27 10000.8 505.069   8
   0  -9 -27 9982.21 630.104   1
   0  -9  28 9095.26 607.373   7
   0  -9  28 7470.62 541.381  12
   0  -9 -28 8184.07 579.685   1
   0   9  28 8680.00 478.763   8
   0   9  28 9086.49 469.558   5
   0  -9 -28 7814.15 519.257   6
   0  -9  29 547.863 221.879  12
   0  -9 -29 323.732 182.695   1
   0  -9 -29-43.4885 149.154   6
   0   9  29 151.645 152.030   8
   0  -9  29 48.1056 209.968   7
   0  -9  30 526.170 247.643  12
   0  -9 -30 463.055 194.525   6
   0  -9  30-113.893 189.449   7
   0  -9 -30 223.092 179.212   1
   0  -9 -31 2.00039 198.194   1
   0  -9  31-44.2763 217.934   7
   0  -9 -31-82.6256 180.636   6
   0  -9  31-9.33232 190.915  12
   0  -9 -32 732.863 224.268   6
   0  -9  32 279.116 196.033  12
   0  -9  32 700.396 262.745   7
   0  -9 -32 429.587 199.422   1
   0  -9 -33 2697.95 356.042   1
   0  -9  33 3106.77 412.312   7
   0  -9  33 2962.40 392.542  12
   0  -9 -33 2946.74 365.871   6
   0  -9 -34 1541.74 276.908   6
   0  -9  34 1845.37 339.326  12
   0  -9 -34 1708.03 320.045   1
   0  -9  34 1226.78 320.990   7
   0   9  35 86.4960 260.871  12
   0  -9  35-246.345 240.231   7
   0  -9 -35 153.427 179.668   1
   0  -9 -35 305.738 207.599   6
   0  -9 -36 1356.91 294.872   6
   0   9  36 1511.51 339.778  12
   0  -9 -37 6596.48 539.041   6
   0 -10   0 19050.2 437.055  11
   0 -10   0 17672.2 573.724   6
   0  10   0 17968.1 557.992   8
   0  10   0 17394.5 570.127  10
   0 -10   1 3540.91 237.387   6
   0  10  -1 3350.92 232.290  10
   0  10   1 3372.34 231.407  10
   0  10   1 3207.60 212.898   8
   0 -10   1 3400.17 151.094  11
   0 -10  -1 3123.02 232.110   6
   0  10  -1 3146.56 224.130   8
   0  10   2 4447.73 264.202  10
   0 -10  -2 4650.03 195.683   4
   0 -10  -2 4796.95 277.412   6
   0  10  -2 4613.21 270.307   8
   0  10  -2 4732.81 275.254  10
   0 -10   2 4564.55 188.497  11
   0 -10   2 4732.88 276.058   6
   0  10   2 4938.77 260.293   8
   0  10  -3 1103.17 154.148  10
   0  10   3 842.389 76.9665  11
   0 -10  -3 1133.53 94.8241   4
   0 -10   3 1119.77 155.843   6
   0 -10  -3 1117.52 156.806   6
   0  10  -3 1057.57 142.596   8
   0  10   3 861.715 117.267   8
   0  10   3 1131.00 150.651  10
   0 -10  -4 6856.06 243.633   4
   0  10  -4 6821.82 346.494   8
   0 -10  -4 7817.16 358.893   6
   0  10  -4 7011.47 353.393  10
   0  10   4 7316.36 228.986  11
   0  10   4 7266.07 347.058  10
   0 -10   4 7244.54 347.405   6
   0  10   4 7467.10 314.302   8
   0 -10   4 7723.13 361.314   7
   0 -10  -5 4614.04 279.851   6
   0 -10   5 4293.23 270.567   6
   0  10   5 4342.32 173.296  11
   0 -10  -5 4035.41 180.799   4
   0  10  -5 3796.32 262.397   8
   0  10   5 4389.95 239.540   8
   0  10   5 4380.77 263.470  10
   0  10  -5 4134.49 264.490  10
   0 -10   5 4696.07 284.237   7
   0  10   6-115.350 123.547  10
   0  10   6 9.66144 69.4265   8
   0  10  -6 84.3200 98.3292  10
   0  10   6 21.1814 45.6446  11
   0 -10  -6 2.08795 97.7825   6
   0 -10   6-53.5955 104.492   7
   0 -10  -6-25.5550 52.4835   4
   0 -10   7 16287.1 568.951   7
   0  10   7 16579.7 507.182   8
   0  10  -7 16776.5 582.590  10
   0 -10  -7 17614.2 585.174   6
   0  10   7 16258.0 561.032  10
   0 -10   8 42118.5 1057.16   7
   0  10  -8 42651.1 1068.40  10
   0 -10  -8 41098.6 1047.40   6
   0  10   8 41720.6 959.959   8
   0  10  -9 14206.4 545.575  10
   0  10   9 13584.0 458.109   8
   0 -10   9 13994.5 540.394   7
   0 -10  -9 14482.3 540.404   6
   0 -10  -9 15349.8 422.129   9
   0 -10 -10 1019.15 99.2798   9
   0  10  10 641.574 105.006   8
   0 -10  10 717.336 147.330   7
   0 -10 -10 823.123 146.905   6
   0  10 -10 770.984 147.369  10
   0 -10 -11 3350.19 168.290   9
   0 -10  11 3495.06 276.806   7
   0 -10 -11 3708.45 266.509   6
   0  10  11 3147.17 207.925   8
   0  10 -11 3455.42 272.354  10
   0 -10 -12 4655.25 309.566   6
   0  10  12 4583.76 251.660   8
   0 -10 -12 4186.50 187.694   9
   0  10 -12 4436.82 310.996  10
   0 -10  12 4356.07 309.015   7
   0  10 -13 9754.20 470.790  10
   0  10  13 9635.68 382.664   8
   0 -10 -13 9475.48 297.835   9
   0 -10  13 9777.51 473.291   7
   0 -10 -13 9202.02 444.709   6
   0  10 -14 14736.2 619.471  10
   0  10  14 15179.1 503.704   8
   0 -10  14 14568.8 598.158   7
   0 -10 -14 14550.4 580.496   6
   0  10 -15 7235.29 429.288  10
   0 -10  15 7369.35 429.238   7
   0  10  15 7644.25 345.557   8
   0 -10 -15 7212.12 406.002   6
   0 -10 -16 24831.6 833.104   6
   0  10 -16 25278.1 870.745  10
   0  10  16 27045.6 745.641   8
   0 -10  16 27641.4 888.784   7
   0  10 -17 9556.42 510.219  10
   0 -10 -17 9419.59 486.911   6
   0  10  17 9708.21 409.862   8
   0 -10  17 9633.80 509.143   7
   0 -10  18 3599.82 336.876   7
   0  10  18 4013.49 260.728   8
   0 -10 -18 3998.87 322.799   6
   0  10 -18 4047.84 344.975  10
   0 -10  19 24607.3 882.871   7
   0  10 -19 25128.6 907.313  10
   0 -10 -19 23787.2 834.615   6
   0  10  19 23942.1 735.264   8
   0  10  20 2503.64 221.766   8
   0  10 -20 2078.90 292.105  10
   0 -10 -20 2254.53 264.955   6
   0 -10  20 2355.83 281.461   7
   0  10 -21-122.663 162.090  10
   0 -10 -21 60.3655 135.573   6
   0 -10  21-325.819 169.818   7
   0  10  21 43.1164 93.5133   5
   0  10  21-131.441 110.077   8
   0 -10  22 1537.44 254.759   7
   0  10  22 1408.21 184.551   5
   0  10 -22 1549.12 255.852  10
   0  10  22 1465.06 185.702   8
   0 -10 -22 1697.13 251.363   6
   0  10 -23 2886.69 327.753  10
   0 -10 -23 2992.08 306.611   6
   0  10  23 3001.44 263.479   8
   0 -10  23 3150.78 345.160   7
   0  10  23 3210.27 260.358   5
   0  10 -24 3105.95 361.057  10
   0  10  24 3047.55 261.668   8
   0  10  24 2729.77 252.983   5
   0 -10 -24 2552.76 338.679   1
   0 -10  24 2205.76 306.431   7
   0 -10 -24 2497.42 295.109   6
   0  10  25 815.083 163.252   8
   0 -10 -25 1003.30 217.248   6
   0  10  25 838.867 170.795   5
   0 -10  25 689.505 242.206   7
   0 -10 -25 641.821 198.689   1
   0 -10 -26 5450.04 426.059   6
   0  10  26 5640.86 366.224   5
   0 -10  26 6001.95 485.160   7
   0  10  26 6205.43 386.174   8
   0 -10 -26 5713.25 470.529   1
   0  10  27 2480.82 273.442   5
   0  10  27 2014.21 255.181   8
   0 -10  27 3165.48 391.851   7
   0 -10 -27 2691.33 354.309   1
   0 -10 -27 1738.98 287.047   6
   0 -10 -28 19844.0 855.009   6
   0 -10  28 19924.8 920.120   7
   0  10  28 19656.6 745.906   8
   0 -10 -28 20075.9 926.117   1
   0 -10 -29 6343.17 536.290   1
   0 -10  29 5854.24 521.289   7
   0 -10 -29 6086.33 479.143   6
   0 -10 -30 126.000 189.941   6
   0 -10  30-191.080 197.446   7
   0 -10 -30 65.0167 153.994   1
   0 -10 -31 1722.25 277.588   6
   0 -10  31 2155.01 360.623   7
   0 -10 -31 1285.24 281.676   1
   0 -10  32 5117.63 512.426   7
   0 -10 -32 5322.77 463.560   6
   0 -10 -32 5190.69 494.184   1
   0 -10  33 3903.67 455.252   7
   0 -10 -33 3603.12 397.403   6
   0 -10 -33 3192.02 403.960   1
   0 -10  34 90.3738 209.098   7
   0 -10 -34-22.9773 184.463   1
   0 -10 -34-77.9882 173.215   6
   0  10  35 133.488 251.085  12
   0 -10  35 460.831 256.859   7
   0 -10 -35-22.2350 172.155   1
   0 -10 -35 480.708 223.162   6
   0 -10 -36 2335.70 345.196   6
   0  10  36 1682.18 377.835  12
   0 -10 -37 141.302 192.674   6
   0 -11   0-21.2334 112.026   6
   0  11   0 1.36958 81.7447   8
   0 -11   0 26.4927 37.8766  11
   0  11   0-77.9300 113.146  10
   0 -11   1 6356.53 223.079  11
   0  11  -1 6022.34 319.957   8
   0  11   1 6133.52 314.253   8
   0 -11   1 5942.51 329.330   6
   0 -11  -1 5966.95 324.389   6
   0  11   1 5973.66 326.527  10
   0  11  -1 6467.15 335.798  10
   0 -11   2 40174.1 1032.62   6
   0  11  -2 40760.1 1036.16   8
   0 -11  -2 42068.4 1049.16   6
   0  11   2 43452.9 1014.01   8
   0  11  -2 40985.6 1035.40  10
   0 -11  -2 43123.1 878.927   4
   0  11   2 39094.6 1020.39  10
   0 -11  -3 10478.8 318.877   4
   0  11  -3 10254.8 432.328  10
   0  11   3 10622.3 408.989   8
   0 -11  -3 10887.5 448.844   6
   0  11   3 10625.9 433.297  10
   0  11   3 8671.91 274.550  11
   0 -11   3 10338.1 437.366   6
   0  11  -3 11284.6 453.575   8
   0  11   4 81025.1 1769.81  10
   0  11   4 82057.2 1717.92   8
   0  11  -4 85728.7 1813.75   8
   0 -11  -4 82659.8 1790.21   6
   0 -11  -4 86688.3 1584.42   4
   0 -11   4 84823.2 1784.28   7
   0 -11   4 84088.7 1792.46   6
   0  11   4 89632.4 1553.68  11
   0  11  -4 79900.2 1773.36  10
   0  11  -5 17104.8 591.917  10
   0  11   5 18806.6 437.941  11
   0 -11   5 17215.9 595.230   7
   0  11   5 17532.1 546.250   8
   0 -11  -5 17156.8 448.429   4
   0  11   5 16893.3 588.136  10
   0 -11  -5 17001.7 596.678   6
   0  11  -5 16298.7 600.974   8
   0 -11   5 17949.1 597.773   6
   0  11   6 20412.7 486.188  11
   0 -11  -6 20779.8 497.396   4
   0  11   6 19388.1 589.982   8
   0 -11   6 19939.4 654.852   6
   0  11  -6 20521.8 668.975  10
   0 -11  -6 20402.6 663.044   6
   0 -11   6 19787.8 655.121   7
   0  11   6 19228.8 644.932  10
   0  11   7 21171.4 513.275  11
   0  11   7 21727.3 686.655  10
   0 -11   7 22281.3 699.410   7
   0 -11  -7 21509.4 696.244   6
   0  11   7 20718.2 614.324   8
   0  11  -7 22152.1 706.174  10
   0 -11   8 6071.32 346.989   7
   0  11   8 5801.09 333.659  10
   0 -11  -8 5404.23 328.690   6
   0  11  -8 6154.48 347.781  10
   0  11   8 5618.11 282.572   8
   0  11   9 2212.99 178.701   8
   0  11  -9 2147.97 231.498  10
   0  11   9 1960.57 197.168  10
   0 -11  -9 2187.79 214.205   6
   0 -11  -9 2232.31 152.644   9
   0 -11   9 2194.12 220.250   7
   0 -11  10-16.9690 127.834   7
   0  11  10 117.813 77.5111   8
   0 -11 -10 42.5103 115.386   6
   0  11 -10-80.7326 129.607  10
   0 -11 -10-20.0642 55.2861   9
   0 -11 -11 11946.1 356.762   9
   0 -11  11 10091.6 479.235   7
   0 -11 -11 10118.3 476.469   6
   0  11 -11 11094.9 495.868  10
   0  11  11 10402.8 409.763   8
   0 -11 -12 2509.02 244.308   6
   0  11 -12 2066.59 230.088  10
   0 -11 -12 2376.81 145.656   9
   0 -11  12 2332.97 245.417   7
   0  11  12 2375.09 190.884   8
   0 -11  13 1035.63 182.663   7
   0  11  13 712.291 119.188   8
   0 -11 -13 1020.03 97.6799   9
   0 -11 -13 958.390 173.947   6
   0  11 -13 890.224 170.313  10
   0  11  14 1509.68 161.798   8
   0 -11 -14 1357.85 199.691   6
   0 -11  14 1459.27 212.162   7
   0 -11 -14 1490.31 115.346   9
   0  11 -14 1660.68 222.057  10
   0 -11 -15 716.986 163.748   6
   0  11  15 649.540 110.968   8
   0 -11  15 697.075 176.852   7
   0  11 -15 646.804 174.033  10
   0 -11  16 16778.1 679.428   7
   0  11 -16 16204.0 681.309  10
   0 -11 -16 15673.8 638.675   6
   0  11  16 15757.9 546.856   8
   0 -11 -17 473.733 154.605   6
   0 -11  17 1069.19 220.711   7
   0  11 -17 598.334 180.335  10
   0  11  17 495.401 119.068   8
   0 -11  18 625.050 193.582   7
   0 -11 -18 832.464 172.178   6
   0  11 -18 463.021 153.129  10
   0  11  18 674.232 138.895   8
   0  11 -19-158.065 177.379  10
   0 -11  19 241.904 165.532   7
   0 -11 -19 158.079 129.485   6
   0  11  19 189.852 97.7443   8
   0 -11  20 8748.98 522.462   7
   0 -11 -20 8109.45 483.530   6
   0  11 -20 8559.15 524.836  10
   0  11  20 8854.43 416.996   8
   0 -11  21 221.754 159.918   7
   0  11  21 458.238 127.792   8
   0  11 -21 179.409 161.833  10
   0 -11 -21 263.229 153.405   6
   0  11  22 2025.77 213.352   8
   0 -11  22 1857.56 269.979   7
   0  11 -22 1897.13 270.347  10
   0 -11 -22 2380.68 272.364   6
   0 -11 -23 79.7196 137.306   6
   0  11 -23 288.305 204.195  10
   0 -11  23-68.1973 161.588   7
   0  11  23 135.333 109.125   8
   0 -11 -24 97.8365 145.685   6
   0  11  24 307.875 118.702   8
   0 -11  24 431.701 219.378   7
   0  11 -24 10.9427 189.467  10
   0 -11 -25-131.432 170.625   1
   0 -11 -25 384.982 167.111   6
   0 -11  25 186.650 196.428   7
   0  11  25 578.690 156.797   8
   0  11 -25 240.698 205.361  10
   0 -11  26 2736.17 356.408   7
   0 -11 -26 2679.83 318.081   6
   0  11  26 2929.97 272.407   8
   0 -11 -26 2892.37 346.659   1
   0 -11  27 682.306 232.378   7
   0 -11 -27 656.523 203.378   6
   0 -11 -27 152.104 150.683   1
   0 -11 -28-248.352 212.429   1
   0 -11  28 224.732 231.990   7
   0 -11 -28 269.488 182.306   6
   0 -11 -29 2141.52 297.754   6
   0 -11 -29 2231.27 329.275   1
   0 -11  29 1646.88 312.949   7
   0 -11  30 1434.06 322.313   7
   0 -11 -30 1109.42 282.514   1
   0 -11 -30 1066.30 250.524   6
   0 -11  31 4074.91 457.157   7
   0 -11 -31 4354.94 454.402   1
   0 -11 -31 4190.24 419.156   6
   0 -11 -32 8152.76 640.748   1
   0 -11 -32 7123.94 541.565   6
   0 -11  32 8980.15 661.295   7
   0 -11 -33-98.8638 156.609   1
   0 -11 -33-145.891 161.308   6
   0 -11  33-191.783 227.361   7
   0 -11 -34 1763.15 307.595   1
   0 -11  34 2511.51 394.174   7
   0 -11 -34 2083.46 327.166   6
   0 -11 -35 1348.80 289.305   6
   0  11  35 1216.38 324.383  12
   0 -11 -36 342.320 204.529   6
   0  12   0 6780.67 362.095  10
   0 -12   0 7048.33 373.028   6
   0  12   0 6718.43 349.598   8
   0  12  -1 20981.6 675.369   8
   0  12   1 21468.5 668.323   8
   0  12  -1 21345.4 685.911  10
   0  12   1 19947.1 670.907  10
   0 -12   1 21777.2 693.187   6
   0 -12  -1 22017.5 697.668   6
   0  12  -2 14237.7 542.862  10
   0 -12  -2 14737.9 417.162   4
   0  12   2 13466.4 526.050  10
   0 -12  -2 13537.0 538.605   6
   0  12  -2 14781.0 545.786   8
   0 -12   2 14220.0 545.629   6
   0  12   2 14476.5 516.389   8
   0  12   3 641.432 136.352  10
   0  12  -3 690.397 141.904   8
   0 -12  -3 758.387 152.993   6
   0 -12   3 859.915 165.774   6
   0 -12  -3 716.241 92.8279   4
   0  12   3 764.300 133.334   8
   0  12  -3 772.269 154.714  10
   0 -12  -4 18140.4 637.810   6
   0  12  -4 17031.7 621.468  10
   0  12   4 18176.3 590.700   8
   0  12   4 17941.7 444.889  11
   0 -12  -4 18276.5 475.730   4
   0 -12   4 18305.1 628.678   7
   0  12   4 18752.2 628.657  10
   0 -12   4 17405.7 624.558   6
   0  12  -4 19647.0 656.363   8
   0  12   5 3690.77 168.804  11
   0  12  -5 3754.84 289.254  10
   0  12   5 3625.63 249.109   8
   0  12  -5 4077.33 296.166   8
   0 -12  -5 3847.32 283.911   6
   0  12   5 3971.56 277.258  10
   0 -12   5 4098.80 288.569   7
   0 -12   5 3951.15 285.036   6
   0 -12  -5 3884.72 182.777   4
   0 -12   6 26539.0 797.517   7
   0 -12  -6 25856.9 603.013   4
   0  12   6 25159.7 588.634  11
   0  12  -6 25896.9 797.728  10
   0 -12   6 25369.2 784.694   6
   0  12   6 25982.3 724.816   8
   0  12   6 23517.3 762.292  10
   0 -12  -6 27055.8 810.984   6
   0  12   7 21729.8 649.654   8
   0 -12   7 22754.2 730.236   7
   0  12   7 21658.3 715.497  10
   0 -12  -7 21498.2 723.816   6
   0  12  -7 21927.3 724.722  10
   0  12   7 22038.9 530.564  11
   0  12  -8 8148.70 419.759  10
   0  12   8 7610.17 275.881  11
   0  12   8 7985.55 408.871  10
   0  12   8 7946.55 357.284   8
   0 -12   8 8010.66 421.036   7
   0 -12  -8 8221.32 420.277   6
   0 -12  -9 3891.40 295.250   6
   0  12   9 3626.54 274.816  10
   0 -12   9 3959.66 297.177   7
   0  12   9 4388.50 259.785   8
   0  12  -9 4835.00 334.953  10
   0 -12 -10 109.652 60.8468   9
   0  12  10-47.4610 134.383  10
   0 -12  10-45.9487 127.056   7
   0 -12 -10-94.9259 133.921   6
   0  12  10 128.340 87.7952   8
   0  12 -10 88.1137 130.471  10
   0 -12 -11 431.972 144.684   6
   0  12  11 699.433 122.048   8
   0  12 -11 710.005 165.339  10
   0 -12  11 493.909 155.992   7
   0 -12 -11 755.024 101.123   9
   0 -12  12 22.9164 131.802   7
   0  12 -12 35.7763 131.238  10
   0 -12 -12 36.3779 111.829   6
   0 -12 -12 180.982 64.6319   9
   0  12  12 124.884 91.4747   8
   0 -12  13 2397.63 272.316   7
   0  12 -13 2243.48 268.176  10
   0 -12 -13 3055.44 281.131   6
   0 -12 -13 2745.44 162.867   9
   0  12  13 2770.47 215.346   8
   0  12  14 1671.24 171.391   8
   0 -12 -14 1597.70 225.988   6
   0 -12 -14 1450.94 120.859   9
   0  12 -14 1392.76 211.415  10
   0 -12  14 1500.04 226.727   7
   0  12 -15 21376.2 821.947  10
   0 -12 -15 22174.2 795.258   6
   0 -12  15 22051.7 809.623   7
   0  12  15 22558.3 684.109   8
   0  12 -16 4068.46 339.804  10
   0 -12  16 3995.88 352.474   7
   0  12  16 3702.80 256.635   8
   0 -12 -16 4000.58 328.724   6
   0  12 -17 3018.25 318.702  10
   0 -12  17 3380.42 329.744   7
   0  12  17 2807.06 229.648   8
   0 -12 -17 2556.18 287.262   6
   0  12 -18 17582.1 747.836  10
   0  12  18 16737.2 596.432   8
   0 -12  18 16587.9 722.420   7
   0 -12 -18 16929.8 705.992   6
   0 -12  19 214.409 183.259   7
   0 -12 -19 251.527 159.804   6
   0  12 -19 273.075 180.195  10
   0  12  19 348.527 111.328   8
   0  12  20 714.573 132.712   8
   0 -12 -20 957.062 214.620   6
   0 -12  20 897.593 211.143   7
   0  12 -20 875.307 227.172  10
   0 -12  21-32.8799 178.313   7
   0  12  21-190.363 126.456   8
   0  12 -21-358.265 207.233  10
   0 -12 -21 110.620 148.046   6
   0  12  22 3183.46 263.354   8
   0 -12  22 3535.74 375.971   7
   0 -12 -22 3735.31 345.846   6
   0  12 -22 2904.88 341.146  10
   0 -12  23 7.74401 184.583   7
   0  12 -23 120.447 174.746  10
   0 -12 -23 100.356 148.614   6
   0  12  23 63.1449 100.916   8
   0  12 -24-103.719 197.040  10
   0 -12  24 55.8007 163.755   7
   0  12  24-7.34553 108.320   8
   0 -12 -24-59.7431 154.409   6
   0 -12 -25 1176.35 222.419   6
   0 -12 -25 1639.34 307.781   1
   0  12 -25 811.099 240.820  10
   0  12  25 1345.06 195.300   8
   0 -12  25 1112.93 266.336   7
   0 -12 -26 482.432 190.298   6
   0 -12 -26 547.029 229.138   1
   0  12 -26 240.809 233.738  10
   0 -12  26 536.176 237.940   7
   0 -12 -27 5374.92 493.678   1
   0 -12  27 4487.22 461.919   7
   0 -12 -27 5657.03 464.656   6
   0 -12 -28 6685.77 509.670   6
   0 -12  28 7443.81 579.379   7
   0 -12 -28 6272.70 523.261   1
   0 -12 -29 2119.38 311.107   6
   0 -12  29 2024.35 347.560   7
   0 -12 -29 2009.61 322.020   1
   0 -12 -30 506.907 184.888   1
   0 -12  30 1539.48 307.032   7
   0 -12 -30 1038.65 251.881   6
   0 -12  31 1925.23 353.735   7
   0 -12 -31 1670.68 332.985   1
   0 -12 -31 1783.54 305.927   6
   0 -12 -32 3893.41 453.133   1
   0 -12 -32 4241.69 443.044   6
   0 -12  32 4101.46 474.254   7
   0 -12  33 3679.40 462.487   7
   0 -12 -33 3634.72 403.071   6
   0 -12 -33 2999.16 411.452   1
   0 -12 -34 2168.22 335.701   6
   0 -12 -35 901.777 261.626   6
   0  13   0-60.2562 131.112  10
   0 -13   0-63.4804 123.585   6
   0  13   0 104.230 108.741   8
   0  13  -1 293.781 128.586   8
   0 -13  -1 286.053 136.583   6
   0  13   1 345.178 124.075   8
   0  13   1 236.501 136.321  10
   0 -13   1 299.191 141.913   6
   0  13  -1 249.124 135.815  10
   0  13  -2 13328.6 542.576   8
   0 -13   2 13080.2 540.956   6
   0  13   2 12749.7 524.865  10
   0 -13  -2 12953.8 541.532   6
   0  13   2 12966.1 512.747   8
   0 -13  -2 13086.7 404.253   4
   0  13  -2 13488.7 543.093  10
   0  13   3 7914.62 408.434  10
   0 -13   3 8702.07 432.567   6
   0  13  -3 7283.88 394.042  10
   0 -13  -3 7787.78 295.456   4
   0  13   3 8084.44 387.338   8
   0  13  -3 8183.51 420.369   8
   0 -13  -3 8125.54 420.802   6
   0 -13  -4 5334.16 229.135   4
   0 -13   4 5879.03 355.666   7
   0  13   4 5648.08 313.480   8
   0 -13  -4 5480.54 349.335   6
   0  13  -4 4663.43 326.813   8
   0  13  -4 5249.04 339.309  10
   0  13   4 5392.76 332.647  10
   0 -13   4 5346.55 341.021   6
   0  13  -5 1787.25 230.505  10
   0  13   5 2069.94 197.244   8
   0  13   5 1812.77 219.765  10
   0 -13   5 1873.54 222.467   6
   0 -13  -5 1869.44 136.331   4
   0  13  -5 1882.72 231.563   8
   0 -13  -5 1862.10 226.796   6
   0 -13   5 1907.95 231.336   7
   0  13   5 1798.98 120.993  11
   0  13  -6 26386.3 834.555  10
   0 -13  -6 26762.8 838.275   6
   0  13   6 27091.0 834.628  10
   0  13   6 27470.2 613.426  11
   0 -13   6 25498.3 821.763   6
   0 -13  -6 26490.9 637.258   4
   0 -13   6 27156.6 840.259   7
   0  13   6 26367.6 766.951   8
   0  13   7 3449.58 177.454  11
   0  13   7 3193.16 239.512   8
   0  13   7 3142.93 277.813  10
   0 -13  -7 3589.13 291.347   6
   0  13  -7 3933.07 306.841  10
   0 -13   7 3104.26 271.369   7
   0 -13   8 401.843 144.841   7
   0  13   8 457.844 135.070  10
   0 -13  -8 722.394 168.128   6
   0  13   8 553.549 85.8235  11
   0  13   8 572.632 122.092   8
   0  13  -8 442.689 152.403  10
   0  13   9 1970.81 238.596  10
   0  13  -9 1946.68 242.402  10
   0  13   9 2220.29 201.396   8
   0  13   9 2082.94 143.560  11
   0 -13  -9 1925.81 236.490   6
   0 -13   9 1939.96 235.142   7
   0  13  10 22390.2 570.554  11
   0 -13  10 23119.4 786.181   7
   0 -13 -10 20956.9 596.689   9
   0  13  10 22390.1 677.573   8
   0  13 -10 22849.7 786.839  10
   0  13  10 20780.3 748.144  10
   0 -13 -10 22272.3 776.874   6
   0  13 -11 55.4724 153.120  10
   0  13  11-183.928 157.519  10
   0 -13  11-62.7176 150.775   7
   0 -13 -11 43.9589 128.225   6
   0  13  11 233.765 108.852   8
   0 -13 -11 180.449 80.5783   9
   0 -13 -12 10052.7 501.044   6
   0  13 -12 9568.10 500.649  10
   0  13  12 9246.36 478.978  10
   0 -13 -12 9576.05 345.929   9
   0  13  12 9201.08 406.705   8
   0 -13  12 8995.30 489.618   7
   0  13 -13-66.9418 174.659  10
   0 -13 -13 24.8622 137.250   6
   0 -13  13-19.6443 146.180   7
   0 -13 -13 161.059 72.4500   9
   0  13  13 26.1185 91.1037   8
   0  13 -14 1337.03 216.218  10
   0 -13 -14 1550.84 128.208   9
   0  13  14 1762.78 182.926   8
   0 -13 -14 1466.63 220.768   6
   0 -13  14 1729.98 246.015   7
   0  13 -15 877.249 197.431  10
   0 -13 -15 1060.39 108.547   9
   0 -13 -15 1036.29 217.495   6
   0  13  15 1025.96 154.511   8
   0 -13  15 910.655 200.937   7
   0  13 -16 8571.18 516.016  10
   0 -13  16 7959.26 492.908   7
   0 -13 -16 7490.12 463.232   6
   0  13  16 7973.09 389.443   8
   0  13  17 5402.66 327.490   8
   0 -13 -17 5868.03 414.137   6
   0  13 -17 5734.14 426.331  10
   0 -13  17 6160.98 433.234   7
   0  13 -18 250.342 183.945  10
   0  13  18 216.665 108.638   8
   0 -13  18 276.796 185.066   7
   0 -13 -18 304.154 167.856   6
   0  13 -19 2329.45 308.124  10
   0 -13 -19 2380.19 286.645   6
   0 -13  19 2451.70 320.063   7
   0  13  19 2384.43 235.272   8
   0 -13  20 2169.19 308.268   7
   0  13 -20 2104.30 305.365  10
   0  13  20 2030.59 218.652   8
   0 -13 -20 2700.03 312.156   6
   0 -13 -21 11626.7 606.707   6
   0  13  21 10967.9 497.875   8
   0 -13  21 11397.7 630.817   7
   0  13 -21 11552.7 640.944  10
   0  13  22-138.339 122.570   8
   0 -13  22-10.9663 167.361   7
   0 -13 -22 383.364 191.205   6
   0  13 -22 43.2431 195.557  10
   0 -13 -23 84.8473 169.654   6
   0 -13  23 116.982 179.764   7
   0  13 -23-39.0046 208.654  10
   0  13  23-79.3966 116.722   8
   0 -13  24 1493.49 276.645   7
   0  13  24 1303.73 189.375   8
   0 -13 -24 1322.95 245.627   6
   0  13 -24 1404.69 282.822  10
   0 -13  25 443.429 242.156   7
   0 -13 -25 470.677 180.995   6
   0  13 -25 32.8520 184.868  10
   0 -13  26 4968.14 481.677   7
   0  13 -26 4832.82 481.729  10
   0 -13 -26 5427.68 462.179   6
   0 -13 -26 6615.76 544.090   1
   0  13 -27 6649.25 558.862  10
   0 -13  27 5646.41 508.642   7
   0 -13 -27 6428.20 499.979   6
   0 -13 -27 6630.54 538.599   1
   0 -13  28-68.6628 211.914   7
   0 -13 -28 76.8637 189.237   1
   0 -13 -28 5.27238 177.308   6
   0 -13  29 306.493 256.293   7
   0 -13 -29 296.993 180.325   6
   0 -13 -29 137.225 183.640   1
   0 -13 -30 14658.4 838.341   1
   0 -13  30 13234.2 806.567   7
   0 -13 -30 12961.4 743.069   6
   0 -13 -31 2128.14 365.861   1
   0 -13  31 2101.06 357.134   7
   0 -13 -31 1621.97 292.194   6
   0 -13 -32 1201.84 296.871   1
   0 -13  32 1396.67 333.842   7
   0 -13 -32 1049.16 251.487   6
   0 -13 -33-105.587 191.411   6
   0 -13 -34 1381.16 298.638   6
   0  14   0 1127.98 188.102  10
   0  14   0 1137.85 180.250   8
   0 -14   0 1716.11 223.468   6
   0  14  -1 35067.6 1001.19   8
   0  14   1 35771.4 1018.25  10
   0 -14   1 35658.0 1024.76   6
   0 -14  -1 36465.0 841.245   4
   0  14   1 36391.9 997.839   8
   0 -14  -1 35755.3 1020.77   6
   0  14  -1 35996.4 1023.85  10
   0  14  -2 9454.39 473.679  10
   0  14   2 9812.47 478.354  10
   0 -14  -2 10551.3 363.530   4
   0 -14   2 10830.2 501.937   6
   0  14  -2 10634.0 495.221   8
   0  14   2 10907.8 472.975   8
   0 -14  -2 10125.0 491.111   6
   0  14   3 699.581 144.124   8
   0 -14   3 695.891 173.202   6
   0 -14  -3 669.323 99.3227   4
   0 -14   3 803.065 173.194   7
   0 -14  -3 732.930 169.418   6
   0  14  -3 639.356 165.756  10
   0  14   3 598.434 155.602  10
   0  14  -3 749.118 156.428   8
   0 -14  -4 338.611 78.7440   4
   0 -14  -4 181.954 138.082   6
   0 -14   4 431.839 158.332   6
   0  14   4 346.990 160.189  10
   0  14  -4 474.013 150.994   8
   0 -14   4 500.144 176.289   7
   0  14  -4 496.764 167.152  10
   0  14   4 400.561 128.767   8
   0 -14  -5 45673.9 1228.93   6
   0 -14   5 47292.7 1229.29   6
   0  14   5 43577.2 1198.36  10
   0 -14  -5 48028.5 993.115   4
   0 -14   5 45388.5 1216.20   7
   0  14  -5 47271.2 1246.84  10
   0  14   5 46542.2 1161.35   8
   0 -14  -6 4759.67 222.201   4
   0 -14   6 4226.25 326.574   6
   0  14   6 4179.49 315.360  10
   0  14   6 5122.73 310.479   8
   0 -14  -6 4800.56 351.485   6
   0  14   6 4718.46 200.703  11
   0 -14   6 4460.12 335.872   7
   0  14  -6 4304.55 333.310  10
   0  14  -7 8633.37 469.496  10
   0  14   7 8281.05 444.668  10
   0  14   7 7931.49 277.105  11
   0 -14  -7 8086.54 453.316   6
   0 -14   7 7921.59 442.206   7
   0  14   7 8028.00 391.654   8
   0  14  -8 622.807 172.239  10
   0 -14   8 732.292 184.262   7
   0  14   8 381.674 136.537  10
   0 -14  -8 564.391 165.345   6
   0  14   8 612.474 82.3969  11
   0  14   8 440.084 118.356   8
   0 -14   9 2910.88 280.409   7
   0 -14  -9 2361.42 256.418   6
   0  14   9 2925.88 171.090  11
   0  14   9 2389.43 251.453  10
   0  14  -9 2543.34 265.876  10
   0  14   9 2477.15 217.295   8
   0 -14 -10 6973.48 318.416   9
   0  14  10 7296.19 426.656  10
   0  14  10 6822.35 358.096   8
   0  14  10 6557.74 273.401  11
   0 -14  10 6555.24 414.354   7
   0  14 -10 7043.75 434.191  10
   0 -14 -10 7075.20 427.579   6
   0  14  11 3568.91 260.231   8
   0  14 -11 3584.47 324.270  10
   0  14  11 3287.81 296.112  10
   0 -14 -11 3350.82 306.930   6
   0  14  11 3247.68 191.180  11
   0 -14 -11 3300.91 207.023   9
   0 -14  11 2921.62 287.440   7
   0  14 -12 914.258 195.759  10
   0  14  12 667.536 130.065   8
   0 -14 -12 1187.24 133.892   9
   0 -14 -12 1048.64 203.509   6
   0  14  12 444.204 165.609  10
   0 -14  12 1295.33 219.530   7
   0  14  13 3065.22 300.111  10
   0 -14 -13 3615.48 210.499   9
   0 -14  13 4005.49 350.989   7
   0  14 -13 3492.44 329.360  10
   0  14  13 3377.58 256.039   8
   0 -14 -13 3256.51 304.821   6
   0  14  14 238.597 169.811  10
   0 -14 -14 175.982 68.5024   9
   0  14  14 168.490 103.559   8
   0  14 -14 84.6196 165.247  10
   0 -14  14 299.670 185.357   7
   0 -14 -14 62.7228 146.003   6
   0  14 -15 1014.01 207.400  10
   0  14  15 1074.45 159.672   8
   0 -14  15 1328.04 246.471   7
   0 -14 -15 1412.18 235.836   6
   0  14  16 1568.97 187.542   8
   0  14 -16 1465.54 236.951  10
   0 -14  16 1647.87 250.661   7
   0 -14 -16 1585.55 250.252   6
   0 -14 -17 3565.33 349.263   6
   0  14  17 3245.05 259.597   8
   0  14 -17 3186.33 350.289  10
   0 -14  17 3725.67 358.856   7
   0 -14  18 12574.9 649.686   7
   0  14 -18 11884.4 644.628  10
   0  14  18 12010.5 512.297   8
   0 -14 -18 11549.6 603.032   6
   0  14 -19 5745.05 460.279  10
   0 -14  19 5382.29 445.704   7
   0 -14 -19 5346.08 416.739   6
   0  14  19 5898.93 353.879   8
   0  14  20 804.345 162.061   8
   0 -14 -20 1389.18 247.917   6
   0 -14  20 663.368 207.807   7
   0  14 -20 770.437 240.587  10
   0  14  21 4834.12 332.087   8
   0  14 -21 4667.49 446.551  10
   0 -14  21 4141.65 405.898   7
   0 -14 -21 4842.10 416.764   6
   0  14 -22 4663.65 442.794  10
   0  14  22 4500.07 329.913   8
   0 -14  22 5095.76 444.793   7
   0 -14 -22 4681.67 404.397   6
   0 -14  23 223.643 208.269   7
   0 -14 -23 70.5933 176.124   6
   0  14 -23-12.4907 204.553  10
   0  14 -24 783.932 238.831  10
   0 -14 -24 855.501 197.985   6
   0 -14  24 1211.27 274.336   7
   0  14 -25 1275.55 270.626  10
   0 -14  25 1889.78 333.557   7
   0 -14 -25 1855.29 294.426   6
   0  14 -26 9334.64 656.410  10
   0 -14 -26 9159.55 596.318   6
   0 -14  26 9711.65 650.385   7
   0 -14 -27 801.521 275.941   1
   0 -14 -27 168.655 171.856   6
   0 -14  27 418.607 247.247   7
   0  14 -27 278.485 235.973  10
   0  14 -28 721.363 245.460  10
   0 -14  28 672.377 267.743   7
   0 -14 -28 420.009 214.015   6
   0 -14 -28 306.406 206.338   1
   0 -14 -29 50.4657 167.504   1
   0 -14  29 886.983 273.493   7
   0 -14 -29 543.296 221.208   6
   0 -14  30 1056.82 297.708   7
   0 -14 -30 820.410 249.679   1
   0 -14 -30 1173.15 275.564   6
   0 -14  31 5679.52 543.057   7
   0 -14 -31 5284.36 527.527   1
   0 -14 -31 5366.73 495.003   6
   0 -14 -32 211.344 205.493   6
   0 -14 -33 185.029 203.655   6
   0 -15   0 192.255 148.997   6
   0  15   0 222.513 144.128   8
   0  15   0 184.647 140.610  10
   0 -15   1 1629.07 223.965   6
   0 -15  -1 2062.23 254.872   6
   0  15  -1 2014.34 241.134   8
   0  15  -1 1700.27 232.091  10
   0  15   1 1415.43 201.654   8
   0 -15  -1 1590.34 151.476   4
   0  15   1 1368.87 208.114  10
   0  15   2 96.8491 136.899  10
   0 -15   2-110.966 143.820   6
   0  15   2 270.785 129.866   8
   0  15  -2 140.183 141.748  10
   0 -15  -2 210.493 152.309   6
   0 -15  -2 102.243 64.8260   4
   0  15  -2 70.2342 127.862   8
   0 -15  -3 878.827 110.427   4
   0  15   3 665.419 144.748   8
   0  15   3 823.628 187.420  10
   0 -15   3 776.503 172.077   6
   0  15  -3 625.491 168.337  10
   0  15  -3 729.351 174.639   8
   0 -15  -3 1210.10 206.824   6
   0 -15   3 701.072 173.411   7
   0 -15   4 5217.97 366.738   6
   0 -15  -4 5676.39 256.007   4
   0  15  -4 5325.45 379.556   8
   0  15  -4 5520.06 377.924  10
   0  15   4 5250.06 370.080  10
   0 -15   4 6034.68 387.491   7
   0 -15  -4 5144.04 367.315   6
   0  15   4 6181.34 360.086   8
   0 -15   5 5789.43 386.996   6
   0 -15   5 5672.52 385.656   7
   0 -15  -5 5995.84 393.306   6
   0  15  -5 6058.79 396.033  10
   0 -15  -5 6011.81 263.741   4
   0  15   5 5400.26 368.660  10
   0  15   5 5844.96 349.642   8
   0  15  -6 342.120 171.827  10
   0  15   6-6.16062 133.353  10
   0 -15   6 305.113 158.848   6
   0 -15   6 392.466 154.256   7
   0  15   6 375.110 137.342   8
   0  15   6 343.479 71.5203  11
   0 -15  -6 191.992 79.7809   4
   0 -15  -6 550.548 186.645   6
   0  15   7 39071.1 1053.90   8
   0 -15  -7 38188.5 1138.49   6
   0  15   7 41148.9 850.763  11
   0  15   7 40193.8 1136.52  10
   0  15  -7 39063.6 1143.88  10
   0 -15   7 37686.3 1125.20   7
   0 -15   8 380.605 170.008   7
   0  15   8 224.052 158.243  10
   0 -15  -8 373.491 157.159   6
   0  15   8 425.962 73.1834  11
   0  15  -8 401.469 165.967  10
   0  15   8 361.792 129.446   8
   0  15   9 3641.03 188.714  11
   0  15   9 3152.90 258.923   8
   0 -15  -9 2985.18 293.663   6
   0  15  -9 3513.70 318.601  10
   0 -15   9 3402.46 315.268   7
   0  15   9 2914.94 289.513  10
   0 -15 -10 4071.12 346.870   6
   0  15  10 4524.21 217.657  11
   0 -15  10 4073.41 338.554   7
   0  15  10 4128.73 295.104   8
   0  15 -10 4568.64 378.350  10
   0 -15 -10 4180.71 254.581   9
   0  15  10 4350.65 346.806  10
   0  15  11 13389.2 629.108  10
   0  15  11 15732.7 459.714  11
   0  15 -11 14687.5 665.815  10
   0 -15 -11 15349.1 501.719   9
   0 -15  11 14174.4 654.607   7
   0 -15 -11 14115.3 647.562   6
   0  15  11 14694.8 568.178   8
   0  15  12 3643.28 211.114  11
   0 -15 -12 3577.55 345.622   6
   0  15  12 4026.00 343.745  10
   0  15  12 3949.89 285.346   8
   0  15 -12 3417.05 334.890  10
   0 -15 -12 3985.66 230.990   9
   0 -15  12 2944.69 315.076   7
   0  15 -13 20170.5 822.806  10
   0  15  13 21149.3 813.740  10
   0  15  13 22524.8 720.243   8
   0 -15 -13 22269.6 610.467   9
   0  15  13 19924.5 585.203  11
   0 -15  13 20841.4 820.510   7
   0 -15 -13 20634.8 815.129   6
   0 -15  14 11030.8 589.350   7
   0  15  14 10048.0 551.026  10
   0  15 -14 11318.0 602.106  10
   0  15  14 11309.1 488.796   8
   0 -15 -14 10515.6 569.942   6
   0 -15  15 3914.70 352.760   7
   0 -15 -15 3327.28 334.853   6
   0  15 -15 3529.26 349.476  10
   0  15  15 3423.51 333.081  10
   0  15  15 3601.10 277.470   8
   0  15  16 5257.75 417.715  10
   0  15 -16 5989.52 455.478  10
   0  15  16 5614.34 347.373   8
   0 -15 -16 5811.01 435.408   6
   0 -15  16 6293.44 458.429   7
   0  15  17 8522.50 430.559   8
   0 -15 -17 8260.33 517.996   6
   0  15 -17 8652.24 551.790  10
   0 -15  17 8837.46 552.120   7
   0  15  18 46.6987 107.466   8
   0  15 -18 336.352 219.496  10
   0 -15 -18 168.506 195.137   6
   0 -15  18 181.169 197.833   7
   0 -15  19 34.2381 175.724   7
   0  15  19 117.729 109.360   8
   0  15 -19 308.565 210.816  10
   0 -15 -19 280.127 185.931   6
   0  15 -20 2268.57 332.720  10
   0 -15 -20 2073.05 291.881   6
   0  15  20 2439.62 244.505   8
   0 -15  20 2205.50 324.400   7
   0 -15 -21 3737.55 376.055   6
   0  15 -21 3254.34 376.715  10
   0  15  21 3420.22 285.510   8
   0 -15  21 3130.37 366.861   7
   0 -15  22 8316.28 582.750   7
   0 -15 -22 7702.50 535.683   6
   0  15 -22 7684.83 561.145  10
   0 -15  23 654.786 252.823   7
   0  15 -23 453.672 219.918  10
   0 -15 -23 787.670 222.169   6
   0 -15 -24 1157.42 258.359   6
   0  15 -24 1429.06 306.870  10
   0 -15  24 1155.34 285.366   7
   0  15 -25-241.714 239.051  10
   0 -15 -25 433.747 198.969   6
   0 -15  25 179.794 196.759   7
   0 -15 -26 835.496 228.955   6
   0  15 -26 1588.05 318.493  10
   0 -15  26 1347.12 290.545   7
   0 -15  27 792.668 263.807   7
   0 -15 -27 116.062 181.931   6
   0  15 -27 221.782 215.635  10
   0 -15  28 287.960 246.938   7
   0  15 -28 192.653 259.366  10
   0 -15 -28 98.6099 189.406   6
   0 -15 -29 19494.2 947.636   6
   0  15 -29 20994.0 1047.17  10
   0 -15  29 21133.0 1033.84   7
   0 -15 -29 22230.6 1066.67   1
   0 -15 -30-60.3266 168.053   6
   0 -15  30 247.802 293.375   7
   0 -15 -30-150.555 203.691   1
   0 -15 -31 9271.50 650.209   6
   0 -15 -32 2252.23 354.689   6
   0 -16   0 18828.6 745.574   6
   0  16   0 20046.0 739.321   8
   0  16   0 18990.3 738.886  10
   0 -16   0 20722.5 596.328   4
   0  16  -1 4508.89 344.871   8
   0  16   1 4041.08 330.358  10
   0  16   1 5126.69 358.153   8
   0 -16  -1 4787.44 362.326   6
   0 -16  -1 5067.79 256.825   4
   0 -16   1 4702.17 355.795   6
   0  16  -1 4488.31 351.472  10
   0 -16  -2 770.914 180.066   6
   0 -16  -2 1306.09 133.614   4
   0  16   2 1294.72 201.010   8
   0  16  -2 826.491 200.742  10
   0  16   2 1539.34 231.017  10
   0 -16   2 1530.07 235.363   6
   0  16  -2 1188.67 209.150   8
   0  16  -3 4376.77 352.047  10
   0 -16  -3 4911.03 368.365   6
   0 -16  -3 4901.76 242.431   4
   0 -16   3 4746.07 368.794   6
   0  16   3 4648.30 328.479   8
   0  16   3 4417.31 348.821  10
   0  16  -3 4413.78 347.600   8
   0 -16   3 4570.96 354.118   7
   0 -16   4 7403.83 442.999   6
   0 -16  -4 7523.62 308.143   4
   0  16  -4 7275.43 442.685   8
   0  16  -4 7658.58 459.820  10
   0 -16   4 7338.50 441.272   7
   0  16   4 7300.56 435.199  10
   0  16   4 7464.93 413.601   8
   0 -16  -4 7189.29 447.058   6
   0  16   5 7255.18 404.029   8
   0  16   5 6930.65 439.991  10
   0 -16  -5 6842.81 438.338   6
   0 -16   5 7167.14 445.845   6
   0  16  -5 7125.27 442.717  10
   0 -16  -5 7744.08 305.018   4
   0 -16   5 7754.16 456.849   7
   0 -16  -6 1191.72 120.041   4
   0 -16   6 1082.35 206.333   6
   0 -16  -6 955.616 211.793   6
   0  16  -6 1035.59 218.090  10
   0  16   6 1099.69 209.828  10
   0 -16   6 1067.48 215.629   7
   0  16   6 1171.18 187.573   8
   0 -16  -7 4522.96 370.336   6
   0 -16   7 4810.84 376.765   7
   0  16   7 4454.94 366.361  10
   0  16   7 4834.13 328.239   8
   0  16  -7 4418.11 372.813  10
   0  16  -8 173.655 160.336  10
   0 -16   8 293.570 181.372   7
   0 -16  -8 97.7747 129.531   6
   0  16   8 216.364 140.915  10
   0  16   8 145.350 115.586   8
   0 -16   9 19.7312 156.009   7
   0  16   9 442.076 138.845   8
   0  16   9 375.710 142.601  10
   0  16  -9 338.928 175.401  10
   0 -16  -9 381.544 164.535   6
   0  16  10 417.976 149.644  10
   0 -16  10 672.828 195.525   7
   0 -16 -10 485.302 110.657   9
   0  16  10 515.792 141.061   8
   0 -16 -10 614.528 187.988   6
   0  16 -10 829.611 218.423  10
   0 -16 -11 7632.17 351.350   9
   0  16  11 6564.31 385.150   8
   0 -16  11 7379.45 481.497   7
   0  16  11 7111.65 458.880  10
   0 -16 -11 6933.00 460.570   6
   0  16 -11 6704.36 460.117  10
   0 -16 -12 4401.43 256.688   9
   0  16 -12 4042.19 360.808  10
   0 -16 -12 4449.60 383.369   6
   0  16  12 3914.97 347.797  10
   0  16  12 4422.59 318.268   8
   0 -16  12 5047.85 402.583   7
   0  16  13 2712.58 248.511   8
   0 -16 -13 2732.71 313.526   6
   0  16 -13 2280.33 303.479  10
   0 -16  13 2794.18 323.383   7
   0  16  13 2747.91 309.265  10
   0 -16  14 3873.88 370.678   7
   0  16 -14 3797.20 366.521  10
   0  16  14 3388.06 332.738  10
   0  16  14 3784.51 295.232   8
   0 -16 -14 3347.32 343.112   6
   0  16 -15 947.765 221.787  10
   0  16  15 1071.71 225.880  10
   0 -16 -15 1335.18 256.818   6
   0  16  15 997.248 164.431   8
   0 -16  15 1349.07 261.869   7
   0 -16  16 10495.5 600.362   7
   0  16  16 9648.03 475.090   8
   0  16 -16 9854.44 606.978  10
   0 -16 -16 9804.24 576.340   6
   0  16  16 9216.79 553.737  10
   0  16 -17 24863.4 996.772  10
   0 -16  17 25210.9 982.088   7
   0 -16 -17 23245.6 927.812   6
   0  16  17 25108.2 813.949   8
   0  16  17 24287.7 951.121  10
   0 -16  18 10184.8 620.041   7
   0 -16 -18 10030.6 600.458   6
   0  16 -18 10529.9 637.859  10
   0  16  18 9406.45 478.885   8
   0  16  18 8991.51 574.390  10
   0 -16  19 18264.3 841.100   7
   0  16 -19 18183.4 855.369  10
   0 -16 -19 17354.8 802.366   6
   0  16  19 18062.2 680.394   8
   0 -16 -20 2041.76 297.951   6
   0  16 -20 1674.46 309.958  10
   0 -16  20 1867.36 312.499   7
   0 -16 -21 2161.34 314.949   6
   0  16 -21 1879.70 314.029  10
   0 -16  21 2192.99 326.678   7
   0 -16 -22 1619.13 284.608   6
   0 -16  22 1709.10 309.400   7
   0  16 -22 2173.45 338.053  10
   0  16 -23 5535.11 517.785  10
   0 -16  23 5609.37 494.151   7
   0 -16 -23 5057.36 464.243   6
   0 -16  24 8385.26 610.904   7
   0  16 -24 7128.66 577.258  10
   0 -16 -24 7355.82 557.926   6
   0 -16  25 7966.27 607.139   7
   0 -16 -25 8427.32 593.263   6
   0  16 -25 8258.53 628.059  10
   0 -16  26 2175.63 362.274   7
   0  16 -26 2325.60 362.779  10
   0 -16 -26 2073.75 335.057   6
   0 -16  27-8.08306 226.823   7
   0 -16 -27 51.1991 164.785   6
   0  16 -27-123.252 229.485  10
   0  16 -28-139.861 260.204  10
   0 -16 -28-60.3171 191.772   6
   0 -16  28-151.223 209.212   7
   0  16 -29 4876.37 507.603  10
   0 -16  29 5333.69 543.193   7
   0 -16 -29 4753.01 493.423   1
   0 -16 -29 4903.87 481.156   6
   0 -16 -30 659.497 254.924   6
   0 -16 -31 544.220 245.292   6
   0 -17   0 299.216 160.332   6
   0 -17   0 321.466 100.082   4
   0  17   0 302.866 161.270   8
   0  17   0 273.430 159.426  10
   0 -17   1 776.640 189.740   6
   0  17   1 772.501 191.760  10
   0  17  -1 1233.23 211.574   8
   0  17   1 1078.24 198.644   8
   0 -17  -1 1278.39 146.426   4
   0  17  -1 1009.41 196.941  10
   0 -17  -1 1394.04 226.083   6
   0 -17  -2 3852.46 229.419   4
   0  17  -2 3430.09 320.415   8
   0 -17   2 3785.05 339.350   7
   0  17   2 3710.42 342.015  10
   0  17   2 3845.53 322.953   8
   0  17  -2 3481.76 325.019  10
   0 -17  -2 3911.73 345.285   6
   0 -17   2 3873.56 337.650   6
   0  17  -3 2923.63 298.704  10
   0 -17  -3 2577.16 185.945   4
   0 -17   3 2879.07 298.240   7
   0  17   3 2828.06 273.691   8
   0  17  -3 2928.13 299.578   8
   0 -17   3 2724.87 303.208   6
   0  17   3 2332.57 276.253  10
   0 -17  -3 2913.47 306.054   6
   0  17  -4 1566.36 240.728  10
   0  17   4 1610.70 222.212   8
   0 -17   4 1797.91 244.807   7
   0  17   4 1783.51 252.747  10
   0 -17   4 2290.20 285.656   6
   0 -17  -4 1844.98 157.184   4
   0 -17  -4 1449.43 245.325   6
   0 -17   5 190.244 171.352   7
   0  17   5 82.5555 139.530   8
   0 -17  -5 274.503 178.153   6
   0 -17   5 252.426 177.501   6
   0  17   5 25.0079 149.389  10
   0 -17  -5 80.9768 74.2016   4
   0  17  -5 64.5378 158.356  10
   0 -17   6 15189.7 677.510   7
   0 -17  -6 15778.8 699.222   6
   0  17   6 13942.9 651.021  10
   0  17   6 16352.6 644.692   8
   0  17  -6 15338.6 687.012  10
   0 -17   6 15581.0 693.620   6
   0 -17  -6 16461.0 481.249   4
   0  17   7 2050.76 282.442  10
   0 -17   7 1796.37 274.972   7
   0  17  -7 2167.71 285.364  10
   0 -17  -7 2052.49 278.897   6
   0  17   7 2003.06 235.668   8
   0 -17   8 20734.7 812.851   7
   0 -17  -8 19757.5 803.763   6
   0  17  -8 19929.0 814.411  10
   0  17   8 21166.2 821.383  10
   0  17   8 21235.8 742.187   8
   0  17   9 4579.28 383.685  10
   0  17  -9 5042.77 398.228  10
   0 -17  -9 4773.44 389.167   6
   0 -17   9 4854.73 397.679   7
   0  17   9 5484.86 361.935   8
   0 -17 -10 4136.68 369.358   6
   0  17  10 3914.60 361.583  10
   0  17  10 4242.03 314.499   8
   0 -17  10 3769.52 352.134   7
   0 -17 -10 4046.13 273.146   9
   0  17 -10 3632.28 355.829  10
   0  17  11 240.075 128.262   8
   0  17  11-81.9602 161.676  10
   0  17 -11-118.744 181.750  10
   0 -17 -11-237.492 178.474   6
   0 -17  11 57.5663 165.581   7
   0 -17 -11 172.597 96.1274   9
   0  17  12 16617.0 743.330  10
   0 -17 -12 18262.7 776.370   6
   0  17 -12 17777.4 784.025  10
   0  17  12 17196.3 666.618   8
   0 -17  12 16343.6 751.483   7
   0  17  13-30.7217 114.864   8
   0  17 -13 60.2787 179.198  10
   0 -17 -13-79.1310 156.169   6
   0 -17  13 53.1014 178.415   7
   0  17  13 132.154 173.852  10
   0 -17  14 11793.5 649.681   7
   0  17 -14 12584.9 664.482  10
   0 -17 -14 10971.9 614.182   6
   0  17  14 12606.3 555.829   8
   0  17  14 11890.2 626.557  10
   0  17  15 1909.04 228.415   8
   0 -17 -15 1549.64 252.153   6
   0  17  15 1441.21 269.747  10
   0  17 -15 2132.48 309.797  10
   0 -17  15 1652.02 275.202   7
   0  17 -16 858.630 243.366  10
   0  17  16 591.337 145.478   8
   0 -17 -16 504.351 196.496   6
   0 -17  16 305.109 193.040   7
   0  17  16 445.432 195.943  10
   0  17 -17 2132.37 324.697  10
   0  17  17 2470.20 255.610   8
   0  17  17 2323.96 326.568  10
   0 -17 -17 2195.88 303.894   6
   0 -17  17 2636.15 351.857   7
   0  17  18 4892.78 352.417   8
   0  17  18 5463.62 463.649  10
   0 -17 -18 5543.70 454.080   6
   0  17 -18 6228.60 506.999  10
   0 -17  18 5378.91 473.008   7
   0 -17  19 4715.86 444.495   7
   0  17  19 3862.40 401.503  10
   0  17 -19 4266.89 432.386  10
   0 -17 -19 3860.42 392.810   6
   0 -17 -20 776.068 225.666   6
   0 -17  20 725.987 250.564   7
   0  17  20 468.022 203.817  10
   0  17 -20 834.876 265.060  10
   0  17  21 437.710 208.131  10
   0 -17  21 568.842 230.817   7
   0  17 -21 1073.01 276.146  10
   0 -17 -21 870.917 237.348   6
   0 -17 -22 4779.85 441.587   6
   0 -17  22 4427.84 460.076   7
   0  17 -22 4650.59 472.326  10
   0  17 -23 317.853 237.233  10
   0 -17  23 183.908 215.044   7
   0 -17 -23-211.975 172.645   6
   0  17 -24 5081.98 508.979  10
   0 -17  24 4356.53 473.935   7
   0 -17 -24 4563.31 456.422   6
   0 -17 -25 2759.32 366.858   6
   0 -17  25 2990.35 420.217   7
   0  17 -25 2988.55 408.234  10
   0 -17 -26-171.033 208.809   6
   0  17 -26 300.160 248.921  10
   0 -17  26-139.974 218.114   7
   0  17 -27 1479.91 342.385  10
   0 -17  27 1804.32 359.117   7
   0 -17 -27 1705.42 317.315   6
   0 -17  28 5354.80 541.809   7
   0 -17 -28 5611.95 515.150   6
   0  17 -28 6344.86 579.439  10
   0 -17 -29 199.152 214.671   6
   0 -18   0 11863.5 608.311   6
   0  18   0 11422.4 590.825  10
   0  18   0 11766.0 582.355   8
   0 -18   0 12329.7 457.403   4
   0  18   1 630.577 187.093   8
   0  18  -1 295.669 143.736   8
   0 -18   1 600.151 120.752   4
   0  18  -1 383.533 167.434  10
   0 -18  -1 365.897 190.037   6
   0  18   1 117.792 162.176  10
   0 -18  -1 374.382 98.5182   4
   0 -18   1 576.770 183.742   6
   0 -18  -2 3002.33 328.895   6
   0 -18   2 2915.40 314.155   6
   0  18  -2 3765.02 336.125   8
   0  18   2 3044.77 300.946   8
   0  18   2 3093.58 318.557  10
   0 -18  -2 3457.59 220.616   4
   0  18  -2 3273.29 329.627  10
   0 -18   2 3124.20 326.169   7
   0  18   3 1726.62 231.473   8
   0  18   3 2349.40 296.896  10
   0 -18  -3 2223.14 281.535   6
   0 -18   3 2036.04 279.194   7
   0  18  -3 2196.03 279.231   8
   0  18  -3 1725.20 258.554  10
   0 -18   3 1851.57 245.156   6
   0  18   4 7732.59 456.474   8
   0 -18  -4 8081.45 499.172   6
   0 -18   4 7181.44 477.884   6
   0  18   4 7545.00 488.705  10
   0  18  -4 7593.41 479.764  10
   0 -18   4 7182.51 474.370   7
   0 -18   5 2622.52 314.260   6
   0 -18   5 2634.84 303.131   7
   0  18  -5 2933.49 326.029  10
   0  18   5 2989.41 326.474  10
   0  18   5 3006.68 279.586   8
   0 -18  -5 2762.53 323.811   6
   0 -18   6 11054.2 588.959   7
   0  18   6 11330.9 554.112   8
   0 -18  -6 10744.5 591.381   6
   0  18   6 11545.7 600.801  10
   0  18  -6 12193.1 635.508  10
   0  18   7 2960.98 281.893   8
   0  18  -7 3013.19 332.911  10
   0  18   7 2889.92 317.334  10
   0 -18   7 3051.21 343.792   7
   0 -18  -7 2922.12 330.268   6
   0  18   8 546.227 170.381  10
   0  18   8 889.618 184.150   8
   0 -18   8 359.596 158.939   7
   0  18  -8 605.543 212.663  10
   0 -18  -8 447.458 199.828   6
   0  18   9 4221.39 381.274  10
   0 -18   9 4178.70 386.726   7
   0  18  -9 4336.19 392.135  10
   0 -18  -9 5281.22 423.656   6
   0  18   9 5431.07 374.381   8
   0  18  10 230.279 136.359   8
   0  18  10-187.931 199.235  10
   0 -18  10 10.0042 153.329   7
   0  18 -10 45.6845 185.733  10
   0 -18 -10 129.766 144.152   6
   0 -18 -10 88.0906 92.2848   9
   0 -18 -11 3119.66 335.365   6
   0  18  11 3929.05 323.236   8
   0  18 -11 3958.79 383.483  10
   0  18  11 3027.69 321.813  10
   0 -18  11 3078.54 347.841   7
   0 -18 -12-37.2414 174.567   6
   0  18  12-44.4115 176.229  10
   0 -18  12 132.167 166.869   7
   0  18 -12-50.6465 181.909  10
   0  18  12 111.314 126.262   8
   0 -18 -13 6512.96 479.669   6
   0  18 -13 5842.92 472.911  10
   0  18  13 6679.13 409.410   8
   0 -18  13 5991.18 477.190   7
   0  18  13 6305.63 467.396  10
   0 -18 -14 1191.16 256.229   6
   0  18 -14 958.049 225.839  10
   0  18  14 931.815 237.179  10
   0  18  14 1235.05 199.476   8
   0 -18  14 1165.22 256.094   7
   0 -18 -15 7978.30 534.190   6
   0  18  15 8614.15 471.474   8
   0  18  15 9631.60 587.196  10
   0 -18  15 9301.55 591.523   7
   0  18 -15 9451.63 602.763  10
   0  18  16 608.614 171.334   8
   0  18  16 411.419 238.843  10
   0 -18  16 744.512 256.495   7
   0  18 -16 709.302 256.273  10
   0 -18 -16 653.539 218.371   6
   0 -18 -17 8336.88 560.110   6
   0  18 -17 8682.83 599.240  10
   0 -18  17 8336.11 582.622   7
   0  18  17 7728.53 544.887  10
   0  18 -18 5064.26 476.796  10
   0 -18 -18 5452.71 473.974   6
   0  18  18 4964.48 457.172  10
   0 -18  18 4852.92 460.090   7
   0  18 -19 3395.95 403.497  10
   0  18  19 2959.22 367.406  10
   0 -18 -19 3633.53 387.993   6
   0 -18  19 4095.11 430.974   7
   0  18 -20 38.8254 200.270  10
   0  18  20-42.1130 189.483  10
   0 -18 -20 220.821 161.545   6
   0 -18  20 71.9131 210.597   7
   0 -18 -21-35.6107 194.506   6
   0 -18  21 419.602 249.551   7
   0  18 -21 167.977 222.025  10
   0  18  21 172.901 203.073  10
   0 -18  22 6636.47 555.167   7
   0  18 -22 6993.32 567.728  10
   0 -18 -22 6274.38 522.595   6
   0  18  22 6284.63 526.338  10
   0 -18 -23 10281.1 658.138   6
   0 -18  23 10042.4 692.059   7
   0  18  23 9557.26 655.428  10
   0  18 -23 11547.9 742.548  10
   0  18  24 3753.90 440.268  10
   0 -18 -24 4264.58 445.329   6
   0 -18  24 4041.57 472.679   7
   0  18 -24 4592.09 505.370  10
   0  18 -25 6768.47 603.316  10
   0  18  25 6997.23 575.631  10
   0 -18  25 6923.18 603.768   7
   0 -18 -25 6791.74 566.493   6
   0 -18 -26 146.174 194.491   6
   0  18 -26-26.0269 256.035  10
   0 -18  26 264.975 245.722   7
   0 -18 -27 316.506 225.480   6
   0 -18 -28 4665.00 480.283   6
   0  19   0 209.407 167.214  10
   0 -19   0 284.274 196.496   6
   0  19   0 259.235 150.526   8
   0 -19  -1 513.852 203.584   6
   0  19  -1 525.681 174.478   8
   0  19   1 126.497 133.069   8
   0 -19   1 436.574 177.325   6
   0 -19   1 301.816 194.304   7
   0  19   1 107.312 157.596  10
   0  19  -1 135.738 156.109  10
   0 -19   1 725.380 133.412   4
   0  19   2-69.0328 150.675   8
   0 -19   2 191.962 185.937   7
   0  19  -2 239.116 187.455  10
   0  19   2 8.45576 159.912  10
   0 -19  -2 16.4027 148.319   6
   0 -19   2 54.2148 149.456   6
   0  19  -2-148.198 165.320   8
   0  19  -3 691.196 204.519  10
   0 -19   3 1080.49 228.590   6
   0  19   3 987.380 220.130  10
   0  19   3 1389.86 224.821   8
   0 -19   3 772.929 212.752   7
   0 -19  -3 953.301 218.846   6
   0  19   4 369.191 160.985   8
   0  19   4 242.444 187.336  10
   0 -19   4 290.104 196.015   7
   0  19  -4 532.792 207.026  10
   0 -19   4 516.477 181.531   6
   0 -19  -4 339.693 199.639   6
   0  19  -5 9653.97 580.674  10
   0 -19   5 10128.6 579.424   6
   0 -19   5 9817.07 570.350   7
   0  19   5 10132.2 533.275   8
   0  19   5 9998.04 575.373  10
   0 -19  -5 9764.50 577.583   6
   0 -19   6 1408.52 259.267   7
   0  19   6 1323.67 259.233  10
   0  19  -6 1062.60 248.525  10
   0 -19  -6 1293.86 254.305   6
   0  19   6 1109.54 201.739   8
   0  19  -7 4884.21 416.924  10
   0  19   7 3632.94 359.431  10
   0  19   7 4751.56 364.987   8
   0 -19   7 4381.67 398.698   7
   0 -19  -7 4293.12 386.533   6
   0 -19   8-120.467 165.891   7
   0  19   8 122.578 168.853  10
   0  19   8 339.986 170.891   8
   0  19  -8-314.907 200.290  10
   0 -19  -8-16.0894 169.224   6
   0  19   9 1337.53 214.355   8
   0 -19  -9 1381.19 259.142   6
   0  19   9 1349.93 239.712  10
   0  19  -9 1267.15 236.953  10
   0 -19   9 1777.03 289.675   7
   0 -19  10 1306.42 255.771   7
   0  19 -10 1256.36 257.649  10
   0  19  10 1548.10 232.550   8
   0 -19 -10 1089.72 240.597   6
   0  19  10 1464.24 266.955  10
   0  19  11 13317.6 692.706  10
   0  19  11 13856.4 625.987   8
   0  19 -11 13527.0 708.725  10
   0 -19 -11 13772.8 703.738   6
   0 -19  11 13450.5 707.357   7
   0  19  12 296.899 174.749  10
   0 -19 -12 311.252 199.860   6
   0  19  12 755.606 181.927   8
   0  19 -12 491.884 213.547  10
   0 -19  12 791.520 232.684   7
   0 -19 -13 7722.76 541.827   6
   0  19 -13 7602.78 550.805  10
   0  19  13 8238.09 538.190  10
   0  19  13 8678.17 478.777   8
   0 -19  13 7905.61 548.667   7
   0  19 -14 998.875 248.158  10
   0  19  14 737.330 218.084  10
   0  19  14 1145.78 198.700   8
   0 -19  14 1200.18 277.163   7
   0 -19 -14 1231.49 270.162   6
   0 -19 -15 3047.81 366.072   6
   0  19  15 2543.37 367.714  10
   0  19 -15 2428.37 357.293  10
   0 -19  15 3036.90 381.082   7
   0 -19  16 10676.7 663.497   7
   0 -19 -16 11404.1 668.162   6
   0  19 -16 11728.2 698.761  10
   0  19  16 11508.6 669.752  10
   0  19 -17 2719.36 359.922  10
   0 -19 -17 3201.11 378.020   6
   0 -19  17 3139.37 394.966   7
   0  19  17 2230.78 327.840  10
   0 -19 -18 1419.55 270.694   6
   0  19  18 727.397 231.934  10
   0  19 -18 1878.93 321.356  10
   0 -19  18 1440.71 286.061   7
   0  19 -19 3633.40 412.938  10
   0 -19  19 3664.18 415.581   7
   0  19  19 3468.96 407.340  10
   0 -19 -19 2945.35 367.929   6
   0 -19  20 16836.1 878.825   7
   0 -19 -20 16174.3 831.692   6
   0  19  20 15144.2 817.666  10
   0  19 -20 17593.1 902.876  10
   0  19  21 206.366 196.306  10
   0 -19 -21 568.766 220.318   6
   0  19 -21 383.594 251.709  10
   0 -19  21 283.034 233.447   7
   0 -19 -22 609.163 216.529   6
   0 -19  22 655.871 241.741   7
   0  19 -22 1217.48 311.814  10
   0  19  22 488.751 207.625  10
   0 -19 -23 176.287 202.999   6
   0  19  23 108.110 206.206  10
   0 -19  23 156.691 233.714   7
   0  19 -23 286.965 214.333  10
   0 -19 -24 879.074 264.913   6
   0  19  24 579.733 265.896  10
   0  19 -24 512.648 263.420  10
   0 -19  24 655.188 294.186   7
   0  19  25 9776.90 690.251  10
   0 -19  25 8928.78 680.718   7
   0 -19 -25 9141.58 660.336   6
   0  19 -25 9666.99 716.863  10
   0 -19 -26 6952.22 582.689   6
   0  20   0 9471.13 559.591   8
   0 -20   0 9150.26 574.088   6
   0  20   0 9362.33 579.841  10
   0 -20   1 3070.61 340.959   6
   0  20   1 3488.56 360.702  10
   0 -20   1 3157.56 354.764   7
   0  20   1 3634.25 370.797   8
   0 -20  -1 3187.72 356.303   6
   0  20  -1 3766.56 365.359   8
   0  20  -1 3631.88 377.065  10
   0 -20   2 1010.18 242.168   7
   0  20   2 630.101 191.536  10
   0 -20  -2 1123.33 260.275   6
   0 -20   2 889.829 223.282   6
   0  20  -2 812.989 220.197  10
   0  20   2 921.164 210.015   8
   0  20   3 5540.08 449.407  10
   0  20  -3 5569.13 453.095  10
   0 -20   3 6217.61 458.995   7
   0 -20   3 6061.01 466.233   6
   0  20   3 6627.66 454.050   8
   0 -20  -3 5611.01 454.888   6
   0  20  -4 1193.19 261.203  10
   0 -20   4 1282.06 258.037   7
   0  20   4 1537.20 267.864  10
   0  20   4 1370.01 241.873   8
   0 -20  -4 1415.71 264.389   6
   0 -20   4 1090.04 269.292   6
   0 -20  -5 7800.47 539.129   6
   0 -20   5 8841.94 561.959   7
   0  20  -5 7989.25 545.447  10
   0  20   5 8261.90 539.700  10
   0  20   5 8484.74 508.000   8
   0 -20   5 8428.87 551.034   6
   0  20   6-49.7379 162.693  10
   0  20  -6 79.3830 183.361  10
   0 -20  -6 139.305 182.896   6
   0  20   6-144.870 158.812   8
   0 -20   6 133.311 195.768   7
   0 -20   7 1723.15 286.541   7
   0 -20  -7 1963.56 295.402   6
   0  20   7 1782.89 291.927  10
   0  20   7 2053.76 253.642   8
   0  20  -7 1801.39 290.569  10
   0  20  -8 3674.85 383.016  10
   0  20   8 4452.30 360.796   8
   0 -20   8 3985.85 398.415   7
   0 -20  -8 3671.39 378.205   6
   0  20   8 3834.92 372.205  10
   0  20   9 1676.27 251.951   8
   0 -20   9 1193.26 263.872   7
   0 -20  -9 1093.49 239.472   6
   0  20  -9 1462.72 282.246  10
   0  20   9 1186.09 252.708  10
   0  20  10 329.684 142.523   8
   0 -20 -10 364.936 196.452   6
   0  20 -10 371.233 200.205  10
   0 -20  10 214.418 185.017   7
   0  20  10-117.093 197.991  10
   0  20  11 3414.48 367.414  10
   0 -20  11 3821.98 412.250   7
   0  20 -11 4073.26 423.880  10
   0  20  11 3835.29 334.155   8
   0 -20 -11 3197.83 355.434   6
   0 -20 -12 648.875 237.750   6
   0  20 -12 821.103 242.637  10
   0 -20  12 607.851 226.854   7
   0  20  12 721.555 193.296   8
   0  20  12 941.644 247.301  10
   0 -20  13 1453.05 291.399   7
   0  20 -13 881.918 251.831  10
   0  20  13 1264.19 285.394  10
   0  20  13 1456.64 226.105   8
   0 -20 -13 1131.69 268.208   6
   0  20  14 2705.51 352.724  10
   0  20 -14 2155.21 340.617  10
   0 -20  14 3084.52 386.450   7
   0 -20 -14 2886.77 366.499   6
   0 -20  15 99.5635 202.848   7
   0  20  15 95.3632 239.075  10
   0  20 -15-21.4904 199.632  10
   0 -20 -15 284.772 213.165   6
   0 -20  16 8316.52 600.781   7
   0  20 -16 7757.53 582.752  10
   0  20  16 7923.14 569.760  10
   0 -20 -16 7789.46 570.398   6
   0 -20 -17 416.542 223.702   6
   0  20 -17-103.454 240.997  10
   0 -20  17-132.584 201.636   7
   0  20  17 143.251 207.804  10
   0 -20 -18 322.045 178.344   6
   0  20  18 664.982 251.729  10
   0 -20  18 137.736 203.520   7
   0  20 -18 486.964 248.375  10
   0 -20  19-336.549 233.337   7
   0 -20 -19-13.8798 174.159   6
   0  20 -19-35.6047 210.155  10
   0  20  19-54.2284 196.433  10
   0  20  20 382.695 223.467  10
   0  20 -20 746.776 259.624  10
   0 -20  20 597.230 268.305   7
   0 -20 -20 215.926 204.888   6
   0  20 -21 1706.58 358.415  10
   0  20  21 872.407 269.414  10
   0 -20 -21 1386.46 280.180   6
   0 -20  21 1702.78 338.019   7
   0  20 -22 2036.50 366.379  10
   0 -20 -22 1692.69 316.268   6
   0  20  22 1741.31 324.013  10
   0 -20  22 2453.54 398.712   7
   0 -20  23 1916.65 351.142   7
   0  20 -23 1819.33 368.796  10
   0  20  23 1602.88 329.946  10
   0 -20 -23 1802.54 328.659   6
   0 -20 -24 1679.37 322.873   6
   0 -21   0 160.268 179.012   7
   0 -21   0 524.876 214.827   6
   0  21   0 47.8424 167.813   8
   0  21   0 243.693 186.572  10
   0  21   1 5599.92 467.307  10
   0 -21  -1 5717.26 468.650   6
   0  21   1 5856.78 458.676   8
   0 -21   1 5509.88 454.490   6
   0  21  -1 5620.41 462.065  10
   0 -21   1 5751.87 462.350   7
   0  21   2 114.211 153.931   8
   0 -21   2 120.227 177.489   6
   0 -21  -2 219.717 201.887   6
   0  21   2 214.138 200.402  10
   0  21  -2 27.8679 189.185  10
   0 -21   2-23.8987 182.900   7
   0  21  -3 5299.53 458.280  10
   0 -21   3 5415.09 455.701   7
   0 -21  -3 5129.27 453.706   6
   0 -21   3 5290.68 446.228   6
   0  21   3 5336.00 427.513   8
   0  21   3 5193.46 454.773  10
   0  21   4 15896.9 739.193   8
   0  21  -4 16144.2 792.390  10
   0  21   4 15755.7 770.454  10
   0 -21   4 15128.6 765.737   6
   0 -21  -4 15002.0 769.978   6
   0 -21   4 16625.3 785.678   7
   0 -21  -5 141.662 187.122   6
   0 -21   5 357.263 193.146   7
   0  21   5-70.2846 182.164  10
   0  21  -5-38.9933 178.176  10
   0  21   5 31.3510 159.529   8
   0  21   6 84.5851 142.441   8
   0 -21  -6-177.769 194.681   6
   0  21  -6 170.778 195.911  10
   0  21   6-51.4834 182.096  10
   0  21  -7 749.644 225.332  10
   0  21   7 1082.28 212.100   8
   0  21   7 334.406 195.980  10
   0 -21  -7 313.477 223.520   6
   0 -21   7 1020.77 260.272   7
   0  21  -8 13.1312 193.483  10
   0 -21  -8-193.429 176.700   6
   0 -21   8 73.2717 183.359   7
   0  21   8 21.7319 143.580   8
   0  21   8 420.886 219.561  10
   0 -21   9 3156.82 378.966   7
   0 -21  -9 3263.52 382.227   6
   0  21  -9 3103.50 379.060  10
   0  21   9 3086.66 381.278  10
   0  21   9 3263.75 333.193   8
   0 -21 -10 5006.33 455.026   6
   0 -21  10 5043.54 460.725   7
   0  21 -10 6291.28 524.507  10
   0  21  10 5150.96 405.972   8
   0  21  10 4958.20 443.402  10
   0 -21  11 71.3164 204.892   7
   0  21  11 223.486 156.014   8
   0 -21 -11 193.323 186.422   6
   0  21  11 361.064 221.461  10
   0  21 -11 49.7352 196.317  10
   0  21  12 11420.4 680.211  10
   0 -21 -12 11338.1 684.973   6
   0 -21  12 11918.7 696.448   7
   0  21 -12 11123.7 686.849  10
   0  21  13 1106.27 260.970  10
   0 -21  13 586.937 223.685   7
   0 -21 -13 1203.23 276.975   6
   0  21 -13 1439.74 309.858  10
   0  21 -14 1360.02 311.856  10
   0 -21  14 1405.09 292.865   7
   0  21  14 1553.70 291.916  10
   0 -21 -14 1697.84 311.394   6
   0  21  15 10429.7 670.369  10
   0 -21  15 11932.5 722.076   7
   0  21 -15 11169.6 721.777  10
   0 -21 -15 11287.5 695.419   6
   0  21  16-221.432 198.077  10
   0  21 -16-2.30371 222.190  10
   0 -21 -16-220.495 194.365   6
   0 -21  16 2.98389 223.138   7
   0 -21  17 2191.34 349.575   7
   0  21  17 1838.50 323.195  10
   0  21 -17 1944.22 343.857  10
   0 -21 -17 2410.81 358.587   6
   0 -21 -18 154.241 171.897   6
   0  21  18 0.24839 195.408  10
   0 -21  18 394.820 229.325   7
   0  21 -18 52.3922 215.547  10
   0  21  19 5241.79 507.296  10
   0 -21 -19 5496.20 506.507   6
   0 -21  19 4700.52 493.023   7
   0  21 -19 5857.71 539.681  10
   0  21 -20 430.515 277.454  10
   0 -21 -20 359.954 249.208   6
   0  21  20-161.421 211.580  10
   0 -21  20 266.061 235.559   7
   0 -21 -21 10670.4 711.431   6
   0 -21  21 12202.9 778.482   7
   0  21  21 11912.6 746.753  10
   0  21 -21 11206.9 758.462  10
   0 -21 -22 2163.36 354.907   6
   0 -22   0 6048.24 492.379   7
   0 -22   0 6850.99 525.470   6
   0  22   0 5902.44 496.053  10
   0 -22   1 8165.19 560.897   7
   0 -22  -1 9073.80 586.269   7
   0  22   1 7363.36 546.163  10
   0 -22   1 7714.96 558.268   6
   0  22  -1 7000.82 534.516  10
   0  22   1 7925.39 540.983   8
   0 -22  -1 8056.87 568.946   6
   0 -22   2 405.248 199.898   6
   0  22   2 1045.58 249.429   8
   0  22   2 999.231 271.093  10
   0  22  -2 1059.04 273.382  10
   0 -22  -2 479.612 213.583   6
   0 -22   2 989.582 266.700   7
   0 -22   3 1773.06 307.314   6
   0  22  -3 2193.77 329.901  10
   0  22   3 1892.16 277.861   8
   0 -22  -3 2211.75 328.642   6
   0  22   3 1896.27 298.836  10
   0 -22   3 1762.19 297.280   7
   0 -22   4 1632.26 308.715   6
   0  22   4 1491.27 262.099   8
   0 -22  -4 2019.18 321.542   6
   0  22  -4 1812.90 305.885  10
   0 -22   4 1717.38 299.720   7
   0  22   4 1943.12 317.180  10
   0  22  -5 535.047 244.356  10
   0 -22   5 307.577 201.198   7
   0  22   5 300.810 201.718  10
   0  22   5 257.091 179.176   8
   0 -22  -5 143.596 199.079   6
   0 -22  -6 225.048 179.310   6
   0  22   6 116.048 147.459   8
   0  22   6-77.6854 204.791  10
   0  22  -6 599.259 257.467  10
   0 -22   6 461.667 226.620   7
   0 -22  -7 6368.66 515.161   6
   0  22  -7 6945.48 547.532  10
   0  22   7 6069.85 498.508  10
   0 -22   7 6617.89 518.065   7
   0  22   7 7371.55 497.205   8
   0  22  -8 741.074 267.121  10
   0  22   8 272.252 157.059   8
   0 -22  -8 664.917 265.956   6
   0  22   8 182.710 202.097  10
   0 -22   8 435.679 223.046   7
   0 -22   9 8985.46 616.442   7
   0 -22  -9 9714.79 641.674   6
   0  22  -9 9623.13 641.888  10
   0  22   9 8000.79 594.636  10
   0  22   9 9602.05 569.382   8
   0 -22  10 8892.60 616.769   7
   0  22  10 10199.0 649.675  10
   0 -22 -10 9149.22 627.544   6
   0  22 -10 10307.0 657.266  10
   0 -22 -11 343.479 230.065   6
   0  22  11 245.819 246.472  10
   0 -22  11 14.2398 185.479   7
   0  22 -11 81.5534 206.865  10
   0  22 -12 363.544 255.787  10
   0 -22  12 74.2007 212.196   7
   0 -22 -12 151.070 207.007   6
   0  22  12 19.9310 198.922  10
   0 -22  13 3087.00 398.387   7
   0 -22 -13 1977.93 335.759   6
   0  22  13 3463.90 418.191  10
   0  22 -13 3255.57 407.715  10
   0 -22 -14 3441.10 413.062   6
   0  22  14 3735.62 426.167  10
   0  22 -14 3399.07 416.966  10
   0 -22  14 2946.28 384.179   7
   0  22  15 1986.26 336.576  10
   0 -22 -15 1867.49 330.508   6
   0  22 -15 2294.84 377.637  10
   0 -22  15 2460.91 379.871   7
   0  22 -16 173.731 240.209  10
   0 -22 -16 198.895 206.127   6
   0 -22  16 476.137 263.806   7
   0  22  16 408.337 263.025  10
   0  22 -17-397.151 279.276  10
   0 -22  17 126.980 197.271   7
   0 -22 -17-28.1966 182.409   6
   0  22  17-40.2127 212.729  10
   0  22 -18 210.482 238.517  10
   0 -22  18-200.637 263.118   7
   0  22  18 95.3623 208.220  10
   0 -22 -18-133.584 218.658   6
   0 -22  19 579.461 279.423   7
   0  22 -19 1105.32 291.343  10
   0  22  19 461.975 248.033  10
   0 -22 -19 1188.79 289.906   6
   0 -22 -20 1668.07 313.276   6
   0 -23   0 126.765 211.311   7
   0  23   0 4.40637 234.569  10
   0 -23   0-1.87524 177.449   6
   0 -23  -1 526.005 256.155   6
   0 -23   1 317.246 191.322   7
   0 -23   1 411.017 220.412   6
   0  23   1 61.0690 244.588  10
   0 -23  -1 640.725 243.619   7
   0  23  -1 266.429 245.833  10
   0 -23   2 21129.5 965.214   6
   0 -23  -2 22325.1 994.323   6
   0 -23  -2 23069.5 979.815   7
   0  23   2 22979.2 993.964  10
   0  23  -2 23254.5 1011.09  10
   0  23   2 21598.1 935.528   8
   0 -23   2 22567.6 979.916   7
   0  23   3 1563.87 280.863   8
   0  23   3 2041.36 317.868  10
   0  23  -3 1447.61 329.435  10
   0 -23  -3 1752.09 319.544   6
   0 -23   3 1490.02 301.019   6
   0 -23   3 1788.77 320.440   7
   0  23  -4 4706.84 461.758  10
   0  23   4 4062.47 421.577  10
   0 -23   4 4662.13 451.825   7
   0  23   4 4070.33 401.626   8
   0 -23  -4 4603.72 456.305   6
   0  23   5 659.746 246.148  10
   0 -23   5 871.656 260.676   7
   0 -23  -5 908.788 258.358   6
   0  23   5 682.231 209.225   8
   0  23  -5 431.692 235.322  10
   0  23   6-210.346 200.780  10
   0 -23  -6 94.4322 177.082   6
   0  23  -6 123.034 204.679  10
   0 -23   6-42.6256 206.315   7
   0  23   6 443.456 179.552   8
   0  23  -7 1035.60 298.738  10
   0  23   7 797.884 220.298   8
   0  23   7 527.358 246.843  10
   0 -23  -7 1173.43 285.869   6
   0 -23   7 978.612 263.688   7
   0  23  -8 4590.24 469.120  10
   0 -23  -8 4687.82 472.331   6
   0  23   8 3500.95 411.276  10
   0 -23   8 4888.44 478.185   7
   0  23  -9 912.218 296.727  10
   0  23   9 126.617 231.489  10
   0 -23   9 33.8449 210.150   7
   0 -23  -9 381.211 248.241   6
   0 -23  10 2647.56 385.009   7
   0  23  10 2041.06 341.414  10
   0 -23 -10 1981.76 346.800   6
   0  23 -10 2367.19 378.951  10
   0  23 -11 84.1009 193.586  10
   0 -23 -11 18.6009 179.612   6
   0 -23  11 54.7823 226.386   7
   0  23  11 78.4175 188.377  10
   0 -23 -12 2260.28 351.493   6
   0  23  12 2447.70 355.198  10
   0  23 -12 1796.95 333.739  10
   0 -23  12 1309.16 289.629   7
   0  23 -13-40.9613 218.525  10
   0 -23  13 209.829 236.006   7
   0  23  13 83.0275 216.482  10
   0 -23 -13 319.595 217.757   6
   0  23 -14 1655.30 331.857  10
   0 -23  14 2033.46 354.334   7
   0 -23 -14 1999.63 340.217   6
   0  23  14 1581.45 327.335  10
   0  23 -15-50.7210 206.109  10
   0  23  15-345.939 244.823  10
   0 -23 -15 70.2478 194.440   6
   0 -23  15-70.7160 191.153   7
   0  23  16 1655.75 321.778  10
   0  23 -16 1199.35 296.603  10
   0 -23 -16 1022.34 289.661   6
   0 -23  16 1157.71 309.439   7
   0 -23 -17 58.3354 195.516   6
   0  24   0 407.970 245.738  10
   0 -24   0 522.230 239.581   6
   0 -24   0 603.021 246.028   7
   0 -24  -1 2995.73 392.629   7
   0 -24   1 2567.50 369.637   7
   0 -24  -1 3478.27 406.203   6
   0  24   1 3086.43 392.549  10
   0 -24   1 3717.10 427.155   6
   0  24  -1 3197.39 402.705  10
   0 -24  -2 3586.90 423.410   6
   0  24  -2 2845.25 385.039  10
   0 -24  -2 3362.01 406.573   7
   0 -24   2 2830.71 387.504   7
   0 -24   2 3067.44 389.331   6
   0  24   2 2671.33 376.832  10
   0  24   3 1677.19 319.540  10
   0 -24   3 2207.43 345.597   6
   0  24  -3 1408.32 298.770  10
   0 -24  -3 2020.70 334.476   6
   0  24   3 1986.18 308.276   8
   0 -24   3 2145.74 335.633   7
   0  24   4 122.444 155.081   8
   0  24  -4 371.222 233.352  10
   0  24   4-80.7310 226.883  10
   0 -24  -4 644.138 237.066   6
   0 -24   4 1075.83 299.105   7
   0  24   5-69.4040 229.035  10
   0  24   5-42.7988 183.217   8
   0  24  -5 128.444 211.295  10
   0 -24   5 89.2951 194.707   7
   0 -24  -5 320.176 232.672   6
   0  24  -6 1666.98 310.571  10
   0 -24   6 1883.35 306.843   7
   0 -24  -6 1853.95 334.785   6
   0  24   6 1148.63 276.362  10
   0  24   7 286.585 216.424  10
   0  24  -7 193.831 223.086  10
   0 -24   7 786.503 268.377   7
   0 -24  -7-107.946 213.517   6
   0  24   8 4630.04 481.438  10
   0 -24   8 4615.08 471.967   7
   0  24  -8 4754.02 481.505  10
   0 -24  -8 4262.87 454.091   6
   0  24  -9 1233.65 347.801  10
   0  24   9 1874.82 349.261  10
   0 -24   9 1247.74 317.177   7
   0 -24  -9 1082.80 287.553   6
   0 -24 -10 15474.1 854.323   6
   0  24  10 15028.7 830.083  10
   0 -24  10 15722.3 858.391   7
   0  24 -10 16078.1 873.606  10
   0 -24  11 914.208 318.159   7
   0 -24 -11 575.200 279.003   6
   0  24 -11 848.201 291.743  10
   0  24  11 303.842 237.852  10
   0  24  12 998.975 347.995  10
   0 -24  12 1111.73 301.801   7
   0 -24 -12 1322.00 315.743   6
   0  24 -12 309.820 227.398  10
   0 -24  13 4930.50 497.387   7
   0 -24 -13 4869.17 495.409   6
   0 -25   0 225.179 256.414   7
   0  25   0 53.1925 292.867  10
   0 -25   0 703.413 279.067   6
   0  25   1 6870.41 575.428  10
   0 -25   1 7516.33 591.023   6
   0 -25   1 7333.74 583.500   7
   0 -25  -1 7776.42 593.721   7
   0  25  -1 7627.63 598.172  10
   0 -25  -1 8013.82 615.395   6
   0  25   2 1167.42 378.937  10
   0  25  -2 711.345 269.093  10
   0 -25   2 1402.51 317.832   6
   0 -25  -2 1441.70 320.085   6
   0 -25  -2 1343.25 328.113   7
   0 -25   2 2011.37 345.740   7
   0  25  -3 7611.46 592.361  10
   0 -25   3 6782.49 557.435   7
   0 -25  -3 8086.38 617.547   6
   0  25   3 6854.02 571.074  10
   0 -25  -3 7781.43 599.533   7
   0  25   4 10.5162 295.625  10
   0 -25  -4 253.743 241.403   7
   0 -25   4-2.83068 213.393   7
   0 -25  -4 122.069 222.611   6
   0  25  -4 52.5326 211.310  10
   0 -25   5 2542.74 369.884   7
   0  25  -5 2210.55 367.294  10
   0 -25  -5 2799.65 379.116   6
   0  25   5 2245.70 370.488  10
   0 -25   6-257.190 257.172   7
   0  25  -6 125.827 221.847  10
   0 -25  -6-266.064 206.243   6
   0  25   6 20.3664 208.730  10
   0 -25   7 1592.23 318.959   7
   0  25   7 1648.05 331.589  10
   0  25  -7 1885.93 360.907  10
   0 -25  -7 1294.17 292.385   6
   0 -25   8 71.4380 231.933   7
   1   0 -39 205.550 203.333   1
   1   0 -38 157.596 172.056   1
  -1   0  38 169.304 218.893   7
  -1   0  38 124.616 152.446   5
  -1   0  37 244.520 197.593   5
  -1   0  37 268.111 237.021   7
   1   0 -37-151.690 194.285   1
  -1   0  37 602.969 304.543  12
  -1   0  36 1152.77 286.190  12
  -1   0  36 543.839 260.155   7
   1   0 -36 429.955 169.846   1
  -1   0  35-5.06119 234.466   7
  -1   0  35 469.574 248.677  12
   1   0 -35 332.760 199.775   1
  -1   0  34 9478.80 687.258  12
  -1   0  34 9040.53 635.279   7
   1   0 -34 8555.40 583.153   1
  -1   0  33 482.012 248.645  12
   1   0 -33 591.816 211.461   1
  -1   0  33 333.464 180.773   7
  -1   0  32 9889.22 627.260   7
  -1   0  32 9141.81 647.206  12
   1   0 -32 9790.66 592.287   1
  -1   0  31 546.405 255.679  12
  -1   0  31 533.868 240.383   7
   1   0 -31 562.128 193.169   1
  -1   0  30 7274.60 527.386   7
  -1   0  30 8636.39 600.225  12
   1   0 -30 8013.24 511.121   1
  -1   0  29 199.288 189.552   7
  -1   0  29 430.796 257.067  12
   1   0 -29 709.705 192.736   1
   1   0 -28 7634.93 478.302   1
  -1   0  28 7436.16 516.810   7
  -1   0  28 7494.62 539.624  12
  -1   0  28 8403.49 443.002   2
  -1   0  27 331.592 194.712  12
  -1   0  27 799.194 178.253   2
  -1   0  27 128.848 171.032   7
   1   0 -27 330.991 157.007   1
   1   0 -26 6552.50 433.842   1
  -1   0  26 7367.63 489.190   7
  -1   0  26 6978.85 389.485   2
  -1   0  26 7743.36 520.157  12
   1   0 -25 2213.30 273.039   1
  -1   0  25 1938.56 232.726   2
  -1   0  25 2036.26 310.332   7
  -1   0  25 2731.21 364.686  12
  -1   0  24 87947.4 2148.67  12
  -1   0  24 87604.4 2086.26   7
  -1   0  24 90918.1 1920.19   2
   1   0 -24 90974.3 2029.79   1
  -1   0  23 2887.74 340.516   7
   1   0 -23 1624.72 266.227   1
  -1   0  23 2227.94 244.098   2
  -1   0  23 2113.42 323.139  12
   1   0 -22-48.5081 101.860   1
  -1   0  22 224.832 110.708   2
  -1   0  22 23.2537 137.522   7
  -1   0  22-143.718 145.494  12
  -1   0  21 60.7364 23.0304   3
  -1   0  21 132.636 103.573   2
  -1   0  21 113.013 150.496  12
   1   0 -21 88.9633 107.008   1
  -1   0  21 111.085 134.497   7
  -1   0  20 7194.89 410.191   7
  -1   0  20 6329.62 408.014  12
  -1   0  20 6574.09 323.082   2
   1   0 -20 6633.44 368.591   1
  -1   0  20 6024.94 185.544   3
  -1   0  19 67.8081 149.554  12
  -1   0  19 219.753 38.3281   3
   1   0 -19 309.812 122.641   1
  -1   0  19 108.921 104.415   2
  -1   0  19 406.907 167.562   7
   1   0 -18 12686.1 498.828   1
  -1   0  18 13480.0 322.688   3
  -1   0  18 12695.4 452.097   2
  -1   0  18 13443.5 552.506   7
  -1   0  18 12923.3 568.214  12
  -1   0  17 122.097 37.3394   3
  -1   0  17 196.835 129.433  12
  -1   0  17 86.1343 131.600   7
  -1   0  17 154.474 95.6511   2
   1   0 -17 202.877 111.758   1
  -1   0  16 4802.31 246.067   2
  -1   0  16 4758.11 318.278  12
   1   0 -16 4797.31 274.480   1
  -1   0  16 5047.22 312.247   7
  -1   0  16 4398.40 167.761   3
  -1   0  15 512.724 153.793   7
  -1   0  15 292.667 54.3873   3
  -1   0  15 319.460 166.502  12
  -1   0  15 120.316 97.5918   2
   1   0 -15 403.427 117.353   1
   1   0 -14 41898.3 973.295   1
  -1   0  14 40155.5 907.233   2
  -1   0  14 40641.6 1048.96  12
  -1   0  14 42976.2 807.145   3
  -1   0  14 39174.2 1011.82   7
  -1   0  13 280.576 59.9603   3
  -1   0  13 298.980 139.348   7
   1   0 -13 86.2572 94.0565   1
  -1   0  13 31.9961 76.5382   2
  -1   0  13 290.929 158.543  12
  -1   0  12 30559.5 714.208   2
  -1   0  12 31876.7 838.313  12
  -1   0  12 33809.6 653.369   3
  -1   0  12 32840.8 829.238   7
   1   0 -12 31646.2 766.672   1
  -1   0  11 476.678 139.860   7
  -1   0  11 190.491 52.9542   3
   1   0 -11 154.604 81.3305   1
  -1   0  11 159.582 121.508  12
  -1   0  11 47.2299 54.8144   2
  -1   0  10 63492.8 1302.55   7
  -1   0  10 62763.7 1319.48  12
  -1   0  10 64279.6 1148.86   3
  -1   0  10 60499.4 1190.31   2
   1   0 -10 63045.2 1244.99   1
   1   0  -9 105.859 62.7072   1
  -1   0   9 33.0480 48.8284   2
  -1   0   9 60.0225 65.4041  12
  -1   0   9 119.397 47.1867   3
  -1   0   9 121.786 97.2383   7
   1   0  -8 5299.52 205.841   1
  -1   0   8 5408.56 240.714  12
  -1   0   8 5434.19 175.139   3
   1   0  -8 5498.63 183.836   2
  -1   0   8 5986.48 244.102   7
  -1   0   7 85.3063 67.7454  12
   1   0  -7 35.5328 45.7216   1
   1   0  -7 32.2683 54.9848   7
   1   0  -7 90.5399 58.6007  12
   1   0  -7 35.6739 31.2267   2
  -1   0   7 2.05112 64.0336   7
  -1   0   7 4.71677 28.1221   3
  -1   0   6 29315.6 580.675   3
  -1   0   6 29001.1 643.916   7
   1   0  -6 28867.5 647.372  12
   1   0  -6 29623.8 570.691   2
   1   0  -6 29289.3 592.104   1
   1   0  -6 29454.4 648.853   7
  -1   0   6 29052.3 644.342  12
   1   0  -5 33.0995 35.8032   3
   1   0  -5 116.706 47.7057  12
  -1   0   5 45.3559 32.2449   3
  -1   0   5 25.9396 46.7765   7
  -1   0   5 65.0577 49.9065  12
   1   0  -5 46.1812 40.3715   7
  -1   0   5 51.8891 27.8702   8
  -1   0   4 14254.1 335.517  12
   1   0  -4 13791.5 313.130   3
   1   0  -4 13642.5 290.434   8
  -1   0   4 13665.3 291.285   8
  -1   0   4 14210.8 336.023   7
  -1   0   4 13461.3 313.007   3
   1   0  -4 13365.4 330.722  12
   1   0  -4 12739.9 330.240   7
   1   0  -3 10.3034 19.2642   8
   1   0  -3 19.3787 28.4590   3
  -1   0   3 7.69666 26.4337   3
  -1   0   3 3.25644 18.9527   8
   1   0  -3 44.4819 33.1513   7
   1   0  -2 23418.8 472.804   3
   1   0  -2 23102.0 453.080   7
   1   0   1 5.90457 23.6446   3
  -1   0  -1 31.5604 24.9451  11
  -1   0  -2 14986.1 326.209   1
   1   0   2 14384.0 294.504  10
   1   0   2 14921.6 327.649   3
   1   0   3 14.8990 20.6435   7
  -1   0  -3 38.6483 21.2344   7
   1   0   3-12.0897 32.8199   1
  -1   0  -3 27.3842 35.2032   1
  -1   0  -4 21922.7 445.451   7
   1   0   4 20137.8 498.521   1
   1   0   4 23096.4 448.450   7
  -1   0  -4 23565.3 502.937   1
  -1   0  -5 4.47780 49.9055   1
   1   0   5-45.8430 41.0140   7
  -1   0  -5 12.5169 33.6904   7
   1   0   5-63.4997 53.6772   1
  -1   0  -6 213.332 62.4538   1
   1   0   6 144.984 48.1713   7
  -1   0  -6 197.225 45.7621   7
   1   0   6 117.519 53.8161   1
  -1   0  -7 6.44314 63.4962   1
  -1   0  -7-2.02039 41.2762   7
   1   0   7 14.6331 47.5890   7
   1   0   7 53.6612 41.7934   1
   1   0   8 11259.1 329.518   7
  -1   0  -8 11078.4 360.867   1
  -1   0  -8 10361.4 320.067   7
  -1   0  -9 183.947 93.3532   1
   1   0   9-82.8230 63.5930   7
  -1   0  -9-14.5799 48.4042   7
  -1   0 -10 18667.5 548.441   1
   1   0  10 19576.6 517.549   7
   1   0  11 227.363 109.777   7
  -1   0 -11 476.962 153.842   1
  -1   0 -12 120789. 2334.45   1
   1   0  12 121675. 2280.42   7
   1   0  13 600.764 152.195   7
  -1   0 -13 1173.12 200.876   1
  -1   0 -14 6705.35 342.421   1
   1   0  14 7024.57 330.423   7
   1   0  15 394.391 141.967   7
  -1   0 -15 366.023 152.508   1
  -1   0 -16 40248.1 1059.59   1
   1   0  16 41333.6 1027.79   7
  -1   0 -17 761.484 183.643   1
   1   0  17 665.299 165.350   7
   1   0  18 14504.2 341.460   3
  -1   0 -18 15854.6 596.776   1
   1   0  18 16497.8 582.119   7
   1   0  19 352.067 46.2287   3
  -1   0 -19 595.616 191.738   1
   1   0  19 379.532 152.560   7
   1   0  20 15667.3 345.386   3
  -1   0 -20 17356.3 662.508   1
   1   0  20 16953.5 632.959   7
  -1   0 -21 894.651 208.283   1
   1   0  21 905.524 201.168   7
   1   0  22 19181.1 711.025   7
  -1   0 -22 18680.9 735.951   1
  -1   0 -23 231.696 161.977   1
   1   0  23 308.073 154.888   7
   1   0  24 218.815 136.815   7
  -1   0 -24 166.849 140.082   1
  -1   0 -25 204.965 158.773   1
   1   0  25 125.983 150.240   7
   1   0  25 142.679 125.097   2
   1   0  26 5117.89 397.137   7
  -1   0 -26 5620.40 421.135   1
   1   0  26 5108.34 377.583   2
   1   0  27 160.534 168.411   7
  -1   0 -27 131.761 166.119   1
   1   0  27 110.393 142.876   2
   1   0  28-86.8617 153.085   2
   1   0  28-101.301 161.958   7
  -1   0 -28 131.707 172.174   1
   1   0  29-153.039 185.224   7
   1   0  29-187.406 154.620   2
  -1   0 -29 36.5230 161.582   1
   1   0  30 629.807 186.315   2
  -1   0 -30 487.738 196.655   1
   1   0  30 588.163 208.746   7
   1   0  30 456.055 223.094  12
  -1   0 -31 355.583 184.215   1
   1   0  31 434.600 213.551   7
   1   0  31 348.853 246.927  12
   1   0  31 468.388 206.671   2
  -1   0 -32 10559.4 649.132   1
   1   0  32 10145.6 620.984   7
   1   0  32 10519.7 602.539   2
   1   0  32 11226.5 741.957  12
  -1   0 -33 264.820 186.930   1
   1   0  33 445.407 214.406   7
   1   0  33-81.6631 229.435  12
  -1   0 -34 63.4685 187.372   1
   1   0  34 51.9479 176.849   7
   1   0  34 35.6504 236.455  12
   1   0  35 847.528 319.167  12
   1   0  35 664.769 246.662   7
  -1   0 -35 141.649 197.195   1
   1   0  36 22942.0 1118.46  12
  -1   0 -36 18455.1 938.664   1
   1   0  36 19453.5 937.081   7
  -1   0 -37 441.919 195.543   1
   1   0  37 573.955 257.088   7
   1   0  37-167.808 290.653  12
   1   0  38 92.0981 201.413   7
   1  -1 -39 3483.42 405.668   1
   1   1 -39 3248.30 392.379   1
  -1  -1  38 1001.80 295.981   7
   1  -1 -38 69.5737 178.816   1
   1   1 -38 766.049 232.720   1
  -1   1  38 514.765 268.917   7
   1   1 -37 5946.65 502.788   1
  -1   1  37 5586.35 527.306   7
  -1   1  37 5962.29 484.976   5
  -1  -1  37 5366.85 519.425   7
  -1   1  37 6656.94 619.286  12
   1  -1 -37 5608.54 500.877   1
  -1  -1  37 5730.16 582.098  12
  -1   1  36 18767.9 1000.24  12
   1  -1 -36 17837.4 874.301   1
   1   1 -36 17842.2 872.832   1
  -1  -1  36 16774.6 902.577   7
  -1   1  36 17505.1 829.065   5
  -1  -1  36 18370.5 983.726  12
  -1   1  36 17699.8 922.685   7
  -1  -1  35 11176.6 760.711  12
   1   1 -35 10738.1 661.534   1
  -1   1  35 11836.4 661.956   5
  -1  -1  35 11535.0 727.020   7
  -1   1  35 11715.8 772.857  12
  -1   1  35 11753.5 731.993   7
   1  -1 -35 11923.4 697.427   1
  -1  -1  34 3067.28 406.858   7
  -1   1  34 2986.54 339.256   5
   1   1 -34 2753.04 336.490   1
   1  -1 -34 3292.17 375.363   1
  -1   1  34 3433.05 445.532  12
  -1  -1  34 2788.53 405.914  12
  -1   1  34 3001.12 386.626   7
   1  -1 -33 2926.98 344.483   1
   1   1 -33 2929.32 346.945   1
  -1   1  33 2439.63 336.043   7
  -1  -1  33 2232.60 346.231  12
  -1   1  33 2618.97 383.546  12
  -1  -1  33 2444.25 355.192   7
  -1  -1  32 1839.10 321.833   7
  -1   1  32 2367.48 363.400  12
  -1   1  32 2013.10 308.691   7
  -1  -1  32 1691.98 324.503  12
   1  -1 -32 1515.11 261.769   1
   1   1 -32 1463.90 258.521   1
  -1  -1  31 293.992 197.581  12
  -1   1  31 250.767 199.111   7
   1   1 -31 300.757 171.412   1
  -1  -1  31-37.6610 197.026   7
   1  -1 -31 312.569 184.982   1
  -1   1  31 358.642 229.166  12
   1  -1 -30 1555.13 259.518   1
  -1   1  30 1720.82 319.075  12
  -1   1  30 1505.33 287.766   7
  -1  -1  30 2304.15 325.243   7
   1   1 -30 1699.09 257.578   1
  -1  -1  30 1659.43 322.583  12
  -1   1  29 12042.0 660.401   7
  -1  -1  29 11980.9 692.652  12
   1  -1 -29 11567.2 618.040   1
  -1  -1  29 12429.1 678.248   7
  -1   1  29 12157.8 698.905  12
   1   1 -29 12475.2 625.927   1
   1   1 -28 9479.36 535.655   1
   1  -1 -28 8691.48 525.760   1
  -1  -1  28 10286.9 632.422  12
  -1   1  28 9579.77 611.672  12
  -1  -1  28 8846.78 569.085   7
  -1   1  28 8714.00 554.587   7
  -1   1  28 9023.24 452.042   2
  -1   1  27 7407.64 535.528  12
   1  -1 -27 7603.20 474.114   1
  -1   1  27 7976.74 412.992   2
  -1  -1  27 7279.69 504.247   7
   1   1 -27 7194.46 458.467   1
  -1   1  27 7578.46 506.162   7
  -1  -1  27 7026.69 513.119  12
  -1   1  26 5388.47 447.536  12
  -1  -1  26 5648.22 431.569   7
  -1  -1  26 5738.75 371.646   2
  -1  -1  26 5887.04 468.209  12
  -1   1  26 5523.39 432.371   7
  -1   1  26 5717.40 340.656   2
   1   1 -26 5747.20 391.622   1
   1  -1 -26 5145.30 381.528   1
  -1   1  25 701.493 223.002  12
  -1   1  25 771.841 148.452   2
   1   1 -25 448.697 153.609   1
   1  -1 -25 557.430 177.309   1
  -1  -1  25 648.173 202.947   7
  -1  -1  25 897.363 228.026  12
  -1   1  25 802.544 205.233   7
  -1  -1  25 652.148 155.984   2
  -1  -1  24 672.285 213.118  12
  -1   1  24 1026.98 228.233   7
  -1  -1  24 1036.46 229.662   7
  -1   1  24 919.589 221.731  12
   1   1 -24 851.655 168.319   1
   1  -1 -24 1040.44 193.193   1
  -1   1  24 1283.77 169.479   2
  -1  -1  24 783.256 171.042   2
  -1  -1  23 418.423 135.743   2
  -1  -1  23 340.470 216.757  12
   1   1 -23 354.717 143.806   1
  -1  -1  23 437.951 185.922   7
  -1   1  23 464.958 213.152  12
  -1   1  23 485.223 139.888   2
   1  -1 -23 573.109 162.295   1
  -1   1  23 593.473 195.464   7
  -1   1  22 22167.0 796.492   7
  -1   1  22 21013.9 826.302  12
  -1  -1  22 21411.7 797.328   7
   1  -1 -22 20925.5 744.216   1
  -1  -1  22 21006.8 685.927   2
  -1  -1  22 20116.6 806.067  12
   1   1 -22 21036.3 727.823   1
  -1   1  22 21887.3 658.661   2
  -1  -1  21 11825.4 576.361  12
  -1  -1  21 10334.9 304.073   3
  -1  -1  21 10783.6 458.184   2
  -1   1  21 10728.8 422.617   2
  -1   1  21 11540.6 543.685   7
  -1   1  21 10792.5 554.144  12
   1   1 -21 10770.5 486.195   1
  -1  -1  21 10965.6 538.684   7
   1  -1 -21 10531.7 493.612   1
  -1   1  20 6521.48 402.317   7
  -1   1  20 6568.61 314.490   2
   1  -1 -20 6616.05 376.097   1
   1   1 -20 6329.13 356.614   1
  -1  -1  20 6237.66 225.093   3
  -1   1  20 6626.20 424.633  12
  -1  -1  20 6478.99 419.775  12
  -1  -1  20 6481.83 340.276   2
  -1  -1  20 6669.13 409.204   7
  -1  -1  19 12036.3 559.138  12
  -1   1  19 12524.8 567.096  12
  -1   1  19 11806.8 428.852   2
   1  -1 -19 12249.2 504.886   1
  -1  -1  19 12252.7 336.480   3
  -1  -1  19 12042.4 535.694   7
  -1  -1  19 11477.3 454.650   2
  -1   1  19 12425.9 543.191   7
   1   1 -19 11789.0 487.003   1
   1  -1 -18 5454.94 324.192   1
  -1   1  18 5402.90 272.930   2
  -1   1  18 5679.34 351.623   7
  -1   1  18 5590.07 369.073  12
  -1  -1  18 5582.67 365.311  12
   1   1 -18 5742.10 319.108   1
  -1  -1  18 5960.87 302.426   2
  -1  -1  18 5998.20 214.780   3
  -1  -1  18 5450.43 355.044   7
  -1  -1  17 1440.65 199.670  12
   1  -1 -17 1424.68 168.164   1
  -1   1  17 1325.44 205.560  12
  -1  -1  17 1541.09 105.144   3
  -1   1  17 1417.50 194.512   7
  -1  -1  17 1313.26 193.299   7
  -1   1  17 1324.60 135.380   2
   1   1 -17 1451.31 164.938   1
  -1  -1  17 1414.35 151.261   2
  -1  -1  16 4535.20 245.564   2
  -1  -1  16 4300.80 179.142   3
  -1   1  16 4155.27 297.581  12
  -1   1  16 4517.21 225.442   2
  -1  -1  16 4690.02 305.798   7
   1   1 -16 4213.94 259.682   1
  -1  -1  16 3889.13 290.619  12
  -1   1  16 4610.17 300.724   7
   1  -1 -16 4700.12 274.840   1
  -1   1  15 319.204 133.785   7
  -1  -1  15 74.2888 130.469  12
  -1  -1  15 97.3241 123.199   7
  -1  -1  15 161.296 94.7023   2
  -1   1  15 184.702 130.770  12
  -1   1  15 128.417 71.6895   2
   1   1 -15 169.702 92.4953   1
   1  -1 -15 39.4814 102.228   1
  -1   1  14 17250.2 592.703  12
  -1  -1  14 16710.7 583.387  12
  -1   1  14 16041.8 554.094   7
  -1   1  14 15729.0 448.464   2
  -1  -1  14 16526.7 562.340   7
  -1  -1  14 16528.7 493.173   2
   1  -1 -14 17239.3 533.143   1
   1   1 -14 16143.3 506.398   1
  -1   1  13 12148.1 365.245   2
  -1  -1  13 12217.6 474.349   7
   1   1 -13 13697.6 436.173   1
  -1  -1  13 12185.9 404.078   2
  -1  -1  13 11906.8 472.762  12
  -1   1  13 12318.0 483.026  12
   1  -1 -13 12384.9 436.326   1
  -1   1  13 13158.9 485.432   7
   1  -1 -12 107590. 2062.91   1
  -1   1  12 104233. 1951.41   2
  -1   1  12 111474. 2155.04  12
  -1   1  12 106431. 2109.75   7
  -1   1  12 113915. 1876.70   3
   1   1 -12 104737. 2037.49   1
  -1  -1  12 110869. 2145.53  12
  -1  -1  12 105245. 2013.32   2
  -1  -1  12 110168. 2125.16   7
  -1   1  11 18977.3 458.791   2
  -1  -1  11 18620.0 574.014  12
  -1   1  11 20143.6 579.294   7
  -1  -1  11 19469.6 508.943   2
   1  -1 -11 19020.7 535.512   1
   1   1 -11 18989.5 512.067   1
  -1   1  11 20287.9 410.712   3
  -1  -1  11 20157.2 581.704   7
  -1   1  11 19121.7 581.568  12
  -1   1  10 10263.3 383.566  12
   1  -1 -10 10927.9 351.417   1
   1   1 -10 11039.3 337.409   1
  -1   1  10 10076.8 371.473   7
  -1   1  10 10566.7 285.503   2
  -1  -1  10 10983.2 387.118   7
  -1   1  10 11157.8 261.081   3
   1   1 -10 10470.1 327.873   2
  -1  -1  10 11561.4 400.609  12
  -1  -1  10 10984.0 342.043   1
  -1  -1   9 119.376 50.1743   1
  -1  -1   9 201.606 93.9359   7
  -1  -1   9 221.811 79.2645  12
  -1   1   9 272.694 93.6520  12
   1  -1  -9 365.896 75.5553   1
  -1   1   9 212.601 43.2316   2
  -1   1   9 227.395 37.9556   3
   1   1  -9 248.559 66.4265   1
   1   1  -9 250.675 55.6749   2
  -1   1   9 261.791 91.9445   7
   1   1  -8 17512.5 431.185   2
  -1   1   8 18267.0 486.159   7
  -1  -1   8 16520.2 464.355  10
  -1  -1   8 17718.5 490.847  12
  -1  -1   8 17019.9 478.470   7
  -1   1   8 18009.3 376.260   2
   1   1  -8 17455.5 427.396   1
   1  -1  -8 17983.1 380.668   3
  -1   1   8 18899.7 499.458  12
  -1  -1   8 17907.2 437.073   1
  -1   1   7 6199.36 248.583  12
   1   1  -7 7169.03 221.039   2
  -1   1   7 6613.79 249.200   7
  -1  -1   7 7007.32 232.589   8
   1  -1  -7 6664.32 249.588   7
  -1  -1   7 6138.77 245.219  12
  -1  -1   7 6067.18 207.344   1
   1   1  -7 6303.94 249.086  12
   1  -1  -7 6587.34 183.532   3
  -1  -1   7 6313.65 236.448  10
   1   1  -7 6604.12 248.252   7
   1   1  -7 6598.79 207.179   1
  -1  -1   7 6849.53 254.607   7
   1  -1  -6 9154.32 226.340   3
  -1  -1   6 8945.76 284.054  12
  -1  -1   6 8630.98 238.136   1
   1   1  -6 9501.10 294.024  12
  -1  -1   6 8569.08 282.258   7
  -1   1   6 8728.71 280.675   7
  -1  -1   6 8917.65 272.531  10
  -1   1   6 9265.90 285.272  12
   1   1  -6 8205.28 231.540   1
   1   1  -6 8842.23 279.986   7
  -1  -1   6 8805.61 256.584   8
   1  -1  -6 8815.33 281.114   7
   1  -1  -5 1884.83 111.092  12
   1   1  -5 1670.32 108.587  12
  -1   1   5 1790.80 112.707   7
  -1  -1   5 1820.08 101.978  10
   1   1  -5 1865.08 107.314  10
  -1   1   5 1769.61 109.998  12
  -1  -1   5 1676.64 79.7594   1
   1  -1  -5 1760.48 86.2942   3
   1   1  -5 1719.45 109.434   7
  -1  -1   5 1801.60 98.5796   8
   1  -1  -5 1795.76 112.155   7
  -1  -1   5 1709.09 110.668   7
   1   1  -5 1765.70 80.3887   1
   1   1  -5 1940.88 100.186   8
   1  -1  -4 385.495 46.1924   3
  -1   1   4 459.148 58.9550   7
   1  -1  -4 391.620 52.7795   7
   1   1  -4 494.945 37.6651   1
   1   1  -4 456.041 56.1402  12
   1   1  -4 381.069 50.0075  10
   1   1  -4 397.063 52.8156   7
   1  -1  -4 388.230 51.2278  12
  -1  -1   4 437.616 36.4941   1
   1   1  -4 350.261 45.7256   8
  -1   1   4 515.542 59.6050  12
  -1  -1   4 351.650 58.6035   7
  -1  -1   4 348.331 44.2645   8
  -1  -1   4 424.909 53.2563  10
  -1   1   4 349.546 55.7259   5
  -1   1   4 432.074 33.4142   9
  -1   1   3 3416.58 122.670  12
  -1  -1   3 3533.20 118.877  10
   1  -1  -3 3381.41 133.340   5
   1   1  -3 3694.17 121.909  10
   1   1  -3 3427.04 128.595   7
   1   1  -3 3628.42 123.704   8
  -1  -1   3 3675.73 133.945   7
  -1   1   3 3703.24 136.217   4
   1  -1  -3 3492.93 132.226   7
  -1  -1   3 3617.33 124.088   8
   1  -1  -3 3600.19 124.822  12
  -1   1   3 3665.55 104.493   9
   1  -1  -3 3414.77 100.667   9
  -1  -1   3 3272.69 136.173   3
   1  -1  -2 227.586 40.2458   4
   1  -1  -2 214.046 28.8987   9
   1   1  -2 261.607 35.1762   7
   1  -1  -2 181.436 36.7612   5
  -1  -1   2 224.672 28.4602  10
   1   1  -2 277.707 30.4587  10
  -1  -1   2 215.950 33.1209   8
   1  -1  -1 112289. 1944.54   5
   1  -1  -1 115056. 1948.90   4
  -1   1   0 65842.0 1140.57  11
   1  -1   0 64142.5 1128.15   5
   1   1   0 61425.2 1154.05   3
   1  -1   0 65519.5 1141.76   4
  -1   1  -1 17635.2 378.507  11
  -1   1  -1 17853.7 367.932   1
  -1  -1  -1 16618.4 375.077   8
  -1  -1  -1 18698.3 353.512  11
   1   1   1 19503.9 393.983   9
   1  -1   1 17853.5 338.871  10
   1   1   1 16493.8 378.613   3
   1   1   1 17783.5 341.849   4
  -1  -1  -2 7347.80 201.944   1
   1  -1   2 7728.17 205.845   1
   1  -1   2 7640.61 172.904   7
  -1  -1  -2 7753.68 211.236   8
   1   1   2 7204.47 198.038   3
  -1   1  -2 7416.38 200.356   1
   1   1   2 7292.20 202.472   1
   1  -1   2 7332.75 179.002  10
  -1  -1  -2 6942.53 203.262   9
   1   1   3 11116.0 273.676   9
   1  -1   3 9166.96 243.909  10
  -1   1  -3 10232.1 246.750  10
   1   1   3 9896.68 269.422   1
   1  -1   3 10260.0 269.745   1
   1   1   3 9456.57 262.422   8
   1   1   3 10452.7 250.895   3
  -1   1  -3 10031.6 267.449   1
  -1  -1  -3 10532.5 215.339   6
  -1  -1  -3 10288.8 269.671   1
   1  -1   3 10342.6 234.547   7
  -1  -1  -3 9770.05 246.544   3
  -1  -1  -3 9986.96 218.711   7
  -1   1  -3 10129.6 233.082   7
   1   1   3 10024.3 216.622   7
  -1  -1  -4 15300.5 384.415   1
  -1  -1  -4 14915.3 328.407   7
  -1   1  -4 15746.1 360.699  10
   1  -1   4 15347.1 340.676   7
  -1   1  -4 15310.9 340.352   7
  -1   1  -4 14828.1 376.208   1
   1   1   4 15646.9 339.209   3
   1   1   4 15243.4 327.118   7
   1  -1   4 15416.1 355.978  10
  -1  -1  -4 15459.1 337.843   3
   1   1   4 15484.2 385.669   1
   1  -1   4 15761.5 382.806   1
  -1  -1  -5 61782.7 1191.07   1
   1   1   5 62603.5 1119.10   7
  -1  -1  -5 61590.8 1126.26   7
  -1   1  -5 62170.0 1134.35   7
   1   1   5 63556.6 1194.24   1
   1  -1   5 62137.6 1135.21   7
   1   1   5 60803.7 1105.39   3
  -1   1  -5 62128.7 1162.33  10
   1  -1   5 64004.8 1187.71   1
  -1   1  -5 61037.8 1181.05   1
   1  -1   5 60989.2 1153.30  10
   1  -1   6 11791.0 358.282   1
  -1   1  -6 12263.9 323.416   7
   1   1   6 12415.0 314.594   7
  -1  -1  -6 12243.8 318.237   7
   1   1   6 12691.3 367.153   1
  -1   1  -6 12587.9 359.312   1
   1  -1   6 12253.4 339.380  10
  -1   1  -6 12479.3 343.221  10
   1   1   6 12633.9 286.139   3
   1  -1   6 12192.7 323.897   7
  -1  -1  -6 12054.5 364.543   1
  -1   1  -7 99110.1 1859.02   1
  -1  -1  -7 102913. 1880.55   1
  -1   1  -7 100181. 1812.67   7
  -1  -1  -7 100875. 1807.17   7
   1  -1   7 99848.6 1837.24  10
   1   1   7 100027. 1733.43   3
   1  -1   7 100249. 1814.37   7
   1   1   7 100626. 1800.05   7
  -1   1  -8 29781.8 659.573   7
   1   1   8 28887.1 568.704   3
   1  -1   8 29638.0 661.978   7
  -1  -1  -8 28640.2 706.718   1
   1   1   8 30602.2 656.829   7
  -1  -1  -8 29774.1 656.561   7
  -1   1  -8 28334.4 694.863   1
  -1   1  -9 4958.46 217.488   7
   1   1   9 4927.89 216.712   7
  -1  -1  -9 5039.48 249.230   1
   1  -1   9 4807.13 216.738   7
   1   1   9 5036.89 152.289   3
  -1  -1  -9 4762.81 210.556   7
  -1   1  -9 5129.62 249.130   1
   1   1  10 4649.90 220.964   7
  -1  -1 -10 4213.75 242.166   1
   1   1  10 4387.73 140.978   3
   1  -1  10 4624.75 225.271   7
  -1   1 -10 4226.34 241.298   1
   1   1  11 33919.2 643.870   3
  -1   1 -11 35316.5 848.807   1
  -1  -1 -11 30858.9 844.163   1
   1  -1  11 33998.9 807.926   7
   1   1  11 35161.3 800.476   7
  -1   1 -12 14174.2 490.056   1
   1   1  12 14816.0 463.317   7
   1   1  12 13850.7 313.405   3
   1  -1  12 14442.2 464.319   7
  -1  -1 -12 15288.2 514.977   1
   1  -1  13 14669.6 490.652   7
  -1   1 -13 14204.0 507.000   1
   1   1  13 15390.4 491.460   7
  -1  -1 -13 15438.5 531.490   1
   1   1  13 14849.3 323.822   3
  -1  -1 -14 2425.12 219.344   1
   1   1  14 2529.24 199.822   7
   1  -1  14 2667.59 207.035   7
  -1   1 -14 2273.51 206.750   1
   1   1  14 2447.22 98.7929   3
  -1   1 -15 3053.31 243.872   1
   1  -1  15 2281.07 199.505   7
   1   1  15 2533.11 98.7787   3
  -1  -1 -15 2548.76 225.828   1
   1   1  15 2847.99 216.749   7
   1  -1  16 12874.8 480.571   7
  -1   1 -16 12920.5 501.309   1
  -1  -1 -16 12891.9 509.021   1
   1   1  16 13426.8 483.299   7
   1   1  17 117.687 24.8431   3
  -1   1 -17 340.967 137.664   1
   1   1  17 276.413 125.670   7
   1  -1  17 384.220 126.989   7
  -1  -1 -17 128.075 121.307   1
   1  -1  18 317.592 132.039   7
  -1  -1 -18 171.625 115.880   1
   1   1  18 75.5548 104.636   7
  -1   1 -18 160.056 114.200   1
  -1   1 -19 1312.39 196.015   1
   1   1  19 1302.46 183.558   7
   1  -1  19 1231.42 188.670   7
  -1  -1 -19 1491.85 218.580   1
  -1  -1 -20 367.803 137.966   1
  -1   1 -20-15.1083 128.699   1
   1  -1  20-27.7823 129.063   7
   1   1  20 37.8867 108.806   7
   1   1  21 20.0621 118.938   7
  -1   1 -21 39.6541 136.659   1
  -1  -1 -21 16.2786 116.320   1
   1  -1  21-45.1261 119.238   7
  -1  -1 -22 166.029 124.555   1
  -1   1 -22 365.675 161.704   1
   1  -1  22 244.340 151.333   7
   1  -1  22 54.5816 118.447   2
   1   1  22-33.0346 122.672   7
   1  -1  23 3516.34 312.380   2
  -1  -1 -23 3399.70 329.264   1
   1   1  23 2965.52 298.733   7
   1  -1  23 2980.78 308.515   7
  -1   1 -23 3233.37 319.232   1
   1   1  24 26431.6 909.596   7
  -1   1 -24 28084.8 959.631   1
   1  -1  24 27290.2 918.161   7
  -1  -1 -24 25363.6 931.587   1
   1  -1  24 27559.1 933.587   2
   1   1  25 1643.12 251.174   7
  -1  -1 -25 1536.91 257.508   1
   1  -1  25 1536.38 249.029   2
  -1   1 -25 1595.80 250.544   1
   1  -1  25 1779.97 258.040   7
  -1  -1 -26 1382.96 246.385   1
  -1   1 -26 1329.97 244.862   1
   1  -1  26 1409.45 240.288   7
   1  -1  26 1009.48 215.389   2
   1   1  26 1261.63 242.865   7
   1   1  27 6171.37 418.580   2
  -1  -1 -27 5464.35 431.116   1
   1  -1  27 5673.62 426.172   7
  -1   1 -27 5483.46 422.728   1
   1   1  27 5490.62 415.105   7
   1  -1  27 6724.04 449.563   2
   1  -1  28 5467.94 424.236   7
  -1   1 -28 4054.15 368.715   1
   1  -1  28 4553.35 443.264  12
  -1  -1 -28 4554.89 406.875   1
   1   1  28 4398.72 387.490   7
   1   1  28 4468.21 374.396   2
   1  -1  28 4583.60 383.765   2
  -1   1 -29 637.675 210.507   1
   1   1  29 873.846 222.051   2
   1  -1  29 934.529 227.583   2
  -1  -1 -29 749.753 236.811   1
   1  -1  29 732.988 227.921   7
   1   1  29 833.063 204.857   7
   1  -1  29 872.417 258.373  12
   1  -1  30 6739.23 492.686   7
   1  -1  30 7189.56 488.473   2
  -1   1 -30 6838.37 498.904   1
   1   1  30 5949.67 466.760   7
   1  -1  30 6245.27 524.943  12
   1   1  30 6721.43 466.792   2
  -1  -1 -30 7130.12 517.799   1
   1   1  31 413.598 192.800   7
  -1  -1 -31 511.101 224.325   1
   1  -1  31 844.776 216.644   2
   1   1  31 732.835 250.986  12
   1  -1  31 591.922 236.871   7
  -1   1 -31 467.900 186.247   1
   1  -1  31 692.107 258.824  12
   1   1  31 945.247 221.664   2
   1   1  32 5982.21 479.709   7
  -1  -1 -32 5916.80 498.059   1
   1   1  32 5855.24 538.378  12
   1  -1  32 5894.25 456.789   2
   1  -1  32 5633.12 472.279   7
  -1   1 -32 5919.73 491.586   1
   1  -1  32 5997.73 533.475  12
  -1   1 -33 269.678 180.379   1
  -1  -1 -33 988.510 245.022   1
   1   1  33 379.809 192.260  12
   1  -1  33 696.908 239.244   7
   1  -1  33 710.178 227.618   2
   1  -1  33 606.434 247.633  12
   1   1  33 820.533 218.591   7
  -1  -1 -34 3133.22 379.925   1
   1  -1  34 3520.96 393.677   7
  -1   1 -34 3533.32 399.838   1
   1   1  34 3353.96 369.004   7
   1   1  34 2997.52 410.121  12
   1  -1  34 3620.49 438.937  12
   1  -1  35 705.365 266.388   7
   1   1  35 351.609 235.593  12
   1   1  35-41.1355 208.913   7
  -1   1 -35 164.981 179.660   1
   1  -1  35-4.10332 204.435  12
  -1  -1 -35 99.0096 173.227   1
  -1   1 -36 1641.17 310.188   1
   1   1  36 2001.63 363.113  12
  -1  -1 -36 1698.87 275.739   1
   1  -1  36 2442.16 406.740  12
   1  -1  36 1932.06 322.180   7
   1   1  36 1772.99 326.075   7
   1  -1  37 1824.75 327.282   7
   1   1  37 1494.76 334.340  12
   1   1  37 2211.12 341.712   7
  -1  -1 -37 2203.65 347.223   1
   1  -1  37 1589.58 372.228  12
  -1   1 -37 1762.03 320.951   1
   1  -1  38 484.909 235.560   7
   1   2 -39 445.963 198.536   1
   1  -2 -39 725.649 215.346   1
   1  -2 -38 7607.12 585.183   1
  -1  -2  38 7671.81 626.626   7
   1   2 -38 7632.76 574.685   1
   1   2 -37 208.720 160.687   1
   1  -2 -37 752.323 241.302   1
  -1   2  37 595.995 209.448   5
  -1  -2  37 102.441 228.551  12
  -1  -2  37 508.801 265.272   7
  -1   2  37 678.709 283.240  12
  -1  -2  36 2265.76 363.376   7
  -1   2  36 1657.19 267.594   5
   1   2 -36 1178.97 246.555   1
  -1   2  36 1233.38 338.600  12
   1  -2 -36 1732.10 302.833   1
  -1  -2  36 977.465 303.320  12
   1   2 -35 3275.50 372.839   1
   1  -2 -35 2903.13 356.657   1
  -1  -2  35 2667.41 377.525   7
  -1   2  35 2553.57 361.399   7
  -1  -2  35 2726.50 392.268  12
  -1   2  35 3218.08 349.335   5
  -1   2  35 3174.89 437.018  12
  -1  -2  34 5035.75 477.841   7
  -1  -2  34 5277.80 526.091  12
   1  -2 -34 4885.63 445.093   1
  -1   2  34 5267.06 432.669   5
   1   2 -34 4110.13 413.072   1
  -1   2  34 5198.98 519.166  12
  -1   2  34 4780.11 471.622   7
  -1   2  33 1277.84 239.253   5
   1   2 -33 529.978 200.359   1
  -1  -2  33 1761.74 349.278  12
  -1   2  33 1357.67 302.040   7
   1  -2 -33 1001.61 232.867   1
  -1  -2  33 996.389 256.225   7
  -1   2  33 1582.53 328.061  12
   1   2 -32 5336.40 446.553   1
  -1   2  32 5816.39 499.717   7
  -1  -2  32 5316.98 486.164   7
  -1  -2  32 5857.17 532.960  12
   1  -2 -32 5767.59 469.971   1
  -1   2  32 6060.28 450.775   5
  -1   2  32 6516.12 551.672  12
  -1   2  31 22089.6 944.602   7
  -1  -2  31 23364.3 1013.73  12
  -1   2  31 21311.8 991.052  12
  -1  -2  31 21459.2 949.107   7
   1  -2 -31 22429.2 907.072   1
  -1   2  31 21189.4 853.762   5
   1   2 -31 19997.3 856.294   1
  -1  -2  30 5543.67 502.321  12
   1   2 -30 5891.70 442.144   1
  -1   2  30 5883.88 480.858   7
  -1   2  30 6032.21 516.165  12
  -1   2  30 5469.50 416.154   5
  -1  -2  30 5142.23 464.926   7
   1  -2 -30 5875.01 455.985   1
  -1  -2  29 11612.3 664.185   7
   1   2 -29 13108.3 641.566   1
  -1   2  29 12273.3 673.125   7
  -1  -2  29 12618.5 713.183  12
   1  -2 -29 12397.0 636.492   1
  -1   2  29 12442.9 710.550  12
  -1   2  28 1044.00 254.311   7
  -1   2  28 644.217 241.779  12
  -1  -2  28 838.906 239.490   7
   1  -2 -28 1033.96 221.328   1
  -1  -2  28 1101.29 276.771  12
   1   2 -28 687.796 176.713   1
   1   2 -27 1147.29 199.690   1
  -1   2  27 1488.45 261.582   7
  -1  -2  27 1563.60 270.584   7
  -1  -2  27 1837.47 308.055  12
   1  -2 -27 1558.64 240.349   1
  -1   2  27 1666.21 282.217  12
  -1   2  27 1865.76 200.322   2
  -1   2  26 4777.72 403.799   7
   1   2 -26 3729.77 319.142   1
  -1  -2  26 4358.56 406.247  12
   1  -2 -26 3690.58 330.918   1
  -1  -2  26 3920.49 375.435   7
  -1   2  26 4536.46 412.418  12
  -1   2  26 4137.87 280.881   2
  -1   2  25 12811.3 626.923   7
  -1   2  25 13077.6 671.585  12
  -1  -2  25 12403.7 630.912   7
  -1  -2  25 11397.9 629.073  12
  -1   2  25 12717.7 492.792   2
   1  -2 -25 12153.3 584.121   1
   1   2 -25 12361.7 575.136   1
  -1   2  24 1286.84 240.211   7
  -1  -2  24 1025.80 227.045   7
   1   2 -24 1550.99 225.236   1
  -1  -2  24 710.742 225.770  12
  -1   2  24 1261.24 167.615   2
   1  -2 -24 1208.58 210.133   1
  -1   2  24 1422.66 242.977  12
  -1   2  23 8521.91 488.282   7
  -1  -2  23 8480.43 485.120   7
  -1  -2  23 8894.00 436.838   2
  -1  -2  23 9270.43 531.873  12
  -1   2  23 7636.77 501.990  12
   1   2 -23 7901.78 433.910   1
   1  -2 -23 8384.24 463.351   1
  -1   2  23 9387.43 395.012   2
  -1   2  22 1824.08 250.872  12
  -1  -2  22 1408.33 234.012  12
   1  -2 -22 1413.51 200.922   1
  -1  -2  22 1878.53 211.854   2
  -1   2  22 1663.19 246.470   7
  -1   2  22 1578.69 162.685   2
   1   2 -22 1755.10 214.282   1
  -1  -2  22 1304.88 229.115   7
  -1  -2  21 83.8704 96.3666   2
  -1   2  21 10.4175 130.295   7
   1   2 -21 146.357 109.409   1
  -1  -2  21 35.5560 132.032   7
   1  -2 -21-160.116 121.121   1
  -1   2  21 5.24829 141.123  12
  -1  -2  21-25.6355 127.019  12
  -1   2  21 148.928 90.8728   2
  -1  -2  20 207.681 141.704  12
   1   2 -20 190.136 113.742   1
  -1   2  20-15.3069 161.484  12
  -1  -2  20 137.678 129.342   7
  -1   2  20 141.486 75.0923   2
  -1  -2  20 135.991 101.360   2
  -1   2  20 101.977 120.057   7
   1  -2 -20 151.070 96.4200   1
   1  -2 -19 202.079 121.509   1
  -1   2  19 150.509 123.347   7
  -1  -2  19 16.9046 119.831   7
  -1  -2  19 112.009 123.973  12
  -1   2  19 56.2090 132.518  12
   1   2 -19 153.465 105.227   1
  -1   2  19 57.8796 76.2270   2
  -1  -2  19 151.823 102.555   2
   1  -2 -18 7305.06 379.357   1
  -1   2  18 6768.26 386.461   7
  -1   2  18 6369.90 389.744  12
  -1   2  18 7358.29 301.704   2
  -1  -2  18 6720.58 343.060   2
  -1  -2  18 6666.93 397.102  12
  -1  -2  18 6777.38 396.155   7
   1   2 -18 7073.84 355.938   1
   1  -2 -17 8269.84 396.797   1
  -1  -2  17 8764.36 431.000   7
  -1  -2  17 7988.49 364.017   2
   1   2 -17 8719.38 379.404   1
  -1   2  17 8343.15 412.768   7
  -1  -2  17 7548.16 418.177  12
  -1   2  17 8648.09 318.160   2
  -1   2  17 7892.55 424.633  12
  -1   2  16 162.876 68.4411   2
  -1  -2  16-71.9813 97.4540  12
   1  -2 -16 8.82207 81.9578   1
   1   2 -16 201.442 103.983   1
  -1  -2  16 7.33839 118.937   7
  -1  -2  16 268.253 107.029   2
  -1   2  16 246.977 125.544   7
  -1   2  15 1252.15 178.527   7
   1  -2 -15 985.841 148.767   1
   1   2 -15 1243.49 149.503   1
  -1  -2  15 1086.55 181.792  12
  -1   2  15 1046.18 106.854   2
  -1  -2  15 1243.99 179.816   7
  -1  -2  15 1160.57 150.550   2
   1   2 -14 20085.1 583.907   1
  -1  -2  14 20672.3 591.033   2
   1  -2 -14 21017.1 617.990   1
  -1   2  14 20439.3 638.334   7
  -1  -2  14 21001.8 651.393   7
  -1  -2  14 20152.9 655.277  12
  -1   2  14 20098.9 506.020   2
   1   2 -13 768.142 117.640   1
   1  -2 -13 1019.53 129.498   1
  -1  -2  13 922.400 145.766   7
  -1   2  13 1170.71 98.6089   2
  -1  -2  13 1255.55 173.000  12
  -1   2  13 1036.04 163.035   7
   1   2 -12 14822.0 444.039   1
   1  -2 -12 14835.0 467.315   1
  -1  -2  12 14077.5 500.770  12
  -1  -2  12 14606.9 500.564   7
  -1   2  12 14316.9 370.906   2
  -1   2  12 14345.5 487.184   7
  -1   2  11 47718.6 1057.64   7
  -1  -2  11 46098.9 1062.03   7
   1   2 -11 47654.2 989.059   1
  -1   2  11 46260.7 890.821   2
  -1  -2  11 46340.4 1064.82  12
  -1  -2  10 2344.62 177.924   7
  -1   2  10 2416.83 107.179   2
   1  -2 -10 2354.79 97.1720   3
  -1  -2  10 2249.23 175.435  12
  -1  -2  10 2429.46 145.020   1
   1   2 -10 2478.78 151.324   1
   1   2 -10 2415.95 153.579   2
  -1   2  10 2144.77 171.927   7
   1   2  -9 346.690 83.9815  10
   1   2  -9 338.346 68.9423   1
  -1   2   9 354.174 46.4134   2
   1   2  -9 383.310 67.8961   2
  -1  -2   9 143.803 76.9386   7
  -1   2   9 393.387 93.2264   7
  -1  -2   9 296.519 89.0876  12
  -1  -2   9 385.708 63.2730   1
   1  -2  -9 429.293 43.5547   3
   1   2  -8 53177.8 1074.87   2
  -1  -2   8 52151.4 1114.16  12
   1   2  -8 54944.8 1042.17   1
  -1   2   8 53110.7 1108.69   7
  -1   2   8 52940.7 1087.15   5
  -1  -2   8 52310.7 1114.63   7
  -1  -2   8 54182.1 1049.78   1
   1   2  -8 53327.4 1108.17  10
   1  -2  -8 56152.5 983.518   3
  -1  -2   8 57412.7 1103.17   8
  -1  -2   7 55385.3 1080.72  10
   1   2  -7 55275.9 1109.35  12
  -1   2   7 53052.4 1088.92  12
  -1  -2   7 53950.5 1094.69   7
  -1  -2   7 56201.8 1104.49  12
   1  -2  -7 54340.9 985.150   3
  -1   2   7 54179.5 1075.87   5
   1   2  -7 53885.6 1091.30   7
   1   2  -7 53520.5 1017.14   1
  -1  -2   7 53849.3 1023.32   1
  -1   2   7 54183.8 1090.66   7
  -1  -2   7 54516.9 1075.45   8
   1   2  -7 53707.2 1086.01  10
   1   2  -7 55753.5 1068.81   2
   1  -2  -7 53376.1 1090.22   7
   1   2  -6 1648.61 117.544  12
   1  -2  -6 1418.16 105.290   7
   1   2  -6 1482.44 82.5276   1
  -1  -2   6 1655.38 122.104   7
  -1   2   6 1318.07 108.221  12
  -1  -2   6 1523.07 104.507  10
  -1   2   6 1663.03 114.488   5
   1   2  -6 1677.63 116.128   7
  -1  -2   6 1348.36 82.3425   1
   1   2  -6 1511.00 110.284  10
  -1  -2   6 1598.93 107.981   8
   1   2  -5 75139.7 1339.90  10
  -1  -2   5 70714.2 1328.07  10
   1   2  -5 72412.9 1271.73   1
   1  -2  -5 73544.8 1346.48   5
  -1   2   5 73007.8 1346.00   5
  -1  -2   5 72637.3 1350.17   7
  -1   2   5 73939.9 1339.11  12
   1   2  -5 75353.7 1364.75  12
   1  -2  -5 71402.3 1351.38   7
   1   2  -5 71364.0 1346.70   7
  -1  -2   5 72068.3 1277.41   1
  -1  -2   5 73778.2 1342.84   8
   1   2  -5 70355.7 1334.60   8
   1  -2  -4 30393.1 617.814   5
  -1  -2   4 28011.2 590.137  10
  -1   2   4 28892.6 610.751   5
  -1  -2   4 30087.4 611.267   7
  -1   2   4 29061.3 589.155  12
   1   2  -4 29409.2 609.216   7
  -1   2   4 28852.0 606.059   4
   1   2  -4 29897.8 598.920  10
  -1  -2   4 29968.7 611.235   8
   1   2  -4 29077.4 605.965   8
  -1  -2   4 29100.3 544.786   1
   1   2  -3 16441.8 360.879  10
   1   2  -3 16159.7 367.845   7
   1   2  -3 16700.8 378.025   8
  -1  -2   3 17674.0 384.004   8
  -1   2   3 16044.1 372.972   4
   1  -2  -3 16359.3 381.182   5
   1  -2  -3 15855.8 369.745   4
  -1   2   3 17156.1 346.978  12
  -1  -2   3 16319.9 369.951   7
  -1   2   3 15881.0 376.527   5
  -1  -2   3 14571.9 352.353  10
   1  -2  -2 88114.4 1456.33  12
   1   2  -2 86601.5 1489.25   7
  -1  -2   2 82592.5 1486.50   7
  -1  -2   2 87733.6 1515.91   8
  -1   2   2 88384.3 1515.71   5
   1   2  -2 80231.4 1504.62   8
   1   2  -2 85725.1 1479.29  10
   1  -2  -2 87341.9 1510.91   4
  -1   2   2 85828.4 1510.04   4
   1  -2  -2 86411.1 1517.68   5
  -1  -2   2 81320.8 1474.61  10
   1   2  -1 72544.0 1345.79   8
  -1   2   1 76020.5 1346.01  11
   1  -2  -1 77180.2 1348.36  11
   1  -2  -1 77653.3 1351.84   4
   1   2  -1 77916.8 1315.32   7
  -1  -2   1 74880.8 1310.57  10
   1  -2  -1 75773.5 1353.66   5
  -1   2   1 77402.9 1353.26   4
   1  -2  -1 77163.5 1333.60   6
   1   2  -1 78278.3 1314.92  10
  -1  -2   1 73263.8 1349.94   8
  -1  -2   1 74032.8 1315.03   7
  -1  -2   0 134422. 2186.22   7
   1  -2   0 133400. 2205.66   6
  -1  -2   0 130728. 2195.79  10
   1  -2   0 127119. 2232.43  11
  -1  -2   0 136114. 2218.47   6
   1  -2   0 129328. 2203.58  10
   1   2   0 129549. 2236.91   8
   1   2   0 133230. 2194.66  10
  -1  -2   0 126302. 2237.23   8
  -1   2   0 126894. 2230.13  11
   1   2   0 130363. 2217.14   6
  -1   2   0 127200. 2207.33   6
  -1  -2  -1 22898.3 498.790   8
   1   2   1 22883.3 502.889   9
  -1   2  -1 24580.0 473.291  10
  -1   2  -1 24020.1 498.745  11
  -1   2  -1 24017.6 462.777   6
   1   2   1 24363.5 502.869   8
   1  -2   1 24013.4 498.648  11
   1  -2   1 24420.8 462.322   6
  -1  -2  -1 24458.8 472.898   6
   1  -2   1 23026.3 471.443  10
   1   2   1 23840.1 471.805   6
   1  -2   2 35970.7 699.006   1
  -1   2  -2 36018.1 674.484  10
  -1  -2  -2 35468.9 660.633   6
  -1  -2  -2 37589.9 709.155   8
  -1  -2  -2 34910.8 696.664   9
   1   2   2 35492.2 701.080   8
   1  -2   2 36239.1 647.415   6
   1  -2   2 35618.6 673.660  10
  -1  -2  -2 34111.1 694.691   3
  -1   2  -2 35540.7 648.965   6
   1   2   2 34310.0 696.155   9
   1   2   2 37171.2 666.471   6
   1  -2   2 34597.3 697.456  11
  -1   2  -3 4729.20 169.834   1
  -1  -2  -3 4801.95 142.987   6
   1   2   3 4636.17 140.912   6
  -1   2  -3 4546.30 131.950   6
  -1   2  -3 4732.32 156.862  10
   1  -2   3 4597.65 156.936  10
  -1  -2  -3 4778.37 171.112   8
   1   2   3 4606.27 164.824   9
   1   2   3 4908.83 172.993   8
   1  -2   3 4698.79 151.564   7
  -1  -2  -3 4511.32 155.704   3
   1  -2   3 4583.68 172.939   1
  -1  -2  -3 3950.33 155.543   9
  -1   2  -3 4284.36 151.046   7
  -1  -2  -4 419.848 61.3069   8
  -1  -2  -4 416.865 51.5769   3
   1  -2   4 380.956 61.1159   1
  -1  -2  -4 397.945 57.8997   9
  -1   2  -4 330.527 58.6468  10
   1  -2   4 389.025 54.4799  10
  -1  -2  -4 351.460 46.8443   6
  -1   2  -4 392.375 64.6682   1
  -1   2  -4 374.716 41.7585   6
  -1  -2  -4 407.590 47.0583   7
   1  -2   4 383.398 54.2679   7
   1   2   4 335.391 51.8014   9
   1   2   4 372.332 59.4404   8
  -1   2  -4 372.899 52.8708   7
  -1   2  -5 6217.43 203.653   7
   1   2   5 7204.74 231.844   8
   1   2   5 5415.77 196.822   9
   1  -2   5 6275.80 205.158   7
  -1   2  -5 6384.23 215.519  10
  -1   2  -5 6032.33 224.268   1
   1  -2   5 6454.39 215.233  10
  -1  -2  -5 6119.96 233.763   1
  -1  -2  -5 6440.63 192.956   7
   1  -2   5 6395.93 228.803   1
  -1  -2  -5 6331.54 186.768   6
  -1  -2  -5 5863.60 180.571   3
  -1  -2  -6 2396.33 119.809   7
   1  -2   6 2467.69 131.964   7
  -1  -2  -6 2296.04 99.9999   3
   1   2   6 2528.28 127.127   9
  -1   2  -6 2235.29 138.742   1
   1   2   6 2443.43 137.804   8
  -1   2  -6 2269.94 123.752   7
   1  -2   6 2189.35 130.525  10
  -1   2  -6 2337.82 140.046  10
   1  -2   6 2361.95 138.664   1
  -1  -2  -6 2312.97 150.744   1
  -1  -2  -7 237.025 68.1401   1
  -1  -2  -7 222.268 36.1581   3
  -1   2  -7 219.674 54.9454   7
   1   2   7 246.126 50.1081   9
  -1   2  -7 147.062 69.0049   1
   1  -2   7 273.403 65.2375  10
  -1  -2  -7 215.150 54.2938   7
   1   2   7 265.509 62.6334   7
   1  -2   7 136.459 52.2310   7
  -1   2  -7 187.326 64.1263  10
  -1  -2  -8 7957.89 307.148   1
  -1   2  -8 6810.89 284.771   1
  -1   2  -8 7450.07 266.329   7
   1  -2   8 7618.63 270.093   7
  -1   2  -8 7117.34 279.192  10
  -1  -2  -8 7522.30 257.650   7
   1   2   8 7631.86 259.244   7
  -1   2  -9 915.483 117.792   1
  -1   2  -9 880.590 104.538  10
   1  -2   9 1064.34 106.673   7
   1   2   9 1023.42 103.110   7
  -1  -2  -9 967.957 124.378   1
  -1  -2  -9 1104.66 105.051   7
  -1   2 -10 43550.5 990.478   1
   1  -2  10 44414.0 958.485   7
  -1  -2 -10 41901.5 994.448   1
   1   2  10 44326.1 938.931   7
  -1   2 -11 104236. 2004.95   1
   1   2  11 103055. 1941.76   7
  -1  -2 -11 104362. 2024.68   1
   1  -2  11 99663.6 1958.72   7
  -1   2 -12 11355.8 436.022   1
  -1  -2 -12 11405.8 448.282   1
   1  -2  12 10006.3 383.028   7
   1   2  12 10519.3 386.485   7
  -1  -2 -13 45244.8 1090.95   1
   1  -2  13 44758.9 1035.59   7
   1   2  13 42852.4 1005.91   7
  -1   2 -13 45168.2 1068.22   1
  -1  -2 -14 369.152 147.877   1
   1  -2  14 404.158 103.777   7
   1   2  14 805.547 138.082   7
  -1   2 -14 833.504 156.198   1
  -1   2 -15 5484.14 312.607   1
   1   2  15 4960.84 277.245   7
   1  -2  15 4824.55 289.241   7
  -1  -2 -15 5093.80 314.525   1
  -1  -2 -16 918.999 201.797   1
  -1   2 -16 1210.17 207.523   1
   1  -2  16 806.670 141.892   7
   1   2  16 889.166 178.685   7
  -1   2 -17 49593.1 1220.26   1
   1   2  17 47705.8 1169.54   7
   1  -2  17 48639.0 1193.57   7
  -1  -2 -17 48574.6 1238.37   1
  -1   2 -18 6538.73 391.952   1
   1   2  18 6229.41 361.662   7
  -1  -2 -18 5762.02 380.424   1
   1  -2  18 5466.16 354.853   7
   1   2  19 24710.8 777.762   7
  -1   2 -19 24316.7 811.624   1
   1  -2  19 27029.0 841.028   2
   1  -2  19 25072.0 798.919   7
  -1  -2 -19 25264.4 835.755   1
   1   2  20 7347.34 411.520   7
   1  -2  20 7724.79 429.600   2
  -1   2 -20 6967.58 420.892   1
  -1  -2 -20 6562.65 405.605   1
   1  -2  20 7126.79 409.788   7
  -1  -2 -21 1420.06 210.651   1
   1  -2  21 1300.71 202.953   7
   1  -2  21 1798.93 231.184   2
  -1   2 -21 1838.54 227.602   1
   1   2  21 1492.86 204.954   7
   1  -2  22 278.766 161.539   7
   1  -2  22 271.589 152.619   2
  -1  -2 -22 253.413 149.709   1
   1   2  22 229.885 140.468   7
  -1   2 -22 124.045 120.930   1
  -1  -2 -23 10709.5 561.618   1
   1  -2  23 12775.0 584.357   2
   1  -2  23 11657.5 561.556   7
  -1   2 -23 11196.1 570.037   1
   1   2  23 11983.4 560.482   7
   1   2  24 543.051 181.723   7
  -1  -2 -24 475.990 186.936   1
   1  -2  24 530.732 179.636   2
  -1   2 -24 458.290 173.299   1
   1  -2  24 570.089 186.396   7
   1  -2  25 1072.88 217.911   7
  -1   2 -25 743.063 195.663   1
   1   2  25 889.141 204.190   7
  -1  -2 -25 976.503 211.977   1
   1  -2  25 838.230 185.136   2
   1   2  26 6074.30 422.048   7
  -1  -2 -26 6304.94 447.330   1
  -1   2 -26 5599.35 419.547   1
   1  -2  26 5949.31 427.601   7
   1  -2  26 6033.84 476.033  12
   1  -2  26 6478.88 445.043   2
  -1   2 -27 1280.23 233.220   1
   1  -2  27 857.258 245.865  12
   1  -2  27 1069.65 222.099   7
   1  -2  27 1035.41 224.959   2
   1   2  27 1414.11 238.680   7
  -1  -2 -27 1118.94 229.154   1
   1   2  28 1151.32 209.987   2
  -1   2 -28 1022.84 221.505   1
   1  -2  28 1166.09 251.296   7
   1   2  28 1227.79 238.819   7
   1  -2  28 1704.56 310.255  12
  -1  -2 -28 1304.49 247.916   1
   1  -2  28 1351.41 244.135   2
   1  -2  29 10381.4 591.422   2
  -1  -2 -29 9328.83 591.406   1
   1   2  29 10768.4 568.977   2
  -1   2 -29 10423.2 609.552   1
   1   2  29 9460.08 574.623   7
   1  -2  29 10449.6 595.143   7
   1  -2  29 9901.49 642.068  12
   1  -2  30 1562.63 266.323   2
   1  -2  30 1504.02 292.211  12
   1   2  30 1431.80 252.105   7
   1   2  30 1568.62 239.435   2
  -1   2 -30 1307.07 251.261   1
   1  -2  30 1350.49 275.093   7
  -1  -2 -30 922.617 239.492   1
   1  -2  31 3108.38 388.395  12
   1   2  31 3287.76 336.370   2
  -1  -2 -31 2994.00 360.105   1
  -1   2 -31 2933.80 336.656   1
   1   2  31 2346.15 314.783   7
   1  -2  31 3236.55 368.238   7
   1  -2  31 3431.99 358.981   2
   1  -2  32 98.2482 193.407  12
  -1   2 -32 179.676 176.647   1
   1   2  32-29.2561 177.923   7
   1  -2  32 214.940 199.307   7
   1  -2  32 472.094 205.011   2
  -1  -2 -32 368.237 207.502   1
  -1   2 -33-112.981 179.632   1
   1   2  33-140.119 249.547  12
   1  -2  33 201.521 182.991   2
  -1  -2 -33 130.959 193.076   1
   1  -2  33 556.090 267.785  12
   1   2  33 76.2834 168.157   7
   1  -2  33-123.146 190.532   7
   1  -2  34 1068.89 251.520   2
   1  -2  34 838.052 296.001  12
  -1  -2 -34 1023.34 266.878   1
   1  -2  34 1196.49 261.069   7
  -1   2 -34 860.715 249.845   1
   1   2  34 479.082 228.735   7
   1   2  34 1021.37 294.607  12
  -1  -2 -35 12021.9 747.754   1
   1  -2  35 12752.9 811.314  12
   1   2  35 12851.9 833.034  12
  -1   2 -35 12380.8 741.631   1
   1  -2  35 11944.5 720.326   7
  -1   2 -36 4028.10 454.197   1
   1  -2  36 4446.21 520.485  12
  -1  -2 -36 5146.74 513.779   1
   1  -2  36 5152.99 490.621   7
   1   2  36 3848.63 483.415  12
   1  -2  37 4424.79 518.898  12
  -1  -2 -37 3863.11 450.826   1
   1  -2  37 4300.55 463.991   7
  -1   2 -37 3412.88 402.985   1
   1   2  38 7703.61 576.541   8
   1  -2  38 8898.84 652.227   7
   1   2  39 6440.36 537.884   8
   1   3 -39 2651.92 355.408   1
   1  -3 -39 2500.53 363.642   1
   1   3 -38 1874.27 315.764   1
   1  -3 -38 2325.65 346.609   1
   1   3 -37 361.261 187.722   1
  -1  -3  37 373.149 241.400  12
  -1   3  37 682.516 288.304  12
  -1  -3  37 1244.78 316.919   7
   1  -3 -37 750.243 244.308   1
  -1  -3  36 301.963 222.171  12
   1  -3 -36 657.054 221.875   1
  -1  -3  36-17.7469 215.330   7
  -1   3  36 301.273 182.239   5
  -1   3  36 97.7078 239.989  12
   1   3 -36 30.0924 147.676   1
  -1   3  35 1928.41 370.322  12
   1  -3 -35 1224.56 272.317   1
  -1   3  35 1280.48 248.908   5
  -1  -3  35 1277.48 318.500  12
   1   3 -35 1181.24 236.482   1
  -1  -3  35 879.984 280.510   7
  -1  -3  34 4651.37 475.883   7
   1  -3 -34 5168.22 454.529   1
   1   3 -34 4343.36 410.616   1
  -1  -3  34 4710.13 493.987  12
  -1   3  34 4967.63 511.079  12
  -1   3  34 4606.99 405.334   5
   1   3 -33 9594.55 590.929   1
  -1  -3  33 9904.82 667.298   7
  -1   3  33 10826.7 725.832  12
  -1  -3  33 12805.8 771.391  12
  -1   3  33 10387.3 593.890   5
   1  -3 -33 11151.3 658.873   1
  -1   3  32 434.142 177.084   5
   1   3 -32 405.074 178.004   1
  -1  -3  32 664.092 259.523   7
  -1   3  32 536.114 266.454  12
   1  -3 -32 513.844 195.648   1
  -1  -3  32 518.284 258.780  12
   1  -3 -31 369.023 187.410   1
  -1  -3  31 450.774 225.833   7
  -1  -3  31 1039.07 284.446  12
  -1   3  31 828.857 282.575  12
  -1   3  31 1019.29 218.969   5
   1   3 -31 598.134 187.836   1
  -1   3  30 4571.26 370.958   5
   1   3 -30 4353.01 372.571   1
  -1  -3  30 4563.47 443.094  12
  -1  -3  30 4314.75 426.081   7
  -1   3  30 5079.50 459.018  12
   1  -3 -30 4439.87 399.294   1
  -1   3  30 4318.15 413.529   7
  -1   3  29 1751.18 254.333   5
   1   3 -29 282.400 163.712   1
  -1   3  29 566.328 205.771   7
  -1  -3  29 644.400 232.456   7
  -1  -3  29 915.978 273.161  12
  -1   3  29 848.604 228.861  12
   1  -3 -29 1070.77 231.632   1
  -1  -3  28 627.371 220.426   7
  -1   3  28 641.552 218.788  12
  -1   3  28 161.114 191.237   7
  -1  -3  28 579.616 203.458  12
  -1   3  28 490.856 166.689   5
   1  -3 -28 554.687 174.503   1
   1   3 -28 338.495 137.007   1
   1   3 -27 4811.98 372.440   1
  -1  -3  27 5006.64 443.636  12
  -1   3  27 4907.56 366.264   5
  -1   3  27 4373.16 427.128  12
   1  -3 -27 4677.37 389.354   1
  -1  -3  27 4167.59 388.835   7
  -1   3  27 4920.15 409.675   7
   1   3 -26 8756.18 488.526   1
  -1  -3  26 8097.92 535.552  12
   1  -3 -26 9244.34 524.162   1
  -1   3  26 9221.77 410.103   2
  -1  -3  26 9151.87 553.618   7
  -1   3  26 9152.50 572.685  12
  -1   3  26 9538.36 502.731   5
  -1   3  26 8807.62 532.001   7
  -1   3  25 3861.10 256.916   2
  -1  -3  25 3327.17 357.131  12
   1  -3 -25 4405.97 357.416   1
   1   3 -25 3915.15 318.378   1
  -1   3  25 4133.45 367.745   7
  -1  -3  25 3928.28 373.291   7
  -1   3  25 3854.84 318.699   5
  -1   3  25 3802.30 378.346  12
  -1   3  24 709.269 220.273   7
  -1   3  24 388.728 210.600  12
  -1  -3  24 770.311 213.278  12
   1   3 -24 378.787 152.862   1
   1  -3 -24 116.571 166.490   1
  -1   3  24 551.945 126.089   2
  -1   3  24 409.790 173.258   5
  -1  -3  24 480.901 189.058   7
   1   3 -23 26479.8 852.193   1
  -1   3  23 26519.1 963.145  12
  -1   3  23 27481.3 743.166   2
  -1  -3  23 23721.9 916.057  12
   1  -3 -23 27747.0 906.213   1
  -1  -3  23 26195.9 922.145   7
  -1   3  23 26892.9 917.711   7
  -1   3  23 25912.7 835.610   5
  -1   3  22 486.481 208.440   7
  -1   3  22 440.392 115.740   2
  -1   3  22 244.710 175.768  12
   1   3 -22 226.578 124.051   1
  -1  -3  22 651.253 194.084   7
  -1   3  22 457.881 166.798   5
  -1  -3  22 965.986 224.739  12
   1  -3 -22 308.311 171.640   1
  -1  -3  21 729.821 191.861  12
  -1  -3  21 574.803 185.350   7
   1  -3 -21 409.289 140.795   1
  -1   3  21 705.682 186.470  12
  -1   3  21 527.318 138.462   5
  -1   3  21 614.232 108.524   2
   1   3 -21 459.992 127.161   1
  -1   3  21 564.857 168.252   7
  -1   3  20 71.6929 73.5373   2
  -1  -3  20 104.176 141.870   7
  -1   3  20 18.5284 105.635   5
  -1  -3  20 80.2857 156.561  12
   1   3 -20 80.7717 94.9269   1
  -1   3  20 55.8632 141.776   7
   1  -3 -20-13.5105 108.889   1
   1  -3 -19 7802.12 400.185   1
  -1  -3  19 7177.27 419.159   7
  -1   3  19 6916.65 295.853   2
   1   3 -19 7012.49 366.906   1
  -1  -3  19 7951.65 441.962  12
  -1   3  19 7505.65 418.768   7
  -1   3  19 7341.01 373.540   5
  -1  -3  18 9741.63 491.585  12
  -1   3  18 9745.69 473.613   7
  -1   3  18 9890.82 433.046   5
   1  -3 -18 10382.7 463.327   1
   1   3 -18 9399.84 419.380   1
  -1  -3  18 10447.4 494.478   7
  -1   3  18 9845.38 348.708   2
  -1   3  17 24647.6 732.700   5
  -1   3  17 25812.4 789.087   7
   1   3 -17 24280.6 724.196   1
  -1   3  17 26558.1 632.576   2
  -1  -3  17 26469.4 826.717  12
   1  -3 -17 25683.8 773.647   1
  -1  -3  17 25248.5 803.447   7
  -1  -3  16 68.9579 142.488   7
  -1  -3  16 147.052 151.536  12
   1   3 -16 99.7715 104.979   1
  -1   3  16 149.123 123.139   5
   1  -3 -16 0.09570 83.4723   1
  -1   3  16 554.961 185.048   7
  -1   3  16 281.730 89.2979   2
   1  -3 -15 30168.8 815.318   1
  -1   3  15 30171.7 841.097   7
   1   3 -15 28652.6 764.281   1
  -1  -3  15 31176.2 871.956  12
  -1   3  15 28767.7 777.303   5
  -1  -3  15 29318.1 848.260   7
   1   3 -14 11316.2 408.352   1
  -1   3  14 12069.3 473.622   7
  -1  -3  14 11525.1 471.557   7
  -1  -3  14 11815.4 482.606  12
  -1   3  14 11334.4 426.088   5
  -1   3  13 34066.6 849.817   5
  -1  -3  13 35540.2 914.360   7
  -1   3  13 35620.5 906.880   7
   1  -3 -13 36872.3 664.641   3
  -1  -3  13 33406.9 908.158  12
   1   3 -13 34766.8 831.697   1
  -1   3  12 1648.76 153.901   5
  -1  -3  12 1599.03 172.765  12
  -1  -3  12 1861.30 182.931   7
  -1   3  12 1906.07 185.385   7
   1   3 -12 1712.24 141.101   1
   1  -3 -12 1815.95 83.3581   3
   1   3 -12 1826.44 172.228  10
   1   3 -11 17479.7 485.998   1
  -1  -3  11 18702.7 561.923  12
  -1  -3  11 18062.6 554.500   7
  -1   3  11 17231.0 509.861   5
   1   3 -11 17391.3 541.511  10
   1  -3 -11 18609.5 384.427   3
   1  -3 -10 8076.07 212.950   3
  -1  -3  10 7681.73 326.813   7
  -1  -3  10 8099.13 287.733   1
   1   3 -10 7733.11 319.601  10
  -1  -3  10 8017.51 329.836  12
  -1   3  10 6912.46 297.949   5
   1   3 -10 7995.45 279.030   1
  -1  -3   9 3233.25 199.099  12
   1   3  -9 3207.67 197.316  10
  -1  -3   9 3281.77 160.852   1
  -1   3   9 2946.09 175.726   5
   1   3  -9 3230.42 159.593   1
  -1  -3   9 3526.20 206.495   7
   1   3  -8 13286.4 402.410   2
   1   3  -8 12969.6 402.923  10
  -1  -3   8 13870.9 360.122   1
  -1   3   8 12913.9 387.570   5
  -1  -3   8 14348.3 423.783  12
   1   3  -8 13264.5 350.450   1
  -1  -3   8 13466.8 416.708   7
  -1   3   7 1867.45 130.932   5
   1  -3  -7 1750.98 121.491   5
   1   3  -7 1969.36 135.096  10
  -1   3   7 1808.91 81.9756   8
  -1  -3   7 2220.21 137.124  10
  -1  -3   7 1832.40 137.395   7
  -1  -3   7 1808.36 106.140   1
  -1  -3   7 1754.90 127.452   8
   1   3  -7 1894.05 105.960   1
  -1  -3   6 13529.4 379.237   7
   1   3  -6 13566.2 381.730  12
  -1   3   6 12893.2 365.085   5
  -1   3   6 12661.8 354.088   4
   1   3  -6 12362.4 366.860   7
  -1  -3   6 12943.9 371.785   8
   1   3  -6 13606.3 379.916   8
   1   3  -6 13386.6 369.185  10
   1  -3  -6 13306.8 365.675   5
  -1  -3   6 13077.7 362.573  10
  -1  -3   6 12821.5 318.892   1
  -1   3   6 13152.3 271.443   8
   1   3  -6 12862.9 313.411   1
   1  -3  -6 13269.5 375.784   7
  -1   3   5 51551.4 1018.54   5
   1   3  -5 51326.3 1022.38   7
   1   3  -5 51790.3 1013.48  10
  -1  -3   5 51971.9 1025.49   7
  -1  -3   5 52718.1 957.460   1
   1  -3  -5 54095.3 1025.88   5
   1   3  -5 49116.2 1020.64   8
  -1  -3   5 52854.7 1012.85  10
  -1   3   5 54166.7 1010.22   4
  -1  -3   5 51222.3 1028.71   8
  -1   3   4 3974.74 157.318   4
   1   3  -4 3941.82 163.674   7
  -1  -3   4 3821.41 168.255   8
   1  -3  -4 3727.97 158.239   4
  -1   3   4 3884.70 164.919   5
   1   3  -4 3888.39 161.763  10
  -1  -3   4 3848.01 166.621   7
   1   3  -4 3628.16 168.932   8
  -1  -3   4 4009.27 160.453  10
   1  -3  -4 4051.15 168.330   5
  -1   3   3 28868.5 590.960   4
  -1  -3   3 29701.9 616.650   8
   1  -3  -3 28483.6 602.688   5
  -1   3   3 28160.2 602.345   5
  -1  -3   3 29589.1 586.797  10
  -1   3   3 28491.4 535.909   2
   1   3  -3 28054.2 583.642  10
  -1   3   3 26785.1 539.269  12
   1  -3  -3 28895.4 590.294   4
   1   3  -3 28555.0 589.210   7
   1   3  -3 26988.7 602.560   8
  -1  -3   3 27601.4 586.784   7
   1   3  -2 129945. 2279.15   7
  -1  -3   2 131838. 2282.50   7
   1   3  -2 132126. 2306.60   6
   1  -3  -2 134825. 2312.24   5
   1  -3  -2 132767. 2293.36   4
   1  -3  -2 133017. 2299.31   6
   1   3  -2 127277. 2307.90   8
  -1   3   2 134732. 2295.58   4
   1  -3  -2 134582. 2254.13   2
  -1  -3   2 134191. 2315.36   8
  -1   3   2 139799. 2294.36  11
   1   3  -2 127342. 2274.67  10
  -1  -3   2 131021. 2279.20  10
   1   3  -1 11111.5 274.624  10
  -1   3   1 10907.1 284.255   6
   1   3  -1 11512.3 299.633   8
   1  -3  -1 11309.8 278.711   2
  -1  -3   1 11295.6 271.413   7
  -1  -3   1 11476.6 294.988   6
   1  -3  -1 11227.7 246.658   8
  -1  -3   1 9917.22 290.309   8
  -1   3   1 11188.8 285.297  11
   1  -3  -1 11562.9 291.600   4
   1  -3  -1 11197.0 286.234   6
   1   3  -1 11725.5 294.731   6
   1  -3  -1 11533.7 288.567  11
  -1   3   1 11558.1 282.928  10
  -1  -3   1 11236.7 272.662  10
  -1   3   0 74798.5 1353.85   6
   1   3   0 77114.6 1365.54   6
   1  -3   0 78607.5 1367.94  11
  -1  -3   0 75094.9 1343.87  10
  -1   3   0 74038.8 1357.99  11
   1  -3   0 74107.0 1351.44   6
   1   3   0 76045.6 1380.10   8
   1  -3   0 72866.4 1372.26   2
  -1  -3   0 82962.6 1392.93   8
  -1   3   0 74928.4 1351.96  10
   1  -3   0 75119.3 1354.78  10
   1   3   0 78354.4 1346.18  10
  -1  -3   0 76991.7 1364.17   6
  -1  -3  -1 34441.4 653.656   9
  -1  -3  -1 32005.1 622.743   6
   1   3   1 31226.3 620.227   6
   1  -3   1 31407.6 619.194  10
   1   3   1 30479.2 604.824  10
   1  -3   1 31872.1 609.538   6
  -1   3  -1 31722.9 620.039  10
  -1  -3  -1 31482.9 642.729   8
  -1   3  -1 30638.2 610.149   6
   1  -3   1 30295.3 651.270   2
   1   3   1 30944.4 638.233   8
   1  -3   1 32053.0 629.981  11
   1  -3   2 30421.4 589.776   6
  -1   3  -2 31033.8 611.423  10
  -1  -3  -2 31970.5 634.142   8
   1  -3   2 30657.2 618.480  11
  -1  -3  -2 29967.1 601.213   6
   1   3   2 30636.0 627.450   8
  -1   3  -2 29808.7 591.281   6
  -1  -3  -2 27020.5 609.033   9
   1  -3   2 28486.7 649.250   2
   1   3   2 30042.4 603.103   6
   1  -3   2 29843.8 607.028  10
   1   3   3 3955.13 153.885   9
  -1   3  -3 3313.29 127.224   6
   1  -3   3 3341.78 141.634  10
  -1  -3  -3 3620.36 150.279   9
   1  -3   3 3265.95 126.446   6
   1   3   3 3274.63 132.837   6
   1   3   3 3439.61 151.926   8
   1  -3   3 3298.48 151.428   1
   1  -3   3 3482.62 144.495   7
  -1   3  -3 3337.95 145.840  10
  -1  -3  -3 3433.69 136.680   6
  -1  -3  -3 3145.98 145.682   8
  -1   3  -4 7069.93 201.325   6
  -1   3  -4 6737.72 228.022  10
   1  -3   4 6604.11 223.604  10
   1   3   4 7043.13 210.733   6
  -1  -3  -4 6979.58 232.263   8
   1  -3   4 6374.59 217.423   7
   1   3   4 6845.60 233.198   8
   1   3   4 7500.36 226.001   9
  -1  -3  -4 6780.29 158.316   5
  -1  -3  -4 7009.36 212.393   6
  -1  -3  -4 5755.53 204.329   9
  -1   3  -4 6877.77 221.736   7
   1  -3   4 6784.67 235.905   1
  -1   3  -5 1708.91 108.104   7
   1   3   5 2005.16 124.566   8
   1  -3   5 1811.73 123.645   1
   1  -3   5 1345.72 112.634  10
  -1   3  -5 1766.95 96.6198   6
  -1  -3  -5 1672.10 110.976   8
  -1  -3  -5 1883.32 110.184   9
   1  -3   5 1543.14 109.141   7
  -1   3  -5 1725.19 123.552   1
   1   3   5 1564.73 101.136   9
  -1   3  -5 1717.17 116.992  10
  -1  -3  -5 1813.11 70.8023   5
  -1  -3  -5 1670.72 98.8734   6
  -1  -3  -6 51519.0 979.513   6
   1   3   6 51312.2 900.880   5
   1   3   6 49663.8 980.953   9
   1   3   6 50961.2 1017.41   8
  -1   3  -6 50794.8 1002.82   7
  -1   3  -6 51220.8 1023.27  10
   1  -3   6 48928.5 1014.24  10
   1  -3   6 49375.0 1001.06   7
  -1   3  -6 51089.1 1033.39   1
  -1  -3  -6 50446.1 946.165   3
  -1  -3  -6 51148.6 980.989   7
   1   3   7 16850.5 454.940   8
  -1   3  -7 17164.5 465.510  10
  -1  -3  -7 17949.4 431.218   6
  -1   3  -7 16960.1 450.942   7
  -1  -3  -7 17038.4 386.206   3
   1  -3   7 17226.6 454.486   7
   1   3   7 17752.1 365.485   5
   1   3   7 16450.9 420.919   9
  -1  -3  -7 18116.9 438.369   7
  -1   3  -7 16646.2 470.086   1
  -1  -3  -8 10057.3 253.335   3
  -1   3  -8 9694.29 340.954  10
   1  -3   8 9956.56 331.002   7
  -1   3  -8 9746.35 343.653   1
  -1  -3  -8 9842.23 313.379   7
   1   3   8 9781.65 331.921   8
   1   3   8 10150.8 254.175   5
   1   3   8 10493.8 305.669   9
  -1  -3  -9 4495.17 147.652   3
   1  -3   9 4695.22 225.246   7
  -1   3  -9 4493.97 234.291   1
  -1   3  -9 4252.35 233.312  10
   1   3   9 4827.75 197.588   9
   1   3   9 4928.51 230.184   8
   1   3   9 4617.49 165.567   5
  -1  -3  -9 4554.42 248.970   1
  -1   3 -10 13579.9 451.317  10
   1   3  10 14361.3 434.299   8
   1   3  10 12506.2 377.315   9
   1   3  10 13773.6 346.678   5
  -1   3 -10 14228.0 454.610   1
  -1  -3 -10 12818.0 457.444   1
  -1  -3 -10 13701.6 306.268   3
   1  -3  10 14012.1 436.135   7
  -1   3 -11 52737.4 1176.84  10
  -1  -3 -11 54060.0 1203.60   1
   1   3  11 53251.5 1029.48   5
   1   3  11 54621.8 1126.11   7
   1  -3  11 53254.1 1149.94   7
  -1   3 -11 50579.9 1164.69   1
  -1   3 -12 4141.08 256.537   1
   1  -3  12 4075.02 239.239   7
  -1  -3 -12 4061.57 262.949   1
  -1   3 -12 4110.79 251.127  10
   1   3  12 4357.83 239.005   7
   1   3  13 8524.67 344.735   7
  -1  -3 -13 8270.42 396.939   1
   1  -3  13 8138.06 355.045   7
  -1   3 -13 7922.89 366.474   1
   1  -3  14 20862.2 636.422   7
   1   3  14 19917.8 603.364   7
  -1  -3 -14 21224.0 681.508   1
  -1   3 -14 20884.5 657.813   1
  -1  -3 -15 9381.55 438.145   1
   1   3  15 9862.96 400.023   7
  -1   3 -15 8393.25 406.248   1
   1  -3  15 9444.34 442.739   2
   1  -3  15 9017.20 399.998   7
   1   3  16 8331.73 386.711   7
  -1   3 -16 8009.08 399.092   1
  -1  -3 -16 8403.52 422.969   1
   1  -3  16 8148.86 418.220   2
   1  -3  16 8459.72 398.027   7
   1  -3  17 13030.1 546.700   2
  -1  -3 -17 12459.6 538.330   1
   1   3  17 12438.4 486.740   7
  -1   3 -17 11987.3 515.448   1
   1  -3  17 12754.3 518.290   7
   1  -3  18 2146.20 232.997   7
  -1   3 -18 1779.14 229.040   1
   1   3  18 1937.59 218.933   7
   1  -3  18 2459.69 257.554   2
  -1  -3 -18 2002.97 253.284   1
  -1   3 -19 17507.1 672.290   1
   1  -3  19 18887.2 702.501   2
   1   3  19 18825.8 649.050   7
  -1  -3 -19 18357.6 700.060   1
   1  -3  19 17741.6 661.204   7
   1  -3  20 6828.67 401.613   7
  -1   3 -20 6401.51 396.667   1
   1   3  20 6225.88 378.868   7
   1  -3  20 5712.39 398.214   2
  -1  -3 -20 5322.79 395.946   1
  -1  -3 -21 11381.6 551.778   1
   1  -3  21 11689.4 553.428   2
   1   3  21 10507.4 500.440   7
  -1   3 -21 9976.44 514.463   1
   1  -3  21 10427.2 520.783   7
   1  -3  22 11342.2 547.502   7
   1   3  22 11255.2 532.711   7
  -1  -3 -22 10767.8 555.292   1
   1  -3  22 10825.5 551.616   2
  -1   3 -22 10306.3 537.951   1
  -1  -3 -23 26757.1 944.384   1
  -1   3 -23 26785.3 921.206   1
   1  -3  23 29864.6 1017.48  12
   1  -3  23 26483.2 924.633   2
   1  -3  23 26725.9 911.590   7
   1   3  23 26439.1 882.213   7
   1  -3  24 2114.64 298.010   7
  -1  -3 -24 2521.82 313.336   1
  -1   3 -24 2952.07 333.162   1
   1  -3  24 2607.92 338.618  12
   1  -3  24 2632.82 311.118   2
   1   3  24 2381.71 298.054   7
   1   3  25 28010.6 947.846   7
   1  -3  25 27764.6 978.065   2
   1  -3  25 27473.3 958.690   7
  -1  -3 -25 25967.7 966.657   1
   1  -3  25 27213.3 1024.79  12
  -1   3 -25 27748.9 970.107   1
   1  -3  26 10740.3 582.813   7
   1   3  26 10041.8 553.930   7
   1  -3  26 10174.5 608.473  12
  -1   3 -26 9645.31 570.149   1
   1   3  26 11067.5 486.499   5
   1  -3  26 9971.05 572.808   2
  -1  -3 -26 10192.2 588.194   1
   1  -3  27 3816.69 361.005   2
   1  -3  27 3519.50 387.746  12
   1   3  27 4078.54 370.881   7
  -1  -3 -27 3374.80 361.601   1
   1  -3  27 4013.22 382.113   7
  -1   3 -27 4102.87 373.665   1
   1   3  27 3913.01 296.041   5
   1   3  28 2759.21 322.833   7
   1  -3  28 3198.94 377.218  12
  -1   3 -28 2964.82 328.666   1
   1   3  28 2690.50 261.997   5
   1  -3  28 2630.64 319.914   2
   1  -3  28 2802.29 335.201   7
  -1  -3 -28 2829.47 342.456   1
   1  -3  29 8888.50 568.626   2
   1   3  29 9321.26 469.670   5
   1  -3  29 9145.01 564.708   7
  -1   3 -29 8031.70 541.746   1
   1   3  29 9490.71 563.650   7
  -1  -3 -29 8859.47 573.333   1
   1  -3  29 8301.17 595.269  12
   1  -3  30 4343.23 409.452   2
  -1  -3 -30 4281.82 424.386   1
   1  -3  30 5134.19 481.173  12
   1  -3  30 4971.94 443.742   7
   1   3  30 5049.10 384.638   2
  -1   3 -30 4434.13 419.956   1
   1  -3  31 6355.63 539.906  12
   1  -3  31 6971.13 522.024   7
   1  -3  31 7542.60 526.739   2
  -1  -3 -31 7159.03 526.997   1
  -1   3 -31 6180.30 491.897   1
   1  -3  32 838.093 245.395   7
  -1  -3 -32 837.636 255.805   1
   1  -3  32 440.621 249.197  12
  -1   3 -32 324.529 175.207   1
   1  -3  32 881.978 260.346   2
   1  -3  33 4512.35 442.515   7
  -1  -3 -33 4732.80 453.930   1
   1  -3  33 3892.40 454.239  12
   1  -3  33 4633.55 438.012   2
  -1   3 -33 4392.09 428.910   1
  -1   3 -34 875.891 243.783   1
   1  -3  34 1098.85 263.738   7
   1  -3  34 1178.19 330.107  12
   1   3  34 1163.21 254.075   8
  -1  -3 -34 894.522 272.742   1
   1   3  34 683.151 293.328  12
   1  -3  34 1587.55 299.247   2
   1  -3  35 4575.24 502.719  12
  -1   3 -35 4373.89 455.962   1
   1   3  35 3917.15 493.799  12
   1   3  35 4316.55 413.889   8
   1  -3  35 5238.29 493.147   7
  -1  -3 -35 5146.16 505.402   1
   1   3  36 1949.90 319.256   8
   1  -3  36 2021.32 366.433  12
  -1  -3 -36 2527.52 383.729   1
   1  -3  36 1794.18 329.398   7
   1   3  36 2208.87 385.242  12
  -1   3 -36 1499.82 298.840   1
   1   3  37 372.111 191.397   8
   1  -3  37 2.66045 208.997   7
  -1   3 -37 437.619 197.012   1
   1  -3  38 1774.49 332.151   7
   1   3  38 1280.42 284.934   8
   1   3  39 666.849 251.136   8
   1   4 -39 2840.84 363.711   1
   1   4 -38 151.201 158.236   1
   1  -4 -38 99.7426 175.852   1
   1   4 -37 7425.97 555.842   1
  -1  -4  37 9362.32 679.058   7
  -1  -4  37 8136.53 664.539  12
  -1   4  37 8093.66 679.965  12
   1  -4 -37 7450.28 587.512   1
   1   4 -36 352.730 194.524   1
  -1  -4  36 37.6589 215.728   7
  -1  -4  36 621.207 297.749  12
   1  -4 -36 903.896 249.540   1
  -1   4  36 259.982 267.099  12
   1  -4 -35 4203.14 421.025   1
  -1  -4  35 4552.92 479.082   7
  -1   4  35 4621.31 400.269   5
  -1   4  35 4510.46 505.299  12
  -1  -4  35 4041.00 464.720  12
   1   4 -35 4328.01 410.155   1
   1  -4 -34 313.048 175.757   1
  -1  -4  34 474.673 269.232   7
   1   4 -34 356.600 201.264   1
  -1   4  34 493.310 190.980   5
  -1   4  34-48.1838 205.533  12
  -1  -4  34-99.2717 209.441  12
   1  -4 -33 2834.53 354.822   1
  -1  -4  33 2681.46 389.313   7
  -1  -4  33 2348.32 352.558  12
   1   4 -33 2594.17 317.608   1
  -1   4  33 3168.16 339.626   5
  -1   4  33 2373.83 369.345  12
   1   4 -32 396.112 183.475   1
   1  -4 -32 272.389 177.858   1
  -1   4  32 699.433 261.020  12
  -1  -4  32 405.971 217.345   7
  -1   4  32 144.683 133.144   5
  -1  -4  32 667.827 244.265  12
  -1   4  31 61.4500 212.805  12
  -1  -4  31 10.5415 176.347  12
  -1   4  31 67.0119 151.617   5
   1   4 -31 93.5326 143.356   1
  -1  -4  31 322.311 179.777   7
   1  -4 -31 173.154 149.780   1
  -1   4  30 7127.41 564.839  12
  -1   4  30 7756.75 477.623   5
  -1  -4  30 7771.41 570.138  12
   1  -4 -30 7137.59 506.778   1
  -1  -4  30 7336.02 541.791   7
   1   4 -30 7974.59 500.249   1
  -1   4  29 466.506 209.291  12
  -1  -4  29 477.507 213.910   7
   1  -4 -29 121.982 155.028   1
  -1  -4  29 242.897 235.039  12
   1   4 -29 87.3759 156.531   1
  -1   4  29 570.620 182.881   5
   1   4 -28 7271.64 463.945   1
  -1   4  28 7579.72 552.226  12
  -1  -4  28 7301.35 529.228  12
  -1   4  28 7719.08 469.607   5
   1  -4 -28 7519.02 498.414   1
  -1  -4  28 7491.12 525.697   7
  -1  -4  27 8746.17 574.373  12
   1   4 -27 10121.4 536.339   1
  -1   4  27 10496.2 630.480  12
  -1  -4  27 10282.6 598.815   7
  -1   4  27 9720.43 515.050   5
   1  -4 -27 9364.07 547.258   1
  -1   4  26 378.888 153.425   5
   1  -4 -26 185.831 163.532   1
  -1  -4  26 431.539 203.579  12
   1   4 -26 252.076 147.592   1
  -1  -4  26 59.0036 192.895   7
  -1   4  26 220.668 200.011  12
   1   4 -25 139.934 115.037   1
  -1   4  25-50.0401 116.505   5
  -1   4  25-242.131 195.666  12
  -1   4  25-46.7551 87.3824   2
   1  -4 -25-62.7637 130.083   1
  -1  -4  25 82.0102 166.461   7
  -1  -4  25 93.5579 164.701  12
   1  -4 -24 351.796 144.256   1
  -1   4  24 779.021 124.989   2
  -1  -4  24 794.286 206.304  12
  -1   4  24 234.590 150.801  12
   1   4 -24 550.736 146.238   1
  -1   4  24 385.590 138.414   5
  -1  -4  24 259.683 154.360   7
  -1   4  23 2402.49 185.865   2
   1   4 -23 1631.07 206.253   1
  -1  -4  23 1651.11 254.650  12
  -1   4  23 2125.33 233.318   5
   1  -4 -23 1959.01 249.920   1
  -1   4  23 1622.85 262.312  12
  -1  -4  23 2246.76 291.439   7
  -1   4  22 13338.9 554.062   5
  -1  -4  22 12779.5 625.195  12
   1   4 -22 13281.2 551.790   1
  -1  -4  22 14104.2 632.721   7
  -1   4  22 14120.1 467.632   2
   1  -4 -22 12929.0 590.023   1
  -1  -4  21 21091.5 806.700  12
  -1   4  21 22162.4 728.460   5
  -1  -4  21 22150.1 811.073   7
   1  -4 -21 21995.2 781.437   1
   1   4 -21 21939.7 727.693   1
  -1   4  21 22799.3 617.569   2
   1  -4 -20 106.891 144.751   1
  -1   4  20 307.264 91.0062   2
  -1  -4  20 91.3768 145.199  12
  -1   4  20 276.752 123.348   5
   1   4 -20 85.2328 126.259   1
  -1  -4  20 334.335 156.711   7
  -1  -4  19 222.346 136.380  12
  -1  -4  19 109.528 146.216   7
   1  -4 -19 222.055 120.951   1
  -1   4  19 129.917 66.4091   2
  -1   4  19-96.5361 108.344   5
   1   4 -19 15.4989 98.3348   1
   1   4 -18 2526.80 214.944   1
  -1  -4  18 2881.16 267.391  12
  -1  -4  18 3033.08 271.886   7
   1  -4 -18 2963.68 250.983   1
  -1   4  18 2621.16 223.220   5
   1   4 -17-70.4881 89.6930   1
  -1  -4  17 134.843 135.239  12
  -1  -4  17 89.5948 137.783   7
   1  -4 -17 179.385 112.865   1
  -1   4  17-31.9602 100.108   5
  -1  -4  16 1192.91 212.009  12
   1   4 -16 826.461 147.696   1
  -1   4  16 1085.89 167.278   5
  -1  -4  16 1199.69 197.729   7
  -1  -4  15 46160.8 1144.64  12
  -1  -4  15 44978.6 1137.33   7
   1   4 -15 44460.5 1034.68   1
  -1   4  15 44221.1 1055.30   5
  -1  -4  14 25017.7 738.068  12
   1  -4 -14 26179.6 475.294   3
   1   4 -14 24785.3 656.056   1
  -1  -4  14 25717.9 745.052   7
  -1   4  14 25311.2 680.315   5
   1   4 -14 25769.7 744.150  10
   1   4 -13 9413.09 403.029  10
  -1  -4  13 10287.2 422.494   7
   1  -4 -13 10061.4 245.321   3
  -1   4  13 9302.48 371.530   5
   1   4 -13 9675.65 357.301   1
  -1  -4  13 10195.6 422.824  12
  -1  -4  12 53206.6 1203.58   7
   1   4 -12 50584.3 1189.86  10
  -1  -4  12 57172.2 1223.81  12
   1   4 -12 51891.4 1109.17   1
  -1   4  12 51265.0 1135.65   5
  -1  -4  11 2573.35 201.158  12
   1   4 -11 2387.39 158.444   1
   1   4 -11 2483.90 194.208  10
  -1   4  11 2707.40 137.754   8
  -1  -4  11 2567.25 202.424   7
  -1   4  11 2472.50 177.489   5
  -1   4  10 1575.02 99.5033   8
  -1  -4  10 1800.38 170.091  12
   1   4 -10 1465.93 125.436   1
  -1  -4  10 1673.05 164.809   7
   1   4 -10 1642.64 152.920  10
  -1   4  10 1613.86 139.717   5
  -1   4   9 23958.3 606.193   5
   1   4  -9 23802.8 627.583  10
   1   4  -9 23775.2 561.531   1
  -1  -4   9 24021.3 567.687   1
  -1  -4   9 23538.0 634.846   7
  -1   4   9 24089.2 508.094   8
   1   4  -8 33270.6 774.437  10
  -1  -4   8 33447.2 709.195   1
  -1   4   8 32636.5 639.076   8
  -1  -4   8 32836.1 776.510   7
  -1   4   8 32874.5 750.959   5
  -1   4   7 38.6771 26.5327   8
  -1  -4   7 39.7189 35.0407   1
  -1  -4   7-12.5936 70.2754   7
  -1   4   7 7.80103 59.0534   5
   1   4  -7 37.5972 61.4912  10
   1   4  -7 70.4085 71.8127   8
  -1   4   7 54.2958 42.1598   4
   1   4  -6 98452.0 1796.63   8
   1   4  -6 97137.2 1769.59  10
  -1   4   6 94136.7 1755.24   5
  -1   4   6 96574.5 1733.42   4
  -1   4   6 95515.5 1625.90   8
  -1  -4   6 93522.4 1694.18   1
  -1  -4   6 94112.4 1770.82   7
  -1  -4   6 90878.2 1751.17  10
   1   4  -5 1288.48 116.880   8
  -1  -4   5 1116.04 107.807   7
   1   4  -5 1093.05 95.8179   7
  -1  -4   5 1124.21 102.625   8
   1   4  -5 1358.23 110.316  10
  -1   4   5 1110.67 102.839   5
  -1   4   5 1204.03 59.1573   8
   1  -4  -5 1325.52 105.776   5
   1  -4  -5 1137.96 57.6419   8
  -1  -4   5 1151.42 98.6983  10
  -1   4   5 1084.55 89.6107   4
   1  -4  -5 854.557 92.2732   4
  -1   4   4 10777.0 262.929   2
  -1  -4   4 10454.7 309.029  10
   1   4  -4 10617.4 313.491  10
  -1   4   4 10862.3 302.901   4
  -1  -4   4 10660.1 318.833   7
  -1   4   4 10683.1 319.832   5
   1   4  -4 10722.8 329.990   8
   1  -4  -4 11017.4 306.896   4
   1  -4  -4 11745.2 327.080   5
   1   4  -4 10478.7 312.526   7
  -1  -4   4 11576.9 337.260   8
   1  -4  -4 10980.7 236.682   8
   1  -4  -4 10577.8 324.868   6
  -1   4   4 11434.4 240.518   8
   1   4  -3 75537.4 1396.67   7
   1  -4  -3 77389.9 1416.68   5
   1  -4  -3 73911.7 1409.22   6
   1  -4  -3 76021.0 1306.94   8
  -1  -4   3 75953.4 1398.66   7
  -1   4   3 77326.8 1385.91   4
  -1   4   3 74758.8 1351.75   2
  -1  -4   3 77208.7 1428.19   8
   1  -4  -3 74237.3 1383.10   4
  -1   4   3 78253.3 1313.94   8
  -1  -4   3 69394.4 1382.54  10
   1   4  -3 75592.4 1418.56   6
   1   4  -3 74694.4 1394.41  10
   1   4  -3 79661.8 1434.10   8
   1   4  -2 9406.74 284.336   6
   1   4  -2 9006.55 267.961  10
  -1   4   2 8820.24 256.677   2
  -1  -4   2 9446.97 269.180  10
  -1   4   2 8918.70 268.035  10
  -1   4   2 9712.26 229.044   8
  -1  -4   2 9496.22 267.918   7
  -1  -4   2 9158.38 286.353   8
  -1   4   2 9469.30 281.381   6
   1  -4  -2 9494.26 222.379   8
   1   4  -2 9193.57 291.253   8
   1  -4  -2 9077.44 277.074   6
  -1   4   2 9819.98 267.670  11
   1  -4  -2 9296.03 267.021   4
  -1  -4   1 89865.0 1622.10  10
  -1   4   1 89448.7 1617.97  11
   1   4  -1 96137.5 1667.70   8
   1  -4  -1 91901.2 1632.40   4
   1  -4  -1 90622.8 1638.27   6
   1  -4  -1 88034.1 1582.20   8
   1   4  -1 91689.3 1649.33   6
   1  -4  -1 90778.3 1633.80  10
   1  -4  -1 91478.3 1628.55   2
   1  -4  -1 94088.3 1624.00  11
  -1  -4   1 100350. 1676.39   8
  -1  -4   1 91956.5 1648.30   6
  -1   4   1 92761.7 1642.06   6
   1   4  -1 85983.9 1617.91  10
  -1   4   1 89329.4 1629.50  10
  -1  -4   1 88109.3 1613.71   7
  -1   4   1 89140.1 1636.21   2
   1  -4   0 9281.49 262.074   6
   1  -4   0 9180.88 242.464   8
  -1  -4   0 8494.14 260.160   6
   1  -4   0 8342.79 260.169  10
   1   4   0 8716.29 263.363   6
   1  -4   0 9384.60 257.704  11
  -1   4   0 8923.30 276.878   2
  -1  -4   0 8466.24 268.375   8
   1   4   0 8196.66 266.404   8
  -1   4   0 8407.56 254.385   6
  -1   4   0 9096.91 263.817  10
  -1   4   0 9319.21 255.690  11
   1   4   0 8365.55 248.943  10
   1  -4   0 8944.52 269.319   2
  -1  -4   0 8529.47 249.312  10
   1  -4   1 4329.25 169.274  10
   1  -4   1 4119.68 163.740   6
  -1   4  -1 4455.28 167.920  11
   1   4   1 4458.49 172.560   6
   1  -4   1 4372.68 187.018   2
  -1   4  -1 4203.84 171.053  10
  -1   4  -1 4372.78 166.157   6
   1   4   1 4496.34 164.447  10
   1  -4   1 3908.25 159.093  11
  -1  -4  -1 3830.05 168.605   8
   1   4   1 4204.27 177.326   8
  -1   4  -1 4449.84 189.797   2
  -1  -4  -1 4450.11 173.820   6
   1  -4   2 770.834 73.6726  11
   1  -4   2 679.903 46.5034  12
   1   4   2 685.524 71.8467   6
  -1   4  -2 746.422 69.1954   6
   1   4   2 623.597 68.5970  10
   1  -4   2 438.864 82.3056   2
  -1   4  -2 789.180 81.0044  10
  -1  -4  -2 684.929 69.6682   6
   1   4   2 625.828 76.4907   8
  -1  -4  -2 699.032 75.9211   8
   1  -4   2 708.150 70.4353   6
   1  -4   2 681.090 71.4071  10
   1  -4   3 121932. 2130.77  10
   1  -4   3 122717. 2104.11   6
   1   4   3 124731. 2141.79   8
  -1   4  -3 123903. 2106.52   6
  -1   4  -3 122663. 2133.39  10
   1  -4   3 119828. 2056.26  12
   1  -4   3 121015. 2130.73   7
  -1  -4  -3 112250. 2126.73   8
   1   4   3 125228. 2127.81   6
  -1  -4  -3 118711. 2115.74   6
  -1  -4  -3 108288. 2105.55   9
   1  -4   3 118878. 2189.84   2
   1   4   4 17734.5 430.982   6
   1  -4   4 17761.1 416.036   6
  -1   4  -4 17156.4 443.876  10
  -1  -4  -4 16890.3 423.712   6
   1  -4   4 17305.1 452.089   1
  -1   4  -4 17800.6 416.721   6
  -1  -4  -4 17491.2 426.706   9
   1  -4   4 17522.3 441.342  10
   1  -4   4 18166.9 442.652   7
   1   4   4 17490.2 442.382   8
   1  -4   4 17229.5 489.730   2
  -1  -4  -4 17506.6 446.210   8
   1  -4   5 3211.12 164.047  10
  -1   4  -5 3655.86 153.306   6
  -1   4  -5 3268.66 164.936   7
   1   4   5 3448.13 171.343   8
  -1  -4  -5 3321.76 156.693   6
  -1   4  -5 3624.37 176.857  10
  -1  -4  -5 3556.74 167.993   8
   1   4   5 3677.45 158.308   9
   1   4   5 3289.86 156.472   6
   1  -4   5 3131.23 194.821   2
  -1  -4  -5 3226.96 116.676   5
   1  -4   5 3024.13 162.825   7
  -1  -4  -5 3362.63 152.689   9
  -1   4  -6 4680.00 185.495   6
  -1  -4  -6 4422.74 143.128   5
   1   4   6 4855.82 208.064   8
  -1   4  -6 4420.51 207.704  10
  -1  -4  -6 4727.29 192.782   6
   1  -4   6 5101.64 251.436   2
   1  -4   6 4082.88 197.562   7
  -1  -4  -6 4435.73 181.879   9
   1   4   6 4495.39 182.028   9
  -1   4  -7 3215.00 186.946   1
  -1  -4  -7 3600.60 171.350   6
   1   4   7 3479.53 125.746   5
  -1   4  -7 3066.32 153.567   6
   1   4   7 2983.35 172.753   8
  -1  -4  -7 3329.98 156.805   9
   1  -4   7 3083.13 208.963   2
   1  -4   7 3235.99 178.847   7
  -1   4  -7 3145.61 186.344  10
  -1  -4  -7 3534.43 166.358   7
   1   4   7 3790.94 167.096   9
  -1   4  -8 165.125 87.7380  10
   1   4   8 135.590 69.1594   8
  -1  -4  -8 41.4689 52.7280   6
   1   4   8 69.3428 42.0366   9
  -1  -4  -8 67.0859 47.0199   7
   1  -4   8 67.5917 69.0235   7
   1   4   8 18.0065 34.1660   5
   1  -4   8 342.726 130.263   2
  -1   4  -8 114.893 76.6400   1
   1   4   9 80259.2 1637.46   8
   1  -4   9 83924.5 1660.12   7
  -1  -4  -9 84149.2 1524.16   3
   1  -4   9 89619.2 1758.75   2
  -1  -4  -9 87173.5 1629.33   6
   1   4   9 85791.2 1528.58   5
  -1   4  -9 86112.4 1682.41   1
   1   4   9 88488.1 1596.42   9
  -1   4  -9 85896.4 1685.97  10
  -1   4 -10 14060.4 464.258  10
   1   4  10 14048.7 442.039   8
   1   4  10 14501.0 397.136   9
  -1   4 -10 13551.0 458.979   1
  -1  -4 -10 14544.7 335.702   3
   1   4  10 13707.4 356.384   5
  -1  -4 -10 13905.4 420.806   6
   1  -4  10 13860.9 449.842   7
   1  -4  10 15959.1 530.201   2
   1  -4  11 7173.04 318.718   7
  -1  -4 -11 7397.27 206.505   3
  -1   4 -11 7304.62 327.449   1
  -1   4 -11 7690.81 337.078  10
   1   4  11 7485.36 312.889   8
   1   4  11 7285.44 240.783   5
   1  -4  11 8242.25 376.686   2
   1   4  12 15332.3 402.505   5
   1  -4  12 16636.8 574.696   2
  -1   4 -12 15677.5 528.819  10
   1   4  12 14902.4 484.865   8
  -1   4 -12 15635.0 521.030   1
  -1  -4 -12 14758.8 332.520   3
   1  -4  12 15259.5 503.777   7
  -1  -4 -12 15153.2 540.500   1
   1  -4  13 18891.9 638.361   2
  -1  -4 -13 18815.8 619.393   1
   1   4  13 18289.5 558.174   8
   1  -4  13 18028.5 575.915   7
  -1   4 -13 17741.7 595.336  10
   1   4  13 17935.7 466.638   5
  -1   4 -13 17266.3 578.431   1
   1   4  14 26708.8 736.499   8
   1   4  14 26552.8 637.979   5
   1  -4  14 26251.6 753.010   7
  -1  -4 -14 25692.2 799.957   1
   1  -4  14 29226.0 832.157   2
  -1   4 -14 26160.6 769.035   1
  -1   4 -14 28335.0 799.994  10
  -1   4 -15 4828.20 309.365   1
  -1  -4 -15 5837.83 342.596   1
  -1   4 -15 5300.90 315.208  10
   1  -4  15 5540.12 346.953   2
   1   4  15 5010.34 235.568   5
   1  -4  15 4845.38 298.246   7
   1   4  15 5037.59 288.362   8
   1  -4  16 1105.05 201.074   2
  -1   4 -16 646.772 157.616   1
   1   4  16 858.647 147.488   8
   1  -4  16 845.288 161.493   7
   1   4  16 742.257 100.083   5
  -1  -4 -16 647.392 152.598   1
  -1  -4 -17 12604.5 554.752   1
   1   4  17 13273.3 430.918   5
   1  -4  17 13942.4 579.549   2
   1  -4  17 13875.2 544.804   7
  -1   4 -17 13811.6 551.688   1
  -1  -4 -18 10043.0 501.566   1
  -1   4 -18 9928.80 474.605   1
   1   4  18 10086.4 375.590   5
   1  -4  18 10029.9 495.844   2
   1  -4  18 10356.8 480.731   7
   1  -4  19 1985.37 231.966   7
   1  -4  19 2082.90 263.670   2
   1  -4  19 2209.21 262.474  12
   1   4  19 2168.57 173.255   5
  -1   4 -19 1720.48 217.850   1
  -1  -4 -19 2110.32 244.137   1
  -1  -4 -20 3302.90 312.539   1
   1   4  20 3418.52 222.814   5
  -1   4 -20 3068.57 278.974   1
   1  -4  20 3401.38 297.743   7
   1  -4  20 4037.86 331.187   2
   1  -4  20 2889.34 292.100  12
   1  -4  21 10544.6 545.907  12
   1   4  21 9805.10 401.881   5
  -1  -4 -21 10328.9 533.455   1
  -1   4 -21 9481.04 500.663   1
   1  -4  21 9187.21 487.954   7
   1  -4  21 11863.1 561.552   2
   1  -4  22 6200.22 418.415   2
  -1  -4 -22 5853.81 408.092   1
   1  -4  22 6178.13 430.181  12
   1  -4  22 4959.00 369.802   7
   1   4  22 5322.71 300.846   5
  -1   4 -22 5135.47 376.833   1
   1  -4  23 6603.68 446.586   2
   1  -4  23 6143.07 441.541  12
  -1   4 -23 6409.29 423.262   1
   1   4  23 6105.00 327.576   5
   1  -4  23 6820.04 430.518   7
  -1  -4 -23 5723.84 419.231   1
  -1   4 -24 845.893 218.439   1
   1  -4  24 699.624 210.016   7
  -1  -4 -24 147.327 181.772   1
   1  -4  24 609.137 218.964   2
   1   4  24 307.423 140.072   5
   1  -4  24 983.694 256.829  12
  -1  -4 -25 27170.0 994.470   1
   1   4  25 28106.4 823.905   5
  -1   4 -25 27503.2 970.917   1
   1  -4  25 27345.3 966.225   7
   1  -4  25 27837.1 1021.84  12
   1  -4  25 27818.2 993.425   2
   1   4  26 7632.66 399.436   5
   1  -4  26 7753.45 529.796  12
   1  -4  26 7828.03 505.556   7
  -1  -4 -26 7951.57 520.128   1
   1  -4  26 8036.37 516.890   2
  -1   4 -26 7965.93 507.829   1
   1  -4  27 4490.25 395.319   2
  -1   4 -27 3705.95 359.006   1
  -1  -4 -27 3804.91 386.743   1
   1  -4  27 4349.57 405.746  12
   1   4  27 3520.63 329.111   8
   1   4  27 4286.24 300.360   5
   1  -4  27 4384.58 391.840   7
   1   4  28 3744.03 287.957   5
   1   4  28 3293.60 332.578   8
   1  -4  28 3672.95 397.620  12
  -1  -4 -28 3612.91 378.658   1
   1  -4  28 3619.78 364.785   2
   1  -4  28 3454.86 361.612   7
  -1   4 -28 3633.39 363.479   1
  -1   4 -29 1012.32 234.007   1
   1  -4  29 1273.90 285.770  12
   1  -4  29 1538.44 278.175   7
   1  -4  29 958.903 233.861   2
   1   4  29 1127.41 179.522   5
   1   4  29 1110.20 223.626   8
  -1  -4 -29 1486.63 271.379   1
   1  -4  30 7542.24 532.708   2
  -1   4 -30 7525.48 529.990   1
   1  -4  30 8397.35 599.297  12
   1  -4  30 7843.88 541.724   7
   1   4  30 8145.37 510.215   8
  -1  -4 -30 7825.72 550.477   1
  -1  -4 -31 5184.08 466.947   1
   1  -4  31 5963.80 487.129   7
   1   4  31 5414.79 430.182   8
   1  -4  31 6365.71 536.175  12
   1  -4  31 5380.15 463.588   2
  -1   4 -31 5637.29 473.589   1
   1  -4  32 215.776 199.304   2
  -1   4 -32 323.708 180.118   1
   1   4  32 723.742 230.576   8
  -1  -4 -32-132.536 145.818   1
   1  -4  32 464.894 242.681  12
   1  -4  32 484.946 236.279   7
   1   4  33 2734.43 333.575   8
  -1   4 -33 3389.54 398.324   1
   1  -4  33 3648.53 413.177   7
   1  -4  33 3666.47 403.431   2
  -1  -4 -33 2793.33 368.302   1
   1  -4  33 2598.79 395.019  12
   1  -4  34 9528.75 641.158   7
  -1   4 -34 9890.87 650.940   1
   1   4  34 8766.33 578.283   8
   1  -4  34 9703.67 699.840  12
  -1  -4 -34 8911.11 638.246   1
   1  -4  34 10711.1 672.474   2
  -1   4 -35 6302.12 535.519   1
   1   4  35 6376.09 501.943   8
   1   4  35 6422.50 619.548  12
   1  -4  35 7028.46 614.981  12
   1  -4  35 7486.27 586.470   7
  -1  -4 -35 7021.59 577.837   1
   1  -4  35 7344.56 565.179   2
  -1   4 -36 4884.75 480.677   1
   1   4  36 5498.88 582.869  12
   1   4  36 5911.93 491.455   8
  -1  -4 -36 6342.85 554.645   1
   1  -4  36 5465.58 546.604  12
   1  -4  36 5748.10 534.725   7
  -1   4 -37 1394.64 290.676   1
  -1  -4 -37 1679.33 347.389   1
   1   4  37 1014.72 262.463   8
   1  -4  37 1242.16 297.544   7
   1   4  38 423.121 224.486   8
   1  -4  38-170.529 241.194   7
   1   5 -39 5576.68 494.937   1
   1   5 -38 153.870 176.322   1
   1  -5 -38 485.007 220.810   1
   1  -5 -37 967.208 257.530   1
   1   5 -37 1465.32 267.133   1
  -1  -5  37 1873.17 355.505   7
  -1  -5  37 1607.34 357.986  12
  -1   5  37 1331.71 327.401  12
  -1  -5  36 1202.45 281.867  12
  -1   5  36 1904.49 377.087  12
   1  -5 -36 1245.77 273.930   1
  -1  -5  36 1726.48 348.881   7
   1   5 -36 1522.66 275.328   1
  -1  -5  35 437.652 265.784  12
   1  -5 -35 31.1149 179.137   1
  -1   5  35 228.803 261.189  12
   1   5 -35 248.451 188.372   1
  -1   5  35 101.945 142.688   5
  -1  -5  35 305.816 231.308   7
   1  -5 -34 454.206 209.354   1
   1   5 -34 510.709 203.968   1
  -1   5  34 556.802 184.535   5
  -1  -5  34 762.831 287.447  12
  -1  -5  34 819.176 255.180   7
  -1   5  34 515.023 239.607  12
  -1  -5  33 8752.74 645.070  12
   1  -5 -33 9988.76 627.108   1
  -1   5  33 9495.82 560.476   5
  -1   5  33 9318.18 672.753  12
  -1  -5  33 9738.16 660.770   7
   1   5 -33 9057.69 572.526   1
   1   5 -32 2821.36 329.149   1
  -1  -5  32 3281.18 399.054   7
  -1   5  32 2714.14 372.998  12
  -1   5  32 2779.85 311.418   5
  -1  -5  32 3197.11 407.691  12
   1  -5 -32 3087.74 361.576   1
  -1   5  31 230.858 153.198   8
  -1  -5  31-42.0379 198.034   7
   1  -5 -31 442.565 196.228   1
  -1   5  31 410.816 174.233   5
   1   5 -31 341.376 175.232   1
  -1  -5  31 284.010 185.269  12
  -1   5  31 524.328 253.164  12
   1   5 -30 4794.16 387.083   1
  -1   5  30 4899.50 470.170  12
  -1  -5  30 4629.14 456.445  12
  -1   5  30 4709.28 343.882   8
  -1  -5  30 5140.37 467.352   7
  -1   5  30 4665.02 378.307   5
   1  -5 -30 4615.73 415.902   1
  -1   5  29 228.680 142.401   5
  -1   5  29 653.807 255.627  12
  -1   5  29 353.457 128.396   8
  -1  -5  29 777.042 249.639  12
  -1  -5  29 439.961 222.337   7
   1  -5 -29 535.146 179.041   1
   1   5 -29 693.928 183.335   1
  -1   5  28 2072.68 249.783   5
   1  -5 -28 2123.27 288.029   1
   1   5 -28 2432.46 283.352   1
  -1  -5  28 1843.83 289.896   7
  -1  -5  28 2296.24 315.457  12
  -1   5  28 2542.24 333.032  12
  -1   5  28 2331.47 237.069   8
  -1   5  27 3624.77 288.434   8
   1  -5 -27 3868.98 359.507   1
  -1  -5  27 3502.41 359.749  12
  -1   5  27 3807.02 398.840  12
  -1   5  27 3362.95 305.507   5
   1   5 -27 3636.75 323.012   1
  -1  -5  27 3737.33 371.990   7
  -1   5  26 3151.74 296.465   5
   1   5 -26 3217.28 302.948   1
   1  -5 -26 4025.23 365.778   1
  -1   5  26 2846.74 348.366  12
  -1  -5  26 3302.82 370.073   7
  -1  -5  26 3571.18 379.396  12
  -1   5  25 24295.9 958.438  12
  -1  -5  25 24559.5 930.077   7
  -1  -5  25 24254.4 935.989  12
   1   5 -25 23848.2 833.049   1
  -1   5  25 24388.3 824.471   5
   1  -5 -25 23623.6 892.543   1
   1   5 -24 6103.15 389.656   1
  -1  -5  24 6214.01 451.243   7
  -1   5  24 6841.52 313.962   2
  -1   5  24 6142.41 390.967   5
   1  -5 -24 6683.90 448.310   1
  -1  -5  24 6734.18 473.131  12
  -1  -5  23 338.425 196.999  12
   1  -5 -23 80.7442 152.627   1
  -1  -5  23 95.4818 175.283   7
  -1   5  23 15.4048 120.722   5
   1   5 -23 210.988 131.108   1
  -1   5  23 81.7439 75.8558   2
   1  -5 -22 9696.28 514.351   1
  -1  -5  22 10140.9 542.492   7
  -1   5  22 9549.29 463.445   5
  -1   5  22 11306.9 391.132   2
   1   5 -22 9415.65 464.827   1
  -1  -5  22 10220.7 548.027  12
   1  -5 -21 340.701 138.268   1
  -1  -5  21 325.130 171.150   7
  -1  -5  21 675.127 198.480  12
  -1   5  21 210.814 118.164   5
   1   5 -21 451.704 141.483   1
   1   5 -20 3990.83 281.526   1
  -1  -5  20 3975.84 327.874  12
  -1   5  20 3615.35 272.303   5
  -1  -5  20 3905.63 334.023   7
   1  -5 -20 3768.95 305.875   1
   1  -5 -19 5310.70 351.553   1
   1   5 -19 4681.40 302.712   1
  -1   5  19 4822.20 307.230   5
  -1  -5  19 5387.51 379.910   7
  -1  -5  19 5659.31 377.721  12
  -1  -5  18 36910.4 1010.22  12
  -1  -5  18 35961.4 1000.75   7
  -1   5  18 35693.0 906.783   5
   1   5 -18 35252.8 892.847   1
  -1   5  18 34139.0 809.750   8
   1   5 -17 43702.5 1048.99   1
  -1  -5  17 40811.1 1120.58  12
   1   5 -17 46132.5 1159.40  10
  -1   5  17 39782.5 768.566   9
  -1   5  17 45590.5 972.243   8
  -1   5  17 44204.5 1064.33   5
  -1  -5  17 46415.2 1169.90   7
  -1  -5  16 31161.6 878.866   7
   1   5 -16 30225.1 779.539   1
  -1   5  16 30787.7 710.616   8
  -1  -5  16 34378.7 905.354  12
   1  -5 -16 28758.7 532.672   3
  -1   5  16 29724.4 793.998   5
   1   5 -16 29778.8 860.549  10
  -1  -5  15 344.468 148.489  12
  -1   5  15 497.586 122.329   5
  -1   5  15 214.391 68.9466   8
  -1  -5  15 337.859 143.635   7
   1  -5 -15 295.821 38.1944   3
   1   5 -15 212.788 87.7275   1
   1   5 -15 25.5091 124.170  10
   1   5 -14 24223.9 744.911  10
  -1   5  14 24674.3 596.596   8
   1   5 -14 23380.6 653.270   1
  -1  -5  14 24132.5 731.975  12
  -1  -5  14 24500.5 747.642   7
  -1   5  14 24339.3 680.155   5
  -1  -5  13 864.657 147.473  12
   1   5 -13 668.098 107.552   1
  -1  -5  13 640.335 144.770   7
  -1   5  13 655.835 104.160   5
   1   5 -13 625.519 129.817  10
  -1   5  13 647.339 83.0590   8
   1   5 -12 30639.4 736.203   1
  -1  -5  12 31575.3 821.143  12
  -1   5  12 30250.6 761.379   5
   1   5 -12 30034.0 816.085  10
  -1  -5  12 30500.3 824.004   7
  -1   5  12 29940.3 666.916   8
   1   5 -11 36619.5 834.222   1
   1   5 -11 36230.2 909.578  10
  -1  -5  11 37578.9 928.806   7
  -1   5  11 36881.2 868.242   5
  -1   5  11 37522.0 765.196   8
  -1   5  10 420.211 57.9425   8
  -1   5  10 503.894 98.9972   5
   1   5 -10 478.901 108.333  10
  -1  -5  10 547.048 116.508   7
  -1   5   9 85523.7 1522.94   8
  -1  -5   9 86217.0 1700.37   7
   1   5  -9 83056.9 1685.46  10
  -1   5   9 85861.4 1650.97   5
  -1  -5   8 8400.80 280.801   1
   1   5  -8 8575.31 332.203  10
  -1   5   8 8529.90 310.501   5
  -1  -5   8 8543.30 332.543   7
  -1   5   8 8749.44 234.936   8
   1   5  -7 6686.82 285.002   8
  -1   5   7 6415.13 263.616   5
  -1  -5   7 6570.20 275.958   7
  -1  -5   7 6337.22 228.382   1
   1   5  -7 6644.44 275.826  10
   1  -5  -7 6753.83 190.120   8
  -1   5   7 6319.42 187.462   8
  -1  -5   6 8701.75 268.562   1
  -1   5   6 9233.52 283.699   4
  -1   5   6 8346.92 298.735   5
   1   5  -6 9355.35 333.518   8
  -1  -5   6 8811.25 314.669   7
   1  -5  -6 8349.50 220.539   8
  -1   5   6 8791.92 223.978   8
   1   5  -6 8086.46 302.327  10
   1  -5  -6 8349.31 309.669   6
   1  -5  -5 3020.18 172.964   6
   1   5  -5 3126.61 184.538   8
   1  -5  -5 2855.87 149.871   4
  -1   5   5 2886.99 110.330   8
   1   5  -5 2823.66 166.333  10
  -1  -5   5 2701.46 165.348   7
  -1   5   5 2975.27 145.808   4
   1  -5  -5 2877.82 108.228   8
   1   5  -4 209.985 83.3234   8
  -1  -5   4 25.4480 45.2289  10
  -1   5   4 89.5760 42.6885   2
   1  -5  -4 118.612 52.2362   4
   1  -5  -4 71.8926 27.9952   8
  -1   5   4 98.5493 49.4634   4
  -1  -5   4 137.767 67.8824   7
   1  -5  -4 238.207 69.5538   6
  -1   5   4 113.972 36.8227   8
   1   5  -4 29.5880 61.4524  10
   1  -5  -3 43448.7 862.203   4
   1   5  -3 43942.1 891.656  10
  -1  -5   3 46403.6 893.889  10
  -1   5   3 42064.8 850.894  11
  -1   5   3 43316.7 863.904   4
   1  -5  -3 41233.6 892.644   6
  -1   5   3 42705.2 853.345   2
  -1   5   3 42326.3 887.283  10
   1  -5  -3 42974.0 803.008   8
   1   5  -3 46018.5 930.851   8
  -1  -5   3 42411.1 881.890   7
  -1   5   3 42719.1 811.704   8
   1  -5  -2 4345.90 153.216   8
  -1   5   2 4536.07 185.816   2
   1   5  -2 4434.54 207.260   8
  -1   5   2 4496.70 195.971   6
  -1  -5   2 4502.35 201.534   6
  -1  -5   2 4873.59 193.365  10
   1  -5  -2 4663.16 181.691   4
   1  -5  -2 4554.85 198.782   6
   1   5  -2 5216.66 202.032  10
  -1  -5   2 4294.32 186.296   7
  -1   5   2 4411.22 192.646  10
  -1   5   2 4411.02 159.774   8
  -1   5   2 4526.04 174.105  11
   1   5  -1 100563. 1800.46   6
  -1   5   1 95988.0 1747.16  11
  -1   5   1 98612.8 1788.04   2
  -1  -5   1 90690.1 1788.31   8
  -1  -5   1 97047.8 1773.02  10
   1  -5  -1 97680.5 1788.93   6
  -1   5   1 99288.4 1784.46  10
   1  -5  -1 101299. 1752.39  11
   1  -5  -1 98639.1 1726.68   8
   1   5  -1 91186.9 1791.48   8
   1  -5  -1 99635.9 1785.85  10
  -1   5   1 98576.4 1790.82   6
  -1  -5   1 98567.5 1797.66   6
   1  -5  -1 98667.6 1767.40   4
  -1   5   1 98052.1 1737.14   8
   1   5  -1 100574. 1780.21  10
  -1  -5   0 65855.6 1242.09   6
   1   5   0 61356.9 1231.39   6
  -1   5   0 64041.7 1228.52  10
  -1   5   0 65052.9 1255.02   2
   1   5   0 64974.9 1222.53  10
   1  -5   0 68688.9 1208.30  11
  -1   5   0 63419.1 1201.71  11
  -1  -5   0 65621.6 1224.11  10
   1  -5   0 64393.6 1231.50  10
   1  -5   0 63496.6 1193.37   8
   1  -5   0 61983.2 1225.89   6
   1   5   0 64321.8 1247.24   8
  -1   5   0 65524.7 1233.77   6
   1  -5   0 65006.9 1243.47   2
  -1  -5   0 60968.7 1238.45   8
  -1   5  -1 107603. 1977.56  10
  -1  -5  -1 109185. 1983.90   6
   1   5   1 116883. 1978.31  10
   1  -5   1 110958. 1952.46  11
   1  -5   1 104802. 2002.22   2
   1  -5   1 106950. 1969.28   6
   1  -5   1 107821. 1958.44   8
  -1   5  -1 108328. 1953.34  11
   1   5   1 111649. 1988.59   6
   1   5   1 108031. 1988.56   8
   1  -5   1 110480. 1977.46  10
  -1   5  -1 109237. 2023.93   2
  -1  -5  -1 114278. 1996.86   8
  -1  -5  -1 112028. 1970.82  10
  -1   5  -1 108383. 1971.42   6
   1  -5   2 593.754 75.4141   6
  -1   5  -2 376.611 58.4768   6
   1  -5   2 510.954 68.7771  11
   1  -5   2 435.810 68.2652  10
  -1  -5  -2 581.631 75.6348   8
  -1   5  -2 513.028 84.2117   2
   1   5   2 534.186 82.9509   8
   1  -5   2 394.391 63.4132   8
   1   5   2 512.229 72.1227   6
   1   5   2 488.689 76.8702  10
  -1   5  -2 398.484 73.4909  10
  -1  -5  -2 448.998 73.6061   6
   1  -5   2 665.395 100.426   2
   1  -5   3 1804.39 144.502   2
   1  -5   3 1876.42 121.872   6
   1   5   3 1825.79 123.380   6
  -1   5  -3 1890.54 130.135  10
  -1  -5  -3 2024.63 125.082   9
  -1   5  -3 1945.20 121.407   6
   1  -5   3 2056.04 121.504  11
   1   5   3 1970.97 130.761   8
   1  -5   3 1883.86 87.7893  12
  -1  -5  -3 1939.03 129.360   6
   1  -5   4 1343.24 86.1956  12
  -1   5  -4 1496.07 106.539   6
   1  -5   4 1596.40 113.113   6
  -1  -5  -4 1650.58 121.082   6
   1   5   4 1561.35 120.125   8
  -1   5  -4 1632.99 126.470  10
   1   5   4 1642.21 118.147   6
   1  -5   4 1642.43 147.433   2
  -1  -5  -4 1294.66 104.070   9
   1  -5   4 1433.13 120.488   7
  -1   5  -5 4666.68 219.229  10
  -1  -5  -5 4583.41 202.384   6
   1  -5   5 5054.64 253.858   2
  -1  -5  -5 4617.09 159.088   5
   1   5   5 4567.60 206.765   8
  -1   5  -5 4639.03 195.326   6
   1  -5   5 4621.88 215.285   7
   1  -5   5 4840.76 181.413  12
  -1  -5  -5 4905.96 196.165   9
   1   5   6 4908.56 219.005   8
  -1   5  -6 4972.81 228.613  10
   1  -5   6 5131.29 266.430   2
  -1  -5  -6 4997.03 203.059   9
  -1   5  -6 4906.88 205.938   6
  -1  -5  -6 5089.00 169.068   5
   1  -5   6 4944.08 201.006  12
   1  -5   6 4766.85 223.839   7
  -1  -5  -6 5005.81 216.791   6
   1   5   7 189.884 50.7975   9
   1  -5   7 207.885 67.1470  12
   1   5   7 88.4368 65.2727   8
  -1   5  -7 171.243 49.9007   6
   1  -5   7 287.533 81.1019   7
  -1  -5  -7 236.519 41.4919   5
  -1   5  -7 260.075 91.4456  10
   1  -5   7 214.115 112.653   2
  -1  -5  -7 184.330 56.5484   9
  -1  -5  -7 234.224 68.2375   6
  -1  -5  -8 17664.8 483.116   6
  -1  -5  -8 15777.0 434.992   9
   1   5   8 17722.2 449.255   9
  -1   5  -8 17399.8 510.151  10
   1   5   8 16926.8 485.934   8
   1  -5   8 17284.7 500.164   7
  -1  -5  -8 18168.5 406.412   5
   1  -5   8 18003.2 568.068   2
   1  -5   8 17991.7 492.341  12
   1   5   9 324.494 55.6581   5
   1   5   9 266.075 81.9900   8
   1   5   9 369.645 63.7554   9
   1  -5   9 300.060 79.3644  12
  -1   5  -9 280.309 84.6089   1
  -1  -5  -9 215.928 67.4773   6
   1  -5   9 460.593 96.2288   7
  -1   5  -9 408.536 98.1631  10
   1  -5   9 496.604 144.903   2
  -1  -5 -10 29229.2 728.331   6
  -1   5 -10 29960.0 774.424   1
   1   5  10 29649.6 739.691   8
   1   5  10 31592.5 688.954   9
   1   5  10 29662.9 642.313   5
   1  -5  10 30557.7 766.850   7
   1  -5  10 29422.0 754.773  12
  -1   5 -10 31650.3 788.224  10
   1  -5  10 31866.6 853.105   2
  -1   5 -11 43390.2 1019.07   1
   1  -5  11 43427.1 1015.04  12
   1   5  11 41670.6 867.214   5
  -1  -5 -11 43692.5 838.154   3
   1  -5  11 43808.8 1012.51   7
  -1  -5 -11 43737.3 973.457   6
  -1   5 -11 42035.0 1017.14  10
   1   5  11 43381.3 982.002   8
   1  -5  11 41915.2 1078.53   2
   1  -5  12 7185.30 336.514   7
   1   5  12 7762.57 258.678   5
   1   5  12 6826.39 310.202   8
  -1  -5 -12 7094.41 213.034   3
  -1   5 -12 7336.37 350.264  10
   1  -5  12 6702.73 333.287  12
  -1  -5 -12 7295.60 316.411   6
   1  -5  12 7368.16 387.124   2
  -1   5 -12 7501.31 342.473   1
   1   5  13 2460.87 188.156   8
   1  -5  13 2590.16 243.714   2
  -1   5 -13 2446.41 210.117   1
  -1   5 -13 2411.95 210.604  10
   1   5  13 2285.17 141.835   5
  -1  -5 -13 2339.43 105.157   3
   1  -5  13 2407.87 211.543  12
  -1  -5 -13 2406.73 182.286   6
   1  -5  13 2221.72 198.964   7
  -1   5 -14 22296.9 673.040   1
   1   5  14 21506.8 538.691   5
  -1   5 -14 20787.1 679.008  10
  -1  -5 -14 19873.1 426.560   3
  -1  -5 -14 21896.5 702.358   1
   1   5  14 19998.3 616.636   8
   1  -5  14 20640.8 703.156   2
   1  -5  14 22059.3 685.238  12
   1  -5  14 22432.1 669.019   7
   1  -5  15 7700.48 378.979   7
  -1   5 -15 7693.62 389.701   1
   1   5  15 7846.11 361.505   8
   1  -5  15 7466.61 388.940  12
   1  -5  15 8236.21 439.301   2
  -1   5 -15 8221.33 406.595  10
  -1  -5 -15 7713.30 405.198   1
   1   5  15 7816.90 295.370   5
   1  -5  16 8303.49 412.344   7
   1   5  16 8707.56 322.132   5
  -1   5 -16 8102.08 425.256  10
   1   5  16 8313.62 386.000   8
   1  -5  16 8595.26 452.740   2
   1  -5  16 8679.50 434.599  12
  -1  -5 -16 8478.00 438.879   1
  -1   5 -16 8529.91 415.142   1
   1  -5  17 1758.53 212.469  12
   1  -5  17 1438.96 205.210   2
   1   5  17 1978.37 201.446   8
  -1   5 -17 1495.61 205.938  10
  -1   5 -17 1629.26 211.759   1
   1  -5  17 1663.36 203.596   7
  -1  -5 -17 1696.49 229.697   1
   1   5  17 1764.86 146.506   5
   1  -5  18 3320.98 289.930  12
  -1   5 -18 3346.63 273.764   1
   1  -5  18 3035.96 285.215   2
   1   5  18 3729.66 214.703   5
   1   5  18 3482.24 258.419   8
  -1  -5 -18 3341.08 289.921   1
   1  -5  18 3293.59 281.926   7
   1  -5  19 4852.51 352.332  12
  -1  -5 -19 4240.24 342.477   1
   1  -5  19 5132.22 377.179   2
  -1   5 -19 4287.64 320.818   1
   1   5  19 3865.30 284.333   8
   1  -5  19 4338.58 328.555   7
   1   5  19 4082.03 237.247   5
   1   5  20 9931.90 464.375   8
  -1   5 -20 9735.26 497.546   1
   1   5  20 9372.89 379.932   5
   1  -5  20 10378.0 534.382  12
  -1  -5 -20 10009.0 528.833   1
   1  -5  20 10075.3 528.055   2
   1  -5  20 9785.23 500.180   7
   1  -5  21 10367.8 550.270  12
  -1   5 -21 10885.8 530.723   1
  -1  -5 -21 10183.5 553.513   1
   1  -5  21 10978.9 539.844   7
   1   5  21 11308.2 430.699   5
   1  -5  21 12921.5 599.525   2
   1   5  21 11351.0 507.018   8
   1  -5  22 208.542 167.517   2
  -1   5 -22 37.1524 124.942   1
   1   5  22 349.137 155.261   8
  -1  -5 -22 234.689 176.411   1
   1   5  22 27.1546 82.2584   5
   1  -5  22 193.858 154.261  12
   1  -5  22-102.850 149.257   7
   1  -5  23 1680.78 255.357  12
   1  -5  23 1652.25 252.081   7
  -1  -5 -23 1365.60 226.017   1
  -1   5 -23 1492.92 238.349   1
   1   5  23 1702.94 224.326   8
   1  -5  23 1483.37 251.782   2
   1   5  23 1598.39 170.342   5
   1  -5  24 5948.31 447.057  12
   1   5  24 6183.59 334.936   5
   1  -5  24 6119.36 432.865   7
   1  -5  24 5823.28 430.210   2
  -1  -5 -24 6154.58 452.672   1
  -1   5 -24 6048.81 418.153   1
   1   5  24 5687.16 381.670   8
   1  -5  25 6305.40 464.942   2
  -1  -5 -25 5750.64 456.196   1
   1   5  25 5986.09 339.971   5
   1  -5  25 6183.14 465.228  12
   1   5  25 5807.28 396.574   8
   1  -5  25 5730.71 435.598   7
  -1   5 -25 6132.21 430.615   1
   1  -5  26 6201.76 463.543   2
   1  -5  26 6048.13 471.087  12
  -1   5 -26 6165.31 452.893   1
  -1  -5 -26 6201.42 465.012   1
   1  -5  26 5692.81 438.522   7
   1   5  26 6195.10 413.616   8
   1   5  26 6016.18 347.938   5
  -1  -5 -27 5921.96 460.891   1
   1   5  27 5431.65 396.314   8
  -1   5 -27 5762.62 437.570   1
   1  -5  27 6443.84 485.878  12
   1   5  27 5685.27 344.053   5
   1  -5  27 6081.90 456.692   7
   1  -5  27 5744.48 453.767   2
   1  -5  28 1046.05 268.482  12
   1   5  28 589.183 159.118   5
   1  -5  28 1202.87 261.278   7
  -1  -5 -28 715.336 255.890   1
   1   5  28 722.085 209.266   8
  -1   5 -28 875.916 229.230   1
   1  -5  28 641.165 228.469   2
  -1   5 -29 10009.0 587.733   1
   1  -5  29 9949.48 600.776   7
   1  -5  29 10190.3 619.766   2
   1   5  29 10076.4 559.458   8
   1  -5  29 10334.5 650.466  12
  -1  -5 -29 9831.87 616.577   1
  -1  -5 -30 4794.59 447.897   1
  -1   5 -30 5287.50 453.170   1
   1  -5  30 4752.65 463.068  12
   1   5  30 5615.79 433.959   8
   1  -5  30 5513.35 472.207   7
   1  -5  30 5233.34 462.243   2
  -1  -5 -31 13003.6 734.434   1
   1  -5  31 11694.1 684.666   2
   1  -5  31 12244.2 734.268  12
   1  -5  31 11895.3 694.895   7
   1   5  31 11483.6 623.614   8
  -1   5 -31 12523.4 698.635   1
  -1  -5 -32 2478.01 353.149   1
   1  -5  32 2506.97 376.789  12
   1  -5  32 2576.67 351.192   2
  -1   5 -32 2417.50 336.002   1
   1   5  32 2494.41 324.816   8
   1  -5  32 2131.12 340.947   7
   1  -5  33 9302.50 630.336   7
   1  -5  33 10627.0 661.273   2
   1   5  33 9635.82 591.633   8
   1  -5  33 9139.06 663.272  12
  -1   5 -33 9477.64 634.952   1
  -1  -5 -33 10126.2 665.781   1
  -1  -5 -34 2015.51 329.875   1
   1  -5  34 2785.51 380.631   2
   1  -5  34 2430.74 385.668  12
   1   5  34 2199.63 307.442   8
   1  -5  34 2027.28 344.553   7
  -1   5 -34 2575.98 347.682   1
  -1   5 -35 2274.35 346.448   1
   1  -5  35 2811.64 370.257   2
   1  -5  35 2217.75 354.253   7
  -1  -5 -35 2461.65 364.131   1
   1  -5  35 3242.31 448.190  12
   1   5  35 2571.30 330.987   8
  -1  -5 -36 645.470 273.168   1
   1   5  36-59.8132 244.187  12
   1   5  36 526.448 204.779   8
  -1   5 -36 737.364 255.302   1
   1  -5  36 293.736 217.268   7
   1  -5  36 209.436 246.559  12
   1  -5  37 9086.04 670.130   7
  -1   5 -37 10397.8 689.797   1
   1   5  37 8355.57 588.892   8
   1   6 -39 884.958 254.635   1
   1   6 -38 3026.82 371.799   1
  -1  -6  37 1491.76 344.999   7
   1  -6 -37 1661.12 306.066   1
  -1   6  37 2075.92 401.093  12
   1   6 -37 1717.38 286.992   1
  -1  -6  36 592.210 262.759  12
  -1   6  36 649.150 289.967  12
   1  -6 -36 75.5034 167.773   1
   1   6 -36 518.307 221.595   1
  -1  -6  36-0.84398 221.604   7
   1  -6 -35 450.706 221.546   1
   1   6 -35 524.553 204.266   1
  -1   6  35 143.658 210.111  12
  -1  -6  35 87.6844 214.501  12
  -1  -6  35 213.736 233.088   7
   1  -6 -34 7836.83 571.523   1
  -1   6  34 7398.80 618.034  12
  -1   6  34 6697.83 475.853   5
  -1  -6  34 7853.18 619.582   7
   1   6 -34 7067.27 516.379   1
  -1  -6  34 7063.48 580.308  12
  -1   6  33 641.782 265.188  12
   1   6 -33 650.267 206.492   1
  -1  -6  33 218.387 208.775  12
  -1   6  33 434.811 176.392   5
  -1  -6  33 281.395 251.024   7
   1  -6 -33 199.841 180.252   1
  -1   6  32 4236.05 373.116   5
  -1  -6  32 5047.61 499.617   7
   1   6 -32 4253.75 396.232   1
  -1  -6  32 4479.11 461.643  12
  -1   6  32 4482.38 482.624  12
   1  -6 -32 4851.31 445.686   1
  -1  -6  31 319.005 209.901  12
   1   6 -31 289.765 173.827   1
  -1  -6  31 111.217 238.370   7
  -1   6  31 232.469 234.642  12
  -1   6  31-251.687 158.163   5
   1  -6 -31 158.048 164.523   1
   1  -6 -30 389.781 170.148   1
  -1  -6  30 692.485 251.324  12
  -1  -6  30 328.506 203.556   7
  -1   6  30 230.381 138.371   5
  -1   6  30 435.698 251.970  12
  -1   6  30 168.611 128.673   8
   1   6 -30 634.809 208.449   1
   1  -6 -29 8130.39 543.612   1
   1   6 -29 9344.93 539.914   1
  -1   6  29 9339.52 473.771   8
  -1  -6  29 9464.64 605.496   7
  -1   6  29 9579.98 634.321  12
  -1   6  29 9352.69 520.790   5
  -1  -6  29 8957.33 595.030  12
   1   6 -28 383.688 160.059   1
  -1  -6  28 734.191 230.692   7
  -1   6  28 212.028 150.577   5
  -1  -6  28 1103.96 248.189  12
  -1   6  28 677.330 237.197  12
  -1   6  28 504.167 150.371   8
   1  -6 -28 459.248 192.198   1
   1   6 -27 728.574 178.197   1
  -1   6  27 968.782 171.995   8
  -1  -6  27 494.352 193.254  12
   1  -6 -27 822.767 215.271   1
  -1   6  27 750.223 167.543   5
  -1   6  27 542.872 205.445  12
  -1  -6  27 497.048 209.865   7
   1   6 -26 868.444 177.784   1
  -1   6  26 1263.43 183.770   8
  -1   6  26 1091.91 232.432  12
  -1   6  26 874.759 176.462   5
  -1  -6  26 1320.56 245.353  12
   1  -6 -26 910.920 207.767   1
  -1  -6  26 1144.57 260.814   7
  -1  -6  25 682.549 224.264   7
  -1   6  25 434.573 143.800   5
   1   6 -25 472.454 141.008   1
  -1   6  25 595.683 138.393   8
   1  -6 -25 771.495 198.778   1
  -1  -6  25 341.260 180.668  12
   1  -6 -24 5612.33 412.677   1
  -1   6  24 5414.02 360.200   5
  -1  -6  24 6086.34 437.797  12
   1   6 -24 6053.15 379.436   1
  -1  -6  24 5606.63 426.472   7
  -1   6  24 5684.95 330.374   8
   1   6 -23 1010.37 188.658   1
   1  -6 -23 1063.84 214.476   1
  -1   6  23 1254.00 133.941   2
  -1   6  23 1271.00 164.385   8
  -1  -6  23 1227.05 236.851   7
  -1   6  23 1490.79 205.720   5
  -1  -6  23 1378.64 236.194  12
  -1  -6  22 6570.58 440.454   7
  -1   6  22 5909.21 364.232   5
   1   6 -22 6069.63 378.923   1
  -1   6  22 5736.81 314.286   8
  -1  -6  22 6225.90 425.089  12
   1  -6 -22 6068.62 405.469   1
  -1   6  21 33413.9 872.124   8
  -1   6  21 33950.4 964.096   5
   1  -6 -21 34279.8 1039.24   1
  -1  -6  21 30823.8 1033.74  12
   1   6 -21 34580.7 966.356   1
  -1  -6  21 35012.2 1076.19   7
   1  -6 -20 53586.7 1365.94   1
  -1   6  20 51277.7 1268.69   5
  -1  -6  20 54355.9 1389.24  12
  -1   6  20 51230.7 1168.89   8
   1   6 -20 50658.3 1260.75   1
  -1  -6  20 50187.2 1373.24   7
  -1  -6  19 286.783 178.478   7
  -1  -6  19 293.126 219.460  12
   1   6 -19 292.158 132.942   1
  -1   6  19 173.294 145.133   5
  -1   6  19 80.8363 95.8415   8
   1   6 -18 440.596 143.362  10
  -1  -6  18 322.572 155.720   7
  -1   6  18 351.109 91.2754   8
  -1  -6  18 256.839 133.479  12
  -1   6  18 334.119 113.453   5
   1   6 -18 554.860 131.514   1
   1  -6 -17 913.048 59.3350   3
   1   6 -17 843.811 187.100  10
  -1  -6  17 720.886 175.423   7
  -1   6  17 1053.12 156.611   5
   1   6 -17 955.982 157.204   1
  -1  -6  17 1175.90 191.581  12
  -1   6  17 794.451 114.900   8
  -1   6  16 51100.0 1200.81   5
   1   6 -16 51414.4 1295.72  10
   1  -6 -16 52780.4 958.440   3
  -1   6  16 51521.3 1098.30   8
  -1  -6  16 52115.6 1299.20   7
   1   6 -16 51373.3 1183.23   1
  -1  -6  16 47906.9 1251.33  12
   1   6 -15 1094.35 142.827   1
  -1  -6  15 1647.86 215.741  12
  -1  -6  15 827.557 178.786   7
  -1   6  15 902.057 103.091   8
   1   6 -15 784.100 155.257  10
  -1   6  15 787.661 135.313   5
   1   6 -14 52820.6 1171.20   1
  -1   6  14 52672.9 1083.18   8
   1   6 -14 52280.9 1275.12  10
  -1   6  14 53205.1 1197.78   5
  -1  -6  14 54075.5 1287.49   7
  -1   6  13 17964.4 559.697   5
   1   6 -13 17709.3 611.809  10
  -1   6  13 18686.4 477.781   8
  -1  -6  13 18944.2 625.431   7
  -1  -6  12 1706.01 179.513   7
  -1   6  12 1950.79 171.105   5
  -1   6  12 1791.31 124.757   8
   1   6 -12 2066.62 191.606  10
  -1  -6  11 23055.0 682.483   7
  -1   6  11 23211.5 535.839   8
  -1   6  11 23335.0 633.875   5
   1   6 -11 23712.8 682.311  10
  -1  -6  10 48125.2 1106.13   7
  -1   6  10 47983.7 931.481   8
  -1   6  10 46969.5 1047.64   5
   1   6 -10 47029.1 1091.00  10
  -1  -6   9 1307.49 145.509   7
   1   6  -9 919.451 144.103  10
  -1   6   9 1554.33 96.6254   8
   1  -6  -9 1466.69 153.640   6
  -1   6   9 1552.42 149.293   5
  -1   6   8 19787.4 440.287   8
  -1   6   8 19520.3 538.684   5
   1  -6  -8 19712.7 566.631   6
   1  -6  -8 20313.0 441.960   8
   1  -6  -8 18421.9 370.306   9
   1   6  -8 20227.6 563.804  10
  -1  -6   8 20924.8 575.467   7
   1   6  -7 9258.90 361.939   8
  -1  -6   7 9711.58 353.937   7
   1  -6  -7 8616.06 337.429   6
  -1   6   7 8707.05 247.559   8
   1  -6  -7 9184.69 250.623   8
   1   6  -7 8268.77 333.882  10
  -1  -6   6 1679.84 142.826   7
  -1   6   6 1792.02 97.7107   8
   1  -6  -6 1838.05 96.6514   8
   1  -6  -6 2117.14 158.697   6
   1   6  -6 1877.62 149.279  10
   1  -6  -6 1737.96 123.834   4
   1   6  -6 1682.22 160.123   8
   1  -6  -5 24354.8 644.144   6
  -1   6   5 26781.8 546.501   8
   1   6  -5 27064.0 678.050   8
  -1  -6   5 25979.7 645.151   7
   1   6  -5 26007.7 643.477  10
   1  -6  -5 26401.3 602.121   4
  -1   6   5 26156.6 596.074   4
   1  -6  -5 26082.6 539.206   8
   1  -6  -4 4087.27 178.680   4
   1   6  -4 4104.75 218.272   8
   1  -6  -4 3687.62 146.402   8
  -1   6   4 4141.32 179.657   4
  -1   6   4 4307.52 207.693  10
   1  -6  -4 3878.44 204.982   6
  -1   6   4 4024.76 155.183   8
  -1  -6   4 3918.11 200.449   7
   1   6  -4 4331.95 209.012  10
  -1   6   3 3279.22 181.346  10
   1  -6  -3 3100.09 157.924   4
   1   6  -3 3177.38 182.196  10
   1  -6  -3 3245.22 182.832   6
  -1   6   3 3360.21 164.644   2
  -1   6   3 3392.30 145.605   8
  -1   6   3 3510.51 160.510  11
   1  -6  -3 3434.56 140.296   8
  -1  -6   3 3343.24 180.942   7
   1   6  -3 3380.98 193.932   8
  -1   6   2 2609.92 149.174   2
  -1   6   2 2289.47 123.382   8
   1  -6  -2 2415.55 155.583   6
   1   6  -2 2082.33 144.460  10
   1  -6  -2 2277.83 133.495   4
  -1   6   2 2361.32 130.317  11
   1  -6  -2 2214.23 115.075   8
  -1  -6   2 2323.63 146.486   7
  -1   6   2 1948.79 148.803  10
   1   6  -2 2209.57 155.348   8
  -1  -6   2 2130.93 149.595   6
  -1   6   1 3162.46 172.348  10
  -1   6   1 3505.08 180.047   2
  -1   6   1 3026.80 152.684   8
   1   6  -1 3569.67 177.856  10
   1   6  -1 2915.86 176.463   8
   1  -6  -1 3205.84 148.608   8
   1  -6  -1 3370.01 178.809   6
   1  -6  -1 3685.88 156.387  11
  -1   6   1 3325.31 154.452  11
  -1  -6   1 3195.60 180.739   6
   1   6   0 27764.9 616.835  10
   1  -6   0 25369.4 568.166  11
  -1   6   0 24742.2 609.332  10
   1  -6   0 24655.8 571.514   8
  -1   6   0 25816.3 634.791   2
  -1   6   0 26778.4 578.187  11
   1  -6   0 25909.1 611.496   6
  -1  -6   0 24803.2 615.547   6
   1   6   0 25278.7 624.679   8
  -1   6  -1 116906. 2152.89  10
   1  -6   1 118919. 2145.61   6
  -1   6  -1 117943. 1993.05  12
   1   6   1 115392. 2137.42  10
  -1  -6  -1 113627. 2147.74   6
   1   6   1 121315. 2163.59   8
   1  -6   1 123149. 2109.43  11
   1  -6   1 117007. 2119.69   8
   1   6   2 9421.41 303.364  10
  -1  -6  -2 8533.09 305.312   6
  -1   6  -2 9555.18 315.262  10
   1  -6   2 8198.83 289.004   8
  -1   6  -2 8416.95 216.447  12
   1   6   2 8484.56 302.155   8
   1  -6   2 8472.67 292.348   6
   1  -6   2 9679.65 337.323   2
   1  -6   2 9002.70 279.172  11
  -1   6  -3 2491.51 157.801  10
  -1  -6  -3 2426.34 157.048   6
   1  -6   3 2646.48 157.705   6
   1   6   3 2378.19 149.652  10
   1   6   3 2313.29 153.620   8
   1  -6   3 2635.63 184.138   2
  -1  -6  -4 4758.84 217.169   6
   1  -6   4 4806.64 253.557   2
   1  -6   4 4642.07 225.042   7
  -1  -6  -4 5133.02 211.327   9
  -1   6  -4 4455.97 221.933  10
   1  -6   4 4425.06 204.526   6
   1   6   4 4188.86 209.673   8
   1  -6   5 21006.6 547.177   6
  -1  -6  -5 24474.5 551.101   9
  -1  -6  -5 22321.1 566.779   6
  -1   6  -5 21943.3 579.321  10
   1  -6   5 21418.7 618.249   2
   1   6   5 21936.6 563.428   8
   1  -6   5 21759.7 492.969  12
   1  -6   5 21124.1 567.474   7
   1  -6   6 11864.0 339.800  12
   1   6   6 12095.0 256.406   4
  -1  -6  -6 12613.8 389.920   6
  -1   6  -6 12761.5 405.579  10
  -1  -6  -6 12038.1 316.637   5
   1   6   6 11170.1 373.905   8
  -1  -6  -6 11535.2 348.240   9
   1  -6   6 12257.6 440.274   2
   1  -6   6 11594.4 389.783   7
  -1  -6  -7 7339.72 230.243   5
   1  -6   7 7124.96 300.483   7
  -1  -6  -7 8043.71 269.362   9
  -1  -6  -7 6915.94 287.746   6
  -1   6  -7 6963.70 304.528  10
   1   6   7 7843.95 295.026   8
   1  -6   7 7071.67 339.569   2
   1  -6   7 7296.56 267.734  12
  -1  -6  -8 8893.28 330.526   6
   1  -6   8 8805.19 313.123  12
   1   6   8 8443.41 321.807   8
   1  -6   8 8172.11 382.159   2
  -1   6  -8 8534.64 348.262  10
  -1  -6  -8 8551.83 288.914   9
  -1  -6  -8 8599.40 258.145   5
   1  -6   8 8455.43 338.151   7
   1  -6   9 921.882 148.027   2
   1   6   9 845.243 108.451   8
  -1  -6  -9 974.040 118.347   6
  -1   6  -9 859.030 124.709  10
  -1  -6  -9 1074.03 102.926   9
   1  -6   9 961.556 111.294  12
  -1  -6  -9 893.993 78.3100   5
   1  -6   9 849.707 125.561   7
  -1   6 -10 1698.49 173.838  10
   1  -6  10 1568.57 143.463  12
   1  -6  10 1436.53 182.467   2
   1   6  10 1555.00 148.079   8
   1  -6  10 1701.73 164.456   7
  -1  -6 -10 1489.83 148.345   6
   1  -6  11 784.652 125.084  12
   1   6  11 642.034 80.5742   5
  -1   6 -11 739.522 130.210  10
  -1  -6 -11 605.946 107.638   6
   1   6  11 696.922 111.228   8
   1  -6  11 609.866 151.538   2
   1  -6  11 436.693 101.548   7
   1  -6  12 16315.9 535.751  12
  -1   6 -12 15330.5 532.514   1
   1   6  12 15498.0 505.170   8
  -1  -6 -12 15635.7 508.745   6
   1   6  12 15388.7 421.054   5
  -1   6 -12 16070.1 558.072  10
   1  -6  12 16270.2 603.133   2
   1  -6  12 16458.7 544.362   7
  -1   6 -13 309.842 108.758  10
  -1  -6 -13 255.346 89.3991   6
   1   6  13 358.842 94.2247   8
  -1  -6 -13 271.946 48.8059   3
   1  -6  13 192.969 122.116   2
   1   6  13 327.438 72.0472   5
   1  -6  13 115.718 98.2597   7
  -1   6 -13 320.280 118.654   1
   1  -6  13 142.749 95.1645  12
   1  -6  14 540.829 152.089   2
   1  -6  14 314.115 125.357   7
   1   6  14 273.452 69.5681   5
  -1  -6 -14 312.862 44.7195   3
  -1   6 -14 504.529 135.124  10
  -1  -6 -14 214.524 86.2608   6
   1   6  14 349.328 103.762   8
  -1   6 -14 549.607 144.378   1
   1  -6  14 225.226 106.836  12
   1   6  15 9263.37 328.272   5
   1  -6  15 10362.4 500.753   2
   1   6  15 9723.00 408.732   8
  -1  -6 -15 9344.24 248.269   3
   1  -6  15 9367.90 435.616   7
  -1   6 -15 9397.41 448.722  10
  -1   6 -15 10025.4 444.668   1
   1  -6  15 9613.41 434.325  12
  -1  -6 -15 8996.96 396.780   6
  -1  -6 -16 14534.0 526.935   6
  -1  -6 -16 14805.0 600.999   1
  -1  -6 -16 13633.1 310.952   3
   1   6  16 14502.4 441.446   5
   1  -6  16 14157.3 605.783   2
   1  -6  16 14419.6 559.051   7
  -1   6 -16 14912.4 566.255   1
   1   6  16 15324.9 533.697   8
  -1   6 -16 13852.8 566.370  10
   1  -6  16 13819.4 555.069  12
  -1  -6 -17 15881.9 636.918   1
  -1  -6 -17 16033.0 572.454   6
  -1   6 -17 14963.5 589.540   1
   1  -6  17 16656.1 668.632   2
   1   6  17 16444.7 488.866   5
  -1   6 -17 15853.7 632.516  10
   1  -6  17 16149.9 613.806   7
   1   6  17 16216.5 571.400   8
   1  -6  17 15487.7 615.212  12
   1  -6  18 1940.51 230.132   7
  -1  -6 -18 2024.20 197.931   6
   1   6  18 1871.82 199.439   8
  -1   6 -18 1856.08 228.305   1
  -1   6 -18 1570.07 222.362  10
   1   6  18 1721.82 151.747   5
   1  -6  18 2178.31 234.713  12
   1  -6  18 2143.08 254.945   2
  -1  -6 -18 1851.44 233.867   1
   1  -6  19 3767.91 317.064  12
  -1   6 -19 3783.18 311.882   1
  -1  -6 -19 4248.98 341.972   1
   1  -6  19 3823.78 315.953   7
   1   6  19 3381.00 269.185   8
   1  -6  19 4447.53 358.878   2
  -1   6 -19 3530.84 309.487  10
   1   6  19 3567.66 219.637   5
   1   6  20 9471.85 377.926   5
  -1  -6 -20 9025.14 502.248   1
   1  -6  20 8716.64 503.002   2
   1  -6  20 9153.18 484.052   7
   1   6  20 8909.54 441.087   8
   1  -6  20 8940.63 487.211  12
  -1   6 -20 8837.71 471.935   1
   1  -6  21 4000.25 348.220  12
   1  -6  21 4467.52 382.324   2
   1   6  21 4352.80 325.031   8
  -1  -6 -21 4261.58 375.638   1
   1  -6  21 4166.97 342.553   7
  -1   6 -21 3968.14 344.870   1
   1   6  21 4067.23 251.891   5
   1   6  22 20413.2 634.513   5
   1  -6  22 19774.2 801.104  12
   1   6  22 21036.2 736.021   8
   1  -6  22 21177.6 834.889   2
  -1  -6 -22 20254.1 820.336   1
  -1   6 -22 21306.8 788.274   1
   1  -6  22 21321.3 799.833   7
   1   6  23 13606.5 506.117   5
  -1  -6 -23 14088.5 681.408   1
   1   6  23 13642.9 586.231   8
   1  -6  23 14293.6 681.810   2
   1  -6  23 14248.8 670.852  12
   1  -6  23 13755.8 646.187   7
  -1   6 -23 14348.3 644.540   1
   1  -6  24 1067.38 239.702   2
   1  -6  24 1087.48 235.129  12
   1  -6  24 1116.57 244.997   7
   1   6  24 1367.85 223.578   8
   1   6  24 747.114 137.635   5
  -1   6 -24 1221.13 238.623   1
  -1  -6 -24 786.717 220.414   1
   1   6  25 9531.61 513.270   8
   1  -6  25 9813.77 586.372   2
  -1  -6 -25 8755.11 559.192   1
  -1   6 -25 9955.50 555.373   1
   1   6  25 9256.84 425.068   5
   1  -6  25 10578.4 586.227   7
   1  -6  25 9429.20 566.591  12
   1  -6  26 30728.6 1093.30   2
   1  -6  26 29083.3 1046.60   7
   1  -6  26 29184.1 1069.86  12
  -1   6 -26 29746.7 1035.06   1
  -1  -6 -26 30026.4 1087.82   1
   1   6  26 29198.0 855.583   5
   1   6  26 27846.3 949.639   8
   1  -6  27 1852.65 312.925   7
   1  -6  27 1159.07 287.164   2
   1   6  27 507.323 154.198   5
  -1  -6 -27 933.003 259.936   1
  -1   6 -27 1584.88 285.772   1
   1  -6  27 969.712 270.414  12
   1   6  27 1534.04 263.709   8
   1  -6  28 18149.8 846.405  12
   1  -6  28 16895.5 796.459   7
  -1  -6 -28 18093.8 833.479   1
  -1   6 -28 15981.4 757.155   1
   1  -6  28 19115.3 856.419   2
   1   6  28 16925.1 724.315   8
  -1   6 -29 1752.61 276.778   1
   1  -6  29 1311.90 294.384  12
   1   6  29 1309.87 257.008   8
  -1  -6 -29 1376.96 258.540   1
   1  -6  29 2353.25 327.865   7
   1  -6  29 1782.48 311.512   2
  -1  -6 -30 838.257 255.678   1
   1  -6  30 861.623 243.866   7
   1   6  30 930.695 212.733   8
   1  -6  30 875.164 253.323  12
  -1   6 -30 767.231 228.052   1
   1  -6  30 821.883 253.710   2
  -1  -6 -31 3693.13 412.084   1
   1  -6  31 3513.96 421.843  12
  -1   6 -31 4355.62 422.284   1
   1   6  31 3597.18 356.977   8
   1  -6  31 3922.53 411.751   2
   1  -6  31 4001.81 422.125   7
   1  -6  32 3465.18 400.661   2
  -1  -6 -32 2945.30 384.446   1
   1  -6  32 2977.54 381.925   7
  -1   6 -32 2824.46 356.871   1
   1  -6  32 2816.45 392.288  12
   1   6  32 3157.85 348.911   8
   1  -6  33 8413.29 616.544   7
  -1   6 -33 8658.09 597.381   1
  -1  -6 -33 9107.67 566.048   6
  -1  -6 -33 8863.98 625.507   1
   1  -6  33 9468.64 642.304   2
   1  -6  33 8715.19 641.832  12
   1   6  33 9202.24 572.527   8
  -1  -6 -34 2021.48 300.084   6
  -1   6 -34 1439.87 292.049   1
   1   6  34 1959.35 300.927   8
   1  -6  34 2357.98 381.383  12
   1  -6  34 1830.66 336.905   7
  -1  -6 -34 1852.71 309.565   1
   1  -6  34 2419.68 371.682   2
   1   6  35 449.527 202.590   8
  -1  -6 -35 288.882 183.338   6
  -1  -6 -35 606.326 212.894   1
   1  -6  35 492.510 255.016  12
  -1   6 -35 573.462 216.018   1
   1  -6  35 336.773 243.260   7
   1  -6  36 338.762 235.323   7
  -1  -6 -36-15.7374 201.879   1
   1   6  36 137.328 181.140   8
   1  -6  36 295.811 226.444  12
  -1   6 -36 457.614 225.904   1
   1  -6  37 1879.28 343.295   7
  -1   6 -37 2025.01 346.465   1
   1   7 -38 2005.30 322.177   1
   1   7 -37 1337.82 279.702   1
  -1   7  37 722.687 267.049  12
   1  -7 -37 866.791 245.012   1
   1   7 -36 2625.64 343.584   1
  -1   7  36 2587.74 400.231  12
   1  -7 -36 2351.69 336.710   1
  -1  -7  36 2499.58 399.698   7
  -1  -7  35 1212.33 297.620   7
   1   7 -35 1293.02 263.979   1
  -1   7  35 1397.94 312.753  12
   1  -7 -35 736.845 224.559   1
   1  -7 -34-139.316 184.378   1
   1   7 -34 147.599 160.980   1
  -1   7  34 581.396 269.236  12
  -1  -7  34-192.308 205.172  12
  -1  -7  34-6.94484 216.446   7
  -1   7  33 183.715 175.887   5
  -1   7  33 387.141 245.153  12
  -1  -7  33 208.367 239.465   7
   1  -7 -33 290.991 166.076   1
  -1  -7  33 566.262 275.972  12
   1   7 -33 280.790 170.914   1
   1  -7 -32 3820.60 407.242   1
  -1  -7  32 4516.16 458.738  12
   1   7 -32 4761.90 411.415   1
  -1   7  32 4931.39 401.573   5
  -1   7  32 5163.33 509.501  12
  -1  -7  32 4354.41 463.650   7
  -1  -7  31 7087.71 561.963  12
  -1   7  31 7400.74 476.870   5
  -1   7  31 7309.73 589.666  12
   1  -7 -31 7730.76 559.040   1
   1   7 -31 7366.93 500.195   1
  -1  -7  31 7989.72 590.437   7
  -1  -7  30 561.240 243.117  12
  -1   7  30 472.532 168.447   5
   1  -7 -30 432.634 195.173   1
  -1   7  30 515.877 241.119  12
   1   7 -30 772.092 219.414   1
  -1  -7  30 505.187 228.320   7
  -1  -7  29 2013.52 329.451   7
   1  -7 -29 2320.51 321.584   1
  -1   7  29 2226.79 275.227   5
  -1  -7  29 2595.98 349.935  12
  -1   7  29 2683.46 372.657  12
   1   7 -29 2520.76 293.139   1
  -1  -7  28 5626.29 468.223  12
  -1   7  28 5634.92 355.241   8
   1   7 -28 4963.54 391.494   1
   1  -7 -28 5400.28 449.416   1
  -1   7  28 6216.05 512.480  12
  -1   7  28 5338.99 392.888   5
  -1  -7  28 5136.63 454.602   7
  -1  -7  27 7573.66 536.781  12
   1  -7 -27 7296.44 516.403   1
  -1   7  27 7614.22 408.475   8
  -1   7  27 7779.28 461.137   5
   1   7 -27 8075.22 484.561   1
  -1  -7  27 7673.33 546.761   7
  -1  -7  26 23616.2 955.902  12
  -1  -7  26 26112.8 1007.48   7
   1  -7 -26 26143.1 984.311   1
  -1   7  26 25268.3 870.145   5
  -1   7  26 26955.1 813.881   8
   1   7 -26 26300.9 898.779   1
  -1  -7  25 1692.22 299.577   7
   1   7 -25 3060.82 296.572   1
  -1   7  25 2346.79 220.737   8
  -1  -7  25 2527.85 317.418  12
   1  -7 -25 2209.52 276.443   1
  -1   7  25 2531.08 288.961   5
  -1   7  24 1171.36 163.176   8
  -1  -7  24 1329.38 250.881  12
   1  -7 -24 1285.85 230.623   1
   1   7 -24 1095.74 194.772   1
  -1  -7  24 1442.88 266.095   7
  -1   7  24 1300.66 209.800   5
   1   7 -23 16609.9 641.567   1
   1  -7 -23 15763.0 697.148   1
  -1   7  23 15350.8 553.113   8
  -1  -7  23 15100.4 702.363   7
  -1  -7  23 16219.2 715.850  12
  -1   7  23 16110.2 629.502   5
  -1  -7  22 18233.4 756.846  12
  -1  -7  22 18899.9 776.720   7
   1   7 -22 18738.3 682.206   1
  -1   7  22 18560.4 674.522   5
  -1   7  22 17974.6 594.462   8
   1  -7 -22 18747.5 752.960   1
  -1   7  21 4204.97 310.196   5
   1   7 -21 4324.71 321.359   1
  -1  -7  21 4566.52 373.526  12
  -1   7  21 4389.13 263.564   8
  -1  -7  21 3964.28 362.374   7
  -1   7  20 14045.1 486.852   8
   1   7 -20 14006.1 631.795  10
  -1  -7  20 14558.5 640.422   7
  -1  -7  20 14459.6 629.676  12
   1   7 -20 14105.3 551.996   1
  -1   7  20 14454.0 561.458   5
  -1   7  19 3495.81 274.333   5
   1   7 -19 3467.08 264.474   1
  -1   7  19 3551.87 225.177   8
  -1  -7  19 3884.35 323.733  12
   1   7 -19 3509.03 315.938  10
  -1  -7  19 4272.44 351.854   7
   1   7 -18 25829.9 862.929  10
   1  -7 -18 25786.7 529.046   3
  -1   7  18 26147.0 778.399   5
   1   7 -18 26205.3 770.326   1
  -1  -7  18 26989.1 871.575   7
  -1   7  18 26058.5 686.250   8
  -1   7  17 1703.82 196.618   5
  -1  -7  17 1531.76 219.946   7
   1   7 -17 1593.58 221.465  10
  -1   7  17 1551.68 142.027   8
  -1   7  16 13079.5 498.506   5
  -1  -7  16 13694.4 570.614   7
  -1   7  16 13261.6 426.385   8
   1   7 -16 14537.0 579.375  10
  -1  -7  15 19136.1 676.807   7
   1   7 -15 18617.0 665.021  10
  -1   7  15 19355.3 523.233   8
  -1   7  15 19201.0 608.898   5
  -1   7  14 2361.01 153.138   8
  -1  -7  14 2550.60 230.064   7
   1   7 -14 1960.96 217.189  10
  -1   7  14 2266.63 193.334   5
  -1   7  13 6402.63 311.322   5
   1   7 -13 6784.50 354.151  10
  -1   7  13 6673.38 252.735   8
  -1  -7  13 6516.23 356.502   7
   1  -7 -12 245.855 108.504   6
  -1   7  12 15.9386 78.3895   5
   1   7 -12 45.4349 105.847  10
  -1  -7  12 9.61773 101.088   7
  -1   7  12 93.3814 47.1362   8
  -1   7  11 724.362 120.372   5
  -1   7  11 752.428 80.3704   8
   1   7 -11 828.045 142.352  10
  -1  -7  11 792.178 144.639   7
   1  -7 -11 724.691 139.212   6
  -1   7  10 65259.5 1236.22   8
  -1  -7  10 67104.9 1428.66   7
   1   7 -10 67335.1 1425.45  10
   1  -7 -10 63808.7 1410.88   6
  -1   7  10 62629.3 1360.68   5
  -1  -7   9 3288.72 232.313   7
   1  -7  -9 3416.77 110.170   9
   1  -7  -9 3551.97 155.792   8
   1   7  -9 2953.39 215.349  10
   1  -7  -9 3235.37 226.833   6
  -1   7   9 3153.26 152.024   8
   1  -7  -8 46081.2 1062.10   6
   1   7  -8 42442.2 1068.85   8
  -1   7   8 46785.5 914.427   8
   1  -7  -8 47649.6 911.381   8
  -1  -7   8 47372.2 1069.47   7
   1   7  -8 45496.1 1055.83  10
   1   7  -7 62.4964 76.3596  10
   1  -7  -7 68.3273 84.4924   6
  -1   7   7 41.5325 38.3743   8
  -1  -7   7 47.4492 84.2897   7
   1  -7  -7 33.3925 32.9025   8
   1   7  -7 124.785 93.6619   8
  -1   7   6 67.8061 45.0818   8
  -1  -7   6-3.68322 75.8905   7
   1  -7  -6-51.9952 61.3011   4
   1  -7  -6 35.6639 31.5925   8
   1   7  -6 66.4116 83.5262  10
   1   7  -6 10.1295 75.5842   8
   1  -7  -6 163.304 91.3763   6
   1  -7  -5 96835.3 1879.17   6
   1   7  -5 102274. 1920.17   8
  -1   7   5 97207.7 1751.95   8
   1  -7  -5 98356.1 1739.45   8
  -1  -7   5 99895.4 1871.51   7
   1   7  -5 92799.5 1857.66  10
   1  -7  -5 94483.1 1793.57   4
  -1   7   4 46325.1 939.231  11
   1   7  -4 44163.8 1004.42  10
   1   7  -4 47515.8 1049.77   8
  -1  -7   4 45341.0 1002.89   7
  -1   7   4 47203.0 1014.29  10
   1  -7  -4 46830.0 1022.88   6
   1  -7  -4 46767.0 910.434   8
  -1   7   4 46803.1 923.956   8
   1  -7  -4 48031.7 955.890   4
  -1  -7   3 39736.2 911.347   6
   1   7  -3 42120.2 932.919   8
  -1  -7   3 38315.6 876.573   7
   1  -7  -3 39389.3 902.210   6
  -1   7   3 40635.7 828.992  11
   1  -7  -3 39990.4 807.483   8
  -1   7   3 38727.1 892.583  10
  -1   7   3 38959.9 817.678   8
  -1   7   3 41009.6 872.926   2
   1   7  -3 42536.3 903.855  10
   1  -7  -3 39596.3 838.018   4
  -1  -7   2 64248.1 1334.54   6
  -1  -7   2 66700.6 1310.00   7
   1  -7  -2 66854.4 1268.72   4
   1  -7  -2 67464.5 1333.69   6
   1   7  -2 65141.3 1314.03  10
  -1   7   2 67978.4 1317.77   2
  -1   7   2 65092.1 1321.11  10
  -1   7   2 68679.7 1254.43  11
  -1   7   2 65300.8 1259.72   8
   1  -7  -2 62782.1 1237.87   8
   1   7  -2 60638.9 1327.22   8
  -1   7   1 5751.95 252.319  10
   1  -7  -1 5346.37 210.923   8
   1  -7  -1 5391.71 246.402   6
   1   7  -1 5012.81 232.012  10
  -1   7   1 5105.32 204.008  11
  -1  -7   1 5248.98 250.985   6
   1   7  -1 4854.08 245.137   8
  -1   7   1 5473.12 219.349   8
   1  -7  -1 5542.90 208.351  11
   1  -7   0 3425.31 171.873   8
   1   7   0 3209.63 186.421  10
  -1   7   0 3474.16 179.539   8
  -1   7   0 3568.84 197.804  10
  -1   7   0 3388.30 164.632  11
   1  -7   0 3455.85 163.522  11
   1   7   0 3321.19 200.289   8
  -1  -7   0 3627.94 205.926   6
   1  -7   0 3443.01 192.170   6
   1  -7   1 10597.1 355.164   6
  -1   7  -1 9930.72 352.711  10
  -1   7  -1 10681.1 241.142  12
  -1  -7  -1 10060.3 358.911   6
   1  -7   1 10825.0 318.510  11
   1   7   1 8890.10 332.503  10
   1   7   1 10954.1 367.156   8
  -1   7  -2 35100.4 656.690  12
   1   7   2 35287.6 790.714  10
   1  -7   2 32249.1 777.020   6
   1   7   2 35490.8 797.065   8
  -1  -7  -2 34018.3 794.782   6
  -1   7  -2 34357.2 796.577  10
  -1  -7  -2 33624.0 615.569   4
   1   7   3 36764.5 843.272  10
   1  -7   3 37582.5 840.840   6
  -1   7  -3 37593.5 734.993  12
  -1  -7  -3 37299.2 853.536   6
   1   7   3 37987.2 850.372   8
  -1   7  -3 37416.0 860.585  10
   1  -7   4 1004.01 117.791   6
  -1   7  -4 795.740 111.664  10
   1  -7   4 755.294 127.626   2
   1  -7   4 740.915 110.142   7
   1   7   4 915.241 108.012   8
  -1  -7  -4 756.882 108.386   6
   1   7   4 898.469 119.057  10
   1   7   5 34882.9 843.660   8
  -1  -7  -5 41698.1 847.249   9
   1  -7   5 37146.0 851.404   6
   1  -7   5 37635.3 933.469   2
  -1   7  -5 36816.0 875.530  10
  -1  -7  -5 39054.1 874.482   6
   1  -7   5 36537.9 870.923   7
   1   7   6 811.159 108.521   8
  -1  -7  -6 591.168 87.8829   9
  -1  -7  -6 664.192 76.7961   5
   1  -7   6 671.427 142.832   2
  -1  -7  -6 737.328 108.705   6
   1  -7   6 761.189 114.911   7
   1   7   6 715.197 43.0476   4
  -1   7  -6 936.678 127.923  10
   1   7   7 44269.6 961.409   8
  -1  -7  -7 42807.2 907.253   9
  -1  -7  -7 43850.1 974.021   6
  -1  -7  -7 42733.2 868.091   5
   1  -7   7 42962.4 985.087   7
  -1   7  -7 39658.5 975.680  10
   1  -7   7 42513.4 1048.77   2
   1  -7   7 41497.4 889.639  12
   1   7   7 43595.6 780.741   4
   1  -7   8 347.174 136.035   2
   1   7   8 171.105 35.5943   4
  -1   7  -8 83.5547 86.1736  10
  -1  -7  -8 52.0448 70.4847   6
   1   7   8 85.9981 68.2758   8
   1  -7   8 154.623 93.4233   7
  -1  -7  -8 142.560 61.8956   9
  -1  -7  -8 75.2632 38.8085   5
   1  -7   8 197.114 69.8307  12
  -1  -7  -9 2821.28 195.298   6
  -1   7  -9 3007.16 216.204  10
   1  -7   9 2897.93 252.076   2
   1  -7   9 2363.15 193.373   7
  -1  -7  -9 3110.39 155.332   5
   1   7   9 2806.00 189.239   8
   1  -7   9 3069.53 188.355  12
  -1  -7  -9 2807.55 165.809   9
   1  -7  10 20281.2 666.048   2
  -1  -7 -10 17752.7 490.615   9
   1   7  10 19667.5 566.975   8
   1  -7  10 19364.7 557.734  12
  -1  -7 -10 19035.2 483.175   5
  -1   7 -10 19666.1 609.531  10
   1  -7  10 18756.7 593.822   7
  -1  -7 -10 19597.3 578.456   6
  -1  -7 -11 377.426 64.0466   5
  -1   7 -11 248.132 110.557  10
   1  -7  11 418.426 111.644   7
   1  -7  11 399.072 97.3725  12
  -1  -7 -11 521.422 108.482   6
   1   7  11 327.716 93.1535   8
   1  -7  11 746.319 164.404   2
  -1  -7 -12 27.5844 80.7893   6
  -1   7 -12 184.186 118.286  10
   1  -7  12 173.545 114.419   7
   1  -7  12 150.146 92.2688  12
   1  -7  12 204.964 132.635   2
   1   7  12 248.931 86.3149   8
  -1  -7 -13 5315.83 290.639   6
   1  -7  13 5791.69 372.907   2
   1   7  13 5643.05 294.803   8
   1  -7  13 5820.87 328.162   7
  -1   7 -13 5860.29 334.823  10
   1  -7  13 5478.88 307.052  12
   1  -7  14 34345.6 937.143  12
   1  -7  14 36139.4 971.117   7
  -1  -7 -14 36094.4 746.270   3
   1   7  14 35209.1 809.397   5
   1   7  14 36050.1 916.578   8
  -1  -7 -14 36923.0 932.679   6
  -1   7 -14 36158.1 991.632  10
   1  -7  14 36214.0 1039.06   2
   1  -7  15 9899.00 442.466  12
   1   7  15 10221.8 420.166   8
  -1  -7 -15 9585.03 277.014   3
   1  -7  15 10077.9 504.952   2
  -1   7 -15 10003.0 469.126  10
   1   7  15 9387.26 336.748   5
   1  -7  15 9723.66 448.328   7
  -1  -7 -15 9500.02 420.797   6
   1  -7  16 14546.7 622.992   2
   1   7  16 14906.2 452.411   5
   1  -7  16 14707.2 579.122   7
   1   7  16 14197.0 525.942   8
  -1   7 -16 15116.7 606.279  10
  -1  -7 -16 14360.4 350.685   3
  -1   7 -16 14579.3 576.505   1
  -1  -7 -16 14782.0 541.424   6
   1  -7  16 15203.9 578.652  12
   1   7  17 3434.77 257.248   8
  -1  -7 -17 5118.50 372.293   1
   1  -7  17 4309.79 308.447  12
  -1   7 -17 4102.45 314.284   1
  -1   7 -17 3916.20 306.321  10
  -1  -7 -17 3793.56 270.458   6
  -1  -7 -17 3707.52 136.341   3
   1   7  17 3933.65 217.543   5
   1  -7  17 3835.61 336.036   2
   1  -7  17 3953.50 307.202   7
   1   7  18 96.8785 72.4422   5
   1  -7  18 365.765 146.884  12
  -1   7 -18 497.572 161.760   1
  -1  -7 -18 192.197 137.488   1
  -1   7 -18 18.9926 138.365  10
  -1  -7 -18 161.486 118.302   6
   1   7  18 135.862 109.897   8
   1  -7  18 337.127 168.603   2
   1  -7  18 98.1474 133.061   7
  -1  -7 -19 8865.70 491.083   1
   1  -7  19 7521.70 433.075  12
  -1   7 -19 7399.44 441.078  10
  -1  -7 -19 8138.75 419.936   6
  -1   7 -19 7974.33 444.434   1
   1  -7  19 7856.12 444.121   7
   1  -7  19 7764.57 481.552   2
   1   7  19 7890.08 402.357   8
   1   7  19 7574.68 330.897   5
  -1   7 -20 7791.03 463.566  10
   1  -7  20 7118.75 443.583   7
  -1  -7 -20 7683.71 416.695   6
   1  -7  20 8332.64 503.552   2
  -1   7 -20 8266.51 457.881   1
   1   7  20 8204.95 419.767   8
  -1  -7 -20 7808.32 467.983   1
   1   7  20 8392.19 353.309   5
   1  -7  20 7646.91 455.053  12
   1   7  21 526.847 151.798   8
   1   7  21 835.094 132.294   5
   1  -7  21 641.971 190.406  12
   1  -7  21 884.234 220.550   2
  -1   7 -21 645.190 179.646   1
  -1  -7 -21 755.658 193.642   1
   1  -7  21 524.121 173.682   7
  -1  -7 -21 639.859 181.864   6
   1  -7  22 7783.06 507.010   2
   1   7  22 8386.21 439.687   8
  -1  -7 -22 7420.21 425.483   6
  -1   7 -22 7572.66 463.278   1
   1   7  22 7946.87 360.765   5
  -1  -7 -22 7566.35 497.605   1
   1  -7  22 8283.08 493.689   7
   1  -7  22 8039.03 481.417  12
   1   7  23 1730.00 186.225   5
   1   7  23 1443.70 218.458   8
   1  -7  23 1657.16 251.648  12
  -1  -7 -23 1502.97 218.146   6
  -1  -7 -23 1499.80 259.223   1
   1  -7  23 1819.07 282.155   2
   1  -7  23 1965.43 272.823   7
  -1   7 -23 1582.94 249.993   1
   1  -7  24 473.244 197.710   7
  -1  -7 -24 222.330 145.837   6
   1   7  24 418.022 148.585   8
   1  -7  24 576.783 210.780   2
  -1  -7 -24 81.4003 146.629   1
  -1   7 -24 291.734 150.825   1
   1  -7  24 464.662 187.408  12
   1   7  24 427.732 115.288   5
  -1   7 -25 1088.92 226.042   1
   1   7  25 975.300 145.415   5
  -1  -7 -25 925.120 232.745   1
   1  -7  25 748.910 204.101  12
   1   7  25 760.426 182.114   8
   1  -7  25 885.789 207.926   7
  -1  -7 -25 961.764 199.297   6
   1  -7  25 1300.57 268.754   2
   1  -7  26 5217.10 446.738   2
   1   7  26 4912.63 310.842   5
   1   7  26 4498.40 357.583   8
  -1  -7 -26 4897.20 373.868   6
  -1   7 -26 4384.59 383.518   1
  -1  -7 -26 4868.19 422.863   1
   1  -7  26 4573.64 414.210  12
   1  -7  26 4907.54 420.749   7
   1  -7  27 1431.99 280.106   2
   1  -7  27 920.629 229.739   7
  -1  -7 -27 754.913 194.116   6
  -1   7 -27 878.758 225.707   1
   1   7  27 1293.56 224.040   8
   1  -7  27 941.220 230.356  12
  -1  -7 -27 844.911 225.798   1
  -1   7 -28 1318.54 261.018   1
  -1  -7 -28 879.204 241.758   1
  -1  -7 -28 1318.05 245.411   6
   1  -7  28 1204.59 279.023   2
   1   7  28 1370.78 248.954   8
   1  -7  28 1299.47 277.860  12
   1  -7  28 1182.22 257.047   7
   1   7  29 8834.38 522.980   8
  -1  -7 -29 7852.01 499.726   6
   1  -7  29 9621.97 614.089  12
   1  -7  29 9513.80 617.779   2
  -1   7 -29 8343.41 551.093   1
  -1  -7 -29 8319.84 586.049   1
   1  -7  29 8233.27 567.695   7
  -1  -7 -30 4627.97 446.616   1
   1  -7  30 4840.63 456.251   7
  -1   7 -30 4293.09 418.785   1
  -1  -7 -30 4686.42 398.655   6
   1   7  30 4142.03 386.103   8
   1  -7  30 5148.03 481.464   2
   1  -7  30 5057.52 474.960  12
  -1  -7 -31 6751.50 480.914   6
  -1   7 -31 6981.92 529.563   1
   1  -7  31 7722.59 570.858   2
   1  -7  31 6983.23 545.862   7
   1  -7  31 6252.65 525.329  12
  -1  -7 -31 6560.36 538.877   1
   1   7  31 6567.04 473.776   8
   1  -7  32 2814.97 377.788   7
  -1  -7 -32 2726.57 380.002   1
   1  -7  32 3015.20 403.560   2
   1   7  32 2783.92 325.155   8
  -1   7 -32 3162.22 376.430   1
  -1  -7 -32 2770.62 329.751   6
   1  -7  32 3020.04 400.883  12
   1   7  33 2145.03 306.706   8
  -1  -7 -33 2283.25 349.003   1
   1  -7  33 1890.59 327.377   7
  -1   7 -33 2298.24 332.656   1
  -1  -7 -33 2290.38 305.802   6
   1  -7  33 2048.39 349.419  12
  -1   7 -34 3215.42 389.742   1
   1  -7  34 3740.82 454.503  12
  -1  -7 -34 3082.19 349.262   6
   1   7  34 3520.11 371.680   8
  -1  -7 -34 2453.47 356.525   1
   1  -7  34 2798.95 395.619   7
  -1   7 -35 3824.27 425.486   1
  -1  -7 -35 4263.08 424.797   6
  -1  -7 -35 4570.24 475.406   1
   1  -7  35 4385.30 468.042   7
   1  -7  35 5044.47 516.571  12
   1  -7  36 1468.87 326.532   7
  -1   7 -36 2053.73 339.060   1
   1  -7  36 1229.72 316.747  12
   1  -8 -37 1246.91 282.523   6
  -1   8  37 1724.05 381.015  12
   1  -8 -36 182.758 167.565   1
  -1   8  36 316.703 268.170  12
  -1  -8  36 320.269 260.899   7
   1  -8 -36 559.736 239.314   6
   1  -8 -35-76.2523 177.405   1
  -1  -8  35-195.261 258.428   7
  -1   8  35 487.972 275.974  12
   1  -8 -34 11625.9 724.538   1
  -1   8  34 11410.7 771.117  12
  -1  -8  34 9908.05 694.230   7
  -1   8  33 7527.32 621.952  12
  -1  -8  33 8156.07 622.142   7
   1  -8 -33 6544.03 540.059   1
   1   8 -33 7687.88 526.405   1
  -1   8  32 2789.05 410.390  12
   1  -8 -32 2389.84 343.063   1
  -1   8  32 2666.30 310.244   5
   1   8 -32 2807.55 333.350   1
  -1  -8  32 2671.04 394.644   7
  -1   8  31 391.570 229.017  12
  -1  -8  31 992.747 282.475   7
  -1   8  31 1268.32 240.031   5
   1  -8 -31 470.465 190.779   1
   1   8 -31 1161.00 253.338   1
   1   8 -30 9974.15 563.769   1
   1  -8 -30 8496.42 594.109   1
  -1   8  30 8829.98 623.855  12
  -1  -8  30 8082.00 587.092   7
  -1   8  30 9229.85 530.433   5
   1  -8 -29 1417.85 276.201   1
   1   8 -29 1749.90 255.212   1
  -1  -8  29 1300.35 290.006   7
  -1   8  29 1823.91 258.638   5
  -1   8  29 1560.45 302.589  12
   1  -8 -28-1.88776 173.303   1
  -1  -8  28-77.8894 185.088   7
   1   8 -28 219.656 161.722   1
  -1   8  28 79.3824 158.543   5
  -1  -8  27 3681.81 399.256   7
  -1   8  27 3813.61 337.665   5
   1   8 -27 4336.68 357.456   1
  -1   8  27 3715.25 281.226   8
   1  -8 -27 3790.17 378.216   1
  -1  -8  26 2372.68 336.960   7
  -1   8  26 1670.20 254.318   5
   1   8 -26 1868.61 249.568   1
  -1   8  26 1735.54 197.382   8
   1  -8 -26 1440.96 261.682   1
  -1   8  25 2631.73 233.804   8
   1   8 -25 2699.81 270.406   1
   1  -8 -25 2131.61 282.628   1
  -1  -8  25 2636.86 330.080   7
  -1   8  25 2771.52 281.393   5
  -1   8  24 5096.28 305.301   8
  -1  -8  24 5282.26 425.735   7
   1  -8 -24 4834.48 394.427   1
  -1   8  24 5262.49 353.476   5
   1  -8 -23 2727.95 316.071   1
  -1   8  23 2526.45 217.078   8
  -1   8  23 2578.80 258.101   5
  -1  -8  23 2256.20 292.818   7
  -1   8  22 5642.20 307.577   8
  -1   8  22 5842.69 371.816   5
   1   8 -22 5620.19 431.857  10
  -1  -8  22 5640.76 426.326   7
  -1   8  21 14488.3 578.228   5
  -1   8  21 14616.5 509.921   8
  -1  -8  21 15386.1 685.124   7
   1   8 -21 14004.7 658.410  10
  -1  -8  20 4904.41 381.521   7
  -1   8  20 4463.83 259.718   8
   1   8 -20 3914.93 359.370  10
  -1   8  20 4658.20 311.274   5
  -1   8  19 10580.4 469.925   5
  -1  -8  19 9940.60 527.458   7
  -1   8  19 10528.7 397.268   8
   1  -8 -19 10654.6 275.178   3
   1   8 -19 10741.5 551.005  10
   1   8 -18 197.437 149.261  10
  -1   8  18 518.313 101.950   8
  -1   8  18 322.416 116.101   5
  -1  -8  18 293.207 154.582   7
  -1   8  17 23291.0 619.584   8
   1  -8 -17 22099.6 760.575   6
   1   8 -17 24187.6 814.084  10
  -1   8  17 22194.0 704.248   5
  -1  -8  17 22874.8 793.720   7
  -1   8  16 508.350 92.1061   8
  -1  -8  16 405.519 154.349   7
   1  -8 -16 451.934 150.798   6
  -1   8  16 267.971 116.747   5
   1   8 -16 604.040 170.176  10
   1   8 -15 41301.5 1111.60  10
  -1  -8  15 41655.6 1120.30   7
   1  -8 -15 40310.4 1084.94   6
  -1   8  15 39899.2 1016.28   5
  -1   8  15 41348.6 911.081   8
   1   8 -14 10.6472 125.224  10
  -1   8  14 38.9772 53.2516   8
   1  -8 -14 81.1942 123.612   6
  -1   8  14-56.8647 90.9833   5
  -1  -8  14 141.987 128.292   7
  -1   8  13 46316.1 974.974   8
  -1   8  13 46130.0 1098.22   5
  -1  -8  13 46703.6 1171.05   7
   1   8 -13 46380.6 1170.84  10
   1  -8 -13 46364.0 1159.34   6
   1   8 -12 3533.19 268.407  10
   1  -8 -12 3953.43 275.313   6
  -1   8  12 3386.87 232.929   5
  -1  -8  12 3843.27 276.224   7
  -1   8  12 3579.27 181.544   8
  -1   8  11 2726.31 149.495   8
   1   8 -11 2095.95 219.792  10
   1  -8 -11 2911.42 230.951   6
  -1  -8  11 3139.47 238.953   7
  -1  -8  10 1121.55 158.443   7
   1   8 -10 1199.05 154.789  10
   1  -8 -10 1290.15 68.5123   9
   1  -8 -10 1335.68 164.840   6
  -1   8  10 1368.01 108.045   8
   1   8  -9 38586.7 975.132  10
   1  -8  -9 39414.4 821.899   8
   1  -8  -9 39606.5 982.236   6
  -1   8   9 39888.9 827.507   8
  -1  -8   9 40790.8 992.961   7
   1   8  -8 2062.36 202.976   8
   1   8  -8 2256.57 185.429  10
   1  -8  -8 1752.66 176.291   6
   1  -8  -8 1968.20 120.363   8
  -1  -8   8 2135.05 185.605   7
  -1   8   8 2131.58 128.250   8
  -1  -8   7 7672.72 340.693   7
   1  -8  -7 7650.73 251.231   8
  -1   8   7 7324.16 256.535   8
   1  -8  -7 7253.69 334.479   6
   1   8  -7 7993.94 364.971   8
   1  -8  -7 8055.67 287.628   4
   1   8  -7 7011.42 332.566  10
   1   8  -6 889.801 139.843   8
  -1   8   6 799.467 83.3845   8
   1  -8  -6 865.716 98.2306   4
   1   8  -6 989.181 129.824  10
   1  -8  -6 847.621 79.8997   8
  -1  -8   6 769.807 122.869   7
   1  -8  -6 931.763 128.984   6
   1   8  -5 724.049 133.753   8
  -1  -8   5 480.432 111.978   7
  -1   8   5 400.353 69.8390   8
   1   8  -5 280.520 97.3913  10
   1  -8  -5 368.654 70.3835   4
  -1   8   5 246.251 100.476  10
   1  -8  -5 421.968 105.884   6
  -1   8   5 420.940 78.0475  11
   1  -8  -5 503.178 65.9432   8
  -1   8   4 6546.55 246.270   8
  -1   8   4 6356.26 293.405  10
   1   8  -4 6276.45 295.369  10
   1  -8  -4 6667.88 302.370   6
   1  -8  -4 6718.73 235.468   8
  -1  -8   4 6247.61 288.232   7
   1   8  -4 6747.61 313.785   8
   1  -8  -4 6579.56 251.996   4
  -1   8   4 6603.42 248.124  11
   1  -8  -3 43.4944 46.6321   8
  -1   8   3-97.3276 93.4400  10
  -1   8   3 8.89544 55.1202  11
   1  -8  -3 27.6920 53.3522   4
  -1   8   3 50.1397 52.2992   8
   1  -8  -3 48.0403 78.9503   6
   1   8  -3 72.5800 77.4428  10
   1   8  -3 22.8852 80.5191   8
  -1  -8   3 100.369 81.2122   7
  -1  -8   3-31.5047 91.6145   6
   1  -8  -2 24935.8 671.475   6
  -1   8   2 25280.1 617.087   8
   1   8  -2 24634.9 679.124   8
  -1  -8   2 26683.0 664.090   7
  -1   8   2 25257.6 589.354  11
   1  -8  -2 25624.7 613.419   4
   1   8  -2 26729.4 674.467  10
  -1  -8   2 26009.6 683.508   6
  -1   8   2 26044.2 671.662  10
   1   8  -1 18790.3 562.171   8
  -1  -8   1 20035.6 570.672   6
  -1   8   1 19329.7 520.911   8
  -1  -8   1 19824.4 385.067  11
   1  -8  -1 19473.2 559.647   6
  -1   8   1 19890.4 492.349  11
   1   8  -1 19106.8 547.136  10
  -1   8   1 19486.6 557.730  10
   1   8   0 1470.85 137.829  10
  -1   8   0 1469.48 141.069  10
  -1   8   0 1286.48 122.076   8
   1  -8   0 1304.89 134.676   6
   1   8   0 1250.85 135.731   8
  -1   8   0 1397.77 112.972  11
  -1  -8   0 1356.62 141.330   6
   1  -8   1 385.364 86.7035   6
   1   8   1 189.691 72.5835  10
  -1  -8  -1 546.882 104.591   6
   1   8   1 363.844 95.8416   8
  -1   8  -1 639.891 107.602  10
  -1   8  -2 22501.2 461.887  12
  -1   8  -2 21370.5 599.389  10
  -1  -8  -2 22105.8 428.327   4
  -1  -8  -2 21495.9 598.507   6
   1   8   2 20770.2 588.125   8
   1  -8   2 21055.7 586.364   6
   1   8   2 19182.2 570.877  10
  -1  -8  -3 23567.8 631.982   6
  -1   8  -3 23419.3 501.952  12
   1  -8   3 22494.2 610.401   6
   1   8   3 24018.0 623.676   8
  -1  -8  -3 22010.8 431.608   4
  -1   8  -3 22417.5 624.458  10
   1   8   3 23928.9 625.341  10
  -1   8  -4 11134.3 311.846  12
  -1   8  -4 11187.6 401.351  10
  -1  -8  -4 10341.4 387.600   6
   1   8   4 11248.2 395.857  10
   1   8   4 10147.6 375.840   8
   1   8   4 11266.5 236.532  11
   1  -8   4 10995.1 403.112   7
   1  -8   4 10794.4 387.168   6
   1   8   5 17967.8 524.596   8
  -1   8  -5 17463.6 541.189  10
   1  -8   5 17455.0 521.766   6
  -1  -8  -5 17915.6 539.303   6
   1   8   5 18329.8 535.017  10
   1  -8   5 17829.2 542.042   7
   1  -8   6 1231.22 136.548   6
   1   8   6 1165.39 128.527   8
   1  -8   6 1155.77 145.393   7
  -1  -8  -6 1103.87 120.327   9
   1  -8   6 1854.56 220.745   2
  -1   8  -6 1154.26 149.064  10
  -1  -8  -6 1044.49 135.827   6
   1   8   7 62971.4 1133.17   4
   1  -8   7 66561.3 1387.79   7
  -1   8  -7 64653.9 1393.25  10
  -1  -8  -7 66622.2 1378.84   6
   1   8   7 64133.8 1340.66   8
   1  -8   7 60520.1 1435.75   2
  -1  -8  -7 67954.0 1302.28   9
   1  -8   8 8048.61 364.426   7
  -1   8  -8 8242.65 364.209  10
   1   8   8 9037.38 353.510   8
   1   8   8 8568.10 220.536   4
  -1  -8  -8 8146.40 301.879   9
   1  -8   8 8797.59 427.624   2
  -1  -8  -8 8765.19 361.208   6
   1  -8   9 40527.2 1067.78   2
  -1  -8  -9 38010.2 873.145   9
  -1   8  -9 41883.9 1008.38  10
  -1  -8  -9 41007.4 978.189   6
   1   8   9 40362.4 947.900   8
   1   8   9 41209.2 777.002   4
   1  -8   9 40055.8 996.505   7
   1  -8   9 39597.8 898.877  12
   1  -8  10 40562.6 923.578  12
   1  -8  10 38304.5 987.303   7
  -1   8 -10 40069.4 1008.24  10
   1  -8  10 40483.2 1083.16   2
  -1  -8 -10 40566.0 975.263   6
   1   8  10 40931.8 788.626   4
  -1  -8 -10 38620.3 866.223   9
   1   8  10 37514.7 934.372   8
  -1  -8 -11 7911.13 296.346   9
   1  -8  11 8951.42 356.752  12
   1  -8  11 8655.93 393.451   7
   1   8  11 8565.33 261.775   4
  -1   8 -11 7471.24 383.958  10
   1   8  11 7933.82 350.871   8
  -1  -8 -11 8501.51 376.021   6
   1  -8  11 7590.14 428.440   2
  -1  -8 -12 1403.83 161.776   6
   1  -8  12 1224.54 146.211  12
  -1   8 -12 1272.09 172.028  10
   1   8  12 1097.25 141.352   8
   1  -8  12 1154.58 190.567   2
   1  -8  12 1271.28 172.262   7
   1  -8  13 743.432 178.205   2
   1  -8  13 569.154 124.962  12
  -1  -8 -13 559.305 123.005   6
  -1   8 -13 693.527 152.070  10
   1   8  13 671.396 118.479   8
   1  -8  13 494.729 137.232   7
   1   8  14 252.365 108.118   8
   1  -8  14 155.217 138.228   2
   1  -8  14 312.222 130.525   7
   1  -8  14 377.882 116.153  12
  -1  -8 -14 321.659 109.534   6
  -1   8 -14 157.746 117.438  10
   1  -8  15 499.593 169.530   2
   1  -8  15 347.779 109.898  12
  -1   8 -15 522.319 151.182  10
   1  -8  15 560.081 155.699   7
  -1  -8 -15 431.992 120.928   6
   1   8  15 522.652 118.991   8
   1  -8  16 826.423 176.818   7
  -1   8 -16 553.309 153.848  10
   1  -8  16 986.230 233.938   2
  -1  -8 -16 650.064 146.254   6
   1   8  16 720.102 142.659   8
  -1  -8 -16 672.753 72.1391   3
   1  -8  16 660.330 154.100  12
  -1   8 -17 22213.0 776.359  10
   1   8  17 20527.8 684.854   8
  -1  -8 -17 20465.8 477.090   3
   1   8  17 21728.1 598.078   5
   1  -8  17 21272.0 723.065  12
   1  -8  17 21784.4 816.927   2
   1  -8  17 21502.1 747.821   7
  -1  -8 -17 21733.5 713.040   6
  -1  -8 -18 1900.98 215.644   6
   1   8  18 1360.13 186.530   8
   1  -8  18 1788.12 268.384   2
   1  -8  18 1360.85 216.324   7
  -1   8 -18 1205.76 213.176  10
   1   8  18 1466.04 147.322   5
   1  -8  18 1893.51 224.992  12
   1   8  19 1704.45 199.401   8
  -1  -8 -19 2250.82 279.188   1
   1  -8  19 2181.00 293.147   2
   1   8  19 2241.08 180.886   5
  -1   8 -19 1734.52 239.672  10
   1  -8  19 1732.46 229.868   7
  -1  -8 -19 2222.30 229.893   6
   1  -8  19 1982.97 230.074  12
   1  -8  20 2388.81 281.546   7
   1  -8  20 2238.62 260.521  12
   1   8  20 2427.52 194.561   5
  -1   8 -20 2165.00 276.683  10
  -1  -8 -20 2368.41 252.084   6
  -1  -8 -20 2462.38 288.584   1
   1   8  20 2219.26 239.690   8
   1  -8  20 2640.83 320.488   2
  -1   8 -21 17911.2 752.159  10
   1  -8  21 18910.6 750.337   7
   1  -8  21 16667.9 706.958  12
   1   8  21 18378.8 668.036   8
   1   8  21 17317.5 563.944   5
  -1  -8 -21 17472.0 756.786   1
   1  -8  21 19711.9 807.646   2
  -1   8 -21 16951.4 701.958   1
  -1  -8 -21 16919.8 664.876   6
   1  -8  22 259.055 152.201  12
  -1  -8 -22 126.694 143.210   1
   1   8  22 392.298 136.392   8
  -1   8 -22 78.4013 168.287  10
  -1   8 -22 496.642 209.799   1
   1  -8  22 389.131 178.367   7
   1   8  22 107.396 78.2244   5
   1  -8  22 407.724 206.170   2
  -1  -8 -22 377.638 161.726   6
  -1   8 -23 444.064 185.584   1
  -1  -8 -23 27.8500 116.353   6
   1  -8  23 210.194 152.751  12
   1   8  23 22.8924 86.9020   5
   1  -8  23 123.173 144.448   7
   1  -8  23 338.465 188.833   2
   1   8  23-34.1040 114.199   8
  -1  -8 -23 142.102 156.996   1
   1   8  24 8323.39 387.165   5
  -1  -8 -24 8311.39 473.570   6
  -1  -8 -24 7616.97 525.282   1
   1   8  24 8141.13 460.069   8
   1  -8  24 8682.61 563.775   2
   1  -8  24 8656.58 530.501  12
   1  -8  24 8078.10 519.428   7
  -1   8 -24 8001.63 499.149   1
   1  -8  25 6152.80 460.848  12
   1  -8  25 6613.09 502.497   2
  -1  -8 -25 6724.66 436.762   6
  -1   8 -25 6677.41 458.973   1
   1  -8  25 6774.98 483.844   7
   1   8  25 6122.36 341.277   5
   1   8  25 6424.32 415.149   8
  -1  -8 -25 6990.80 508.463   1
  -1  -8 -26 4797.41 436.699   1
   1   8  26 4387.14 365.960   8
  -1   8 -26 4831.28 408.311   1
   1  -8  26 5012.81 467.340   2
  -1  -8 -26 4027.70 366.090   6
   1  -8  26 3488.79 423.782   7
   1  -8  26 3893.66 389.830  12
   1  -8  27 45321.6 1454.23   2
   1   8  27 43880.4 1273.09   8
  -1  -8 -27 43465.6 1297.64   6
   1  -8  27 43738.0 1396.49  12
  -1   8 -27 44380.2 1361.83   1
   1  -8  27 46463.2 1418.73   7
  -1  -8 -27 46502.7 1469.75   1
  -1   8 -28 2962.78 381.947   1
   1   8  28 2990.64 324.673   8
  -1  -8 -28 2168.26 356.554   1
   1  -8  28 3775.31 424.220   2
  -1  -8 -28 2761.30 344.830   6
   1  -8  28 3644.36 401.105   7
   1  -8  28 2867.04 348.745  12
   1  -8  29 2803.64 365.676   7
   1  -8  29 3410.59 406.879   2
   1  -8  29 3039.99 366.913  12
  -1  -8 -29 2372.16 291.853   6
   1   8  29 2808.49 298.186   8
  -1   8 -29 2971.38 341.022   1
  -1  -8 -29 2836.39 367.048   1
  -1   8 -30 565.189 216.476   1
   1   8  30 348.283 170.421   8
  -1  -8 -30 404.108 179.657   6
   1  -8  30 160.847 198.653  12
   1  -8  30 317.848 220.524   7
  -1  -8 -30 215.944 214.445   1
  -1  -8 -31 7692.38 587.903   1
   1   8  31 7375.89 491.436   8
  -1  -8 -31 7366.84 505.884   6
  -1   8 -31 7975.21 562.620   1
   1  -8  31 7561.73 580.016  12
   1  -8  31 8108.23 583.578   7
   1  -8  32 2495.30 353.235  12
  -1  -8 -32 3079.47 345.962   6
  -1   8 -32 2655.87 357.824   1
   1   8  32 3084.59 341.701   8
   1  -8  32 3259.92 405.691   7
  -1  -8 -32 2865.24 365.332   1
   1  -8  33 1753.81 324.389   7
  -1   8 -33 1996.68 312.865   1
  -1  -8 -33 1377.75 282.243   1
   1   8  33 1820.24 276.533   8
  -1  -8 -33 1495.53 272.971   6
   1  -8  33 2033.30 345.680  12
  -1  -8 -34 587.813 212.512   6
  -1   8 -34 493.224 232.767   1
   1  -8  34-18.6520 230.486  12
  -1  -8 -34 135.159 200.575   1
   1  -8  34 198.321 200.382   7
  -1   8 -35 6674.89 556.263   1
  -1  -8 -35 6314.66 495.799   6
   1  -8  35 7332.07 602.857  12
  -1  -8 -35 6604.40 576.645   1
   1  -8  35 5511.49 525.759   7
   1  -8  36 507.048 239.380  12
  -1   8 -36 326.654 222.284   1
   1  -8  36 286.353 234.423   7
   1  -9 -37 143.723 210.215   6
   1  -9 -36 2116.71 337.379   6
  -1   9  36 2705.25 413.607  12
   1  -9 -36 2747.63 383.399   1
   1  -9 -35 282.926 213.470   6
   1  -9 -35 543.998 217.276   1
  -1   9  35 96.3888 215.517  12
  -1  -9  35-179.252 237.650   7
  -1   9  34-173.809 237.577  12
   1  -9 -34 196.350 216.930   6
   1  -9 -34-304.369 216.476   1
  -1  -9  34 263.948 249.653   7
   1  -9 -33 371.504 196.160   6
  -1   9  33 256.824 215.041  12
  -1  -9  33 29.4104 204.805   7
   1  -9 -33-166.826 217.266   1
  -1  -9  32 598.268 270.687   7
  -1   9  32 553.100 253.346  12
   1  -9 -32 407.636 211.204   6
   1  -9 -32 209.089 182.385   1
   1  -9 -31 1576.32 286.065   1
   1  -9 -31 1540.62 287.260   6
  -1   9  31 1611.97 241.373   5
  -1  -9  31 1325.93 297.807   7
  -1   9  31 1923.69 349.379  12
  -1   9  30 979.705 216.344   5
   1  -9 -30 952.262 248.743   6
  -1   9  30 646.131 237.362  12
  -1  -9  30 1037.65 276.615   7
   1  -9 -30 752.792 231.391   1
  -1   9  29 10999.3 683.441  12
  -1  -9  29 11684.6 706.635   7
   1  -9 -29 10120.3 613.124   6
  -1   9  29 10852.2 564.303   5
   1  -9 -29 10856.6 659.129   1
   1  -9 -28 2342.06 337.014   1
   1  -9 -28 2314.61 326.006   6
  -1  -9  28 2126.13 353.945   7
  -1   9  28 2817.52 316.323   5
   1  -9 -27 37923.4 1272.39   1
  -1  -9  27 39535.2 1319.08   7
   1  -9 -27 35188.2 1201.12   6
  -1   9  27 38126.9 1136.91   5
  -1   9  26 736.631 217.410   5
   1  -9 -26 860.198 262.283   6
  -1   9  26 844.308 175.238   8
   1  -9 -26 95.6662 209.400   1
  -1  -9  26 535.373 293.947   7
  -1   9  25 130.261 100.657   8
   1  -9 -25-148.746 185.742   1
  -1  -9  25-30.8159 191.703   7
  -1   9  25-103.548 130.974   5
   1  -9 -25 172.070 156.059   6
  -1  -9  24 3434.39 360.777   7
   1  -9 -24 2816.53 309.596   6
  -1   9  24 3525.47 258.348   8
  -1   9  24 3007.28 280.547   5
   1  -9 -24 4501.73 404.233   1
   1  -9 -23 3162.27 317.903   6
  -1   9  23 3504.78 301.789   5
  -1   9  23 3971.55 260.936   8
   1   9 -23 3623.35 366.978  10
  -1  -9  23 3543.10 365.255   7
  -1   9  22 5558.40 357.660   5
   1  -9 -22 5464.13 412.523   6
  -1   9  22 5844.69 311.065   8
   1   9 -22 5147.04 412.028  10
  -1  -9  22 5145.40 421.182   7
   1   9 -21 28431.8 1001.41  10
  -1   9  21 28438.2 873.660   5
  -1   9  21 28648.7 780.179   8
   1  -9 -21 29287.3 964.779   6
  -1  -9  21 27478.9 981.247   7
  -1   9  20 6272.41 311.021   8
   1  -9 -20 6320.48 414.577   6
  -1   9  20 6317.88 373.636   5
  -1  -9  20 6059.78 434.502   7
   1   9 -20 5491.96 417.767  10
  -1  -9  19 432.417 175.426   7
   1  -9 -19 658.467 175.583   6
  -1   9  19 670.195 110.801   8
   1   9 -19 315.750 164.379  10
  -1   9  19 320.366 124.348   5
   1   9 -18 384.993 167.971  10
  -1   9  18 554.062 103.063   8
  -1   9  18 608.639 141.090   5
  -1  -9  18 651.810 193.982   7
   1  -9 -18 453.474 162.942   6
   1   9 -17 12112.9 565.967  10
  -1   9  17 12596.8 422.511   8
  -1   9  17 12275.0 495.409   5
  -1  -9  17 12414.6 571.902   7
   1  -9 -17 11994.0 548.518   6
   1   9 -16 4581.86 340.273  10
  -1   9  16 4185.88 284.319   5
  -1   9  16 4803.72 239.562   8
   1  -9 -16 4807.39 341.995   6
  -1  -9  16 4494.55 340.288   7
  -1  -9  15 110.936 142.444   7
   1   9 -15 86.2814 130.470  10
  -1   9  15-138.487 103.157   5
   1  -9 -15 295.106 133.526   6
  -1   9  15 100.311 62.7697   8
  -1   9  14 2444.44 164.701   8
  -1  -9  14 2424.45 252.613   7
   1   9 -14 2319.85 238.575  10
   1  -9 -14 2054.53 223.146   6
  -1  -9  13 5229.79 335.833   7
  -1   9  13 5003.91 230.802   8
   1  -9 -13 5202.93 329.489   6
   1   9 -13 4842.74 326.324  10
   1   9 -12 31130.1 859.147  10
   1  -9 -12 30302.8 850.838   6
  -1   9  12 30539.4 680.819   8
  -1  -9  12 31758.2 866.497   7
  -1   9  11 7016.05 265.608   8
  -1  -9  11 7240.55 370.588   7
   1  -9 -11 6855.65 360.416   6
   1   9 -11 6466.57 354.173  10
   1  -9 -11 6138.09 184.118   9
  -1  -9  10 8345.64 402.849   7
  -1   9  10 9333.52 313.994   8
   1  -9 -10 9457.18 250.783   9
   1  -9 -10 9182.72 420.092   6
   1   9 -10 9586.99 419.780  10
   1  -9  -9 1192.41 167.106   6
   1   9  -9 1096.42 166.086  10
  -1   9   9 1455.86 115.038   8
  -1  -9   9 1597.23 183.895   7
   1   9  -8 23516.1 732.227   8
   1   9  -8 23773.1 703.656  10
  -1   9   8 23877.7 579.794   8
   1  -9  -8 22848.1 701.191   6
  -1  -9   8 24946.4 715.224   7
  -1   9   7 47277.1 1113.99  10
  -1   9   7 48752.0 995.354   8
  -1  -9   7 48660.4 1124.89   7
   1  -9  -7 47729.0 1133.62   6
   1   9  -7 47675.4 1163.75   8
   1  -9  -7 48281.2 1020.26   4
   1   9  -7 46798.3 1121.28  10
   1   9  -6 5554.60 311.483   8
   1   9  -6 5668.27 295.226  10
  -1   9   6 5586.11 234.479   8
  -1   9   6 5438.26 233.814  11
   1  -9  -6 5593.08 240.697   4
   1  -9  -6 5764.47 305.371   6
  -1  -9   6 5681.63 297.842   7
  -1   9   6 5605.29 290.759  10
   1   9  -5 11803.9 457.319   8
  -1   9   5 11897.8 368.887   8
  -1   9   5 11668.2 434.729  10
   1   9  -5 12180.4 436.711  10
  -1   9   5 11220.8 355.686  11
   1  -9  -5 10977.8 434.234   6
   1  -9  -5 12142.1 374.132   4
  -1  -9   5 11653.9 430.628   7
   1   9  -4 22065.7 656.971   8
   1   9  -4 22040.7 634.265  10
  -1   9   4 21270.8 628.598  10
   1  -9  -4 21656.4 642.280   6
  -1   9   4 21832.1 541.423  11
   1  -9  -4 22625.1 562.753   4
  -1   9   4 22293.6 563.272   8
  -1  -9   4 21226.1 622.259   7
  -1  -9   4 21362.4 642.425   6
  -1   9   3 26983.9 632.693  11
   1   9  -3 25928.3 710.118  10
  -1   9   3 27082.1 660.146   8
   1  -9  -3 27353.1 732.003   6
  -1  -9   3 27151.2 737.618   6
   1  -9  -3 27165.6 649.832   4
   1   9  -3 28011.6 754.218   8
  -1  -9   3 26742.7 709.585   7
  -1   9   3 27005.2 720.439  10
  -1   9   2 1801.67 144.386   8
   1   9  -2 1641.97 172.347   8
   1  -9  -2 1688.46 164.815   6
  -1  -9   2 1763.45 165.999   7
  -1   9   2 1715.12 125.478  11
  -1  -9   2 1600.02 169.375   6
   1   9  -2 1851.26 166.221  10
  -1   9   2 2065.84 176.755  10
   1  -9  -2 1864.10 141.283   4
  -1  -9   2 1368.07 77.6901  11
  -1  -9   1 15945.9 523.120   6
   1  -9  -1 16791.5 523.682   6
  -1   9   1 15459.7 510.572  10
  -1   9   1 16215.4 484.581   8
   1   9  -1 16098.1 527.136   8
  -1   9   1 16765.7 445.023  11
   1   9  -1 15769.9 506.801  10
  -1  -9   1 16683.0 339.513  11
  -1   9   0 1901.48 156.487   8
  -1  -9   0 1901.27 176.877   6
   1   9   0 2125.40 180.725   8
   1  -9   0 1865.74 165.364   6
   1   9   0 2079.92 169.753  10
  -1   9   0 1927.15 168.546  10
  -1  -9  -1 7761.84 334.971   6
   1   9   1 7292.34 319.887  10
   1   9   1 7016.56 317.659   8
   1  -9   1 6868.97 315.789   6
  -1   9  -1 7023.86 320.109  10
  -1   9  -2 5465.65 180.984  12
   1   9   2 5148.23 263.970  10
  -1  -9  -2 5099.66 274.410   6
   1   9   2 5060.40 265.819   8
  -1   9  -2 5184.34 274.187  10
   1  -9   2 5692.92 283.926   6
  -1  -9  -2 5302.01 160.845   4
  -1   9  -3 77.4862 89.6033  10
   1  -9   3 73.3747 91.0497   6
   1   9   3 27.3108 82.5892  10
  -1   9  -3 91.0645 42.9568  12
  -1  -9  -3 59.1799 85.2898   6
  -1  -9  -3 55.4886 23.9362   4
   1   9   3 112.997 87.3380   8
   1   9   4 7582.87 333.840  10
  -1   9  -4 7692.67 344.682  10
   1  -9   4 7535.19 333.842   6
   1   9   4 8159.78 338.046   8
   1   9   4 7670.61 176.528  11
  -1   9  -4 8127.86 258.287  12
  -1  -9  -4 8126.55 351.783   6
  -1  -9  -4 7678.79 190.240   4
   1   9   5 7405.81 323.815   8
  -1  -9  -5 6792.74 325.533   6
   1   9   5 6908.68 323.135  10
   1  -9   5 6988.15 333.437   7
   1   9   5 7206.14 182.975  11
   1  -9   5 7218.17 324.652   6
  -1   9  -5 6875.78 327.930  10
  -1  -9  -6 4095.61 254.672   6
  -1   9  -6 4324.05 261.778  10
   1   9   6 4130.50 239.146   8
  -1  -9  -6 4539.48 230.540   9
   1   9   6 4141.34 249.162  10
   1  -9   6 4671.30 270.167   7
   1  -9   6 4054.27 242.122   6
   1  -9   7 72.1081 98.9126   7
  -1  -9  -7 188.813 99.8300   6
  -1   9  -7 56.7627 102.080  10
   1   9   7 202.417 88.8411   8
  -1  -9  -7 174.177 82.2058   9
  -1   9  -8 12367.3 477.322  10
  -1  -9  -8 12822.9 405.657   9
   1   9   8 12069.6 434.322   8
   1  -9   8 11930.1 466.938   7
  -1  -9  -8 12400.4 462.414   6
   1  -9   9 31179.6 859.708   7
  -1   9  -9 29926.0 865.100  10
  -1  -9  -9 32146.0 849.991   6
  -1  -9  -9 32592.4 760.888   9
   1   9   9 30285.1 803.775   8
   1   9   9 32452.3 628.891   4
  -1  -9 -10 28.2660 58.4556   9
   1   9  10 69.0936 85.8929   8
  -1   9 -10-78.9184 130.075  10
   1   9  10 66.7506 31.7663   4
  -1  -9 -10 118.923 97.4250   6
   1  -9  10 95.9008 114.395   7
   1   9  11 785.805 70.8002   4
   1  -9  11 584.081 145.538   7
   1  -9  11 705.624 177.485   2
  -1  -9 -11 676.287 140.412   6
  -1   9 -11 392.602 125.822  10
  -1  -9 -11 707.673 98.3978   9
   1  -9  11 794.620 119.322  12
   1   9  11 525.854 110.389   8
   1   9  12-14.2161 36.2866   4
  -1   9 -12-103.551 138.308  10
  -1  -9 -12 19.0429 85.7607   6
   1  -9  12 88.3492 90.1113  12
  -1  -9 -12-0.05901 65.6645   9
   1  -9  12 74.1713 146.907   2
   1   9  12-66.5833 98.3417   8
   1  -9  12-131.266 115.871   7
  -1   9 -13 17682.1 661.097  10
   1  -9  13 19217.3 655.833   7
  -1  -9 -13 18760.1 630.762   6
   1  -9  13 18420.7 589.814  12
   1  -9  13 18128.8 709.206   2
   1   9  13 16903.6 579.022   8
   1   9  14 1171.07 156.376   8
   1  -9  14 1964.22 283.822   2
  -1   9 -14 1371.59 207.573  10
   1  -9  14 1450.81 198.176   7
  -1  -9 -14 1147.81 187.212   6
   1  -9  14 1483.40 169.300  12
  -1   9 -15 57896.6 1415.31  10
   1   9  15 57238.5 1310.36   8
   1  -9  15 56085.1 1473.60   2
   1  -9  15 53250.0 1306.18  12
   1  -9  15 57826.1 1403.46   7
  -1  -9 -15 54784.1 1340.32   6
   1  -9  16 16941.1 720.502   2
   1  -9  16 16387.0 646.894   7
  -1  -9 -16 15637.0 601.888   6
  -1   9 -16 16702.6 662.592  10
   1  -9  16 17191.0 612.882  12
   1   9  16 16864.9 587.064   8
   1  -9  17 5350.49 342.182  12
   1  -9  17 5546.54 415.506   2
   1  -9  17 4866.61 345.918   7
  -1  -9 -17 4640.51 321.487   6
  -1   9 -17 4990.23 358.643  10
   1   9  17 4483.73 295.207   8
   1   9  18 2364.83 222.754   8
   1  -9  18 2245.29 257.015   7
   1  -9  18 3148.92 345.070   2
  -1  -9 -18 2656.31 248.907   6
  -1   9 -18 1605.26 242.882  10
   1  -9  18 2601.53 258.807  12
   1  -9  19 51954.0 1384.00   7
  -1   9 -19 50674.9 1404.98  10
   1  -9  19 50951.6 1334.51  12
  -1  -9 -19 49478.0 1304.94   6
   1   9  19 51970.8 1279.39   8
   1  -9  19 51965.7 1460.51   2
   1  -9  20 6813.97 455.491   7
   1  -9  20 6799.17 499.142   2
  -1  -9 -20 8606.53 522.917   1
  -1  -9 -20 7491.86 431.049   6
   1   9  20 6512.74 390.531   8
  -1   9 -20 6850.10 467.209  10
   1  -9  20 6507.96 419.298  12
   1  -9  21 25058.7 863.572  12
   1   9  21 24542.3 702.884   5
  -1  -9 -21 24340.3 917.156   1
   1   9  21 24089.5 793.120   8
   1  -9  21 24909.2 946.916   2
  -1  -9 -21 22674.6 814.535   6
  -1   9 -21 23410.5 906.383  10
   1  -9  21 22599.7 863.926   7
   1  -9  22 697.954 240.557   2
  -1  -9 -22 189.490 150.934   1
   1   9  22 475.127 156.402   8
   1  -9  22 177.596 170.369   7
  -1   9 -22 23.5154 189.934  10
   1   9  22 376.377 109.328   5
   1  -9  22 670.263 184.291  12
  -1  -9 -22 194.342 147.065   6
   1  -9  23 339.546 184.865   7
  -1  -9 -23 156.989 164.177   1
   1  -9  23 514.711 223.665   2
   1   9  23 154.945 95.3695   5
  -1  -9 -23 202.693 132.833   6
   1  -9  23 542.138 179.686  12
   1   9  23 240.503 143.878   8
  -1   9 -23 82.9554 170.867  10
   1   9  24 4686.90 351.978   8
   1  -9  24 4938.01 414.555   7
  -1  -9 -24 5068.57 370.848   6
   1   9  24 4629.86 291.865   5
   1  -9  24 5288.98 444.313   2
  -1  -9 -24 5344.33 436.749   1
   1  -9  24 4648.98 391.383  12
  -1  -9 -25 128.909 163.292   1
   1  -9  25 100.094 165.794   2
  -1  -9 -25 224.077 153.077   6
   1  -9  25 172.806 154.690  12
   1   9  25 109.116 132.489   8
   1  -9  25 133.378 164.850   7
   1  -9  26 292.948 229.191   2
   1  -9  26-53.0665 148.708  12
  -1  -9 -26 207.585 150.395   6
   1  -9  26 68.3741 172.544   7
   1   9  26-45.4254 139.456   8
  -1  -9 -26 30.9362 157.135   1
  -1  -9 -27 912.517 221.155   1
   1  -9  27 932.285 249.546   7
   1  -9  27 1107.83 245.267  12
   1   9  27 1315.41 220.955   8
  -1  -9 -27 1024.52 203.695   6
  -1  -9 -28 152.639 172.332   6
  -1  -9 -28 42.3090 188.688   1
   1  -9  28-197.658 189.983  12
   1  -9  28 43.0159 204.196   7
   1   9  28 180.635 151.614   8
   1  -9  29 5045.85 460.364   7
  -1  -9 -29 4620.46 442.122   1
  -1  -9 -29 4691.67 406.885   6
   1   9  29 4563.36 380.710   8
   1  -9  29 4658.14 437.013  12
   1   9  30 1895.69 279.266   8
   1  -9  30 2257.17 346.279   7
   1  -9  30 1691.79 306.805  12
  -1  -9 -30 1710.78 272.600   6
  -1  -9 -30 1262.48 270.724   1
  -1  -9 -31 1042.08 235.690   6
   1   9  31 1060.41 237.495   8
   1  -9  31 929.803 263.813   7
  -1  -9 -31 1261.39 268.851   1
   1  -9  31 1213.72 293.190  12
   1  -9  32 6865.57 568.400   7
  -1  -9 -32 6806.17 575.071   1
   1   9  32 6702.66 479.416   8
   1  -9  32 5713.33 517.802  12
  -1  -9 -32 7202.42 520.022   6
   1  -9  33 5818.46 529.657   7
   1  -9  33 7609.89 593.376  12
  -1  -9 -33 5663.55 467.030   6
  -1  -9 -33 6275.49 557.228   1
  -1  -9 -34-351.609 233.887   1
  -1  -9 -34 24.8081 168.367   6
   1  -9  34 90.9675 197.258  12
   1  -9  34 211.899 232.915   7
  -1  -9 -35 620.460 206.260   6
   1  -9  35 591.220 257.946   7
   1  -9  35 734.017 275.886  12
   1 -10 -36 1486.27 304.764   6
  -1  10  36 1098.79 327.953  12
   1 -10 -35 74.5416 198.830   6
  -1  10  35 29.7471 238.080  12
   1 -10 -35 6.81736 176.167   1
   1 -10 -34 506.962 184.512   1
   1 -10 -34 344.065 197.268   6
  -1 -10  34 960.583 315.716   7
   1 -10 -33 6686.74 576.597   1
  -1  10  33 5902.11 573.220  12
   1 -10 -33 5934.57 516.272   6
  -1 -10  33 6203.27 558.927   7
  -1  10  32 27497.8 1190.88  12
   1 -10 -32 25047.1 1067.80   6
   1 -10 -32 27865.3 1153.62   1
  -1 -10  32 26036.4 1149.12   7
  -1  10  31 2964.46 415.055  12
  -1 -10  31 3867.10 457.883   7
   1 -10 -31 2906.68 372.908   6
   1 -10 -31 2850.98 387.307   1
  -1  10  30-41.8615 197.946  12
  -1 -10  30 261.809 199.654   7
   1 -10 -30 87.0022 171.776   6
   1 -10 -30 83.8642 183.601   1
  -1  10  30 231.101 154.165   5
   1 -10 -29 4582.46 435.946   1
  -1  10  29 4769.00 378.935   5
  -1 -10  29 4628.92 473.578   7
   1 -10 -29 4300.67 408.848   6
   1 -10 -28 3041.96 364.959   1
   1 -10 -28 3367.48 359.615   6
  -1  10  28 3528.39 334.881   5
  -1 -10  28 3364.60 407.484   7
   1 -10 -27 249.855 145.156   1
  -1 -10  27 538.957 231.827   7
   1 -10 -27 474.962 197.604   6
  -1  10  27 749.397 194.342   5
   1 -10 -26 843.849 223.807   1
  -1 -10  26 720.985 232.390   7
  -1  10  26 725.836 181.997   5
   1 -10 -26 739.687 204.562   6
  -1 -10  25 38.3066 182.217   7
   1 -10 -25 108.307 141.109   6
  -1  10  25 310.362 153.460   5
  -1 -10  24 3300.67 360.328   7
   1  10 -24 3688.68 370.327  10
  -1  10  24 3955.94 270.978   8
  -1  10  24 4025.17 316.872   5
   1 -10 -24 3703.94 358.708   6
  -1  10  23-35.0557 114.859   5
  -1 -10  23 154.537 192.025   7
   1  10 -23-381.945 222.966  10
   1 -10 -23 71.6939 156.701   6
  -1  10  23 23.2086 84.5807   8
  -1  10  22 2911.86 228.391   8
   1  10 -22 3369.03 341.778  10
  -1  10  22 3120.39 270.699   5
  -1 -10  22 2712.33 313.757   7
   1 -10 -22 2436.82 281.882   6
   1 -10 -21 111.968 142.645   6
  -1  10  21 27.6095 110.874   5
   1  10 -21 92.4038 174.530  10
  -1 -10  21 85.7103 170.991   7
  -1  10  21 160.197 87.6433   8
  -1 -10  20 9647.74 547.936   7
   1 -10 -20 9538.91 519.043   6
  -1  10  20 9824.13 471.378   5
   1  10 -20 10160.2 553.786  10
  -1  10  20 9980.67 399.570   8
   1 -10 -19 1465.51 227.781   6
   1  10 -19 1163.27 219.038  10
  -1  10  19 1458.38 150.695   8
  -1 -10  19 1290.22 234.591   7
  -1  10  19 1420.05 187.949   5
  -1 -10  18 1669.50 248.919   7
   1 -10 -18 1670.49 234.919   6
  -1  10  18 1904.99 214.298   5
   1  10 -18 1203.48 211.607  10
  -1  10  18 1800.15 161.868   8
   1 -10 -17 4867.62 352.575   6
  -1  10  17 4563.71 245.069   8
   1  10 -17 4557.85 349.731  10
  -1 -10  17 4831.95 370.386   7
  -1 -10  16 29441.0 935.570   7
   1 -10 -16 28871.9 918.236   6
  -1  10  16 28968.7 732.157   8
   1  10 -16 28396.6 928.748  10
   1 -10 -15 1207.28 209.814   6
  -1 -10  15 894.419 182.321   7
  -1  10  15 750.023 103.619   8
   1  10 -15 762.300 183.112  10
   1 -10 -14 191.979 136.175   6
  -1 -10  14 251.708 138.122   7
   1  10 -14 201.474 132.623  10
  -1  10  14 193.594 63.6171   8
   1  10 -13-27.5353 134.987  10
   1 -10 -13 192.682 121.696   6
  -1  10  13-12.3415 65.6747   8
  -1 -10  13-65.8738 138.733   7
   1  10 -12-74.4098 121.950  10
  -1  10  12 130.287 61.6752   8
  -1 -10  12-38.8885 125.031   7
   1 -10 -12 73.6975 113.686   6
   1 -10 -12 74.6186 31.9484   9
  -1  10  11 429.525 81.6382   8
   1 -10 -11 530.362 141.208   6
  -1 -10  11 598.739 154.880   7
   1 -10 -11 515.479 57.1855   9
   1  10 -11 425.960 126.800  10
   1  10 -10 2184.74 214.946  10
   1 -10 -10 2509.07 233.145   6
  -1  10  10 2499.14 159.951   8
  -1 -10  10 2206.21 214.860   7
  -1 -10   9 1109.68 163.007   7
   1 -10  -9 766.979 157.549   6
   1  10  -9 857.401 149.401  10
  -1  10   9 1231.35 117.001   8
   1  10  -8 4198.80 288.140   8
  -1 -10   8 3884.69 265.535   7
  -1  10   8 3505.03 251.226  10
   1 -10  -8 3740.97 274.620   6
   1  10  -8 3795.36 266.659  10
  -1  10   8 4222.17 208.321   8
  -1 -10   7 15593.2 542.188   7
  -1  10   7 15105.3 442.515   8
   1 -10  -7 13619.3 439.181   4
   1  10  -7 14205.9 550.805   8
  -1  10   7 14976.1 440.630  11
   1 -10  -7 15525.0 548.642   6
   1  10  -7 14684.2 534.053  10
  -1  10   7 14195.4 522.317  10
   1 -10  -6 14532.1 536.956   6
  -1  10   6 15513.9 445.664  11
  -1  10   6 15337.8 454.909   8
   1  10  -6 15562.0 542.159  10
  -1  10   6 15278.1 535.747  10
   1  10  -6 16225.5 576.334   8
   1 -10  -6 15293.5 452.091   4
  -1 -10   6 15318.2 535.390   7
   1  10  -5-92.1413 110.497  10
   1  10  -5 167.359 115.042   8
  -1  10   5 16.4139 56.3770   8
  -1  10   5 115.831 64.1648  11
   1 -10  -5 65.5927 106.377   6
  -1 -10   5 13.4791 97.2909   7
  -1  10   5-73.4420 113.061  10
   1 -10  -5 164.031 65.6018   4
   1 -10  -4 35370.2 817.691   4
   1 -10  -4 36592.8 932.596   6
  -1  10   4 35746.1 799.682  11
  -1  10   4 35980.9 916.737  10
  -1 -10   4 36133.2 904.993   7
  -1  10   4 36735.5 838.682   8
   1  10  -4 35677.1 939.225   8
   1  10  -4 35129.2 908.941  10
  -1 -10   4 35751.8 928.316   6
   1 -10  -3 5954.87 314.679   6
  -1 -10   3 5285.73 303.361   6
  -1 -10   3 6201.03 307.489   7
   1  10  -3 5493.23 298.563  10
   1  10  -3 5644.78 311.810   8
   1 -10  -3 5357.59 245.060   4
  -1  10   3 5594.44 259.405   8
  -1  10   3 5435.20 232.529  11
  -1  10   3 5436.21 305.641  10
  -1 -10   2 37323.0 949.259   6
  -1  10   2 37148.8 823.547  11
  -1  10   2 38084.0 885.033   8
  -1 -10   2 38532.3 720.517  11
   1 -10  -2 36981.6 940.168   6
   1  10  -2 37307.1 955.922   8
   1 -10  -2 37335.8 851.157   4
  -1  10   2 38068.7 942.063  10
   1  10  -2 36521.4 927.292  10
   1 -10  -1 30882.3 824.525   6
  -1 -10   1 30746.0 834.927   6
  -1  10   1 31061.2 782.768   8
  -1 -10   1 31545.9 596.179  11
  -1  10   1 31624.9 723.950  11
  -1  10   1 30815.7 822.007  10
   1  10  -1 33348.1 832.345  10
   1  10  -1 30961.4 832.147   8
   1  10   0 17225.8 552.080  10
   1  10   0 17755.9 578.810   8
  -1  10   0 17451.1 538.891   8
  -1 -10   0 18188.8 580.688   6
   1 -10   0 17769.0 566.983   6
  -1  10   0 18731.4 578.626  10
   1 -10   1 232.877 94.9023   6
   1  10   1 34.4112 93.8542   8
  -1 -10  -1 110.584 92.3546   6
  -1  10  -1 83.4612 100.168  10
   1  10   1 59.6674 89.7807  10
   1 -10   2 17766.9 570.264   6
  -1  10  -2 18474.1 426.720  12
   1  10   2 16991.6 561.249   8
   1  10   2 17589.2 566.008  10
  -1  10  -2 18564.7 589.175  10
  -1 -10  -2 18184.9 586.503   6
  -1 -10  -2 18428.0 403.279   4
   1  10   3 11535.7 444.424   8
  -1 -10  -3 12591.5 294.442   4
   1 -10   3 12814.6 465.781   6
   1  10   3 11936.6 449.479  10
  -1  10  -3 12641.0 471.401  10
  -1 -10  -3 12155.7 464.759   6
  -1  10  -3 13240.8 345.189  12
  -1  10  -4 128240. 2472.75  10
   1 -10   4 124744. 2443.15   6
   1  10   4 131113. 2445.23   8
   1  10   4 127227. 2448.67  10
  -1  10  -4 126563. 2275.09  12
   1  10   4 126032. 2136.61  11
  -1 -10  -4 128431. 2170.66   4
  -1 -10  -4 131547. 2482.32   6
   1  10   5 5553.83 151.510  11
   1 -10   5 5122.79 287.396   6
   1  10   5 5069.04 289.982  10
   1  10   5 5096.78 279.466   8
  -1  10  -5 5448.39 310.983  10
  -1 -10  -5 5141.03 299.153   6
  -1  10  -5 5130.67 218.417  12
   1 -10   5 5063.85 299.516   7
   1  10   6 6929.07 327.170   8
   1  10   6 6110.36 324.359  10
   1 -10   6 6687.09 346.756   7
  -1  10  -6 6919.35 352.572  10
  -1 -10  -6 6744.33 340.432   6
   1 -10   6 6738.68 330.289   6
   1  10   6 7319.08 196.294  11
  -1  10  -7 16167.0 569.645  10
   1  10   7 14797.1 537.505  10
  -1 -10  -7 16549.6 498.971   9
  -1 -10  -7 15636.6 550.983   6
   1  10   7 16739.4 541.991   8
   1 -10   7 16441.8 567.528   7
  -1 -10  -8 19631.1 652.645   6
   1 -10   8 20565.2 669.720   7
  -1 -10  -8 24093.9 612.145   9
  -1  10  -8 20188.5 672.852  10
   1  10   8 20323.1 622.563   8
  -1 -10  -9 17642.5 514.898   9
  -1 -10  -9 16615.9 587.711   6
  -1  10  -9 18381.9 624.450  10
   1  10   9 17564.0 567.799   8
   1 -10   9 17685.4 615.657   7
  -1 -10 -10 2387.32 169.366   9
  -1 -10 -10 2184.58 207.922   6
   1  10  10 2153.77 190.691   8
  -1  10 -10 2023.35 208.269  10
   1  10  10 2064.56 106.685   4
   1 -10  10 1861.20 207.411   7
  -1  10 -11 3462.79 272.095  10
   1  10  11 3601.46 150.092   4
   1  10  11 3582.24 242.506   8
  -1 -10 -11 3590.74 205.119   9
   1 -10  11 3599.32 276.585   7
  -1 -10 -11 3420.53 261.485   6
  -1 -10 -12 6393.44 356.605   6
   1  10  12 6760.44 224.914   4
   1  10  12 6391.63 328.169   8
  -1 -10 -12 6126.27 271.763   9
  -1  10 -12 6723.98 381.071  10
   1 -10  12 6217.77 366.258   7
  -1  10 -13 844.058 158.348  10
  -1 -10 -13 1173.80 121.339   9
   1 -10  13 783.193 165.658   7
   1  10  13 943.006 91.5000   4
  -1 -10 -13 1317.50 176.506   6
   1  10  13 984.688 144.457   8
  -1  10 -14 4366.76 332.523  10
   1 -10  14 3950.05 308.565   7
   1  10  14 4063.72 273.497   8
  -1 -10 -14 4746.55 311.941   6
   1 -10  15 3820.62 317.824   7
   1  10  15 3183.53 244.333   8
  -1 -10 -15 3553.24 282.009   6
  -1  10 -15 3566.99 311.602  10
   1 -10  15 3819.33 277.901  12
   1  10  16 8423.37 405.728   8
   1 -10  16 8169.56 413.992  12
  -1 -10 -16 9563.39 461.108   6
   1 -10  16 8852.12 469.386   7
  -1  10 -16 8530.51 473.609  10
   1 -10  17 6602.44 420.519   7
  -1  10 -17 7655.47 453.618  10
   1 -10  17 7206.74 391.957  12
   1  10  17 6694.18 362.579   8
   1 -10  17 6434.54 459.578   2
  -1 -10 -17 6396.99 387.308   6
   1 -10  18 1760.61 249.910   7
   1 -10  18 2435.47 313.348   2
  -1  10 -18 1988.86 249.600  10
   1 -10  18 2578.91 245.213  12
  -1 -10 -18 2036.11 235.938   6
   1  10  18 1902.83 199.314   8
   1  10  19 1035.91 171.943   8
   1 -10  19 1782.32 295.150   2
   1 -10  19 1193.65 222.122   7
   1 -10  19 1283.46 204.815  12
  -1 -10 -19 1382.19 221.066   6
  -1  10 -19 967.088 217.774  10
  -1 -10 -20 22009.3 798.131   6
  -1  10 -20 22782.6 877.547  10
   1 -10  20 22333.4 802.806  12
   1  10  20 22669.5 760.277   8
   1 -10  20 23110.8 857.918   7
  -1 -10 -21 433.254 170.927   6
  -1  10 -21 526.198 195.711  10
   1  10  21 409.158 143.274   8
   1 -10  21 134.133 188.825   7
   1 -10  21 777.168 178.201  12
   1 -10  22-310.668 207.371   7
  -1 -10 -22 100.351 161.206   1
   1  10  22 207.741 131.920   8
  -1 -10 -22 158.092 130.667   6
   1 -10  22 221.433 153.014  12
  -1  10 -22-55.0185 172.831  10
  -1  10 -23-37.7969 184.316  10
   1 -10  23 324.489 201.765   7
  -1 -10 -23 289.160 142.065   6
   1 -10  23 369.291 168.950  12
   1  10  23 118.013 124.132   8
  -1 -10 -23 68.4583 170.276   1
  -1  10 -24 3247.98 346.260  10
  -1 -10 -24 2901.12 299.904   6
  -1 -10 -24 3630.26 375.068   1
   1 -10  24 4235.89 372.349  12
   1 -10  24 3601.71 366.740   7
   1  10  24 2875.93 281.311   8
   1 -10  25 141.871 185.911   7
   1  10  25 109.945 133.920   8
  -1 -10 -25 251.826 195.207   1
   1 -10  25 157.266 160.775  12
  -1 -10 -25 616.646 193.208   6
   1  10  26 4008.81 338.223   8
  -1 -10 -26 3787.03 393.922   1
   1 -10  26 4686.85 426.777   7
  -1 -10 -26 4106.15 357.371   6
   1 -10  26 4225.89 386.757  12
   1 -10  27 92.1392 183.808  12
   1 -10  27 257.097 214.353   7
   1  10  27 90.9323 141.513   8
  -1 -10 -27-12.6727 135.080   6
  -1 -10 -27 580.931 232.507   1
   1  10  28 9238.22 532.563   8
   1 -10  28 9821.75 613.419  12
  -1 -10 -28 10223.9 658.664   1
  -1 -10 -28 9404.77 563.193   6
   1 -10  28 11094.3 671.318   7
   1 -10  29 1877.36 329.237   7
   1 -10  29 1812.43 301.615  12
   1  10  29 2490.93 285.256   8
  -1 -10 -29 2218.43 309.933   6
  -1 -10 -29 2809.82 370.442   1
   1 -10  30 4152.74 427.801  12
  -1 -10 -30 4279.50 453.139   1
  -1 -10 -30 3382.13 366.515   6
   1  10  30 3900.29 368.108   8
   1 -10  30 4190.67 446.119   7
   1 -10  31 3536.29 398.716  12
   1 -10  31 3526.21 427.468   7
   1  10  31 3461.84 349.782   8
  -1 -10 -31 3424.12 369.626   6
  -1 -10 -31 3769.80 434.989   1
   1 -10  32 1134.33 290.435  12
   1 -10  32 763.844 260.999   7
  -1 -10 -32 1044.00 258.567   1
  -1 -10 -32 1046.66 248.620   6
   1 -10  33 138.830 210.705   7
  -1 -10 -33-60.5606 188.400   1
   1 -10  33 236.474 221.305  12
  -1 -10 -33-50.9689 160.873   6
   1 -10  34-250.085 245.747   7
  -1 -10 -34-76.4844 165.676   1
  -1 -10 -34 4.35077 164.442   6
   1 -10  34-157.749 218.580  12
  -1 -10 -35 693.062 219.597   6
   1 -10  35 1110.47 292.054   7
   1 -10  35 914.021 290.833  12
  -1  11  36 1037.07 296.303  12
   1 -11 -35 4194.42 453.613   6
  -1  11  35 2990.98 436.335  12
   1 -11 -34 1542.01 320.258   6
   1 -11 -34 1055.16 265.005   1
  -1  11  34 1515.07 370.340  12
  -1 -11  34 1450.73 356.925   7
   1 -11 -33 1365.69 309.537   6
  -1 -11  33 906.919 290.689   7
   1 -11 -33 986.440 265.764   1
  -1  11  33 946.918 283.826  12
   1 -11 -32 8828.34 649.052   1
  -1  11  32 9186.27 680.968  12
  -1 -11  32 9017.10 668.231   7
   1 -11 -32 8336.53 604.898   6
  -1 -11  31 2133.86 366.511   7
   1 -11 -31 1724.10 315.888   1
  -1  11  31 1207.89 292.502  12
   1 -11 -31 1198.20 280.050   6
  -1  11  30 6501.53 556.417  12
   1 -11 -30 5327.85 484.045   1
   1 -11 -30 5190.30 469.432   6
  -1 -11  30 6863.82 573.047   7
  -1 -11  29 3424.68 413.077   7
  -1  11  29 3352.17 331.771   5
   1 -11 -29 3404.42 410.032   1
   1 -11 -29 3268.75 380.638   6
   1 -11 -28 16645.0 805.006   6
  -1  11  28 17958.0 742.394   5
  -1 -11  28 17624.4 877.126   7
   1 -11 -28 16523.1 838.425   1
  -1 -11  27 2333.80 347.810   7
   1 -11 -27 1838.46 308.164   1
  -1  11  27 2477.29 282.696   5
   1 -11 -27 2402.76 331.502   6
   1 -11 -26 5102.34 429.858   6
   1 -11 -26 5781.59 487.703   1
  -1 -11  26 5291.20 475.443   7
  -1  11  26 4559.56 366.359   5
  -1  11  25 608.179 171.964   5
  -1 -11  25 662.282 233.206   7
   1 -11 -25 498.611 192.091   6
   1  11 -25 732.025 242.074  10
   1  11 -24 488.807 211.633  10
   1 -11 -24 600.735 204.203   6
  -1  11  24 590.740 154.629   5
  -1 -11  24 795.980 249.359   7
   1  11 -23 182.131 178.863  10
  -1 -11  23 140.819 203.614   7
   1 -11 -23 191.659 167.368   6
  -1  11  23 30.0879 90.8540   8
  -1  11  23 156.876 131.464   5
   1  11 -22 8290.89 537.056  10
  -1  11  22 8165.38 379.924   8
   1 -11 -22 7399.84 480.764   6
  -1 -11  22 8553.77 538.043   7
   1  11 -21 237.511 181.677  10
  -1 -11  21 443.574 191.596   7
   1 -11 -21 676.579 217.421   6
  -1  11  21 639.811 119.504   8
   1  11 -20 13687.6 675.948  10
  -1 -11  20 14020.9 670.935   7
  -1  11  20 14044.3 492.743   8
   1 -11 -20 12824.9 623.082   6
  -1 -11  19-34.0200 164.343   7
   1 -11 -19 175.800 171.735   6
  -1  11  19 137.389 77.3183   8
   1  11 -19 2.14947 158.181  10
  -1 -11  18 7989.25 487.332   7
   1 -11 -18 7159.01 447.096   6
  -1  11  18 8142.14 351.435   8
   1  11 -18 8099.32 481.770  10
  -1  11  17 3685.98 224.622   8
   1 -11 -17 3078.64 298.963   6
   1  11 -17 3259.99 320.595  10
  -1 -11  17 3362.05 321.997   7
  -1 -11  16 1129.82 214.021   7
  -1  11  16 1236.14 126.291   8
   1  11 -16 1339.44 215.305  10
   1 -11 -16 1414.98 215.317   6
  -1 -11  15 583.366 184.375   7
   1 -11 -15 758.783 181.623   6
   1  11 -15 679.956 180.288  10
  -1  11  15 788.842 107.406   8
   1 -11 -14 2656.80 256.352   6
  -1 -11  14 2926.82 276.337   7
   1  11 -14 2979.95 275.608  10
  -1  11  14 2897.20 190.739   8
   1 -11 -13 4051.38 307.217   6
  -1  11  13 3857.48 216.089   8
  -1 -11  13 4063.25 311.785   7
   1  11 -13 3957.08 318.538  10
   1 -11 -13 3496.88 136.312   9
  -1 -11  12 62.7328 136.956   7
   1  11 -12-41.6840 123.928  10
  -1  11  12 23.4252 62.2256   8
   1 -11 -12 59.3687 34.8849   9
   1 -11 -12 27.9289 118.017   6
   1  11 -11-70.1988 134.750  10
   1 -11 -11-77.2510 129.336   6
  -1 -11  11-57.1280 111.304   7
   1 -11 -11 38.1150 43.6858   9
  -1  11  11 20.8552 59.8621   8
   1  11 -10 1911.20 213.350  10
  -1  11  10 1633.93 140.310   8
  -1 -11  10 1613.19 200.342   7
   1 -11 -10 1457.62 188.452   6
   1  11  -9 813.895 167.483  10
  -1  11   9 581.975 144.341  10
  -1  11   9 686.744 102.890   8
  -1 -11   9 510.096 143.515   7
   1 -11  -9 678.664 157.174   6
   1 -11  -8 51301.7 1127.57   4
   1  11  -8 53303.2 1320.31   8
  -1  11   8 54532.1 1141.09   8
  -1  11   8 51100.5 1259.99  10
   1  11  -8 53408.3 1289.02  10
   1 -11  -8 52579.2 1280.61   6
  -1 -11   8 53150.0 1277.85   7
  -1  11   8 53668.4 1128.28  11
  -1  11   7-155.999 135.661  10
  -1 -11   7 279.643 129.563   7
   1  11  -7 52.0736 116.117   8
   1 -11  -7 203.061 132.177   6
  -1  11   7-13.1996 61.3462  11
  -1  11   7-34.0877 62.7688   8
   1  11  -7-132.423 113.478  10
   1 -11  -7 45.0825 62.6973   4
   1  11  -6 7638.36 391.370   8
   1 -11  -6 6591.98 284.876   4
  -1  11   6 6175.89 265.057  11
   1 -11  -6 6858.88 366.874   6
  -1  11   6 7154.57 299.805   8
  -1 -11   6 6479.22 351.067   7
  -1  11   6 6461.72 344.663  10
   1  11  -6 6674.40 357.671  10
  -1 -11   5 6161.12 338.119   7
   1  11  -5 6534.19 365.026   8
   1 -11  -5 7071.84 370.312   6
  -1  11   5 6802.37 297.513   8
   1  11  -5 6822.20 353.212  10
  -1  11   5 6588.83 270.847  11
  -1  11   5 6540.70 347.839  10
   1 -11  -5 6809.90 286.088   4
   1  11  -4 25679.3 772.388   8
   1 -11  -4 24650.4 637.902   4
  -1 -11   4 24819.2 725.572   7
  -1 -11   4 25917.7 760.650   6
  -1  11   4 24469.9 662.720   8
  -1  11   4 25748.8 743.685  10
   1  11  -4 24047.6 728.474  10
  -1  11   4 25446.6 620.884  11
   1 -11  -4 23969.4 741.648   6
   1 -11  -3 1534.59 147.472   4
  -1 -11   3 1804.63 195.967   7
  -1  11   3 1531.38 128.419  11
   1 -11  -3 1408.82 169.825   6
  -1 -11   3 1646.36 96.6132  11
   1  11  -3 1491.09 176.578  10
  -1  11   3 1618.88 153.291   8
   1  11  -3 1747.92 197.148   8
  -1 -11   3 1968.16 196.586   6
  -1  11   3 1621.74 182.460  10
   1 -11  -2 2393.53 215.796   6
   1 -11  -2 2144.89 161.628   4
  -1  11   2 2435.59 190.236   8
  -1  11   2 2292.30 206.218  10
   1  11  -2 2505.32 219.343  10
   1  11  -2 2394.81 211.699   8
  -1  11   2 2169.17 152.849  11
  -1 -11   2 2243.29 104.875  11
  -1 -11   2 2430.76 219.009   6
   1 -11  -1 44124.1 1007.85   4
  -1 -11   1 46656.1 840.532  11
  -1 -11   1 43653.4 1108.25   6
   1  11  -1 47047.3 1113.40  10
   1 -11  -1 43974.5 1099.97   6
   1  11  -1 45530.2 1118.70   8
  -1  11   1 46429.7 1111.28  10
  -1  11   1 45816.7 1066.81   8
  -1  11   0 2565.75 202.519   8
  -1 -11   0 2460.24 216.966   6
  -1  11   0 2848.78 229.714  10
   1  11   0 2609.70 218.441   8
   1 -11   0 2711.05 220.651   6
   1  11   0 2514.84 209.173  10
   1  11   1 15239.5 531.020  10
   1 -11   1 14475.0 527.110   6
  -1 -11  -1 13815.0 527.403   6
   1  11   1 15962.9 546.908   8
  -1  11  -1 14803.6 529.338  10
   1 -11   2 16137.1 552.010   6
  -1  11  -2 16658.5 404.872  12
  -1  11  -2 16413.3 567.488  10
   1  11   2 15426.3 540.669  10
  -1 -11  -2 13993.6 537.998   6
  -1 -11  -2 15978.1 376.830   4
   1  11   2 15834.4 548.796   8
  -1  11  -3 479.959 126.732  10
   1  11   3 173.501 101.325  10
  -1 -11  -3 329.030 46.8223   4
   1 -11   3 366.574 120.217   6
  -1  11  -3 359.656 57.6525  12
   1  11   3 289.757 99.2099   8
  -1 -11  -3 442.589 130.951   6
   1 -11   4 5981.03 324.195   6
  -1  11  -4 5523.08 317.300  10
   1  11   4 5529.17 299.729   8
   1  11   4 5627.46 310.257  10
  -1 -11  -4 5817.24 175.754   4
  -1  11  -4 5556.35 221.389  12
  -1 -11  -4 5678.06 324.180   6
   1 -11   5 17164.6 584.935   6
   1  11   5 17083.0 570.308   8
   1 -11   5 17661.4 606.604   7
  -1  11  -5 16581.9 466.944  12
   1  11   5 17729.5 354.634  11
  -1  11  -5 16422.8 590.250  10
  -1 -11  -5 17276.4 600.857   6
   1  11   5 17595.5 588.719  10
   1 -11   6 531.634 146.941   7
   1  11   6 427.264 44.6661  11
  -1 -11  -6 661.299 144.240   6
   1 -11   6 436.291 126.079   6
   1  11   6 485.777 120.018  10
  -1  11  -6 333.430 111.314  10
   1  11   6 477.854 115.058   8
  -1  11  -7 21541.7 702.160  10
  -1 -11  -7 20069.1 604.901   9
   1  11   7 21319.7 682.486  10
   1  11   7 20909.2 648.767   8
  -1 -11  -7 20351.5 678.483   6
   1  11   7 22110.2 460.184  11
   1 -11   7 20864.5 666.262   6
   1 -11   7 21365.6 693.566   7
  -1  11  -8 48184.9 1216.56  10
  -1 -11  -8 50899.9 1108.32   9
  -1 -11  -8 46288.4 1191.80   6
   1  11   8 49919.1 1199.06  10
   1  11   8 47678.8 1150.39   8
   1 -11   8 51666.6 1231.58   7
  -1 -11  -9 3200.55 259.664   6
   1  11   9 3764.27 257.420   8
   1 -11   9 3223.28 272.702   7
  -1  11  -9 3223.69 267.644  10
  -1 -11  -9 3958.49 225.289   9
   1  11   9 3444.99 266.988  10
   1 -11  10 717.820 173.234   7
  -1 -11 -10 844.323 155.584   6
  -1  11 -10 611.771 144.685  10
  -1 -11 -10 739.913 112.584   9
   1  11  10 668.191 135.871   8
   1  11  11 5444.59 311.576   8
   1 -11  11 6009.92 365.119   7
   1  11  11 5599.31 191.372   4
  -1  11 -11 5600.97 358.754  10
  -1 -11 -11 6358.80 283.848   9
  -1 -11 -11 5659.12 343.653   6
  -1  11 -12 9433.18 475.681  10
  -1 -11 -12 9388.02 355.980   9
  -1 -11 -12 10264.8 466.516   6
   1  11  12 9749.27 282.111   4
   1  11  12 9386.22 416.976   8
   1 -11  12 9992.55 483.004   7
  -1 -11 -13 19074.3 556.631   9
   1  11  13 19573.1 645.894   8
  -1  11 -13 19117.0 717.966  10
   1 -11  13 20657.3 726.542   7
  -1 -11 -13 19176.4 683.161   6
  -1 -11 -14 18467.0 671.310   6
   1  11  14 16770.2 602.483   8
   1 -11  14 18177.2 691.934   7
  -1 -11 -14 18007.8 528.784   9
  -1  11 -14 17679.8 699.965  10
  -1  11 -15 20427.6 770.910  10
   1 -11  15 19916.8 743.454   7
   1  11  15 20317.1 675.266   8
  -1 -11 -15 19455.7 720.497   6
   1 -11  16 36874.9 1100.12   7
  -1 -11 -16 36992.6 1062.25   6
   1  11  16 37037.4 1006.04   8
  -1  11 -16 36543.9 1113.85  10
   1  11  17 4674.29 313.368   8
  -1  11 -17 4794.59 368.481  10
  -1 -11 -17 4528.90 337.395   6
   1 -11  17 4662.43 371.876   7
   1 -11  18 14219.7 647.159   7
  -1 -11 -18 13631.1 597.957   6
   1  11  18 14134.1 563.301   8
  -1  11 -18 12902.2 627.795  10
   1  11  19-156.814 128.991   8
   1 -11  19 187.089 164.253   7
  -1 -11 -19 73.9330 154.328   6
  -1  11 -19 172.761 182.086  10
  -1  11 -20 13420.0 673.825  10
   1  11  20 14120.9 574.571   8
  -1 -11 -20 12350.2 592.981   6
   1 -11  20 13372.9 595.700  12
   1 -11  20 13447.4 653.219   7
   1 -11  21 53.8283 157.968   7
  -1  11 -21-144.692 182.205  10
   1  11  21 66.0819 133.719   8
  -1 -11 -21 15.8481 132.272   6
   1 -11  21 24.8291 137.269  12
  -1  11 -22 1028.22 230.224  10
   1 -11  22 1166.19 204.851  12
   1  11  22 640.874 157.574   8
  -1 -11 -22 995.109 194.341   6
   1 -11  22 420.637 187.047   7
  -1 -11 -22 1561.75 288.242   1
   1  11  23 2461.36 257.836   8
   1 -11  23 2403.77 304.429   7
  -1 -11 -23 2407.63 281.735   6
   1 -11  23 2773.72 297.410  12
  -1  11 -23 2247.20 295.796  10
  -1 -11 -23 2749.87 340.515   1
   1 -11  24 163.637 156.919  12
   1 -11  24 372.802 187.651   7
   1  11  24 216.378 129.197   8
  -1 -11 -24 35.5171 166.029   1
  -1 -11 -24 338.753 162.394   6
  -1  11 -24 213.224 191.790  10
   1 -11  25 3130.90 364.579   7
  -1 -11 -25 2510.29 328.541   1
   1 -11  25 3072.99 334.317  12
   1  11  25 3021.11 301.652   8
  -1  11 -25 3142.18 367.372  10
  -1 -11 -25 2714.43 313.079   6
   1  11  26 7718.80 469.419   8
  -1 -11 -26 8804.37 598.297   1
  -1 -11 -26 8252.84 518.101   6
   1 -11  26 7513.24 513.726  12
   1 -11  26 7717.65 552.328   7
   1 -11  27 202.329 189.662   7
  -1 -11 -27-121.232 195.168   1
   1  11  27 185.092 145.388   8
  -1 -11 -27 60.7468 147.240   6
   1 -11  27 30.5303 161.586  12
   1 -11  28 414.792 223.065   7
   1  11  28 474.735 179.778   8
  -1 -11 -28 679.135 230.270   1
  -1 -11 -28 672.607 210.881   6
   1 -11  28 435.608 166.480  12
  -1 -11 -29 1381.99 258.930   6
   1  11  29 1021.20 208.778   8
   1 -11  29 971.206 244.015   7
   1 -11  29 1001.88 238.158  12
  -1 -11 -29 1061.34 251.545   1
   1 -11  30 652.156 252.194   7
   1  11  30 586.353 177.711   8
  -1 -11 -30 391.431 183.232   6
  -1 -11 -30 496.039 209.861   1
   1 -11  30 538.337 239.666  12
  -1 -11 -31 419.285 204.175   6
  -1 -11 -31 184.308 190.295   1
   1 -11  31 925.801 293.726   7
   1 -11  31 383.458 238.011  12
  -1 -11 -32 10020.7 711.323   1
   1 -11  32 10265.9 679.601  12
   1 -11  32 11612.9 744.664   7
  -1 -11 -32 11185.4 660.518   6
  -1 -11 -33 573.400 213.876   6
   1 -11  33 757.424 281.802   7
  -1 -11 -33 676.696 261.915   1
   1 -11  34 2301.77 374.795   7
  -1 -11 -34 1677.43 284.541   6
  -1 -11 -35 0.48724 169.782   6
  -1  12  35 613.596 260.850  12
   1 -12 -34 255.171 188.232   1
  -1  12  34 277.944 255.625  12
   1 -12 -34-31.7900 184.312   6
  -1  12  33 5460.16 539.755  12
   1 -12 -33 4147.47 456.241   1
  -1 -12  33 4644.73 515.028   7
   1 -12 -33 3997.48 436.980   6
  -1  12  32 1748.89 328.559  12
   1 -12 -32 2114.46 350.226   6
  -1 -12  32 1859.90 342.544   7
   1 -12 -32 2046.41 335.510   1
  -1  12  31 10888.8 734.216  12
   1 -12 -31 13026.4 785.412   1
   1 -12 -31 12315.3 729.561   6
  -1 -12  31 13502.5 814.181   7
   1 -12 -30 10593.3 704.410   1
  -1 -12  30 10785.9 720.693   7
   1 -12 -30 10352.9 659.962   6
  -1 -12  29 1183.30 310.541   7
   1 -12 -29 976.334 257.729   6
   1 -12 -29 586.313 225.558   1
   1 -12 -28 3021.75 361.233   6
  -1 -12  28 2921.27 393.657   7
   1 -12 -28 2405.76 330.432   1
  -1 -12  27 326.662 241.049   7
   1 -12 -27 479.275 209.975   6
   1  12 -26 4213.90 438.834  10
   1 -12 -26 5029.65 430.765   6
  -1 -12  26 4158.12 432.766   7
   1  12 -25 3955.04 409.990  10
  -1 -12  25 4438.48 436.813   7
   1 -12 -25 3858.49 386.540   6
   1 -12 -24 102.528 155.936   6
   1  12 -24 150.937 212.745  10
  -1 -12  24 251.626 206.773   7
   1  12 -23 5728.50 469.681  10
  -1 -12  23 6405.30 495.156   7
   1 -12 -23 6932.06 488.797   6
   1 -12 -22-95.3923 139.641   6
   1  12 -22 15.7095 176.243  10
  -1 -12  22-110.409 188.437   7
   1  12 -21 162.709 178.802  10
  -1 -12  21-3.15180 173.133   7
   1 -12 -21 194.977 177.541   6
  -1  12  21 172.375 95.3595   8
   1  12 -20 26058.0 965.146  10
  -1  12  20 25733.6 733.615   8
  -1 -12  20 24778.2 940.140   7
   1 -12 -20 24237.2 914.697   6
   1  12 -19 332.432 172.362  10
  -1 -12  19 330.095 176.322   7
   1 -12 -19 382.998 203.105   6
  -1  12  19 259.464 85.7964   8
   1 -12 -18 9683.19 536.382   6
  -1  12  18 10051.5 405.159   8
   1  12 -18 10696.5 576.515  10
  -1 -12  18 10155.0 558.785   7
  -1 -12  17 8511.50 504.178   7
   1  12 -17 7812.37 490.160  10
  -1  12  17 8458.48 361.672   8
   1 -12 -17 8571.68 491.040   6
  -1  12  16 14014.0 476.584   8
  -1 -12  16 13345.2 630.381   7
   1 -12 -16 13692.6 620.856   6
   1  12 -16 13466.3 629.528  10
   1  12 -15 8630.77 484.591  10
  -1  12  15 7847.70 338.750   8
   1 -12 -15 7958.28 457.094   6
  -1 -12  15 8021.21 465.476   7
  -1 -12  14 961.803 196.825   7
  -1  12  14 1085.93 129.307   8
   1  12 -14 733.003 197.677  10
   1 -12 -14 831.484 67.6969   9
   1 -12 -14 1061.51 189.619   6
   1 -12 -13 3844.06 158.771   9
   1  12 -13 4174.34 327.681  10
   1 -12 -13 3887.05 317.354   6
  -1  12  13 3913.52 231.866   8
  -1 -12  13 3926.99 318.384   7
   1 -12 -12 3377.27 297.657   6
   1 -12 -12 4233.91 174.120   9
  -1  12  12 3466.16 217.327   8
  -1 -12  12 3688.17 303.320   7
   1  12 -12 3274.71 292.218  10
   1 -12 -11 1716.15 221.998   6
   1 -12 -11 2012.75 127.669   9
   1  12 -11 1749.66 222.564  10
  -1  12  11 1817.35 157.577   8
  -1 -12  11 1924.89 229.205   7
  -1 -12  10 28856.9 890.923   7
  -1  12  10 30194.8 755.832   8
   1 -12 -10 29283.5 902.370   6
   1  12 -10 28870.8 895.697  10
  -1  12  10 28269.8 872.401  10
   1 -12  -9 429.335 154.673   6
  -1  12   9 594.955 147.287  10
  -1  12   9 694.513 110.026   8
   1  12  -9 960.992 183.107  10
  -1  12   9 686.200 103.243  11
  -1 -12   9 644.984 165.502   7
  -1  12   8 4347.37 226.951  11
   1 -12  -8 4525.50 315.761   6
  -1  12   8 4210.25 238.705   8
   1 -12  -8 4566.06 239.997   4
  -1 -12   8 4260.76 304.451   7
  -1  12   8 3863.36 289.904  10
   1  12  -8 4357.69 323.284   8
   1  12  -8 4339.15 313.555  10
   1  12  -7 280.506 144.929   8
  -1 -12   7 169.327 113.622   7
  -1  12   7-9.85694 117.909  10
  -1  12   7 244.394 93.2375   8
   1 -12  -7 109.305 119.911   6
  -1  12   7 84.3491 61.9112  11
   1  12  -7 100.092 125.698  10
   1 -12  -7 207.160 78.6295   4
  -1  12   6 24178.3 747.876  10
   1  12  -6 22612.4 770.138   8
   1 -12  -6 23132.9 752.830   6
  -1  12   6 24091.4 656.577   8
  -1 -12   6 24526.5 749.453   7
   1 -12  -6 23269.4 626.580   4
   1  12  -6 21847.1 729.000  10
  -1  12   6 23159.7 601.908  11
  -1 -12   5 1675.77 202.789   7
  -1  12   5 1376.75 185.714  10
   1  12  -5 1331.95 194.858   8
  -1  12   5 1612.52 158.997   8
   1 -12  -5 1141.83 172.782   6
   1 -12  -5 1095.43 123.643   4
  -1  12   5 1319.92 126.062  11
   1  12  -5 1503.36 188.119  10
  -1  12   4 200.387 94.7628   8
   1 -12  -4 192.396 74.9202   4
  -1 -12   4 177.294 129.165   6
   1  12  -4 204.465 125.115   8
   1  12  -4 278.954 125.270  10
  -1 -12   4 222.200 50.7948  11
   1 -12  -4 166.593 119.404   6
  -1  12   4 0.20504 122.910  10
  -1  12   4 239.513 68.6437  11
  -1 -12   4 199.160 122.331   7
  -1  12   3 12894.0 509.537  10
   1 -12  -3 13139.6 430.151   4
   1  12  -3 12978.3 533.462   8
   1 -12  -3 13344.1 525.302   6
  -1 -12   3 12446.3 328.488  11
   1  12  -3 12917.7 510.410  10
  -1 -12   3 13435.8 530.881   6
  -1  12   3 13627.9 413.673  11
  -1  12   3 13457.4 474.395   8
  -1 -12   3 13256.7 513.398   7
   1  12  -2 2251.23 222.864  10
  -1  12   2 2361.15 201.352   8
   1 -12  -2 2384.68 227.016   6
   1 -12  -2 2158.42 171.139   4
   1  12  -2 2119.08 208.866   8
  -1  12   2 1968.59 210.278  10
  -1 -12   2 2419.17 110.755  11
  -1 -12   2 2581.67 229.229   7
  -1 -12   2 2173.67 222.379   6
  -1  12   2 2145.26 155.241  11
   1  12  -1 2636.05 231.045  10
   1 -12  -1 2533.88 231.501   6
   1 -12  -1 2510.97 185.268   4
  -1 -12   1 2184.24 221.511   6
   1  12  -1 2310.32 218.159   8
  -1  12   1 2213.99 200.830   8
  -1  12   1 2196.13 216.215  10
   1  12   0 1138.43 174.677  10
  -1  12   0 1366.97 159.446   8
  -1 -12   0 1120.93 176.889   6
   1 -12   0 862.002 143.256   6
   1  12   0 1251.57 178.427   8
  -1  12   0 1242.99 170.409  10
   1  12   1 8563.59 403.442  10
  -1 -12  -1 8992.07 422.887   6
   1  12   1 9135.95 422.205   8
  -1  12  -1 9292.85 429.367  10
   1 -12   1 9155.65 418.795   6
   1 -12   2 416.657 128.627   6
  -1 -12  -2 417.430 138.364   6
  -1  12  -2-21.9111 126.658  10
   1  12   2 209.282 95.6898   8
  -1  12  -2 412.139 62.2104  12
   1  12   2 151.598 108.155  10
  -1 -12  -2 252.926 54.6383   4
   1  12   3 18477.3 647.188  10
  -1  12  -3 20325.7 680.247  10
   1 -12   3 20569.0 671.408   6
   1  12   3 21693.5 671.553   8
  -1  12  -3 21149.6 509.335  12
  -1 -12  -3 20776.6 460.408   4
  -1 -12  -3 20962.3 685.504   6
   1 -12   4 8326.43 404.983   6
  -1  12  -4 8506.69 291.896  12
  -1 -12  -4 8203.15 408.441   6
  -1  12  -4 8826.56 417.822  10
   1  12   4 7887.03 380.750   8
  -1 -12  -4 8264.52 233.138   4
   1 -12   4 8069.27 409.298   7
   1  12   4 7354.90 385.199  10
   1 -12   5 38129.1 1007.13   6
  -1 -12  -5 38095.6 1021.47   6
   1  12   5 39995.3 1002.87   8
  -1  12  -5 38699.9 1033.87  10
   1  12   5 35653.7 991.024  10
   1 -12   5 38946.9 1030.43   7
  -1  12  -5 37963.0 849.318  12
   1 -12   6 8714.61 419.458   6
   1  12   6 8217.76 392.460   8
   1 -12   6 8632.45 429.324   7
   1  12   6 8454.64 410.734  10
   1  12   6 9067.49 222.083  11
  -1  12  -6 8972.05 437.519  10
  -1 -12  -6 9022.47 436.513   6
   1  12   7 15.3436 28.2818  11
   1 -12   7 109.919 113.352   6
   1  12   7-183.613 144.176  10
  -1 -12  -7-33.1105 85.6649   9
   1 -12   7 69.3837 116.302   7
  -1  12  -7 66.3182 118.360  10
   1  12   7-33.1658 100.612   8
  -1 -12  -7 99.2370 113.963   6
  -1  12  -8 3514.38 281.221  10
  -1 -12  -8 3418.27 270.018   6
   1  12   8 3142.11 245.545   8
   1 -12   8 3332.03 277.773   7
  -1 -12  -8 3537.20 229.145   9
   1  12   8 3610.54 146.529  11
   1  12   8 3003.29 247.243  10
   1 -12   9 20113.9 713.453   7
  -1 -12  -9 21670.6 621.676   9
   1  12   9 21625.1 721.635  10
  -1 -12  -9 21224.0 719.442   6
   1  12   9 20734.9 668.375   8
  -1  12  -9 20788.0 723.228  10
  -1 -12 -10 30648.2 770.655   9
   1  12  10 26803.3 852.023  10
  -1 -12 -10 29667.5 888.502   6
  -1  12 -10 29089.3 904.397  10
   1  12  10 28597.5 830.360   8
   1 -12  10 29245.1 894.833   7
  -1 -12 -11 18012.5 663.246   6
   1  12  11 16819.7 598.155   8
  -1  12 -11 17321.8 665.427  10
   1 -12  11 17163.1 657.645   7
  -1 -12 -11 17840.6 544.950   9
  -1 -12 -12 11799.2 535.733   6
  -1 -12 -12 12231.5 428.599   9
   1  12  12 12555.7 499.475   8
   1 -12  12 11376.4 544.247   7
  -1  12 -12 12084.3 563.170  10
   1  12  13 1747.28 190.316   8
  -1 -12 -13 1564.19 217.089   6
  -1 -12 -13 1834.95 164.467   9
   1 -12  13 2096.97 255.202   7
  -1  12 -13 1820.67 240.692  10
  -1 -12 -14 13857.7 594.524   6
   1  12  14 14252.5 547.547   8
  -1  12 -14 13137.5 625.096  10
  -1 -12 -14 13326.7 452.306   9
   1 -12  14 13443.3 600.916   7
  -1  12 -15 1373.57 226.493  10
   1 -12  15 1174.62 219.098   7
  -1 -12 -15 960.937 191.694   6
   1  12  15 999.260 162.176   8
  -1 -12 -16 4530.76 342.810   6
   1 -12  16 4754.14 367.631   7
  -1  12 -16 4665.17 369.585  10
   1  12  16 4232.04 299.750   8
   1 -12  17 222.988 163.525   7
  -1 -12 -17 173.118 147.245   6
   1  12  17 214.721 122.506   8
  -1  12 -17-57.4704 178.520  10
   1 -12  18 11905.7 601.705   7
   1  12  18 11312.7 512.463   8
  -1 -12 -18 11702.9 570.432   6
  -1  12 -18 12032.0 617.589  10
   1 -12  19 624.754 208.612   7
  -1  12 -19 533.914 180.248  10
  -1 -12 -19 627.359 199.013   6
   1  12  19 675.146 164.171   8
  -1 -12 -20 20356.0 795.846   6
   1  12  20 19945.3 727.998   8
  -1  12 -20 21509.2 868.341  10
   1 -12  20 20632.0 839.274   7
   1 -12  21 943.534 239.983   7
   1  12  21 1277.90 202.592   8
  -1  12 -21 1471.45 262.463  10
  -1 -12 -21 854.636 214.569   6
  -1 -12 -22 6222.73 436.731   6
  -1  12 -22 5854.64 467.126  10
   1  12  22 5838.16 382.898   8
   1 -12  22 6547.61 476.710   7
  -1 -12 -23 693.043 195.247   6
  -1  12 -23 640.831 235.335  10
   1  12  23 767.760 178.378   8
   1 -12  23 645.741 223.791   7
  -1 -12 -23 1672.44 316.555   1
  -1 -12 -24 1923.63 326.803   1
  -1  12 -24 2350.30 338.084  10
  -1 -12 -24 1854.80 271.049   6
   1  12  24 1868.98 238.674   8
   1 -12  24 1794.52 286.200   7
   1  12  25 3704.50 327.688   8
  -1 -12 -25 3444.92 348.726   6
   1 -12  25 3748.08 405.686   7
  -1 -12 -25 3801.97 403.086   1
  -1  12 -25 3581.98 404.453  10
   1  12  26 959.155 191.809   8
  -1 -12 -26 920.208 214.602   6
  -1 -12 -26 850.939 233.993   1
   1 -12  26 1049.75 275.264   7
  -1  12 -26 952.275 257.837  10
   1  12  27 3196.11 320.624   8
  -1 -12 -27 3070.72 371.535   1
  -1 -12 -27 3818.49 379.349   6
   1 -12  27 3496.83 413.909   7
  -1 -12 -28 4800.56 423.064   6
   1 -12  28 4774.38 472.171   7
  -1 -12 -28 5457.56 497.536   1
   1  12  28 4989.02 393.171   8
  -1 -12 -29 631.523 234.200   1
  -1 -12 -29 589.145 220.984   6
   1 -12  29 751.171 280.780   7
  -1 -12 -30 4694.88 433.715   6
  -1 -12 -30 5020.98 496.748   1
   1 -12  30 4304.30 463.038   7
   1 -12  31 145.487 209.826   7
  -1 -12 -31-289.628 209.509   1
  -1 -12 -31 222.484 181.144   6
  -1 -12 -32 615.773 228.537   6
   1 -12  32-143.966 242.230   7
  -1 -12 -32 343.689 217.285   1
  -1 -12 -33 357.846 195.225   6
   1 -12  33-118.988 211.668   7
  -1 -12 -34 1319.80 278.374   6
  -1 -12 -35-276.036 215.229   6
  -1  13  35-294.592 241.359  12
   1 -13 -34 7447.86 599.398   6
  -1  13  34 7220.17 625.344  12
  -1  13  33 127.953 210.014  12
   1 -13 -33 226.621 206.541   6
   1 -13 -33 157.749 190.963   1
   1 -13 -32-142.972 175.265   6
  -1 -13  32 98.3363 267.228   7
   1 -13 -32-512.118 243.526   1
  -1  13  32-10.0945 204.890  12
  -1  13  31 3448.70 442.143  12
   1 -13 -31 2959.13 374.828   6
  -1 -13  31 3351.81 432.102   7
   1 -13 -31 3384.95 406.198   1
   1 -13 -30 6368.33 533.460   6
   1 -13 -30 7582.36 594.052   1
  -1 -13  30 7416.85 605.639   7
  -1 -13  29 470.859 274.590   7
   1 -13 -29 399.686 220.484   6
   1 -13 -29 583.738 212.474   1
   1 -13 -28 3692.99 407.039   6
   1 -13 -28 5214.90 486.494   1
  -1 -13  28 4580.62 480.932   7
  -1 -13  27 7262.15 580.743   7
   1 -13 -27 6726.64 518.845   6
   1  13 -27 7849.24 596.795  10
   1 -13 -26 9584.72 614.816   6
  -1 -13  26 10750.7 681.895   7
   1  13 -26 10575.9 688.270  10
  -1 -13  25 1214.50 278.557   7
   1  13 -25 826.751 250.090  10
   1 -13 -25 805.119 230.251   6
  -1 -13  24 415.694 226.161   7
   1  13 -24 54.4957 205.670  10
   1 -13 -24 326.711 170.906   6
   1  13 -23 345.731 215.271  10
  -1 -13  23 377.691 197.380   7
   1 -13 -23 758.474 221.422   6
   1  13 -22 32.3543 168.854  10
   1 -13 -22 150.760 143.664   6
  -1 -13  22-12.6747 178.315   7
   1  13 -21 89.2622 175.524  10
   1 -13 -21 238.975 180.488   6
  -1 -13  21-33.4992 166.578   7
  -1  13  20 116.853 84.8726   8
   1  13 -20 123.622 167.071  10
   1 -13 -20 223.239 160.535   6
  -1 -13  20 205.795 190.592   7
  -1 -13  19 345.804 202.701   7
   1  13 -19 123.351 170.344  10
  -1  13  19 53.1372 75.5765   8
   1 -13 -19 370.691 191.347   6
   1  13 -18 15559.7 720.675  10
  -1  13  18 16554.7 553.179   8
   1 -13 -18 15600.4 707.921   6
  -1 -13  18 16077.1 734.492   7
  -1 -13  17 410.796 197.792   7
   1  13 -17 271.508 171.440  10
  -1  13  17 494.581 110.049   8
   1 -13 -17 470.719 186.016   6
  -1  13  16-9.85752 74.9956   8
   1  13 -16 59.0381 151.854  10
  -1 -13  16 73.5225 163.359   7
   1 -13 -16 118.053 137.300   6
   1  13 -15 1902.97 266.352  10
  -1  13  15 1542.81 157.009   8
   1 -13 -15 1637.67 239.493   6
  -1 -13  15 2158.12 276.242   7
   1  13 -14 6072.07 417.240  10
   1 -13 -14 6413.27 414.273   6
  -1 -13  14 6026.01 408.886   7
  -1  13  14 5976.40 303.070   8
  -1 -13  13 155.393 141.594   7
   1 -13 -13 245.662 158.243   6
  -1  13  13 335.958 91.3629   8
   1 -13 -13 299.806 62.3767   9
   1  13 -13 48.9385 146.825  10
   1  13 -12 479.793 164.060  10
   1 -13 -12 706.964 164.910   6
  -1 -13  12 875.520 188.397   7
   1 -13 -12 811.929 88.2333   9
  -1  13  12 416.516 132.560  10
  -1  13  12 674.777 117.486   8
  -1  13  11 1451.63 152.566  11
   1 -13 -11 1532.22 209.898   6
  -1 -13  11 1577.46 226.071   7
  -1  13  11 1505.83 152.115   8
   1  13 -11 1236.02 204.920  10
  -1  13  11 1319.38 202.723  10
   1 -13 -10 2683.12 266.261   6
   1  13 -10 2795.01 266.100  10
  -1  13  10 2732.71 193.539  11
  -1  13  10 2769.97 204.745   8
  -1 -13  10 2710.39 264.780   7
  -1  13  10 2968.83 276.980  10
   1 -13  -9 1399.23 212.724   6
  -1  13   9 1157.30 179.136  10
  -1  13   9 1465.78 142.372  11
   1  13  -9 1430.79 207.886  10
  -1  13   9 1428.15 154.877   8
  -1 -13   9 1311.15 190.572   7
  -1  13   8 13373.9 551.487  10
   1 -13  -8 12787.7 437.891   4
  -1 -13   8 12124.4 537.531   7
  -1  13   8 13074.6 463.775   8
   1  13  -8 12807.6 557.823  10
   1 -13  -8 12786.3 556.923   6
  -1  13   8 13027.5 428.202  11
   1  13  -8 12743.8 573.538   8
   1 -13  -7 1515.16 147.935   4
  -1  13   7 1783.35 150.523  11
   1 -13  -7 2068.29 238.506   6
   1  13  -7 1817.40 235.837   8
  -1  13   7 1746.80 204.922  10
   1  13  -7 2165.76 239.276  10
  -1 -13   7 1802.48 222.197   7
  -1  13   7 1912.93 173.027   8
   1  13  -6 799.789 166.648   8
   1 -13  -6 621.861 105.580   4
  -1  13   6 758.914 101.254  11
  -1 -13   6 834.758 179.902   7
  -1  13   6 1009.28 139.048   8
  -1  13   6 775.434 159.568  10
   1 -13  -6 832.572 168.628   6
   1  13  -6 722.613 157.166  10
  -1  13   5 14025.1 492.082   8
   1 -13  -5 13365.5 561.385   6
   1 -13  -5 13614.7 454.431   4
   1  13  -5 13293.2 547.985  10
  -1 -13   5 13381.6 546.616   7
   1  13  -5 14708.9 601.665   8
  -1  13   5 13470.7 546.125  10
  -1  13   5 14181.6 432.548  11
  -1 -13   4 3384.17 273.410   7
   1 -13  -4 3299.60 272.632   6
  -1  13   4 3242.51 266.557  10
  -1  13   4 3482.76 237.085   8
  -1 -13   4 3974.96 297.992   6
   1  13  -4 2869.29 264.050   8
  -1 -13   4 3363.62 155.968  11
   1  13  -4 3801.62 283.969  10
   1 -13  -4 3387.76 209.643   4
  -1  13   4 3379.36 197.412  11
   1  13  -3 22359.1 721.639  10
  -1 -13   3 22322.6 490.690  11
  -1  13   3 20856.3 654.492   8
   1 -13  -3 21401.3 604.225   4
  -1 -13   3 20926.9 721.071   6
  -1  13   3 20450.2 569.806  11
  -1  13   3 20334.7 703.525  10
   1 -13  -3 21200.7 721.436   6
  -1 -13   3 21862.9 706.707   7
   1  13  -3 20798.0 723.141   8
  -1 -13   2 25418.5 823.993   6
   1 -13  -2 27739.8 720.300   4
   1  13  -2 27193.8 827.328  10
   1 -13  -2 26190.8 825.446   6
  -1  13   2 26587.3 775.334   8
  -1  13   2 27175.0 834.839  10
  -1 -13   2 28018.3 569.144  11
   1  13  -2 27790.9 851.574   8
  -1 -13   2 27843.9 819.600   7
   1  13  -1 3372.77 271.666  10
   1 -13  -1 3239.59 267.285   6
   1 -13  -1 3448.03 219.543   4
  -1  13   1 3135.21 266.454  10
   1  13  -1 3716.79 285.203   8
  -1 -13   1 3301.05 276.852   6
  -1  13   1 3273.44 246.176   8
   1 -13   0 27106.5 831.161   6
   1  13   0 28003.6 838.770   8
  -1 -13   0 28335.3 856.336   6
  -1  13   0 28835.2 849.732  10
   1  13   0 28047.7 837.275  10
  -1  13   0 27038.5 802.184   8
   1  13   1 713.914 146.766  10
  -1 -13  -1 859.930 166.774   6
   1  13   1 872.174 160.882   8
  -1  13  -1 656.744 152.272  10
   1 -13   1 842.205 170.336   6
  -1 -13  -2 18314.3 442.003   4
   1  13   2 17505.8 628.977  10
   1 -13   2 18337.6 641.773   6
  -1  13  -2 17658.4 459.838  12
   1  13   2 19062.3 649.174   8
  -1  13  -2 17687.6 644.951  10
  -1 -13  -2 18566.8 655.848   6
  -1  13  -3 2686.92 252.096  10
  -1  13  -3 2750.77 154.015  12
   1  13   3 2530.64 230.625  10
  -1 -13  -3 3022.12 265.105   6
   1  13   3 2749.60 236.300   8
   1 -13   3 2859.48 244.265   6
  -1 -13  -3 2970.49 138.261   4
  -1  13  -4 2541.90 243.307  10
  -1 -13  -4 2678.67 126.112   4
   1 -13   4 2562.88 237.221   6
   1  13   4 2615.49 238.656  10
   1  13   4 2914.27 238.765   8
   1 -13   4 2640.98 256.955   7
  -1 -13  -4 2574.00 245.040   6
  -1  13  -4 2298.84 148.494  12
   1 -13   5 7654.81 402.624   6
   1  13   5 7315.55 390.039  10
   1 -13   5 7561.00 414.258   7
  -1 -13  -5 6999.87 396.425   6
   1  13   5 6773.07 367.736   8
  -1  13  -5 7133.28 395.255  10
   1  13   6 52419.9 1266.55   8
   1 -13   6 50436.0 1281.20   6
  -1  13  -6 52547.2 1313.52  10
   1  13   6 52223.5 1289.13  10
   1 -13   6 51095.2 1303.37   7
  -1 -13  -6 53297.7 1314.07   6
   1  13   7 6996.27 196.943  11
  -1 -13  -7 6891.15 398.182   6
  -1  13  -7 7473.73 417.768  10
   1 -13   7 6943.98 388.878   6
   1  13   7 6696.72 362.375   8
   1  13   7 7324.25 395.327  10
   1 -13   7 7289.98 413.627   7
  -1  13  -8-196.268 159.746  10
   1  13   8 265.490 118.340   8
  -1 -13  -8 180.225 136.406   6
   1  13   8 43.6648 31.9326  11
   1  13   8-48.4089 134.339  10
  -1 -13  -8 139.853 81.8242   9
   1 -13   8-119.953 135.593   7
   1 -13   9 4229.40 330.990   7
   1  13   9 4417.82 292.760   8
  -1  13  -9 4331.75 324.901  10
  -1 -13  -9 4933.93 275.818   9
  -1 -13  -9 4338.66 323.939   6
   1  13   9 4613.49 177.218  11
   1  13   9 4233.18 309.819  10
  -1  13 -10 2821.32 281.566  10
  -1 -13 -10 3053.89 222.226   9
   1 -13  10 2959.31 280.708   7
  -1 -13 -10 3171.90 288.028   6
   1  13  10 2886.42 266.635  10
   1  13  10 3148.69 250.924   8
  -1  13 -11 2855.83 278.865  10
  -1 -13 -11 2865.99 209.019   9
  -1 -13 -11 2870.57 271.119   6
   1 -13  11 3176.67 295.680   7
   1  13  11 2906.32 274.704  10
   1  13  11 2715.33 238.848   8
   1 -13  12 19520.6 746.543   7
  -1 -13 -12 20446.8 747.958   6
   1  13  12 20749.6 687.359   8
  -1 -13 -12 19881.1 594.685   9
  -1  13 -12 19467.2 751.840  10
   1  13  12 18875.3 719.762  10
   1 -13  13 245.570 156.838   7
  -1  13 -13 546.923 181.899  10
  -1 -13 -13 600.272 168.584   6
  -1 -13 -13 684.897 115.564   9
   1  13  13 438.469 122.625   8
  -1 -13 -14 16192.6 522.868   9
   1 -13  14 17480.2 710.655   7
  -1 -13 -14 16168.3 668.433   6
   1  13  14 16540.3 622.760   8
  -1  13 -14 17513.7 719.665  10
   1 -13  15 6793.17 437.094   7
  -1  13 -15 6522.23 450.016  10
   1  13  15 6615.31 375.529   8
  -1 -13 -15 6219.07 414.626   6
  -1 -13 -15 6538.89 305.844   9
  -1 -13 -16 227.642 157.744   6
  -1  13 -16 17.3860 174.362  10
   1 -13  16 61.0160 162.542   7
   1  13  16 169.341 113.770   8
   1  13  17 1149.37 195.373   8
  -1  13 -17 1346.00 250.968  10
  -1 -13 -17 1156.77 209.119   6
   1 -13  17 1256.77 224.893   7
  -1 -13 -18 583.890 173.474   6
   1 -13  18 479.822 191.731   7
  -1  13 -18 811.800 214.056  10
   1  13  18 525.401 140.491   8
  -1 -13 -19 2320.90 274.707   6
  -1  13 -19 2927.79 335.855  10
   1  13  19 2023.06 233.328   8
   1 -13  19 2290.38 301.342   7
   1 -13  20 1551.41 260.443   7
  -1 -13 -20 1955.97 268.018   6
   1  13  20 1673.16 220.295   8
  -1  13 -20 1760.47 282.826  10
  -1  13 -21 258.941 192.480  10
  -1 -13 -21 321.940 174.330   6
   1 -13  21 687.661 229.580   7
   1  13  21 98.5403 118.129   8
  -1  13 -22 7028.02 519.406  10
   1  13  22 7725.89 449.938   8
  -1 -13 -22 7668.28 491.417   6
   1 -13  22 7002.31 511.600   7
   1 -13  23 173.539 198.283   7
   1  13  23 200.787 148.150   8
  -1 -13 -23 527.688 198.841   6
  -1  13 -23 105.756 177.041  10
   1 -13  24 5120.33 462.216   7
  -1 -13 -24 5303.11 424.227   6
  -1  13 -24 4513.01 430.722  10
  -1 -13 -24 5633.18 494.358   1
   1  13  24 4614.97 362.378   8
  -1  13 -25 809.274 258.518  10
  -1 -13 -25 864.723 232.938   6
   1 -13  25 705.808 258.030   7
   1  13  25 1056.77 212.413   8
  -1 -13 -25 480.076 197.519   1
   1  13  26 6620.08 438.922   8
  -1 -13 -26 5667.67 506.350   1
   1 -13  26 6117.19 519.507   7
  -1  13 -26 6841.93 553.377  10
  -1 -13 -26 6310.73 476.421   6
  -1 -13 -27 1369.07 261.181   6
  -1  13 -27 1818.66 356.242  10
  -1 -13 -27 1304.48 276.612   1
   1 -13  27 1761.07 340.113   7
   1  13  27 1483.55 248.602   8
  -1 -13 -28 2331.54 367.107   1
   1 -13  28 2210.74 360.175   7
  -1 -13 -28 2986.14 351.132   6
  -1 -13 -29 3448.55 383.327   6
   1 -13  29 4064.53 450.984   7
  -1 -13 -29 3309.59 412.446   1
  -1 -13 -30 1572.62 271.205   6
   1 -13  30 2095.09 358.079   7
  -1 -13 -30 1411.76 301.479   1
  -1 -13 -31 1020.78 268.564   1
  -1 -13 -31 1061.37 240.492   6
   1 -13  31 1629.91 344.026   7
  -1 -13 -32 2249.15 330.709   6
   1 -13  32 2581.38 397.224   7
  -1 -13 -33 2905.83 373.735   6
  -1 -13 -34 283.313 180.759   6
  -1  14  35 220.455 273.381  12
  -1  14  34-148.097 229.003  12
  -1  14  33 126.395 217.921  12
   1 -14 -32 199.966 214.214   6
   1 -14 -32-186.173 214.333   1
  -1  14  32 189.009 221.746  12
  -1 -14  31 3068.87 427.339   7
   1 -14 -31 2363.54 357.748   1
   1 -14 -31 2379.26 363.713   6
  -1  14  31 2668.30 399.316  12
  -1 -14  30 6603.00 583.609   7
   1 -14 -30 6436.97 543.763   6
   1 -14 -30 6152.33 547.049   1
[truncated: 1,849,354 more chars]
